# Supplementary material for: Root-specific theanine metabolism and regulation at the single-cell level in tea plants (Camellia sinensis)
Source: eLife journal article supplement (doi:10.7554/elife.95891), 2024-05-29
Supplement: fig7-figsupp1-data1 [file elife-95891-fig7-figsupp1-data1-v2.pdf]

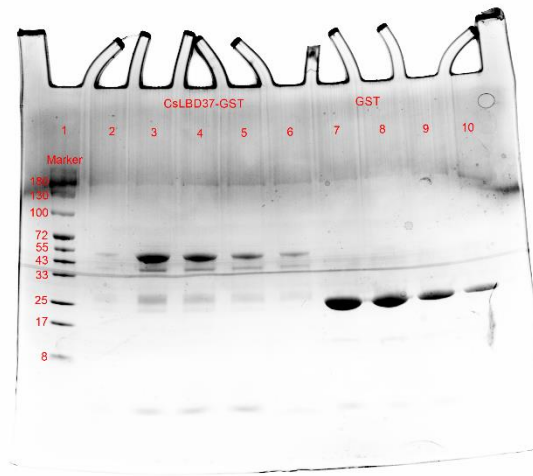

**Figure 7-figure supplement 1, Source Data 1.** Original membranes corresponding to Figure 7-figure supplement 1. Lanes 1 to 10, (1) protein marker; (2-6) CsLBD37-GST protein; (7-10) GST protein.
