# Supplementary material for: Root-specific theanine metabolism and regulation at the single-cell level in tea plants (Camellia sinensis)
Source: eLife. 2024 Oct 14;13:RP95891. doi: 10.7554/eLife.95891 (PMC11473105; doi:10.7554/eLife.95891)
Supplement: Supplementary file 1. [file elife-95891-supp1.xlsx]

## Sheet: Sheet1
	Before QC	After QC
Mean_nUMI	2112.63	1423.37
Mean_nGene	892.228	688.557
Total_cells	12593	10435
Depth (Number of Reads)	332593050
Mean Reads per Cell	26411
Median Genes per Cell	678
Median UMI Counts per Cell	1294
Total Genes Detected	27588
Valid Barcodes	0.955
Valid UMIs	0.999
Q30 Bases in Barcode	0.967
Q30 Bases in RNA Read	0.907
Q30 Bases in UMI	0.964
Fraction Reads in Cells	0.625
Reads Mapped to Genome	0.798
Reads Mapped Confidently to Intergenic Regions	0.131
Reads Mapped Confidently to Intronic Regions	0.023
