# Supplementary material for: Root-specific theanine metabolism and regulation at the single-cell level in tea plants (Camellia sinensis)
Source: eLife. 2024 Oct 14;13:RP95891. doi: 10.7554/eLife.95891 (PMC11473105; doi:10.7554/eLife.95891)
Supplement: Supplementary file 2. [file elife-95891-supp2.xlsx]

## Sheet: Gene expression_scRNA-seq
Gene ID	Cluster 1	Cluster 2	Cluster 3	Cluster 4	Cluster 5	Cluster 6	Cluster 7	Cluster 8	Total expression
CSS0005497	0	0	0	0	0	0	0	0	0
CSS0021670	0	0	0	0	0	0	0	0	0
CSS0044136	0	0	0	0	0	0	0	0	0
CSS0027713	0	0	0	0	0	0	0	0	0
CSS0021574	0	0	0	0	0	0	0	0	0
CSS0027062	0	0	0	0	0	0	0	0	0
CSS0029091	0.000569696	0	0.00103584	0.00123444	0	0.00506377	0	0	0.00790374
CSS0037703	0.0175872	0.0321089	0.0248052	0.0274777	0.0409084	0.0222924	0.0504433	0.0432184	0.258842
CSS0007963	0	0	0	0	0	0	0	0	0
CSS0042349	0	0	0	0	0	0	0	0	0
CSS0037201	0	0	0	0	0	0	0	0	0
CSS0047363	0	0	0	0	0	0	0	0	0
CSS0023209	0	0	0	0	0	0	0	0	0
CSS0024157	0	0	0	0	0	0	0	0	0
CSS0003036	0	0.000794246	0	0.0012686	0	0	0	0	0.00206285
CSS0033558	0.00311386	0.00638697	0.00818595	0.00231246	0	0.00354915	0.00480496	0.00767294	0.0360263
CSS0022978	0.0124854	0.00548323	0.0182163	0.0173733	0.00725512	0.0187037	0.00662237	0.0138427	0.0999821
CSS0043769	0.00653299	0.00722766	0.00473071	0.0103386	0	0.00529227	0.00637211	0.0234968	0.0639911
CSS0006278	0.00594155	0.00745706	0.00738064	0.0185362	0.00759902	0.0112481	0.0339524	0	0.0921149
CSS0025547	0	0	0	0	0	0	0	0	0
CSS0045568	0.115589	0.0415161	0.0925362	0.0790008	0.0859066	0.101368	0.0560015	0.0451929	0.617111
CSS0003848	0	0	0	0	0	0	0	0	0
CSS0039685	0.000928181	0.00112167	0	0.002465	0	0.00300158	0.0181682	0	0.0256846
CSS0021366	0	0	0.000883363	0	0	0	0	0	0.000883363
CSS0017084	0	0	0	0	0	0	0	0	0
CSS0033165	0	0	0	0	0	0	0	0	0
CSS0002559	0	0	0.0016252	0	0	0	0	0	0.0016252
CSS0016153	0.0250114	0.0369052	0.0652481	0.0453417	0.0140218	0.0458085	0.056935	0.0713267	0.360598
CSS0049734	0	0	0	0	0	0	0	0	0
CSS0010051	0	0	0	0.00134138	0	0	0	0	0.00134138
CSS0012520	0.00404298	0.00556069	0.00893756	0.00859428	0	0.0024896	0.0230357	0	0.0526608
CSS0045506	0.0141023	0.00730586	0.0178242	0.0140896	0.0238891	0.0134062	0.0197098	0	0.110327
CSS0012969	0.0243997	0.0316689	0.0401089	0.0296369	0.00664101	0.0192843	0.0185313	0.116986	0.287257
CSS0002064	0.00964828	0.00398074	0.00252835	0.00777152	0.00724205	0.0116838	0.00891749	0.0178767	0.069649
CSS0000382	0.0178738	0.00932908	0.0152853	0.0167714	0.00629087	0.0124579	0.0149833	0.0399227	0.132914
CSS0003153	0.00572957	0.00932082	0.00612284	0.0172497	0	0.00481262	0.0160469	0.0091672	0.0684497
CSS0018580	0	0	0	0	0	0	0	0	0
CSS0017364	0	0	0	0	0	0	0	0	0
CSS0049082	0	0.00127252	0.00705174	0.000988027	0	0	0	0	0.00931229
CSS0026124	0	0	0	0	0	0	0	0	0
CSS0024159	0	0	0	0	0	0	0	0	0
CSS0029024	0.027991	0.0349744	0.0462044	0.0246804	0.0416523	0.0176081	0.063338	0.0304548	0.286904
CSS0041563	0	0	0	0	0	0	0	0	0
CSS0028077	0	0	0	0	0	0	0	0	0
CSS0048270	0.132813	0.0383477	0.116103	0.0740927	0.0682435	0.115537	0.173445	0.145324	0.863906
CSS0000339	0.00335882	0.0035899	0.00459516	0.00923084	0.00998069	0.00248716	0	0.00500107	0.0382436
CSS0038123	0.0104029	0.0175507	0.0332424	0.0188248	0.01487	0.0175331	0.00404531	0.0488824	0.165352
CSS0048980	0	0.00424099	0.00632927	0.00453367	0	0.00944308	0	0.0102391	0.0347861
CSS0016782	0.0463655	0.0750212	0.0587432	0.118645	0.0955253	0.0808692	0.062217	0.070507	0.607894
CSS0025048	0	0	0	0	0	0	0	0	0
CSS0010197	0	0	0	0	0	0	0	0	0
CSS0047234	0.00148267	0.00354506	0.00790638	0.00098296	0.00639002	0.00613012	0	0.00414093	0.0305781
CSS0021737	0	0	0	0	0	0	0	0	0
CSS0014681	0.0271405	0.104492	0.0508461	0.0572113	0.0567767	0.0283067	0.0130841	0.0722219	0.410079
CSS0033222	0	0	0	0.00108076	0	0	0	0	0.00108076
CSS0025439	0.00116034	0.0021237	0.00113283	0	0	0	0	0	0.00441686
CSS0023104	0.00082161	0	0	0	0	0.0026859	0	0	0.00350751
CSS0039108	0.00828299	0.00474088	0.0284078	0.000723139	0	0.0130063	0.00658297	0.008442	0.070186
CSS0010443	0	0	0	0	0	0	0	0	0
CSS0018282	0	0	0.00117953	0	0	0	0	0	0.00117953
CSS0003666	0.0579397	0.0289056	0.107621	0.0415783	0.0502995	0.068648	0.0514792	0.138992	0.545463
CSS0047683	0	0	0	0	0	0	0	0	0
CSS0001110	0	0	0	0	0	0	0	0	0
CSS0034295	0	0.00216637	0.000776351	0.0037962	0.00177694	0	0	0	0.00851585
CSS0014528	0	0	0	0	0	0	0	0	0
CSS0022592	0	0	0.000958264	0.00066779	0	0	0	0	0.00162605
CSS0024658	0.00163105	0.00959767	0.00299166	0.00923987	0	0	0	0	0.0234602
CSS0048819	0.00288016	0	0.00734252	0.00295567	0	0.00569537	0.0138658	0.00609621	0.0388357
CSS0027776	0.021736	0.0105974	0.0291403	0.0248717	0.0175034	0.0186982	0.0278098	0.0263177	0.176674
CSS0007792	0.0201216	0.00762068	0.00856665	0.0133772	0	0.0029798	0	0.0104385	0.0631044
CSS0008581	0	0.00122663	0	0.00120227	0	0	0	0	0.0024289
CSS0018619	0.00177422	0.00125268	0.000951926	0.00229338	0	0	0	0	0.00627221
CSS0040898	0	0	0	0	0	0	0	0	0
CSS0027041	0.214807	0.149151	0.176026	0.31582	0.22416	0.180876	0.261077	0.556345	2.07826
CSS0004298	0.00462621	0.00785835	0.0108558	0.0163857	0.0078735	0.00810961	0.0113381	0.00442047	0.0714677
CSS0020366	0	0	0	0	0	0	0	0	0
CSS0014154	0.680254	0.722327	0.657255	0.76113	1.00984	0.60714	0.740715	0.870611	6.04927
CSS0000965	0.00214486	0.00547904	0.0030911	0.00824584	0	0.00523573	0	0.0105024	0.0346989
CSS0019865	0.200923	0.140786	0.173284	0.192992	0.269138	0.171878	0.480754	0.379516	2.00927
CSS0029460	0	0.00127986	0	0.00114286	0	0	0	0	0.00242272
CSS0048982	0.000617376	0.00130039	0	0.0027252	0	0	0	0.0059046	0.0105476
CSS0047203	0	0.000839554	0	0	0	0	0	0	0.000839554
CSS0045397	0.216724	0.155262	0.129735	0.254469	0.402373	0.231421	0.394103	0.202174	1.98626
CSS0045358	0	0.00126963	0.000874285	0.00127981	0	0	0.0105605	0	0.0139842
CSS0007646	0.020921	0.0121922	0.0362058	0.0354261	0.00890465	0.0448261	0.0117067	0.0612771	0.23146
CSS0035731	0.000742438	0.0044254	0.000955536	0.00318023	0	0.00222739	0.00609994	0.0109863	0.0286172
CSS0029757	0.0017814	0.00274153	0.00296859	0.00377272	0.002857	0	0	0	0.0141212
CSS0020728	0	0.000900284	0.00874278	0.00312423	0	0	0	0	0.0127673
CSS0033453	1.27204	2.08962	1.92526	2.54773	3.22859	2.31392	3.02575	1.88383	18.2867
CSS0012365	0.0103305	0.0317546	0.0374388	0.0335887	0.00534731	0.0342226	0.00607143	0.0106949	0.169449
CSS0006565	0.0248506	0.0371378	0.0318259	0.0566681	0.0167253	0.0350131	0.0193292	0.0319613	0.253511
CSS0049458	0.0169087	0.0148651	0.0187409	0.0308026	0.0213332	0.0300268	0.0683906	0.0474765	0.248544
CSS0027415	0.0021508	0.00696815	0.0146679	0.0178996	0	0.0210894	0.0165619	0.0263148	0.105653
CSS0013263	0	0	0	0	0	0	0	0	0
CSS0012450	0.144492	0.107175	0.23068	0.238457	0.0829198	0.170073	0.47417	0.294639	1.74261
CSS0030056	0	0	0	0	0	0	0	0	0
CSS0000070	0	0	0	0	0	0	0	0	0
CSS0025989	0.000755486	0.00934767	0.00138598	0.0112508	0.00257075	0.00290716	0	0.00441693	0.0326348
CSS0003321	0	0	0	0	0	0	0	0	0
CSS0003262	0	0	0	0	0	0	0	0	0
CSS0049315	0.177959	0.0470065	0.142593	0.0713917	0.0303444	0.0965604	0.167402	0.0626414	0.795898
CSS0028465	0.00982836	0.0108367	0.0132465	0.00878225	0.0140449	0.0238251	0.0166195	0.0295986	0.126782
CSS0026875	0	0	0	0	0	0	0	0	0
CSS0004431	0.000818496	0	0	0	0	0	0	0	0.000818496
CSS0050291	0.0920486	0.0266798	0.0525126	0.0335547	0.0284696	0.0582435	0.00799609	0.0137056	0.313211
CSS0037513	0.00675596	0.00555245	0.0198425	0.0140375	0.00335435	0.0173085	0.0170347	0.00418958	0.0880756
CSS0029529	0.0246546	0.0292196	0.0525945	0.0546671	0.0303888	0.0237884	0.0192406	0.076982	0.311536
CSS0015163	0	0	0	0	0	0	0	0	0
CSS0009404	0	0	0	0.00271766	0	0	0	0	0.00271766
CSS0043062	0	0	0	0	0	0	0	0	0
CSS0002043	0	0	0	0	0	0	0	0	0
CSS0005756	0.0175003	0.00626745	0.0222609	0.0137926	0.00541825	0.00910115	0.0447622	0.00489743	0.124
CSS0025571	0.00155844	0.00223554	0.00624992	0.00196	0.00345809	0	0.00519687	0	0.0206588
CSS0029241	0	0	0	0	0	0	0	0	0
CSS0008679	0.00217028	0.00226087	0.000885932	0.000880996	0.00279801	0.00311347	0	0	0.0121096
CSS0045720	0	0	0	0	0	0	0	0	0
CSS0038704	0	0.00117362	0	0	0	0	0	0.008442	0.00961562
CSS0023528	0.00223542	0.00132123	0.00153984	0.00201245	0.0066502	0.00533591	0	0.00765292	0.026748
CSS0035627	0.042293	0.0314772	0.0547745	0.0648039	0.0367292	0.0386251	0.0395004	0.0652264	0.37343
CSS0042630	0.15225	0.0871507	0.213157	0.17893	0.0916599	0.153561	0.113106	0.206178	1.19599
CSS0013114	0.000800186	0	0.00110765	0.00104806	0	0	0	0	0.0029559
CSS0032014	0	0	0	0	0	0	0	0	0
CSS0020820	0	0	0	0.000832052	0	0	0	0	0.000832052
CSS0018833	0	0	0	0	0	0	0	0	0
CSS0039737	0.0461297	0.0681588	0.0274504	0.0851155	0.0978128	0.0367773	0.0870993	0.0464346	0.494978
CSS0003787	0	0	0.00182109	0	0	0	0	0	0.00182109
CSS0017220	0	0	0	0	0	0	0	0	0
CSS0049788	0.00605167	0	0.00742907	0.00184129	0	0.00521499	0.00380814	0.00422664	0.0285718
CSS0048139	0.000818496	0.00122987	0.00261513	0.00194954	0.00177694	0	0	0	0.00838997
CSS0045496	0	0	0	0	0	0	0	0	0
CSS0035122	0	0.00100541	0.00107073	0.00530351	0	0.0227207	0.00858432	0	0.0386846
CSS0041720	0	0	0	0	0	0	0	0	0
CSS0009254	0	0	0	0	0	0	0	0	0
CSS0006900	0	0	0	0.00153673	0	0	0	0.00523124	0.00676797
CSS0004368	0	0	0	0	0	0	0	0	0
CSS0013362	0	0	0	0	0	0	0	0	0
CSS0010754	0	0	0	0	0	0	0	0	0
CSS0025030	0	0	0	0	0	0	0	0	0
CSS0034254	0	0	0	0	0	0	0	0	0
CSS0019027	0.0597453	0.10472	0.144384	0.104913	0.0765898	0.170578	0.0841413	0.166197	0.911269
CSS0035132	0.155746	0.0557252	0.164533	0.0972933	0.067012	0.123918	0.131197	0.276479	1.0719
CSS0001153	0.000724574	0.00112561	0.00177083	0.00423818	0	0	0	0.00397391	0.0118331
CSS0036206	0	0	0.00240173	0.000877722	0.00216022	0	0	0	0.00543968
CSS0031594	0.0578252	0.0408368	0.10585	0.0390165	0.0239637	0.0219637	0.0314171	0.0384289	0.359302
CSS0041231	0.0281888	0.0270978	0.054055	0.0426048	0.024503	0.0427275	0.0203031	0.0817693	0.321249
CSS0033981	0.0167049	0.0143649	0.0267941	0.0128349	0.00755054	0.0477144	0.00894467	0.281809	0.416717
CSS0050159	0.0112024	0.0190226	0.0224103	0.0155029	0.00994939	0.0113312	0	0.0179323	0.107351
CSS0038895	0.00339351	0.00702632	0.0315835	0.0376724	0.00762909	0.0339228	0.0103292	0.0338627	0.16542
CSS0015914	0.083596	0.104804	0.120036	0.161955	0.14436	0.0788156	0.138811	0.127345	0.959722
CSS0026576	0.0142429	0	0.0174516	0.00362549	0.00623685	0.009952	0.0157105	0	0.0672194
CSS0019117	0.165048	0.146904	0.173994	0.226813	0.321495	0.244747	0.251913	0.168696	1.69961
CSS0004654	0	0	0	0	0	0	0	0	0
CSS0034962	0	0	0	0	0	0	0	0	0
CSS0022653	0	0	0	0	0	0	0	0	0
CSS0013585	0	0.00117986	0	0	0	0	0	0	0.00117986
CSS0023030	0	0	0	0	0	0	0	0	0
CSS0002342	0	0	0	0	0	0	0	0	0
CSS0000467	0	0	0	0	0	0	0	0	0
CSS0018771	0.0385585	0.101665	0.0845204	0.0818876	0.17169	0.0691228	0.0383454	0.167942	0.753732
CSS0024755	0	0	0	0	0	0	0	0	0
CSS0042133	0	0	0	0	0	0	0	0	0
CSS0013340	0.0035874	0.00217576	0.00554408	0.00249772	0.00864497	0.00243487	0.059432	0.00614269	0.0904594
CSS0049062	0	0.00124719	0.00100036	0.00105307	0	0	0	0	0.00330062
CSS0018904	0	0	0	0	0	0	0	0	0
CSS0011030	0	0	0	0	0	0	0	0	0
CSS0004062	0	0	0	0	0	0	0	0	0
CSS0043379	0	0	0	0	0	0	0	0	0
CSS0022727	0	0	0	0	0	0	0	0	0
CSS0021857	0.00074888	0.000725938	0.0016748	0	0	0	0	0	0.00314962
CSS0042396	0	0	0	0	0	0	0	0	0
CSS0034724	0	0	0	0	0	0	0	0	0
CSS0043971	0.0100181	0.00126963	0.0101613	0.00276513	0	0	0	0	0.0242141
CSS0014982	0	0	0	0.00137835	0	0	0.0049894	0	0.00636774
CSS0034226	0	0	0	0	0	0	0	0	0
CSS0003098	0	0	0	0	0	0	0	0	0
CSS0045692	0	0	0.00229402	0.00328451	0.00709786	0	0	0	0.0126764
CSS0023327	0.0262401	0.0585643	0.0347716	0.0556331	0.0524496	0.0197886	0.0667438	0.0613386	0.37553
CSS0039021	0	0	0	0	0	0	0	0	0
CSS0049123	0	0.000966947	0	0.00174126	0	0	0	0.00418958	0.00689779
CSS0007944	0.00128699	0.00181477	0	0.00886063	0.00378969	0	0.017643	0	0.0333951
CSS0026566	0.0021171	0	0	0.00232914	0	0.00435018	0	0.00423468	0.0130311
CSS0050322	0	0	0.00271993	0	0	0	0	0	0.00271993
CSS0043994	0.00248766	0.00669868	0.00102582	0.0087054	0	0.0113085	0.00802114	0	0.0382472
CSS0034519	0	0	0	0	0	0	0	0	0
CSS0018866	0.0170284	0.00660247	0.0220159	0.017963	0.0201873	0.0140494	0.0187641	0.0106234	0.127234
CSS0022210	0	0	0	0	0	0	0	0	0
CSS0007351	0.000724574	0.00122663	0.000674819	0.000732033	0.00296931	0.00559901	0	0	0.0119264
CSS0023519	0	0	0	0	0	0	0	0.00533489	0.00533489
CSS0032076	0	0	0.00123913	0	0	0	0.00721418	0	0.00845332
CSS0035099	0.00133407	0.00130828	0.0126211	0.00343962	0	0	0	0	0.018703
CSS0035771	0.00091079	0.0025337	0.00633428	0.00286636	0	0.00433524	0	0	0.0169804
CSS0034744	0	0	0	0	0	0	0	0	0
CSS0041362	0	0	0	0	0	0	0	0	0
CSS0031479	0	0	0.00104138	0	0	0	0	0	0.00104138
CSS0038152	0	0	0	0	0	0	0	0	0
CSS0049705	0	0	0	0	0	0	0	0	0
CSS0016951	0	0	0	0	0	0	0	0	0
CSS0045032	0	0	0.000888824	0	0	0	0	0.00917482	0.0100636
CSS0030146	0.00117421	0	0	0.00262026	0	0.0107795	0.00966254	0	0.0242365
CSS0029281	0.00211969	0.00397336	0.00223305	0.014456	0	0.00424717	0	0	0.0270293
CSS0036906	0.019824	0.00682018	0.0289251	0.0122502	0.0179197	0.0245713	0.0340177	0.0204127	0.164741
CSS0042597	0.00682725	0.0195774	0.0174261	0.0766733	0.0299582	0.0217497	0.00541044	0.0151453	0.192768
CSS0038932	0.020034	0.055286	0.0360194	0.0520693	0.0256132	0.0581838	0.0180933	0.117497	0.382796
CSS0014976	0	0	0	0	0	0	0	0	0
CSS0036302	0.00638513	0.00903337	0.0163659	0.018319	0.0127537	0.0212631	0.11784	0.00451728	0.206478
CSS0037063	0.00193696	0.00410772	0.0507825	0.00426903	0	0	0.00546062	0.00505241	0.0716093
CSS0013838	0	0	0	0	0	0	0	0	0
CSS0048397	0	0	0.00196184	0	0	0	0	0	0.00196184
CSS0034459	0.000599658	0.00125895	0.00274568	0	0	0	0	0.00515546	0.00975975
CSS0017622	0.00172443	0.000788965	0.00129163	0	0	0	0	0	0.00380503
CSS0008678	0	0	0	0	0	0	0	0	0
CSS0040721	0	0	0.0144264	0.000862765	0	0	0	0	0.0152892
CSS0032971	0.00154712	0.00102747	0.0206254	0	0	0	0.00963903	0	0.032839
CSS0017252	0	0	0	0	0	0	0	0	0
CSS0046925	0	0	0	0	0	0	0	0	0
CSS0032881	0	0	0.00144537	0	0	0	0	0	0.00144537
CSS0019422	0	0	0	0	0	0	0	0	0
CSS0025813	0	0	0	0	0	0	0	0	0
CSS0043533	0.0073352	0.0169183	0.0210721	0.022052	0.00756087	0.0291284	0.0123271	0.0252675	0.141662
CSS0040419	0.0520323	0.161583	0.070273	0.193182	0.210577	0.0759965	0.0809706	0.0986117	0.943226
CSS0000792	0.0530238	0.107504	0.0872464	0.16981	0.076795	0.141238	0.122144	0.142839	0.9006
CSS0050484	0.0615886	0.0326111	0.0798231	0.067945	0.0232044	0.0414457	0.0705529	0.139701	0.516872
CSS0035441	0.0113332	0	0.0199101	0.00713386	0	0	0	0.0149138	0.053291
CSS0048558	0.00155669	0	0.000994925	0.00343414	0	0	0	0	0.00598575
CSS0015153	0.873208	0.696462	0.940551	0.931944	0.873117	0.744272	0.699263	1.30461	7.06342
CSS0033136	0.00535483	0.00200013	0.00629249	0.015478	0.00243571	0.0125942	0.00704303	0	0.0511984
CSS0045736	0	0	0	0	0	0	0	0	0
CSS0020922	0.000929341	0	0.00600321	0.00186741	0	0	0.0052838	0	0.0140838
CSS0022849	0	0	0	0	0	0	0	0	0
CSS0011244	0	0	0	0	0	0	0	0	0
CSS0045427	0	0	0	0	0	0	0	0	0
CSS0024163	0.00122646	0.00603054	0.0107754	0.00849422	0	0.00370701	0.0188666	0.00933919	0.0584394
CSS0047366	0	0	0	0	0	0	0	0	0
CSS0032039	0	0	0	0	0	0	0	0	0
CSS0003186	0	0	0	0	0	0	0	0	0
CSS0040951	0	0	0	0	0	0	0	0	0
CSS0018359	0	0	0	0	0	0.00353635	0	0	0.00353635
CSS0037157	0	0	0	0	0	0	0	0	0
CSS0006463	0	0	0.000804448	0	0	0	0	0	0.000804448
CSS0019796	0	0	0.00399476	0	0	0	0	0	0.00399476
CSS0046947	0.00122227	0.00361578	0.000883363	0.0026898	0	0	0	0	0.00841122
CSS0026431	0	0	0	0	0	0	0	0	0
CSS0004378	0.160632	0.207419	0.176822	0.236413	0.192109	0.162681	0.221383	0.27562	1.63308
CSS0048467	0	0	0	0	0	0	0	0	0
CSS0021379	0	0	0	0	0	0	0	0	0
CSS0032251	0.00149061	0.011169	0.00110791	0.00498538	0.0114833	0	0	0	0.0302362
CSS0034845	0	0.00128508	0	0	0	0	0	0	0.00128508
CSS0028055	0	0	0	0	0	0	0	0	0
CSS0015574	0.00386673	0.00849176	0.00930717	0.00826048	0	0.0120743	0.00451109	0.0146099	0.0611214
CSS0018603	0.00151121	0.00532739	0.00550506	0.00193436	0	0.00318614	0	0	0.0174642
CSS0008753	0.0302662	0.0109427	0.0313303	0.0248695	0.00884691	0.0162679	0.0361996	0.071438	0.230161
CSS0041589	0.00358362	0.005422	0.00367337	0.00530663	0.00480899	0	0.00559658	0	0.0283912
CSS0007811	0	0	0	0	0	0	0	0	0
CSS0012567	0.00934676	0.0305954	0.0666557	0.0490683	0.0171532	0.0250397	0.0162705	0.0338588	0.247988
CSS0003999	0	0.00362097	0.0029717	0.00123272	0	0	0	0	0.00782539
CSS0000442	0.00390379	0.00638953	0.00818011	0.0144293	0.0044549	0.00896531	0.0284347	0.0129991	0.0877568
CSS0045774	0	0.00428348	0.00125074	0.000976427	0	0	0	0	0.00651065
CSS0036059	0	0	0	0	0	0	0	0	0
CSS0044679	0.0598996	0.0227735	0.0575252	0.0493762	0.0243072	0.0635506	0.157525	0.151944	0.586901
CSS0014996	0.0906883	0.0797449	0.217461	0.1744	0.225111	0.132831	0.333355	0.192268	1.44586
CSS0050402	0.13691	0.0494293	0.133995	0.0749981	0.0392784	0.0755856	1.37688	0.0319318	1.91901
CSS0032188	0.0191546	0.00914605	0.0195883	0.0125463	0.0189248	0.0116051	0.0169515	0.0304274	0.138344
CSS0033127	0.000459798	0	0.00161213	0.00103054	0	0	0	0	0.00310247
CSS0036051	0	0	0	0	0	0	0	0	0
CSS0022171	0	0	0	0	0	0	0	0	0
CSS0000116	0	0	0.000973898	0	0	0	0	0	0.000973898
CSS0003077	0.000613074	0.00116308	0	0	0.00196787	0	0	0.00921309	0.0129571
CSS0041399	0	0	0	0	0	0	0	0	0
CSS0001089	0.00194428	0.0010222	0.00270056	0.00353645	0	0.00328943	0	0.0119501	0.0244431
CSS0043968	0.0305696	0.0593704	0.0941484	0.103766	0.0596846	0.114852	0.0899302	0.150819	0.703139
CSS0039944	0.0201431	0.00821705	0.019441	0.0206424	0.0153512	0.0220481	0.0171272	0.0118963	0.134866
CSS0009909	0.0300007	0.00620004	0.0151782	0.0103234	0.0159625	0.0225974	0	0	0.100262
CSS0019720	0.000681578	0.00230155	0.00120143	0.00308224	0	0	0	0.00588508	0.0131519
CSS0049709	0.116462	0.256631	0.174406	0.271223	0.457111	0.142779	0.294811	0.367677	2.0811
CSS0034969	0	0.00120283	0	0.000982379	0	0	0	0.00750391	0.00968912
CSS0027891	0	0	0	0.00102989	0	0	0	0	0.00102989
CSS0021342	0.00451656	0.0043908	0.00317307	0.00385387	0.00364765	0.00921707	0.0101453	0.0175709	0.0565152
CSS0036632	0	0	0.000855503	0.00308691	0.00477231	0.00251534	0	0	0.0112301
CSS0020176	0	0	0	0	0	0	0	0	0
CSS0012373	0.00149696	0.00114232	0	0.00118776	0.00509458	0.0056089	0	0.0040663	0.0185968
CSS0011540	0.00222356	0	0.00258791	0.00296566	0	0.00615505	0	0.00428968	0.0182219
CSS0023072	0	0	0	0	0	0	0	0.00516301	0.00516301
CSS0034138	0	0	0	0.000738165	0	0	0	0	0.000738165
CSS0000169	0	0	0	0	0	0	0	0	0
CSS0023700	0.00073757	0.000917847	0	0	0	0.00296254	0	0.00901719	0.0136351
CSS0042589	0	0	0	0	0	0	0	0	0
CSS0031265	0.00608341	0.00454592	0.0191933	0.0194206	0	0	0.00688024	0	0.0561234
CSS0042973	0.00206636	0.00348607	0.0144975	0.00120452	0	0.00793074	0	0.00661475	0.0358
CSS0047188	0.00132038	0.00101407	0.00103871	0	0	0.00652306	0	0	0.00989623
CSS0031708	0	0	0.00135941	0.00111558	0	0	0	0	0.00247499
CSS0009164	0.0510845	0.0871948	0.0503219	0.071436	0.124921	0.0557474	0.0801578	0.0955949	0.616458
CSS0004896	0.00188614	0.00537246	0.00440907	0.00848377	0.00792022	0	0.0136134	0	0.041685
CSS0015779	0.00128794	0	0.00184781	0.00118405	0.00423515	0	0	0	0.00855495
CSS0050380	0	0	0	0	0	0	0	0	0
CSS0005550	0.00140755	0	0	0.0010026	0.0110431	0.00261484	0	0	0.0160681
CSS0035326	0	0	0	0	0	0	0	0	0
CSS0023349	0	0	0	0	0	0	0	0	0
CSS0040338	0.000856243	0	0	0	0	0	0	0	0.000856243
CSS0000065	0	0.00118158	0.00150962	0	0	0	0	0	0.0026912
CSS0019235	0.000787499	0	0	0.000969997	0	0	0	0	0.0017575
CSS0014370	0	0	0	0.00118652	0	0	0	0	0.00118652
CSS0044866	0.937099	1.56411	1.24177	2.4929	2.20155	1.54357	1.96215	1.68602	13.6292
CSS0048572	0.00384359	0.00128209	0.00175204	0.00280974	0.004141	0.00271567	0.00483872	0.00894594	0.0303288
CSS0041359	0	0	0	0	0	0	0	0	0
CSS0036749	0	0	0	0	0	0	0	0	0
CSS0014554	0	0	0	0	0	0	0	0	0
CSS0020723	0	0	0	0	0	0	0	0	0
CSS0038839	0	0	0	0	0	0	0	0	0
CSS0050109	0.000868076	0	0.00104723	0	0	0	0	0	0.0019153
CSS0031127	0	0.00116144	0	0	0.00330046	0	0	0	0.0044619
CSS0044594	0	0	0	0	0	0	0	0	0
CSS0007226	0	0	0	0	0	0	0.00560776	0	0.00560776
CSS0040598	0.0180457	0.0722025	0.0284395	0.0606591	0.0666878	0.0309304	0.0885287	0.0125628	0.378056
CSS0009565	0.00258843	0.00840804	0.00671824	0.00905056	0	0.0064439	0.00381368	0.00598542	0.0430083
CSS0042574	0.00232898	0.00195017	0.00486261	0.00429539	0	0.00248716	0.00424815	0	0.0201725
CSS0027742	0	0	0	0.000873011	0	0	0	0	0.000873011
CSS0022150	0	0.0023036	0	0	0	0	0	0	0.0023036
CSS0033098	0.045935	0.0904198	0.0882999	0.204788	0.0847308	0.0772325	0.0995532	0.117523	0.808482
CSS0050047	0.0339445	0.0335964	0.0521999	0.0497709	0.0452441	0.0879741	0.105743	0.121659	0.530132
CSS0044625	0	0	0	0	0	0	0	0	0
CSS0032293	0	0	0	0	0	0	0	0	0
CSS0020823	0.00180701	0.00729055	0.00145715	0.0191097	0	0.00468719	0	0	0.0343516
CSS0007733	0	0	0	0	0	0	0	0	0
CSS0011196	0	0.00128284	0	0.00201887	0.00432365	0.00845214	0.0082485	0	0.024326
CSS0015472	0.0244693	0.0157688	0.0400614	0.03461	0.0102199	0.0386411	0.0369222	0.0359128	0.236605
CSS0007255	0.00819896	0.00635112	0.00811563	0.00716173	0	0	0	0.059717	0.0895444
CSS0008359	0	0	0	0	0	0	0	0	0
CSS0047847	0	0	0	0	0	0	0	0	0
CSS0029726	0.000815802	0	0	0.00189545	0	0	0	0	0.00271125
CSS0019011	0	0	0	0	0	0	0	0	0
CSS0005194	0	0	0	0	0	0	0	0	0
CSS0048693	0	0	0	0	0	0	0	0	0
CSS0020394	0	0	0	0	0	0	0	0	0
CSS0019479	0	0	0	0	0	0	0	0	0
CSS0044253	0	0	0	0	0	0	0	0	0
CSS0040800	0	0	0	0	0	0	0	0	0
CSS0019095	0.0341307	0.0322443	0.0429224	0.0544883	0.00498905	0.0362844	0.016788	0.294252	0.516099
CSS0000389	0.0810878	0.0511032	0.0419675	0.0650616	0.0112506	0.0557954	0.017042	0.0450295	0.368338
CSS0031564	0.0133733	0.0233031	0.0310605	0.0299761	0.0509335	0.0278672	0.0419606	0.0611527	0.279627
CSS0039738	0.0326601	0.0351158	0.0485815	0.0359822	0.0195091	0.0321844	0.0391181	0.0312128	0.274364
CSS0002756	0	0	0	0	0	0	0	0	0
CSS0006260	0	0	0	0	0	0	0	0	0
CSS0040987	0	0	0	0	0	0	0	0	0
CSS0038830	0	0	0	0	0	0	0	0	0
CSS0031179	0	0	0	0	0	0	0	0	0
CSS0019509	0	0	0.00117892	0	0	0	0	0	0.00117892
CSS0035600	0.0224456	0.0258744	0.0549014	0.0371182	0.0183376	0.0296892	0.02476	0.0340477	0.247174
CSS0015422	0.000536748	0.00354724	0.00328318	0	0	0	0	0.0234205	0.0307876
CSS0044059	0	0	0	0	0	0	0	0	0
CSS0045052	0.00397264	0.00128659	0.00950239	0.00414872	0	0	0	0	0.0189103
CSS0031915	0	0	0	0.00102622	0	0	0	0	0.00102622
CSS0048479	0	0	0	0	0	0	0	0	0
CSS0048056	0	0	0	0	0	0	0	0	0
CSS0017353	0	0	0	0	0	0	0	0	0
CSS0047586	0	0	0	0	0	0	0	0	0
CSS0021443	0.0117085	0.00945262	0.0136992	0.0209845	0.00274396	0.0447894	0.00640984	0.0200358	0.129824
CSS0046856	0	0	0.00104362	0	0	0	0	0	0.00104362
CSS0047502	0.011085	0.0522803	0.0160881	0.0413948	0.00672463	0.00833527	0.0289569	0.0531233	0.217988
CSS0001130	0.0901077	0.207052	0.219966	0.527936	0.299301	0.40839	0.262375	0.239716	2.25484
CSS0013833	0	0	0.00117984	0	0	0	0	0	0.00117984
CSS0028406	0.0481047	0.110181	0.125661	0.181619	0.224486	0.0774102	0.115971	0.197049	1.08048
CSS0007817	0.00606215	0.0199211	0.00634956	0.0184366	0.00781085	0.0154905	0.0212244	0.00514961	0.100445
CSS0020257	0.0155942	0.0202131	0.00848581	0.0215527	0.00372136	0.0479506	0.0120684	0.033242	0.162828
CSS0038722	0.000911334	0.000806859	0	0.00200404	0	0	0.00549145	0.00431694	0.0135306
CSS0010043	0.000800186	0.00108352	0	0.00120678	0	0	0.00404531	0	0.00713579
CSS0005185	0	0	0	0	0	0	0	0	0
CSS0009425	0	0.00219605	0.0032449	0.00104155	0	0	0.00696042	0.00959119	0.0230341
CSS0039280	0.00282889	0.000757173	0	0.00212001	0	0.00596952	0.00426171	0	0.0159373
CSS0035486	0.000593154	0.00768377	0.00145445	0.00441185	0	0.00469729	0.00640984	0.0050191	0.0302695
CSS0040872	0	0	0	0	0	0	0	0	0
CSS0018543	0.00745781	0.0149858	0.0292852	0.0111363	0.00191844	0.00790783	0.0155555	0.0110366	0.0992834
CSS0020846	0	0	0	0	0	0	0	0	0
CSS0009082	0	0	0	0.000917507	0	0	0	0	0.000917507
CSS0048393	0	0	0	0.00302543	0	0	0	0	0.00302543
CSS0036719	0	0	0	0	0	0	0	0	0
CSS0024824	0	0	0	0	0	0	0	0	0
CSS0041510	0.0463574	0.0920298	0.0769355	0.0881464	0.0816621	0.127505	0.0574838	0.154261	0.724381
CSS0034951	0.0279915	0.0196374	0.0458967	0.0431854	0.0342843	0.0220295	0.0253134	0.0403378	0.258676
CSS0015621	0.0332862	0.0335281	0.0223518	0.0436748	0.0130547	0.0789025	0.0769662	0.0174872	0.319251
CSS0033838	0	0	0	0	0	0	0	0	0
CSS0035481	0.0102338	0.046042	0.0211021	0.0118298	0.0229948	0.0241983	0.00802114	0.033028	0.17745
CSS0004401	0	0	0	0	0	0	0	0	0
CSS0025253	0.0106591	0.0046473	0.0194462	0.0103727	0	0.0168369	0.0169625	0.00712452	0.0860492
CSS0035145	0.065978	0.16466	0.0529994	0.111656	0.0665864	0.0678988	0.0653878	0.0862924	0.681458
CSS0002390	0.000569696	0.00439855	0.00221275	0	0	0.00433254	0	0.0095365	0.02105
CSS0033081	0.0316369	0.0557318	0.0606991	0.0886016	0.0508384	0.075092	0.0383047	0.0446627	0.445567
CSS0027212	0.0284919	0.0195703	0.03144	0.103135	0.0683653	0.0436437	0.0350078	0.0281572	0.357812
CSS0009737	0	0	0	0	0	0	0	0	0
CSS0030750	0.0722423	0.152305	0.132132	0.232181	0.368194	0.124753	0.199141	0.214844	1.49579
CSS0005417	0.000335189	0	0	0	0	0	0	0	0.000335189
CSS0036683	0.00138773	0	0	0.00254119	0	0.0111639	0	0	0.0150928
CSS0018144	0	0.00233744	0	0	0	0	0	0.00619134	0.00852878
CSS0028096	0.020689	0.013162	0.0388734	0.0384366	0.00766829	0.0262616	0.0155668	0.00407961	0.164737
CSS0030755	0.297651	0.394981	0.747598	0.842482	0.737805	0.671226	0.64033	0.800005	5.13208
CSS0041539	0.0327886	0.0745114	0.0476929	0.0935996	0.0982243	0.0616329	0.0958653	0.108855	0.61317
CSS0046325	0.00156082	0	0.000976945	0	0	0.00327616	0	0	0.00581393
CSS0031958	0	0	0	0	0	0	0	0	0
CSS0003217	0.000755486	0.0123978	0.000924844	0.00660154	0.00399766	0.00291363	0	0	0.027591
CSS0024221	0.0148004	0.0157342	0.0034656	0.029706	0.0101813	0.0503211	0.021286	0.0805832	0.226078
CSS0033737	0.0257751	0.0215607	0.0583865	0.0519389	0.0214674	0.021428	0.0242998	0.0250959	0.249952
CSS0028582	0.0199534	0.00775214	0.0172097	0.00893075	0	0.022766	0.0308093	0	0.107421
CSS0033720	0	0.00193399	0.000888824	0.00182961	0	0.00310183	0	0	0.00775426
CSS0001760	0.00714922	0.0212472	0.00787367	0.0337753	0.00820847	0.00481262	0.0208832	0	0.10395
CSS0027147	0.0292487	0.0161376	0.0453537	0.0239002	0.00997163	0.00701797	0.0473811	0.0102231	0.189234
CSS0021706	0.000994298	0.00113616	0.000795696	0.00361291	0.00290581	0	0	0	0.00944488
CSS0018711	0	0	0	0	0	0	0	0	0
CSS0034790	0	0	0	0	0	0	0	0	0
CSS0033158	0	0	0	0	0	0	0	0	0
CSS0002849	0.0505812	0.0370059	0.0789535	0.0439582	0.0411841	0.0277291	0.0556697	0.123445	0.458526
CSS0002562	0.0298508	0.0162353	0.0607071	0.0108633	0	0.0131954	0.0223023	0.00538343	0.158538
CSS0040875	0	0	0	0	0	0	0	0	0
CSS0039315	0	0	0	0	0	0	0	0	0
CSS0039327	0.00076891	0	0	0.000800368	0	0	0	0	0.00156928
CSS0002523	0	0	0	0	0	0	0	0	0
CSS0003817	0.000683628	0.00925895	0.00814154	0.00673172	0.00419518	0.00433524	0.00404531	0.0163836	0.0537751
CSS0045520	0.00180064	0.00445393	0.00664783	0.00937667	0.00421263	0.00376275	0	0.00558646	0.0358409
CSS0018584	0.00301252	0.00531642	0.0073917	0.00288091	0	0.00554695	0	0.032999	0.0571475
CSS0047859	0.0168952	0.0308061	0.0239225	0.0339319	0.0294681	0.0137	0.0143743	0.0433191	0.206417
CSS0041378	0	0	0	0	0	0	0	0	0
CSS0022262	0	0	0	0	0	0	0	0	0
CSS0030289	0	0	0	0	0	0	0	0	0
CSS0044686	0.370336	0.123858	0.328001	0.206394	0.179388	0.177976	0.359027	0.232467	1.97745
CSS0026842	0	0	0	0	0	0	0	0	0
CSS0006346	0.0234802	0.020512	0.0337133	0.0396019	0.0132517	0.0227554	0.0147655	0.0283335	0.196413
CSS0049751	0.00552072	0.00184497	0.00416035	0.00262846	0	0	0	0.0127706	0.0269251
CSS0048192	0	0	0	0	0	0	0	0	0
CSS0010364	0.000727012	0.000819581	0.00103101	0.00208137	0	0.00262109	0	0	0.00728006
CSS0041886	0	0	0.000718841	0	0	0	0	0	0.000718841
CSS0024991	0.0541582	0.206763	0.214063	0.484571	0.135859	0.198231	0.243339	0.162942	1.69993
CSS0036920	0.0105745	0.0167787	0.0170164	0.035518	0.0235319	0.015787	0	0.0392124	0.158419
CSS0022021	0.0379281	0.0316509	0.0353383	0.0451936	0.0264921	0.0190379	0.049445	0.044591	0.289677
CSS0023051	0.000744762	0	0	0	0	0	0	0	0.000744762
CSS0003969	0.00299154	0.00466242	0.00575986	0.00269625	0.00537357	0.0116695	0	0.015487	0.0486402
CSS0031267	0.00314871	0.00128358	0.00314469	0.00643588	0.00429637	0.00443132	0	0	0.0227406
CSS0002021	0	0	0	0	0	0	0	0	0
CSS0024838	0.00216723	0.0127791	0.00449931	0.018368	0.00364872	0.0142231	0.0143753	0	0.0700606
CSS0039716	0	0	0	0	0	0	0	0	0
CSS0021387	0.00214158	0.00129496	0.00281065	0.00255414	0	0	0.00565822	0.00547213	0.0199317
CSS0014906	0.00139781	0.00168941	0.00875978	0.00507964	0.0151657	0.0048064	0	0	0.0368987
CSS0024191	0	0	0	0	0	0	0	0	0
CSS0000191	0.00391416	0.00287114	0.00425157	0.0125498	0.0151016	0.00589694	0.00664999	0.0139211	0.0651563
CSS0004023	0	0.00206634	0	0.00637234	0.00459051	0	0.0214017	0	0.0344308
CSS0002547	0	0.00229789	0	0.00121957	0	0	0	0	0.00351746
CSS0015620	0	0	0	0	0	0	0	0	0
CSS0049575	0.0738362	0.075965	0.156457	0.0864969	0.0329338	0.108594	0.112129	0.246073	0.892484
CSS0010367	0.161765	0.128156	0.145094	0.161108	0.106089	0.175505	0.0469132	0.0277961	0.952427
CSS0002591	0.112352	0.262045	0.170148	0.513306	0.350431	0.256126	0.152283	0.2291	2.04579
CSS0007064	0.0782363	0.0500594	0.11876	0.0778908	0.0779638	0.103746	0.113165	0.12574	0.74556
CSS0012048	0	0	0	0	0	0	0	0	0
CSS0017262	0.0360345	0.0601009	0.0594139	0.0713957	0.0217589	0.0618963	0.0728126	0.0981402	0.481553
CSS0013732	0.00263514	0.00249156	0.0151286	0	0	0.00838439	0.0190959	0.0148021	0.0625376
CSS0045225	0.0133344	0.0176564	0.0162798	0.0122781	0.0172973	0.0714851	0.051469	0.0495103	0.24931
CSS0007340	0.00726221	0.00498602	0.00979217	0.0110182	0.0329364	0.0117022	0.0153957	0.00469462	0.0977875
CSS0028526	0.00136626	0.00317304	0.000746254	0	0	0	0	0	0.00528555
CSS0046894	0	0	0	0	0	0	0	0	0
CSS0014649	0.424813	0.258786	0.468156	0.501927	0.57579	0.429587	0.446759	0.32819	3.43401
CSS0017911	0	0	0.00242379	0	0	0.00373416	0	0.0104237	0.0165816
CSS0030208	0	0	0	0	0	0	0	0	0
CSS0014623	0	0	0	0	0	0	0	0	0
CSS0037003	0.000790614	0	0.000970496	0	0	0	0	0	0.00176111
CSS0000392	0	0	0	0	0	0	0	0	0
CSS0035091	0	0.00125268	0.00395818	0.00243463	0	0	0.00417704	0	0.0118225
CSS0018972	0.0340011	0.0243231	0.0991168	0.0742792	0.0285224	0.0623809	0.0394296	0.080791	0.442844
CSS0015038	0	0	0	0.00227483	0	0	0.00721039	0	0.00948522
CSS0042054	0	0	0	0	0	0	0	0	0
CSS0043401	0	0.00148245	0.00194742	0.00419361	0	0.00255343	0	0	0.0101769
CSS0012183	0.00889047	0.0154455	0.00890349	0.0250276	0.0117196	0.0197821	0.0202735	0.0172409	0.127283
CSS0024640	0.0155647	0.0384901	0.026783	0.0698863	0.069901	0.0393133	0.0456695	0.0435327	0.349141
CSS0044728	0.00903068	0.00407146	0.0165723	0.00693212	0	0.0128764	0.0123094	0.0221074	0.0838997
CSS0037773	0.0873753	0.0260647	0.0564008	0.0575806	0.048293	0.0378824	0.0877402	0.0541297	0.455467
CSS0029358	0	0	0	0	0	0	0	0	0
CSS0041673	0.0233915	0.0085493	0.027674	0.007783	0.00583447	0.0206286	0.0240861	0.0674212	0.185368
CSS0026294	0.0320555	0.0147566	0.0259004	0.00829619	0.00619533	0.0218757	0.0257156	0.0499779	0.184773
CSS0001595	0.0606379	0.239316	0.125482	0.330462	0.175003	0.135181	0.10771	0.0809941	1.25479
CSS0011231	0.0154072	0.0137344	0.050665	0.018411	0.00673414	0.0583132	0	0.157544	0.320809
CSS0049621	0	0	0	0	0	0	0	0.00736432	0.00736432
CSS0009139	0	0	0	0	0	0	0	0	0
CSS0048737	0	0	0	0	0	0	0	0	0
CSS0016656	0.083753	0.116442	0.10091	0.102177	0.0506834	0.153242	0.0377587	0.152764	0.797731
CSS0047243	0	0	0	0	0	0	0	0	0
CSS0009362	0.0421174	0.0142972	0.0234259	0.0299897	0.0220355	0.0309983	0	0.00668728	0.169551
CSS0015563	0	0	0	0	0	0	0	0	0
CSS0043642	0.0262182	0.0141353	0.0302277	0.0271473	0.0381999	0.0268386	0.0880012	0.10378	0.354549
CSS0018507	0	0	0.000636173	0	0	0	0	0	0.000636173
CSS0024672	0.00782585	0.0143102	0.0125479	0.0251632	0.0148394	0.00634026	0.013662	0.0257271	0.120416
CSS0049554	0.00551081	0.0173672	0.0123715	0.0127309	0	0.0103928	0.0426079	0	0.100981
CSS0000219	0.0152805	0.00719406	0.00694133	0.00605674	0.00533732	0.00966956	0	0.0526765	0.103156
CSS0035756	0	0	0	0	0	0	0	0	0
CSS0039592	0	0	0	0	0	0	0	0	0
CSS0025800	0.00236793	0.00075768	0.00407957	0.00106187	0	0	0.00385426	0	0.0121213
CSS0012304	0.00398252	0.0067338	0.00252584	0.00230178	0.00333219	0.0134412	0	0.0324182	0.0647354
CSS0034680	0	0	0	0	0	0	0	0	0
CSS0009934	0.00706162	0.0194355	0.0173307	0.024661	0.00603027	0.0232469	0.0302583	0.0247228	0.152747
CSS0006653	0.000782051	0.00157422	0	0	0	0	0	0	0.00235627
CSS0023989	0	0	0	0	0	0	0	0	0
CSS0028619	0	0	0	0	0	0	0	0	0
CSS0038209	0	0	0	0	0	0	0	0	0
CSS0022533	0.020443	0.036377	0.0123195	0.0654828	0.0344521	0.0895328	0.0292755	0.0647091	0.352592
CSS0049359	0.00581235	0.0108219	0.00564339	0.00857091	0	0.0319715	0.0037891	0.0228496	0.0894587
CSS0034334	0.00295865	0.00537149	0.00693864	0.00632582	0.0196017	0.00342865	0.0108114	0.0085692	0.0640055
CSS0043906	0	0	0	0	0	0	0	0	0
CSS0046829	0.000804555	0	0.00758619	0.00153187	0	0	0	0.00794992	0.0178725
CSS0044970	0	0	0	0	0	0	0	0	0
CSS0031740	0	0	0	0	0	0	0	0	0
CSS0049922	0	0	0	0	0	0	0	0	0
CSS0036061	0	0	0	0	0	0	0	0	0
CSS0003608	0.008084	0.00430764	0.00775791	0.00638555	0.00673726	0.00861549	0	0	0.0418879
CSS0040225	0	0.00319966	0.00326706	0.00141829	0	0	0	0	0.00788501
CSS0025760	0	0	0	0	0	0	0	0	0
CSS0047322	0.0487153	0.0400766	0.0653367	0.0478216	0.0114436	0.0387383	0.0667043	0.0983054	0.417142
CSS0000246	0.0482606	0.0193662	0.0639636	0.0439571	0.0333814	0.0229762	0.0628644	0.0171013	0.311871
CSS0027993	0	0	0	0	0	0	0	0	0
CSS0016673	0.0948789	0.0637836	0.120156	0.124682	0.061694	0.0659233	0.10796	0.0943222	0.7334
CSS0033258	0	0	0	0	0	0	0	0	0
CSS0043711	0	0	0	0	0	0	0	0	0
CSS0006864	0	0	0.00250485	0	0.00373157	0	0	0	0.00623642
CSS0026746	0.00358749	0.00465811	0.0151921	0.000940699	0	0.00902071	0	0.0088061	0.0422052
CSS0050472	0	0	0	0	0	0	0	0	0
CSS0019450	0	0	0	0	0	0	0	0	0
CSS0017692	0.00495038	0.0113585	0.00444146	0.00888959	0.026287	0	0.0114715	0.00769985	0.0750984
CSS0037701	0.00491688	0.00279056	0.0169296	0.00687414	0.0058377	0.00439725	0.00426171	0.0270898	0.0730976
CSS0028910	0.0217827	0.0562654	0.0622311	0.0721873	0.0581845	0.0590704	0.0386187	0.0408644	0.409204
CSS0010374	0	0	0	0	0	0	0	0	0
CSS0043967	0.00587327	0.0137286	0.0363563	0.0500213	0.00819454	0.0297742	0.0110177	0.0252956	0.180262
CSS0026127	0.00647053	0.00739916	0.00542964	0.0102245	0.00199541	0.00953208	0.0134548	0.0158225	0.0703285
CSS0050516	0.00158629	0.00382184	0.00196082	0.00293879	0	0	0	0	0.0103077
CSS0039516	0	0	0	0	0	0	0	0	0
CSS0032492	0	0	0	0	0	0	0	0	0
CSS0010994	0.0104096	0.0184545	0.00685407	0.0143606	0.00802101	0.00943017	0	0.00945704	0.076987
CSS0019082	0.001193	0	0.00261764	0	0	0.00294911	0	0	0.00675974
CSS0020467	0	0	0	0.00189861	0	0	0	0	0.00189861
CSS0047233	0.00124413	0	0.000858591	0.000868937	0	0	0	0.0101124	0.0130841
CSS0041857	0.0223695	0.0138668	0.0472451	0.0356052	0.0158773	0.0273081	0.0312195	0.0424654	0.235957
CSS0017992	0	0	0	0	0	0	0	0	0
CSS0014902	0	0	0	0	0	0	0	0	0
CSS0003168	0.08322	0.192946	0.155832	0.282029	0.197833	0.279651	0.140474	0.273274	1.60526
CSS0013012	0.022063	0.0567745	0.0231452	0.0359158	0.0282272	0.0169475	0.0188536	0.0522209	0.254148
CSS0019567	0.0689145	0.0762107	0.100637	0.116652	0.0311059	0.139999	0.0461701	0.144375	0.724064
CSS0040092	0	0	0	0	0	0	0	0	0
CSS0030245	0	0	0	0	0	0	0	0	0
CSS0040010	0.0391332	0.0345305	0.0563315	0.0799308	0.0448743	0.0453862	0.0451922	0.0520429	0.397422
CSS0028612	0	0	0	0.00376899	0	0	0.00851529	0	0.0122843
CSS0021534	0.00213319	0.00616141	0.0013325	0	0.00645096	0	0	0	0.0160781
CSS0040445	0	0	0	0	0	0	0	0	0
CSS0029899	0	0	0	0	0	0	0	0	0
CSS0042050	0	0	0	0	0	0	0	0	0
CSS0049406	0.0163321	0.0251301	0.0230632	0.0154208	0.0369213	0	0.118485	0.0317381	0.267091
CSS0036351	0.056592	0.0236148	0.0458608	0.0587753	0.0502542	0.0331805	0.0850548	0.0830511	0.436383
CSS0045417	0.00600447	0.00355917	0.0132308	0.00984275	0.00927448	0.0114058	0	0.0197892	0.0731066
CSS0009660	0.0134995	0.0335496	0.116369	0.00491706	0.0499297	0.00972173	0.00667947	0.0258718	0.260538
CSS0014447	0.0171556	0.0165183	0.0883607	0.0283768	0.0356246	0.0427796	0.00426171	0.0567807	0.289858
CSS0002693	0.00245559	0.00146538	0.00406131	0.00207202	0	0.00528749	0.00672827	0	0.02207
CSS0041014	0.0420821	0.0125754	0.0860734	0.0132192	0.0185092	0.0820099	0.0488033	0.116119	0.419391
CSS0012201	0.00187456	0.00548542	0.014955	0.0171641	0	0.00290716	0	0	0.0423862
CSS0032920	0.00100936	0.005716	0	0.00285561	0	0	0	0.0061351	0.0157161
CSS0039547	0	0.00103397	0	0	0	0	0	0	0.00103397
CSS0048174	0	0	0	0	0	0	0	0	0
CSS0005004	0	0	0	0	0	0	0	0	0
CSS0008191	0.00775331	0.0165866	0.00288053	0.0244754	0.0391145	0.0200686	0.0619758	0.0470407	0.219895
CSS0025505	0.0365568	0.0130848	0.0111499	0.0305937	0.0170875	0.0468155	0.0436577	0.0533574	0.252303
CSS0019421	0.000866222	0	0	0	0.00365409	0	0	0	0.00452032
CSS0048453	0.054696	0.118559	0.078465	0.168795	0.147383	0.122841	0.0540482	0.237198	0.981985
CSS0018774	0.00183425	0.00211259	0.002376	0.00741113	0	0.00680307	0	0.0139856	0.0345226
CSS0038783	0.0363394	0.035589	0.0339889	0.090935	0.0951208	0.0635511	0.0442016	0.103413	0.503139
CSS0020776	0.139137	0.0538051	0.0927903	0.151363	0.138335	0.121235	0.0920407	0.264421	1.05313
CSS0011254	0.00219566	0.0029988	0	0.000985876	0	0.00538979	0	0	0.0115701
CSS0021401	0	0.000896097	0.00157614	0	0	0.00406056	0	0	0.0065328
CSS0009141	0.0345167	0.0876767	0.0420169	0.0689406	0.0467984	0.0745967	0.0535553	0.0371672	0.445269
CSS0023256	0.00223306	0	0.00113615	0.00205919	0.00320972	0.0101461	0.00491311	0	0.0236973
CSS0046329	0.0022953	0.00238353	0.0054868	0.00646657	0	0.00422306	0.0191424	0.0115406	0.0515383
CSS0040311	0.01921	0.0373183	0.0299448	0.0705131	0.0406295	0.0301078	0.0297318	0.0464416	0.303897
CSS0005356	0	0	0	0	0	0	0	0	0
CSS0047954	0	0	0	0	0	0	0	0	0
CSS0006098	0.030084	0.0244773	0.0424418	0.0552197	0.0257794	0.0410125	0.01575	0.0709622	0.305727
CSS0031665	0	0	0	0	0	0	0	0	0
CSS0009421	0	0	0	0.000754221	0	0	0	0	0.000754221
CSS0000347	0.0381792	0.0386096	0.0190666	0.101729	0.074591	0.0422089	0.0666948	0.0593221	0.440401
CSS0036050	0	0	0	0	0	0	0	0	0
CSS0024730	0	0	0	0	0	0	0	0	0
CSS0002369	0.0160654	0.0275956	0.0788185	0.0153854	0.0134014	0.0225325	0.0366851	0.0419469	0.252431
CSS0043284	0	0	0	0	0	0	0	0	0
CSS0003658	0	0	0.00130821	0	0	0	0	0	0.00130821
CSS0031698	0.00744843	0.00659087	0.031152	0.0288425	0.00867281	0.00453252	0.0225384	0	0.109778
CSS0047319	0.0546643	0.0321427	0.0380116	0.0670416	0.0865776	0.0598338	0.0603731	0.061817	0.460462
CSS0017267	0.0744101	0.210486	0.194246	0.485638	0.247812	0.434956	0.283023	0.0906272	2.0212
CSS0019699	0.0321264	0.0760933	0.084707	0.0803219	0.0491637	0.0631105	0.0602424	0.102575	0.54834
CSS0030175	0	0	0	0	0	0	0	0	0
CSS0021743	0.00310189	0.00892081	0.00487888	0.0123986	0	0	0	0.00942876	0.0387289
CSS0027078	0.0170641	0.0502743	0.0351612	0.10823	0.0590643	0.0767533	0.0494252	0.043136	0.439108
CSS0046087	0.640484	0.277312	0.538078	0.576384	0.397056	0.379213	0.594954	0.708634	4.11211
CSS0030813	0	0	0	0	0	0	0	0	0
CSS0018656	0.136772	0.0453986	0.123046	0.0854955	0.0516529	0.0947556	0.0931226	0.0880491	0.718292
CSS0000600	0.00191847	0.00117531	0.00511637	0	0	0.00284275	0.00843044	0	0.0194833
CSS0030500	0.00189043	0.00205837	0.0101222	0.00142585	0	0.0120911	0.0122915	0.00415581	0.0440352
CSS0019201	0.0197685	0.0110262	0.0427596	0.0151991	0.00824332	0.0148262	0.00576573	0.0401519	0.157741
CSS0046133	0	0	0	0	0	0	0	0	0
CSS0042771	0	0	0	0	0	0	0	0	0
CSS0042486	0	0	0	0	0	0	0	0	0
CSS0015971	0.0708836	0.206465	0.103363	0.179349	0.155916	0.154354	0.148241	0.23291	1.25148
CSS0042658	0.00636323	0.0145008	0.00892147	0.0514721	0.0430108	0.025527	0.00443708	0	0.154233
CSS0004742	0.00130199	0.00212872	0.0113325	0.00593545	0.00185176	0.00884495	0.0109367	0	0.0423321
CSS0026153	0.0554779	0.0660892	0.107827	0.159893	0.134779	0.0617541	0.182797	0.100483	0.8691
CSS0024070	0	0	0	0	0	0	0	0	0
CSS0036164	0.00174475	0.00204713	0	0	0	0.0032591	0	0	0.00705098
CSS0014372	0.000862095	0.000879358	0	0.00323133	0	0	0	0	0.00497278
CSS0000390	0.686191	1.2155	1.09571	1.99293	1.23477	1.03476	1.29227	1.21605	9.76818
CSS0021223	0.150964	0.199291	0.238833	0.507556	0.163819	0.299046	0.243001	0.329117	2.13163
CSS0004826	0.00356685	0.0169684	0.0144531	0.0315993	0.011068	0.0241196	0.0245111	0.0340672	0.160353
CSS0016169	0.0550491	0.0302648	0.0687254	0.0341279	0.0342334	0.0313923	0.0732487	0.104802	0.431844
CSS0038037	0	0	0	0	0	0	0	0	0
CSS0043048	0.0060452	0.00617917	0.0300122	0.013413	0.0083091	0.00987988	0.0218046	0.0151513	0.110794
CSS0042461	0.627562	0.527047	0.520438	0.729301	1.44268	0.654555	0.627055	0.593561	5.7222
CSS0019745	0.00084705	0	0.00247614	0.00860138	0.00446433	0.00513008	0.0105605	0	0.0320795
CSS0048179	0	0	0	0	0	0	0	0	0
CSS0015977	0.0134017	0.0298984	0.0270306	0.0481801	0.00920117	0.0255702	0.010446	0.0405315	0.20426
CSS0008531	0.0446628	0.075343	0.0981188	0.0952304	0.0674097	0.0984369	0.0543025	0.0885761	0.62208
CSS0022007	0.00593464	0.00826337	0.00977415	0.00521086	0.0166533	0.0067347	0	0	0.052571
CSS0046155	0	0	0	0	0	0	0	0	0
CSS0036524	0.0019245	0.00556585	0.00371632	0.00305815	0	0.00230864	0.0138861	0.00788835	0.0383479
CSS0035906	0.135779	0.0546747	0.122873	0.11913	0.103917	0.109632	0.135054	0.0889442	0.870003
CSS0000046	0.0162326	0.0279702	0.0198779	0.0374426	0.0214311	0.011641	0.00494178	0.0218003	0.161337
CSS0024140	0.00166904	0.0195265	0.0149161	0.00533559	0	0.0101989	0	0.0705343	0.122181
CSS0031807	0.0135636	0.0137597	0.0181027	0.0261527	0.0216986	0.00693078	0.00527054	0.0618305	0.167309
CSS0002854	0.00287137	0	0.0047338	0.00434536	0.00675835	0.00488848	0	0.0126404	0.0362377
CSS0025388	0.880786	0.544119	0.466938	0.687581	0.680228	0.771199	0.518946	1.11737	5.66717
CSS0019329	0.000863464	0	0	0	0	0	0	0	0.000863464
CSS0042515	0.0673888	0.161531	0.0915922	0.193334	0.246503	0.0956309	0.21687	0.0576656	1.13051
CSS0049145	0.107086	0.0455733	0.120792	0.0824555	0.0139376	0.066808	0.238619	0.0871818	0.762453
CSS0011702	0	0	0	0	0	0	0	0	0
CSS0000591	0	0	0	0	0	0	0	0	0
CSS0012192	0.00193538	0	0.00161634	0.00208686	0	0	0	0.00881509	0.0144537
CSS0024740	0	0	0	0	0	0	0	0	0
CSS0027299	0	0	0	0	0	0	0	0	0
CSS0047429	0	0	0	0	0	0	0	0	0
CSS0009341	0	0	0	0	0	0	0	0	0
CSS0034078	0	0	0	0	0	0	0	0	0
CSS0007023	0	0	0	0	0	0	0	0	0
CSS0031462	0	0	0	0	0	0	0	0	0
CSS0001235	0	0	0	0	0	0	0	0	0
CSS0040652	0.0447391	0.0540658	0.184233	0.0886605	0.0426554	0.106421	0.0510046	0.0361325	0.607912
CSS0018653	1.33341	2.03237	2.52529	2.3525	1.86846	2.89392	2.09067	2.65216	17.7488
CSS0011843	0	0	0	0	0	0	0.0113109	0	0.0113109
CSS0010618	0.00204184	0.00545068	0.00146701	0.0175128	0	0.00513008	0.016892	0.0252763	0.0737708
CSS0003146	0.0465803	0.125418	0.0990446	0.259674	0.196687	0.19683	0.264346	0.109654	1.29823
CSS0018793	0	0	0	0	0	0	0	0	0
CSS0019430	0	0	0	0	0	0	0	0	0
CSS0037953	0.00428025	0.00942461	0.00919993	0.00930044	0.0441966	0.00291064	0.052237	0	0.131549
CSS0017247	0.050585	0.137651	0.0559086	0.325582	0.285217	0.382898	0.266925	0.50898	2.01375
CSS0038928	0	0	0	0	0	0	0	0	0
CSS0035747	0	0	0	0	0	0	0	0	0
CSS0029090	0	0	0	0	0	0	0	0	0
CSS0036357	0	0	0	0	0	0	0	0	0
CSS0018661	0.0984213	0.0819014	0.141941	0.190629	0.0696049	0.112684	0.186728	0.202726	1.08463
CSS0018512	0.0742825	0.114435	0.0658436	0.161532	0.244584	0.0457719	0.0835799	0.0706933	0.860722
CSS0023400	0.0287905	0.027311	0.0581047	0.0496104	0.0739156	0.0369994	0.0175953	0.225912	0.518239
CSS0020270	0.00905218	0.0115852	0.00287106	0.00262416	0	0.0109908	0.00411354	0.00446829	0.0457052
CSS0037407	0.0268399	0.0239131	0.0643013	0.0333217	0.0161531	0.0386993	0.026608	0.0912637	0.3211
CSS0041204	0.00133209	0	0.0022299	0.000738165	0.00429806	0	0.00658297	0	0.0151812
CSS0037058	0.000322971	0.0106317	0.00737776	0.0172769	0.0156893	0.0186602	0.023721	0.00431694	0.0979969
CSS0007857	0.00276379	0.00361864	0.00247138	0.0112454	0.00747659	0	0.00637211	0.00447617	0.0384241
CSS0020373	1.8318	1.05004	1.96742	1.3544	1.37765	1.49521	2.00202	1.59419	12.6727
CSS0043084	0.244208	0.131548	0.386502	0.293432	0.118425	0.300771	0.241944	0.470698	2.18753
CSS0045683	0.0498809	0.0202268	0.080526	0.0514815	0.020776	0.0430348	0.0653973	0.110444	0.441767
CSS0040583	0.0032242	0.00617471	0.00443584	0.0076468	0	0.00260669	0	0.0207385	0.0448267
CSS0010319	0.0537546	0.123264	0.0681172	0.187285	0.105303	0.0969164	0.108606	0.229891	0.973138
CSS0007941	0	0.000911256	0	0.00425324	0	0.00298455	0	0	0.00814905
CSS0042327	0.00397052	0.000964081	0.00199358	0.00107978	0	0.00358249	0.00934467	0.0084449	0.02938
CSS0019976	0.010563	0.00870118	0.048779	0.0163844	0.0105878	0.0432799	0.0224197	0.0250543	0.185769
CSS0032139	0.0153104	0.0141413	0.0215653	0.0216294	0.0145212	0.0150358	0.0201903	0.0493296	0.171723
CSS0001413	0	0	0	0	0	0	0	0	0
CSS0019305	0	0	0	0	0	0	0	0	0
CSS0013409	0	0.000950403	0.00720818	0.00408462	0.00393993	0.00256307	0	0	0.0187462
CSS0017369	0.184517	0.0735123	0.167952	0.16996	0.0940009	0.138913	0.213339	0.14956	1.19175
CSS0004294	0.0792198	0.0746893	0.0784775	0.117513	0.108274	0.0878669	0.0828402	0.246989	0.875869
CSS0012733	0.00447084	0.00587376	0.0067528	0.00136512	0	0.00430711	0	0	0.0227696
CSS0008746	0	0	0.00110428	0	0	0	0	0	0.00110428
CSS0047000	0.14471	0.381922	0.560026	0.679665	0.29987	0.62699	0.44086	0.538418	3.67246
CSS0042521	0	0	0	0	0	0	0	0	0
CSS0020268	0.00662841	0.00528974	0.0113505	0.00314477	0.00485961	0.00437631	0.00685181	0.0177357	0.0602369
CSS0043092	0.00685028	0.00367246	0.00853707	0.0120727	0.0247774	0.013159	0.00685181	0.00902492	0.0849457
CSS0002777	0	0	0	0	0	0	0	0	0
CSS0035590	0.00366551	0.00651246	0.0066464	0.018791	0.0021459	0.011896	0.0122993	0.00514128	0.0670978
CSS0043240	0.00538555	0.00881452	0.00972873	0.00863226	0.00309101	0.0203343	0.00839886	0.00978323	0.0741685
CSS0023900	0	0	0	0	0	0	0	0	0
CSS0041552	0	0	0	0	0	0	0	0	0
CSS0016735	0	0	0	0	0	0	0	0	0
CSS0039054	0.000730575	0.00248711	0.0045807	0.00739263	0.00421583	0	0	0.00442047	0.0238273
CSS0043255	0.00334508	0.00250479	0.00772281	0.00591486	0.00490184	0.00403803	0.00665927	0	0.0350867
CSS0031664	0	0	0	0	0	0	0	0	0
CSS0042935	0	0	0	0	0	0	0	0	0
CSS0036343	0	0.00254062	0.0031833	0.00147103	0	0	0	0.00423468	0.0114296
CSS0025701	0	0	0	0	0	0	0	0	0
CSS0019529	0.00179571	0	0.00225344	0	0	0.00279828	0	0.00417912	0.0110266
CSS0044265	0	0	0	0	0	0	0	0	0
CSS0041660	0	0	0	0	0	0	0	0	0
CSS0040781	0	0	0	0	0.00451237	0	0	0.00538343	0.0098958
CSS0018557	0	0	0	0	0	0	0	0	0
CSS0033640	0.0246989	0.0122349	0.0393654	0.0252214	0.00339718	0.0263833	0.0487578	0.100503	0.280562
CSS0007728	0.0166062	0	0.011213	0.0102897	0.0077756	0.0102208	0.0329583	0.0153697	0.104433
CSS0049537	0	0.00207327	0.00385779	0.00161309	0.00370339	0.00353794	0	0.00838462	0.0231701
CSS0013546	0.0695619	0.076992	0.12601	0.134736	0.0730541	0.0998034	0.0163008	0.201328	0.797787
CSS0002569	0.0485885	0.0226695	0.0525801	0.0505959	0.035747	0.025364	0.0906278	0.0609914	0.387164
CSS0028733	0.00159615	0	0	0.00237275	0	0	0	0	0.00396891
CSS0005230	0.00445625	0.00461142	0.00767503	0.0118831	0.00787754	0.00699609	0.00687352	0.0183086	0.0686816
CSS0012131	0	0.0010654	0.0025142	0	0	0	0.0101974	0.00690897	0.0206859
CSS0048341	0.00731932	0.0142768	0.00971001	0.0106951	0.0046816	0.00916163	0.0105889	0	0.0664333
CSS0026019	0.0105392	0.00756762	0.0238672	0.00868042	0.00467724	0.00567647	0.0264475	0.00440283	0.0918584
CSS0042922	0	0	0	0.000780572	0	0.00338185	0.0247575	0	0.02892
CSS0018770	0	0	0	0.000762171	0	0	0	0	0.000762171
CSS0019990	0.00211205	0.00352249	0.00136886	0.00401531	0	0	0.00802114	0.00484161	0.0238815
CSS0046606	0	0	0	0	0	0	0	0	0
CSS0047983	0.00471878	0.00205278	0.023514	0.00880737	0.00606656	0.00814397	0.0261724	0.00473351	0.0842093
CSS0012264	0	0	0	0	0	0	0	0	0
CSS0017304	0	0	0	0	0	0	0	0	0
CSS0024232	0	0	0	0	0	0	0	0	0
CSS0013536	0	0	0	0	0	0	0	0	0
CSS0047674	0	0	0	0	0	0	0	0	0
CSS0042294	0	0	0	0	0	0	0	0	0
CSS0032149	0	0	0	0	0	0	0	0	0
CSS0046420	0	0	0	0.00294534	0	0	0	0	0.00294534
CSS0001174	0	0	0	0	0	0	0	0	0
CSS0026979	0.0106149	0.0290773	0.0123512	0.0344699	0.0402237	0.0276183	0.0150367	0.0091238	0.178516
CSS0034781	0.00670732	0.00697713	0.000766526	0.00378626	0.00372815	0.00330621	0	0.00651615	0.0317878
CSS0050415	0	0	0	0.000962009	0	0	0	0	0.000962009
CSS0021287	0	0	0.00234527	0	0	0	0	0	0.00234527
CSS0034687	0	0	0	0.00100586	0	0	0	0	0.00100586
CSS0032256	1.92626	2.1816	3.75783	2.74663	2.30746	3.67926	1.81853	2.72193	21.1395
CSS0030646	0.22963	0.264343	0.412459	0.505322	0.255527	0.906364	0.197235	0.71064	3.48152
CSS0001680	0.00519037	0.00675878	0.00774976	0.0125862	0	0.00315562	0.00424167	0	0.0396824
CSS0034429	0.622422	0.636531	1.82227	0.925586	0.645732	1.89912	0.794107	1.59328	8.93904
CSS0026433	2.01757	2.26308	3.04743	2.69081	2.6254	3.37353	1.95212	2.68478	20.6547
CSS0037572	0	0	0.0015502	0	0	0	0	0	0.0015502
CSS0025939	0	0	0	0	0	0	0	0	0
CSS0012411	0	0	0	0	0	0	0	0	0
CSS0027184	0	0	0	0	0	0	0	0	0
CSS0022321	0.00985783	0.0068837	0.0111306	0.0280723	0.00826193	0.0512897	0	0.0126193	0.128115
CSS0024647	0.085046	0.0350317	0.112037	0.109713	0.0917161	0.0907996	0.188824	0.0974537	0.810621
CSS0004747	0.0529948	0.0553007	0.102818	0.151112	0.0638568	0.0835327	0.039652	0.0452374	0.594504
CSS0025342	0	0	0	0	0	0	0	0	0
CSS0033072	0	0	0	0	0	0	0	0	0
CSS0036258	0.101437	0.0243047	0.149556	0.0831814	0.0413901	0.0581921	0.0381149	0.0701316	0.566308
CSS0036026	0.0468204	0.114273	0.0763004	0.21264	0.307751	0.0711739	0.0822171	0.0782616	0.989437
CSS0011130	0	0	0	0	0	0	0	0	0
CSS0031694	0	0	0	0	0	0	0	0	0
CSS0022028	0.0320545	0.0121994	0.0277144	0.0231469	0.0337189	0.0482452	0.0361786	0.00864265	0.221901
CSS0021482	0.0118897	0.0440804	0.0238248	0.0416076	0.0383247	0.0433241	0.110314	0.0105781	0.323943
CSS0048931	0.159321	0.0587344	0.108695	0.090533	0.0705062	0.0829602	0.172308	0.0891977	0.832255
CSS0021506	0.887015	1.14174	0.399443	1.21815	1.10625	2.51793	0.598592	1.755	9.62412
CSS0010099	0.0344214	0.0125893	0.0542282	0.0682374	0.0122307	0.0228543	0.0671108	0.0671777	0.33885
CSS0016003	0.00930938	0.00708091	0.00471881	0.0111741	0.00709937	0.00296254	0.0158855	0.0362743	0.094505
CSS0035226	0.611788	0.69199	0.976987	0.559062	0.59614	2.09859	0.412962	1.2643	7.21181
CSS0038847	0.439977	0.346691	0.578904	0.736274	0.788944	0.433645	0.977051	0.520922	4.82241
CSS0042331	0	0	0.000711204	0	0	0	0	0	0.000711204
CSS0037623	0	0.000901075	0.00769076	0.0107991	0.0123429	0.00710726	0.00397531	0.0173429	0.0601593
CSS0043973	0	0	0	0	0	0	0	0	0
CSS0029507	0.0107596	0.00328051	0.00865879	0.0156101	0.00787713	0.0112595	0.0113179	0.00588508	0.0746486
CSS0031099	0.00795114	0.00104099	0.0069276	0.00114766	0	0	0.0049894	0	0.0220568
CSS0012253	0.0277486	0.00560452	0.034206	0.0168999	0.00934126	0.026201	0	0.0166994	0.136701
CSS0010540	0.0308369	0.0412208	0.0420997	0.108852	0.0621539	0.0707435	0.0570835	0.0391925	0.452183
CSS0038355	0	0	0	0	0	0	0	0	0
CSS0030450	0	0	0	0	0	0	0	0	0
CSS0014435	0	0	0	0	0	0	0	0	0
CSS0009728	0.0203223	0.0221952	0.0814551	0.0420845	0.013574	0.0273018	0.0388143	0.0482887	0.294036
CSS0041794	0	0	0	0	0	0	0	0	0
CSS0012310	0	0	0	0	0	0	0	0	0
CSS0015036	0.00502004	0.0052783	0.00513813	0.00207643	0.00384293	0.00595118	0	0.00447011	0.0317771
CSS0031201	0.0735847	0.0159929	0.0788559	0.0163632	0.0102014	0.0340967	0.0700172	0.00818935	0.307301
CSS0021356	0.0884548	0.0484325	0.093336	0.0956567	0.018501	0.131163	0.124967	0.0938349	0.694346
CSS0000698	0.0638163	0.0577543	0.0813405	0.0838356	0.0748471	0.0636664	0.128289	0.100952	0.654502
CSS0010066	0.0113108	0.00427033	0.00818912	0.00859211	0	0.0155791	0.00831739	0.010387	0.0666459
CSS0048432	0	0	0	0	0	0	0	0	0
CSS0010196	0.394783	0.135966	0.348299	0.227494	0.275893	0.2251	0.371068	0.229636	2.20824
CSS0037648	0.0441255	0.0110259	0.0285051	0.0389872	0.00765405	0.0367336	0	0.0230557	0.190087
CSS0033988	0.185148	0.169165	0.230929	0.332379	0.335341	0.228914	0.368379	0.267552	2.11781
CSS0035102	0.00035815	0	0.0023101	0.00204521	0	0	0	0	0.00471347
CSS0043457	0.179648	0.0840378	0.175942	0.165544	0.164376	0.103424	0.212776	0.22989	1.31564
CSS0005121	0.000688714	0	0	0.00115338	0	0	0	0	0.0018421
CSS0010483	0	0	0.00122342	0	0	0	0	0	0.00122342
CSS0032602	0.0222629	0.0153126	0.0346448	0.0126422	0.0108085	0.0635285	0	0.0343052	0.193505
CSS0001271	0	0.00124515	0.00158163	0.000949514	0	0.00370701	0	0.00798117	0.0154645
CSS0048419	0	0	0	0	0	0	0	0	0
CSS0001927	0	0	0	0	0	0	0	0	0
CSS0048607	0.00168711	0	0.00108237	0.000829443	0	0	0	0	0.00359892
CSS0031370	0	0	0	0	0	0	0	0	0
CSS0045207	0	0	0	0	0	0	0	0	0
CSS0029315	0	0	0	0	0	0	0	0	0
CSS0020866	0.000661335	0.0104877	0.000821736	0.000971878	0	0.00582166	0	0.0148934	0.0336577
CSS0038316	0	0.000969513	0	0	0	0	0	0	0.000969513
CSS0047177	0	0	0	0	0	0	0	0	0
CSS0036710	0.00658511	0.0101102	0.0199663	0.0152397	0.0123222	0	0.0185475	0.0109148	0.0936858
CSS0012711	0	0	0	0	0	0	0	0	0
CSS0027741	0	0	0	0	0	0	0	0	0
CSS0028641	0.232302	0.126037	0.157077	0.235371	0.28089	0.124906	0.251654	0.219902	1.62814
CSS0031125	0.00200356	0	0.00329585	0.000952916	0	0	0.00424815	0	0.0105005
CSS0029716	0	0	0	0	0	0	0	0	0
CSS0028164	0.0126837	0.0146893	0.020928	0.00815757	0.00510315	0.00917806	0.0507916	0.0511686	0.1727
CSS0025442	0.0151266	0.00185175	0.0165817	0	0	0	0	0.0177904	0.0513505
CSS0008024	0.00995188	0.0152266	0.019329	0.0249441	0.0110734	0.0174562	0.0221475	0.0113138	0.131442
CSS0007250	0.100517	0.0451483	0.137604	0.107701	0.0938108	0.0978273	0.109762	0.101381	0.793752
CSS0031851	0	0	0.000804448	0.00204331	0.00522517	0	0	0	0.00807293
CSS0009607	0	0.00199567	0.00285985	0.00198272	0	0.0155026	0	0.00447617	0.026817
CSS0010988	0.00312304	0.00521736	0.0170731	0.00194275	0.0100423	0.00791773	0	0	0.0453163
CSS0018933	0.274905	0.251461	0.225514	0.402686	0.920009	0.30644	0.328474	0.36853	3.07802
CSS0003903	0.0118147	0.00188137	0.0132205	0	0	0.0108179	0.00505641	0.0220986	0.0648894
CSS0016976	0.0583049	0.186232	0.0507095	0.222821	0.404923	0.112578	0.120526	0.131954	1.28805
CSS0029266	0.233896	0.134168	0.254768	0.324595	0.162484	0.313905	0.0829846	0.0652164	1.57202
CSS0007734	0	0.001009	0.00146818	0	0	0	0	0	0.00247718
CSS0010972	0.130806	0.456022	0.291147	0.668353	0.272712	0.296253	0.425338	0.443549	2.98418
CSS0027339	0.0467628	0.0772922	0.049359	0.0986597	0.114162	0.069186	0.0946979	0.222029	0.772149
CSS0025558	0.013044	0.031594	0.0146818	0.0247782	0.0166601	0.00866311	0.00931956	0.0184757	0.137217
CSS0014178	0	0	0	0	0	0	0	0	0
CSS0041864	0.000787499	0.000916187	0.0020969	0.00295363	0.00399927	0.00276641	0.0105889	0.0154505	0.0395593
CSS0039445	0.0434326	0.0211285	0.0376686	0.0216081	0.00514742	0.0103281	0.0311591	0.0496874	0.22016
CSS0019497	0	0.00249775	0.0163651	0.0110849	0	0	0	0	0.0299478
CSS0018798	0	0	0	0	0	0	0	0	0
CSS0019139	0	0	0	0	0	0	0	0	0
CSS0002000	0	0	0.00131386	0	0	0	0.00858432	0	0.00989818
CSS0002446	0.10648	0.273027	0.11435	0.359925	0.432084	0.163031	0.249136	0.201665	1.8997
CSS0007956	0.00983446	0.0133557	0.0119591	0.0135718	0.00753932	0.0223465	0.00742505	0.0321638	0.118196
CSS0001440	0.00608512	0.0123967	0.00531453	0.0180135	0.0249774	0.00544158	0.00602866	0.00890407	0.0871615
CSS0043981	0	0	0	0	0	0	0	0	0
CSS0020537	0	0	0	0	0	0	0	0	0
CSS0044969	0	0	0.00151749	0.00103491	0	0	0.00698302	0	0.00953542
CSS0029859	0.00252236	0	0.0069948	0.000773958	0	0.00357429	0.00711169	0	0.0209771
CSS0036839	0.00695646	0.0239294	0.0873432	0.00840983	0.0152685	0.0199785	0.060788	0.0127951	0.235469
CSS0047942	0.00758221	0.00562409	0.0132456	0.00568601	0.00395854	0.00762793	0	0	0.0437244
CSS0047961	0	0	0.000761772	0.00306627	0	0	0	0	0.00382805
CSS0027344	0	0	0	0	0	0	0	0	0
CSS0044171	0	0	0.00113283	0	0	0	0	0	0.00113283
CSS0003100	0.10186	0.198695	0.275259	0.381662	0.0601974	0.190087	0.183858	0.154958	1.54657
CSS0050217	0	0.00249743	0	0	0.00262493	0	0	0	0.00512236
CSS0039595	0.00447741	0.00252078	0.00485393	0.00166175	0.00408292	0.00499792	0	0.00514461	0.0277393
CSS0039953	0.0308207	0.0226059	0.0403561	0.0332228	0.0235476	0.0306645	0.055262	0.147453	0.383933
CSS0022994	0.00153206	0.00197415	0.000862845	0.0019998	0	0.0161119	0	0	0.0224808
CSS0026053	0	0	0	0	0	0	0	0	0
CSS0006576	0	0	0	0	0	0	0	0	0
CSS0045227	0	0	0	0	0	0	0	0	0
CSS0006778	0	0	0	0	0	0	0	0	0
CSS0005565	0.00360784	0	0.00177956	0.00479318	0	0	0	0	0.0101806
CSS0032172	0	0	0	0	0	0	0	0	0
CSS0045603	0.0506467	0.166431	0.0605113	0.244182	0.137154	0.116585	0.298558	0.306304	1.38037
CSS0048497	0	0	0	0	0	0	0	0	0
CSS0009729	0	0	0	0	0	0	0	0	0
CSS0010676	0.0108279	0.0121248	0.0110436	0.0136316	0.00942686	0.00893908	0	0.0153964	0.0813903
CSS0003961	0	0.00113464	0	0	0	0	0	0	0.00113464
CSS0049318	0	0	0	0	0	0	0	0	0
CSS0019013	0.00130892	0.00154164	0.00446239	0.00209591	0	0.00704561	0.00465844	0.00425194	0.0253649
CSS0048212	0.00281179	0.00109886	0.000965447	0	0	0	0.00449141	0	0.00936751
CSS0047272	0.0182684	0.00368992	0.0173667	0.0107408	0.00354357	0.0143368	0	0	0.0679462
CSS0025020	0.0230765	0.0133457	0.0296962	0.0524218	0.0233119	0.0561808	0.0572816	0.0259889	0.281303
CSS0044001	0	0	0	0	0	0	0	0	0
CSS0010594	0.0115806	0.0489365	0.0962844	0.121097	0.03433	0.08456	0.123173	0.08326	0.603221
CSS0001349	0	0	0	0	0	0	0	0	0
CSS0010105	0	0	0	0	0	0	0	0	0
CSS0035921	0.0347486	0.0974644	0.019722	0.0217319	0.0206102	0.0182213	0.0142819	0.00387667	0.230657
CSS0038991	0	0	0	0	0	0	0	0	0
CSS0003841	0	0	0	0	0	0	0	0	0
CSS0028673	0	0	0	0	0	0	0	0	0
CSS0016448	0	0	0	0	0	0.00269755	0	0	0.00269755
CSS0004531	0	0	0	0	0	0	0	0	0
CSS0023489	0	0	0	0	0	0	0	0	0
CSS0008162	0.00386446	0.00290069	0.00474528	0.00209657	0	0.00651063	0.00811053	0	0.0282282
CSS0040271	0	0	0	0	0	0	0	0	0
CSS0023990	0.0231802	0.00839049	0.0569599	0.00108198	0.00304909	0.0756449	0.00886383	0.0265322	0.203703
CSS0005768	0	0	0	0	0	0	0	0	0
CSS0042060	0	0	0	0	0	0	0	0	0
CSS0029123	2.62003	1.04557	2.58076	1.3074	0.803202	1.78682	1.83691	1.55067	13.5314
CSS0018002	0	0.00287948	0.000740566	0	0	0	0	0.00533942	0.00895947
CSS0016786	0	0	0	0	0	0	0	0	0
CSS0002812	0.0687783	0.0365835	0.10175	0.0731875	0.0295126	0.0855138	0.0448	0.024916	0.465042
CSS0035168	0.00089804	0	0.00376256	0	0.00431336	0	0	0.00473007	0.013704
CSS0039843	0.0293629	0.0171365	0.0285932	0.0316294	0.0284755	0.0420007	0.11792	0.0287755	0.323894
CSS0048880	0	0	0	0	0	0	0	0	0
CSS0031809	0	0	0	0	0	0	0	0	0
CSS0001713	0	0	0	0	0	0	0	0	0
CSS0020664	0.00151523	0.00305182	0.000795696	0.0047027	0	0.00242365	0.0326683	0.00442047	0.0495779
CSS0025620	0.00579678	0.00219048	0.00957375	0.00398343	0	0.0058125	0.0106642	0.0138912	0.0519123
CSS0041964	0.0375845	0.011705	0.0442394	0.0193241	0.0160261	0.0307976	0.1187	0.0188507	0.297228
CSS0002935	0.038096	0.0335443	0.0569694	0.0561078	0.0179071	0.0622481	0.0265641	0.0480668	0.339503
CSS0034255	0.000804922	0	0	0.0021572	0	0	0	0	0.00296212
CSS0026721	0.210049	0.0771934	0.200837	0.157133	0.151509	0.143046	0.166203	0.0303142	1.13628
CSS0034085	0.0395706	0.0343741	0.0606262	0.0542728	0.0262108	0.0268743	0.123104	0.0447991	0.409832
CSS0009982	0.645184	0.219294	0.683399	0.358788	0.342594	0.418936	0.440422	0.39167	3.50029
CSS0029068	0.136648	0.0749689	0.102797	0.136378	0.0608664	0.0829021	0.122547	0.0237877	0.740896
CSS0000283	0	0	0.000621151	0	0	0	0	0	0.000621151
CSS0036246	0	0	0	0	0	0	0	0	0
CSS0007075	0.000459631	0.000871535	0	0.00243881	0	0	0.0087996	0	0.0125696
CSS0016666	0.0430626	0.00921842	0.035451	0.0162996	0.0132749	0.0350658	0.0836461	0.00596526	0.241984
CSS0025630	0	0	0	0	0	0	0	0	0
CSS0008709	0.000751862	0.000735051	0.00218614	0	0	0	0.0105889	0	0.0142619
CSS0035268	0	0	0	0	0	0	0	0	0
CSS0017715	0	0	0	0	0	0	0	0	0
CSS0001194	0.0207992	0.051842	0.0173969	0.0250666	0	0.0195712	0.00989349	0.00442817	0.148998
CSS0022511	0	0	0	0	0	0	0	0	0
CSS0006455	0	0	0	0	0	0	0	0	0
CSS0032322	0	0	0	0	0	0	0	0	0
CSS0020386	0.00391778	0.0016412	0.00132372	0.00470016	0	0.00558803	0	0	0.0171709
CSS0018329	0	0	0	0	0	0	0	0	0
CSS0006166	0.00945586	0.00328691	0.00403189	0.00181153	0	0	0.00705913	0.0142557	0.039901
CSS0019433	0.00434436	0.00455913	0.00306045	0	0.0021459	0.00314122	0	0.00440283	0.0216539
CSS0028331	0.00162319	0.0035127	0.0202329	0.00367443	0	0.0176137	0.00828677	0.0138804	0.0688241
CSS0004576	0	0	0	0	0	0	0	0	0
CSS0012020	0.564038	0.294737	0.626076	0.494651	0.245197	0.596987	0.218852	0.782213	3.82275
CSS0017039	0.000742438	0	0	0	0	0	0	0	0.000742438
CSS0026526	0.000823968	0.000901075	0.0012105	0.00123	0	0	0	0	0.00416553
CSS0039122	0	0	0	0	0	0	0	0	0
CSS0023702	0	0	0	0	0	0	0	0	0
CSS0038315	0	0	0	0	0	0	0	0	0
CSS0006245	0	0	0	0	0	0	0	0	0
CSS0003635	0	0	0	0	0	0	0	0	0
CSS0036286	0.117396	0.0393236	0.179347	0.117174	0.0768724	0.0942184	0.0963658	0.119621	0.840319
CSS0001667	0.0144156	0.00830043	0.0173227	0.014678	0.00311287	0.0210711	0.0118248	0.0216005	0.112326
CSS0023421	0.00738086	0.0130399	0.0188869	0.011219	0.00384293	0.0241839	0.0105324	0.0246938	0.11378
CSS0016245	0.000770516	0	0	0	0	0	0	0	0.000770516
CSS0009268	0.000610362	0	0	0	0	0.00361494	0	0	0.0042253
CSS0010153	0.00436622	0.0102641	0.0121849	0.00604851	0.00228175	0.0145281	0.00557336	0.0486213	0.103868
CSS0017842	0	0.00234772	0.00764525	0.000795254	0	0.00564948	0	0.00391016	0.0203479
CSS0028921	0.00212499	0.00383579	0.00570271	0.00434671	0	0	0	0	0.0160102
CSS0030619	0.00478255	0.028668	0.0151848	0.0183963	0.0110916	0.0202004	0.028896	0.0134819	0.140701
CSS0015885	0.000574254	0.00253411	0	0.00135048	0	0	0	0	0.00445884
CSS0024052	0.000536627	0	0.0011206	0.00107229	0	0	0	0	0.00272951
CSS0018804	0.0366964	0.0201854	0.0401486	0.0228231	0.0115635	0.00668883	0.026246	0.0494737	0.213826
CSS0038446	0.0139831	0.00694566	0.00876293	0.0030189	0.0042729	0.00999001	0	0	0.0469735
CSS0015486	0.000874192	0	0.00073966	0	0	0	0	0	0.00161385
CSS0036715	0.116718	0.112655	0.176998	0.145339	0.123439	0.145016	0.118818	0.292814	1.2318
CSS0008438	0	0.00534283	0.00562997	0.00555822	0.00899546	0	0.00972311	0	0.0352496
CSS0036881	0	0	0	0	0	0	0	0	0
CSS0024387	0.00188727	0.00928553	0.00225539	0.00964278	0.00880543	0.00520039	0.00856722	0	0.045644
CSS0038433	0	0	0	0	0	0.0031323	0	0	0.0031323
CSS0028562	0	0	0	0	0.00276719	0	0	0	0.00276719
CSS0031284	0.00479502	0.0115785	0.00444488	0.00764266	0	0.0115631	0.00787636	0.0164734	0.0643739
CSS0007534	0.0248547	0.0115016	0.0294874	0.0448974	0.0338645	0.0236975	0.0395531	0.0564055	0.264262
CSS0033913	0.00582421	0.0107592	0.00994225	0.00180208	0.00176702	0	0	0.0423129	0.0724077
CSS0047619	0.0187115	0.00109794	0.00379683	0.00231878	0.00596946	0.00526613	0	0.0205184	0.0576791
CSS0042928	0	0	0	0	0	0	0	0	0
CSS0037978	0	0	0.0023301	0	0	0	0	0	0.0023301
CSS0028422	0.0253801	0.014821	0.0160702	0.0225966	0.0329538	0.011785	0.0146062	0.0292267	0.16744
CSS0005651	0	0	0	0	0	0	0	0	0
CSS0010135	0.0179133	0.00220221	0.0105721	0.0143994	0.0103719	0.0139731	0.0206681	0.00516301	0.0952632
CSS0004602	0	0	0	0.00120195	0	0	0	0	0.00120195
CSS0016330	0.0457077	0.0744986	0.0665892	0.0589112	0.0550916	0.0534438	0.0325619	0.0839402	0.470744
CSS0013041	0	0	0	0	0	0	0	0	0
CSS0015203	0	0.000729919	0	0	0	0	0	0	0.000729919
CSS0012358	0.00834755	0.0143988	0.0118903	0.0148936	0.013942	0.00499454	0.0246859	0.0125354	0.105688
CSS0024281	0	0	0	0	0	0	0	0	0
CSS0035505	0	0	0	0	0	0	0	0	0
CSS0015014	0	0	0	0	0	0	0	0	0
CSS0031314	0.0910558	0.0518776	0.0991058	0.0854848	0.0805464	0.0744828	0.0773713	0.142254	0.702178
CSS0037820	0	0.00103941	0	0	0	0.00343493	0	0	0.00447435
CSS0043337	0	0	0.00115168	0	0	0.00236149	0	0	0.00351317
CSS0024629	0.00245048	0	0.00461071	0.00110668	0	0.00239324	0	0	0.0105611
CSS0014066	0	0	0	0	0	0	0	0	0
CSS0017040	0.0445459	0.0065874	0.0379922	0.0177804	0.0115984	0.00882333	0.0163319	0.0458602	0.18952
CSS0007629	0.00217762	0.00695585	0.00184029	0.000843355	0	0.00236926	0	0.0253832	0.0395696
CSS0035894	0	0	0	0	0	0	0	0	0
CSS0036475	0	0	0	0	0	0	0	0	0
CSS0034454	0.992087	0.682013	0.650699	0.871424	1.02455	0.875706	0.322609	0.700363	6.11946
CSS0033865	0.0459478	0.0126156	0.105494	0.0115678	0.012685	0.0419533	0.00900311	0.0620623	0.301329
CSS0022871	0	0	0	0	0	0	0	0	0
CSS0024974	0	0	0	0	0	0	0	0	0
CSS0017229	0	0	0	0	0	0	0	0	0
CSS0043649	0	0	0	0	0	0	0	0	0
CSS0009808	0	0	0	0	0	0	0	0	0
CSS0003259	0	0	0	0	0	0	0	0	0
CSS0016883	0	0	0	0	0	0	0	0	0
CSS0029022	0	0	0	0	0	0	0	0	0
CSS0002710	0	0	0	0	0	0	0	0	0
CSS0022815	0	0	0	0	0	0	0	0	0
CSS0020478	0	0	0	0	0	0	0	0	0
CSS0049020	0	0	0	0	0	0	0	0	0
CSS0009083	0	0	0	0	0	0	0	0	0
CSS0047671	0	0	0	0	0	0	0	0	0
CSS0021320	0	0	0	0	0	0	0	0	0
CSS0026448	0	0	0	0	0	0	0	0	0
CSS0031726	0.0374511	0.00817998	0.0512408	0.0196522	0.0136336	0.0188038	0.0393876	0.0275147	0.215864
CSS0042603	0.00150941	0.00127325	0	0.00109164	0	0	0	0	0.0038743
CSS0032306	0	0	0	0	0	0	0	0	0
CSS0039606	0	0	0	0	0	0	0	0	0
CSS0025744	0	0	0	0	0	0	0	0	0
CSS0011024	0	0	0	0	0	0	0	0	0
CSS0040636	0	0	0	0	0	0	0	0	0
CSS0035471	0	0	0	0	0	0	0	0	0
CSS0034298	0	0	0	0	0	0	0.0052838	0	0.0052838
CSS0033546	0	0	0	0	0	0	0	0	0
CSS0050182	0	0	0	0	0	0	0	0	0
CSS0018714	0.585351	0.197709	0.351014	0.305286	0.288563	0.374433	0.604228	0.301979	3.00856
CSS0037789	0	0	0	0	0	0	0	0	0
CSS0026533	0.000894943	0	0	0.00109491	0.0035818	0	0	0	0.00557165
CSS0024809	0	0	0.00139118	0	0	0	0	0	0.00139118
CSS0028904	0.0177908	0.023588	0.052113	0.041797	0.0404247	0.031692	0.0665383	0.0565518	0.330496
CSS0015362	0	0	0	0	0	0	0	0	0
CSS0044740	0.00600758	0.00450639	0.0298246	0.0157091	0.00450652	0.0144085	0.0305846	0	0.105547
CSS0049311	0	0	0	0	0	0	0	0	0
CSS0037321	0	0	0	0	0	0	0	0	0
CSS0040287	0	0	0	0	0	0	0	0	0
CSS0048190	0	0	0	0	0	0	0	0	0
CSS0036846	0	0	0	0	0	0	0	0	0
CSS0017888	0.00598124	0.0101511	0.0115384	0.0230695	0.00243098	0.0333229	0	0.0400247	0.126519
CSS0005581	0	0	0	0	0	0	0	0	0
CSS0030466	0	0	0.00170519	0.000822491	0	0	0	0	0.00252768
CSS0035725	0.0225319	0.053736	0.0564015	0.148839	0.0455109	0.0892847	0.0735291	0.0549119	0.544745
CSS0015954	0	0	0	0	0	0	0	0	0
CSS0038805	0	0	0	0	0	0	0	0	0
CSS0012618	0	0	0	0	0	0	0	0	0
CSS0022948	0	0	0	0	0	0	0	0	0
CSS0015783	0	0	0	0	0	0	0	0	0
CSS0029534	0.0046281	0.00462555	0.00508994	0.00548733	0.00834306	0	0.0106232	0.00449877	0.0432959
CSS0010849	0.096947	0.228885	0.155912	0.371807	0.52132	0.190612	0.212128	0.350276	2.12789
CSS0040773	0.00137013	0.000863892	0.0250779	0.00330291	0.00450652	0.00534576	0.0143152	0.00684517	0.0616274
CSS0004894	0.005983	0.00700847	0.00648639	0.0152233	0.00493221	0.00244119	0.0118545	0.0130564	0.0669854
CSS0027857	0.0212739	0.00991533	0.0223955	0.0201483	0.00395854	0.0212494	0.0192568	0.0217655	0.139963
CSS0005492	0	0	0	0	0	0	0	0	0
CSS0035615	0	0	0	0	0	0	0	0	0
CSS0008301	0	0	0	0	0	0	0	0	0
CSS0006890	0	0	0	0	0	0	0	0	0
CSS0030614	0	0	0	0	0	0	0	0	0
CSS0009610	0	0	0	0	0	0	0	0	0
CSS0028263	0	0	0	0	0	0	0	0	0
CSS0049868	0	0	0	0	0	0	0	0	0
CSS0000620	0	0	0	0	0	0	0	0	0
CSS0046979	0	0	0	0	0	0	0	0	0
CSS0045202	0	0	0	0	0	0	0	0	0
CSS0020815	0	0	0	0	0	0	0	0	0
CSS0002361	0	0	0	0	0	0	0	0	0
CSS0042302	0	0	0	0	0	0	0	0	0
CSS0035500	0	0	0	0	0	0	0	0	0
CSS0050522	0.00547257	0.0189561	0.0079731	0.00970958	0.00460705	0.0131779	0	0.0242918	0.0841881
CSS0033807	0	0	0	0	0	0	0	0	0
CSS0031184	0	0	0	0	0	0	0	0	0
CSS0047598	0	0	0	0	0	0	0	0	0
CSS0038263	0.0174995	0.051008	0.00815442	0.0366357	0.0395538	0.0164951	0.00726205	0	0.176609
CSS0045896	0.0775837	0.0311763	0.0665418	0.0505714	0.111389	0.0645575	0.0523328	0.112401	0.566554
CSS0031988	0	0	0	0	0	0	0	0	0
CSS0041083	0.130435	0.0378787	0.112727	0.0985376	0.0872237	0.0689157	0.137167	0.16501	0.837895
CSS0038356	0	0	0	0	0	0	0	0	0
CSS0048324	0.00332354	0.00244719	0.00261786	0.00109114	0	0.00731263	0	0	0.0167924
CSS0049284	0.0418798	0.0326784	0.0202252	0.0917973	0.0388944	0.0564604	0.0709146	0.140394	0.493244
CSS0048129	0	0.00119502	0.00112302	0.00222698	0	0	0	0	0.00454502
CSS0031086	0.00246714	0	0.000779162	0.000763676	0	0	0	0	0.00400998
CSS0034847	0	0	0	0	0	0	0	0	0
CSS0030340	0	0	0	0	0	0	0.0046591	0	0.0046591
CSS0036551	0	0	0	0	0	0	0	0	0
CSS0009688	0	0	0	0	0	0	0	0	0
CSS0032133	0	0	0	0	0	0	0	0	0
CSS0014744	0.00195628	0.00200694	0.00511126	0.0061866	0	0	0.010321	0.00518835	0.0307704
CSS0030680	0.00627908	0.00238435	0.00720028	0.00317632	0.00294673	0.00256047	0.0135752	0.00646245	0.0445849
CSS0043630	0	0	0	0	0	0	0	0	0
CSS0011005	0	0	0	0	0	0	0	0	0
CSS0018956	0.104596	0.247852	0.122072	0.267549	0.271406	0.0943891	0.10596	0.216639	1.43046
CSS0028646	0.327207	0.157448	0.21811	0.291914	0.154609	0.316834	0.199717	0.509981	2.17582
CSS0031825	0	0	0	0	0	0	0	0	0
CSS0002007	0	0	0	0	0	0	0	0	0
CSS0046772	0.00774363	0.0143775	0.0137284	0.0131253	0	0	0.014245	0.047964	0.111184
CSS0034297	0.00209073	0.0011382	0.00191695	0	0	0	0.00821878	0	0.0133647
CSS0005781	0	0	0	0	0	0	0	0	0
CSS0016283	0	0	0	0	0	0	0	0	0
CSS0010737	0.415248	0.183045	0.361712	0.3073	0.354618	0.357486	0.400839	0.46524	2.84549
CSS0035966	0.0470356	0.0263891	0.0624798	0.0431323	0.0375763	0.0567486	0.0518914	0.0547587	0.380012
CSS0042388	0.00211872	0.0065052	0.00858751	0.0038227	0.00451824	0.0027289	0.00872125	0.0169379	0.0539404
CSS0044206	0	0	0	0	0	0	0	0	0
CSS0036077	0.0470069	0.0569852	0.1004	0.0528175	0.0383613	0.0744539	0.0355333	0.0429965	0.448554
CSS0024999	0	0	0	0	0	0	0	0	0
CSS0026342	0	0	0	0	0	0	0	0	0
CSS0023595	0	0	0	0	0	0	0	0	0
CSS0045689	0	0	0	0	0	0	0	0	0
CSS0041269	0	0	0	0	0	0	0	0	0
CSS0049488	0	0	0.00072792	0	0	0.00242333	0	0	0.00315125
CSS0047652	0	0	0	0	0	0	0	0	0
CSS0045045	0	0	0	0	0	0	0	0	0
CSS0016099	0	0	0	0	0	0	0	0	0
CSS0045688	0	0	0	0	0	0	0	0	0
CSS0010371	0	0	0	0	0	0	0	0	0
CSS0034337	0	0	0	0	0	0	0	0	0
CSS0009851	0	0	0	0	0	0	0	0	0
CSS0016134	0	0	0	0	0	0	0	0	0
CSS0021537	0	0	0	0	0	0	0	0	0
CSS0016401	0.00317384	0.0165359	0.00254807	0.0169025	0.019123	0.0165822	0.0041786	0.0268745	0.105919
CSS0034630	0	0	0	0	0	0	0	0	0
CSS0005084	0	0	0	0	0	0	0	0	0
CSS0039553	0	0	0	0	0	0	0	0	0
CSS0022864	0	0	0	0	0	0	0	0	0
CSS0004655	0	0	0	0	0	0	0	0	0
CSS0032995	0	0	0	0	0	0	0	0	0
CSS0020841	0	0	0	0	0	0	0	0	0
CSS0000031	0	0	0	0	0	0	0	0	0
CSS0027155	0	0	0	0	0	0	0	0	0
CSS0019630	0.00678171	0.00942009	0.0408722	0.000995548	0.0092781	0.0100133	0.0147042	0.0504596	0.142525
CSS0005256	0	0.00125406	0.00106314	0	0	0	0	0.00574945	0.00806666
CSS0003747	0.00217605	0.00114649	0.00145408	0.00349194	0	0	0.0133632	0	0.0216318
CSS0020740	0.0163622	0.0142451	0.07528	0.04081	0.0412179	0.040606	0.187062	0.0256753	0.441259
CSS0027058	0	0	0	0	0	0	0	0	0
CSS0008253	0.0289934	0.0356317	0.042839	0.0551198	0.0318232	0.0526665	0.00747044	0.081438	0.335982
CSS0019291	0.000709152	0	0	0	0	0	0	0	0.000709152
CSS0007267	0.066165	0.0204136	0.0886166	0.0432112	0.0446827	0.0290875	0.0314758	0.0673371	0.390989
CSS0002664	0	0	0	0	0	0	0	0	0
CSS0032435	0.00789687	0.00445434	0.0214948	0.00579826	0	0.0189296	0.00696042	0.0066178	0.0721521
CSS0024368	0	0	0	0	0	0	0	0	0
CSS0019414	0.00246929	0.00105873	0	0	0.00322518	0	0	0	0.00675319
CSS0048267	0	0	0	0.000883846	0	0	0	0.00588508	0.00676893
CSS0027082	0	0	0	0	0	0	0	0	0
CSS0019437	0	0	0	0	0	0	0	0	0
CSS0026931	0	0	0	0	0	0	0	0	0
CSS0042289	0	0.00102633	0	0.00107349	0	0	0	0	0.00209982
CSS0010935	0	0	0	0	0	0	0	0	0
CSS0031316	0	0	0	0	0	0	0	0	0
CSS0030097	0	0	0	0	0	0	0	0	0
CSS0005035	0	0	0	0	0	0	0	0	0
CSS0004960	0	0	0	0	0	0	0	0	0
CSS0026764	0	0	0	0	0	0	0	0	0
CSS0021515	0.000762267	0.00118446	0.00137069	0.000803497	0	0	0	0.0143271	0.018448
CSS0011309	0	0	0	0	0	0	0	0	0
CSS0028315	0	0	0	0	0	0	0	0	0
CSS0049205	0	0	0	0.00144239	0	0	0	0	0.00144239
CSS0024438	0	0	0	0	0	0	0	0	0
CSS0036499	0.00791836	0.000742032	0.00527453	0.00665142	0.0150732	0.0129868	0.0172293	0.00484161	0.0707173
CSS0005854	0	0	0	0	0	0	0	0	0
CSS0042094	0.0080314	0.0224214	0.0215102	0.0221737	0.00835654	0.00766393	0	0.0195374	0.109695
CSS0022176	0	0	0	0	0	0	0	0	0
CSS0023006	0	0	0	0	0	0	0	0	0
CSS0020919	0	0.00118388	0	0	0	0	0	0	0.00118388
CSS0016220	0.0132541	0.025285	0.00683247	0.0240431	0.0695587	0	0.0162662	0.140858	0.296097
CSS0014172	0.00586572	0.0163145	0.00466457	0.00517653	0.00517343	0.0144623	0.0603473	0.0381314	0.150136
CSS0028450	0.00901149	0.0330314	0.0074969	0.0369945	0.00690358	0.00506587	0.0184222	0.0118535	0.128779
CSS0035385	0	0.00210415	0.0010376	0	0	0	0	0	0.00314175
CSS0012806	0.0517116	0.0932173	0.114838	0.190377	0.207487	0.120258	0.334136	0.0237271	1.13575
CSS0049307	0	0	0	0	0	0	0	0	0
CSS0043944	0	0	0	0	0	0	0	0	0
CSS0041116	0.000541658	0	0.00235249	0.00101164	0	0	0	0	0.00390578
CSS0050082	0.00432843	0.000746398	0.00117892	0.000955985	0	0	0	0	0.00720974
CSS0046907	0.000416182	0	0.00114286	0	0	0	0	0	0.00155904
CSS0040385	0.00518541	0.000567619	0.00293153	0.00281346	0	0	0	0	0.011498
CSS0038345	0	0	0	0	0	0	0	0	0
CSS0011095	0	0	0	0	0	0	0	0	0
CSS0003602	0	0	0	0	0	0	0	0	0
CSS0040808	0	0	0.00119381	0	0	0	0	0	0.00119381
CSS0030811	0.00157001	0	0.00388626	0.0020302	0	0	0.00677151	0	0.014258
CSS0019185	0.00169997	0.00427644	0.00170001	0	0	0	0.00894467	0	0.0166211
CSS0015308	0.0529316	0.0258112	0.0719498	0.0585995	0.0158446	0.014682	0.0606795	0.0429668	0.343465
CSS0026594	0.0507011	0.0307582	0.0385742	0.0580852	0.112935	0.0206374	0.0964837	0.0215802	0.429756
CSS0048039	0	0	0	0	0	0	0	0	0
CSS0046132	0.000541162	0	0.00100036	0.0011345	0	0.00266376	0.014139	0	0.0194788
CSS0030494	0	0.00124111	0	0	0	0	0	0.00517058	0.00641169
CSS0034181	0.0513316	0.024268	0.103511	0.038113	0.0300803	0.0340809	0.0282283	0.0206893	0.330302
CSS0009633	0	0	0	0	0	0	0	0	0
CSS0046219	0	0	0	0	0	0	0	0	0
CSS0030209	0	0	0	0	0	0	0	0	0
CSS0015508	0	0	0.00142258	0	0.00214087	0	0	0	0.00356346
CSS0010747	0	0	0.00139166	0	0	0	0	0	0.00139166
CSS0023542	0.00152792	0.00101225	0.00463631	0.0052147	0	0	0	0.00645099	0.0188422
CSS0039585	0.325933	0.204169	0.588339	0.305495	0.291874	0.115006	0.526867	0.173585	2.53127
CSS0041281	0	0	0.00103805	0.000732033	0	0	0	0	0.00177008
CSS0041175	0	0	0	0	0	0	0	0	0
CSS0024483	0	0.00130039	0.000629761	0.000744312	0	0	0	0	0.00267446
CSS0011191	0	0	0	0	0	0	0	0	0
CSS0005074	0.00570697	0.0182994	0.0136408	0.00881823	0	0.0147671	0	0.0443917	0.105624
CSS0021658	0.00196469	0.000764689	0	0	0	0	0	0	0.00272938
CSS0044408	0.00926542	0.0218627	0.0053729	0.0215768	0.0052376	0.0099698	0.00897554	0.00803122	0.090292
CSS0004028	0	0	0	0	0	0	0	0	0
CSS0039025	0	0	0	0	0	0	0	0	0
CSS0045208	0.00118009	0.00307432	0.00329002	0.00691733	0	0.00357429	0.00385077	0.0136697	0.0355565
CSS0037044	0	0	0	0	0	0	0	0	0
CSS0024775	0.00135776	0	0.00072397	0.00233244	0.00245445	0	0	0.00516301	0.0120316
CSS0008200	0	0	0	0	0	0	0	0	0
CSS0023912	0	0	0.00503191	0.00405028	0	0	0.00786918	0.0105173	0.0274687
CSS0030686	0	0	0	0	0	0	0	0	0
CSS0007359	0	0	0	0	0	0	0	0	0
CSS0036596	0.00084025	0	0.000964705	0	0	0	0	0.00538343	0.00718839
CSS0032763	0	0	0.000991939	0	0	0	0	0.00572044	0.00671237
CSS0013672	0	0	0.000781541	0	0	0	0	0	0.000781541
CSS0039379	0	0	0	0	0	0	0	0	0
CSS0047402	0	0	0	0	0	0	0	0	0
CSS0007864	0	0	0	0	0	0	0	0	0
CSS0026633	0	0	0	0	0	0	0	0	0
CSS0006228	0	0	0	0	0	0	0	0	0
CSS0037091	0	0	0	0	0	0	0	0	0
CSS0049409	0	0	0	0	0	0	0	0	0
CSS0045025	0	0	0	0	0	0	0	0	0
CSS0037512	0	0	0	0	0	0	0	0	0
CSS0008538	0	0	0	0	0	0	0	0	0
CSS0030741	0	0	0	0	0	0.0026913	0	0	0.0026913
CSS0049744	0.019008	0.0297031	0.0353487	0.0553765	0.02162	0.0297565	0.073193	0.0297843	0.29379
CSS0038169	0.000443266	0.00433835	0.00172464	0.00865249	0.00325111	0	0.00385426	0.00787157	0.0301357
CSS0045375	0	0	0	0	0	0	0	0	0
CSS0033686	0	0	0	0	0	0	0	0	0
CSS0034603	0	0	0	0.000929016	0	0	0	0	0.000929016
CSS0002014	0	0	0	0	0	0	0	0	0
CSS0003350	0	0	0	0	0	0	0	0	0
CSS0003796	0	0	0	0	0	0	0	0	0
CSS0028871	0	0	0	0	0	0	0	0	0
CSS0043362	0	0	0	0	0	0	0	0	0
CSS0042012	0.0080175	0.00721029	0.00562095	0.014922	0.0251526	0.00534576	0	0.0219353	0.0882044
CSS0019461	0.0679599	0.0112816	0.0139087	0.0171846	0.008723	0.0142359	0.00480496	0.0255104	0.163609
CSS0031381	0	0	0	0	0	0	0	0	0
CSS0040662	0	0	0	0	0	0	0	0	0
CSS0017193	0	0	0.000996526	0	0	0	0	0	0.000996526
CSS0047646	0	0	0	0	0	0	0	0	0
CSS0006780	0	0	0	0	0	0	0	0	0
CSS0007459	0	0	0	0	0	0	0	0	0
CSS0023133	0	0.00105339	0	0	0	0	0	0	0.00105339
CSS0021296	0	0	0	0	0	0	0	0	0
CSS0026812	0	0	0	0	0	0	0	0	0
CSS0014836	0	0	0	0	0	0	0	0	0
CSS0038224	0	0	0	0	0	0	0	0	0
CSS0031541	0.444869	0.227971	0.451279	0.308866	0.214968	0.306861	0.494698	0.396921	2.84643
CSS0046699	0.0645916	0.0251727	0.014154	0.0371164	0.0525666	0.0374575	0.0391529	0.0395956	0.309807
CSS0006073	0	0	0	0	0	0	0	0	0
CSS0041360	0	0	0	0	0	0	0	0	0
CSS0023393	0	0.00557765	0.00840444	0.00851281	0	0	0	0	0.0224949
CSS0038890	0	0	0	0	0	0	0	0	0
CSS0048010	0	0	0	0	0	0	0	0	0
CSS0025830	0	0	0	0	0	0	0	0	0
CSS0005869	0	0	0	0	0	0	0	0	0
CSS0002091	0.316537	0.329881	0.183229	0.437982	0.246162	0.451231	0.187044	0.57204	2.72411
CSS0048278	0	0	0	0	0	0	0	0	0
CSS0017132	0	0	0	0	0	0	0	0	0
CSS0014865	0	0.00242109	0	0.00170158	0	0	0	0	0.00412267
CSS0044813	0	0	0	0	0	0	0	0	0
CSS0030556	0	0	0.00073956	0	0	0	0	0	0.00073956
CSS0002598	0	0	0	0	0	0	0	0	0
CSS0029826	0	0	0	0	0	0	0	0	0
CSS0039277	0	0	0.00084844	0	0	0.00513008	0	0	0.00597852
CSS0040408	0.00677455	0.00462054	0.00284378	0	0	0	0	0	0.0142389
CSS0011008	0	0.00113211	0	0.000995349	0	0	0	0	0.00212746
CSS0045148	0.0798661	0.0791053	0.0913103	0.111474	0.116382	0.0776775	0.106881	0.136732	0.799427
CSS0046255	0	0	0	0	0	0	0	0	0
CSS0014177	0.00061947	0.0034016	0.00245152	0.00243813	0	0.00298561	0	0	0.0118963
CSS0004673	0	0	0	0	0	0	0	0	0
CSS0034897	0	0	0	0	0	0	0	0	0
CSS0041643	0.000728103	0.000993498	0	0.0026428	0	0.00222739	0.00507732	0	0.0116691
CSS0017243	0	0.000718131	0	0	0	0	0	0	0.000718131
CSS0039461	0	0	0	0	0	0	0	0	0
CSS0042178	0.000663222	0	0	0.0024588	0	0	0	0	0.00312202
CSS0049041	0.0732831	0.0385	0.0609226	0.04416	0.0433887	0.030272	0.0950494	0.0458464	0.431422
CSS0025955	0	0	0	0	0	0	0	0	0
CSS0043727	0	0	0	0	0	0	0	0	0
CSS0009027	0.00108619	0.00114336	0.00122747	0.00109541	0	0	0.0136046	0	0.018157
CSS0031231	0	0	0	0	0	0	0	0	0
CSS0010683	0.0138702	0.0294971	0.010153	0.0384447	0.0779828	0.0216229	0.0383316	0.0604086	0.290311
CSS0048625	0	0	0	0	0	0	0	0	0
CSS0048064	0	0	0	0	0	0	0	0	0
CSS0024295	0	0	0	0	0	0	0	0	0
CSS0018666	0	0	0.000875168	0	0	0	0	0	0.000875168
CSS0027176	0	0	0	0	0	0	0	0	0
CSS0044000	0.0152947	0.0240822	0.0384431	0.0315177	0.0431816	0.00472968	0.0345451	0.0279633	0.219757
CSS0044656	0	0	0	0	0	0	0	0	0
CSS0016867	0.00662019	0.0186498	0.0092004	0.0236532	0.00257075	0.0031258	0.0122876	0.0183412	0.094449
CSS0048006	0.274386	0.122948	0.294638	0.187595	0.157006	0.236587	0.329969	0.21223	1.81536
CSS0041198	0	0	0	0	0	0	0	0	0
CSS0048934	0.000727557	0.00654609	0.0010032	0.00828629	0.00458231	0.00487904	0.0304098	0.00398046	0.0604147
CSS0007682	0	0	0	0	0	0	0	0	0
CSS0026196	0	0	0	0	0	0	0	0	0
CSS0039988	0	0	0	0	0	0	0	0	0
CSS0010025	0	0	0	0	0	0	0	0	0
CSS0001268	0	0	0	0	0	0	0	0	0
CSS0017664	0	0	0	0	0	0	0	0	0
CSS0026649	0	0.00434951	0.000621425	0.00186724	0	0.0539248	0.00505641	0.0354392	0.101259
CSS0035970	0.0421383	0.0114508	0.0286594	0.0124553	0.00765371	0.0235433	0.00747044	0.016554	0.149925
CSS0036952	0	0	0	0	0	0	0	0	0
CSS0007972	0	0	0.00131754	0	0	0	0	0	0.00131754
CSS0015741	0.000869475	0	0.00104138	0.00295709	0	0	0	0	0.00486794
CSS0039145	0	0	0	0	0	0	0	0	0
CSS0020162	0.033936	0.0507816	0.0359474	0.083204	0.0351639	0.271141	0.0218536	0.11491	0.646938
CSS0004955	0	0	0.000926189	0	0	0	0.00404531	0	0.0049715
CSS0027473	0	0	0	0	0	0	0	0	0
CSS0040341	0	0	0	0	0	0	0	0	0
CSS0008985	0	0	0	0	0	0	0	0	0
CSS0024827	0	0	0	0	0	0	0	0	0
CSS0006648	0.0818426	0.138762	0.13553	0.188031	0.161053	0.198785	0.25163	0.25629	1.41192
CSS0033710	0	0	0	0	0	0	0	0	0
CSS0015678	0.0291771	0.0412736	0.0115051	0.0453665	0.0382126	0.0533644	0.0791293	0.033791	0.33182
CSS0047844	0	0	0	0	0	0	0	0	0
CSS0010521	0.00797912	0.00380316	0.00172993	0.00581069	0.00213208	0.0090619	0	0.00547213	0.035989
CSS0044451	0.00539784	0.00215178	0.00182729	0.00374615	0	0	0	0	0.0131231
CSS0042230	0	0	0	0	0	0	0	0	0
CSS0039374	0.0700389	0.0391134	0.109979	0.0533997	0.0440779	0.0526804	0.0520541	0.0782362	0.49958
CSS0019552	0	0	0	0	0	0	0	0	0
CSS0023727	0.000604208	0.00345493	0.00121907	0	0	0.00487904	0	0	0.0101572
CSS0030299	0	0.00177492	0.0036333	0.00141529	0.00443808	0	0	0	0.0112616
CSS0048829	0	0	0	0	0	0	0	0	0
CSS0046422	0.0291683	0.0152047	0.0236255	0.0229658	0.00330046	0.0293811	0.0363966	0.0220201	0.182063
CSS0027322	0	0	0	0	0	0	0	0	0
CSS0039852	0	0	0	0	0	0	0	0	0
CSS0017757	0	0	0	0	0	0	0	0	0
CSS0042926	0	0	0	0	0	0	0	0	0
CSS0002258	0.0229027	0.0147373	0.0233348	0.0295655	0.0129958	0.0304051	0.00797126	0.0590969	0.201009
CSS0040420	0.0304577	0.0536083	0.0467397	0.0707163	0.0418169	0.040152	0.0503635	0.0822813	0.416136
CSS0048539	0.00674109	0.00228882	0.00601049	0.00642735	0.00191844	0.0231797	0	0	0.0465659
CSS0024706	0	0	0	0	0	0	0	0	0
CSS0035098	0	0	0	0	0	0	0	0	0
CSS0019874	0	0	0	0	0	0	0	0	0
CSS0002108	0	0	0	0.00100504	0	0.00568867	0	0	0.00669372
CSS0017636	0.00152829	0.00386469	0	0.00762015	0.00584785	0	0.00404531	0	0.0229063
CSS0048096	0	0	0	0	0	0	0	0	0
CSS0031162	0.0615335	0.0428247	0.0689811	0.0652227	0.0743268	0.0779729	0.131073	0.106103	0.628038
CSS0014775	0	0	0	0	0	0	0	0	0
CSS0032931	0	0	0	0	0	0	0	0	0
CSS0007027	0	0	0	0	0	0	0	0	0
CSS0047196	0.000606518	0.00098297	0	0	0	0	0	0	0.00158949
CSS0045759	0	0	0	0	0	0	0	0	0
CSS0049198	0.000806027	0.00343886	0.00148272	0.00544053	0.00196787	0.00537246	0	0.00471227	0.0232207
CSS0043186	0	0	0	0	0	0	0	0	0
CSS0048973	0.103775	0.0190895	0.0709479	0.0292855	0.0299889	0.0407383	0.0507	0.0213175	0.365843
CSS0049943	0.000687782	0	0	0	0	0	0	0	0.000687782
CSS0050310	0	0	0	0	0	0	0	0	0
CSS0035131	0	0	0	0	0	0	0	0	0
CSS0020236	0.0100544	0.00893001	0.0194595	0.0159274	0.00414557	0.0168076	0.0305513	0.00969877	0.115575
CSS0016101	0	0	0	0	0	0	0	0	0
CSS0045342	0	0	0	0	0	0	0	0.00686599	0.00686599
CSS0015725	0.00127758	0.0015298	0.00669809	0.00094035	0.00694335	0.00778453	0.00934467	0.00973533	0.0442537
CSS0022480	0	0	0	0	0	0	0	0	0
CSS0028945	0	0	0.00433567	0.00218528	0	0	0	0.0040663	0.0105872
CSS0046158	0	0	0	0	0	0	0	0	0
CSS0007996	0.0374254	0.0264412	0.0592184	0.0118454	0.0201607	0.0425373	0.136722	0.00446466	0.338815
CSS0042203	0	0	0	0	0	0	0.00802114	0	0.00802114
CSS0017728	0	0	0	0	0	0	0	0	0
CSS0011020	0	0	0	0	0	0	0	0	0
CSS0013269	0	0	0	0	0	0	0	0	0
CSS0003091	0	0	0	0	0	0	0	0	0
CSS0011803	0.0151385	0.0100642	0.0297049	0.00548292	0.0249238	0.0303797	0.146713	0	0.262407
CSS0024685	0	0	0	0	0	0	0	0	0
CSS0042416	0	0	0	0	0	0	0	0	0
CSS0033441	0	0.0044937	0.00122951	0.00173424	0	0	0	0	0.00745745
CSS0005925	0	0.00191145	0.00114455	0.00108616	0	0.00242365	0	0	0.00656582
CSS0034821	0	0	0	0	0	0	0	0	0
CSS0019838	0	0	0	0	0	0	0	0	0
CSS0031818	0	0	0	0	0	0	0	0	0
CSS0037491	0	0	0	0	0	0.00370701	0	0	0.00370701
CSS0024839	0	0	0	0	0	0	0	0.00816812	0.00816812
CSS0019814	0.000700677	0	0.00405957	0.00104445	0.00279801	0	0	0	0.00860271
CSS0006239	0	0.00229181	0	0	0	0	0	0	0.00229181
CSS0006931	0.123416	0.124845	0.233813	0.194943	0.105233	0.230406	0.214739	0.425977	1.65337
CSS0028824	0.000860733	0	0	0	0	0	0	0	0.000860733
CSS0027979	0	0	0	0	0	0	0	0	0
CSS0016631	0.00203232	0	0.000845299	0	0	0.0034136	0	0	0.00629122
CSS0031348	0.0153316	0.0103883	0.0282883	0.0219517	0.00672311	0.0121357	0.0394867	0.0228393	0.157145
CSS0007997	0	0	0	0	0	0	0	0	0
CSS0023190	0	0	0	0	0	0	0	0	0
CSS0042500	0.00234765	0.00239602	0.00236535	0.00205894	0	0	0	0	0.00916796
CSS0001242	0.000861187	0.000863892	0.00201081	0.000978337	0	0	0	0.00493875	0.00965297
CSS0021797	0.000826348	0	0.00142056	0.00150443	0	0	0	0	0.00375134
CSS0039631	0.000732792	0.00307901	0.00354363	0.000821218	0	0.00570002	0	0	0.0138767
CSS0050206	0	0	0	0.00102194	0	0	0	0	0.00102194
CSS0002052	0	0	0	0	0	0	0	0	0
CSS0047795	0.0151311	0.00794266	0.0181398	0.0154638	0.00671268	0.0248427	0	0.0194229	0.107656
CSS0004519	0.00891673	0.0213278	0.0120115	0.020342	0.0405176	0.00598818	0.00884717	0.0470462	0.164997
CSS0025829	0.00211122	0.00577074	0.00198959	0.00356106	0.00211989	0.00691184	0	0.0382426	0.060707
CSS0012082	0	0	0	0.00102643	0	0	0	0	0.00102643
CSS0042493	0	0	0	0	0	0	0	0	0
CSS0050396	0	0	0	0	0	0	0	0.00572044	0.00572044
CSS0004373	0	0	0	0	0	0	0	0	0
CSS0044082	0.254669	0.122039	0.283891	0.230439	0.143782	0.192228	0.162425	0.0596417	1.44911
CSS0049166	0	0	0	0	0	0	0	0	0
CSS0042544	0	0	0	0	0	0	0	0	0
CSS0008772	0	0	0	0	0	0	0	0	0
CSS0005513	0	0	0	0	0	0	0	0	0
CSS0013818	0	0	0	0	0	0	0	0	0
CSS0032352	0.0249898	0.0137675	0.0303314	0.0247431	0.00369894	0.0209196	0	0.0558438	0.174294
CSS0048628	0.00116854	0.0010984	0.00358638	0.00268946	0	0	0	0	0.00854279
CSS0048238	0.00149663	0	0.000911325	0	0	0.00563197	0	0	0.00803993
CSS0029570	0.00124691	0.00127398	0.00584025	0	0	0	0	0.008442	0.0168031
CSS0047166	0	0	0.00131754	0	0	0	0	0	0.00131754
CSS0010708	0.0132186	0.00486115	0.0178635	0.0124598	0	0.00968934	0.0103243	0.0099052	0.0783219
CSS0002355	0	0.00131228	0.00208157	0.00129361	0.00340074	0	0.00850338	0	0.0165916
CSS0039253	0.00166538	0.00108707	0.00241165	0.00246536	0	0	0	0	0.00762946
CSS0000705	0.232419	0.145359	0.277902	0.195159	0.227112	0.185927	0.246947	0.329398	1.84022
CSS0028210	0.042557	0.0168683	0.0450297	0.0211517	0.00479482	0.0479459	0.0600017	0.0392111	0.27756
CSS0023048	0	0	0	0	0	0	0	0	0
CSS0048859	0.0209472	0.015157	0.0227014	0.00683208	0.00824639	0.0161944	0.0492016	0.0102568	0.149537
CSS0011112	0.00153878	0	0.00112871	0	0	0.00298455	0	0	0.00565205
CSS0020006	0	0	0	0	0	0	0	0	0
CSS0002472	0	0	0	0	0	0	0	0	0
CSS0037986	0	0	0	0	0	0	0	0	0
CSS0024413	0	0	0	0	0	0.00222739	0	0	0.00222739
CSS0001149	0	0	0	0	0	0	0	0	0
CSS0013324	0	0	0	0	0	0	0	0	0
CSS0016485	0	0	0	0	0	0	0	0	0
CSS0040824	0	0	0	0	0	0	0	0	0
CSS0004562	0	0	0	0	0	0	0	0	0
CSS0004243	0	0	0	0	0	0	0	0	0
CSS0034737	0	0	0	0	0	0	0	0	0
CSS0007539	0.0151753	0.00864086	0.00850379	0.0164844	0.00631311	0.00566487	0	0.0345967	0.095379
CSS0035371	0.0468004	0.015111	0.0335303	0.0320733	0.00537056	0.0259035	0.05459	0.0655623	0.278941
CSS0044760	0.000701659	0	0	0	0	0	0	0	0.000701659
CSS0018511	0	0	0	0	0	0	0	0	0
CSS0033934	0	0.0012718	0.00259107	0.00164319	0	0	0	0	0.00550606
CSS0007381	0.000886851	0	0	0	0	0	0	0	0.000886851
CSS0044251	0.00252382	0.00683991	0.0224747	0.00891641	0	0.00824203	0	0.0330624	0.0820593
CSS0021611	0	0	0	0	0	0	0	0	0
CSS0016588	0.00446051	0.00600772	0.0119038	0.0163041	0.00405975	0.0027009	0.0046591	0.04236	0.0924558
CSS0013665	0.000571821	0.00537017	0	0.00754936	0.00201219	0	0.0107939	0.0047515	0.031049
CSS0023698	0	0	0	0	0	0	0	0	0
CSS0027203	0.00805509	0.0114931	0.0098074	0.0168633	0	0.00745323	0.00853733	0.022339	0.0845485
CSS0015681	0	0	0	0.00193731	0	0	0	0	0.00193731
CSS0014037	0	0	0	0	0	0.0028546	0	0	0.0028546
CSS0010524	0	0	0.00103015	0	0	0	0	0	0.00103015
CSS0038766	0	0	0	0.000905531	0	0	0	0	0.000905531
CSS0002454	0.00117432	0.000764689	0.000927538	0.00215383	0	0	0	0.0080388	0.0130592
CSS0049608	0	0	0	0	0	0	0	0	0
CSS0019548	0.000797313	0.00115442	0.00106657	0.00219803	0	0	0	0.00453721	0.00975355
CSS0043361	0	0	0	0	0	0	0	0	0
CSS0004166	0.0929018	0.24124	0.245875	0.282568	0.0900806	0.223345	0.320819	0.37071	1.86754
CSS0034587	0.000697753	0	0.000730547	0	0	0.00262462	0	0	0.00405292
CSS0044505	0	0	0	0	0	0	0	0	0
CSS0019438	0	0	0	0	0	0	0	0	0
CSS0034605	0.0251168	0.00438899	0.035338	0.0159596	0.00312216	0.0225195	0.00679421	0.0432338	0.156473
CSS0043465	0.00409046	0.0095023	0.00594074	0.00319947	0	0.00761414	0	0.0178274	0.0481745
CSS0002011	0.00854982	0.000985657	0.00236062	0.00232725	0	0.00371961	0	0	0.017943
CSS0007759	0.000808251	0	0	0	0	0	0	0	0.000808251
CSS0001959	0.24845	0.150019	0.194064	0.219978	0.190911	0.15797	0.330088	0.347878	1.83936
CSS0005420	0	0	0	0	0	0	0	0	0
CSS0011517	0	0	0	0	0	0	0	0	0
CSS0039372	0	0	0	0	0	0	0	0	0
CSS0007293	0	0	0.000623211	0	0	0	0	0	0.000623211
CSS0010619	0	0	0	0	0	0	0	0	0
CSS0047758	0	0	0	0	0	0	0	0	0
CSS0001921	0	0	0	0	0	0	0	0	0
CSS0041141	0	0.000922876	0	0.00081856	0	0.00308801	0.00394795	0.00541513	0.0141925
CSS0002202	0	0	0	0	0	0	0	0	0
CSS0045087	0	0	0	0	0	0	0	0	0
CSS0036697	0	0	0	0	0	0	0	0	0
CSS0040229	0	0.00131389	0	0	0	0	0	0	0.00131389
CSS0005115	0.011541	0.0206047	0.0495813	0.0217655	0.0125302	0.0273989	0.0263678	0.0533573	0.223147
CSS0005770	0	0	0	0	0	0	0	0	0
CSS0015600	0	0	0	0	0	0	0	0	0
CSS0039260	0	0	0	0	0	0	0	0	0
CSS0002614	0.000896487	0	0	0.0023916	0	0	0	0	0.00328809
CSS0028730	0.0176642	0.00670023	0.0121149	0.0129602	0.025716	0.0162145	0.0173349	0.029723	0.138428
CSS0033126	0.00358172	0.00114336	0.00189881	0.00121166	0	0	0	0	0.00783554
CSS0028613	0	0	0	0	0	0	0	0	0
CSS0040067	0.000852265	0	0.00235229	0.000688979	0	0.00261484	0.00788115	0.00753565	0.0219252
CSS0030474	0.000737853	0.00101407	0.00643844	0.00179582	0	0.0100267	0	0	0.0200129
CSS0030609	0.0121477	0.0157259	0.0260725	0.0466521	0.0555139	0.038128	0.0227912	0.0173732	0.234405
CSS0020065	0.00586785	0.00339767	0.0109236	0.0131477	0.00204061	0.0164404	0	0.00684848	0.0586663
CSS0006501	0.000928181	0.00415074	0.00100238	0	0	0	0	0	0.0060813
CSS0044622	0.00149428	0.00199109	0	0.0012642	0.00372136	0	0	0	0.00847093
CSS0003175	0	0	0	0	0	0	0	0	0
CSS0033799	0.00197749	0	0.00272405	0.00105307	0	0	0	0	0.00575461
CSS0008569	0.0146634	0.0372033	0.0156345	0.0506719	0.0301473	0.0340646	0.0699225	0.0595988	0.311906
CSS0005334	0	0.00120162	0	0	0	0	0	0	0.00120162
CSS0013414	0	0	0	0	0	0	0	0	0
CSS0006620	0.122931	0.118794	0.205904	0.333735	0.0980925	0.196434	0.316051	0.0544252	1.44637
CSS0050017	0.0616217	0.090759	0.0358137	0.0449393	0.0359097	0.0984633	0.0625524	0.145334	0.575393
CSS0037029	0	0.00112364	0	0.000985486	0	0	0	0	0.00210912
CSS0000997	0	0	0	0.00101876	0	0	0	0	0.00101876
CSS0016250	0	0.00132205	0.000963039	0.00222624	0	0	0	0	0.00451134
CSS0032849	0.000892388	0	0	0.000801929	0	0	0	0	0.00169432
CSS0029832	0	0	0	0	0	0	0	0	0
CSS0002832	0	0	0	0	0	0	0	0	0
CSS0026880	0.000631145	0	0.000838963	0	0	0.00383234	0	0	0.00530245
CSS0007016	0	0	0	0	0	0	0	0	0
CSS0036114	0	0	0	0	0	0	0	0	0
CSS0019646	0	0	0	0	0	0	0	0	0
CSS0025377	0	0	0	0	0	0	0	0	0
CSS0003789	0.000750068	0	0.00127261	0.000928171	0	0	0	0.00935846	0.0123093
CSS0019471	0	0	0	0	0	0	0	0	0
CSS0037824	0	0	0	0	0	0	0	0	0
CSS0021166	0.0240417	0.0306015	0.0235953	0.0852615	0.0117477	0.0955109	0.0239803	0.218094	0.512833
CSS0016726	0	0	0	0	0	0	0	0	0
CSS0017456	0	0.0011035	0.00141554	0.000882793	0	0	0	0	0.00340184
CSS0033831	0.00155491	0.00374666	0.0102924	0.0043148	0	0.0212376	0.00557336	0	0.0467197
CSS0048117	0	0	0	0	0	0	0	0	0
CSS0021070	0	0	0	0	0	0	0	0	0
CSS0027483	0	0	0	0	0	0	0	0	0
CSS0046835	0	0	0	0	0	0	0	0	0
CSS0047031	0	0	0	0	0	0	0	0	0
CSS0000291	0	0	0.00128431	0	0	0.00602898	0	0	0.00731329
CSS0035179	0	0	0	0	0	0	0	0	0
CSS0047791	0.0131131	0.0245088	0.0151518	0.0211068	0.0133161	0.00422306	0.00836535	0.0442704	0.144055
CSS0004351	0.0367498	0.0405081	0.0226576	0.0456209	0.00745099	0.0910149	0.0164581	0.169832	0.430293
CSS0028656	0	0	0	0	0	0	0	0	0
CSS0041355	0.0404726	0.0328589	0.119954	0.0765449	0.0315393	0.0769093	0.0525755	0.285564	0.716419
CSS0007436	0	0.00127764	0.000776463	0	0	0	0	0	0.00205411
CSS0003993	0.0118247	0.0211627	0.0330364	0.0454153	0.0166774	0.0248524	0.0118352	0.0342177	0.199022
CSS0028941	0.00842287	0.00842358	0.0300833	0.0102587	0.0137559	0.0208705	0.0206419	0.0253278	0.137785
CSS0050330	0.145032	0.301956	0.250375	0.255853	0.118186	0.293874	0.1046	0.228222	1.6981
CSS0030312	0.000314949	0	0	0.00114286	0	0	0	0	0.0014578
CSS0012492	0	0.0036403	0.00349151	0.00478884	0	0.00289135	0	0	0.014812
CSS0000192	0	0	0	0	0	0	0	0	0
CSS0017470	0	0	0	0	0	0	0	0	0
CSS0028470	0.0108464	0.0110958	0.0370258	0.00630234	0.00262024	0.0258065	0.0113286	0.0854286	0.190454
CSS0037536	0	0	0	0	0	0	0	0	0
CSS0014515	0	0.00253974	0.00102303	0	0	0	0	0	0.00356277
CSS0014100	0.00191015	0.00724415	0.00246305	0.00595766	0.00400341	0.00487904	0	0.0310773	0.0575347
CSS0035082	0	0	0.00162096	0.00112359	0	0	0	0	0.00274455
CSS0039118	0.000713242	0.00243267	0	0.000618105	0	0	0	0.0114364	0.0152004
CSS0032041	0	0	0	0	0	0	0	0	0
CSS0040124	0	0.00131067	0	0.00358332	0	0.00561148	0	0	0.0105055
CSS0010528	0	0	0	0	0	0	0	0	0
CSS0037167	0.00104952	0.00246156	0.0067763	0.00596759	0.00319293	0	0.00976708	0.0134613	0.0426763
CSS0022241	0	0	0	0	0	0	0	0	0
CSS0038077	0	0	0	0	0	0	0	0.00547213	0.00547213
CSS0023057	0	0	0	0	0	0	0	0	0
CSS0018465	0.000902225	0.00216816	0.00234789	0.00103601	0.00201219	0	0	0	0.00846648
CSS0048030	0	0.0033454	0	0.00226419	0	0	0	0	0.00560959
CSS0006090	0	0	0	0	0	0	0	0	0
CSS0032106	0.0205546	0.0335903	0.0223868	0.0181895	0.0195338	0.0328486	0.0046268	0.0340755	0.185806
CSS0015904	0.000636735	0.00105339	0.00420826	0.00365284	0	0	0	0.0323687	0.04192
CSS0009368	0.00196843	0.00854855	0.00854523	0.00657771	0	0.0102837	0.00424167	0.0239634	0.0641288
CSS0024208	0.0277201	0.0417436	0.033284	0.0573934	0.0955041	0.0372703	0.014017	0.0639044	0.370837
CSS0011631	0	0	0	0	0	0	0	0	0
CSS0022690	0.139676	0.0719596	0.131099	0.138765	0.0650431	0.177522	0.0975399	0.179545	1.00115
CSS0050389	0.00139035	0	0	0	0	0	0	0	0.00139035
CSS0032097	0.0112125	0.03801	0.0209402	0.0410221	0.0150088	0.0133429	0.0645936	0	0.20413
CSS0002181	0.00109141	0.0012942	0	0	0	0	0	0	0.00238561
CSS0032826	0	0	0.00117497	0.000936536	0.00437977	0	0	0	0.00649127
CSS0004784	0.00299747	0.00114336	0.0059092	0.0118701	0	0.00628209	0.00449141	0	0.0326937
CSS0014147	0	0	0	0.00208635	0	0	0	0	0.00208635
CSS0038147	0	0	0	0	0	0	0	0	0
CSS0034141	0	0	0	0	0	0	0	0	0
CSS0028512	0	0	0.0015528	0.00338281	0	0	0	0	0.00493561
CSS0025234	0.000632808	0.00205339	0.00291816	0	0	0	0	0	0.00560436
CSS0016781	0.000594881	0	0.00228843	0.00094035	0	0.00813001	0	0	0.0119537
CSS0024412	0.00169936	0.00230679	0.00552186	0.00114286	0.0021459	0	0	0	0.0128168
CSS0009861	0	0	0	0	0	0	0	0	0
CSS0002833	0	0	0	0	0	0	0	0	0
CSS0019342	0.00373193	0.00215111	0.00629343	0.002116	0.0021459	0.00430578	0.00763084	0	0.028375
CSS0047978	0.0549343	0.0218416	0.0693147	0.0357885	0	0.0593528	0.0238631	0.0116857	0.276781
CSS0012223	0	0	0	0	0	0	0	0	0
CSS0007816	0.00990748	0.0200543	0.0156065	0.0188384	0.0268204	0.0183816	0.0174328	0.00901066	0.136052
CSS0006634	0	0	0	0	0	0	0	0	0
CSS0029109	0	0	0	0	0	0	0	0	0
CSS0019891	0	0	0	0	0	0	0	0	0
CSS0023038	0	0	0	0	0	0	0	0	0
CSS0010966	0.423727	0.159153	0.250216	0.242326	0.293154	0.199685	0.321716	0.252454	2.14243
CSS0035932	0.00248161	0.000924003	0.000948171	0.00457139	0	0	0.0123544	0	0.0212796
CSS0025419	0	0	0	0	0	0	0	0	0
CSS0019713	0	0	0	0	0	0	0	0	0
CSS0037563	0	0	0	0	0	0	0	0	0
CSS0044490	0.0168211	0.0055034	0.0192007	0.0199536	0.00564342	0.0161963	0.0153606	0.0249191	0.123598
CSS0030557	0	0	0.00430903	0.00389667	0	0	0.0117895	0	0.0199952
CSS0025046	0	0	0	0	0	0	0	0	0
CSS0007407	0.00306865	0.000917847	0.00449609	0.00205959	0	0.00238308	0	0	0.0129253
CSS0019406	0.0552645	0.183521	0.0922433	0.22124	0.100932	0.197806	0.0891115	0.0341433	0.974262
CSS0037102	0.0265493	0.010775	0.0132311	0.0151482	0.00942343	0.010102	0.00424167	0.0107909	0.100262
CSS0027389	0.00399627	0.00233339	0.00504077	0.00554275	0	0.0034379	0.00385077	0.00505241	0.0292543
CSS0003388	0.111974	0.0660641	0.189267	0.146276	0.107845	0.102109	0.113499	0.247585	1.08462
CSS0042382	0	0	0	0	0	0	0	0	0
CSS0043436	0	0	0.00213639	0	0	0	0.00821878	0	0.0103552
CSS0008203	0.174743	0.0527418	0.14998	0.107445	0.0380433	0.109261	0.119463	0.0617934	0.813471
CSS0018958	0.0127202	0.0110807	0.00730289	0.00871941	0	0.00772167	0.0049964	0.0112483	0.0637895
CSS0002704	0	0	0	0	0	0	0	0	0
CSS0019895	0	0	0	0	0	0	0	0	0
CSS0045459	0.0148448	0.00950846	0.0109023	0.0111245	0	0.0084835	0.018057	0.0248774	0.097798
CSS0037070	0	0	0	0	0	0	0	0	0
CSS0016118	0.122771	0.0373814	0.121554	0.0766997	0.0510297	0.0987255	0.0986981	0.114774	0.721634
CSS0005632	0.149393	0.0974022	0.220962	0.246493	0.124314	0.242164	0.32257	0.194658	1.59796
CSS0034636	0	0	0	0	0	0	0	0	0
CSS0014624	0.000610868	0.00868236	0.0030156	0.00349299	0	0	0	0	0.0158018
CSS0016557	0.0233043	0.0894348	0.0283596	0.109227	0.123879	0.0431322	0.0305715	0.0694768	0.517385
CSS0039421	0	0.00128508	0	0	0	0	0	0	0.00128508
CSS0018579	0.0394848	0.0386756	0.0593481	0.0774076	0.142114	0.0563303	0.0266557	0.0223161	0.462332
CSS0034032	0.449725	0.875924	0.404288	0.74344	1.23334	0.478604	0.581579	0.442309	5.20921
CSS0045700	0.00130688	0.002759	0.0062665	0.0011488	0	0.00815737	0.00711169	0	0.0267502
CSS0041551	0	0	0	0	0	0	0	0	0
CSS0020627	0.309099	0.104012	0.382987	0.253656	0.119469	0.29676	0.234494	0.373693	2.07417
CSS0043553	0	0	0	0	0	0	0	0	0
CSS0014675	0.00399499	0.00115176	0.00217214	0.00130382	0	0.00643207	0	0	0.0150548
CSS0025186	0	0	0	0	0	0	0	0	0
CSS0030699	0.100732	0.266294	0.221824	0.714932	0.156269	0.304699	0.499407	0.438227	2.70238
CSS0001880	0	0	0	0	0	0	0	0	0
CSS0044193	0.000909704	0.00574395	0.00173731	0.00633357	0.00185176	0.00684146	0	0.00931534	0.0327331
CSS0045837	0.0316585	0.0394708	0.06869	0.0376158	0.0193424	0.0429906	0.0295437	0.0750197	0.344332
CSS0015323	0.00491098	0.00340399	0.00282714	0.00474689	0.004141	0	0	0	0.02003
CSS0017170	0.083749	0.0182279	0.0540968	0.0542121	0.0454854	0.0690684	0.132328	0.089676	0.546844
CSS0006915	0.00531683	0.002787	0.00209966	0.00593197	0.00677	0	0	0	0.0229055
CSS0037808	0.00409076	0.0209148	0.0138782	0.0143821	0.0087116	0.0269132	0.0664043	0.0111896	0.166485
CSS0008126	0	0	0	0	0	0	0	0	0
CSS0042510	0.00226965	0.00321191	0.00736209	0.0057101	0	0	0.00729703	0.0177564	0.0436072
CSS0006475	0.000453562	0.00420353	0	0.00442016	0	0	0	0.00608131	0.0151586
CSS0004406	0.0016815	0.00256967	0.00198083	0.00173899	0	0	0	0	0.007971
CSS0032224	0	0	0.000813174	0.00104065	0	0	0.0126796	0	0.0145334
CSS0034370	0	0.000611119	0	0	0	0	0	0	0.000611119
CSS0048493	0.218293	0.119394	0.17485	0.230736	0.421788	0.147243	0.092982	0.170556	1.57584
CSS0015450	0	0	0	0	0	0	0	0	0
CSS0016235	0.111479	0.0387611	0.113059	0.0393837	0.0282315	0.0856734	0.00417704	0.0581161	0.47888
CSS0006985	0.0135156	0.00629642	0.0144566	0.00810579	0	0.0158779	0.00539736	0	0.0636497
CSS0025605	0.0108791	0.0112875	0.0107954	0.0117309	0.00716289	0.00721588	0	0	0.0590718
CSS0034473	0	0	0	0	0	0	0	0	0
CSS0044815	0.000915174	0.00216111	0	0	0	0	0	0	0.00307628
CSS0045098	0.0334869	0.0255195	0.221024	0.0112466	0.00818646	0.0735948	0.0457517	0.00425194	0.423062
CSS0006538	0	0	0	0	0	0	0	0	0
CSS0018333	0	0	0	0	0	0	0	0	0
CSS0001468	0	0	0	0	0	0	0	0	0
CSS0021266	0	0	0	0	0	0	0	0	0
CSS0027564	0.00466727	0.00581985	0.00676114	0.0100818	0.0079685	0.00537091	0.0298279	0.0126364	0.0831337
CSS0015496	0.0063766	0.00128508	0	0.00312035	0	0.00360404	0	0.00945717	0.0238432
CSS0020888	0	0	0	0	0	0	0	0	0
CSS0028506	0	0	0	0.000741981	0	0.00300857	0	0	0.00375055
CSS0016928	0.00115624	0.00101225	0.00123636	0.00230425	0	0	0.016573	0	0.0222821
CSS0001679	0.0104123	0.0135924	0.0108913	0.0260208	0.00980078	0.0265729	0.0347265	0.0308153	0.162832
CSS0034101	0	0	0	0.00110902	0	0	0	0	0.00110902
CSS0038180	0.00216064	0.000783404	0.00247282	0.00288808	0	0.0043393	0.00630637	0	0.0189506
CSS0017935	0	0	0	0	0	0	0	0	0
CSS0000739	0.746262	0.49291	0.761461	0.726478	1.32322	0.665774	0.99002	0.550922	6.25705
CSS0030757	0	0	0	0	0	0	0	0	0
CSS0005988	0	0	0	0	0	0	0	0	0
CSS0030602	0	0	0.0048142	0.000856274	0	0	0	0	0.00567047
CSS0009968	0	0	0	0	0	0	0	0	0
CSS0045409	0	0	0	0	0	0	0	0	0
CSS0002942	0.0333535	0.0494629	0.0559187	0.0848012	0.0327701	0.0366965	0.195861	0.0526591	0.541523
CSS0024224	0.0378925	0.0247864	0.0521617	0.0347775	0.0034553	0.0490587	0.0638756	0.0225096	0.288517
CSS0031143	0	0	0	0	0	0	0	0	0
CSS0028778	0	0	0	0	0	0	0	0	0
CSS0007068	0	0	0	0	0	0	0	0	0
CSS0049301	0.0141705	0.0414249	0.00776564	0.0204639	0.0122757	0.0255431	0.0147678	0.00806244	0.144474
CSS0020182	0	0	0	0	0	0	0	0	0
CSS0044441	0.0042376	0.00654071	0.0144561	0.0138841	0.00370674	0.00791558	0.0151305	0.0191491	0.0850205
CSS0004333	0	0	0	0	0	0	0	0	0
CSS0037043	0.00294315	0.00611783	0.00367183	0.00182432	0.00744191	0.00474351	0	0	0.0267425
CSS0044796	0.00146501	0	0	0	0	0	0	0	0.00146501
CSS0037658	0.0519883	0.0251811	0.0515174	0.0188343	0.0124282	0.0277987	0.0330588	0.0235285	0.244335
CSS0048971	0	0	0	0.00107157	0	0	0	0	0.00107157
CSS0026232	0	0	0	0	0	0	0	0	0
CSS0041549	0	0	0	0	0	0	0	0	0
CSS0037649	0	0	0	0	0	0	0	0	0
CSS0024754	0	0	0	0	0	0	0	0	0
CSS0002868	0.00881478	0.0218805	0.0197518	0.0211304	0.0124724	0.0204113	0.00443708	0.0160614	0.12496
CSS0020013	0.922051	0.393688	0.818514	0.655383	0.749682	0.54254	0.747015	0.62474	5.45361
CSS0041877	0.0105281	0.00962669	0.0220172	0.0162913	0.00309662	0.0141658	0.00541044	0.00982889	0.090965
CSS0027839	0	0	0	0	0	0	0	0	0
CSS0018534	0.289962	0.134541	0.456358	0.246455	0.263231	0.194761	0.347708	0.157711	2.09073
CSS0009319	0	0	0	0	0	0	0	0	0
CSS0009920	0	0	0	0	0	0	0	0	0
CSS0042159	0	0	0	0	0	0	0	0	0
CSS0001214	0	0	0	0	0	0	0	0	0
CSS0046349	0.0106973	0.00550349	0.0199668	0.0123851	0.0056224	0.0108419	0.0399865	0.027995	0.132998
CSS0016539	0.00156558	0.00762429	0	0.00181653	0	0.0156146	0	0.0169486	0.0435696
CSS0031683	0	0	0	0	0	0	0	0	0
CSS0012005	0.0575057	0.0531042	0.0342662	0.0766596	0.0215048	0.0378103	0.0522789	0.103732	0.436862
CSS0010494	0.0130149	0.0526389	0.0187529	0.113527	0.104129	0.0293948	0.0106003	0.0441733	0.386231
CSS0027375	0.000833209	0.00131795	0	0.00121791	0	0.00343123	0	0	0.0068003
CSS0014281	0.00724998	0.00577147	0.0160491	0.022689	0	0.016153	0.00728337	0.00619134	0.0813873
CSS0050319	0	0	0	0	0	0	0	0	0
CSS0029725	0	0	0	0	0	0	0	0	0
CSS0022427	0	0	0	0	0	0	0	0	0
CSS0031574	0	0.00112216	0	0	0	0	0	0	0.00112216
CSS0036576	0.0054098	0.000992465	0.00331486	0.00399537	0	0	0	0.0187749	0.0324874
CSS0016343	0	0.00448248	0.00232359	0.0136555	0.00483771	0.02108	0	0.00542736	0.0518067
CSS0032069	0.00481634	0	0.00223475	0.000963299	0	0	0	0.0147027	0.0227171
CSS0049591	0.000575697	0.00128508	0.00066498	0.00276218	0	0	0	0	0.00528794
CSS0027254	0	0	0	0	0	0	0	0	0
CSS0044935	0	0	0	0	0	0	0	0	0
CSS0001997	0.0497949	0.0290313	0.0422325	0.0413586	0.0347773	0.0378102	0.0659726	0.0499174	0.350895
CSS0028217	0.048238	0.0889666	0.0624279	0.0818816	0.0651718	0.12078	0.0904283	0.0789865	0.636881
CSS0004122	0.057165	0.0444884	0.0330981	0.0420498	0.0448936	0.0384487	0.0308334	0.0329181	0.323895
CSS0011317	0.122789	0.0614977	0.183721	0.0980767	0.0786515	0.121572	0.173107	0.177055	1.01647
CSS0012834	0.00695232	0.00565532	0.0254168	0.0139322	0	0.00361326	0.00380814	0.0454531	0.104831
CSS0046677	0.00977727	0.00365948	0.00473373	0.00257912	0	0.0200827	0.0052838	0.00897379	0.0550898
CSS0021486	0	0	0	0	0	0	0	0	0
CSS0023251	0	0	0	0	0	0	0	0	0
CSS0031431	0	0	0	0	0	0	0	0	0
CSS0032508	0.00169213	0.00327006	0.00353348	0.00539118	0	0	0.00404531	0	0.0179322
CSS0037566	0	0.00113464	0.000956625	0	0	0	0	0	0.00209126
CSS0012996	0.00263925	0.00430029	0.000701683	0.00190841	0	0	0.00467578	0.00493875	0.0191642
CSS0015652	0.00835543	0.0108467	0.00998235	0.0335587	0.00517758	0.0330338	0.0420603	0.0439563	0.186971
CSS0022277	0.28611	0.323846	0.344419	0.572073	0.848085	0.371942	0.47653	0.51997	3.74297
CSS0013876	0.00484221	0.00120405	0.00354888	0.00470995	0.00291546	0.00739767	0.00557336	0.00425194	0.0344435
CSS0027938	0	0.00129113	0.00130381	0	0	0	0	0	0.00259495
CSS0027130	0	0	0	0	0	0	0	0	0
CSS0023934	0	0	0	0	0	0	0	0	0
CSS0031327	0	0	0	0	0	0	0	0	0
CSS0011934	0	0	0	0	0	0	0	0	0
CSS0009075	0.00463461	0.00938737	0.00532245	0.0266369	0.0149	0	0.0298811	0.00373116	0.0944936
CSS0012033	0	0	0	0	0	0	0	0	0
CSS0044634	0.0583878	0.0707219	0.120661	0.166138	0.0703978	0.098296	0.183277	0.143425	0.911305
CSS0046493	0	0	0	0	0	0	0	0	0
CSS0030647	0.0451963	0.0447245	0.0512222	0.0928873	0.0746437	0.0641663	0.0812096	0.0856346	0.539685
CSS0047215	0.175662	0.080141	0.312353	0.179399	0.0411632	0.311143	0.15842	0.180353	1.43863
CSS0020425	0.00142212	0	0.00826088	0	0	0	0	0	0.00968301
CSS0001749	0	0	0	0	0	0	0	0	0
CSS0045344	0	0	0	0	0	0	0	0	0
CSS0040736	0	0	0	0	0	0	0	0	0
CSS0046616	0	0	0	0	0	0	0	0	0
CSS0017776	0	0	0	0	0	0	0	0	0
CSS0020222	0.101515	0.0425081	0.150915	0.113934	0.0342091	0.188939	0.0238994	0.0452424	0.701161
CSS0022399	0	0	0	0	0	0	0	0	0
CSS0013609	0	0.00194581	0.00103167	0	0	0.00396171	0.00411354	0.0113693	0.022422
CSS0009038	0	0	0.000962116	0	0	0	0	0	0.000962116
CSS0001191	0	0	0	0	0	0	0	0	0
CSS0033929	0	0	0	0	0	0	0	0	0
CSS0021596	0	0	0	0	0	0	0	0	0
CSS0021563	0	0	0	0	0	0	0	0	0
CSS0037905	0	0	0	0	0	0	0	0	0
CSS0012585	0	0	0	0	0	0	0	0	0
CSS0044049	0	0	0	0	0	0	0	0	0
CSS0026611	0.0110043	0.0172017	0.0268254	0.0248295	0.057395	0.0180673	0.0772493	0.0182782	0.250851
CSS0042937	0.0119512	0.00948712	0.0217008	0.0161022	0.00548838	0.0116422	0.0324697	0.0288214	0.137663
CSS0032843	0	0	0.000859156	0	0	0	0	0	0.000859156
CSS0045669	0.00153039	0	0.00218592	0.0018362	0	0	0	0	0.00555251
CSS0043823	0.00146766	0.00109111	0.0013304	0	0	0	0.00451109	0.019214	0.0276142
CSS0037309	0	0	0	0	0	0	0	0	0
CSS0006811	0.00310534	0.0011382	0.00502019	0	0	0	0	0	0.00926374
CSS0037437	0	0	0	0	0	0	0	0	0
CSS0038916	0.00122858	0.00113413	0	0	0	0	0	0	0.00236271
CSS0011721	0	0	0	0	0	0	0	0	0
CSS0011127	0.0181724	0.00554462	0.0549668	0.00840171	0.014652	0.0282197	0.0270341	0.088838	0.245829
CSS0025338	0.000901173	0	0	0	0	0	0	0	0.000901173
CSS0021696	0	0	0	0	0	0	0	0	0
CSS0029521	0.0300519	0.0434082	0.0439618	0.04738	0.012284	0.0287068	0.0400372	0.089933	0.335763
CSS0047459	0	0	0	0.000843895	0	0	0	0	0.000843895
CSS0024609	0.0255775	0.00812064	0.025906	0.0235518	0.012071	0.00978599	0.0282852	0.0172365	0.150534
CSS0008859	0.0152092	0.0236088	0.0346818	0.0294036	0.00648172	0.0564729	0.0159627	0.0439683	0.225789
CSS0036845	0.00207476	0.00129651	0.00362393	0	0	0	0	0.00535949	0.0123547
CSS0025611	0	0.00195934	0	0.00146992	0	0	0	0	0.00342926
CSS0038936	0.0834659	0.102849	0.11969	0.120608	0.105051	0.137867	0.131551	0.169552	0.970634
CSS0029852	0.0155905	0.0203941	0.0242762	0.0372702	0.0356296	0.0176694	0.0533858	0.045606	0.249822
CSS0018227	0.00934449	0.0167778	0.00707067	0.0153911	0.0206996	0.010724	0	0.0288267	0.108834
CSS0034044	0.0517832	0.0394703	0.0693973	0.0329537	0.0496414	0.0431528	0.100442	0.0517756	0.438616
CSS0021644	0	0	0	0	0	0	0	0	0
CSS0037967	0	0	0.000879169	0	0	0	0	0	0.000879169
CSS0033101	0	0	0.000920341	0	0	0.00469729	0	0	0.00561763
CSS0047551	0	0	0	0	0	0	0	0	0
CSS0044416	0.0360314	0.0461994	0.0334873	0.0545436	0.0535109	0.0414832	0.0341287	0.1198	0.419185
CSS0041522	0.0364346	0.0620195	0.073113	0.109006	0.054346	0.063975	0.0580405	0.127615	0.58455
CSS0041140	0.0336848	0.0310848	0.0576846	0.0433384	0.0491703	0.0720233	0.0348997	0.0692694	0.391155
CSS0040075	0	0	0	0.000801448	0	0	0	0	0.000801448
CSS0012054	0.0375192	0.0984807	0.036677	0.153087	0.348622	0.0256839	0.0860049	0.0570863	0.843161
CSS0046636	0	0	0	0	0	0	0	0	0
CSS0001134	0	0	0	0	0	0.00282542	0	0	0.00282542
CSS0039916	0.3668	0.0931202	0.311069	0.187764	0.0630496	0.348572	0.1189	0.272803	1.76208
CSS0035559	0	0	0	0	0	0	0	0	0
CSS0036066	0	0	0	0	0	0	0	0	0
CSS0025765	0	0	0	0	0	0	0	0	0
CSS0047871	0.00148506	0.00344857	0.00104138	0	0	0	0.00411354	0	0.0100886
CSS0049855	0.00378697	0.00210707	0.0046341	0	0.00780152	0.00251534	0.00703768	0.00689456	0.0347772
CSS0000419	0	0	0	0	0	0	0	0	0
CSS0011538	0.0104139	0.00560556	0.0161676	0.010242	0	0.00890979	0.00688192	0.00651615	0.0647369
CSS0008777	0.0113427	0.031096	0.0379846	0.0331441	0.0258856	0.0193661	0.0122932	0.0216553	0.192768
CSS0037744	0.000463842	0.000727004	0.000849539	0	0	0	0	0	0.00204039
CSS0021510	0.00300935	0.00369844	0.00303535	0	0.00552536	0	0	0	0.0152685
CSS0037755	0.00346293	0.0278225	0.00907235	0.0209735	0.00819275	0.0179118	0.00560776	0.0261089	0.119153
CSS0043391	0.000820048	0	0	0	0	0	0	0	0.000820048
CSS0043141	0.00255623	0.000987008	0.00164821	0.000711342	0	0.00376275	0	0	0.00966554
CSS0046503	0.00325209	0.0158392	0.0160713	0.0180773	0.00258518	0.0224524	0.0158751	0.035205	0.129358
CSS0040001	0	0	0.00202964	0	0	0	0	0	0.00202964
CSS0030218	0	0	0	0	0	0	0	0	0
CSS0035319	0.0370652	0.0394389	0.0563431	0.0774496	0.0182013	0.0786445	0.0431632	0.064077	0.414383
CSS0020442	0.00134523	0.0011049	0.0198455	0	0	0	0	0.00449815	0.0267938
CSS0027531	0.00147431	0.000944659	0.00086686	0	0	0.00289332	0	0	0.00617914
CSS0047385	0	0	0	0	0	0	0	0	0
CSS0034146	0.00282183	0	0.001498	0.000736274	0	0	0	0	0.0050561
CSS0002587	0	0	0	0	0	0	0	0	0
CSS0011515	0.0122131	0.00596686	0.0142788	0.0216048	0.00400341	0.0207504	0.00729703	0.0388785	0.124993
CSS0017113	0	0	0	0.00110902	0	0	0	0	0.00110902
CSS0026246	0	0	0	0	0	0	0	0	0
CSS0028368	0.0292912	0.0996579	0.0652884	0.0894904	0.132738	0.0595825	0.0393777	0.0637865	0.579213
CSS0033424	0.000656169	0.00117871	0	0	0	0	0	0.00588508	0.00771997
CSS0026590	0	0	0	0	0	0	0	0	0
CSS0014243	0	0	0	0	0	0	0	0	0
CSS0032629	0	0	0	0	0	0	0	0	0
CSS0015835	0.001712	0.0171433	0.00546712	0.0123933	0.00662496	0.00503465	0.0195402	0.0243262	0.0922417
CSS0023550	0	0	0.000862418	0	0	0	0	0.00487891	0.00574133
CSS0007007	0	0	0	0	0	0	0	0	0
CSS0044385	0	0.00328842	0.00142461	0.00100341	0	0	0	0.0111165	0.016833
CSS0013878	0.0135961	0.00759275	0.00823214	0.0105801	0.00256896	0.00766847	0	0.011423	0.0616615
CSS0045835	0.00139798	0.000729919	0.00118476	0.0027394	0	0.00271567	0	0.00827031	0.017038
CSS0039219	0	0	0.00328156	0	0	0	0	0	0.00328156
CSS0014205	0.000773434	0.000918125	0.0140979	0.00408937	0	0.0046956	0	0.0204236	0.044998
CSS0024015	0	0	0	0	0	0	0	0	0
CSS0044504	0	0	0.00120984	0	0	0	0.00828677	0	0.00949661
CSS0023737	0	0	0	0	0	0	0	0	0
CSS0019451	0.00141107	0.00251517	0.00143748	0	0.00219139	0	0	0	0.00755512
CSS0039644	0	0	0	0	0	0	0	0	0
CSS0044531	0	0	0.00470417	0.00113257	0	0	0.00763084	0	0.0134676
CSS0027867	0.0112942	0.000964716	0.0161278	0.00114286	0	0.00871103	0.0327991	0	0.0710397
CSS0050441	0.360407	0.232515	0.276073	0.236728	0.266343	0.210944	0.296965	0.264187	2.14416
CSS0008920	0.465125	0.2958	0.363697	0.340875	0.538612	0.311634	0.492292	0.445518	3.25355
CSS0028360	0.00751063	0.020577	0.0252607	0.0264749	0.0148185	0.0364376	0.032392	0.052542	0.216013
CSS0010804	0.0251939	0.00487121	0.0479564	0.0142357	0.00667047	0.00934965	0.0272784	0.021994	0.15755
CSS0008059	0	0	0	0	0	0	0	0	0
CSS0019507	0.103259	0.181362	0.172066	0.2138	0.147843	0.195935	0.124075	0.167773	1.30611
CSS0008415	0	0	0	0	0	0	0	0	0
CSS0023892	0.000640153	0	0.001658	0	0	0	0	0	0.00229815
CSS0001892	0.0296215	0.0146366	0.0273017	0.0262055	0.0191193	0.026676	0.0168482	0	0.160409
CSS0025042	0	0	0	0	0	0	0	0	0
CSS0021721	0.00173816	0.00455035	0.00369084	0.00437504	0	0	0.00765514	0.00798117	0.0299907
CSS0012973	0	0	0	0	0	0	0	0	0
CSS0034618	0.000632808	0	0	0.000688979	0	0	0	0	0.00132179
CSS0046470	0.0194999	0.0153197	0.0153055	0.0223303	0.0209956	0.0293158	0.034272	0.0440473	0.201086
CSS0002003	0.0169743	0.0103325	0.0129	0.0109676	0.0174454	0.00925052	0	0.0231665	0.101037
CSS0003386	0	0	0	0	0	0	0	0	0
CSS0021659	0.0281466	0.0761032	0.0687337	0.249127	0.184564	0.177471	0.0316145	0.0749767	0.890737
CSS0015015	0.0035245	0.00443622	0.00689338	0.00284053	0	0.00311347	0.00722178	0.0127322	0.0407621
CSS0049418	0.00359596	0.0142504	0.00513743	0.023376	0.0161773	0.0119152	0	0.00408853	0.0785408
CSS0027334	0.232821	0.178939	0.23574	0.326128	0.382005	0.174767	0.523377	0.210841	2.26462
CSS0015273	0.000663854	0.00115229	0	0.000748611	0	0	0	0	0.00256476
CSS0017473	0	0	0	0	0	0	0	0	0
CSS0039971	0	0	0	0	0	0	0	0	0
CSS0023800	0.00622612	0.00885075	0.00652063	0.00344163	0.00696398	0	0	0.00487891	0.036882
CSS0001280	0.0484595	0.00178245	0.0336804	0.00718976	0	0.0163537	0	0.00803122	0.115497
CSS0045988	0	0.00100613	0.00084057	0	0	0	0.00541044	0	0.00725714
CSS0039035	0.0014631	0.00111487	0	0	0	0	0	0.0591202	0.0616981
CSS0049068	0.00142085	0.006727	0.00922427	0.00265518	0.00509174	0.00242333	0.00922225	0.0224759	0.0592405
CSS0003027	0	0	0	0	0	0	0	0	0
CSS0048696	0	0	0	0	0	0	0	0	0
CSS0015141	0.0130828	0.00278194	0.0233187	0.00681017	0.00467506	0.0185768	0.00565822	0	0.0749037
CSS0042134	0	0	0	0	0	0	0	0	0
CSS0013219	0.0249988	0.0426463	0.0433429	0.0426405	0.0101034	0.0370373	0.0334741	0.0877341	0.321977
CSS0022310	0	0	0	0	0	0	0	0	0
CSS0036480	0.00306464	0.00132371	0.00303053	0.005698	0	0.00866528	0.0073029	0.0114723	0.0405574
CSS0036807	0.000700187	0	0	0.00144292	0	0	0	0	0.00214311
CSS0031787	0.0128112	0.0126828	0.018928	0.0286877	0.00656263	0.0183809	0.0208924	0.0162422	0.135188
CSS0012231	0.0387525	0.0161115	0.0481999	0.0538083	0.047516	0.0144757	0.0444456	0.0472234	0.310533
CSS0039093	0.0103521	0.00561032	0.0104143	0.0125596	0	0.00753893	0.0126343	0.0192607	0.0783703
CSS0050242	0.0215348	0.0127217	0.0122313	0.0285498	0.00584011	0.0238627	0.0141343	0.0223802	0.141255
CSS0028208	0	0	0	0	0	0	0	0	0
CSS0027181	0	0	0	0	0	0	0	0	0
CSS0024761	0	0	0	0	0	0	0	0	0
CSS0040779	0	0	0	0	0	0	0	0	0
CSS0018890	0.00237479	0	0	0	0.00402709	0	0	0	0.00640188
CSS0033291	0.0156646	0.0210748	0.0496352	0.0587936	0.00972189	0.0646465	0.159345	0.0167711	0.395652
CSS0022329	0	0	0	0	0	0	0	0	0
CSS0025696	0	0	0	0	0	0	0	0	0
CSS0014451	0	0	0	0	0	0	0	0	0
CSS0007321	0	0	0	0	0	0	0	0	0
CSS0023131	0	0	0	0	0	0	0	0	0
CSS0012032	0.0887049	0.0588956	0.0999597	0.112602	0.202907	0.0639415	0.0922188	0.070504	0.789733
CSS0020096	0	0	0	0	0	0	0	0	0
CSS0005952	0.0599261	0.0956391	0.0761624	0.113382	0.0823406	0.0773688	0.110112	0.0957733	0.710705
CSS0013854	0	0	0	0	0	0	0	0	0
CSS0043531	0.169571	0.0969979	0.226584	0.178114	0.182875	0.144518	0.310068	0.234931	1.54366
CSS0049025	0	0	0	0	0	0	0	0	0
CSS0035128	0	0	0	0	0	0	0	0	0
CSS0029882	0	0	0	0	0	0	0	0	0
CSS0005131	0	0	0	0	0	0	0	0	0
CSS0001763	0.0153577	0.00334773	0.00466535	0	0	0.00360404	0.0113109	0	0.0382857
CSS0006402	0	0	0	0	0	0	0	0	0
CSS0004133	0	0	0	0	0	0	0	0	0
CSS0004613	0.000827546	0	0.000742282	0	0	0	0	0	0.00156983
CSS0049847	0.0175402	0.00885138	0.0112101	0.0186744	0.0107387	0.00354113	0.0184918	0.0329226	0.12197
CSS0020034	0	0	0	0	0	0	0	0	0
CSS0021631	0.0674527	0.0422045	0.0779771	0.0810777	0.0963024	0.0698537	0.0836548	0.0524786	0.571001
CSS0038258	0.0390585	0.0287963	0.0337395	0.041403	0.0241948	0.0456108	0.0511284	0.0655626	0.329494
CSS0009615	0	0	0	0	0	0	0	0	0
CSS0010349	0.000827947	0.00255828	0	0.000796792	0.00378969	0	0	0	0.00797271
CSS0035758	0	0	0	0	0	0	0	0	0
CSS0021688	0	0.000826242	0	0	0	0.00330621	0	0	0.00413245
CSS0015460	0	0	0	0	0	0	0	0	0
CSS0024711	0.00142789	0	0.00141504	0.00121068	0.00255562	0	0.0189005	0	0.0255097
CSS0044138	0	0	0	0	0	0	0	0	0
CSS0047693	0	0	0	0	0	0	0	0	0
CSS0039270	0.0545324	0.0130269	0.0397101	0.0224002	0.00771232	0.0494521	0.0164947	0.00668728	0.210016
CSS0005734	0	0	0	0	0	0	0	0	0
CSS0029398	0.00681425	0.00613294	0.00391695	0.01499	0.00355053	0	0.0306632	0.00391016	0.069978
CSS0040202	0.000720298	0	0	0	0	0	0	0.00619134	0.00691164
CSS0002224	0	0	0	0	0	0	0	0	0
CSS0026507	0	0	0	0.000881145	0.00309802	0	0	0	0.00397917
CSS0035544	0	0	0	0	0	0	0	0	0
CSS0009784	0	0	0	0	0	0	0	0	0
CSS0046327	0.00141568	0.0036434	0.00269706	0.000660051	0.00246415	0	0.00869298	0.0152263	0.0347997
CSS0000437	0	0	0	0	0	0	0	0	0
CSS0022568	0	0.00126963	0	0	0	0	0	0	0.00126963
CSS0049015	0.000753366	0.000942567	0.000955536	0.00447003	0	0.00539482	0	0.00830101	0.0208173
CSS0032946	0.0279968	0.0256837	0.0714479	0.0582862	0.00879182	0.0472643	0.0412751	0.0217404	0.302486
CSS0047431	0	0	0.00195164	0	0	0	0	0	0.00195164
CSS0018355	0	0	0	0	0	0	0	0	0
CSS0033173	0	0.00101262	0.00183081	0	0.00257075	0	0	0	0.00541418
CSS0048540	0	0	0	0	0	0	0	0	0
CSS0025994	0	0	0	0.000885657	0	0	0	0	0.000885657
CSS0038479	0.00195088	0.00328072	0.00380913	0.00245755	0	0.00408803	0	0.0168634	0.0324497
CSS0036008	0	0	0	0	0	0	0	0	0
CSS0030720	0	0	0	0	0	0	0	0	0
CSS0007669	0	0	0	0	0	0	0	0	0
CSS0028524	0.114422	0.0842998	0.332718	0.118568	0.029441	0.160028	0.105442	0.0790062	1.02392
CSS0037735	0	0.00321809	0	0	0	0	0	0	0.00321809
CSS0017180	0	0	0.00148903	0.00217953	0	0.00344535	0	0	0.0071139
CSS0039567	0	0	0	0	0	0	0	0	0
CSS0025624	0	0	0	0	0	0	0	0	0
CSS0003161	0	0	0	0	0	0	0	0	0
CSS0005965	0.00079201	0	0.00503541	0	0	0	0	0	0.00582742
CSS0002852	0	0	0	0	0	0	0	0	0
CSS0036373	0	0	0.00409257	0	0	0	0	0	0.00409257
CSS0029132	0	0	0	0	0	0	0	0	0
CSS0030104	0	0.00131389	0.00178551	0.00212658	0	0	0	0	0.00522598
CSS0003427	0.00934356	0.00820211	0.019187	0.0175339	0.0046322	0	0.0163425	0	0.0752412
CSS0046030	0	0	0.000786926	0	0	0	0	0	0.000786926
CSS0039364	0.0582548	0.0495638	0.075436	0.0842361	0.0401858	0.0776933	0.0478627	0.143864	0.577097
CSS0034734	0.00389144	0.00224056	0.0084464	0.0024009	0	0	0	0	0.0169793
CSS0034952	0	0	0	0	0.00309802	0	0	0	0.00309802
CSS0003777	0	0	0	0	0	0	0	0	0
CSS0002800	0.0202883	0.0185628	0.0278749	0.0255318	0.00372136	0.0770879	0.00573221	0.0869451	0.265744
CSS0047893	0.00338891	0.00460823	0.00383676	0.0135476	0.00846811	0.00255343	0	0.0174398	0.0538428
CSS0041904	0	0	0	0	0	0	0	0	0
CSS0013976	0	0	0	0	0	0.00311347	0	0	0.00311347
CSS0048026	0	0	0	0	0	0	0	0	0
CSS0024554	0	0	0	0	0	0	0	0	0
CSS0008596	0	0.00128659	0	0	0	0	0	0	0.00128659
CSS0036030	0	0	0	0	0	0	0	0	0
CSS0034681	0	0	0	0.00110152	0	0	0	0	0.00110152
CSS0006396	0	0.000807652	0	0	0	0	0	0	0.000807652
CSS0037853	0	0	0	0	0	0	0	0	0
CSS0043841	0	0	0	0	0	0	0	0	0
CSS0036217	0	0	0	0	0	0	0	0	0
CSS0026930	0	0	0	0	0	0	0	0	0
CSS0033235	0	0	0	0	0	0	0	0	0
CSS0041927	0	0	0	0	0	0	0	0	0
CSS0048677	0	0	0.00140419	0	0	0	0	0	0.00140419
CSS0021248	0	0	0	0	0	0	0	0	0
CSS0027305	0	0	0	0	0	0	0	0	0
CSS0034131	0	0	0	0	0	0	0	0	0
CSS0015030	0	0	0	0	0	0	0	0	0
CSS0010579	0.00144144	0.00120162	0	0.00114089	0	0	0	0	0.00378395
CSS0041620	0.0906007	0.221324	0.0540423	0.0736372	0.0974003	0.0450111	0.0901063	0.0573388	0.729461
CSS0042870	0	0	0	0	0	0	0	0	0
CSS0004238	0	0	0	0	0	0	0	0	0
CSS0016914	0	0	0	0	0	0	0	0	0
CSS0012945	0	0	0	0	0	0	0	0	0
CSS0027307	0	0	0	0	0	0	0	0	0
CSS0017209	0.0113578	0.0141947	0.0190927	0.0167961	0.00363274	0.0254412	0.0272152	0.0298772	0.147608
CSS0019853	0	0	0	0	0	0	0	0	0
CSS0000749	0	0	0	0	0	0	0	0	0
CSS0044354	0.0199954	0.00651319	0.0234908	0.0260099	0.00376732	0.0136242	0.0144444	0.0578798	0.165725
CSS0031235	0.0204599	0.0141864	0.0239236	0.0174124	0.0169581	0.0210621	0.0286691	0.00439174	0.147063
CSS0032831	0	0	0	0	0	0	0	0	0
CSS0029391	0	0	0.00266886	0	0	0.0027289	0	0	0.00539777
CSS0022796	0	0	0.00239262	0.00137192	0	0	0	0.00422664	0.00799118
CSS0008672	0	0	0	0	0	0	0	0	0
CSS0030653	0	0	0	0	0	0	0	0	0
CSS0034770	0	0	0	0	0	0	0	0	0
CSS0046760	0.00289031	0	0.0302231	0.00181781	0	0	0.00424167	0	0.0391729
CSS0009642	0.00203547	0.00120772	0.0022357	0.00113866	0	0	0	0.0188915	0.0255091
CSS0005962	0	0	0	0	0	0	0	0	0
CSS0038154	0.000688714	0	0	0	0	0	0	0	0.000688714
CSS0017195	0.00238917	0.0048553	0.00066721	0.0033944	0	0.00256307	0	0.00778212	0.0216513
CSS0020690	0	0	0.00437586	0	0	0	0	0	0.00437586
CSS0038385	0	0	0	0	0	0	0	0	0
CSS0033601	0	0	0	0	0	0	0	0	0
CSS0001047	0	0	0	0	0	0	0	0	0
CSS0049382	0.00140932	0.000823311	0.00437228	0.00200665	0	0.00622031	0	0.00986142	0.0246933
CSS0043130	0.003885	0.00263589	0.0124511	0.00154604	0	0.00222739	0	0	0.0227454
CSS0009552	0	0	0	0	0	0	0	0	0
CSS0016598	0	0	0	0	0	0	0	0	0
CSS0006841	0.0129456	0.0634637	0.0240198	0.032278	0.0342613	0.0287701	0.00882418	0.176802	0.381365
CSS0013386	0	0	0	0	0	0	0	0	0
CSS0045661	0	0	0	0	0	0	0	0	0
CSS0007527	0.00166703	0.00214901	0.0106159	0	0	0.00565574	0.0046268	0.00423468	0.0289492
CSS0011978	0.00311982	0.0127941	0.0139417	0.00948395	0.00191844	0.0170501	0.00865513	0.00476614	0.0717294
CSS0025400	0.0045234	0.0022603	0	0	0.00297438	0.00291064	0	0.0143369	0.0270056
CSS0033796	0.00718248	0.014822	0.00421391	0.0154602	0.0103662	0.00622793	0.0159306	0.0107281	0.0849314
CSS0042861	0	0	0	0	0	0	0	0	0
CSS0040390	0	0	0	0	0	0	0	0	0
CSS0012571	0	0	0	0	0	0	0	0	0
CSS0046669	0.019611	0.0789462	0.0216803	0.0668806	0.0907117	0.029113	0.0213525	0.17774	0.506035
CSS0016909	0.00535858	0.00131714	0.00842822	0.00142585	0	0	0	0	0.0165298
CSS0006316	0.0748762	0.0384079	0.025274	0.0731287	0.142694	0.044903	0.0906106	0.0727671	0.562662
CSS0048611	0.00194289	0.00199981	0.00219925	0.0214756	0.00311287	0.00820332	0	0.00983566	0.0487694
CSS0014480	0.0111099	0.0491933	0.0348903	0.0655913	0.0588935	0.0354035	0.068225	0.0444138	0.367721
CSS0035105	0	0.00241218	0.00120047	0.00309721	0	0	0.0057876	0.0141227	0.0266201
CSS0015283	0	0	0	0	0	0	0	0	0
CSS0038173	0	0	0	0	0	0	0	0	0
CSS0014800	0.0334546	0.0171712	0.0172763	0.01546	0.0141951	0.0329184	0.0233169	0.022074	0.175867
CSS0009628	0.0297286	0.0115693	0.0281375	0.0223314	0.0108108	0.01142	0.0629983	0.0350629	0.212059
CSS0018888	0	0	0	0	0	0	0	0	0
CSS0037110	0	0	0.00349488	0.00239512	0	0	0	0.00423468	0.0101247
CSS0025143	0.00886592	0.00600917	0.0147158	0.0122907	0.0134939	0.00801543	0	0.0202951	0.083686
CSS0018778	0	0	0	0	0	0	0	0	0
CSS0023880	0.00132432	0	0	0.000923636	0	0	0	0	0.00224796
CSS0015254	0	0	0	0	0	0	0	0	0
CSS0021935	0.00830612	0.00978236	0.0155823	0.00835784	0.00639269	0.00774294	0.023718	0.0170211	0.0969033
CSS0021282	0.00197391	0.000902133	0.0047096	0.00205984	0	0.00278606	0	0	0.0124315
CSS0008101	0	0	0	0	0	0	0	0	0
CSS0032007	0	0	0	0	0	0	0	0	0
CSS0039698	0	0	0	0	0	0	0	0	0
CSS0006987	0	0	0	0	0	0	0	0	0
CSS0038846	0	0	0	0	0	0	0	0	0
CSS0038045	0	0.00115765	0	0	0	0	0	0	0.00115765
CSS0036282	0	0	0	0	0	0	0	0	0
CSS0037765	0	0	0	0	0	0	0	0	0
CSS0004571	0	0.0010309	0	0	0	0	0	0	0.0010309
CSS0050007	0	0	0	0	0	0	0	0	0
CSS0036047	0	0	0	0	0	0	0	0	0
CSS0002965	0	0	0	0	0	0	0	0	0
CSS0048011	0	0	0	0	0	0	0	0	0
CSS0040084	0	0	0	0	0	0	0	0	0
CSS0001381	0	0	0	0	0	0	0	0	0
CSS0048043	0	0	0	0	0	0	0	0	0
CSS0000331	0	0	0	0	0	0	0	0	0
CSS0041063	0	0	0	0.000782388	0	0	0	0	0.000782388
CSS0003851	0	0	0	0	0	0	0	0	0
CSS0021607	0	0	0	0	0	0	0	0	0
CSS0041915	0	0	0	0	0	0	0	0	0
CSS0045832	0.000541534	0.000849344	0.00206657	0.00102557	0.00461748	0	0.00424167	0	0.0133422
CSS0036629	0.00930504	0.00211733	0.0115147	0	0.00395854	0.00705604	0.00839601	0.0123358	0.0546835
CSS0041752	0	0	0.000953366	0	0	0	0	0	0.000953366
CSS0025248	0.398909	0.1567	0.585256	0.229987	0.142457	0.251488	0.173218	0.550578	2.48859
CSS0000448	0	0	0	0	0	0	0	0	0
CSS0033468	0.0150452	0.0119727	0.0261253	0.0125271	0.014208	0.0182454	0.0341967	0.0657638	0.198084
CSS0049919	0	0	0	0.00111903	0	0	0	0	0.00111903
CSS0022596	0	0	0	0	0	0	0	0	0
CSS0044607	0	0	0	0	0	0	0	0	0
CSS0002083	0	0	0	0	0	0	0	0	0
CSS0028391	0	0	0	0	0	0	0	0	0
CSS0029010	0	0	0	0	0	0	0	0	0
CSS0008514	0.00220568	0	0.0021955	0	0	0	0	0.0173333	0.0217344
CSS0010919	0	0	0	0	0	0	0	0	0
CSS0049045	0	0	0	0	0	0	0	0	0
CSS0032600	0.00156116	0.00119502	0	0	0	0	0.0103262	0	0.0130824
CSS0020962	0	0	0	0	0	0	0	0	0
CSS0021749	0	0	0	0	0	0	0	0	0
[truncated: 48,526 more rows]

## Sheet: Pearson_data_groupby_clusters
Person	Cluster 1	Cluster 2	Cluster 3	Cluster 4	Cluster 5	Cluster 6	Cluster 7	Cluster 8
Cluster 1	1	0.873266	0.919508	0.844577	0.833708	0.887754	0.884843	0.845564
Cluster 2	0.873266	1	0.900716	0.946768	0.932467	0.926354	0.902338	0.916979
Cluster 3	0.919508	0.900716	1	0.929516	0.849763	0.964744	0.91559	0.917475
Cluster 4	0.844577	0.946768	0.929516	1	0.925452	0.94309	0.920651	0.927071
Cluster 5	0.833708	0.932467	0.849763	0.925452	1	0.87077	0.893771	0.86397
Cluster 6	0.887754	0.926354	0.964744	0.94309	0.87077	1	0.909375	0.936455
Cluster 7	0.884843	0.902338	0.91559	0.920651	0.893771	0.909375	1	0.892002
Cluster 8	0.845564	0.916979	0.917475	0.927071	0.86397	0.936455	0.892002	1
