# Supplementary material for: Root-specific theanine metabolism and regulation at the single-cell level in tea plants (Camellia sinensis)
Source: eLife. 2024 Oct 14;13:RP95891. doi: 10.7554/eLife.95891 (PMC11473105; doi:10.7554/eLife.95891)
Supplement: Supplementary file 3. [file elife-95891-supp3.xlsx]

## Sheet: Marker gene
Cell type	Gene name	Gene ID
Epidermis	CsGL3	CSS0032319
Cortex/Endodermis	CsSCR	CSS0026522
Cortex/Endodermis	CsAAP1	CSS0035405
Quiescent center	CsWOX5	CSS0035102
Pericycle	CsLHW	CSS0013678
Vasculature/Xylem	CsWAT1	CSS0014004
Xylem	CsIRX9	CSS0005895
Phloem	CsPP2	CSS0016108

## Sheet: Top 10 marker gene
Gene ID	p_val	avg_logFC	pct.1	pct.2	p_val_adj	Cell cluster	gene_diff	Description	Symbol
CSS0032777	0	1.24485	0.583	0.277	0	1	2.105	Major allergen pru ar 1	MAPA1
CSS0035147	0	1.22047	0.568	0.259	0	1	2.193	Universal stress protein A-like protein	USP
CSS0004539	8.78152e-305	1.02082	0.547	0.267	4.43686e-300	1	2.049	Hypothetical protein JCGZ_10029	Unknown
CSS0029741	1.21091e-260	1.03252	0.498	0.243	6.1181e-256	1	2.049	Uncharacterized protein TCM_006292	Unknown
CSS0044578	2.07038e-216	1.05559	0.353	0.152	1.04606e-211	1	2.322	Unnamed protein product	Unknown
CSS0049187	5.83148e-191	0.87064	0.346	0.179	2.94635e-186	1	1.933	Misfolded protein sensing RING E3 ligase 1	MPSR1
CSS0025407	2.44358e-176	0.956077	0.261	0.096	1.23462e-171	1	2.719	Polygalacturonase inhibiting protein 1	PGIP1
CSS0022866	1.69321e-175	0.860579	0.302	0.159	8.55493e-171	1	1.899	Photosystem I reaction center subunit VI-2, chloroplastic-like	PSAH2
CSS0028933	1.38316e-174	0.954558	0.353	0.188	6.98844e-170	1	1.878	Pathogenesis-related protein PR-4-like	PR4
CSS0014004	3.40179e-147	0.907171	0.344	0.184	1.71875e-142	1	1.87	WALLS ARE THIN 1	WAT1
CSS0011466	8.4352e-292	1.20056	0.587	0.367	4.26188e-287	2	1.599	Peroxidase 15	PER15
CSS0029813	6.30192e-265	1.16777	0.53	0.339	3.18405e-260	2	1.563	Probable calcium-binding protein CML45	CML45
CSS0013370	1.04958e-202	1.19643	0.389	0.216	5.30302e-198	2	1.801	Laccase-7 like	LAC7
CSS0030098	1.65523e-191	1.23959	0.39	0.203	8.36307e-187	2	1.921	Probable pectinesterase/pectinesterase inhibitor 41	PME41
CSS0013223	3.09372e-183	0.854287	0.498	0.315	1.5631e-178	2	1.581	Endochitinase EP3	EP3
CSS0027985	3.95694e-154	0.85485	0.27	0.15	1.99924e-149	2	1.8	ABC transporter A family member 7 like	ABC transporter
CSS0020384	1.46219e-144	0.83034	0.27	0.162	7.3877e-140	2	1.667	Cellulose synthase-like protein/Root hair defective 7	RHD7
CSS0007581	4.06366e-141	0.845981	0.423	0.259	2.05316e-136	2	1.633	Unnamed protein product	Unknown
CSS0047380	2.56974e-133	0.895475	0.252	0.12	1.29836e-128	2	2.1	Cytochrome P450 87A3-like	CYP87A3
CSS0002951	6.99785e-110	0.694061	0.337	0.216	3.53567e-105	2	1.56	Polyphenol oxidase	PPO
CSS0035324	0	1.61409	0.444	0.05	0	3	8.88	Polyubiquitin 10	UBQ10
CSS0045258	0	1.25214	0.384	0.029	0	3	13.241	B2 protein	B2-1
CSS0000733	8.91512e-245	0.989454	0.294	0.026	4.50436e-240	3	11.308	ERF transcription factor 2	ERF2
CSS0018263	3.92712e-241	0.783859	0.319	0.041	1.98418e-236	3	7.78	R3H domain-containing protein	R3H
CSS0040758	2.65057e-188	1.06838	0.307	0.05	1.3392e-183	3	6.14	Expansin-like B1	EXLB1
CSS0034421	2.38895e-180	1.25521	0.395	0.095	1.20702e-175	3	4.158	Small heat shock protein 17.2	HSP17.2
CSS0018893	5.93286e-161	0.721456	0.269	0.044	2.99758e-156	3	6.114	Retrotransposon-like protein 1	RTL1
CSS0028699	3.62713e-134	0.753407	0.257	0.046	1.83261e-129	3	5.587	Desumoylating isopeptidase 1	DESI1
CSS0042387	2.18929e-128	0.599389	0.272	0.062	1.10614e-123	3	4.387	Ketol-acid reductoisomerase, chloroplastic	KARI
CSS0037885	1.00986e-100	0.654325	0.255	0.066	5.10232e-96	3	3.864	Plasmodesmata-located protein 6	PDLP6
CSS0019367	2.68283e-212	0.971023	0.495	0.132	1.3555e-207	4	3.75	Galactinol synthase 2	GolS2
CSS0048516	1.04348e-187	0.794612	0.425	0.108	5.27219e-183	4	3.935	Glutaredoxin-C9	GRX-C9
CSS0015685	8.32115e-170	0.522106	0.327	0.082	4.20426e-165	4	3.988	Splicing factor YJU2	YJU2
CSS0030699	1.06571e-149	0.677609	0.351	0.091	5.38452e-145	4	3.857	Auxin-responsive protein SAUR32	SAUR32
CSS0028487	1.98115e-147	0.688433	0.32	0.075	1.00098e-142	4	4.267	Indole-3-acetic acid-amido synthetase GH3.6	GH3.6
CSS0043882	4.90363e-136	0.616074	0.318	0.081	2.47756e-131	4	3.926	Probable protein phosphatase 2C 25	PP2C-25
CSS0049167	5.19219e-132	0.813533	0.344	0.093	2.62335e-127	4	3.699	Calcium-binding protein PBP1-like	CABP
CSS0026515	5.5829e-122	0.505826	0.27	0.069	2.82076e-117	4	3.913	Unnamed protein product	Unknown
CSS0024991	1.34941e-114	0.483102	0.259	0.069	6.8179e-110	4	3.754	OTU domain-containing protein DDB_G0284757	Unknown
CSS0040176	3.43826e-108	0.708801	0.274	0.069	1.73718e-103	4	3.971	Adenine nucleotide transporter BT1, chloroplastic/mitochondrial	ANT
CSS0022667	1.23965e-104	1.21628	0.557	0.172	6.26334e-100	5	3.238	Protein CDI like	CDI
CSS0037698	5.79967e-90	1.21863	0.417	0.105	2.93028e-85	5	3.971	Short-chain dehydrogenase/reductase SDR	SDRd
CSS0012697	2.31619e-81	1.12159	0.378	0.088	1.17025e-76	5	4.295	Mitochondrial import inner membrane translocase subunit TIM17-2-like	TIM17-2
CSS0009759	1.34155e-79	1.11961	0.45	0.14	6.77819e-75	5	3.214	CBL-interacting serine/threonine-protein kinase 11	CIPK11
CSS0003506	3.1584e-68	1.04239	0.346	0.095	1.59578e-63	5	3.642	B2 protein	B2-2
CSS0030452	4.85578e-67	1.06575	0.408	0.131	2.45338e-62	5	3.115	ABC transporter I family member 19	ABC transporter
CSS0044222	2.72499e-65	0.964413	0.36	0.103	1.3768e-60	5	3.495	Profilin-1	PRF5
CSS0033421	9.23828e-48	0.875566	0.276	0.069	4.66764e-43	5	4	WRKY transcription factor 30	WRKY30
CSS0049938	3.15744e-42	0.841679	0.285	0.094	1.59529e-37	5	3.032	Methyl-CpG-binding domain-containing protein 11-like	MBD11
CSS0022217	3.86991e-42	0.88831	0.297	0.1	1.95527e-37	5	2.97	Hypothetical protein PRUPE_ppa008956mg	Unknown
CSS0046007	2.95297e-118	1.59645	0.538	0.128	1.49199e-113	6	4.203	Cytosolic class I small heat shock protein 3B, partial	HSP17.8
CSS0046912	4.42827e-98	1.66685	0.353	0.049	2.23738e-93	6	7.204	Protease Do-like 5, chloroplastic	Deg5
CSS0021952	2.73136e-78	1.18522	0.502	0.16	1.38002e-73	6	3.137	Hsp70 nucleotide exchange factor FES1	FES1
CSS0024089	9.01759e-73	1.41086	0.423	0.118	4.55614e-68	6	3.585	Ubiquitin carboxyl-terminal hydrolase 17	UBP17
CSS0025789	2.08991e-72	1.35896	0.282	0.045	1.05592e-67	6	6.267	AT-hook motif nuclear-localized protein 1	AHL9
CSS0034421	2.35615e-68	1.23915	0.456	0.126	1.19044e-63	6	3.619	Small heat shock protein 17.3	HSP17.3
CSS0011340	2.90321e-57	1.3847	0.286	0.058	1.46685e-52	6	4.931	--	Unknown
CSS0017555	2.97979e-54	0.923712	0.268	0.047	1.50554e-49	6	5.702	Ferretin 1 isoform 1	FER1
CSS0036209	2.38977e-41	0.969489	0.264	0.064	1.20743e-36	6	4.125	Small heat shock protein 21	HSP21
CSS0016833	4.1974e-33	0.630808	0.304	0.098	2.12074e-28	6	3.102	Ethylene-responsive transcription factor RAP2-4 like	ERF59
CSS0001267	0	4.34248	0.803	0.065	0	7	12.354	--	Unknown
CSS0016108	0	3.84764	0.81	0.022	0	7	36.818	Phloem protein 2-like	PP2
CSS0018961	1.86136e-215	2.85308	0.736	0.056	9.40453e-211	7	13.143	Conserved hypothetical protein	CYSTM12
CSS0031769	1.20777e-203	2.78837	0.569	0.012	6.10224e-199	7	47.417	--	Unknown
CSS0042900	7.23208e-156	2.66774	0.654	0.105	3.65401e-151	7	6.229	Metallothionin 2	MT2
CSS0011049	3.98628e-132	2.3844	0.394	0.008	2.01407e-127	7	49.25	Kirola like	MLP28
CSS0050402	9.61136e-125	2.07023	0.506	0.043	4.85614e-120	7	11.767	Uncharacterized protein LOC100265438 isoform X2	Unknown
CSS0038374	3.31486e-105	2.16408	0.357	0.025	1.67484e-100	7	14.28	Metallothionin 2	MT2A
CSS0042846	4.22966e-54	1.56351	0.401	0.085	2.13704e-49	7	4.718	Glutathione S-transferase	GST8
CSS0038948	1.18834e-45	1.15942	0.39	0.08	6.0041e-41	7	4.875	Accelerated cell death 11	ACD11
CSS0048700	1.68153e-139	1.60367	0.472	0.014	8.49591e-135	8	33.714	E3 ubiquitin-protein ligase WAV3	WAV3
CSS0005621	3.89098e-110	1.33033	0.416	0.016	1.96592e-105	8	26	GATA transcription factor 4	GATA4
CSS0041036	5.0985e-110	1.7404	0.628	0.092	2.57602e-105	8	6.826	Fructose-1,6-bisphosphatase	FBP
CSS0019002	1.58475e-93	1.45823	0.454	0.036	8.00695e-89	8	12.611	Flavanone 3-hydroxylase	F3H
CSS0004335	4.8238e-71	0.694558	0.275	0.014	2.43722e-66	8	19.643	Transmembrane ascorbate ferrireductase 1	ACYB-2
CSS0010169	8.21917e-66	1.4444	0.472	0.081	4.15274e-61	8	5.827	Glutathione S-transferase	GSTU8
CSS0034343	6.45586e-56	1.09727	0.286	0.021	3.26182e-51	8	13.619	Uclacyanin 1	UCC1
CSS0045060	1.63371e-52	0.849899	0.275	0.024	8.25433e-48	8	11.458	Cysteine-rich transmembrane module 9	CYSTM9
CSS0024302	5.29257e-51	0.988371	0.387	0.063	2.67407e-46	8	6.143	Probable calcium-binding protein CML49	CML49
CSS0031900	1.70318e-34	0.706387	0.279	0.047	8.60533e-30	8	5.936	Hypothetical protein POPTR_0002s02120g	Unknown

## Sheet: PlantscRNAdb annotation
Gene ID	Symbol	Cell cluster	Homologous gene	PlantscRNAdb (http://ibi.zju.edu.cn/plantscrnadb/ref.php)
CSS0032777	MAPA1	1	AT1G24020	Yes	xylem
CSS0035147	USP	1	AT3G62550	NO	-
CSS0004539	Unknown	1	AT1G78210	Yes	atrichoblast, columella, endodermis, epidermis, lateral root cap, phloem companion, stele
CSS0029741	Unknown	1	AT2G15960	Yes	atrichoblast, cortex, endodermis, pericycle, phloem, photosynthetic cell, trichoblast
CSS0044578	Unknown	1	AT1G19530	Yes	columella,pericycle,phloem, ppp, xylem
CSS0049187	MPSR1	1	AT1G26800	Yes	ppp, procambium, vascular initial cell
CSS0025407	PGIP1	1	AT5G06860	Yes	atrichoblast, cambium, columella, cortex, epidermis, lateral root cap, non-hair cell, procambium, stele
CSS0022866	PSAH2	1	AT1G52230	Yes	phloem, photosynthetic cell
CSS0028933	PR4	1	AT3G04720	Yes	atrichoblast, columella, cortex, lateral root cap, procambium, root cap, stele, trichoblast
CSS0014004	WAT1	1	AT1G75500	Yes	cortex, dividing cell, dividing cell , explant vasculature and callus founder cell, lateral root, meristem, metaxylem, pericycle, phloem, phloem companion cell, phloem pole pericycle, procambium, protoxylem, protoxylem-like mixed, proximal meristem, stele, vasculature, xylem
CSS0011466	PER15	2	AT5G06720	NO	-
CSS0029813	CML45	2	AT5G39670	Yes	endodermal with casparian strip, endodermis, initials, pericycle, phloem, phloem companion, phloem pole pericycle, ppp, procambium
CSS0013370	LAC7	2	AT3G09220	Yes	atrichoblast, mature root, procambium, xylem
CSS0030098	PME41	2	AT4G02330	Yes	endodermis, epidermis
CSS0013223	EP3	2	AT3G54420	Yes	endodermis, lateral root cap, procambium
CSS0027985	ABC transporter	2	AT3G47780	Yes	lateral root cap, trichoblast, vascular initial cell, xylem
CSS0020384	RHD7	2	AT3G03050	Yes	atrichoblast, hair cell, phloem, trichoblast, vascular initial cell
CSS0007581	Unknown	2	AT3G54040	Yes	companion cell, cortex, mature root, phloem, procambium, protophloem, protophloem sieve element, protophloem sieve elements, protoxylem, trichoblast, xylem, xylem pole pericycle, protoxylem-like primary vnd7
CSS0047380	CYP87A3	2	AT1G12740	Yes	atrichoblast, columella, epidermis, lateral root cap, root cap, stele, trichoblast, xylem
CSS0002951	PPO	2	AT5G06970	Yes	atrichoblast, cortex
CSS0035324	UBQ10	3	AT4G05320	Yes	atrichoblast,columella,companion cell, cortex, endodermis, lateral root cap, pericycle, phloem, phloem companion, photosynthetic cell, ppp, procambium, protophloem sieve element, protoxylem, protoxylem-like primary vnd7, richoblast, stele, trichoblast, xylem
CSS0045258	B2-1	3	AT5G42050	Yes	atrichoblast, cambium, columella, cortex, endodermal with casparian strip, endodermis, lateral root cap, maturation_protoxylem, non-hair cell, phloem, phloem, pericycle, phloem companion, ppp, procambium, protophloem sieve element, protoxylem, stele, xylem
CSS0000733	ERF2	3	AT5G47220	Yes	columella, endodermis, pericycle, ppp, procambium, quiescent center
CSS0018263	R3H	3	AT3G56680	Yes	atrichoblast, dividing cell, epidermis, meristem, pericycle, photosynthetic cell, xylem
CSS0040758	EXLB1	3	AT4G17030	Yes	endodermis, maturation_xylem pole pericycle, pericycle, quiescent center, stele, xylem pole pericycle
CSS0034421	HSP17.2	3	AT2G29500	Yes	columella, cortex, endodermis, lateral root cap, ppp, procambium, stele, vascular initial cell
CSS0018893	RTL1	3	-	-	-
CSS0028699	DESI1	3	AT3G07090	Yes	atrichoblast, columella, cortex, endodermis, epidermis, lateral root cap, ppp, procambium, protophloem sieve element, stele, trichoblast, vascular initial cell, xylem
CSS0042387	KARI	3	AT3G58610	Yes	atrichoblast, cell near scn/lri, columella, cortex, dividing cell, endodermis, epidermis, lateral root, lateral root cap, meristem, phloem pole pericycle, photosynthetic cell, protoxylem, protoxylem-like primary vnd7, proximal meristem, quiescent center, xylem pole pericycle
CSS0037885	PDLP6	3	AT2G01660	Yes	explant vasculature and callus founder cell, phloem, phloem pole pericycle, procambium, quiescent center, stele, vasculature
CSS0019367	GolS2	4	AT2G47180	Yes	endodermis, phloem / pericycle, procambium, protoxylem, vascular initial cell
CSS0048516	GRX-C9	4	AT1G28480	Yes	atrichoblast, columella, endodermis, hair cell, lateral root cap, non-hair cell, pericycle, phloem, ppp, procambium, stele, trichoblast, vascular initial cell
CSS0015685	YJU2	4	AT1G17130	Yes	lateral root cap, meristem
CSS0030699	SAUR32	4	AT2G46690	Yes	endodermis, explant vasculature and callus founder cell, phloem, phloem pole pericycle, ppp, procambium, quiescent center, stele, vasculature, xylem
CSS0028487	GH3.6	4	AT5G54510	Yes	columella, lateral root cap, phloem, phloem pole pericycle, ppp, procambium, quiescent center, trichoblast
CSS0043882	PP2C-25	4	AT2G30020	Yes	atrichoblast, columella, cortex, dividing cell, endodermis, lateral root cap, pericycle, ppp, procambium
CSS0049167	CABP	4	AT5G54490	Yes	cortex, endodermis, hair cell, lateral root cap, phloem, ppp, procambium, quiescent center, trichoblast, vascular initial cell
CSS0026515	Unknown	4	AT5G58530	Yes	atrichoblast, epidermis, meristem
CSS0024991	Unknown	4	AT5G04250	Yes	columella, endodermis, lateral root cap, trichoblast, vascular initial cell, xylem
CSS0040176	ANT	4	AT4G32400	Yes	elongation_xylem pole pericycle, pericycle, phloem pole pericycle, vasculature, xylem pole pericycle
CSS0022667	CDI	5	AT1G64980	Yes	atrichoblast, cortex, endodermis, xylem
CSS0037698	SDRd	5	AT3G55290	Yes	maturation_cortex
CSS0012697	TIM17-2	5	AT2G37410	Yes	atrichoblast, cell near scn/lri, columella, cortex, dividing cell, epidermis, lateral root cap, meristem, meristem xylem, phloem companion, photosynthetic cell, proximal meristem, protoxylem-like primary vnd7
CSS0009759	CIPK11	5	AT2G30360	Yes	atrichoblast, cortex, endodermis, hair cell, initials, pericycle, phloem, procambium, protoxylem-like mixed, stele, trichoblast, vasculature
CSS0003506	B2-2	5	AT5G42050	Yes	atrichoblast, cambium, columella, cortex, endodermal with casparian strip, endodermis, lateral root cap, maturation_protoxylem, non-hair cell, phloem, phloem / pericycle, phloem companion, ppp, procambium, protophloem sieve element, protoxylem, stele, xylem
CSS0030452	ABC transporter	5	AT5G44110	Yes	atrichoblast, cortex, endodermis, non-hair cell, procambium, trichoblast, xylem
CSS0044222	PRF5	5	AT2G19770	NO	-
CSS0033421	WRKY30	5	AT5G24110	Yes	atrichoblast, xylem
CSS0049938	MBD11	5	AT1G15340	Yes	columella, dividing cell, endodermis, meristem, ppp, procambium, protophloem sieve element
CSS0022217	Unknown	5	AT1G52360	Yes	atrichoblast, epidermis, meristem, protoxylem, trichoblast, xylem
CSS0046007	HSP17.8	6	AT1G59860	Yes	columella, epidermis, ppp, procambium, vascular initial cell, xylem
CSS0046912	Deg5	6	AT4G18370	NO	-
CSS0021952	FES1	6	AT3G09350	Yes	atrichoblast, columella, cortex, endodermis, lateral root cap, pericycle, phloem companion, photosynthetic cell, ppp, procambium, protophloem sieve element, quiescent center, stele
CSS0024089	UBP17	6	AT5G65450	NO	-
CSS0025789	AHL9	6	AT4G12080	Yes	atrichoblast, columella, companion cell, endodermis, maturation_procambium, metaphloem & companion cell, pericycle, phloem, phloem companion, procambium, protophloem sieve element, stele, vascular initial cell, vasculature, xylem
CSS0034421	HSP17.3	6	AT1G07400	Yes	atrichoblast, columella, cortex, endodermis, metaphloem & companion cell, phloem, phloem companion, ppp, procambium, protophloem, protophloem sieve element, stele
CSS0011340	Unknown	6	AT4G31160	Yes	lateral root cap
CSS0017555	FER1	6	AT5G01600	Yes	columella, cortex, endodermal with casparian strip, endodermis, meristem, meristem xylem, phloem, phloem companion, photosynthetic cell, protophloem sieve element, stele, xylem
CSS0036209	HSP21	6	AT4G27670	NO	-
CSS0016833	ERF59	6	AT1G78080	Yes	atrichoblast, columella, cortex, endodermis, epidermis, lateral root cap, pericycle, ppp, procambium, protoxylem-like primary vnd7, stele
CSS0001267	Unknown	7	-	-	-
CSS0016108	PP2	7	AT1G31200	Yes	phloem, protophloem
CSS0018961	CYSTM12	7	AT5G04080	Yes	companion cell,elongation_metaphloem & companion cell,lateral root, metaphloem & companion cell, phloem, phloem companion,phloem companion cell, phloem pole pericycle, protophloem, protophloem sieve element, protophloem sieve elements, stele
CSS0031769	Unknown	7	-	-	-
CSS0042900	MT2	7	AT3G09390	Yes	atrichoblast, columella, cortex, endodermis, epidermis, meristem, phloem, photosynthetic cell, procambium
CSS0011049	MLP28	7	AT1G70830	NO	-
CSS0050402	Unknown	7	AT5G02340	NO	-
CSS0038374	MT2A	7	AT3G09390	Yes	atrichoblast, columella, cortex, endodermis, epidermis, meristem, phloem, photosynthetic cell, procambium
CSS0042846	GST8	7	AT1G78380	Yes	atrichoblast, columella, cortex, endodermis, initials, lateral root cap, non-hair cell, phloem, protophloem sieve element, protoxylem-like primary vnd7, stele, trichoblast
CSS0038948	ACD11	7	AT2G34690	Yes	atrichoblast,companion cell,epidermis, meristem, metaphloem & companion cell, pericycle, phloem, phloem companion, phloem companion cell
CSS0048700	WAV3	8	AT5G60710	Yes	columella, lateral root cap
CSS0005621	GATA4	8	AT2G45050	Yes	atrichoblast, columella, cortex, dividing cell, lateral root cap, meristem, meristem_atrichoblast, pericycle
CSS0041036	FBP	8	AT1G43670	Yes	pericycle, protophloem sieve element, trichoblast
CSS0019002	F3H	8	AT3G51240	Yes	cortex, endodermis, pericycle, phloem pole pericycle, ppp, xylem pole pericycle
CSS0004335	ACYB-2	8	AT4G25570	Yes	atrichoblast, cortex, endodermal with casparian strip, endodermis, explant vasculature and callus founder cell, hair cell, maturation_endodermis, meristem, richoblast, transit amplifying cell, trichoblast
CSS0010169	GSTU8	8	AT3G09270	Yes	atrichoblast, columella, companion cell, cortex, endodermal with casparian strip, endodermis explant vasculature and callus founder cell, lateral root cap, phloem, procambium, trichoblast, xylem, protoxylem-like primary vnd7
CSS0034343	UCC1	8	AT2G32300	Yes	cortex, endodermal with casparian strip, endodermis
CSS0045060	CYSTM9	8	AT3G22240	Yes	atrichoblast, cortex, endodermal with casparian strip, endodermis, phloem / pericycle, procambium, protoxylem-like primary myb168, xylem
CSS0024302	CML49	8	AT3G10300	Yes	atrichoblast, cortex, endodermis, epidermis, lateral root cap, non-hair cell, ppp, quiescent center, stele, trichoblast
CSS0031900	Unknown	8	AT1G20070	Yes	atrichoblast, cambium, columella, hair cell, lateral root cap, metaxylem, pericycle, phloem, phloem pole pericycle, protophloem sieve element, stele, trichoblast

## Sheet: Cell cluster expression
		Expression									Cell expressed
Cell cluster	Gene ID	Cluster 1	Cluster 2	Cluster 3	Cluster 4	Cluster 5	Cluster 6	Cluster 7	Cluster 8		Cluster 1	Cluster 2	Cluster 3	Cluster 4	Cluster 5	Cluster 6	Cluster 7	Cluster 8
1	CSS0032777	1.78311	0.55424	1.09616	0.446619	0.558258	0.611784	0.69832	0.510715		58.3028	20.8696	44.69	22.0652	23.5501	27.621	29.368	25.2788
1	CSS0035147	1.67221	0.47674	0.900739	0.49782	0.336174	0.962985	0.367214	0.5381		56.7766	17.7391	40.0246	23.909	14.2355	40.5242	17.4721	27.881
1	CSS0004539	1.57743	0.449436	1.05112	0.578877	0.232719	0.687264	0.996141	0.516677		54.6703	16.9565	43.585	26.1217	10.3691	29.8387	39.4052	26.3941
1	CSS0029741	1.45874	0.402571	1.05225	0.435132	0.247552	0.575626	0.902003	0.55166		49.8474	15.2609	42.7256	20.8359	11.0721	25.2016	34.9442	26.3941
1	CSS0044578	0.973409	0.221417	0.684247	0.293842	0.11286	0.134864	0.44615	0.148697		35.2564	8.56522	31.4303	14.874	4.92091	6.65323	19.3309	8.55019
1	CSS0049187	0.911644	0.238642	0.600488	0.355239	0.0862226	0.523479	0.655353	0.491337		34.5849	9.34783	29.0976	18.193	4.21793	26.2097	29.7398	24.5353
1	CSS0025407	0.672423	0.162393	0.265788	0.227027	0.135153	0.148878	0.117262	0.17693		26.0989	6.3913	14.1805	11.8623	6.15114	7.8629	5.20446	10.4089
1	CSS0022866	0.791113	0.182005	0.574607	0.350054	0.169637	0.417399	0.205532	0.196142		30.2198	7.21739	28.5451	18.1315	8.26011	21.1694	10.7807	11.8959
1	CSS0028933	1.01665	0.234604	0.812176	0.314111	0.144436	0.706224	0.155397	1.0025		35.2564	8.82609	34.9294	14.9969	5.9754	30.2419	7.43494	46.0967
1	CSS0014004	1.00758	0.241321	0.887013	0.276877	0.270467	0.989504	0.314056	0.0474311		34.4017	9.43478	35.5433	13.3989	11.9508	38.9113	13.7546	2.97398
2	CSS0011466	0.880334	1.85171	0.615614	1.01992	1.27541	0.836044	0.933792	1.06157		32.8449	58.6957	29.4045	44.9293	47.6274	37.5	40.8922	49.8141
2	CSS0029813	0.675442	1.67885	0.670394	1.21428	1.01979	0.674683	0.850865	0.877767		25.4579	53.0435	30.8778	50.461	40.246	31.8548	37.5465	40.1487
2	CSS0013370	0.43782	1.16312	0.41835	0.618861	0.72594	0.393243	0.383532	0.702252		16.8498	38.913	20.0737	29.0719	29.7012	18.5484	18.2156	36.0595
2	CSS0030098	0.459539	1.18406	0.38178	0.532089	0.694755	0.428826	0.384117	0.646084		17.7656	39	18.232	24.0934	26.7135	19.5565	17.1004	31.5985
2	CSS0013223	0.788877	1.48296	0.547462	0.77832	1.16668	0.55001	0.671669	1.31137		29.304	49.8261	26.5807	34.9723	44.2882	24.5968	29.7398	54.2751
2	CSS0027985	0.196484	0.729572	0.269244	0.483283	0.429384	0.334192	0.326541	0.510126		7.69231	27.0435	13.9349	26.2446	18.4534	16.9355	16.3569	29.368
2	CSS0020384	0.218762	0.736565	0.231646	0.587085	0.496611	0.38022	0.366966	0.446804		8.66911	27.0435	12.0319	30.4241	22.1441	19.1532	21.1896	23.4201
2	CSS0007581	0.59103	1.22932	0.433639	0.719201	1.05958	0.619442	0.4915	0.774229		22.619	42.2609	20.6875	31.4075	40.949	27.8226	22.6766	31.9703
2	CSS0047380	0.235176	0.691777	0.230535	0.279062	0.410223	0.202176	0.231563	0.452691		9.31013	25.2174	11.6022	14.874	17.3989	9.47581	12.2677	23.7918
2	CSS0002951	0.492248	0.9396	0.35029	0.563961	0.707355	0.327022	0.346318	1.13176		19.1697	33.6957	17.3726	26.8593	28.2953	15.3226	15.9851	48.3271
3	CSS0035324	0.134577	0.143111	1.13776	0.0669764	0.0944598	0.0411828	0.342724	0.0545924		5.34188	5.34783	44.3831	4.11801	4.04218	2.01613	13.0112	2.60223
3	CSS0045258	0.0475262	0.0979797	0.834199	0.0339083	0.136839	0.0376126	0.171816	0.0237248		1.9536	3.82609	38.3671	1.96681	5.27241	2.01613	9.29368	1.11524
3	CSS0000733	0.0940904	0.0513026	0.611357	0.0154249	0.0176766	0.0615968	0.158829	0.0249726		3.81563	2.04348	29.4045	0.860479	0.702988	3.22581	6.69145	1.48699
3	CSS0018263	0.158765	0.0663827	0.621449	0.0319488	0.0792239	0.0516422	0.14723	0.0585157		6.41026	2.6087	31.86	1.84388	3.33919	2.62097	7.80669	4.08922
3	CSS0040758	0.292265	0.0729695	0.762228	0.0236469	0.0291919	0.0448727	0	0.025392		10.0733	2.82609	30.6937	1.22926	1.23023	2.21774	0	1.48699
3	CSS0034421	0.194295	0.175174	1.03104	0.0862514	0.132102	1.24296	0.226952	0.713192		7.57021	6.78261	39.4721	4.48679	5.79965	45.5645	9.66543	28.2528
3	CSS0018893	0.153887	0.0519383	0.529017	0.0143052	0.0168043	0.134277	0.217738	0.268015		6.41026	2.17391	26.949	0.799017	0.878735	7.25806	11.1524	16.7286
3	CSS0028699	0.0519684	0.0815252	0.507679	0.062444	0.0779673	0.339052	0.128023	0.44162		2.3199	3.26087	25.6599	3.62631	3.69069	18.3468	7.43494	24.9071
3	CSS0042387	0.178726	0.084787	0.52504	0.146215	0.150569	0.0163558	0.146858	0.0840147		7.60073	3.30435	27.1946	8.66626	7.55712	1.00806	8.17844	4.83271
3	CSS0037885	0.224725	0.0844642	0.535225	0.0977176	0.0756936	0.312538	0.0518373	0.0560769		9.18803	3.43478	25.4758	5.34726	3.51494	15.5242	2.97398	3.34572
4	CSS0019367	0.117185	0.294232	0.423903	1.08237	0.305181	0.719983	0.496771	0.366554		4.91453	11.5217	22.345	49.4776	13.884	33.871	23.7918	21.9331
4	CSS0048516	0.12443	0.229908	0.400453	0.879212	0.353714	0.179506	0.631457	0.155511		5.12821	9.17391	20.1351	42.4708	15.8172	9.27419	30.1115	8.55019
4	CSS0015685	0.168387	0.215805	0.0935546	0.608295	0.319679	0.130531	0.329504	0.189668		7.17338	8.69565	5.52486	32.6982	14.9385	6.45161	17.8439	11.5242
4	CSS0030699	0.100732	0.266294	0.221824	0.714932	0.156269	0.304699	0.499407	0.438227		4.12088	10.5652	11.1725	35.0953	7.02988	15.121	24.5353	23.7918
4	CSS0028487	0.0805738	0.24914	0.19276	0.648906	0.278892	0.183249	0.148923	0.115971		3.23565	9.78261	10.2517	31.9607	12.3023	10.6855	8.92193	6.69145
4	CSS0043882	0.0741736	0.182147	0.24005	0.603504	0.181524	0.288478	0.269037	0.347221		3.11355	7.47826	12.9527	31.7763	8.78735	15.5242	15.6134	22.3048
4	CSS0049167	0.106897	0.203634	0.172347	0.746772	0.318125	0.459822	0.50977	0.703145		4.57875	8.08696	9.08533	34.4192	13.5325	21.9758	21.5613	33.829
4	CSS0026515	0.0510417	0.139361	0.185779	0.49324	0.331064	0.209581	0.390637	0.205733		2.16728	5.78261	10.2517	27.0436	15.4657	11.8952	20.8178	13.7546
4	CSS0024991	0.0541582	0.206763	0.214063	0.484571	0.135859	0.198231	0.243339	0.162942		2.28938	8.21739	11.6022	25.9373	6.32689	10.8871	14.1264	10.7807
4	CSS0040176	0.0613152	0.188042	0.148727	0.566954	0.302761	0.251509	0.310787	0.265076		2.5641	7.34783	7.91897	27.4124	14.2355	13.3065	16.3569	14.4981
5	CSS0022667	0.221578	0.539671	0.303222	0.620129	1.47231	0.382229	0.433417	0.554352		8.94383	20.5652	14.6716	29.1334	55.7118	17.9435	20.4461	28.2528
5	CSS0037698	0.149398	0.267874	0.167929	0.41325	1.0441	0.118864	0.208814	0.164281		6.19658	10.4783	8.90117	21.8808	41.652	6.25	11.1524	9.66543
5	CSS0012697	0.102686	0.227297	0.113364	0.352211	0.891557	0.101643	0.253916	0.146903		4.24298	9.13043	6.26151	19.791	37.7856	5.24194	14.1264	10.0372
5	CSS0009759	0.140931	0.316712	0.318768	0.663203	1.15025	0.412573	0.16121	0.128652		5.89133	12.3043	15.531	31.5304	44.9912	19.3548	8.17844	7.43494
5	CSS0003506	0.0829456	0.21238	0.185294	0.427312	0.855317	0.247214	0.343511	0.100149		3.35775	8.3913	9.94475	21.8193	34.6221	11.8952	17.4721	5.94796
5	CSS0030452	0.163671	0.354814	0.217713	0.526987	1.023	0.238452	0.262094	0.322087		6.53236	13.913	11.418	26.2446	40.7733	12.2984	13.3829	18.9591
5	CSS0044222	0.134978	0.217904	0.158592	0.344872	0.852442	0.287138	0.485717	0.301968		5.64713	8.73913	8.47145	18.8076	36.0281	15.121	24.1636	17.1004
5	CSS0033421	0.088711	0.264254	0.0863318	0.240433	0.656261	0.06621	0.185846	0.0740724		3.60195	10	4.60405	12.7843	27.5923	3.42742	9.29368	4.46097
5	CSS0049938	0.11168	0.17042	0.17103	0.344656	0.662141	0.241482	0.345172	0.264857		4.54823	6.86957	9.33088	19.2993	28.471	12.9032	18.5874	16.3569
5	CSS0022217	0.115014	0.244468	0.1833	0.433209	0.718601	0.131053	0.2221	0.135514		4.60928	9.69565	9.76059	22.9871	29.7012	6.45161	11.1524	7.80669
6	CSS0046007	0.216448	0.2329	0.54351	0.254805	0.131438	1.5076	0.338772	1.24443		8.60806	9.04348	23.45	12.1082	5.9754	53.8306	14.4981	49.8141
6	CSS0046912	0.0881706	0.137451	0.0523504	0.142375	0.0337006	0.919758	0.0795587	0.602595		3.69353	5.3913	2.70104	7.12969	1.58172	35.2823	3.34572	25.2788
6	CSS0021952	0.191188	0.3451	0.460499	0.474577	0.269051	1.22552	0.320968	0.939292		8.18071	13.1304	23.6955	24.7695	12.6538	50.2016	16.7286	43.4944
6	CSS0024089	0.156659	0.276201	0.638148	0.272816	0.124856	1.20072	0.137345	0.593958		6.16606	10.4348	25.046	12.477	5.79965	42.3387	7.0632	26.3941
6	CSS0025789	0.0381754	0.0838353	0.177219	0.133201	0.0107351	0.71889	0.0223479	0.474637		1.64835	3.30435	8.77839	6.82237	0.702988	28.2258	0.743494	20.8178
6	CSS0034421	0.194295	0.175174	1.03104	0.0862514	0.132102	1.24296	0.226952	0.713192		7.57021	6.78261	39.4721	4.48679	5.79965	45.5645	9.66543	28.2528
6	CSS0011340	0.0821359	0.0978394	0.383955	0.0987763	0.0430228	0.788408	0.045204	0.383575		3.1746	3.56522	15.5924	4.85556	1.75747	28.629	1.85874	17.4721
6	CSS0017555	0.0447355	0.0946733	0.287797	0.0243017	0.106584	0.582323	0.0553574	0.105099		1.9536	3.78261	14.6716	1.35218	4.56942	26.8145	2.60223	7.0632
6	CSS0036209	0.0899235	0.0874242	0.393677	0.0990124	0.0189553	0.627182	0.161746	0.236917		3.84615	3.43478	17.8637	4.91703	0.878735	26.4113	7.0632	13.0112
6	CSS0016833	0.115066	0.174163	0.349901	0.276325	0.0946786	0.619838	0.310232	0.389133		4.70085	6.86957	18.3548	14.1364	4.56942	30.4435	15.9851	23.4201
7	CSS0001267	0.173616	0.218967	0.0830286	0.126121	0.219097	0.12487	3.39916	0.0864917		6.31868	8.08696	4.41989	6.4536	8.26011	5.64516	80.2974	5.20446
7	CSS0016108	0.061983	0.0704532	0.0427545	0.027999	0.0811323	0.0292342	3.03271	0.0345933		2.3199	2.69565	2.02578	1.53657	3.16344	1.41129	81.0409	1.85874
7	CSS0018961	0.145409	0.130735	0.115829	0.108179	0.252075	0.146807	2.41645	0.029659		5.31136	5.08696	5.46347	5.40873	10.1933	7.05645	73.6059	1.85874
7	CSS0031769	0.0307372	0.0289778	0.020131	0.0134617	0.0269606	0.0537635	1.68962	0.00888377		1.19048	1.17391	1.10497	0.737554	1.40598	2.41935	56.8773	0.743494
7	CSS0042900	0.326396	0.173902	0.173569	0.245148	0.381402	0.399644	2.14767	0.0597713		11.6911	6.56522	8.65562	12.7843	16.1687	17.5403	65.4275	3.34572
7	CSS0011049	0.0252012	0.0209686	0.0081676	0.0124018	0.0291158	0.00954145	1.16388	0.00838245		0.946276	0.782609	0.429711	0.614628	1.23023	0.604839	39.4052	0.743494
7	CSS0050402	0.13691	0.0494293	0.133995	0.0749981	0.0392784	0.0755856	1.37688	0.0319318		5.67766	2	6.69122	3.99508	1.93322	3.83065	50.5576	1.85874
7	CSS0038374	0.0377072	0.0380043	0.0498394	0.0963864	0.0380891	0.0655372	1.015	0.0209175		1.5873	1.56522	2.76243	5.2858	1.58172	3.62903	35.6877	1.48699
7	CSS0042846	0.129975	0.166583	0.262795	0.23605	0.149116	0.179495	1.01849	0.232403		5.37241	6.47826	13.1369	12.477	6.50264	9.47581	40.1487	13.7546
7	CSS0038948	0.154251	0.0765649	0.266838	0.134428	0.0965178	0.110451	0.870574	0.77324		6.56288	3.26087	13.5666	7.68285	4.56942	6.25	39.0335	43.1227
8	CSS0048700	0.031474	0.0532801	0.0204957	0.019009	0.0307268	0.0175752	0.0207487	1.03157		1.31258	2.04348	1.04359	1.04487	1.23023	0.806452	1.11524	47.2119
8	CSS0005621	0.0277783	0.0239594	0.047159	0.0255923	0.0137957	0.0796818	0.0476469	0.838872		1.221	0.913043	2.57827	1.47511	0.702988	4.23387	2.97398	41.6357
8	CSS0041036	0.235595	0.172115	0.233549	0.140202	0.140553	0.274761	0.335149	1.54573		9.58486	6.86957	11.7864	7.99017	6.50264	13.1048	15.9851	62.8253
8	CSS0019002	0.0700393	0.0757292	0.0702088	0.0810675	0.077281	0.115847	0.0478403	0.95021		2.86935	3.08696	3.8674	4.85556	3.69069	6.25	2.60223	45.3532
8	CSS0004335	0.0410531	0.0177324	0.0289085	0.0242799	0.0132039	0.0215977	0.0198029	0.438386		1.80098	0.782609	1.71885	1.47511	0.702988	1.20968	1.11524	27.5093
8	CSS0010169	0.142656	0.268578	0.134456	0.175406	0.354544	0.216935	0.17398	1.15837		5.70818	10.1739	6.44567	8.72772	13.884	10.4839	8.17844	47.2119
8	CSS0034343	0.0293855	0.0731026	0.0361476	0.0645526	0.0423932	0.039419	0.00929841	0.607507		1.15995	2.86957	1.78023	3.62631	2.10896	2.21774	0.743494	28.6245
8	CSS0045060	0.0348922	0.0827832	0.0203455	0.027993	0.0677772	0.209288	0.0665082	0.52511		1.49573	3.26087	1.04359	1.53657	3.16344	10.6855	3.34572	27.5093
8	CSS0024302	0.0782139	0.189941	0.148526	0.0759352	0.20208	0.456134	0.133739	0.802309		3.11355	7.34783	7.73481	4.11801	8.6116	22.379	5.57621	38.6617
8	CSS0031900	0.0702134	0.104352	0.0570839	0.157038	0.226469	0.092023	0.0629538	0.532446		2.77778	4.34783	3.19214	8.97357	9.84183	5.04032	4.08922	27.881
