# Supplementary material for: Root-specific theanine metabolism and regulation at the single-cell level in tea plants (Camellia sinensis)
Source: eLife. 2024 Oct 14;13:RP95891. doi: 10.7554/eLife.95891 (PMC11473105; doi:10.7554/eLife.95891)
Supplement: Supplementary file 4. [file elife-95891-supp4.xlsx]

## Sheet: Module gene
Gene ID	Module	vst.variance.standardized	p_val	p_val_adj	Description	TFs_Family	GO ID	GO_term	Pathway	Pathway_description
CSS0045568	2	0.882395	1.18407e-09	2.64946e-08	PREDICTED: V-type proton ATPase subunit H	--	GO:0000221,GO:0000325,GO:0005773,GO:0005774,GO:0005794,GO:0005886,GO:0009507,GO:0015991,GO:0046961	vacuolar proton-transporting V-type ATPase, V1 domain|plant-type vacuole|vacuole|vacuolar membrane|Golgi apparatus|plasma membrane|chloroplast|ATP hydrolysis coupled proton transport|proton-transporting ATPase activity, rotational mechanism	ko00190,ko04145	Oxidative phosphorylation|Phagosome
CSS0048270	2	0.906542	3.93017e-12	1.06245e-10	ER membrane protein complex subunit 10 like	--	--	--	--	--
CSS0014681	1	0.923411	6.25542e-16	2.16032e-14	Aspartic proteinase-like protein	--	GO:0004190,GO:0005886,GO:0006508,GO:0030163,GO:0031225,GO:0046658	aspartic-type endopeptidase activity|plasma membrane|proteolysis|protein catabolic process|anchored component of membrane|anchored component of plasma membrane	--	--
CSS0049315	2	0.859566	6.53507e-18	2.50329e-16	Nascent polypeptide-associated complex subunit beta like	--	GO:0009651	response to salt stress	--	--
CSS0050291	2	1.72348	2.887e-12	7.91318e-11	photosystem I reaction center subunit iv b, partial (chloroplast)	--	GO:0009535,GO:0009538,GO:0015979	chloroplast thylakoid membrane|photosystem I reaction center|photosynthesis	ko00195	Photosynthesis
CSS0042630	2	0.846484	0.000165654	0.00196933	Protein PHR1-LIKE like	GARP-G2-like	GO:0003677,GO:0003700,GO:0005634,GO:0006355	DNA binding|DNA-binding transcription factor activity|nucleus|regulation of transcription, DNA-templated	--	--
CSS0035132	2	0.884961	3.32189e-10	7.79195e-09	Tubulin-folding cofactor B like	--	GO:0005634,GO:0005737,GO:0005829,GO:0009524,GO:0009793,GO:0051301	nucleus|cytoplasm|cytosol|phragmoplast|embryo development ending in seed dormancy|cell division	--	--
CSS0033981	2	1.14209	6.71376e-06	9.98566e-05	--	--	--	--	--	--
CSS0026576	2	1.11395	5.79994e-05	0.000748511	Ankyrin repeat-containing protein	--	--	--	--	--
CSS0018771	1	1.00637	7.50449e-09	1.55906e-07	Pre-mRNA-splicing factor like	--	--	--	--	--
CSS0035441	2	0.980237	0.000822382	0.00853025	Mitochondrial acidic protein	--	--	--	--	--
CSS0015153	2	0.537528	2.53463e-06	3.98204e-05	dnaJ protein homolog	--	GO:0005524,GO:0005886,GO:0006457,GO:0009408,GO:0031072,GO:0046872,GO:0051082	ATP binding|plasma membrane|protein folding|response to heat|heat shock protein binding|metal ion binding|unfolded protein binding	--	--
CSS0044679	2	0.935914	0.000483402	0.00529687	AMMECR1 protein	--	GO:0005829,GO:0009651	cytosol|response to salt stress	--	--
CSS0050402	2	2.76384	9.81239e-13	2.77899e-11	G surface protein, allelic form 156 like	--	--	--	--	--
CSS0009909	2	1.38796	8.88807e-06	0.000129527	Protein trichome birefringence-like	--	GO:0005794,GO:0016021,GO:0016413	Golgi apparatus|integral component of membrane|O-acetyltransferase activity	--	--
CSS0009164	1	1.03895	0.000375003	0.00419461	diphosphomevalonate decarboxylase MVD	--	GO:0004163,GO:0005524,GO:0005777,GO:0005829,GO:0016126,GO:0019287	diphosphomevalonate decarboxylase activity|ATP binding|peroxisome|cytosol|sterol biosynthetic process|isopentenyl diphosphate biosynthetic process, mevalonate pathway	ko00900	Terpenoid backbone biosynthesis
CSS0033098	1	0.88358	2.51759e-05	0.000343508	suppressor of gene silencing like protein	--	--	--	--	--
CSS0019095	2	1.26633	4.27184e-06	6.50497e-05	UDP-glycosyltransferase 94P1	--	GO:0016758	transferase activity, transferring hexosyl groups	--	--
CSS0047502	1	1.00262	3.04309e-11	7.69145e-10	Transcriptional activator DEMETER like	--	GO:0003677,GO:0003906,GO:0005634,GO:0006284,GO:0006306,GO:0006349,GO:0009793,GO:0019104,GO:0043078,GO:0046872,GO:0051539	DNA binding|DNA-(apurinic or apyrimidinic site) endonuclease activity|nucleus|base-excision repair|DNA methylation|regulation of gene expression by genetic imprinting|embryo development ending in seed dormancy|DNA N-glycosylase activity|polar nucleus|metal ion binding|4 iron, 4 sulfur cluster binding	--	--
CSS0035481	1	0.932025	9.57314e-08	1.76077e-06	Colanic acid biosynthesis glycosyltransferase	--	--	--	--	--
CSS0035145	1	1.35968	8.43903e-15	2.72101e-13	Protein DMR6-LIKE OXYGENASE 2 like	--	GO:0002229,GO:0046244,GO:0046872,GO:0051213	defense response to oomycetes|salicylic acid catabolic process|metal ion binding|dioxygenase activity	--	--
CSS0030750	1	0.948237	8.53784e-12	2.25026e-10	unnamed protein product, partial	--	GO:0003729,GO:0005737,GO:0008380,GO:0009735,GO:0046719	mRNA binding|cytoplasm|RNA splicing|response to cytokinin|regulation by virus of viral protein levels in host cell	--	--
CSS0041539	1	0.984362	0.000439612	0.00485389	NAC domain-containing protein	NAC	GO:0003677,GO:0003700,GO:0005634,GO:0005737,GO:0009644,GO:0009962,GO:0016021,GO:0045893	DNA binding|DNA-binding transcription factor activity|nucleus|cytoplasm|response to high light intensity|regulation of flavonoid biosynthetic process|integral component of membrane|positive regulation of transcription, DNA-templated	--	--
CSS0003217	1	0.952428	0.000161437	0.00192192	hypothetical protein BC332_29410	--	--	--	--	--
CSS0001760	1	2.72395	0.00032417	0.00366577	Major facilitator	--	GO:0000741,GO:0005739,GO:0009651,GO:0010197,GO:0016021	karyogamy|mitochondrion|response to salt stress|polar nucleus fusion|integral component of membrane	--	--
CSS0044686	2	0.757574	2.00267e-30	1.31068e-28	ras-related protein RABF1	--	GO:0003924,GO:0005525,GO:0005768,GO:0005769,GO:0005783,GO:0005829,GO:0005886,GO:0006886,GO:0006897,GO:0010009,GO:0031901,GO:0032482,GO:0045022	GTPase activity|GTP binding|endosome|early endosome|endoplasmic reticulum|cytosol|plasma membrane|intracellular protein transport|endocytosis|cytoplasmic side of endosome membrane|early endosome membrane|Rab protein signal transduction|early endosome to late endosome transport	ko04144,ko04145	Endocytosis|Phagosome
CSS0024991	1	1.08568	3.4007e-29	2.09793e-27	PREDICTED: OTU domain-containing protein DDB_G0284757 isoform X1	--	--	--	--	--
CSS0010367	2	1.18688	6.12278e-07	1.03497e-05	phenylalanine ammonia-lyase	--	GO:0005737,GO:0006559,GO:0009800,GO:0045548	cytoplasm|L-phenylalanine catabolic process|cinnamic acid biosynthetic process|phenylalanine ammonia-lyase activity	ko00360,ko00940	Phenylalanine metabolism|Phenylpropanoid biosynthesis
CSS0002591	1	1.18721	8.70864e-19	3.45643e-17	Von Willebrand factor, type A protein	--	GO:0005886,GO:0009630,GO:0016567,GO:0046872,GO:0048364,GO:0061630	plasma membrane|gravitropism|protein ubiquitination|metal ion binding|root development|ubiquitin protein ligase activity	--	--
CSS0014649	2	0.731965	2.17755e-15	7.23346e-14	ubiquitin-like protein	--	GO:0000398,GO:0005634,GO:0005737,GO:0006464,GO:0031386	mRNA splicing, via spliceosome|nucleus|cytoplasm|cellular protein modification process|protein tag	--	--
CSS0037773	2	0.911527	3.49208e-09	7.48249e-08	hypothetical protein POPTR_010G222000v3	--	GO:0016471,GO:0042626,GO:1902600	vacuolar proton-transporting V-type ATPase complex|ATPase activity, coupled to transmembrane movement of substances|proton transmembrane transport	ko00190,ko04145	Oxidative phosphorylation|Phagosome
CSS0001595	1	0.968029	3.70925e-32	2.59211e-30	Patatin-like protein	--	GO:0006952,GO:0016042,GO:0016787	defense response|lipid catabolic process|hydrolase activity	--	--
CSS0009362	2	1.24349	5.8924e-06	8.83423e-05	chlorophyll a-b binding protein 6a, chloroplastic	--	GO:0009416,GO:0009522,GO:0009523,GO:0009535,GO:0009768,GO:0009941,GO:0010287,GO:0016021,GO:0016168,GO:0018298,GO:0046872	response to light stimulus|photosystem I|photosystem II|chloroplast thylakoid membrane|photosynthesis, light harvesting in photosystem I|chloroplast envelope|plastoglobule|integral component of membrane|chlorophyll binding|protein-chromophore linkage|metal ion binding	--	--
CSS0028910	1	0.913411	1.00634e-06	1.65728e-05	Nuclear receptor corepressor 1 like	MYB-related	--	--	--	--
CSS0041014	2	1.0045	0.000319939	0.0036228	Nitrilase-like protein	--	GO:0006807,GO:0009536,GO:0016787,GO:0046686	nitrogen compound metabolic process|plastid|hydrolase activity|response to cadmium ion	--	--
CSS0020776	2	0.879314	2.68051e-09	5.80758e-08	Nitrilase-like protein	--	GO:0006807,GO:0009536,GO:0016787,GO:0046686	nitrogen compound metabolic process|plastid|hydrolase activity|response to cadmium ion	--	--
CSS0046087	2	0.694871	3.93928e-35	3.06675e-33	dehydroascorbate reductase	--	GO:0004364,GO:0005829,GO:0005886,GO:0010731,GO:0043295,GO:0045174,GO:0080151	glutathione transferase activity|cytosol|plasma membrane|protein glutathionylation|glutathione binding|glutathione dehydrogenase (ascorbate) activity|positive regulation of salicylic acid mediated signaling pathway	ko00053,ko00480	Ascorbate and aldarate metabolism|Glutathione metabolism
CSS0018656	2	0.898316	3.18589e-11	8.03631e-10	metal tolerance protein 5-like	--	GO:0000139,GO:0005384,GO:0005770,GO:0005794,GO:0010042,GO:0010486,GO:0016021,GO:0030026,GO:0031902,GO:0046688	Golgi membrane|manganese ion transmembrane transporter activity|late endosome|Golgi apparatus|response to manganese ion|manganese:proton antiporter activity|integral component of membrane|cellular manganese ion homeostasis|late endosome membrane|response to copper ion	--	--
CSS0015971	1	0.85885	4.09831e-20	1.7474e-18	ABC transporter B family member 20 like	--	GO:0005524,GO:0005634,GO:0005886,GO:0005887,GO:0042626	ATP binding|nucleus|plasma membrane|integral component of plasma membrane|ATPase activity, coupled to transmembrane movement of substances	ko02010	ABC transporters
CSS0042461	2	0.736301	3.59776e-07	6.2231e-06	unnamed protein product, partial	--	GO:0003779,GO:0015629,GO:0030042	actin binding|actin cytoskeleton|actin filament depolymerization	--	--
CSS0035906	2	0.829832	1.13877e-10	2.75425e-09	zinc finger protein GIS2-like	--	--	--	--	--
CSS0024140	1	1.27847	6.73566e-06	0.000100123	receptor-like protein 12	--	GO:0005886,GO:0016021,GO:0050832	plasma membrane|integral component of membrane|defense response to fungus	--	--
CSS0025388	2	0.794716	9.30475e-20	3.88531e-18	UDP-glucuronate decarboxylase	--	GO:0005737,GO:0033320,GO:0042732,GO:0048040,GO:0070403	cytoplasm|UDP-D-xylose biosynthetic process|D-xylose metabolic process|UDP-glucuronate decarboxylase activity|NAD+ binding	ko00520	Amino sugar and nucleotide sugar metabolism
CSS0042515	1	0.969158	2.3775e-15	7.88208e-14	CASP-like protein	--	GO:0005886,GO:0016021	plasma membrane|integral component of membrane	--	--
CSS0049145	2	0.908219	1.86248e-07	3.33695e-06	PREDICTED: ubiquitin-conjugating enzyme E2 7-like	--	GO:0005524,GO:0016567,GO:0016740	ATP binding|protein ubiquitination|transferase activity	ko04120,ko04141	Ubiquitin mediated proteolysis|Protein processing in endoplasmic reticulum
CSS0018512	1	0.970385	4.47552e-05	0.000587645	hypothetical protein VITISV_043115	--	GO:0005783,GO:0005789,GO:0005886,GO:0006665,GO:0009922,GO:0009923,GO:0010025,GO:0010091,GO:0016021,GO:0016491,GO:0042335,GO:0042761,GO:0102758,GO:1905499	endoplasmic reticulum|endoplasmic reticulum membrane|plasma membrane|sphingolipid metabolic process|fatty acid elongase activity|fatty acid elongase complex|wax biosynthetic process|trichome branching|integral component of membrane|oxidoreductase activity|cuticle development|very long-chain fatty acid biosynthetic process|very-long-chain enoyl-CoA reductase activity|trichome papilla formation	ko00062,ko01040	Fatty acid elongation|Biosynthesis of unsaturated fatty acids
CSS0023400	2	1.12876	0.000896776	0.00922239	actin	--	GO:0005524,GO:0005737,GO:0005856	ATP binding|cytoplasm|cytoskeleton	--	--
CSS0037058	1	1.04539	0.000400897	0.00445857	Glucan endo-1,3-beta-glucosidase	--	GO:0005975,GO:0006952,GO:0042973	carbohydrate metabolic process|defense response|glucan endo-1,3-beta-D-glucosidase activity	--	--
CSS0020373	2	0.678351	2.03013e-87	4.86124e-85	Triosephosphate isomerase	--	GO:0004807,GO:0005737,GO:0006094,GO:0006096	triose-phosphate isomerase activity|cytoplasm|gluconeogenesis|glycolytic process	--	--
CSS0043084	2	0.801262	3.29119e-06	5.0868e-05	SC35-like splicing factor 30 isoform 1	--	GO:0000381,GO:0000398,GO:0003723,GO:0003729,GO:0005681,GO:0006979,GO:0008380,GO:0016607,GO:0042802,GO:0045292	regulation of alternative mRNA splicing, via spliceosome|mRNA splicing, via spliceosome|RNA binding|mRNA binding|spliceosomal complex|response to oxidative stress|RNA splicing|nuclear speck|identical protein binding|mRNA cis splicing, via spliceosome	--	--
CSS0045683	2	0.912711	0.00034288	0.00386352	Protein INVOLVED IN DE NOVO like	--	GO:0003723,GO:0006306,GO:0006342,GO:0010569,GO:0031047,GO:0046686	RNA binding|DNA methylation|chromatin silencing|regulation of double-strand break repair via homologous recombination|gene silencing by RNA|response to cadmium ion	--	--
CSS0010319	1	0.919312	4.97652e-08	9.45257e-07	Telomere repeat-binding protein	--	GO:0000723,GO:0000781,GO:0003677,GO:0003691,GO:0005634,GO:0042162	telomere maintenance|chromosome, telomeric region|DNA binding|double-stranded telomeric DNA binding|nucleus|telomeric DNA binding	--	--
CSS0017369	2	0.794443	2.42284e-15	8.02715e-14	peptidyl-prolyl cis-trans isomerase FKBP20-1 isoform X1	--	GO:0000413,GO:0003755,GO:0005528,GO:0005737,GO:0061077	protein peptidyl-prolyl isomerization|peptidyl-prolyl cis-trans isomerase activity|FK506 binding|cytoplasm|chaperone-mediated protein folding	--	--
CSS0007728	2	0.999447	6.78959e-06	0.000100895	CASP-like protein 5B1	--	GO:0005886,GO:0016021	plasma membrane|integral component of membrane	--	--
CSS0032256	2	1.57944	1.87984e-64	2.93145e-62	heat shock protein 17.7	--	GO:0000302,GO:0005737,GO:0006457,GO:0009408,GO:0009644,GO:0009651,GO:0010286,GO:0042542,GO:0043621,GO:0051082,GO:0051259	response to reactive oxygen species|cytoplasm|protein folding|response to heat|response to high light intensity|response to salt stress|heat acclimation|response to hydrogen peroxide|protein self-association|unfolded protein binding|protein complex oligomerization	ko04141	Protein processing in endoplasmic reticulum
CSS0030646	2	1.1303	1.0598e-05	0.000152989	HSP18.1A	--	GO:0005737	cytoplasm	ko04141	Protein processing in endoplasmic reticulum
CSS0034429	2	1.30702	3.61475e-29	2.22455e-27	heat shock protein 17.7	--	GO:0000302,GO:0005737,GO:0006457,GO:0009408,GO:0009644,GO:0009651,GO:0010286,GO:0042542,GO:0043621,GO:0051082,GO:0051259	response to reactive oxygen species|cytoplasm|protein folding|response to heat|response to high light intensity|response to salt stress|heat acclimation|response to hydrogen peroxide|protein self-association|unfolded protein binding|protein complex oligomerization	ko04141	Protein processing in endoplasmic reticulum
CSS0026433	2	1.45674	2.36249e-30	1.54218e-28	HSP18.1A	--	GO:0005737	cytoplasm	ko04141	Protein processing in endoplasmic reticulum
CSS0024647	2	0.879523	7.33587e-05	0.0009294	ubiquitin thioesterase otubain-like	--	GO:0004843,GO:0005634,GO:0019784,GO:0043130,GO:0071108	thiol-dependent ubiquitin-specific protease activity|nucleus|NEDD8-specific protease activity|ubiquitin binding|protein K48-linked deubiquitination	--	--
CSS0036258	2	1.05113	3.27445e-10	7.68424e-09	E3 ubiquitin-protein like	--	--	--	--	--
CSS0021482	1	1.0535	4.1541e-06	6.34287e-05	proline transporter 1	--	GO:0003333,GO:0005886,GO:0015171,GO:0015193,GO:0015824,GO:0016021	amino acid transmembrane transport|plasma membrane|amino acid transmembrane transporter activity|L-proline transmembrane transporter activity|proline transport|integral component of membrane	--	--
CSS0048931	2	0.865085	1.07084e-09	2.40677e-08	Protein transport protein like	--	GO:0000139,GO:0005783,GO:0005789,GO:0006886,GO:0006888,GO:0030134,GO:0030173	Golgi membrane|endoplasmic reticulum|endoplasmic reticulum membrane|intracellular protein transport|ER to Golgi vesicle-mediated transport|COPII-coated ER to Golgi transport vesicle|integral component of Golgi membrane	--	--
CSS0021506	2	4.34018	2.87324e-95	7.60055e-93	HSP18.1A	--	GO:0000302,GO:0005737,GO:0006457,GO:0009408,GO:0009644,GO:0009651,GO:0010286,GO:0042542,GO:0043621,GO:0051082,GO:0051259	response to reactive oxygen species|cytoplasm|protein folding|response to heat|response to high light intensity|response to salt stress|heat acclimation|response to hydrogen peroxide|protein self-association|unfolded protein binding|protein complex oligomerization	ko04141	Protein processing in endoplasmic reticulum
CSS0035226	2	5.14012	5.25147e-53	6.47147e-51	HSP18.1A	--	GO:0000302,GO:0005737,GO:0006457,GO:0009408,GO:0009644,GO:0009651,GO:0010286,GO:0042542,GO:0043621,GO:0051082,GO:0051259	response to reactive oxygen species|cytoplasm|protein folding|response to heat|response to high light intensity|response to salt stress|heat acclimation|response to hydrogen peroxide|protein self-association|unfolded protein binding|protein complex oligomerization	ko04141	Protein processing in endoplasmic reticulum
CSS0038847	2	0.951666	0.000790749	0.00824615	60S ribosomal protein L35a-3	--	GO:0002181,GO:0003735,GO:0022625,GO:0042273	cytoplasmic translation|structural constituent of ribosome|cytosolic large ribosomal subunit|ribosomal large subunit biogenesis	ko03010	Ribosome
CSS0012253	2	0.950217	0.000245894	0.00283583	Acid phosphatase protein	--	GO:0016021,GO:0046686	integral component of membrane|response to cadmium ion	--	--
CSS0031201	2	1.15713	1.25944e-09	2.81189e-08	Transcription factor DIVARICATA like	MYB-related	GO:0003677,GO:0005634,GO:0009908,GO:0048262	DNA binding|nucleus|flower development|determination of dorsal/ventral asymmetry	--	--
CSS0010196	2	0.755038	7.77065e-30	4.96349e-28	C2 domain containing protein	--	--	--	--	--
CSS0037648	2	1.36852	1.0501e-05	0.000151633	uncharacterized acetyltransferase At3g50280	--	GO:0016747	transferase activity, transferring acyl groups other than amino-acyl groups	--	--
CSS0043457	2	0.821839	9.86595e-08	1.8133e-06	Eukaryotic translation initiation factor 3 subunit F like	--	GO:0001732,GO:0003743,GO:0005634,GO:0005737,GO:0005829,GO:0006413,GO:0009744,GO:0009793,GO:0009846,GO:0016020,GO:0016282,GO:0031369,GO:0033290,GO:0071541	formation of cytoplasmic translation initiation complex|translation initiation factor activity|nucleus|cytoplasm|cytosol|translational initiation|response to sucrose|embryo development ending in seed dormancy|pollen germination|membrane|eukaryotic 43S preinitiation complex|translation initiation factor binding|eukaryotic 48S preinitiation complex|eukaryotic translation initiation factor 3 complex…	ko03013	RNA transport
CSS0028641	2	0.875219	2.44713e-08	4.83163e-07	PREDICTED: clathrin light chain 2	--	GO:0005198,GO:0005886,GO:0006886,GO:0030125,GO:0030130,GO:0030132,GO:0032050,GO:0048268,GO:0072583	structural molecule activity|plasma membrane|intracellular protein transport|clathrin vesicle coat|clathrin coat of trans-Golgi network vesicle|clathrin coat of coated pit|clathrin heavy chain binding|clathrin coat assembly|clathrin-dependent endocytosis	--	--
CSS0025442	2	0.939288	0.00038287	0.00427125	protein yippee-like	--	GO:0046872	metal ion binding	--	--
CSS0007250	2	0.855068	3.88332e-05	0.000514973	unnamed protein product, partial	--	GO:0005737,GO:0006457,GO:0007275,GO:0032502,GO:0051082	cytoplasm|protein folding|multicellular organism development|developmental process|unfolded protein binding	--	--
CSS0029266	2	0.822587	5.35e-10	1.23711e-08	Phosphoinositide phospholipase	--	GO:0004435,GO:0004629,GO:0005622,GO:0005886,GO:0009553,GO:0009556,GO:0010601,GO:0016042,GO:0035556,GO:0042742,GO:0048437	phosphatidylinositol phospholipase C activity|phospholipase C activity|intracellular|plasma membrane|embryo sac development|microsporogenesis|positive regulation of auxin biosynthetic process|lipid catabolic process|intracellular signal transduction|defense response to bacterium|floral organ development	ko00562,ko04070,ko04933	Inositol phosphate metabolism|Phosphatidylinositol signaling system|AGE-RAGE signaling pathway in diabetic complications
CSS0003100	1	1.17986	2.86919e-13	8.41356e-12	Protein like	--	GO:0004722,GO:0005634,GO:0009536,GO:0009611,GO:0009620,GO:0009738,GO:0046872,GO:0050832	protein serine/threonine phosphatase activity|nucleus|plastid|response to wounding|response to fungus|abscisic acid-activated signaling pathway|metal ion binding|defense response to fungus	--	--
CSS0045603	1	0.99875	5.44441e-17	1.9847e-15	Cytosolic endo-beta-N-acetylglucosaminidase	--	GO:0005737,GO:0005773,GO:0005829,GO:0006491,GO:0006517,GO:0033925	cytoplasm|vacuole|cytosol|N-glycan processing|protein deglycosylation|mannosyl-glycoprotein endo-beta-N-acetylglucosaminidase activity	ko00511	Other glycan degradation
CSS0035921	1	3.18943	7.28812e-16	2.49988e-14	Laccase-12 like	--	GO:0005507,GO:0016722,GO:0046274,GO:0046688,GO:0048046,GO:0052716	copper ion binding|oxidoreductase activity, oxidizing metal ions|lignin catabolic process|response to copper ion|apoplast|hydroquinone:oxygen oxidoreductase activity	--	--
CSS0029123	2	1.07087	0	0	Polyadenylate-binding protein-interacting protein	--	GO:0005737,GO:0009414,GO:0009617,GO:0009644	cytoplasm|response to water deprivation|response to bacterium|response to high light intensity	--	--
CSS0002812	2	0.892273	1.56918e-05	0.000220844	Protein RETICULATA-RELATED 6 like	--	GO:0007275,GO:0009507,GO:0016021,GO:0031969	multicellular organism development|chloroplast|integral component of membrane|chloroplast membrane	--	--
CSS0041964	2	0.963407	0.000549883	0.00593916	Staphylococcal-like	--	GO:0004518,GO:0004520,GO:0004521,GO:0005634,GO:0005737,GO:0005886,GO:0006308,GO:0006401,GO:0046872	nuclease activity|endodeoxyribonuclease activity|endoribonuclease activity|nucleus|cytoplasm|plasma membrane|DNA catabolic process|RNA catabolic process|metal ion binding	--	--
CSS0026721	2	0.981023	5.30646e-22	2.43736e-20	PREDICTED: wound-induced protein 1-like, partial	--	--	--	--	--
CSS0009982	2	0.686977	3.44345e-52	4.15227e-50	Protein required for fusion of vesicles in vesicular transport, alpha-SNAP	--	GO:0005622,GO:0006886,GO:0016020,GO:0016192	intracellular|intracellular protein transport|membrane|vesicle-mediated transport	--	--
CSS0029068	2	0.866404	9.33012e-08	1.7192e-06	sodium-coupled neutral amino acid transporter 5	--	GO:0003333,GO:0015171,GO:0016021	amino acid transmembrane transport|amino acid transmembrane transporter activity|integral component of membrane	--	--
CSS0016666	2	1.08555	5.90074e-06	8.84205e-05	HIG1 domain family member 1B like	--	--	--	--	--
CSS0001194	1	2.4889	3.84586e-06	5.89896e-05	Peroxidase	--	GO:0004601,GO:0005576,GO:0006979,GO:0020037,GO:0042744,GO:0046872	peroxidase activity|extracellular region|response to oxidative stress|heme binding|hydrogen peroxide catabolic process|metal ion binding	ko00940	Phenylpropanoid biosynthesis
CSS0012020	2	0.783315	6.47523e-19	2.58625e-17	Alpha-galactosidase	--	GO:0004557,GO:0005773,GO:0005975,GO:0009505,GO:0048046,GO:0052692,GO:0071555	alpha-galactosidase activity|vacuole|carbohydrate metabolic process|plant-type cell wall|apoplast|raffinose alpha-galactosidase activity|cell wall organization	ko00052,ko00561,ko00600,ko00603	Galactose metabolism|Glycerolipid metabolism|Sphingolipid metabolism|Glycosphingolipid biosynthesis - globo and isoglobo series
CSS0036286	2	0.879809	8.22358e-07	1.36676e-05	unnamed protein product, partial	--	GO:0004830,GO:0005524,GO:0005829,GO:0006436	tryptophan-tRNA ligase activity|ATP binding|cytosol|tryptophanyl-tRNA aminoacylation	ko00970	Aminoacyl-tRNA biosynthesis
CSS0047619	2	1.11892	6.19161e-05	0.000794996	Protein NETWORKED 4A like	--	GO:0005774,GO:0051015	vacuolar membrane|actin filament binding	--	--
CSS0017040	2	0.936344	6.68028e-06	9.94464e-05	Pterin-4-alpha-carbinolamine dehydratase	--	GO:0005634,GO:0005886,GO:0006729,GO:0008124,GO:0009507,GO:0009570,GO:0009651,GO:0009737,GO:0071944,GO:0110102	nucleus|plasma membrane|tetrahydrobiopterin biosynthetic process|4-alpha-hydroxytetrahydrobiopterin dehydratase activity|chloroplast|chloroplast stroma|response to salt stress|response to abscisic acid|cell periphery|chloroplast ribulose bisphosphate carboxylase complex assembly	--	--
CSS0034454	2	0.959384	2.04838e-32	1.44143e-30	Glutamate dehydrogenase	--	GO:0004353,GO:0006520	glutamate dehydrogenase [NAD(P)+] activity|cellular amino acid metabolic process	--	--
CSS0033865	2	0.934944	1.17362e-05	0.000168314	Polyadenylate-binding protein	--	GO:0005634,GO:0005774,GO:0008143,GO:0016607,GO:0043621	nucleus|vacuolar membrane|poly(A) binding|nuclear speck|protein self-association	ko03015	mRNA surveillance pathway
CSS0031726	2	0.987421	9.75777e-05	0.00120806	U6 snRNA phosphodiesterase	--	--	--	--	--
CSS0018714	2	0.794775	4.70019e-56	6.20045e-54	Nucleoside diphosphate kinase	--	GO:0004550,GO:0005524,GO:0005634,GO:0005777,GO:0006165,GO:0006183,GO:0006228,GO:0006241,GO:0046872,GO:0070301	nucleoside diphosphate kinase activity|ATP binding|nucleus|peroxisome|nucleoside diphosphate phosphorylation|GTP biosynthetic process|UTP biosynthetic process|CTP biosynthetic process|metal ion binding|cellular response to hydrogen peroxide	ko00230,ko00240,ko04016	Purine metabolism|Pyrimidine metabolism|MAPK signaling pathway - plant
CSS0045896	2	0.884601	0.000716091	0.00752819	PREDICTED: 40S ribosomal protein S20-2-like	--	GO:0003729,GO:0003735,GO:0005618,GO:0005730,GO:0005829,GO:0006412,GO:0009506,GO:0016020,GO:0022626,GO:0022627,GO:0042788	mRNA binding|structural constituent of ribosome|cell wall|nucleolus|cytosol|translation|plasmodesma|membrane|cytosolic ribosome|cytosolic small ribosomal subunit|polysomal ribosome	ko03010	Ribosome
CSS0041083	2	0.863401	5.35361e-12	1.43193e-10	hypothetical protein GOBAR_DD10595	--	GO:0003729,GO:0003735,GO:0005618,GO:0005730,GO:0005829,GO:0006412,GO:0009506,GO:0016020,GO:0022626,GO:0022627,GO:0042788	mRNA binding|structural constituent of ribosome|cell wall|nucleolus|cytosol|translation|plasmodesma|membrane|cytosolic ribosome|cytosolic small ribosomal subunit|polysomal ribosome	ko03010	Ribosome
CSS0018956	1	0.9631	4.72857e-21	2.08838e-19	7-deoxyloganetin glucosyltransferase	--	GO:0035251	UDP-glucosyltransferase activity	--	--
CSS0028646	2	0.843364	4.39922e-14	1.35283e-12	2-haloacrylate reductase	--	GO:0003960,GO:0005634,GO:0005737,GO:0005829,GO:0017091,GO:0034599,GO:1990748	NADPH:quinone reductase activity|nucleus|cytoplasm|cytosol|AU-rich element binding|cellular response to oxidative stress|cellular detoxification	--	--
CSS0010737	2	0.738602	4.27585e-20	1.82003e-18	Protein mago nashi like	--	GO:0000184,GO:0003723,GO:0005634,GO:0005737,GO:0006397,GO:0006417,GO:0008380,GO:0035145,GO:0051028	nuclear-transcribed mRNA catabolic process, nonsense-mediated decay|RNA binding|nucleus|cytoplasm|mRNA processing|regulation of translation|RNA splicing|exon-exon junction complex|mRNA transport	--	--
CSS0007267	2	0.878031	3.26283e-07	5.66096e-06	luc7-like protein 3	--	GO:0000395,GO:0003729,GO:0005634,GO:0005685,GO:0005829,GO:0006376,GO:0071004	mRNA 5'-splice site recognition|mRNA binding|nucleus|U1 snRNP|cytosol|mRNA splice site selection|U2-type prespliceosome	--	--
CSS0016220	1	1.84277	9.19517e-06	0.000133732	Pectinesterase inhibitor domain protein	--	GO:0004857,GO:0043086,GO:0046910,GO:0048046,GO:0071669	enzyme inhibitor activity|negative regulation of catalytic activity|pectinesterase inhibitor activity|apoplast|plant-type cell wall organization or biogenesis	--	--
CSS0014172	1	3.90886	0.000180751	0.00213027	pectinesterase inhibitor 4	--	GO:0004857,GO:0043086,GO:0046910,GO:0048046,GO:0071669	enzyme inhibitor activity|negative regulation of catalytic activity|pectinesterase inhibitor activity|apoplast|plant-type cell wall organization or biogenesis	--	--
CSS0028450	2	1.39758	3.90229e-05	0.00051681	21 kDa protein-like	--	GO:0004857	enzyme inhibitor activity	--	--
CSS0012806	1	2.35913	3.18122e-07	5.52607e-06	Pectinesterase inhibitor domain protein	--	GO:0004857	enzyme inhibitor activity	--	--
CSS0015308	2	0.923724	0.000253474	0.00291793	Chloride conductance regulatory protein	--	GO:0000387,GO:0005634,GO:0005829,GO:0005886,GO:0006821,GO:0006884,GO:0034709,GO:0034715	spliceosomal snRNP assembly|nucleus|cytosol|plasma membrane|chloride transport|cell volume homeostasis|methylosome|pICln-Sm protein complex	--	--
CSS0034181	2	0.985764	0.000610905	0.00651731	Peptidyl-prolyl cis-trans isomerase	--	GO:0003755,GO:0005634,GO:0005730,GO:0005829,GO:0006334,GO:0042393	peptidyl-prolyl cis-trans isomerase activity|nucleus|nucleolus|cytosol|nucleosome assembly|histone binding	--	--
CSS0039585	2	0.958659	2.29918e-12	6.35133e-11	Enolase	--	GO:0000015,GO:0000287,GO:0004634,GO:0006096	phosphopyruvate hydratase complex|magnesium ion binding|phosphopyruvate hydratase activity|glycolytic process	--	--
CSS0019461	2	1.42335	3.9596e-12	1.06983e-10	gibberellin 20-oxidase	--	GO:0005737,GO:0009686,GO:0009739,GO:0009740,GO:0009826,GO:0009908,GO:0045544,GO:0046872,GO:0048366,GO:0048575,GO:0051213	cytoplasm|gibberellin biosynthetic process|response to gibberellin|gibberellic acid mediated signaling pathway|unidimensional cell growth|flower development|gibberellin 20-oxidase activity|metal ion binding|leaf development|short-day photoperiodism, flowering|dioxygenase activity	--	--
CSS0031541	2	0.72026	4.36442e-18	1.68588e-16	fructokinase 1	--	GO:0005524,GO:0005829,GO:0006000,GO:0006633,GO:0008865,GO:0016051,GO:0019200,GO:0019252,GO:0046686	ATP binding|cytosol|fructose metabolic process|fatty acid biosynthetic process|fructokinase activity|carbohydrate biosynthetic process|carbohydrate kinase activity|starch biosynthetic process|response to cadmium ion	ko00051,ko00500,ko00520	Fructose and mannose metabolism|Starch and sucrose metabolism|Amino sugar and nucleotide sugar metabolism
CSS0046699	2	0.908781	9.03362e-06	0.000131534	UDP-N-acetylglucosamine--N-acetylmuramyl-pyrophosphoryl-undecaprenol N-acetylglucosamine transferase	--	--	--	--	--
CSS0048006	2	0.852665	1.78443e-16	6.3447e-15	dna-directed rna polymerases ii, iv and v subunit 6a	--	GO:0000419,GO:0003677,GO:0003899,GO:0005665,GO:0005666,GO:0005736,GO:0006360,GO:0006366,GO:0006383	RNA polymerase V complex|DNA binding|DNA-directed 5'-3' RNA polymerase activity|RNA polymerase II, core complex|RNA polymerase III complex|RNA polymerase I complex|transcription by RNA polymerase I|transcription by RNA polymerase II|transcription by RNA polymerase III	ko03020	RNA polymerase
CSS0035970	2	0.92142	1.2425e-05	0.000177689	Sucrose-phosphate synthase	--	--	--	--	--
CSS0048973	2	0.950734	1.41519e-14	4.51406e-13	remorin-like	--	GO:0005886,GO:0007267,GO:0048032	plasma membrane|cell-cell signaling|galacturonate binding	--	--
CSS0044082	2	1.10034	1.08828e-17	4.13111e-16	Beta-carotene hydroxylase	--	GO:0005506,GO:0016021,GO:0016117,GO:0016491,GO:0016787,GO:0031969	iron ion binding|integral component of membrane|carotenoid biosynthetic process|oxidoreductase activity|hydrolase activity|chloroplast membrane	ko00906	Carotenoid biosynthesis
CSS0000705	2	0.800275	0.00017966	0.00211988	NADH dehydrogenase	--	GO:0005739,GO:0005747,GO:0009507,GO:0009853,GO:0016020,GO:0022904,GO:0031966,GO:0045271	mitochondrion|mitochondrial respiratory chain complex I|chloroplast|photorespiration|membrane|respiratory electron transport chain|mitochondrial membrane|respiratory chain complex I	ko00190	Oxidative phosphorylation
CSS0004166	1	1.0554	1.33499e-21	6.04396e-20	ABC transporter C family member 10 like	--	GO:0000325,GO:0005524,GO:0005774,GO:0008559,GO:0016020,GO:0016021,GO:0042626,GO:0055085	plant-type vacuole|ATP binding|vacuolar membrane|xenobiotic transmembrane transporting ATPase activity|membrane|integral component of membrane|ATPase activity, coupled to transmembrane movement of substances|transmembrane transport	ko02010	ABC transporters
CSS0034605	2	0.931442	0.000640354	0.0067999	Protein CURVATURE THYLAKOID 1A like	--	GO:0009507,GO:0009534,GO:0009535,GO:0009579,GO:0009941,GO:0010287,GO:0016021	chloroplast|chloroplast thylakoid|chloroplast thylakoid membrane|thylakoid|chloroplast envelope|plastoglobule|integral component of membrane	--	--
CSS0001959	1	0.841722	6.28336e-05	0.000806357	hypothetical protein GOBAR_DD05886	--	GO:0004842,GO:0005524,GO:0006511,GO:0031625,GO:0061631	ubiquitin-protein transferase activity|ATP binding|ubiquitin-dependent protein catabolic process|ubiquitin protein ligase binding|ubiquitin conjugating enzyme activity	--	--
CSS0006620	2	1.12012	5.50869e-05	0.000713292	spermine synthase	--	GO:0004766,GO:0006596,GO:0006597,GO:0016768	spermidine synthase activity|polyamine biosynthetic process|spermine biosynthetic process|spermine synthase activity	--	--
CSS0022690	2	0.899386	9.12604e-05	0.00113682	CLP protease regulatory subunit like	--	GO:0004176,GO:0005524,GO:0005739,GO:0005759,GO:0006457,GO:0030163,GO:0051082	ATP-dependent peptidase activity|ATP binding|mitochondrion|mitochondrial matrix|protein folding|protein catabolic process|unfolded protein binding	--	--
CSS0047978	2	0.936561	4.61767e-05	0.000604894	Protein phosphatase	--	GO:0004722,GO:0005634,GO:0005730,GO:0005737,GO:0009507,GO:0009570,GO:0009579,GO:0009767,GO:0016021,GO:0016311,GO:0016791,GO:0046872,GO:0080005	protein serine/threonine phosphatase activity|nucleus|nucleolus|cytoplasm|chloroplast|chloroplast stroma|thylakoid|photosynthetic electron transport chain|integral component of membrane|dephosphorylation|phosphatase activity|metal ion binding|photosystem stoichiometry adjustment	--	--
CSS0010966	2	0.776181	8.55807e-35	6.57138e-33	UDP-N-acetylmuramate--L-alanine ligase	--	--	--	--	--
CSS0019406	1	1.10182	5.76205e-21	2.53154e-19	unnamed protein product	--	--	--	--	--
CSS0008203	2	0.893471	1.75554e-14	5.58555e-13	protein yippee-like At4g27745	--	GO:0046872	metal ion binding	--	--
CSS0016118	2	0.885956	5.03647e-10	1.16728e-08	protein PLASTID TRANSCRIPTIONALLY ACTIVE 7-like	--	GO:0000427,GO:0009295,GO:0009416,GO:0009507,GO:0009508,GO:0009658,GO:0010027,GO:0042793	plastid-encoded plastid RNA polymerase complex|nucleoid|response to light stimulus|chloroplast|plastid chromosome|chloroplast organization|thylakoid membrane organization|plastid transcription	--	--
CSS0005632	2	0.810885	0.000396035	0.00440741	PREDICTED: vacuolar protein sorting-associated protein 26A	--	GO:0005768,GO:0005794,GO:0005829,GO:0006886,GO:0008565,GO:0030904,GO:0031902,GO:0042147	endosome|Golgi apparatus|cytosol|intracellular protein transport|protein transporter activity|retromer complex|late endosome membrane|retrograde transport, endosome to Golgi	--	--
CSS0016557	1	0.960365	1.86235e-09	4.10358e-08	AAA-ATPase	--	GO:0005524,GO:0016021,GO:0016887	ATP binding|integral component of membrane|ATPase activity	--	--
CSS0034032	1	1.34469	9.56574e-65	1.50563e-62	unknown	--	GO:0005773,GO:0005774,GO:0005783,GO:0005789,GO:0005886,GO:0009535,GO:0016021,GO:0020037,GO:0046872,GO:0055114	vacuole|vacuolar membrane|endoplasmic reticulum|endoplasmic reticulum membrane|plasma membrane|chloroplast thylakoid membrane|integral component of membrane|heme binding|metal ion binding|oxidation-reduction process	--	--
CSS0020627	2	0.945827	2.52382e-24	1.279e-22	6-phosphogluconolactonase	--	GO:0005975,GO:0009051,GO:0009507,GO:0017057	carbohydrate metabolic process|pentose-phosphate shunt, oxidative branch|chloroplast|6-phosphogluconolactonase activity	ko00030	Pentose phosphate pathway
CSS0017170	2	0.900417	8.06244e-09	1.66403e-07	PREDICTED: uncharacterized protein LOC100262248	--	--	--	--	--
CSS0048493	2	0.956082	1.24104e-11	3.23548e-10	caffeic acid O-methyltransferase	--	GO:0009809,GO:0046983,GO:0047763	lignin biosynthetic process|protein dimerization activity|caffeate O-methyltransferase activity	ko00940	Phenylpropanoid biosynthesis
CSS0016235	2	1.21667	1.47279e-10	3.53673e-09	Ubiquitin carboxyl-terminal hydrolase	--	--	--	--	--
CSS0000739	2	0.801724	1.16352e-22	5.5147e-21	60S ribosomal protein	--	GO:0003735,GO:0005840,GO:0006412,GO:0019843	structural constituent of ribosome|ribosome|translation|rRNA binding	ko03010	Ribosome
CSS0049301	1	0.917891	1.27974e-05	0.000182704	Transmembrane protein	--	--	--	--	--
CSS0037658	2	0.921815	0.000545517	0.00589945	B3 domain-containing protein	B3	GO:0003677,GO:0005634	DNA binding|nucleus	--	--
CSS0020013	2	0.708785	2.03331e-64	3.16102e-62	60S ribosomal protein like	--	GO:0003729,GO:0003735,GO:0005618,GO:0005730,GO:0005774,GO:0005829,GO:0005886,GO:0006412,GO:0009506,GO:0009735,GO:0016020,GO:0022625,GO:0022626,GO:0042788	mRNA binding|structural constituent of ribosome|cell wall|nucleolus|vacuolar membrane|cytosol|plasma membrane|translation|plasmodesma|response to cytokinin|membrane|cytosolic large ribosomal subunit|cytosolic ribosome|polysomal ribosome	--	--
CSS0018534	2	0.958724	5.93155e-17	2.15761e-15	hydrogen peroxide induced protein 1	--	--	--	--	--
CSS0010494	1	1.11572	6.66235e-07	1.11832e-05	Midasin like	--	--	--	--	--
CSS0028217	1	0.915219	3.4827e-05	0.000464897	unnamed protein product, partial	--	GO:0000055,GO:0000056,GO:0005049,GO:0005634,GO:0005643,GO:0005737,GO:0005829,GO:0006611,GO:0008536,GO:0009408,GO:0009553,GO:0009555,GO:0009846,GO:0009860,GO:0031965,GO:0046825,GO:0051028	ribosomal large subunit export from nucleus|ribosomal small subunit export from nucleus|nuclear export signal receptor activity|nucleus|nuclear pore|cytoplasm|cytosol|protein export from nucleus|Ran GTPase binding|response to heat|embryo sac development|pollen development|pollen germination|pollen tube growth|nuclear membrane|regulation of protein export from nucleus|mRNA transport	ko03008,ko03013	Ribosome biogenesis in eukaryotes|RNA transport
CSS0011317	2	0.858792	7.12877e-05	0.000905888	probable NADH dehydrogenase	--	GO:0005739,GO:0005747,GO:0006979,GO:0008137,GO:0009055,GO:0009735,GO:0050897	mitochondrion|mitochondrial respiratory chain complex I|response to oxidative stress|NADH dehydrogenase (ubiquinone) activity|electron transfer activity|response to cytokinin|cobalt ion binding	ko00190	Oxidative phosphorylation
CSS0047215	2	0.860606	1.24637e-09	2.78518e-08	Heat stress transcription factor A-1 like	HSF	GO:0000978,GO:0003700,GO:0005634,GO:0034605,GO:0043565,GO:0061408	RNA polymerase II proximal promoter sequence-specific DNA binding|DNA-binding transcription factor activity|nucleus|cellular response to heat|sequence-specific DNA binding|positive regulation of transcription from RNA polymerase II promoter in response to heat stress	--	--
CSS0020222	2	0.924286	2.77523e-07	4.85689e-06	Serine/threonine-protein kinase	--	--	--	--	--
CSS0024609	2	0.912935	0.000800043	0.0083276	PREDICTED: uncharacterized protein LOC100249521	--	--	--	--	--
CSS0039916	2	0.856331	8.42121e-40	7.51735e-38	PREDICTED: ubiquitin-conjugating enzyme E2-23 kDa-like	--	GO:0004842,GO:0005524,GO:0005829,GO:0006511,GO:0061631	ubiquitin-protein transferase activity|ATP binding|cytosol|ubiquitin-dependent protein catabolic process|ubiquitin conjugating enzyme activity	--	--
CSS0008777	1	0.9433	0.000192788	0.00226421	phosphatidylinositol 4-kinase beta 1-like	--	GO:0004430,GO:0005634,GO:0005737,GO:0005794,GO:0005829,GO:0005886,GO:0009860,GO:0016020,GO:0017137,GO:0030659,GO:0035619,GO:0043424,GO:0046854,GO:0048015,GO:0048768	1-phosphatidylinositol 4-kinase activity|nucleus|cytoplasm|Golgi apparatus|cytosol|plasma membrane|pollen tube growth|membrane|Rab GTPase binding|cytoplasmic vesicle membrane|root hair tip|protein histidine kinase binding|phosphatidylinositol phosphorylation|phosphatidylinositol-mediated signaling|root hair cell tip growth	ko00562,ko04070	Inositol phosphate metabolism|Phosphatidylinositol signaling system
CSS0037755	1	0.98229	5.74974e-08	1.0856e-06	Mitogen-activated protein kinase kinase kinase	--	GO:0004674,GO:0004709,GO:0005524,GO:0005737,GO:0023014,GO:0031098,GO:0032147	protein serine/threonine kinase activity|MAP kinase kinase kinase activity|ATP binding|cytoplasm|signal transduction by protein phosphorylation|stress-activated protein kinase signaling cascade|activation of protein kinase activity	--	--
CSS0046503	1	0.956777	0.000548077	0.00592333	unnamed protein product, partial	--	GO:0004176,GO:0004222,GO:0005524,GO:0005739,GO:0006508,GO:0009507,GO:0009535,GO:0009536,GO:0009793,GO:0009941,GO:0016021	ATP-dependent peptidase activity|metalloendopeptidase activity|ATP binding|mitochondrion|proteolysis|chloroplast|chloroplast thylakoid membrane|plastid|embryo development ending in seed dormancy|chloroplast envelope|integral component of membrane	--	--
CSS0028368	1	1.29824	1.56405e-11	4.04213e-10	Pectinesterase	--	GO:0005576,GO:0005618,GO:0030599,GO:0042545,GO:0045330,GO:0045490,GO:0046910	extracellular region|cell wall|pectinesterase activity|cell wall modification|aspartyl esterase activity|pectin catabolic process|pectinesterase inhibitor activity	--	--
CSS0015835	1	1.16341	0.00010394	0.00128025	Histone-lysine N-methyltransferase	--	GO:0005634,GO:0009507,GO:0018024,GO:0046872	nucleus|chloroplast|histone-lysine N-methyltransferase activity|metal ion binding	--	--
CSS0050441	2	0.745269	9.86905e-06	0.000142957	DEAD/DEAH box RNA helicase family protein isoform 1	--	GO:0005200,GO:0005524,GO:0005618,GO:0005730,GO:0005739,GO:0005829,GO:0005856,GO:0005886,GO:0009416,GO:0009506,GO:0009570,GO:0009611,GO:0009733,GO:0009845,GO:0009941,GO:0010053,GO:0048364,GO:0048767,GO:0051301	structural constituent of cytoskeleton|ATP binding|cell wall|nucleolus|mitochondrion|cytosol|cytoskeleton|plasma membrane|response to light stimulus|plasmodesma|chloroplast stroma|response to wounding|response to auxin|seed germination|chloroplast envelope|root epidermal cell differentiation|root development|root hair elongation|cell division	--	--
CSS0008920	2	0.707069	1.56494e-12	4.38538e-11	hypothetical protein CDL15_Pgr017325	--	GO:0005200,GO:0005524,GO:0005618,GO:0005730,GO:0005739,GO:0005829,GO:0005856,GO:0005886,GO:0009416,GO:0009506,GO:0009570,GO:0009611,GO:0009733,GO:0009845,GO:0009941,GO:0010053,GO:0048364,GO:0048767,GO:0051301	structural constituent of cytoskeleton|ATP binding|cell wall|nucleolus|mitochondrion|cytosol|cytoskeleton|plasma membrane|response to light stimulus|plasmodesma|chloroplast stroma|response to wounding|response to auxin|seed germination|chloroplast envelope|root epidermal cell differentiation|root development|root hair elongation|cell division	--	--
CSS0010804	2	0.926881	9.02631e-05	0.00112523	WD repeat domain-containing protein	--	GO:0080008	Cul4-RING E3 ubiquitin ligase complex	--	--
CSS0027334	2	0.813402	2.88971e-06	4.50487e-05	26S proteasome non-ATPase regulatory subunit 12 A like, partial	--	GO:0005737,GO:0008541,GO:0031595,GO:0043161	cytoplasm|proteasome regulatory particle, lid subcomplex|nuclear proteasome complex|proteasome-mediated ubiquitin-dependent protein catabolic process	--	--
CSS0001280	2	1.07182	7.23597e-12	1.92015e-10	Proline--tRNA ligase	--	--	--	--	--
CSS0021631	2	0.901904	0.000300313	0.00341434	60S ribosomal export protein	--	GO:0000055,GO:0005654,GO:0005737,GO:0043023	ribosomal large subunit export from nucleus|nucleoplasm|cytoplasm|ribosomal large subunit binding	ko03008,ko03013	Ribosome biogenesis in eukaryotes|RNA transport
CSS0039270	2	1.02002	3.39395e-07	5.88064e-06	Ethylene-responsive transcription factor	AP2/ERF-ERF	GO:0003677,GO:0003700,GO:0005634,GO:0006952,GO:0009867,GO:0009873	DNA binding|DNA-binding transcription factor activity|nucleus|defense response|jasmonic acid mediated signaling pathway|ethylene-activated signaling pathway	ko04016,ko04075	MAPK signaling pathway - plant|Plant hormone signal transduction
CSS0041620	1	3.04293	4.96496e-33	3.56834e-31	Rhamnogalacturonate lyase	--	GO:0000272,GO:0005576,GO:0030246,GO:0071555,GO:0102210	polysaccharide catabolic process|extracellular region|carbohydrate binding|cell wall organization|rhamnogalacturonan endolyase activity	--	--
CSS0006841	1	1.00558	1.44939e-09	3.22032e-08	U-box domain-containing protein	--	GO:0004672,GO:0004842,GO:0005524	protein kinase activity|ubiquitin-protein transferase activity|ATP binding	--	--
CSS0046669	1	0.981351	1.16208e-10	2.80661e-09	U-box domain-containing protein	--	GO:0004672,GO:0004842,GO:0005524	protein kinase activity|ubiquitin-protein transferase activity|ATP binding	--	--
CSS0014480	1	0.965454	9.08716e-08	1.67565e-06	Amelogenin, X like	--	--	--	--	--
CSS0025248	2	0.836431	7.76592e-29	4.73309e-27	hypothetical protein JCGZ_15866	--	GO:0019904	protein domain specific binding	--	--
CSS0016123	2	0.938428	0.000411038	0.00456032	39S ribosomal protein L41-A, mitochondrial-like	--	GO:0003735,GO:0005762,GO:0006412,GO:0032543	structural constituent of ribosome|mitochondrial large ribosomal subunit|translation|mitochondrial translation	--	--
CSS0021212	1	1.09359	1.63379e-21	7.36372e-20	WEB family protein	--	--	--	--	--
CSS0003567	2	1.14865	5.82456e-08	1.09849e-06	LanC-like protein	--	GO:0003824,GO:0005886,GO:0019898	catalytic activity|plasma membrane|extrinsic component of membrane	--	--
CSS0044987	1	0.961117	4.65441e-08	8.87746e-07	PREDICTED: ABC transporter G family member 11-like	--	GO:0005524,GO:0005886,GO:0009611,GO:0009651,GO:0009737,GO:0009897,GO:0010222,GO:0010588,GO:0015245,GO:0015908,GO:0016021,GO:0042626,GO:0042803,GO:0055085,GO:0080051	ATP binding|plasma membrane|response to wounding|response to salt stress|response to abscisic acid|external side of plasma membrane|stem vascular tissue pattern formation|cotyledon vascular tissue pattern formation|fatty acid transmembrane transporter activity|fatty acid transport|integral component of membrane|ATPase activity, coupled to transmembrane movement of substances|protein homodimerizat…	--	--
CSS0049658	2	0.762639	0.000458051	0.00504755	unnamed protein product	--	GO:0003723,GO:0005737,GO:0016607	RNA binding|cytoplasm|nuclear speck	ko03015	mRNA surveillance pathway
CSS0008069	2	0.902478	2.9152e-06	4.5404e-05	Myb-like protein	--	--	--	--	--
CSS0032369	2	0.964059	2.06452e-05	0.000286094	PREDICTED: asparagine synthetase	--	GO:0004066,GO:0005524,GO:0005829,GO:0006529,GO:0006541,GO:0042803,GO:0070981	asparagine synthase (glutamine-hydrolyzing) activity|ATP binding|cytosol|asparagine biosynthetic process|glutamine metabolic process|protein homodimerization activity|L-asparagine biosynthetic process	--	--
CSS0037925	2	0.863203	2.92419e-13	8.56491e-12	Oxidation resistance protein	--	GO:0005739	mitochondrion	--	--
CSS0001458	2	1.40644	1.76504e-09	3.89426e-08	annexin D2-like	--	GO:0004601,GO:0005507,GO:0005509,GO:0005524,GO:0005544,GO:0005634,GO:0005829,GO:0008270,GO:0009408,GO:0009409,GO:0009414,GO:0009579,GO:0009651,GO:0015774,GO:0016020,GO:0042803,GO:0048046	peroxidase activity|copper ion binding|calcium ion binding|ATP binding|calcium-dependent phospholipid binding|nucleus|cytosol|zinc ion binding|response to heat|response to cold|response to water deprivation|thylakoid|response to salt stress|polysaccharide transport|membrane|protein homodimerization activity|apoplast	--	--
CSS0007650	2	0.942993	5.74166e-05	0.000741407	PREDICTED: uncharacterized protein LOC103932601	--	--	--	--	--
CSS0040169	2	0.960252	0.000970372	0.00990866	PREDICTED: ABC transporter D family member 1-like	--	GO:0005324,GO:0005524,GO:0016021,GO:0016042,GO:0042626,GO:0046861	long-chain fatty acid transporter activity|ATP binding|integral component of membrane|lipid catabolic process|ATPase activity, coupled to transmembrane movement of substances|glyoxysomal membrane	--	--
CSS0003256	2	1.45827	4.1551e-73	7.74673e-71	PLAT domain-containing protein	--	GO:0004096,GO:0005773,GO:0005774,GO:0005783,GO:0005886,GO:0009409,GO:0009414,GO:0009507,GO:0009535,GO:0009579,GO:0009651,GO:0010287,GO:0020037,GO:0040008	catalase activity|vacuole|vacuolar membrane|endoplasmic reticulum|plasma membrane|response to cold|response to water deprivation|chloroplast|chloroplast thylakoid membrane|thylakoid|response to salt stress|plastoglobule|heme binding|regulation of growth	--	--
CSS0045703	2	1.51783	0.000366193	0.00410345	Trehalose-phosphate phosphatase	--	GO:0004805,GO:0005634,GO:0005730,GO:0005992,GO:0046686	trehalose-phosphatase activity|nucleus|nucleolus|trehalose biosynthetic process|response to cadmium ion	ko00500	Starch and sucrose metabolism
CSS0035982	2	0.981092	0.000558833	0.00602669	PREDICTED: uncharacterized protein LOC105111864	--	GO:0005737,GO:0005794,GO:0005886,GO:0008017,GO:0008360,GO:0009414,GO:0009506,GO:0009833,GO:0009898,GO:0009901,GO:0010208,GO:0010215,GO:0010330,GO:0030244,GO:0036449,GO:0040008,GO:0043622,GO:0048467,GO:0048868,GO:0051211,GO:0051592,GO:0055028,GO:0070507,GO:0072699,GO:2000067	cytoplasm|Golgi apparatus|plasma membrane|microtubule binding|regulation of cell shape|response to water deprivation|plasmodesma|plant-type primary cell wall biogenesis|cytoplasmic side of plasma membrane|anther dehiscence|pollen wall assembly|cellulose microfibril organization|cellulose synthase complex|cellulose biosynthetic process|microtubule minus-end|regulation of growth|cortical microtubul…	--	--
CSS0032066	1	0.902432	3.78947e-14	1.17318e-12	Apoptotic chromatin condensation inducer in the nucleus like	--	--	--	--	--
CSS0018893	2	1.10003	4.49759e-12	1.21066e-10	Retrotransposon-like protein	--	--	--	--	--
CSS0041778	2	0.954406	1.07821e-15	3.6537e-14	hypothetical protein PRUPE_6G177500	--	--	--	--	--
CSS0011733	2	0.984128	2.86602e-21	1.27582e-19	Retrotransposon-like protein	--	--	--	--	--
CSS0026039	2	0.987531	8.93194e-16	3.04306e-14	bZIP transcription factor 12-1	bZIP	GO:0003700,GO:0005634,GO:0006351,GO:0042742,GO:0043565,GO:0044212	DNA-binding transcription factor activity|nucleus|transcription, DNA-templated|defense response to bacterium|sequence-specific DNA binding|transcription regulatory region DNA binding	--	--
CSS0019014	2	0.948915	0.00042563	0.00471289	PREDICTED: alanine--glyoxylate aminotransferase 2 homolog 1, mitochondrial	--	GO:0005739,GO:0005774,GO:0008270,GO:0008453,GO:0009853,GO:0016020,GO:0030170,GO:0046686	mitochondrion|vacuolar membrane|zinc ion binding|alanine-glyoxylate transaminase activity|photorespiration|membrane|pyridoxal phosphate binding|response to cadmium ion	ko00250,ko00260,ko00270,ko00280	Alanine, aspartate and glutamate metabolism|Glycine, serine and threonine metabolism|Cysteine and methionine metabolism|Valine, leucine and isoleucine degradation
CSS0027796	2	1.03629	4.0431e-07	6.95295e-06	Stress enhanced protein	--	GO:0009523,GO:0009535,GO:0009611,GO:0009765,GO:0016021,GO:0016168,GO:0071486,GO:0071492	photosystem II|chloroplast thylakoid membrane|response to wounding|photosynthesis, light harvesting|integral component of membrane|chlorophyll binding|cellular response to high light intensity|cellular response to UV-A	--	--
CSS0005033	2	0.991562	1.96623e-07	3.51163e-06	Stress enhanced protein	--	GO:0009523,GO:0009535,GO:0009611,GO:0009765,GO:0016021,GO:0016168,GO:0071486,GO:0071492	photosystem II|chloroplast thylakoid membrane|response to wounding|photosynthesis, light harvesting|integral component of membrane|chlorophyll binding|cellular response to high light intensity|cellular response to UV-A	--	--
CSS0021781	2	0.932962	1.21818e-14	3.89546e-13	uncharacterized protein LOC105179012	--	--	--	--	--
CSS0049252	1	0.99125	1.31994e-06	2.14507e-05	hypothetical protein CEY00_Acc08038	--	--	--	--	--
CSS0045275	2	1.16385	2.60961e-17	9.69491e-16	photosystem I reaction center subunit N (chloroplast)	--	GO:0015979,GO:0019904,GO:0030093	photosynthesis|protein domain specific binding|chloroplast photosystem I	--	--
CSS0021222	1	1.20823	2.46404e-17	9.17434e-16	hypothetical protein CEY00_Acc08038	--	--	--	--	--
CSS0010064	2	1.04803	5.11355e-23	2.46294e-21	photosystem I reaction center subunit N (chloroplast)	--	GO:0015979,GO:0019904,GO:0030093	photosynthesis|protein domain specific binding|chloroplast photosystem I	--	--
CSS0050045	2	0.949093	7.68987e-05	0.000971327	RNA polymerase II transcriptional coactivator KIWI like	--	GO:0003677,GO:0003713,GO:0005634,GO:0005667,GO:0060261	DNA binding|transcription coactivator activity|nucleus|transcription factor complex|positive regulation of transcription initiation from RNA polymerase II promoter	--	--
CSS0001846	1	0.952519	1.00742e-06	1.65851e-05	Glucan 1,3-alpha-glucosidase	--	GO:0005783,GO:0009507,GO:0009826,GO:0015926,GO:0030244,GO:0030246,GO:0033919,GO:0042742,GO:0046686	endoplasmic reticulum|chloroplast|unidimensional cell growth|glucosidase activity|cellulose biosynthetic process|carbohydrate binding|glucan 1,3-alpha-glucosidase activity|defense response to bacterium|response to cadmium ion	ko00510,ko04141	N-Glycan biosynthesis|Protein processing in endoplasmic reticulum
CSS0001624	2	0.852329	0.000485951	0.00532134	DNA-directed RNA polymerase II subunit like	--	GO:0000166,GO:0000288,GO:0000932,GO:0003899,GO:0005665,GO:0006366,GO:0006367,GO:0031369,GO:0031990,GO:0034402,GO:0045948	nucleotide binding|nuclear-transcribed mRNA catabolic process, deadenylation-dependent decay|P-body|DNA-directed 5'-3' RNA polymerase activity|RNA polymerase II, core complex|transcription by RNA polymerase II|transcription initiation from RNA polymerase II promoter|translation initiation factor binding|mRNA export from nucleus in response to heat stress|recruitment of 3'-end processing factors t…	ko03020	RNA polymerase
CSS0027702	2	0.80408	6.26735e-16	2.16296e-14	DNA-directed RNA polymerases II and V subunit 8A like	--	GO:0000419,GO:0005665,GO:0005666,GO:0005736,GO:0006360,GO:0006366,GO:0006383	RNA polymerase V complex|RNA polymerase II, core complex|RNA polymerase III complex|RNA polymerase I complex|transcription by RNA polymerase I|transcription by RNA polymerase II|transcription by RNA polymerase III	ko03020	RNA polymerase
CSS0022808	1	1.20653	4.62673e-08	8.82801e-07	germin-like protein	--	GO:0005618,GO:0030145,GO:0045735,GO:0048046	cell wall|manganese ion binding|nutrient reservoir activity|apoplast	--	--
CSS0028284	2	0.924244	5.27101e-05	0.000684622	Farnesylcysteine lyase	--	GO:0001735,GO:0005764,GO:0005773,GO:0005774,GO:0009738,GO:0030327,GO:0030328,GO:0045338,GO:0102149	prenylcysteine oxidase activity|lysosome|vacuole|vacuolar membrane|abscisic acid-activated signaling pathway|prenylated protein catabolic process|prenylcysteine catabolic process|farnesyl diphosphate metabolic process|farnesylcysteine lyase activity	--	--
CSS0031337	2	0.654858	1.04102e-48	1.15854e-46	probable mannitol dehydrogenase	--	GO:0008270,GO:0046029	zinc ion binding|mannitol dehydrogenase activity	--	--
CSS0033438	2	1.0343	0.000138328	0.00166925	Methyltransferase	--	GO:0003729,GO:0005737,GO:0008168,GO:0008757,GO:0055088	mRNA binding|cytoplasm|methyltransferase activity|S-adenosylmethionine-dependent methyltransferase activity|lipid homeostasis	--	--
CSS0041863	1	0.841368	1.73923e-19	7.15593e-18	PREDICTED: beta-1,3-galactosyltransferase 7	--	GO:0000139,GO:0005783,GO:0005794,GO:0006486,GO:0016021,GO:0048531	Golgi membrane|endoplasmic reticulum|Golgi apparatus|protein glycosylation|integral component of membrane|beta-1,3-galactosyltransferase activity	--	--
CSS0039604	2	1.13408	0.000908646	0.00933685	myb-related protein 308-like	MYB	GO:0003677,GO:0005634	DNA binding|nucleus	--	--
CSS0034970	2	0.976542	7.19706e-16	2.472e-14	Aspartate carbamoyltransferase	--	--	--	--	--
CSS0029177	2	0.942993	1.97541e-06	3.14751e-05	2-oxoglutarate-dependent dioxygenase	--	GO:0009852,GO:0010252,GO:0046872,GO:0050302,GO:0051213	auxin catabolic process|auxin homeostasis|metal ion binding|indole-3-acetaldehyde oxidase activity|dioxygenase activity	ko00380	Tryptophan metabolism
CSS0027456	1	1.04588	2.48891e-17	9.26009e-16	3-hydroxy-3-methylglutaryl coenzyme a reductase	--	GO:0004420,GO:0005789,GO:0008299,GO:0015936,GO:0016021,GO:0050661	hydroxymethylglutaryl-CoA reductase (NADPH) activity|endoplasmic reticulum membrane|isoprenoid biosynthetic process|coenzyme A metabolic process|integral component of membrane|NADP binding	ko00900	Terpenoid backbone biosynthesis
CSS0007198	2	0.882969	0.000388957	0.00433437	PREDICTED: eukaryotic translation initiation factor 6-2	--	GO:0000054,GO:0003743,GO:0005634,GO:0005730,GO:0005829,GO:0009793,GO:0030687,GO:0042256,GO:0042273,GO:0043022,GO:0043023,GO:0071215,GO:1902626	ribosomal subunit export from nucleus|translation initiation factor activity|nucleus|nucleolus|cytosol|embryo development ending in seed dormancy|preribosome, large subunit precursor|mature ribosome assembly|ribosomal large subunit biogenesis|ribosome binding|ribosomal large subunit binding|cellular response to abscisic acid stimulus|assembly of large subunit precursor of preribosome	ko03008	Ribosome biogenesis in eukaryotes
CSS0043836	1	0.845172	6.95916e-11	1.71267e-09	Mlo protein	--	GO:0005516,GO:0006952,GO:0009607,GO:0016021	calmodulin binding|defense response|response to biotic stimulus|integral component of membrane	--	--
CSS0016679	1	0.926939	2.21444e-07	3.92991e-06	Endoribonuclease	--	GO:0004521,GO:0004674,GO:0005524,GO:0005783,GO:0006397,GO:0008380,GO:0009751,GO:0009816,GO:0016021,GO:0030968,GO:0042406,GO:0046777,GO:0046872	endoribonuclease activity|protein serine/threonine kinase activity|ATP binding|endoplasmic reticulum|mRNA processing|RNA splicing|response to salicylic acid|defense response to bacterium, incompatible interaction|integral component of membrane|endoplasmic reticulum unfolded protein response|extrinsic component of endoplasmic reticulum membrane|protein autophosphorylation|metal ion binding	ko04141	Protein processing in endoplasmic reticulum
CSS0026334	1	0.943295	0.000259172	0.00298013	PREDICTED: uncharacterized protein LOC100262676 isoform X1	--	--	--	--	--
CSS0008853	2	1.58516	5.36902e-36	4.29224e-34	High mobility group B protein	--	GO:0003677,GO:0005634	DNA binding|nucleus	--	--
CSS0042264	1	1.05161	2.71399e-06	4.2414e-05	putative serinethreonine-protein kinase cx32, chloroplastic	--	--	--	--	--
CSS0047426	1	1.9568	1.48762e-29	9.38352e-28	chitinase	--	GO:0000272,GO:0004568,GO:0006032,GO:0006952,GO:0008061,GO:0016998	polysaccharide catabolic process|chitinase activity|chitin catabolic process|defense response|chitin binding|cell wall macromolecule catabolic process	ko00520,ko04016	Amino sugar and nucleotide sugar metabolism|MAPK signaling pathway - plant
CSS0036369	2	0.783582	3.80855e-235	3.49867e-232	Rhodanese-like domain-containing protein	--	GO:0006979,GO:0007568,GO:0009507,GO:0009579,GO:0009611,GO:0009753	response to oxidative stress|aging|chloroplast|thylakoid|response to wounding|response to jasmonic acid	--	--
CSS0038465	2	0.841529	3.07363e-45	3.1564e-43	Serine/threonine-protein kinase	--	GO:0004674,GO:0004712,GO:0005524,GO:0005829,GO:0009658	protein serine/threonine kinase activity|protein serine/threonine/tyrosine kinase activity|ATP binding|cytosol|chloroplast organization	--	--
CSS0002031	2	0.946616	2.78998e-05	0.000377515	Bifunctional nuclease	--	GO:0004518,GO:0005634	nuclease activity|nucleus	--	--
CSS0042076	2	0.813035	4.49962e-05	0.000590503	Protein like	--	GO:0004722,GO:0005886,GO:0046872	protein serine/threonine phosphatase activity|plasma membrane|metal ion binding	--	--
CSS0006800	2	0.995595	1.30172e-52	1.5848e-50	SKP1-like protein	--	GO:0000226,GO:0005634,GO:0005819,GO:0005829,GO:0005886,GO:0006511,GO:0007059,GO:0007275,GO:0009524,GO:0009734,GO:0009873,GO:0016032,GO:0016567,GO:0045910,GO:0046686	microtubule cytoskeleton organization|nucleus|spindle|cytosol|plasma membrane|ubiquitin-dependent protein catabolic process|chromosome segregation|multicellular organism development|phragmoplast|auxin-activated signaling pathway|ethylene-activated signaling pathway|viral process|protein ubiquitination|negative regulation of DNA recombination|response to cadmium ion	ko04120,ko04141	Ubiquitin mediated proteolysis|Protein processing in endoplasmic reticulum
CSS0036080	2	0.974181	8.91288e-05	0.00111301	protein POLLENLESS 3-LIKE 2	--	GO:0005634,GO:0007049,GO:0051301	nucleus|cell cycle|cell division	--	--
CSS0009543	2	0.908329	8.52541e-08	1.57667e-06	PREDICTED: uncharacterized protein LOC109020859	--	--	--	--	--
CSS0050163	2	0.921522	1.03443e-08	2.1083e-07	PREDICTED: proteasome subunit alpha type-7	--	GO:0004298,GO:0005634,GO:0005737,GO:0006511,GO:0019773	threonine-type endopeptidase activity|nucleus|cytoplasm|ubiquitin-dependent protein catabolic process|proteasome core complex, alpha-subunit complex	ko03050	Proteasome
CSS0036680	2	0.844243	0.000151133	0.00180905	26S proteasome non-ATPase regulatory subunit like	--	GO:0005634,GO:0005829,GO:0008540,GO:0031593,GO:0043161,GO:0043248	nucleus|cytosol|proteasome regulatory particle, base subcomplex|polyubiquitin modification-dependent protein binding|proteasome-mediated ubiquitin-dependent protein catabolic process|proteasome assembly	ko03050	Proteasome
CSS0032074	1	1.11234	2.64762e-05	0.00035989	Thaumatin-like protein	--	GO:0006952,GO:0009617,GO:0009723	defense response|response to bacterium|response to ethylene	--	--
CSS0019002	2	2.68106	4.38068e-50	5.0189e-48	flavanone 3-hydroxylase	--	GO:0009813,GO:0031418,GO:0045486,GO:0046872	flavonoid biosynthetic process|L-ascorbic acid binding|naringenin 3-dioxygenase activity|metal ion binding	ko00941	Flavonoid biosynthesis
CSS0015066	2	0.979206	0.000258528	0.00297407	peptidyl-prolyl cis-trans isomerase pin1	--	GO:0003755	peptidyl-prolyl cis-trans isomerase activity	--	--
CSS0031839	2	0.905912	2.63669e-09	5.71509e-08	peptidyl-prolyl cis-trans isomerase pin1	--	GO:0003755	peptidyl-prolyl cis-trans isomerase activity	--	--
CSS0026336	2	1.46899	2.79221e-68	4.70254e-66	histone H1-like protein	--	GO:0000786,GO:0003677,GO:0005634,GO:0006334	nucleosome|DNA binding|nucleus|nucleosome assembly	--	--
CSS0001758	1	1.18826	1.5419e-78	3.09145e-76	Heterogeneous nuclear ribonucleoprotein like	--	GO:0003682,GO:0003729,GO:0005634,GO:0005737,GO:0005783,GO:0005829,GO:0007275,GO:0009617,GO:0009909,GO:0010439,GO:0010468,GO:0042742,GO:0043565,GO:0045087,GO:0045824,GO:0045893,GO:0050832,GO:0071395,GO:1902464,GO:1905933	chromatin binding|mRNA binding|nucleus|cytoplasm|endoplasmic reticulum|cytosol|multicellular organism development|response to bacterium|regulation of flower development|regulation of glucosinolate biosynthetic process|regulation of gene expression|defense response to bacterium|sequence-specific DNA binding|innate immune response|negative regulation of innate immune response|positive regulation of…	--	--
CSS0032573	2	2.29109	2.17388e-31	1.47233e-29	histone H1-like protein	--	GO:0000786,GO:0003677,GO:0005634,GO:0006334	nucleosome|DNA binding|nucleus|nucleosome assembly	--	--
CSS0027341	2	0.959194	3.21958e-20	1.37739e-18	V-type proton ATPase 16 kDa proteolipid subunit	--	GO:0005774,GO:0015078,GO:0015991,GO:0016021,GO:0033179	vacuolar membrane|proton transmembrane transporter activity|ATP hydrolysis coupled proton transport|integral component of membrane|proton-transporting V-type ATPase, V0 domain	ko00190,ko04145	Oxidative phosphorylation|Phagosome
CSS0017089	2	0.792025	7.84429e-06	0.00011528	Serine protease	--	GO:0005576,GO:0005773,GO:0006508,GO:0008236,GO:0008239,GO:0009561	extracellular region|vacuole|proteolysis|serine-type peptidase activity|dipeptidyl-peptidase activity|megagametogenesis	--	--
CSS0044957	1	0.921059	0.000263224	0.00302465	Zinc finger CCCH domain-containing protein	--	GO:0003677,GO:0046872	DNA binding|metal ion binding	--	--
CSS0016008	1	1.00166	7.4364e-08	1.38541e-06	Cytochrome P450 84A1 like	--	GO:0004497,GO:0005506,GO:0005783,GO:0009699,GO:0009809,GO:0010224,GO:0016020,GO:0016021,GO:0016709,GO:0020037	monooxygenase activity|iron ion binding|endoplasmic reticulum|phenylpropanoid biosynthetic process|lignin biosynthetic process|response to UV-B|membrane|integral component of membrane|oxidoreductase activity, acting on paired donors, with incorporation or reduction of molecular oxygen, NAD(P)H as one donor, and incorporation of one atom of oxygen|heme binding	ko00940	Phenylpropanoid biosynthesis
CSS0027383	2	0.883079	9.56817e-18	3.63756e-16	Monothiol glutaredoxin-S6 like	--	GO:0004362,GO:0005737,GO:0009055,GO:0015035,GO:0034599,GO:0045454,GO:0046872,GO:0051537	glutathione-disulfide reductase activity|cytoplasm|electron transfer activity|protein disulfide oxidoreductase activity|cellular response to oxidative stress|cell redox homeostasis|metal ion binding|2 iron, 2 sulfur cluster binding	--	--
CSS0041774	2	0.872795	0.000169596	0.00201267	sugar transporter ERD6-like 6	--	GO:0005351,GO:0005355,GO:0005773,GO:0005774,GO:0005887,GO:0008645	carbohydrate:proton symporter activity|glucose transmembrane transporter activity|vacuole|vacuolar membrane|integral component of plasma membrane|hexose transmembrane transport	--	--
CSS0046028	2	0.971858	3.95011e-10	9.2227e-09	protein AE7-like 1	--	GO:0016226	iron-sulfur cluster assembly	--	--
CSS0031459	1	0.995364	2.06431e-09	4.53081e-08	OSIGBa0134J07.9	--	--	--	--	--
CSS0014392	2	0.887093	0.000859827	0.00888764	Malate dehydrogenase, glyoxysomal like	--	GO:0006097,GO:0006099,GO:0006108,GO:0009514,GO:0030060	glyoxylate cycle|tricarboxylic acid cycle|malate metabolic process|glyoxysome|L-malate dehydrogenase activity	ko00020,ko00270,ko00620,ko00630,ko00710	Citrate cycle (TCA cycle)|Cysteine and methionine metabolism|Pyruvate metabolism|Glyoxylate and dicarboxylate metabolism|Carbon fixation in photosynthetic organisms
CSS0030330	1	0.95985	4.2995e-06	6.54314e-05	Phosphoenolpyruvate carboxykinase	--	GO:0004612,GO:0005524,GO:0005634,GO:0005730,GO:0005829,GO:0006094,GO:0009817,GO:0016020,GO:0016036,GO:0046686	phosphoenolpyruvate carboxykinase (ATP) activity|ATP binding|nucleus|nucleolus|cytosol|gluconeogenesis|defense response to fungus, incompatible interaction|membrane|cellular response to phosphate starvation|response to cadmium ion	ko00010,ko00020,ko00620,ko00710	Glycolysis / Gluconeogenesis|Citrate cycle (TCA cycle)|Pyruvate metabolism|Carbon fixation in photosynthetic organisms
CSS0047057	2	0.627417	4.64533e-53	5.73852e-51	Cytochrome c oxidase subunit 6a like	--	GO:0004129,GO:0005739,GO:0005751,GO:0006123,GO:0009060,GO:0030234	cytochrome-c oxidase activity|mitochondrion|mitochondrial respiratory chain complex IV|mitochondrial electron transport, cytochrome c to oxygen|aerobic respiration|enzyme regulator activity	ko00190	Oxidative phosphorylation
CSS0048277	2	3.23931	4.02537e-09	8.58877e-08	Phytosulfokine-beta like	--	GO:0005576,GO:0007275,GO:0008083,GO:0008283,GO:0030154	extracellular region|multicellular organism development|growth factor activity|cell proliferation|cell differentiation	--	--
CSS0013283	2	0.893471	4.21199e-07	7.22618e-06	Protein gar2 like	--	--	--	--	--
CSS0022661	2	0.808184	2.52896e-08	4.98735e-07	NADH dehydrogenase	--	GO:0005739,GO:0005747,GO:0006970,GO:0008137,GO:0009631,GO:0022900,GO:0050897	mitochondrion|mitochondrial respiratory chain complex I|response to osmotic stress|NADH dehydrogenase (ubiquinone) activity|cold acclimation|electron transport chain|cobalt ion binding	ko00190	Oxidative phosphorylation
CSS0012425	2	1.0541	1.41042e-15	4.73813e-14	ADP-ribosylation factor-like protein 8a	--	GO:0005525,GO:0005765,GO:0005773,GO:0005774,GO:0005819,GO:0007049,GO:0007059,GO:0009506,GO:0031902,GO:0051301	GTP binding|lysosomal membrane|vacuole|vacuolar membrane|spindle|cell cycle|chromosome segregation|plasmodesma|late endosome membrane|cell division	--	--
CSS0048650	2	0.725921	8.51056e-88	2.0476e-85	ADP-ribosylation factor-like protein 8a	--	GO:0005525,GO:0005765,GO:0005773,GO:0005774,GO:0005819,GO:0007049,GO:0007059,GO:0009506,GO:0031902,GO:0051301	GTP binding|lysosomal membrane|vacuole|vacuolar membrane|spindle|cell cycle|chromosome segregation|plasmodesma|late endosome membrane|cell division	--	--
CSS0036973	1	0.928986	5.08149e-08	9.63748e-07	Peptidyl-prolyl cis-trans isomerase	--	GO:0000209,GO:0000413,GO:0003755,GO:0005634,GO:0006457,GO:0034450	protein polyubiquitination|protein peptidyl-prolyl isomerization|peptidyl-prolyl cis-trans isomerase activity|nucleus|protein folding|ubiquitin-ubiquitin ligase activity	ko04120	Ubiquitin mediated proteolysis
CSS0002661	2	1.11366	2.97815e-14	9.31709e-13	PREDICTED: uncharacterized protein LOC100262963	--	--	--	--	--
CSS0046371	2	1.02245	2.49106e-49	2.8094e-47	Peroxidase	--	GO:0004601,GO:0005576,GO:0006979,GO:0009651,GO:0020037,GO:0042744,GO:0046872	peroxidase activity|extracellular region|response to oxidative stress|response to salt stress|heme binding|hydrogen peroxide catabolic process|metal ion binding	ko00940	Phenylpropanoid biosynthesis
CSS0003765	2	0.991301	0.000470758	0.00517291	Esterase	--	GO:0005634,GO:0005737,GO:0016787,GO:0036377,GO:0080167	nucleus|cytoplasm|hydrolase activity|arbuscular mycorrhizal association|response to karrikin	--	--
CSS0044154	2	0.925373	3.86421e-14	1.19558e-12	DNA damage-binding protein	--	--	--	--	--
CSS0047132	1	1.05195	0.000114178	0.00139885	Receptor-like protein kinase precursor	--	--	--	--	--
CSS0046754	1	1.04899	1.98424e-16	7.03042e-15	PI-PLC X domain-containing protein	--	GO:0005886,GO:0006629,GO:0008081,GO:0046658	plasma membrane|lipid metabolic process|phosphoric diester hydrolase activity|anchored component of plasma membrane	--	--
CSS0049924	1	0.96421	5.80165e-09	1.22035e-07	PREDICTED: CLK4-associating serine/arginine rich protein isoform X3	--	--	--	--	--
CSS0046781	2	0.827881	6.53426e-28	3.82111e-26	PREDICTED: probable calcium-binding protein CML20	--	GO:0005509	calcium ion binding	ko04626	Plant-pathogen interaction
CSS0026680	2	0.941041	2.56014e-06	4.02086e-05	Methionine aminopeptidase	--	GO:0005739,GO:0009507,GO:0009737,GO:0031365,GO:0046872,GO:0070006,GO:0070084	mitochondrion|chloroplast|response to abscisic acid|N-terminal protein amino acid modification|metal ion binding|metalloaminopeptidase activity|protein initiator methionine removal	--	--
CSS0050435	1	1.62909	4.3002e-215	3.29193e-212	Cytochrome P450 81E8 like	--	GO:0004497,GO:0005506,GO:0016021,GO:0016705,GO:0020037	monooxygenase activity|iron ion binding|integral component of membrane|oxidoreductase activity, acting on paired donors, with incorporation or reduction of molecular oxygen|heme binding	--	--
CSS0009817	2	0.895031	7.00801e-05	0.000891889	PREDICTED: upstream activation factor subunit spp27-like	--	GO:0005730,GO:0005737	nucleolus|cytoplasm	--	--
CSS0020459	2	0.883208	1.75514e-07	3.15021e-06	sucrose non-fermenting-1-related protein kinase 2.6	--	GO:0004674,GO:0005524,GO:0005634,GO:0005737,GO:0005829,GO:0006468,GO:0009738,GO:0035556	protein serine/threonine kinase activity|ATP binding|nucleus|cytoplasm|cytosol|protein phosphorylation|abscisic acid-activated signaling pathway|intracellular signal transduction	ko04016,ko04075	MAPK signaling pathway - plant|Plant hormone signal transduction
CSS0034564	2	1.16011	4.46901e-11	1.1156e-09	Salicylic acid-binding protein like	--	GO:0009862,GO:0016298,GO:0080031	systemic acquired resistance, salicylic acid mediated signaling pathway|lipase activity|methyl salicylate esterase activity	--	--
CSS0045740	2	1.33938	1.48679e-52	1.80577e-50	oxygen-evolving enhancer protein	--	GO:0009535,GO:0009654,GO:0010207,GO:0010242,GO:0042549	chloroplast thylakoid membrane|photosystem II oxygen evolving complex|photosystem II assembly|oxygen evolving activity|photosystem II stabilization	ko00195	Photosynthesis
CSS0048854	1	0.919538	0.000425023	0.00470721	Calcium uniporter protein	--	GO:0005262,GO:0005743,GO:0015292,GO:0016021,GO:0051560	calcium channel activity|mitochondrial inner membrane|uniporter activity|integral component of membrane|mitochondrial calcium ion homeostasis	--	--
CSS0000333	2	1.41297	8.8751e-09	1.82356e-07	homeobox-leucine zipper protein ATHB-40	HB-other	GO:0003700,GO:0005634,GO:0009733,GO:0043565	DNA-binding transcription factor activity|nucleus|response to auxin|sequence-specific DNA binding	--	--
CSS0017924	2	1.19544	5.59105e-79	1.12545e-76	Polyol transporter like	--	GO:0005351,GO:0005355,GO:0005887,GO:0008645	carbohydrate:proton symporter activity|glucose transmembrane transporter activity|integral component of plasma membrane|hexose transmembrane transport	--	--
CSS0014655	1	1.02324	9.09255e-09	1.86673e-07	hypothetical protein 111O18.14	--	GO:0005634,GO:0042393	nucleus|histone binding	--	--
CSS0001088	1	0.975891	3.77815e-07	6.51949e-06	uncharacterized protein LOC111316602 isoform X1	--	--	--	--	--
CSS0032685	2	1.04687	2.65021e-12	7.28519e-11	unnamed protein product	--	GO:0006869,GO:0008289	lipid transport|lipid binding	--	--
CSS0041959	2	0.822912	1.01706e-36	8.31503e-35	40S ribosomal protein	--	GO:0003735,GO:0005840,GO:0006412	structural constituent of ribosome|ribosome|translation	ko03010	Ribosome
CSS0015221	2	1.33972	5.99256e-73	1.10906e-70	LOB domain-containing protein	LOB	GO:0006355	regulation of transcription, DNA-templated	--	--
CSS0037316	2	0.881762	5.5349e-08	1.04738e-06	ubiquitin receptor RAD23c-like	--	GO:0000502,GO:0003684,GO:0005634,GO:0005654,GO:0005737,GO:0005829,GO:0006289,GO:0031593,GO:0043130,GO:0043161,GO:0070628	proteasome complex|damaged DNA binding|nucleus|nucleoplasm|cytoplasm|cytosol|nucleotide-excision repair|polyubiquitin modification-dependent protein binding|ubiquitin binding|proteasome-mediated ubiquitin-dependent protein catabolic process|proteasome binding	ko03420,ko04141	Nucleotide excision repair|Protein processing in endoplasmic reticulum
CSS0032859	2	0.95364	3.31447e-08	6.41869e-07	PREDICTED: 14-3-3-like protein A	--	GO:0019904	protein domain specific binding	--	--
CSS0014184	2	0.642625	1.61856e-15	5.41217e-14	PREDICTED: 14-3-3-like protein A	--	GO:0019904	protein domain specific binding	--	--
CSS0046451	2	0.924191	4.1118e-15	1.35165e-13	Ultraviolet-B receptor like	--	GO:0000785,GO:0003682,GO:0005085,GO:0005634,GO:0005829,GO:0009411,GO:0009649,GO:0009881,GO:0010224,GO:0018298,GO:0042802,GO:0042803	chromatin|chromatin binding|guanyl-nucleotide exchange factor activity|nucleus|cytosol|response to UV|entrainment of circadian clock|photoreceptor activity|response to UV-B|protein-chromophore linkage|identical protein binding|protein homodimerization activity	--	--
CSS0043394	2	1.04704	0.000377769	0.00422181	GDT1-like protein	--	GO:0016021	integral component of membrane	--	--
CSS0006857	2	1.52358	3.04418e-07	5.31103e-06	allene oxide cyclase	--	GO:0006636,GO:0007623,GO:0009507,GO:0009611,GO:0009625,GO:0009637,GO:0009646,GO:0009651,GO:0009695,GO:0009723,GO:0009734,GO:0009737,GO:0009751,GO:0009864,GO:0009908,GO:0010038,GO:0010114,GO:0010218,GO:0033274,GO:0042542,GO:0046423,GO:0048573,GO:0050832,GO:0080186,GO:1900367	unsaturated fatty acid biosynthetic process|circadian rhythm|chloroplast|response to wounding|response to insect|response to blue light|response to absence of light|response to salt stress|jasmonic acid biosynthetic process|response to ethylene|auxin-activated signaling pathway|response to abscisic acid|response to salicylic acid|induced systemic resistance, jasmonic acid mediated signaling pathw…	ko00592	alpha-Linolenic acid metabolism
CSS0014522	2	0.930564	2.53035e-07	4.45923e-06	Cyclin-B1-2 like	--	GO:0000079,GO:0000278,GO:0000307,GO:0005634,GO:0005737,GO:0006468,GO:0007088,GO:0008284,GO:0016538,GO:0019901,GO:0045787,GO:0051301	regulation of cyclin-dependent protein serine/threonine kinase activity|mitotic cell cycle|cyclin-dependent protein kinase holoenzyme complex|nucleus|cytoplasm|protein phosphorylation|regulation of mitotic nuclear division|positive regulation of cell proliferation|cyclin-dependent protein serine/threonine kinase regulator activity|protein kinase binding|positive regulation of cell cycle|cell divi…	ko03050	Proteasome
CSS0047139	1	0.979836	2.41357e-05	0.000330656	Ultraviolet-B receptor like	--	GO:0000785,GO:0003682,GO:0005085,GO:0005634,GO:0005829,GO:0009411,GO:0009649,GO:0009881,GO:0010224,GO:0018298,GO:0042802,GO:0042803	chromatin|chromatin binding|guanyl-nucleotide exchange factor activity|nucleus|cytosol|response to UV|entrainment of circadian clock|photoreceptor activity|response to UV-B|protein-chromophore linkage|identical protein binding|protein homodimerization activity	--	--
CSS0032789	2	2.48985	5.40997e-29	3.30518e-27	Protein ORANGE-ORANGE like	--	--	--	--	--
CSS0041097	2	0.664446	0	0	NADH dehydrogenase	--	--	--	--	--
CSS0023341	1	0.977041	3.81665e-08	7.34614e-07	Solute carrier family 25 member like	--	GO:0000095,GO:0005743,GO:0006826,GO:0009507,GO:0009536,GO:0009706,GO:0009941,GO:0010039,GO:0016021	S-adenosyl-L-methionine transmembrane transporter activity|mitochondrial inner membrane|iron ion transport|chloroplast|plastid|chloroplast inner membrane|chloroplast envelope|response to iron ion|integral component of membrane	--	--
CSS0031817	1	1.14756	7.51428e-08	1.39838e-06	Receptor-like protein kinase	--	--	--	--	--
CSS0041181	2	0.910248	0.000271664	0.00311738	Vesicle transport v-SNARE like	--	GO:0000149,GO:0005484,GO:0005789,GO:0005794,GO:0005829,GO:0006623,GO:0006888,GO:0006891,GO:0006896,GO:0012507,GO:0016021,GO:0031201,GO:0031902,GO:0042147,GO:0048280	SNARE binding|SNAP receptor activity|endoplasmic reticulum membrane|Golgi apparatus|cytosol|protein targeting to vacuole|ER to Golgi vesicle-mediated transport|intra-Golgi vesicle-mediated transport|Golgi to vacuole transport|ER to Golgi transport vesicle membrane|integral component of membrane|SNARE complex|late endosome membrane|retrograde transport, endosome to Golgi|vesicle fusion with Golgi …	ko04130	SNARE interactions in vesicular transport
CSS0001636	2	0.741555	0.00022129	0.0025685	Cystathionine gamma-synthase	--	GO:0001887,GO:0003962,GO:0009086,GO:0009507,GO:0009570,GO:0030170	selenium compound metabolic process|cystathionine gamma-synthase activity|methionine biosynthetic process|chloroplast|chloroplast stroma|pyridoxal phosphate binding	ko00270,ko00450,ko00920	Cysteine and methionine metabolism|Selenocompound metabolism|Sulfur metabolism
CSS0028300	2	0.900704	0.000400683	0.00445718	PREDICTED: uncharacterized protein At5g39570-like	--	GO:0003729,GO:0005634,GO:0005829,GO:0070300	mRNA binding|nucleus|cytosol|phosphatidic acid binding	--	--
CSS0042401	1	0.890409	5.04877e-06	7.61461e-05	KH domain-containing protein	--	GO:0003723,GO:0005634	RNA binding|nucleus	--	--
CSS0001219	2	2.05303	2.96492e-81	6.21587e-79	Mini zinc finger protein	zf-HD	GO:0003677,GO:0005634,GO:0005737,GO:0010582,GO:0035670,GO:0042803,GO:0046872	DNA binding|nucleus|cytoplasm|floral meristem determinacy|plant-type ovary development|protein homodimerization activity|metal ion binding	--	--
CSS0022726	1	1.04064	8.68636e-56	1.13699e-53	lysine histidine transporter 1	--	GO:0003333,GO:0005886,GO:0015171,GO:0015293,GO:0016021,GO:0043090,GO:0080167	amino acid transmembrane transport|plasma membrane|amino acid transmembrane transporter activity|symporter activity|integral component of membrane|amino acid import|response to karrikin	--	--
CSS0020557	2	0.693155	3.54949e-24	1.78624e-22	54S ribosomal protein L37, mitochondrial-like	--	--	--	--	--
CSS0019474	2	0.868671	1.39075e-10	3.34289e-09	Plant UBX domain-containing protein	--	GO:0005737,GO:0032984,GO:0035265,GO:0051117	cytoplasm|protein-containing complex disassembly|organ growth|ATPase binding	--	--
CSS0011940	1	1.08706	6.50966e-13	1.87088e-11	Glycosyltransferase family 92 protein like	--	GO:0016021,GO:0016757	integral component of membrane|transferase activity, transferring glycosyl groups	--	--
CSS0026983	1	0.98229	2.49901e-05	0.00034125	Peptidyl serine alpha-galactosyltransferase	--	GO:0005789,GO:0016021,GO:0016757	endoplasmic reticulum membrane|integral component of membrane|transferase activity, transferring glycosyl groups	ko00514	Other types of O-glycan biosynthesis
CSS0005841	1	1.01592	0.000664051	0.00702937	Peptidyl serine alpha-galactosyltransferase	--	GO:0005789,GO:0016021,GO:0016757	endoplasmic reticulum membrane|integral component of membrane|transferase activity, transferring glycosyl groups	ko00514	Other types of O-glycan biosynthesis
CSS0016509	2	0.97596	2.40474e-06	3.7874e-05	Succinate dehydrogenase	--	GO:0000104,GO:0005739,GO:0005749,GO:0006099,GO:0006121,GO:0008177,GO:0008270,GO:0009055,GO:0009060,GO:0022904,GO:0045273,GO:0045281,GO:0051537,GO:0051538,GO:0051539	succinate dehydrogenase activity|mitochondrion|mitochondrial respiratory chain complex II, succinate dehydrogenase complex (ubiquinone)|tricarboxylic acid cycle|mitochondrial electron transport, succinate to ubiquinone|succinate dehydrogenase (ubiquinone) activity|zinc ion binding|electron transfer activity|aerobic respiration|respiratory electron transport chain|respiratory chain complex II|succ…	ko00020,ko00190	Citrate cycle (TCA cycle)|Oxidative phosphorylation
CSS0018901	2	0.882889	7.77752e-08	1.44417e-06	ras-related protein RABB1b	--	GO:0003924,GO:0005525,GO:0005773,GO:0005794,GO:0005886,GO:0006886,GO:0006888,GO:0016020,GO:0032482	GTPase activity|GTP binding|vacuole|Golgi apparatus|plasma membrane|intracellular protein transport|ER to Golgi vesicle-mediated transport|membrane|Rab protein signal transduction	--	--
CSS0028424	1	1.09837	7.17137e-16	2.46485e-14	PREDICTED: uncharacterized protein LOC104881693	--	--	--	--	--
CSS0019571	2	0.86838	1.47235e-07	2.6625e-06	hypothetical protein CEY00_Acc05725	--	GO:0005524,GO:0005634,GO:0005849,GO:0006378,GO:0006388,GO:0006397,GO:0009908,GO:0010228,GO:0048827	ATP binding|nucleus|mRNA cleavage factor complex|mRNA polyadenylation|tRNA splicing, via endonucleolytic cleavage and ligation|mRNA processing|flower development|vegetative to reproductive phase transition of meristem|phyllome development	ko03015	mRNA surveillance pathway
CSS0011492	1	1.48582	8.91374e-10	2.01416e-08	AAA-ATPase	--	GO:0005524,GO:0005739,GO:0005783,GO:0009409,GO:0009414,GO:0009651,GO:0009737,GO:0010154,GO:0010431,GO:0016021,GO:0016887,GO:0031966	ATP binding|mitochondrion|endoplasmic reticulum|response to cold|response to water deprivation|response to salt stress|response to abscisic acid|fruit development|seed maturation|integral component of membrane|ATPase activity|mitochondrial membrane	--	--
CSS0006868	2	0.49223	1.09044e-173	6.19038e-171	b12d-like protein	--	--	--	--	--
CSS0042726	2	0.711108	4.61123e-70	8.03387e-68	formate dehydrogenase, mitochondrial	--	GO:0005739,GO:0008863,GO:0016616,GO:0042183,GO:0051287	mitochondrion|formate dehydrogenase (NAD+) activity|oxidoreductase activity, acting on the CH-OH group of donors, NAD or NADP as acceptor|formate catabolic process|NAD binding	ko00630	Glyoxylate and dicarboxylate metabolism
CSS0026879	2	0.93379	1.73824e-36	1.41424e-34	50S ribosomal protein L27, chloroplastic	--	GO:0003735,GO:0005840,GO:0006412,GO:0009507	structural constituent of ribosome|ribosome|translation|chloroplast	ko03010	Ribosome
CSS0033174	2	0.838059	1.23699e-06	2.02001e-05	putative proteins of PilT N-term/Vapc superfamily	--	GO:0005730,GO:0006364,GO:0032040,GO:0070181	nucleolus|rRNA processing|small-subunit processome|small ribosomal subunit rRNA binding	--	--
CSS0007606	2	0.885269	4.42157e-05	0.000581165	Protein COFACTOR ASSEMBLY OF COMPLEX C SUBUNIT B like	--	GO:0009507,GO:0009535,GO:0010190,GO:0016021	chloroplast|chloroplast thylakoid membrane|cytochrome b6f complex assembly|integral component of membrane	--	--
CSS0031301	2	1.01362	1.067e-07	1.95398e-06	Short-chain dehydrogenase reductase	--	GO:0016491	oxidoreductase activity	--	--
CSS0041530	2	0.903637	6.18996e-05	0.000794987	uncharacterized protein LOC105647254 isoform X1	--	--	--	--	--
CSS0039052	2	0.7446	3.34925e-24	1.68883e-22	DNA repair RAD52-like protein	--	GO:0000724,GO:0003677,GO:0009507	double-strand break repair via homologous recombination|DNA binding|chloroplast	--	--
CSS0041196	2	0.900491	1.45492e-08	2.92868e-07	uncharacterized protein LOC111283021 isoform X1	--	--	--	--	--
CSS0031140	2	0.923963	4.79926e-10	1.11384e-08	50S ribosomal protein	--	--	--	ko03010	Ribosome
CSS0000697	1	0.913855	2.26161e-11	5.77695e-10	RNA polymerase II C-terminal domain phosphatase-like	--	GO:0003723,GO:0005634,GO:0008022,GO:0008420,GO:0009651,GO:0009788,GO:0046872,GO:0070940	RNA binding|nucleus|protein C-terminus binding|RNA polymerase II CTD heptapeptide repeat phosphatase activity|response to salt stress|negative regulation of abscisic acid-activated signaling pathway|metal ion binding|dephosphorylation of RNA polymerase II C-terminal domain	--	--
CSS0039203	2	0.782132	7.93348e-11	1.94205e-09	unnamed protein product, partial	--	GO:0016123	xanthophyll biosynthetic process	--	--
CSS0031320	1	0.921562	5.24777e-21	2.30962e-19	BAR domain protein	--	GO:0005886	plasma membrane	--	--
CSS0027356	2	0.904851	0.000555144	0.00599202	Delta(3,5)-Delta(2,4)-dienoyl-CoA isomerase, peroxisomal like	--	GO:0005777,GO:0006635,GO:0009062,GO:0051750	peroxisome|fatty acid beta-oxidation|fatty acid catabolic process|delta3,5-delta2,4-dienoyl-CoA isomerase activity	ko04146	Peroxisome
CSS0029750	2	0.99743	0.000335605	0.00378661	cyclophilin b	--	GO:0003755,GO:0006457,GO:0009507,GO:0009533,GO:0009534,GO:0009535,GO:0009543,GO:0009579,GO:0010275,GO:0031977,GO:0043424,GO:0051082	peptidyl-prolyl cis-trans isomerase activity|protein folding|chloroplast|chloroplast stromal thylakoid|chloroplast thylakoid|chloroplast thylakoid membrane|chloroplast thylakoid lumen|thylakoid|NAD(P)H dehydrogenase complex assembly|thylakoid lumen|protein histidine kinase binding|unfolded protein binding	--	--
CSS0015277	2	0.944946	4.21647e-09	8.98133e-08	ACT domain-containing protein	--	GO:0009506	plasmodesma	--	--
CSS0016059	1	0.992607	0.00059051	0.00632243	hypothetical protein POPTR_001G059800v3	--	--	--	--	--
CSS0031114	2	0.898664	3.6671e-09	7.84089e-08	nuclear transport factor 2B-like	--	GO:0005634,GO:0005635,GO:0005737,GO:0006606,GO:0006913,GO:0044613	nucleus|nuclear envelope|cytoplasm|protein import into nucleus|nucleocytoplasmic transport|nuclear pore central transport channel	--	--
CSS0031777	2	0.91908	1.70315e-29	1.06764e-27	hypothetical protein CUMW_079890	--	GO:0005634,GO:0005635,GO:0005737,GO:0006606,GO:0006913,GO:0044613	nucleus|nuclear envelope|cytoplasm|protein import into nucleus|nucleocytoplasmic transport|nuclear pore central transport channel	--	--
CSS0025775	2	0.712821	2.88806e-12	7.91318e-11	uncharacterized protein LOC111393517	--	--	--	--	--
CSS0048035	2	0.936559	2.16749e-20	9.30438e-19	REF/SRPP-like protein	--	GO:0005773,GO:0005783,GO:0005811,GO:0009555,GO:0034389,GO:0045927,GO:0080186,GO:1902584	vacuole|endoplasmic reticulum|lipid droplet|pollen development|lipid droplet organization|positive regulation of growth|developmental vegetative growth|positive regulation of response to water deprivation	--	--
CSS0043159	2	0.801188	6.96145e-18	2.66259e-16	60S ribosomal protein like, partial	--	GO:0002181,GO:0003735,GO:0005730,GO:0005773,GO:0009506,GO:0016020,GO:0022625,GO:0022626,GO:0042788	cytoplasmic translation|structural constituent of ribosome|nucleolus|vacuole|plasmodesma|membrane|cytosolic large ribosomal subunit|cytosolic ribosome|polysomal ribosome	ko03010	Ribosome
CSS0027762	2	0.875297	3.76119e-07	6.49246e-06	Proteasome subunit beta type-5-B like	--	GO:0004298,GO:0005634,GO:0005737,GO:0019774,GO:0051603	threonine-type endopeptidase activity|nucleus|cytoplasm|proteasome core complex, beta-subunit complex|proteolysis involved in cellular protein catabolic process	ko03050	Proteasome
CSS0010322	2	0.950451	0.000583704	0.00626654	Urease	--	GO:0006807,GO:0009039,GO:0016151,GO:0043419	nitrogen compound metabolic process|urease activity|nickel cation binding|urea catabolic process	ko00220,ko00230	Arginine biosynthesis|Purine metabolism
CSS0010664	1	0.669182	1.10958e-13	3.34497e-12	Cyclin-dependent kinase	--	GO:0004693,GO:0005524,GO:0008353	cyclin-dependent protein serine/threonine kinase activity|ATP binding|RNA polymerase II CTD heptapeptide repeat kinase activity	--	--
CSS0029931	2	4.62775	3.53172e-25	1.85489e-23	HSP27.4	--	GO:0009507	chloroplast	ko04141	Protein processing in endoplasmic reticulum
CSS0012497	2	1.1144	5.19698e-09	1.10095e-07	PREDICTED: photosystem II core complex proteins psbY, chloroplastic	--	GO:0009523,GO:0009535,GO:0015979,GO:0016021,GO:0030145	photosystem II|chloroplast thylakoid membrane|photosynthesis|integral component of membrane|manganese ion binding	ko00195	Photosynthesis
CSS0034236	2	0.94182	7.53121e-08	1.40101e-06	T-complex protein 1 subunit epsilon like	--	GO:0005524,GO:0005829,GO:0005832,GO:0005886,GO:0006457,GO:0009506,GO:0051082	ATP binding|cytosol|chaperonin-containing T-complex|plasma membrane|protein folding|plasmodesma|unfolded protein binding	--	--
CSS0025978	2	2.53373	0.000840942	0.00870311	hypothetical protein POPTR_010G050300v3	--	GO:0010088,GO:0042803,GO:0043621	phloem development|protein homodimerization activity|protein self-association	--	--
CSS0009419	2	0.855969	3.52792e-42	3.37591e-40	Alpha-galactosidase	--	GO:0004557,GO:0005576,GO:0005737,GO:0005788,GO:0005995,GO:0009311,GO:0016139,GO:0046477,GO:0052692	alpha-galactosidase activity|extracellular region|cytoplasm|endoplasmic reticulum lumen|melibiose catabolic process|oligosaccharide metabolic process|glycoside catabolic process|glycosylceramide catabolic process|raffinose alpha-galactosidase activity	--	--
CSS0007583	2	0.958182	1.64057e-05	0.000230186	PREDICTED: GDSL esterase/lipase At5g14450-like	--	GO:0005576,GO:0009505,GO:0009506,GO:0016042,GO:0016788	extracellular region|plant-type cell wall|plasmodesma|lipid catabolic process|hydrolase activity, acting on ester bonds	--	--
CSS0009175	1	0.897918	1.17994e-11	3.08254e-10	Developmental and secondary metabolism regulator veA like	--	--	--	--	--
CSS0020827	2	0.971506	3.17235e-09	6.82927e-08	BTB/POZ domain-containing protein	--	GO:0016567	protein ubiquitination	--	--
CSS0032991	2	1.49262	2.7486e-62	4.13312e-60	hypothetical protein L484_027719	--	--	--	--	--
CSS0037172	1	0.932791	7.1401e-07	1.19494e-05	Suppressor protein	--	--	--	--	--
CSS0000303	2	0.92131	1.30251e-20	5.65372e-19	PREDICTED: uncharacterized protein LOC18609554	--	--	--	--	--
CSS0045519	2	0.962489	5.33004e-06	8.02444e-05	PREDICTED: 60S ribosomal protein L27a-3	--	GO:0003735,GO:0005829,GO:0006412,GO:0009506,GO:0016020,GO:0022625,GO:0022626,GO:0042788	structural constituent of ribosome|cytosol|translation|plasmodesma|membrane|cytosolic large ribosomal subunit|cytosolic ribosome|polysomal ribosome	ko03010	Ribosome
CSS0003576	1	0.928582	4.56218e-15	1.49678e-13	uncharacterized protein LOC110629484	--	--	--	--	--
CSS0018348	2	0.952199	0.000344562	0.00388161	Glutamate--glyoxylate aminotransferase	--	GO:0004021,GO:0005777,GO:0008453,GO:0009058,GO:0009507,GO:0009570,GO:0030170,GO:0042853,GO:0047958	L-alanine:2-oxoglutarate aminotransferase activity|peroxisome|alanine-glyoxylate transaminase activity|biosynthetic process|chloroplast|chloroplast stroma|pyridoxal phosphate binding|L-alanine catabolic process|glycine:2-oxoglutarate aminotransferase activity	ko00220,ko00250,ko00260,ko00630,ko00710	Arginine biosynthesis|Alanine, aspartate and glutamate metabolism|Glycine, serine and threonine metabolism|Glyoxylate and dicarboxylate metabolism|Carbon fixation in photosynthetic organisms
CSS0015476	2	0.809611	7.55561e-10	1.72036e-08	PREDICTED: AP-1 complex subunit mu-2	--	GO:0005794,GO:0005829,GO:0006886,GO:0016192,GO:0030131,GO:0030665,GO:0031901	Golgi apparatus|cytosol|intracellular protein transport|vesicle-mediated transport|clathrin adaptor complex|clathrin-coated vesicle membrane|early endosome membrane	--	--
CSS0045981	1	0.880823	0.000192375	0.00226093	Signal recognition particle receptor subunit beta like	--	GO:0003924,GO:0005047,GO:0005525,GO:0005785,GO:0006614,GO:0030176,GO:0042802,GO:0045047	GTPase activity|signal recognition particle binding|GTP binding|signal recognition particle receptor complex|SRP-dependent cotranslational protein targeting to membrane|integral component of endoplasmic reticulum membrane|identical protein binding|protein targeting to ER	ko03060	Protein export
CSS0036353	1	0.926762	0.000591465	0.00632862	unnamed protein product	--	GO:0000045,GO:0000407,GO:0005524,GO:0005737,GO:0005768,GO:0005777,GO:0006468,GO:0006897,GO:0016020,GO:0016303,GO:0030242,GO:0034271,GO:0034272,GO:0036092,GO:0046854,GO:0048015	autophagosome assembly|phagophore assembly site|ATP binding|cytoplasm|endosome|peroxisome|protein phosphorylation|endocytosis|membrane|1-phosphatidylinositol-3-kinase activity|autophagy of peroxisome|phosphatidylinositol 3-kinase complex, class III, type I|phosphatidylinositol 3-kinase complex, class III, type II|phosphatidylinositol-3-phosphate biosynthetic process|phosphatidylinositol phosphory…	ko00562,ko04070,ko04136,ko04145	Inositol phosphate metabolism|Phosphatidylinositol signaling system|Autophagy - other|Phagosome
CSS0022624	1	0.995735	0.00016825	0.00199831	17-beta-hydroxysteroid dehydrogenase type 6 like	--	--	--	--	--
CSS0004274	2	0.550417	8.85617e-22	4.03843e-20	Nucleoredoxin like	--	GO:0005829,GO:0009860,GO:0010183,GO:0045454,GO:0046686,GO:0047134,GO:0080092	cytosol|pollen tube growth|pollen tube guidance|cell redox homeostasis|response to cadmium ion|protein-disulfide reductase activity|regulation of pollen tube growth	--	--
CSS0038467	2	0.843074	5.01226e-27	2.83906e-25	probable nucleoredoxin 1	--	GO:0005829,GO:0009860,GO:0010183,GO:0045454,GO:0046686,GO:0047134,GO:0080092	cytosol|pollen tube growth|pollen tube guidance|cell redox homeostasis|response to cadmium ion|protein-disulfide reductase activity|regulation of pollen tube growth	--	--
CSS0003337	2	1.11453	8.14434e-08	1.50951e-06	Aldehyde dehydrogenase family 2 member like	--	GO:0004029,GO:0005759,GO:0043878	aldehyde dehydrogenase (NAD) activity|mitochondrial matrix|glyceraldehyde-3-phosphate dehydrogenase (NAD+) (non-phosphorylating) activity	ko00010,ko00053,ko00071,ko00280,ko00310,ko00330,ko00340,ko00380,ko00410,ko00561,ko00620,ko00903	Glycolysis / Gluconeogenesis|Ascorbate and aldarate metabolism|Fatty acid degradation|Valine, leucine and isoleucine degradation|Lysine degradation|Arginine and proline metabolism|Histidine metabolism|Tryptophan metabolism|beta-Alanine metabolism|Glycerolipid metabolism|Pyruvate metabolism|Limonene and pinene degradation
CSS0017099	2	0.91467	2.8782e-05	0.000388722	NHL repeat-containing protein	--	--	--	--	--
CSS0049008	2	1.03178	0.000107158	0.00131699	WAT1-related protein At3g28050-like	--	GO:0005886,GO:0016021,GO:0022857	plasma membrane|integral component of membrane|transmembrane transporter activity	--	--
CSS0041556	1	1.01557	0.00095659	0.00977979	Nucleolar GTP-binding protein	--	GO:0005525,GO:0005730,GO:0016020,GO:0042254	GTP binding|nucleolus|membrane|ribosome biogenesis	--	--
CSS0014364	2	0.9266	5.27158e-06	7.94353e-05	PREDICTED: uncharacterized protein LOC108984971	--	GO:0005634,GO:0005737,GO:0009846	nucleus|cytoplasm|pollen germination	--	--
CSS0032899	1	1.05469	8.15728e-75	1.55527e-72	Metalloendoproteinase	--	GO:0004222,GO:0005886,GO:0008270,GO:0031012,GO:0031225	metalloendopeptidase activity|plasma membrane|zinc ion binding|extracellular matrix|anchored component of membrane	--	--
CSS0047872	2	0.878537	0.000244557	0.00282299	Proteasome inhibitor PI31 subunit like	--	--	--	--	--
CSS0038524	1	0.97404	1.56208e-68	2.65737e-66	Phospholipid-transporting ATPase 9	--	GO:0000139,GO:0000287,GO:0004012,GO:0005524,GO:0005802,GO:0005886,GO:0016021,GO:0045332,GO:0048194	Golgi membrane|magnesium ion binding|phospholipid-translocating ATPase activity|ATP binding|trans-Golgi network|plasma membrane|integral component of membrane|phospholipid translocation|Golgi vesicle budding	--	--
CSS0041757	2	0.767389	8.42731e-06	0.00012331	Coiled-coil domain-containing protein, partial	--	GO:0005634,GO:0005684,GO:0045292,GO:0071014	nucleus|U2-type spliceosomal complex|mRNA cis splicing, via spliceosome|post-mRNA release spliceosomal complex	--	--
CSS0022168	2	0.989236	9.26472e-11	2.25265e-09	RAV transcription factor	AP2/ERF-RAV	GO:0003677,GO:0003700,GO:0005634,GO:0009741,GO:0009873,GO:0009910,GO:0045892,GO:0048366,GO:0048527	DNA binding|DNA-binding transcription factor activity|nucleus|response to brassinosteroid|ethylene-activated signaling pathway|negative regulation of flower development|negative regulation of transcription, DNA-templated|leaf development|lateral root development	--	--
CSS0003626	1	0.911525	3.43784e-14	1.0689e-12	Serine/threonine-protein kinase	--	GO:0004672,GO:0004674,GO:0005524,GO:0005634,GO:0006468,GO:0045292,GO:0070317,GO:1905746	protein kinase activity|protein serine/threonine kinase activity|ATP binding|nucleus|protein phosphorylation|mRNA cis splicing, via spliceosome|negative regulation of G0 to G1 transition|positive regulation of mRNA cis splicing, via spliceosome	--	--
CSS0050339	2	0.76462	4.85934e-07	8.28613e-06	ubiquitin receptor RAD23c-like	--	GO:0000502,GO:0003684,GO:0005634,GO:0005654,GO:0005737,GO:0005829,GO:0006289,GO:0031593,GO:0043130,GO:0043161,GO:0070628	proteasome complex|damaged DNA binding|nucleus|nucleoplasm|cytoplasm|cytosol|nucleotide-excision repair|polyubiquitin modification-dependent protein binding|ubiquitin binding|proteasome-mediated ubiquitin-dependent protein catabolic process|proteasome binding	ko03420,ko04141	Nucleotide excision repair|Protein processing in endoplasmic reticulum
CSS0041255	2	0.961483	0.000560665	0.00604387	50S ribosomal protein L15, chloroplastic	--	GO:0003735,GO:0006412,GO:0009507,GO:0015934	structural constituent of ribosome|translation|chloroplast|large ribosomal subunit	ko03010	Ribosome
CSS0017035	1	1.00997	2.45305e-05	0.000335699	UV excision repair protein	--	--	--	--	--
CSS0036608	2	1.04129	2.18184e-29	1.36601e-27	Universal stress protein A-like protein	--	GO:0005886,GO:0016208	plasma membrane|AMP binding	--	--
CSS0030862	1	0.849783	4.91137e-06	7.4251e-05	PREDICTED: UDP-galactose/UDP-glucose transporter 3-like	--	GO:0005459,GO:0005460,GO:0008643,GO:0009553,GO:0009555,GO:0015297,GO:0030173,GO:0030176,GO:0030968,GO:0072334	UDP-galactose transmembrane transporter activity|UDP-glucose transmembrane transporter activity|carbohydrate transport|embryo sac development|pollen development|antiporter activity|integral component of Golgi membrane|integral component of endoplasmic reticulum membrane|endoplasmic reticulum unfolded protein response|UDP-galactose transmembrane transport	--	--
CSS0000813	2	0.917379	2.15336e-06	3.40955e-05	60S ribosomal protein like	--	GO:0000463,GO:0003729,GO:0003735,GO:0009507,GO:0016020,GO:0022625,GO:0022626,GO:0042788	maturation of LSU-rRNA from tricistronic rRNA transcript (SSU-rRNA, 5.8S rRNA, LSU-rRNA)|mRNA binding|structural constituent of ribosome|chloroplast|membrane|cytosolic large ribosomal subunit|cytosolic ribosome|polysomal ribosome	ko03010	Ribosome
CSS0017130	1	0.951752	9.4563e-05	0.00117506	Zinc finger protein like	--	GO:0005506,GO:0005634,GO:0008270,GO:0010106,GO:0016021,GO:0016567,GO:0016874,GO:0060586,GO:0061630	iron ion binding|nucleus|zinc ion binding|cellular response to iron ion starvation|integral component of membrane|protein ubiquitination|ligase activity|multicellular organismal iron ion homeostasis|ubiquitin protein ligase activity	--	--
CSS0029888	2	1.4799	2.1564e-05	0.000297928	Non-specific lipid-transfer protein like	--	GO:0006869,GO:0008289	lipid transport|lipid binding	--	--
CSS0027890	2	0.893253	0.000177173	0.0020951	Small ubiquitin-related modifier like, partial	--	--	--	--	--
CSS0002829	2	0.941501	0.000120271	0.00146815	Protein DETOXIFICATION like	--	GO:0006855,GO:0009507,GO:0015238,GO:0015297,GO:0016021	drug transmembrane transport|chloroplast|drug transmembrane transporter activity|antiporter activity|integral component of membrane	--	--
CSS0002048	1	0.815451	5.46437e-11	1.3547e-09	ALG-2 interacting protein like	--	GO:0005737,GO:0005770,GO:0005771,GO:0005829,GO:0007033,GO:0009506,GO:0015031,GO:0036257,GO:0043130,GO:0043621	cytoplasm|late endosome|multivesicular body|cytosol|vacuole organization|plasmodesma|protein transport|multivesicular body organization|ubiquitin binding|protein self-association	ko04144	Endocytosis
CSS0031981	1	0.974188	0.000386742	0.0043116	WRKY domain-containing protein	WRKY	GO:0002237,GO:0003700,GO:0005634,GO:0009611,GO:0009751,GO:0010200,GO:0031347,GO:0042742,GO:0043565,GO:0044212,GO:0045892,GO:0050832	response to molecule of bacterial origin|DNA-binding transcription factor activity|nucleus|response to wounding|response to salicylic acid|response to chitin|regulation of defense response|defense response to bacterium|sequence-specific DNA binding|transcription regulatory region DNA binding|negative regulation of transcription, DNA-templated|defense response to fungus	--	--
CSS0001122	2	0.999083	7.21505e-11	1.77478e-09	eukaryotic translation initiation factor 5A-2-like	--	GO:0003743,GO:0003746,GO:0006452,GO:0043022,GO:0045901,GO:0045905	translation initiation factor activity|translation elongation factor activity|translational frameshifting|ribosome binding|positive regulation of translational elongation|positive regulation of translational termination	--	--
CSS0023470	2	0.784325	3.15933e-39	2.78578e-37	eukaryotic translation initiation factor 5A-2-like	--	GO:0003743,GO:0003746,GO:0006452,GO:0043022,GO:0045901,GO:0045905	translation initiation factor activity|translation elongation factor activity|translational frameshifting|ribosome binding|positive regulation of translational elongation|positive regulation of translational termination	--	--
CSS0018194	2	0.954904	8.54972e-06	0.000124956	Chorismate mutase	--	GO:0004106,GO:0005829,GO:0009073,GO:0046417	chorismate mutase activity|cytosol|aromatic amino acid family biosynthetic process|chorismate metabolic process	ko00400	Phenylalanine, tyrosine and tryptophan biosynthesis
CSS0007870	2	0.977609	4.83395e-07	8.24562e-06	NADH dehydrogenase	--	GO:0005739,GO:0005747,GO:0055114	mitochondrion|mitochondrial respiratory chain complex I|oxidation-reduction process	--	--
CSS0027271	2	0.802593	2.74078e-29	1.7012e-27	Protein like	--	GO:0004722,GO:0005886,GO:0046872	protein serine/threonine phosphatase activity|plasma membrane|metal ion binding	--	--
CSS0046604	2	0.821281	2.84501e-21	1.26759e-19	Chaperone protein like	--	--	--	--	--
CSS0024440	1	0.954225	3.63067e-05	0.00048299	ATP-dependent RNA helicase-like protein	--	GO:0003723,GO:0004386,GO:0005524	RNA binding|helicase activity|ATP binding	--	--
CSS0019127	2	0.782675	3.92783e-23	1.9009e-21	bZIP transcription factor family protein 4	bZIP	GO:0003677,GO:0003700,GO:0005634,GO:0042803,GO:0046982,GO:0071333	DNA binding|DNA-binding transcription factor activity|nucleus|protein homodimerization activity|protein heterodimerization activity|cellular response to glucose stimulus	--	--
CSS0039275	1	0.917439	2.58815e-13	7.62929e-12	Beta-lactamase/transpeptidase-like protein	--	GO:0005215,GO:0005524,GO:0006979,GO:0007623,GO:0009507,GO:0009644,GO:0009941,GO:0010150,GO:0016021,GO:0016301,GO:0031969,GO:0034599,GO:0042542,GO:0046467,GO:0046686,GO:0055072,GO:1901031,GO:1990641	transporter activity|ATP binding|response to oxidative stress|circadian rhythm|chloroplast|response to high light intensity|chloroplast envelope|leaf senescence|integral component of membrane|kinase activity|chloroplast membrane|cellular response to oxidative stress|response to hydrogen peroxide|membrane lipid biosynthetic process|response to cadmium ion|iron ion homeostasis|regulation of respons…	--	--
CSS0007474	1	1.04007	1.44137e-05	0.000204278	Polyadenylate-binding protein	--	GO:0003729	mRNA binding	--	--
CSS0021852	2	0.929863	1.03574e-08	2.11011e-07	Ran-binding protein 1 c like	--	GO:0000060,GO:0005634,GO:0005643,GO:0005737,GO:0005813,GO:0008536,GO:0043547,GO:0051028	protein import into nucleus, translocation|nucleus|nuclear pore|cytoplasm|centrosome|Ran GTPase binding|positive regulation of GTPase activity|mRNA transport	--	--
CSS0046063	1	0.771678	5.70432e-09	1.20208e-07	NDR1/HIN1-like protein 1	--	GO:0009506,GO:0016021,GO:0046658,GO:0051607	plasmodesma|integral component of membrane|anchored component of plasma membrane|defense response to virus	--	--
CSS0000540	1	1.15243	5.59567e-14	1.70519e-12	HVA22-like protein	--	--	--	--	--
CSS0006733	1	0.984385	4.07474e-06	6.22735e-05	Ferrochelatase-2 like	--	GO:0004325,GO:0006783,GO:0009507	ferrochelatase activity|heme biosynthetic process|chloroplast	ko00860	Porphyrin and chlorophyll metabolism
CSS0046399	2	0.846639	2.88915e-09	6.24622e-08	NADH dehydrogenase	--	GO:0005739,GO:0005747,GO:0008137,GO:0008270,GO:0009060,GO:0015990,GO:0032981,GO:0048038,GO:0051539	mitochondrion|mitochondrial respiratory chain complex I|NADH dehydrogenase (ubiquinone) activity|zinc ion binding|aerobic respiration|electron transport coupled proton transport|mitochondrial respiratory chain complex I assembly|quinone binding|4 iron, 4 sulfur cluster binding	ko00190	Oxidative phosphorylation
CSS0005095	2	0.921362	6.28979e-06	9.40212e-05	Small nuclear ribonucleoprotein like	--	GO:0000387,GO:0000398,GO:0003729,GO:0005682,GO:0005685,GO:0005686,GO:0005687,GO:0005689,GO:0005829,GO:0034719,GO:0043186,GO:0071004,GO:0071013	spliceosomal snRNP assembly|mRNA splicing, via spliceosome|mRNA binding|U5 snRNP|U1 snRNP|U2 snRNP|U4 snRNP|U12-type spliceosomal complex|cytosol|SMN-Sm protein complex|P granule|U2-type prespliceosome|catalytic step 2 spliceosome	ko03040	Spliceosome
CSS0033138	2	0.791775	1.68539e-15	5.62817e-14	Zinc finger A20 and AN1 domain-containing stress-associated protein	--	GO:0003677,GO:0008270	DNA binding|zinc ion binding	--	--
CSS0020416	2	0.592457	7.97779e-56	1.04695e-53	protein BUD31 homolog 2	--	GO:0000398,GO:0005681	mRNA splicing, via spliceosome|spliceosomal complex	ko03040	Spliceosome
CSS0029357	2	0.759496	4.72696e-43	4.61953e-41	60S acidic ribosomal protein P2B-like	--	GO:0003735,GO:0005840,GO:0006414	structural constituent of ribosome|ribosome|translational elongation	--	--
CSS0008647	1	0.969526	0.000165219	0.00196508	hypothetical protein JCGZ_25901	--	GO:0005743,GO:0005758,GO:0005886,GO:0016021,GO:0018063,GO:0020037,GO:0046872	mitochondrial inner membrane|mitochondrial intermembrane space|plasma membrane|integral component of membrane|cytochrome c-heme linkage|heme binding|metal ion binding	--	--
CSS0037862	2	0.686679	2.78364e-55	3.56059e-53	fructose-bisphosphate aldolase 2	--	GO:0004332,GO:0005737,GO:0006096	fructose-bisphosphate aldolase activity|cytoplasm|glycolytic process	ko00010,ko00030,ko00051,ko00710	Glycolysis / Gluconeogenesis|Pentose phosphate pathway|Fructose and mannose metabolism|Carbon fixation in photosynthetic organisms
CSS0040940	2	1.72316	5.53958e-24	2.76023e-22	uncharacterized protein LOC107432130	--	--	--	--	--
CSS0007762	2	0.93835	4.38584e-24	2.19836e-22	glutathione-s-transferase theta, gst, putative	--	GO:0004364,GO:0004602,GO:0005507,GO:0005737,GO:0005773,GO:0005829,GO:0005886,GO:0006749,GO:0006952,GO:0009407,GO:0009506,GO:0009507,GO:0009570,GO:0009579,GO:0010043,GO:0042742,GO:0043295,GO:0046686,GO:0048046	glutathione transferase activity|glutathione peroxidase activity|copper ion binding|cytoplasm|vacuole|cytosol|plasma membrane|glutathione metabolic process|defense response|toxin catabolic process|plasmodesma|chloroplast|chloroplast stroma|thylakoid|response to zinc ion|defense response to bacterium|glutathione binding|response to cadmium ion|apoplast	ko00480	Glutathione metabolism
CSS0042210	2	1.87842	4.65502e-13	1.34937e-11	Protein DMR6-LIKE OXYGENASE 1 like	--	GO:0002229,GO:0046244,GO:0046872,GO:0051213	defense response to oomycetes|salicylic acid catabolic process|metal ion binding|dioxygenase activity	--	--
CSS0024828	2	0.822266	4.79025e-05	0.000626041	hypothetical protein MANES_09G061900	--	GO:0000245,GO:0003723,GO:0005634,GO:0005686,GO:0005829,GO:0008270,GO:0071004,GO:0071013	spliceosomal complex assembly|RNA binding|nucleus|U2 snRNP|cytosol|zinc ion binding|U2-type prespliceosome|catalytic step 2 spliceosome	ko03040	Spliceosome
CSS0004382	2	0.875029	3.50654e-05	0.000467832	splicing factor 3A subunit 2	--	GO:0000245,GO:0003723,GO:0005634,GO:0005686,GO:0005829,GO:0008270,GO:0071004,GO:0071013	spliceosomal complex assembly|RNA binding|nucleus|U2 snRNP|cytosol|zinc ion binding|U2-type prespliceosome|catalytic step 2 spliceosome	ko03040	Spliceosome
CSS0001828	2	0.974038	3.73411e-25	1.95509e-23	Ras-related protein like	--	GO:0003924,GO:0005525,GO:0005777,GO:0005794,GO:0005886,GO:0006886,GO:0030742,GO:0032482,GO:0080115	GTPase activity|GTP binding|peroxisome|Golgi apparatus|plasma membrane|intracellular protein transport|GTP-dependent protein binding|Rab protein signal transduction|myosin XI tail binding	--	--
CSS0035495	2	0.840556	0	0	aquaporin protein 14	--	GO:0000326,GO:0005773,GO:0005774,GO:0006833,GO:0009705,GO:0009941,GO:0015204,GO:0015250,GO:0015840,GO:0016021,GO:0042807,GO:0080170	protein storage vacuole|vacuole|vacuolar membrane|water transport|plant-type vacuole membrane|chloroplast envelope|urea transmembrane transporter activity|water channel activity|urea transport|integral component of membrane|central vacuole|hydrogen peroxide transmembrane transport	--	--
CSS0008799	1	1.20199	8.12158e-09	1.67555e-07	Alpha carbonic anhydrase	--	GO:0004089,GO:0008270,GO:0009570	carbonate dehydratase activity|zinc ion binding|chloroplast stroma	ko00910	Nitrogen metabolism
CSS0022041	1	0.975168	1.58576e-21	7.15363e-20	Alpha carbonic anhydrase	--	GO:0004089,GO:0008270,GO:0009570	carbonate dehydratase activity|zinc ion binding|chloroplast stroma	ko00910	Nitrogen metabolism
CSS0016580	1	0.918485	3.24184e-65	5.18335e-63	Alpha carbonic anhydrase	--	GO:0004089,GO:0008270,GO:0009570	carbonate dehydratase activity|zinc ion binding|chloroplast stroma	ko00910	Nitrogen metabolism
CSS0044077	1	1.0894	3.87704e-19	1.56459e-17	Alpha carbonic anhydrase	--	GO:0004089,GO:0008270,GO:0009570	carbonate dehydratase activity|zinc ion binding|chloroplast stroma	ko00910	Nitrogen metabolism
CSS0019488	1	1.17459	2.82318e-14	8.85419e-13	Alpha carbonic anhydrase	--	GO:0004089,GO:0008270,GO:0009570	carbonate dehydratase activity|zinc ion binding|chloroplast stroma	ko00910	Nitrogen metabolism
CSS0029455	2	0.907843	1.05942e-08	2.15661e-07	hypothetical protein VITISV_042420	--	--	--	--	--
CSS0007009	2	1.14262	1.26921e-06	2.0686e-05	Acylphosphatase	--	--	--	ko00620	Pyruvate metabolism
CSS0024715	2	0.918047	3.80507e-11	9.53626e-10	DNA-directed RNA polymerase V subunit 5A like	--	GO:0000419,GO:0003677,GO:0003899,GO:0006360,GO:0006366,GO:0006383	RNA polymerase V complex|DNA binding|DNA-directed 5'-3' RNA polymerase activity|transcription by RNA polymerase I|transcription by RNA polymerase II|transcription by RNA polymerase III	ko03020	RNA polymerase
CSS0019413	2	0.896666	6.29559e-17	2.28018e-15	PREDICTED: uncharacterized protein LOC100249954	--	--	--	--	--
CSS0017161	2	1.01179	1.98331e-46	2.07467e-44	Heavy metal-associated isoprenylated plant protein, partial	--	GO:0005507,GO:0030001	copper ion binding|metal ion transport	--	--
CSS0008341	1	1.32615	1.22119e-08	2.47694e-07	cell division cycle protein 48	--	GO:0005524,GO:0005634,GO:0005737,GO:0005829,GO:0005886,GO:0016236,GO:0016887,GO:0030433,GO:0030970,GO:0031593,GO:0034098,GO:0051228,GO:0071712,GO:0097352	ATP binding|nucleus|cytoplasm|cytosol|plasma membrane|macroautophagy|ATPase activity|ubiquitin-dependent ERAD pathway|retrograde protein transport, ER to cytosol|polyubiquitin modification-dependent protein binding|VCP-NPL4-UFD1 AAA ATPase complex|mitotic spindle disassembly|ER-associated misfolded protein catabolic process|autophagosome maturation	ko04141	Protein processing in endoplasmic reticulum
CSS0047143	2	1.44857	0.000224553	0.00260517	aquaporin protein PIP2-1	--	GO:0005773,GO:0005886,GO:0009414,GO:0009506,GO:0015250,GO:0016021	vacuole|plasma membrane|response to water deprivation|plasmodesma|water channel activity|integral component of membrane	--	--
CSS0009931	1	1.26259	1.42019e-30	9.37973e-29	MLO-like protein	--	GO:0005516,GO:0005886,GO:0009817,GO:0016021	calmodulin binding|plasma membrane|defense response to fungus, incompatible interaction|integral component of membrane	--	--
CSS0036641	2	0.914866	1.97379e-06	3.14592e-05	PREDICTED: probable E3 ubiquitin-protein ligase LOG2	--	GO:0004842,GO:0005886,GO:0009737,GO:0046872,GO:0080144,GO:1901527	ubiquitin-protein transferase activity|plasma membrane|response to abscisic acid|metal ion binding|amino acid homeostasis|abscisic acid-activated signaling pathway involved in stomatal movement	ko04120	Ubiquitin mediated proteolysis
CSS0013358	2	0.934745	0.000140855	0.00169607	E3 ubiquitin-protein like	--	--	--	--	--
CSS0006107	1	0.979796	1.66655e-20	7.19066e-19	DnaJ protein like	--	GO:0005783,GO:0005788,GO:0005886,GO:0016032,GO:0044794	endoplasmic reticulum|endoplasmic reticulum lumen|plasma membrane|viral process|positive regulation by host of viral process	ko04141	Protein processing in endoplasmic reticulum
CSS0014211	2	0.895953	0.000177187	0.0020951	E3 ubiquitin-protein like	--	GO:0009908,GO:0010228,GO:0040008,GO:0043161,GO:0046872,GO:0061630	flower development|vegetative to reproductive phase transition of meristem|regulation of growth|proteasome-mediated ubiquitin-dependent protein catabolic process|metal ion binding|ubiquitin protein ligase activity	--	--
CSS0002503	2	0.95262	1.1881e-129	4.80231e-127	40S ribosomal protein S23	--	GO:0003735,GO:0006412,GO:0015935	structural constituent of ribosome|translation|small ribosomal subunit	ko03010	Ribosome
CSS0016730	1	0.932025	0.00047547	0.00522129	protein GPR107-like	--	--	--	--	--
CSS0033160	1	0.918131	0.000567924	0.00611689	Serine/threonine-protein kinase, partial	--	GO:0004674,GO:0004712,GO:0005524,GO:0006355	protein serine/threonine kinase activity|protein serine/threonine/tyrosine kinase activity|ATP binding|regulation of transcription, DNA-templated	--	--
CSS0024017	2	0.739122	9.96068e-07	1.64143e-05	ras-related protein RABE1a-like	--	GO:0000139,GO:0003924,GO:0005525,GO:0005773,GO:0005774,GO:0005886,GO:0006886,GO:0006904,GO:0009306,GO:0009873,GO:0017157,GO:0032482	Golgi membrane|GTPase activity|GTP binding|vacuole|vacuolar membrane|plasma membrane|intracellular protein transport|vesicle docking involved in exocytosis|protein secretion|ethylene-activated signaling pathway|regulation of exocytosis|Rab protein signal transduction	ko04144	Endocytosis
CSS0020614	2	0.898284	3.08275e-30	1.99687e-28	hypothetical protein CDL12_27701	--	GO:0005743,GO:0006811,GO:0045263	mitochondrial inner membrane|ion transport|proton-transporting ATP synthase complex, coupling factor F(o)	--	--
CSS0017480	2	1.98813	4.63496e-21	2.04883e-19	Histone superfamily protein	--	GO:0000786,GO:0003677,GO:0005730,GO:0005774,GO:0005829,GO:0005886,GO:0006334,GO:0009414,GO:0009506,GO:0009507,GO:0009579,GO:0046982	nucleosome|DNA binding|nucleolus|vacuolar membrane|cytosol|plasma membrane|nucleosome assembly|response to water deprivation|plasmodesma|chloroplast|thylakoid|protein heterodimerization activity	--	--
CSS0001710	2	0.845912	5.74664e-09	1.20928e-07	actin-depolymerizing factor 2	--	GO:0003779,GO:0015629,GO:0030042	actin binding|actin cytoskeleton|actin filament depolymerization	--	--
CSS0045891	2	0.925951	1.73838e-06	2.78212e-05	pectin acetylesterase 5-like	--	GO:0005576,GO:0009505,GO:0052793,GO:0071555	extracellular region|plant-type cell wall|pectin acetylesterase activity|cell wall organization	--	--
CSS0042900	2	6.59571	1.77492e-38	1.53558e-36	metallothionin 2	--	GO:0046872	metal ion binding	--	--
CSS0038231	2	0.933026	6.04698e-12	1.61056e-10	mitochondrial import inner membrane translocase subunit Tim9	--	GO:0042719,GO:0042721,GO:0045039,GO:0046872	mitochondrial intermembrane space protein transporter complex|TIM22 mitochondrial import inner membrane insertion complex|protein import into mitochondrial inner membrane|metal ion binding	--	--
CSS0002006	1	1.2366	2.04679e-33	1.49227e-31	RHOMBOID-like protein	--	GO:0000139,GO:0004252,GO:0005794,GO:0016021	Golgi membrane|serine-type endopeptidase activity|Golgi apparatus|integral component of membrane	--	--
CSS0049551	2	0.774581	4.08004e-08	7.8352e-07	Oxysterol-binding protein-related protein like	--	GO:0005783,GO:0005794,GO:0005829,GO:0007338,GO:0008289,GO:0009567,GO:0015248,GO:0016020,GO:0032934,GO:0043231	endoplasmic reticulum|Golgi apparatus|cytosol|single fertilization|lipid binding|double fertilization forming a zygote and endosperm|sterol transporter activity|membrane|sterol binding|intracellular membrane-bounded organelle	--	--
CSS0047206	2	0.905814	4.86514e-48	5.28627e-46	Light-harvesting complex-like protein	--	GO:0007623,GO:0009507,GO:0009523,GO:0009535,GO:0009644,GO:0015979,GO:0016021,GO:0016168,GO:0018298	circadian rhythm|chloroplast|photosystem II|chloroplast thylakoid membrane|response to high light intensity|photosynthesis|integral component of membrane|chlorophyll binding|protein-chromophore linkage	--	--
CSS0015142	1	1.00302	2.66367e-08	5.23869e-07	hypothetical protein CEY00_Acc15554	RWP-RK	GO:0003677,GO:0003700,GO:0005634	DNA binding|DNA-binding transcription factor activity|nucleus	--	--
CSS0042963	1	0.863403	0.000126348	0.00153344	PRA1 family protein A1-like	--	GO:0005783,GO:0005789,GO:0016021,GO:0016192	endoplasmic reticulum|endoplasmic reticulum membrane|integral component of membrane|vesicle-mediated transport	--	--
CSS0013363	2	8.59612	1.57173e-23	7.71736e-22	germin-like protein 9-3	--	GO:0005618,GO:0030145,GO:0045735,GO:0048046	cell wall|manganese ion binding|nutrient reservoir activity|apoplast	--	--
CSS0026065	2	1.10222	0.000271481	0.00311598	Helicase	--	--	--	--	--
CSS0025213	2	8.26408	7.62883e-06	0.000112375	putative lipid-transfer protein DIR1	--	--	--	--	--
CSS0010109	1	0.905412	0.000143746	0.00172759	MRNA guanylyltransferase	--	GO:0004484,GO:0005525,GO:0005634,GO:0006370,GO:0009452,GO:0031533	mRNA guanylyltransferase activity|GTP binding|nucleus|7-methylguanosine mRNA capping|7-methylguanosine RNA capping|mRNA cap methyltransferase complex	--	--
CSS0023503	1	0.858005	5.40345e-18	2.0777e-16	Phosphatidylinositol:ceramide inositolphosphotransferase	--	GO:0005802,GO:0005887,GO:0030148,GO:0030173,GO:0030176,GO:0033188,GO:0045140,GO:0046513,GO:0047493	trans-Golgi network|integral component of plasma membrane|sphingolipid biosynthetic process|integral component of Golgi membrane|integral component of endoplasmic reticulum membrane|sphingomyelin synthase activity|inositol phosphoceramide synthase activity|ceramide biosynthetic process|ceramide cholinephosphotransferase activity	--	--
CSS0032515	2	0.87563	3.48607e-13	1.01694e-11	mitochondrial import inner membrane translocase subunit TIM10	--	GO:0005743,GO:0005758,GO:0008565,GO:0042721,GO:0045039,GO:0046872	mitochondrial inner membrane|mitochondrial intermembrane space|protein transporter activity|TIM22 mitochondrial import inner membrane insertion complex|protein import into mitochondrial inner membrane|metal ion binding	--	--
CSS0011345	2	1.26265	2.61482e-13	7.69894e-12	auxin transport carrier	--	GO:0005886,GO:0006865,GO:0009734,GO:0015293,GO:0016021	plasma membrane|amino acid transport|auxin-activated signaling pathway|symporter activity|integral component of membrane	ko04075	Plant hormone signal transduction
CSS0017898	2	0.72711	2.30347e-42	2.21681e-40	Clathrin light chain like	--	GO:0005198,GO:0005886,GO:0006886,GO:0030125,GO:0030130,GO:0030132,GO:0032050,GO:0048268,GO:0072583	structural molecule activity|plasma membrane|intracellular protein transport|clathrin vesicle coat|clathrin coat of trans-Golgi network vesicle|clathrin coat of coated pit|clathrin heavy chain binding|clathrin coat assembly|clathrin-dependent endocytosis	--	--
CSS0039608	2	0.80881	1.07696e-25	5.83211e-24	High mobility group B protein	--	GO:0003677,GO:0005634	DNA binding|nucleus	--	--
CSS0004127	1	0.930369	1.2927e-05	0.00018445	Symplekin like	--	GO:0005847,GO:0005849,GO:0006378,GO:0008033,GO:0030846,GO:0030847,GO:0098789	mRNA cleavage and polyadenylation specificity factor complex|mRNA cleavage factor complex|mRNA polyadenylation|tRNA processing|termination of RNA polymerase II transcription, poly(A)-coupled|termination of RNA polymerase II transcription, exosome-dependent|pre-mRNA cleavage required for polyadenylation	ko03015	mRNA surveillance pathway
CSS0023783	2	0.868407	2.54888e-05	0.000347497	DnaJ subfamily B member like	--	GO:0002183,GO:0005634,GO:0005829,GO:0006413,GO:0030544,GO:0051082,GO:0051085,GO:0051087	cytoplasmic translational initiation|nucleus|cytosol|translational initiation|Hsp70 protein binding|unfolded protein binding|chaperone cofactor-dependent protein refolding|chaperone binding	--	--
CSS0019219	2	1.09874	1.16747e-07	2.13101e-06	Myb family transcription factor	GARP-G2-like	GO:0003677,GO:0003700,GO:0005634,GO:0006355	DNA binding|DNA-binding transcription factor activity|nucleus|regulation of transcription, DNA-templated	--	--
CSS0011888	2	1.45344	4.65823e-05	0.000609733	hypothetical protein CEY00_Acc01793	--	GO:0005829,GO:0009813,GO:0046872,GO:0051213,GO:0080167,GO:0097237,GO:0120091,GO:2000022	cytosol|flavonoid biosynthetic process|metal ion binding|dioxygenase activity|response to karrikin|cellular response to toxic substance|jasmonic acid hydrolase|regulation of jasmonic acid mediated signaling pathway	--	--
CSS0028267	2	0.773385	2.09587e-18	8.20883e-17	Acyl-coenzyme A oxidase 4, peroxisomal like	--	GO:0003995,GO:0003997,GO:0005777,GO:0006635,GO:0009514,GO:0009793,GO:0046459,GO:0050660	acyl-CoA dehydrogenase activity|acyl-CoA oxidase activity|peroxisome|fatty acid beta-oxidation|glyoxysome|embryo development ending in seed dormancy|short-chain fatty acid metabolic process|flavin adenine dinucleotide binding	ko00071,ko00410,ko00592,ko00640,ko01040,ko04146	Fatty acid degradation|beta-Alanine metabolism|alpha-Linolenic acid metabolism|Propanoate metabolism|Biosynthesis of unsaturated fatty acids|Peroxisome
CSS0012400	1	0.987614	0.000485714	0.0053199	AMP deaminese	--	GO:0003876,GO:0005524,GO:0005634,GO:0005783,GO:0005829,GO:0009737,GO:0009793,GO:0031307,GO:0032264,GO:0043231,GO:0043424,GO:0046872	AMP deaminase activity|ATP binding|nucleus|endoplasmic reticulum|cytosol|response to abscisic acid|embryo development ending in seed dormancy|integral component of mitochondrial outer membrane|IMP salvage|intracellular membrane-bounded organelle|protein histidine kinase binding|metal ion binding	ko00230	Purine metabolism
CSS0018345	2	0.923796	1.08534e-05	0.000156498	chlorophyll synthase	--	GO:0009507,GO:0009534,GO:0015995,GO:0016021,GO:0031969,GO:0046408	chloroplast|chloroplast thylakoid|chlorophyll biosynthetic process|integral component of membrane|chloroplast membrane|chlorophyll synthetase activity	ko00860	Porphyrin and chlorophyll metabolism
CSS0010779	2	0.933409	1.30837e-07	2.37789e-06	PREDICTED: uncharacterized protein LOC108994891	--	GO:0000776,GO:0005634,GO:0007049,GO:0009933,GO:0051301,GO:0051781,GO:0051983	kinetochore|nucleus|cell cycle|meristem structural organization|cell division|positive regulation of cell division|regulation of chromosome segregation	--	--
CSS0036950	2	0.932936	2.62437e-13	7.72256e-12	Ferritin-3 like	--	GO:0004322,GO:0006826,GO:0006879,GO:0008199,GO:0009507	ferroxidase activity|iron ion transport|cellular iron ion homeostasis|ferric iron binding|chloroplast	--	--
CSS0007401	2	1.36076	3.5861e-06	5.52233e-05	Abscisic acid receptor like	--	GO:0004864,GO:0005634,GO:0005737,GO:0005886,GO:0009738,GO:0010427,GO:0038023,GO:0042803,GO:0080163	protein phosphatase inhibitor activity|nucleus|cytoplasm|plasma membrane|abscisic acid-activated signaling pathway|abscisic acid binding|signaling receptor activity|protein homodimerization activity|regulation of protein serine/threonine phosphatase activity	ko04016,ko04075	MAPK signaling pathway - plant|Plant hormone signal transduction
CSS0039440	1	1.12513	1.14402e-52	1.39617e-50	PRA1 family protein	--	GO:0005768,GO:0005783,GO:0005794,GO:0005802,GO:0005829,GO:0010008,GO:0016021,GO:0016192	endosome|endoplasmic reticulum|Golgi apparatus|trans-Golgi network|cytosol|endosome membrane|integral component of membrane|vesicle-mediated transport	--	--
CSS0009284	2	0.930161	6.07839e-27	3.4314e-25	macrophage migration inhibitory factor homolog isoform X1	--	--	--	--	--
CSS0046750	1	0.914437	0.000377768	0.00422181	Demethylmenaquinone methyltransferase	--	--	--	--	--
CSS0030399	1	0.978157	5.22118e-10	1.20843e-08	uncharacterized protein LOC110632091	--	--	--	--	--
CSS0023871	2	0.881061	5.24908e-15	1.71324e-13	hypothetical protein PHAVU_001G247900g	--	GO:0005622,GO:0006886,GO:0016020,GO:0016192	intracellular|intracellular protein transport|membrane|vesicle-mediated transport	--	--
CSS0024307	2	1.25089	3.63301e-14	1.12612e-12	Saposin-D like	--	--	--	--	--
CSS0039997	1	1.08598	1.15446e-07	2.10955e-06	CBL-interacting serine/threonine-protein kinase	--	GO:0004674,GO:0005524,GO:0005634,GO:0005737,GO:0005773,GO:0006979,GO:0007165,GO:0009408,GO:0009409,GO:0009414,GO:0009506,GO:0009651,GO:0009737,GO:0009749,GO:0019900	protein serine/threonine kinase activity|ATP binding|nucleus|cytoplasm|vacuole|response to oxidative stress|signal transduction|response to heat|response to cold|response to water deprivation|plasmodesma|response to salt stress|response to abscisic acid|response to glucose|kinase binding	--	--
CSS0046647	2	0.893922	3.01724e-18	1.17537e-16	cysteine proteinase inhibitor 12-like	--	GO:0004869,GO:0005576,GO:0006952	cysteine-type endopeptidase inhibitor activity|extracellular region|defense response	--	--
CSS0003562	2	0.854001	1.23387e-13	3.70636e-12	PREDICTED: cytochrome P450 98A2	--	GO:0005506,GO:0009809,GO:0016020,GO:0016021,GO:0016709,GO:0020037	iron ion binding|lignin biosynthetic process|membrane|integral component of membrane|oxidoreductase activity, acting on paired donors, with incorporation or reduction of molecular oxygen, NAD(P)H as one donor, and incorporation of one atom of oxygen|heme binding	ko00940,ko00941,ko00945	Phenylpropanoid biosynthesis|Flavonoid biosynthesis|Stilbenoid, diarylheptanoid and gingerol biosynthesis
CSS0031087	1	0.87121	1.61427e-09	3.57568e-08	bZIP transcription factor family protein 9	bZIP	GO:0000139,GO:0003677,GO:0003700,GO:0005634,GO:0005783,GO:0005789,GO:0006355,GO:0006990,GO:0016021,GO:0034976,GO:0042538,GO:0045893	Golgi membrane|DNA binding|DNA-binding transcription factor activity|nucleus|endoplasmic reticulum|endoplasmic reticulum membrane|regulation of transcription, DNA-templated|positive regulation of transcription from RNA polymerase II promoter involved in unfolded protein response|integral component of membrane|response to endoplasmic reticulum stress|hyperosmotic salinity response|positive regulat…	--	--
CSS0018263	2	1.07092	1.65348e-12	4.62582e-11	R3H domain-containing protein	--	--	--	--	--
CSS0017266	1	0.951565	0.000653283	0.00692409	Disease resistance protein	--	--	--	--	--
CSS0015252	2	0.565823	0.000636012	0.00675947	R3H domain-containing protein	--	--	--	--	--
CSS0039389	1	0.863049	0.00042848	0.00474237	Arginine/serine-rich coiled-coil protein	--	--	--	--	--
CSS0046038	2	0.938938	3.43207e-07	5.9426e-06	10 kDa chaperonin, mitochondrial-like isoform X2	--	GO:0005507,GO:0005524,GO:0005739,GO:0005759,GO:0009408,GO:0046872,GO:0051082,GO:0051085,GO:0051087	copper ion binding|ATP binding|mitochondrion|mitochondrial matrix|response to heat|metal ion binding|unfolded protein binding|chaperone cofactor-dependent protein refolding|chaperone binding	--	--
CSS0049206	2	2.22529	1.78067e-05	0.000248531	tubulin beta-4 chain	--	GO:0000226,GO:0000278,GO:0003924,GO:0005200,GO:0005525,GO:0005737,GO:0005874,GO:0007017	microtubule cytoskeleton organization|mitotic cell cycle|GTPase activity|structural constituent of cytoskeleton|GTP binding|cytoplasm|microtubule|microtubule-based process	ko04145	Phagosome
CSS0046294	2	0.977167	3.06749e-30	1.98953e-28	Haloacid dehalogenase-like hydrolase domain-containing protein	--	GO:0005634,GO:0005829,GO:0016791	nucleus|cytosol|phosphatase activity	--	--
CSS0036916	1	0.937786	0.000610295	0.00651218	Kinesin-like protein	--	GO:0003777,GO:0005524,GO:0005871,GO:0005874,GO:0007018,GO:0008017,GO:0016887	microtubule motor activity|ATP binding|kinesin complex|microtubule|microtubule-based movement|microtubule binding|ATPase activity	--	--
CSS0028523	2	0.822194	4.80084e-34	3.58821e-32	DNA-directed RNA polymerase V subunit 5A like	--	GO:0000419,GO:0003677,GO:0003899,GO:0006360,GO:0006366,GO:0006383	RNA polymerase V complex|DNA binding|DNA-directed 5'-3' RNA polymerase activity|transcription by RNA polymerase I|transcription by RNA polymerase II|transcription by RNA polymerase III	ko03020	RNA polymerase
CSS0037446	2	0.873686	0.000185709	0.00218564	Ganglioside-induced differentiation-associated protein	--	--	--	--	--
CSS0018961	2	7.3606	9.91388e-09	2.0261e-07	conserved hypothetical protein	--	--	--	--	--
CSS0000847	2	0.941225	0.000104438	0.00128575	Triacylglycerol lipase	--	GO:0004806,GO:0006071,GO:0006641,GO:0012511,GO:0016021,GO:0019433	triglyceride lipase activity|glycerol metabolic process|triglyceride metabolic process|monolayer-surrounded lipid storage body|integral component of membrane|triglyceride catabolic process	ko00100,ko00561,ko00564,ko00565,ko00590,ko00591,ko00592	Steroid biosynthesis|Glycerolipid metabolism|Glycerophospholipid metabolism|Ether lipid metabolism|Arachidonic acid metabolism|Linoleic acid metabolism|alpha-Linolenic acid metabolism
CSS0030968	1	0.922309	2.52349e-08	4.9785e-07	Glycosyltransferase-like KOBITO	--	GO:0005576,GO:0005737,GO:0005886,GO:0007049,GO:0007275,GO:0009505,GO:0016757,GO:0030154,GO:0040008,GO:0051301,GO:0071555	extracellular region|cytoplasm|plasma membrane|cell cycle|multicellular organism development|plant-type cell wall|transferase activity, transferring glycosyl groups|cell differentiation|regulation of growth|cell division|cell wall organization	--	--
CSS0019779	1	1.03785	3.01001e-09	6.50195e-08	UDP-N-acetylglucosamine--dolichyl-phosphate N-acetylglucosaminephosphotransferase	--	GO:0003975,GO:0005783,GO:0006487,GO:0006489,GO:0006491,GO:0008963,GO:0016021,GO:0016757,GO:0030176	UDP-N-acetylglucosamine-dolichyl-phosphate N-acetylglucosaminephosphotransferase activity|endoplasmic reticulum|protein N-linked glycosylation|dolichyl diphosphate biosynthetic process|N-glycan processing|phospho-N-acetylmuramoyl-pentapeptide-transferase activity|integral component of membrane|transferase activity, transferring glycosyl groups|integral component of endoplasmic reticulum membrane	ko00510	N-Glycan biosynthesis
CSS0033392	1	1.3005	6.6004e-48	7.12575e-46	Calcium-transporting ATPase	--	GO:0000325,GO:0005388,GO:0005516,GO:0005524,GO:0005773,GO:0005774,GO:0005887,GO:0009507,GO:0009624,GO:0009705,GO:0042742,GO:0043069,GO:0046872,GO:0055081	plant-type vacuole|calcium-transporting ATPase activity|calmodulin binding|ATP binding|vacuole|vacuolar membrane|integral component of plasma membrane|chloroplast|response to nematode|plant-type vacuole membrane|defense response to bacterium|negative regulation of programmed cell death|metal ion binding|anion homeostasis	--	--
CSS0020451	2	1.30902	5.37399e-05	0.000696386	Zeatin O-glucosyltransferase	--	GO:0006486,GO:0009690,GO:0016758,GO:0050404	protein glycosylation|cytokinin metabolic process|transferase activity, transferring hexosyl groups|zeatin O-beta-D-xylosyltransferase activity	ko00908	Zeatin biosynthesis
CSS0038690	1	1.86825	2.26782e-07	4.01759e-06	Zeatin O-glucosyltransferase	--	GO:0006486,GO:0009690,GO:0016758,GO:0050404	protein glycosylation|cytokinin metabolic process|transferase activity, transferring hexosyl groups|zeatin O-beta-D-xylosyltransferase activity	ko00908	Zeatin biosynthesis
CSS0013319	1	0.917523	7.80418e-10	1.77376e-08	ABC transporter A family member 1 isoform X2	--	GO:0005524,GO:0005774,GO:0006869,GO:0016021,GO:0042626,GO:0043231	ATP binding|vacuolar membrane|lipid transport|integral component of membrane|ATPase activity, coupled to transmembrane movement of substances|intracellular membrane-bounded organelle	ko02010	ABC transporters
CSS0011764	2	0.951141	2.6573e-05	0.000361011	Josephin-1 like	--	--	--	--	--
CSS0009994	2	0.859722	1.87199e-11	4.80845e-10	uncharacterized protein Pyn_24429	--	--	--	--	--
CSS0016299	1	0.937587	1.93826e-05	0.000269484	Protein EFR3 B like	--	--	--	--	--
CSS0000810	1	1.0222	0.000480689	0.00527287	sn-glycerol-3-phosphate acyltransferase	--	GO:0003841,GO:0005783,GO:0005789,GO:0007275,GO:0016021,GO:0016024,GO:0016746	1-acylglycerol-3-phosphate O-acyltransferase activity|endoplasmic reticulum|endoplasmic reticulum membrane|multicellular organism development|integral component of membrane|CDP-diacylglycerol biosynthetic process|transferase activity, transferring acyl groups	ko00561,ko00564	Glycerolipid metabolism|Glycerophospholipid metabolism
CSS0006388	1	1.90559	4.17797e-47	4.44404e-45	Coronin-2A like	--	--	--	--	--
CSS0033131	2	1.05161	2.16457e-09	4.74056e-08	Chaperone protein like	--	GO:0005634	nucleus	--	--
CSS0038720	2	1.16371	3.14743e-10	7.39991e-09	(-)-alpha-terpineol synthase	--	GO:0000287,GO:0010333,GO:0016114	magnesium ion binding|terpene synthase activity|terpenoid biosynthetic process	--	--
CSS0026605	1	1.09212	1.14206e-54	1.44256e-52	fatty acid desaturase	--	GO:0005789,GO:0006636,GO:0016021,GO:0102985	endoplasmic reticulum membrane|unsaturated fatty acid biosynthetic process|integral component of membrane|Delta12-fatty-acid desaturase activity	ko01040	Biosynthesis of unsaturated fatty acids
CSS0028495	2	0.932651	1.93159e-06	3.08158e-05	Thioredoxin-like	--	GO:0006662,GO:0009570,GO:0015035,GO:0045454	glycerol ether metabolic process|chloroplast stroma|protein disulfide oxidoreductase activity|cell redox homeostasis	--	--
CSS0007798	1	1.00878	4.60074e-09	9.77513e-08	Calcium load-activated calcium channel like	--	--	--	--	--
CSS0009976	2	1.32756	2.0839e-51	2.45429e-49	F-box/kelch-repeat protein	--	GO:0005829,GO:2000762	cytosol|regulation of phenylpropanoid metabolic process	--	--
CSS0044984	2	0.828545	1.13749e-19	4.73016e-18	Mediator complex, subunit Med7	--	GO:0003712,GO:0006357,GO:0016592,GO:0070847	transcription coregulator activity|regulation of transcription by RNA polymerase II|mediator complex|core mediator complex	--	--
CSS0026984	1	0.853327	1.52793e-05	0.00021576	Eukaryotic translation initiation factor 3 subunit C like	--	GO:0001732,GO:0003743,GO:0005852,GO:0016282,GO:0031369,GO:0033290	formation of cytoplasmic translation initiation complex|translation initiation factor activity|eukaryotic translation initiation factor 3 complex|eukaryotic 43S preinitiation complex|translation initiation factor binding|eukaryotic 48S preinitiation complex	ko03013	RNA transport
CSS0023364	2	0.739521	4.34377e-09	9.23691e-08	40S ribosomal protein like	--	GO:0003723,GO:0003735,GO:0006412,GO:0015935	RNA binding|structural constituent of ribosome|translation|small ribosomal subunit	ko03010	Ribosome
CSS0031786	2	0.761541	6.37736e-09	1.33368e-07	Eukaryotic translation initiation factor NCBP like	--	GO:0003743,GO:0005829,GO:0006417	translation initiation factor activity|cytosol|regulation of translation	ko03013	RNA transport
CSS0008476	2	0.862066	0.000205574	0.0024032	Glutamyl-tRNA reductase-binding protein	--	--	--	--	--
CSS0032159	2	0.953215	2.11254e-11	5.41258e-10	Chaperone protein like	--	GO:0005524,GO:0006457,GO:0009408,GO:0009507,GO:0009535,GO:0009941,GO:0031072,GO:0046872,GO:0051082	ATP binding|protein folding|response to heat|chloroplast|chloroplast thylakoid membrane|chloroplast envelope|heat shock protein binding|metal ion binding|unfolded protein binding	--	--
CSS0015391	1	0.990113	2.03649e-05	0.000282365	hypothetical protein CFOL_v3_35878	--	--	--	--	--
CSS0007651	1	1.14283	2.82903e-40	2.53434e-38	Glucan endo-1,3-beta-glucosidase	--	GO:0005618,GO:0005886,GO:0005975,GO:0006952,GO:0009506,GO:0009664,GO:0031225,GO:0042973,GO:0046658,GO:0048046	cell wall|plasma membrane|carbohydrate metabolic process|defense response|plasmodesma|plant-type cell wall organization|anchored component of membrane|glucan endo-1,3-beta-D-glucosidase activity|anchored component of plasma membrane|apoplast	--	--
CSS0010834	2	0.878074	7.39498e-09	1.53695e-07	Ankyrin repeat and KH domain-containing protein	--	--	--	--	--
CSS0000861	2	0.849497	9.07524e-13	2.58179e-11	aquaporin protein AQU20	--	GO:0015267,GO:0016021	channel activity|integral component of membrane	--	--
CSS0039347	1	0.840675	1.70597e-23	8.35216e-22	Apyrase	--	GO:0000139,GO:0005524,GO:0016021,GO:0102485,GO:0102486,GO:0102487,GO:0102488,GO:0102489,GO:0102490,GO:0102491	Golgi membrane|ATP binding|integral component of membrane|dATP phosphohydrolase activity|dCTP phosphohydrolase activity|dUTP phosphohydrolase activity|dTTP phosphohydrolase activity|GTP phosphohydrolase activity|8-oxo-dGTP phosphohydrolase activity|dGTP phosphohydrolase activity	--	--
CSS0030537	2	0.512061	1.15576e-101	3.28059e-99	Cathepsin B heavy chain like	--	GO:0004197,GO:0005615,GO:0005764,GO:0005773,GO:0006952,GO:0050790,GO:0051603	cysteine-type endopeptidase activity|extracellular space|lysosome|vacuole|defense response|regulation of catalytic activity|proteolysis involved in cellular protein catabolic process	--	--
CSS0000718	2	0.827471	3.29885e-08	6.39088e-07	Protein FAM192A like	--	--	--	--	--
CSS0012953	1	1.08121	7.80283e-05	0.000983874	Calcium and calcium/calmodulin-dependent serine/threonine-protein kinase	--	--	--	--	--
CSS0008406	2	0.87103	2.70354e-08	5.30471e-07	cyclase/dehydrase protein	--	--	--	--	--
CSS0047342	2	0.89832	1.77865e-12	4.96498e-11	hypothetical protein POPTR_002G191400v3	--	GO:0005525,GO:0005737,GO:0005794,GO:0006471,GO:0006886,GO:0016192	GTP binding|cytoplasm|Golgi apparatus|protein ADP-ribosylation|intracellular protein transport|vesicle-mediated transport	--	--
CSS0030708	1	0.988002	4.20204e-06	6.40447e-05	gibberellin 2-oxidase 6	--	GO:0009686,GO:0045543,GO:0046872	gibberellin biosynthetic process|gibberellin 2-beta-dioxygenase activity|metal ion binding	ko00904	Diterpenoid biosynthesis
CSS0013893	2	1.18484	2.62359e-19	1.06643e-17	PREDICTED: probable WRKY transcription factor 69 isoform X1	WRKY	GO:0003700,GO:0005634,GO:0009555,GO:0009793,GO:0043565,GO:0044212	DNA-binding transcription factor activity|nucleus|pollen development|embryo development ending in seed dormancy|sequence-specific DNA binding|transcription regulatory region DNA binding	--	--
CSS0016868	1	1.08561	1.69099e-05	0.000236819	Limonene hydroxylase	--	GO:0002213,GO:0008970,GO:0009507,GO:0009570,GO:0016042,GO:0031349,GO:0031969,GO:0047714,GO:0052739,GO:0052740,GO:0102549	defense response to insect|phospholipase A1 activity|chloroplast|chloroplast stroma|lipid catabolic process|positive regulation of defense response|chloroplast membrane|galactolipase activity|phosphatidylserine 1-acylhydrolase activity|1-acyl-2-lysophosphatidylserine acylhydrolase activity|1-18:1-2-16:0-monogalactosyldiacylglycerol lipase activity	--	--
CSS0028094	2	0.878732	6.42764e-06	9.59399e-05	transcription initiation factor TFIID subunit 13 isoform X2	--	GO:0003677,GO:0003712,GO:0005634,GO:0005669,GO:0005886,GO:0006357,GO:0006366,GO:0009793,GO:0009960,GO:0046982,GO:0048316	DNA binding|transcription coregulator activity|nucleus|transcription factor TFIID complex|plasma membrane|regulation of transcription by RNA polymerase II|transcription by RNA polymerase II|embryo development ending in seed dormancy|endosperm development|protein heterodimerization activity|seed development	ko03022	Basal transcription factors
CSS0022759	2	4.9909	1.7759e-168	9.64811e-166	major allergen pru ar 1	--	GO:0006952,GO:0009607	defense response|response to biotic stimulus	--	--
CSS0032777	2	1.00921	4.01042966042257e-319	6.53635351574525e-316	major allergen pru ar 1	--	GO:0006952,GO:0009607	defense response|response to biotic stimulus	--	--
CSS0049942	2	1.90991	1.22745e-14	3.92265e-13	hypothetical protein CDL15_Pgr011293	--	GO:0006952,GO:0009607	defense response|response to biotic stimulus	--	--
CSS0043071	2	0.514272	1.72326e-46	1.81014e-44	hypothetical protein CRG98_038286	--	GO:0003729,GO:0003735,GO:0005886,GO:0006412,GO:0022625	mRNA binding|structural constituent of ribosome|plasma membrane|translation|cytosolic large ribosomal subunit	ko03010	Ribosome
CSS0031448	2	0.888343	9.90285e-29	5.99211e-27	Ethylene-responsive transcription factor RAP2-3 like	AP2/ERF-ERF	GO:0003677,GO:0003700,GO:0005634,GO:0009873,GO:0034059,GO:2000280	DNA binding|DNA-binding transcription factor activity|nucleus|ethylene-activated signaling pathway|response to anoxia|regulation of root development	--	--
CSS0035247	2	0.844766	2.00748e-63	3.05506e-61	Ethylene-responsive transcription factor RAP2-3 like	AP2/ERF-ERF	GO:0003677,GO:0003700,GO:0005634,GO:0009873,GO:0034059,GO:2000280	DNA binding|DNA-binding transcription factor activity|nucleus|ethylene-activated signaling pathway|response to anoxia|regulation of root development	--	--
CSS0026770	2	0.647859	0.000349155	0.00393071	sucrose synthase 2	--	GO:0005985,GO:0016157	sucrose metabolic process|sucrose synthase activity	ko00500	Starch and sucrose metabolism
CSS0030098	1	2.94123	6.23003e-243	6.05331e-240	Pectinesterase	--	GO:0005576,GO:0005618,GO:0009409,GO:0009620,GO:0009741,GO:0030599,GO:0042545,GO:0045330,GO:0045490,GO:0046910	extracellular region|cell wall|response to cold|response to fungus|response to brassinosteroid|pectinesterase activity|cell wall modification|aspartyl esterase activity|pectin catabolic process|pectinesterase inhibitor activity	ko00040	Pentose and glucuronate interconversions
CSS0001796	1	1.16979	8.69558e-09	1.78959e-07	Protein of unknown function DUF538 protein	--	--	--	--	--
CSS0043962	2	0.679513	1.12162e-79	2.29433e-77	late embryogenesis abundant protein 3L-1	--	GO:0000302,GO:0005739,GO:0006952,GO:0006979,GO:0009409,GO:0009414,GO:0009416,GO:0009611,GO:0009620,GO:0009625,GO:0009646,GO:0009723,GO:0009737,GO:0010150,GO:0042542,GO:0042631,GO:0048364,GO:1900055,GO:1900150,GO:1900424,GO:1902074,GO:2000028	response to reactive oxygen species|mitochondrion|defense response|response to oxidative stress|response to cold|response to water deprivation|response to light stimulus|response to wounding|response to fungus|response to insect|response to absence of light|response to ethylene|response to abscisic acid|leaf senescence|response to hydrogen peroxide|cellular response to water deprivation|root deve…	--	--
CSS0004919	2	0.769607	1.72824e-34	1.3111e-32	Mediator of RNA polymerase II transcription subunit like	--	GO:0006355,GO:0016592,GO:1900055	regulation of transcription, DNA-templated|mediator complex|regulation of leaf senescence	--	--
CSS0005324	1	1.46759	1.13199e-10	2.74049e-09	PREDICTED: UDP-glucuronic acid decarboxylase 2	--	GO:0000139,GO:0005737,GO:0005768,GO:0005794,GO:0005802,GO:0005886,GO:0008460,GO:0016020,GO:0016021,GO:0019305,GO:0032580,GO:0033320,GO:0042732,GO:0048040,GO:0070403	Golgi membrane|cytoplasm|endosome|Golgi apparatus|trans-Golgi network|plasma membrane|dTDP-glucose 4,6-dehydratase activity|membrane|integral component of membrane|dTDP-rhamnose biosynthetic process|Golgi cisterna membrane|UDP-D-xylose biosynthetic process|D-xylose metabolic process|UDP-glucuronate decarboxylase activity|NAD+ binding	ko00520	Amino sugar and nucleotide sugar metabolism
CSS0045266	2	0.96937	4.92816e-05	0.000643066	Beta-glucosidase, partial	--	GO:0005975,GO:0008422,GO:0102483	carbohydrate metabolic process|beta-glucosidase activity|scopolin beta-glucosidase activity	ko00460,ko00500,ko00940	Cyanoamino acid metabolism|Starch and sucrose metabolism|Phenylpropanoid biosynthesis
CSS0042643	2	0.622045	3.72202e-56	4.92291e-54	PREDICTED: universal stress protein PHOS34	--	GO:0002238,GO:0005524,GO:0009507	response to molecule of fungal origin|ATP binding|chloroplast	--	--
CSS0037568	2	0.904792	8.41677e-15	2.71557e-13	Universal stress protein	--	GO:0002238,GO:0005524,GO:0009507	response to molecule of fungal origin|ATP binding|chloroplast	--	--
CSS0035923	2	0.968844	0.000611301	0.00652016	uncharacterized protein LOC112507024	--	--	--	--	--
CSS0038911	2	0.926902	9.57692e-09	1.959e-07	Universal stress protein	--	GO:0002238,GO:0005524,GO:0009507	response to molecule of fungal origin|ATP binding|chloroplast	--	--
CSS0023982	2	1.00826	5.01151e-06	7.56518e-05	E3 ubiquitin-protein ligase BAH1-like	--	GO:0004842,GO:0005634,GO:0005886,GO:0009626,GO:0009627,GO:0009697,GO:0009751,GO:0010167,GO:0010337,GO:0042742,GO:0046872,GO:0080021	ubiquitin-protein transferase activity|nucleus|plasma membrane|plant-type hypersensitive response|systemic acquired resistance|salicylic acid biosynthetic process|response to salicylic acid|response to nitrate|regulation of salicylic acid metabolic process|defense response to bacterium|metal ion binding|response to benzoic acid	--	--
CSS0001863	2	0.743693	3.43222e-29	2.11479e-27	uncharacterized protein Pyn_33942	--	--	--	--	--
CSS0019258	2	0.93085	1.99835e-06	3.18115e-05	WD repeat-containing protein	--	GO:0007275,GO:0010029,GO:0040008	multicellular organism development|regulation of seed germination|regulation of growth	--	--
CSS0010073	1	0.881404	9.5884e-13	2.72471e-11	Spastin like	--	GO:0005524,GO:0005634,GO:0006281,GO:0006310,GO:0008568,GO:0010569,GO:0016887,GO:0031122,GO:0045128	ATP binding|nucleus|DNA repair|DNA recombination|microtubule-severing ATPase activity|regulation of double-strand break repair via homologous recombination|ATPase activity|cytoplasmic microtubule organization|negative regulation of reciprocal meiotic recombination	--	--
CSS0038127	2	0.998147	0.000111954	0.00137226	Dephospho-CoA kinase	--	GO:0004140,GO:0005524,GO:0005773,GO:0005777,GO:0009507,GO:0015937	dephospho-CoA kinase activity|ATP binding|vacuole|peroxisome|chloroplast|coenzyme A biosynthetic process	ko00770	Pantothenate and CoA biosynthesis
CSS0003128	2	0.580567	1.91919e-214	1.44727e-211	Glutathione S-transferase	--	GO:0004364,GO:0009734	glutathione transferase activity|auxin-activated signaling pathway	ko00480	Glutathione metabolism
CSS0002109	1	1.41187	2.13457e-08	4.23934e-07	Germin-like protein subfamily 1 member 13	--	GO:0005618,GO:0030145,GO:0045735,GO:0048046	cell wall|manganese ion binding|nutrient reservoir activity|apoplast	--	--
CSS0029926	1	0.93125	3.21267e-09	6.90724e-08	hexokinase 4	--	GO:0001678,GO:0004340,GO:0005524,GO:0005536,GO:0005739,GO:0005829,GO:0006096,GO:0006970,GO:0008865,GO:0009409,GO:0009536,GO:0009651,GO:0019158,GO:0031307,GO:0080147	cellular glucose homeostasis|glucokinase activity|ATP binding|glucose binding|mitochondrion|cytosol|glycolytic process|response to osmotic stress|fructokinase activity|response to cold|plastid|response to salt stress|mannokinase activity|integral component of mitochondrial outer membrane|root hair cell development	ko00010,ko00051,ko00052,ko00500,ko00520	Glycolysis / Gluconeogenesis|Fructose and mannose metabolism|Galactose metabolism|Starch and sucrose metabolism|Amino sugar and nucleotide sugar metabolism
CSS0002269	2	0.909469	0.000549021	0.00593227	Centromere protein like	--	--	--	--	--
CSS0020008	2	0.882233	0.000726776	0.00762466	prefoldin subunit 6	--	GO:0005634,GO:0005737,GO:0005829,GO:0006457,GO:0007021,GO:0016272,GO:0051082,GO:0051087,GO:0051131	nucleus|cytoplasm|cytosol|protein folding|tubulin complex assembly|prefoldin complex|unfolded protein binding|chaperone binding|chaperone-mediated protein complex assembly	--	--
CSS0023139	1	0.927275	2.04095e-11	5.23447e-10	Mannosyl-oligosaccharide 1,2-alpha-mannosidase	--	GO:0004559,GO:0004571,GO:0005509,GO:0005768,GO:0005783,GO:0005794,GO:0005802,GO:0006486,GO:0006491,GO:0016021	alpha-mannosidase activity|mannosyl-oligosaccharide 1,2-alpha-mannosidase activity|calcium ion binding|endosome|endoplasmic reticulum|Golgi apparatus|trans-Golgi network|protein glycosylation|N-glycan processing|integral component of membrane	ko00510,ko00513,ko04141	N-Glycan biosynthesis|Various types of N-glycan biosynthesis|Protein processing in endoplasmic reticulum
CSS0024429	1	0.997009	2.39716e-05	0.000328674	NAD(H) kinase	--	GO:0003951,GO:0005524,GO:0006741,GO:0019674,GO:0042736	NAD+ kinase activity|ATP binding|NADP biosynthetic process|NAD metabolic process|NADH kinase activity	ko00760	Nicotinate and nicotinamide metabolism
CSS0005259	2	0.724844	1.53226e-08	3.07701e-07	cinnamyl alcohol dehydrogenase	--	GO:0005829,GO:0007623,GO:0009409,GO:0009809,GO:0016491,GO:0016616,GO:0016621,GO:0050662	cytosol|circadian rhythm|response to cold|lignin biosynthetic process|oxidoreductase activity|oxidoreductase activity, acting on the CH-OH group of donors, NAD or NADP as acceptor|cinnamoyl-CoA reductase activity|coenzyme binding	--	--
CSS0039551	1	1.11235	1.74395e-10	4.17599e-09	PREDICTED: uncharacterized protein LOC105112273	--	GO:0009570,GO:0044183,GO:0061077	chloroplast stroma|protein binding involved in protein folding|chaperone-mediated protein folding	--	--
CSS0017196	1	1.06738	2.55887e-19	1.04096e-17	--	--	--	--	--	--
CSS0009029	1	0.912211	5.4544e-11	1.35289e-09	Copper-transporting ATPase	--	GO:0005507,GO:0005524,GO:0005774,GO:0016021,GO:0019829,GO:0030001	copper ion binding|ATP binding|vacuolar membrane|integral component of membrane|cation-transporting ATPase activity|metal ion transport	ko04016	MAPK signaling pathway - plant
CSS0044204	2	4.41939	0.000247058	0.00284731	hypothetical protein AQUCO_00900205v1, partial	--	GO:0000786,GO:0005634,GO:0006334,GO:0010369,GO:0031492,GO:0046982	nucleosome|nucleus|nucleosome assembly|chromocenter|nucleosomal DNA binding|protein heterodimerization activity	--	--
CSS0000388	2	0.889263	0.000176352	0.00208718	50S ribosomal protein	--	GO:0000027,GO:0003735,GO:0005840,GO:0006412,GO:0009507,GO:0019843	ribosomal large subunit assembly|structural constituent of ribosome|ribosome|translation|chloroplast|rRNA binding	ko03010	Ribosome
CSS0027671	1	1.17495	3.62554e-13	1.05701e-11	OTU domain-containing protein	--	--	--	--	--
CSS0016375	2	0.882919	1.7418e-11	4.48544e-10	Vesicle-associated membrane protein	--	GO:0000139,GO:0000149,GO:0005484,GO:0005773,GO:0005794,GO:0006887,GO:0006906,GO:0009651,GO:0015031,GO:0016021,GO:0031201	Golgi membrane|SNARE binding|SNAP receptor activity|vacuole|Golgi apparatus|exocytosis|vesicle fusion|response to salt stress|protein transport|integral component of membrane|SNARE complex	--	--
CSS0002201	2	0.75688	5.40827e-17	1.97294e-15	Calcium-binding protein	--	GO:0005509	calcium ion binding	ko04626	Plant-pathogen interaction
CSS0015519	1	1.1543	1.70819e-24	8.70903e-23	Glucan endo-1,3-beta-glucosidase	--	GO:0005576,GO:0005618,GO:0005634,GO:0005737,GO:0005975,GO:0006952,GO:0042973,GO:0046658,GO:0071555	extracellular region|cell wall|nucleus|cytoplasm|carbohydrate metabolic process|defense response|glucan endo-1,3-beta-D-glucosidase activity|anchored component of plasma membrane|cell wall organization	--	--
CSS0050139	2	0.83973	1.13302e-40	1.02407e-38	60S ribosomal protein like	--	GO:0000470,GO:0003723,GO:0003735,GO:0006412,GO:0022625	maturation of LSU-rRNA|RNA binding|structural constituent of ribosome|translation|cytosolic large ribosomal subunit	ko03010	Ribosome
CSS0023932	2	0.876486	1.12004e-10	2.71284e-09	hypothetical protein CEY00_Acc32115	--	--	--	--	--
CSS0014709	2	0.833035	2.02602e-05	0.000281068	Histone deacetylase	--	GO:0000118,GO:0004407,GO:0005634,GO:0005737,GO:0010187,GO:0032041,GO:0043565,GO:0045944,GO:0070822,GO:0070932,GO:0070933,GO:1900055,GO:1990619	histone deacetylase complex|histone deacetylase activity|nucleus|cytoplasm|negative regulation of seed germination|NAD-dependent histone deacetylase activity (H3-K14 specific)|sequence-specific DNA binding|positive regulation of transcription by RNA polymerase II|Sin3-type complex|histone H3 deacetylation|histone H4 deacetylation|regulation of leaf senescence|histone H3-K9 deacetylation	--	--
CSS0041849	2	0.751691	5.29186e-56	6.96279e-54	PREDICTED: uncharacterized protein LOC109011778	--	--	--	--	--
CSS0043677	1	0.882123	0	0	Pleiotropic drug resistance protein	--	GO:0005524,GO:0016021,GO:0016887	ATP binding|integral component of membrane|ATPase activity	--	--
CSS0022617	1	0.999136	7.92167e-25	4.09665e-23	Pleiotropic drug resistance protein	--	GO:0005524,GO:0016021,GO:0016887	ATP binding|integral component of membrane|ATPase activity	--	--
CSS0005169	1	1.01279	3.44965e-22	1.60788e-20	E3 ubiquitin-protein like	--	--	--	--	--
CSS0025337	2	2.3558	1.22609e-76	2.39183e-74	Stress-response A/B barrel domain-containing protein	--	GO:0009507,GO:0046872	chloroplast|metal ion binding	--	--
CSS0026506	2	0.660972	1.28022e-08	2.58835e-07	Histone deacetylase	C2H2	GO:0003676,GO:0005730,GO:0006325,GO:0016787,GO:0046872	nucleic acid binding|nucleolus|chromatin organization|hydrolase activity|metal ion binding	--	--
CSS0006897	1	0.984271	3.80653e-06	5.84397e-05	GABA transporter 1	--	GO:0003333,GO:0005886,GO:0015171,GO:0015185,GO:0015812,GO:0016021	amino acid transmembrane transport|plasma membrane|amino acid transmembrane transporter activity|gamma-aminobutyric acid transmembrane transporter activity|gamma-aminobutyric acid transport|integral component of membrane	--	--
CSS0048767	2	0.955768	2.24149e-05	0.000308839	Protein of unknown function DUF3128 protein	--	--	--	--	--
CSS0005615	1	1.12091	1.72951e-15	5.76504e-14	DDT domain-containing protein	--	GO:0005634,GO:0009707,GO:0009941,GO:0010019,GO:0016021,GO:0035064,GO:0045893,GO:0046872	nucleus|chloroplast outer membrane|chloroplast envelope|chloroplast-nucleus signaling pathway|integral component of membrane|methylated histone binding|positive regulation of transcription, DNA-templated|metal ion binding	--	--
CSS0019792	2	0.907502	5.2518e-29	3.21244e-27	RecQ-mediated genome instability protein	--	--	--	--	--
CSS0036278	1	1.23668	2.04667e-60	3.01481e-58	PREDICTED: cytochrome P450 87A3-like	--	GO:0004497,GO:0005506,GO:0007275,GO:0010268,GO:0016021,GO:0016125,GO:0016132,GO:0016705,GO:0020037,GO:0030659,GO:0055114	monooxygenase activity|iron ion binding|multicellular organism development|brassinosteroid homeostasis|integral component of membrane|sterol metabolic process|brassinosteroid biosynthetic process|oxidoreductase activity, acting on paired donors, with incorporation or reduction of molecular oxygen|heme binding|cytoplasmic vesicle membrane|oxidation-reduction process	--	--
CSS0026503	2	0.987765	8.45664e-07	1.40435e-05	copper/zinc-superoxide dismutase 1b	--	GO:0004784,GO:0009507,GO:0046872	superoxide dismutase activity|chloroplast|metal ion binding	ko04146	Peroxisome
CSS0003214	2	1.34018	4.67722e-08	8.91761e-07	cyclin-dependent kinases regulatory subunit	--	GO:0000278,GO:0000307,GO:0005737,GO:0007346,GO:0019005,GO:0019901,GO:0042023,GO:0042393,GO:0043130,GO:0045737,GO:0051301,GO:0051726,GO:0061575	mitotic cell cycle|cyclin-dependent protein kinase holoenzyme complex|cytoplasm|regulation of mitotic cell cycle|SCF ubiquitin ligase complex|protein kinase binding|DNA endoreduplication|histone binding|ubiquitin binding|positive regulation of cyclin-dependent protein serine/threonine kinase activity|cell division|regulation of cell cycle|cyclin-dependent protein serine/threonine kinase activator…	--	--
CSS0015373	1	0.958916	8.16043e-06	0.000119613	Glucuronoxylan glucuronosyltransferase	--	GO:0000139,GO:0005794,GO:0006486,GO:0009834,GO:0010417,GO:0015020,GO:0016021,GO:0071555	Golgi membrane|Golgi apparatus|protein glycosylation|plant-type secondary cell wall biogenesis|glucuronoxylan biosynthetic process|glucuronosyltransferase activity|integral component of membrane|cell wall organization	--	--
CSS0005897	2	0.912609	1.83579e-08	3.67048e-07	lactoylglutathione lyase isoform X1	--	GO:0004462,GO:0046872	lactoylglutathione lyase activity|metal ion binding	ko00620	Pyruvate metabolism
CSS0033043	1	1.2367	1.19217e-30	7.91515e-29	phosphate transporter protein 1, partial	--	GO:0005315,GO:0005634,GO:0005773,GO:0005794,GO:0005886,GO:0006817,GO:0009506,GO:0009737,GO:0015293,GO:0016020,GO:0016021	inorganic phosphate transmembrane transporter activity|nucleus|vacuole|Golgi apparatus|plasma membrane|phosphate ion transport|plasmodesma|response to abscisic acid|symporter activity|membrane|integral component of membrane	--	--
CSS0040476	2	0.941192	3.07163e-06	4.76933e-05	uncharacterized protein LOC18034376	--	--	--	--	--
CSS0040255	1	0.919134	0.000670787	0.00709176	Helicase protein	--	--	--	--	--
CSS0048550	2	0.897078	2.55911e-05	0.000348702	Exosome complex component RRP41-like	--	GO:0000176,GO:0000177,GO:0003723,GO:0005634,GO:0005730,GO:0005737,GO:0006364,GO:0008408,GO:0009845,GO:0016075,GO:0034427,GO:0034475,GO:0071028,GO:0071051,GO:0090351	nuclear exosome (RNase complex)|cytoplasmic exosome (RNase complex)|RNA binding|nucleus|nucleolus|cytoplasm|rRNA processing|3'-5' exonuclease activity|seed germination|rRNA catabolic process|nuclear-transcribed mRNA catabolic process, exonucleolytic, 3'-5'|U4 snRNA 3'-end processing|nuclear mRNA surveillance|polyadenylation-dependent snoRNA 3'-end processing|seedling development	ko03018	RNA degradation
CSS0046644	1	1.03456	2.65575e-05	0.000360897	Inactive protein kinase	--	--	--	--	--
CSS0038995	2	1.20921	4.93598e-234	4.37527e-231	aquaporin protein 11	--	GO:0005773,GO:0005886,GO:0009414,GO:0009506,GO:0015250,GO:0016021	vacuole|plasma membrane|response to water deprivation|plasmodesma|water channel activity|integral component of membrane	--	--
CSS0032624	2	0.94046	6.91924e-05	0.000881479	Protein transport protein Sec61 subunit beta like	--	GO:0005086,GO:0005784,GO:0005789,GO:0006616,GO:0016021,GO:0031204,GO:0031205	ARF guanyl-nucleotide exchange factor activity|Sec61 translocon complex|endoplasmic reticulum membrane|SRP-dependent cotranslational protein targeting to membrane, translocation|integral component of membrane|posttranslational protein targeting to membrane, translocation|endoplasmic reticulum Sec complex	ko03060,ko04141,ko04145	Protein export|Protein processing in endoplasmic reticulum|Phagosome
CSS0047819	1	0.996293	4.88081e-133	2.0049e-130	Seven transmembrane MLO family protein isoform 1	--	GO:0005516,GO:0005886,GO:0009817,GO:0016021	calmodulin binding|plasma membrane|defense response to fungus, incompatible interaction|integral component of membrane	--	--
CSS0034839	1	0.945512	8.04546e-05	0.0010127	Protein disulfide-isomerase	--	GO:0005623,GO:0045454	cell|cell redox homeostasis	--	--
CSS0006958	2	0.780316	3.98467e-27	2.26974e-25	ATP synthase subunit d, mitochondrial	--	GO:0000274,GO:0003735,GO:0005507,GO:0005730,GO:0005739,GO:0005753,GO:0005774,GO:0008270,GO:0009507,GO:0009535,GO:0009579,GO:0009651,GO:0015078,GO:0015986,GO:0016787,GO:0022626,GO:0042788,GO:0099132	mitochondrial proton-transporting ATP synthase, stator stalk|structural constituent of ribosome|copper ion binding|nucleolus|mitochondrion|mitochondrial proton-transporting ATP synthase complex|vacuolar membrane|zinc ion binding|chloroplast|chloroplast thylakoid membrane|thylakoid|response to salt stress|proton transmembrane transporter activity|ATP synthesis coupled proton transport|hydrolase ac…	ko00190	Oxidative phosphorylation
CSS0011121	1	2.24862	4.88593e-17	1.79015e-15	PREDICTED: LOB domain-containing protein 1-like	LOB	--	--	--	--
CSS0044527	1	0.915005	1.19728e-07	2.18307e-06	unnamed protein product, partial	--	GO:0000220,GO:0005768,GO:0005773,GO:0005794,GO:0005802,GO:0007035,GO:0012510,GO:0015991,GO:0016021,GO:0016471,GO:0046961,GO:0051117,GO:0070070	vacuolar proton-transporting V-type ATPase, V0 domain|endosome|vacuole|Golgi apparatus|trans-Golgi network|vacuolar acidification|trans-Golgi network transport vesicle membrane|ATP hydrolysis coupled proton transport|integral component of membrane|vacuolar proton-transporting V-type ATPase complex|proton-transporting ATPase activity, rotational mechanism|ATPase binding|proton-transporting V-type …	ko00190,ko04145	Oxidative phosphorylation|Phagosome
CSS0020936	1	0.93085	3.8505e-07	6.64208e-06	unnamed protein product, partial	--	GO:0000220,GO:0005768,GO:0005773,GO:0005794,GO:0005802,GO:0007035,GO:0012510,GO:0015991,GO:0016021,GO:0016471,GO:0046961,GO:0051117,GO:0070070	vacuolar proton-transporting V-type ATPase, V0 domain|endosome|vacuole|Golgi apparatus|trans-Golgi network|vacuolar acidification|trans-Golgi network transport vesicle membrane|ATP hydrolysis coupled proton transport|integral component of membrane|vacuolar proton-transporting V-type ATPase complex|proton-transporting ATPase activity, rotational mechanism|ATPase binding|proton-transporting V-type …	ko00190,ko04145	Oxidative phosphorylation|Phagosome
CSS0007930	2	0.991251	5.12322e-27	2.89866e-25	ascorbate peroxidase	--	GO:0005737,GO:0006979,GO:0016688,GO:0020037,GO:0042744,GO:0046872	cytoplasm|response to oxidative stress|L-ascorbate peroxidase activity|heme binding|hydrogen peroxide catabolic process|metal ion binding	ko00053,ko00480	Ascorbate and aldarate metabolism|Glutathione metabolism
CSS0023988	1	0.828883	1.34452e-34	1.02771e-32	General negative regulator of transcription C16C9.04c like	--	GO:0000289,GO:0003723,GO:0004842,GO:0005634,GO:0005829,GO:0010629,GO:0016567,GO:0030014,GO:0030015,GO:0046872,GO:0061630,GO:0070647	nuclear-transcribed mRNA poly(A) tail shortening|RNA binding|ubiquitin-protein transferase activity|nucleus|cytosol|negative regulation of gene expression|protein ubiquitination|CCR4-NOT complex|CCR4-NOT core complex|metal ion binding|ubiquitin protein ligase activity|protein modification by small protein conjugation or removal	ko03018	RNA degradation
CSS0047546	1	0.788148	2.57668e-27	1.48108e-25	ribosomal protein subunit L5 (mitochondrion)	--	GO:0000027,GO:0003735,GO:0005739,GO:0006412,GO:0022625	ribosomal large subunit assembly|structural constituent of ribosome|mitochondrion|translation|cytosolic large ribosomal subunit	--	--
CSS0048730	1	1.00443	7.34246e-06	0.00010839	Calcium-transporting ATPase 1, endoplasmic reticulum-type like	--	GO:0005388,GO:0005524,GO:0005774,GO:0005783,GO:0005789,GO:0005886,GO:0006816,GO:0008553,GO:0010042,GO:0030176,GO:0046686,GO:0046872	calcium-transporting ATPase activity|ATP binding|vacuolar membrane|endoplasmic reticulum|endoplasmic reticulum membrane|plasma membrane|calcium ion transport|proton-exporting ATPase activity, phosphorylative mechanism|response to manganese ion|integral component of endoplasmic reticulum membrane|response to cadmium ion|metal ion binding	--	--
CSS0050012	2	0.726679	1.60843e-17	6.03758e-16	60S ribosomal protein L35	--	GO:0003735,GO:0005840,GO:0006412	structural constituent of ribosome|ribosome|translation	ko03010	Ribosome
CSS0006794	2	1.1601	1.98794e-10	4.74449e-09	aquaporin protein 6	--	GO:0005774,GO:0015204,GO:0015250,GO:0016021	vacuolar membrane|urea transmembrane transporter activity|water channel activity|integral component of membrane	--	--
CSS0042488	2	0.834983	4.02809e-05	0.000532633	Tetratricopeptide repeat protein like	--	--	--	--	--
CSS0044414	2	0.753975	2.37514e-18	9.28825e-17	Ras-related protein like	--	GO:0000139,GO:0003924,GO:0005525,GO:0005773,GO:0005774,GO:0005886,GO:0006886,GO:0006904,GO:0009306,GO:0009873,GO:0017157,GO:0032482	Golgi membrane|GTPase activity|GTP binding|vacuole|vacuolar membrane|plasma membrane|intracellular protein transport|vesicle docking involved in exocytosis|protein secretion|ethylene-activated signaling pathway|regulation of exocytosis|Rab protein signal transduction	ko04144	Endocytosis
CSS0031346	2	0.826853	4.76096e-16	1.65666e-14	40S ribosomal protein S15a	--	GO:0003735,GO:0005840,GO:0006412	structural constituent of ribosome|ribosome|translation	ko03010	Ribosome
CSS0009812	2	0.845529	2.03499e-19	8.33206e-18	Ras-related protein like	--	GO:0000139,GO:0003924,GO:0005525,GO:0005773,GO:0005774,GO:0005886,GO:0006886,GO:0006904,GO:0009306,GO:0009873,GO:0017157,GO:0032482	Golgi membrane|GTPase activity|GTP binding|vacuole|vacuolar membrane|plasma membrane|intracellular protein transport|vesicle docking involved in exocytosis|protein secretion|ethylene-activated signaling pathway|regulation of exocytosis|Rab protein signal transduction	ko04144	Endocytosis
CSS0031573	2	3.61048	3.93834e-44	3.92474e-42	hypothetical protein VITISV_009336	--	GO:0000786,GO:0003677,GO:0005634,GO:0046982	nucleosome|DNA binding|nucleus|protein heterodimerization activity	--	--
CSS0031426	2	0.866683	1.28803e-06	2.09792e-05	Actin-depolymerizing factor 2 like, partial	--	GO:0003779,GO:0015629,GO:0030042	actin binding|actin cytoskeleton|actin filament depolymerization	--	--
CSS0018018	2	0.666311	1.05543e-12	2.98409e-11	PREDICTED: THO complex subunit 4A	--	GO:0003723,GO:0005654,GO:0005730,GO:0051028	RNA binding|nucleoplasm|nucleolus|mRNA transport	ko03013,ko03015,ko03040	RNA transport|mRNA surveillance pathway|Spliceosome
CSS0022593	1	0.990782	1.41263e-05	0.000200656	SCO-spondin like	--	--	--	--	--
CSS0043051	1	0.918714	4.2755e-08	8.19187e-07	Sec14 cytosolic factor like	--	GO:0000139,GO:0005886,GO:0015031	Golgi membrane|plasma membrane|protein transport	--	--
CSS0018575	1	1.01387	0.000120315	0.00146834	uncharacterized protein LOC111985991	--	--	--	--	--
CSS0026029	1	0.87166	7.59725e-21	3.31764e-19	PREDICTED: LOW QUALITY PROTEIN: uncharacterized protein LOC107858555, partial	--	GO:0009523,GO:0009535,GO:0015979,GO:0016021,GO:0042301,GO:0050821	photosystem II|chloroplast thylakoid membrane|photosynthesis|integral component of membrane|phosphate ion binding|protein stabilization	ko00195	Photosynthesis
CSS0006003	1	0.95382	4.23104e-17	1.55585e-15	E3 ubiquitin-protein ligase XBAT31	--	GO:0016567,GO:0016740,GO:0046872	protein ubiquitination|transferase activity|metal ion binding	--	--
CSS0033668	2	0.88816	2.07187e-13	6.15771e-12	Palmdelphin like	--	--	--	ko03018	RNA degradation
CSS0034107	2	0.956777	2.93053e-05	0.000395261	Glucan endo-1,3-beta-glucosidase btgC	--	--	--	--	--
CSS0005404	2	0.898772	0.000410547	0.00455687	PREDICTED: eukaryotic translation initiation factor 3 subunit G-B	--	GO:0001732,GO:0003743,GO:0016282,GO:0033290,GO:0071540,GO:0071541	formation of cytoplasmic translation initiation complex|translation initiation factor activity|eukaryotic 43S preinitiation complex|eukaryotic 48S preinitiation complex|eukaryotic translation initiation factor 3 complex, eIF3e|eukaryotic translation initiation factor 3 complex, eIF3m	ko03013	RNA transport
CSS0002992	2	0.866545	1.32823e-27	7.72255e-26	Transcription elongation factor B polypeptide 1	--	GO:0005634,GO:0005829,GO:0006511,GO:0016567,GO:0032968,GO:0034243,GO:0070449	nucleus|cytosol|ubiquitin-dependent protein catabolic process|protein ubiquitination|positive regulation of transcription elongation from RNA polymerase II promoter|regulation of transcription elongation from RNA polymerase II promoter|elongin complex	ko04120	Ubiquitin mediated proteolysis
CSS0044115	2	1.00258	3.53637e-19	1.43054e-17	Endochitinase	--	--	--	--	--
CSS0002730	2	2.23042	2.70817e-30	1.76101e-28	small heat shock protein 17.2	--	GO:0005737	cytoplasm	ko04141	Protein processing in endoplasmic reticulum
CSS0046007	2	2.97616	9.46862e-65	1.49501e-62	cytosolic class I small heat shock protein 3B, partial	--	GO:0005737	cytoplasm	ko04141	Protein processing in endoplasmic reticulum
CSS0036446	2	1.51332	1.39842e-74	2.64627e-72	small heat shock protein 17.2	--	GO:0005737	cytoplasm	ko04141	Protein processing in endoplasmic reticulum
CSS0024196	2	2.93214	2.74003e-05	0.000371351	small heat shock protein 17.2	--	GO:0005737	cytoplasm	ko04141	Protein processing in endoplasmic reticulum
CSS0034421	2	3.84332	7.07437e-25	3.67506e-23	small heat shock protein 17.2	--	GO:0005737	cytoplasm	ko04141	Protein processing in endoplasmic reticulum
CSS0026780	1	0.967925	0.000182664	0.0021508	Neutral ceramidase	--	GO:0005576,GO:0005774,GO:0005783,GO:0005794,GO:0006665,GO:0017040,GO:0034599,GO:0090156,GO:0102121	extracellular region|vacuolar membrane|endoplasmic reticulum|Golgi apparatus|sphingolipid metabolic process|N-acylsphingosine amidohydrolase activity|cellular response to oxidative stress|cellular sphingolipid homeostasis|ceramidase activity	ko00600	Sphingolipid metabolism
CSS0014722	2	0.932426	5.01576e-89	1.2302e-86	4-hydroxy-tetrahydrodipicolinate synthase	--	--	--	--	--
CSS0018492	2	0.892912	0.000638003	0.00677778	zinc finger CCCH domain-containing protein 49-like	--	GO:0000387,GO:0000974,GO:0003677,GO:0017070,GO:0036002,GO:0046872,GO:0071006,GO:0071007	spliceosomal snRNP assembly|Prp19 complex|DNA binding|U6 snRNA binding|pre-mRNA binding|metal ion binding|U2-type catalytic step 1 spliceosome|U2-type catalytic step 2 spliceosome	ko03040	Spliceosome
CSS0017433	2	0.618007	4.29532e-80	8.858e-78	Pleckstriny domain-containing protein	--	GO:0001881,GO:0005769,GO:0005802,GO:0005829,GO:0007032,GO:0032266,GO:0042147,GO:0055037	receptor recycling|early endosome|trans-Golgi network|cytosol|endosome organization|phosphatidylinositol-3-phosphate binding|retrograde transport, endosome to Golgi|recycling endosome	--	--
CSS0027070	2	1.11052	2.50497e-41	2.34193e-39	RING finger protein	--	GO:0004842,GO:0005829,GO:0006511,GO:0009651,GO:0009737,GO:0009789,GO:0046872,GO:0061630	ubiquitin-protein transferase activity|cytosol|ubiquitin-dependent protein catabolic process|response to salt stress|response to abscisic acid|positive regulation of abscisic acid-activated signaling pathway|metal ion binding|ubiquitin protein ligase activity	--	--
CSS0020258	2	1.69375	5.30937e-05	0.000688718	RING finger protein	--	GO:0004842,GO:0005829,GO:0006511,GO:0009651,GO:0009737,GO:0009789,GO:0046872,GO:0061630	ubiquitin-protein transferase activity|cytosol|ubiquitin-dependent protein catabolic process|response to salt stress|response to abscisic acid|positive regulation of abscisic acid-activated signaling pathway|metal ion binding|ubiquitin protein ligase activity	--	--
CSS0043126	2	0.769178	1.41656e-43	1.39244e-41	cyclophilin	--	GO:0003755,GO:0005576,GO:0005768,GO:0005771,GO:0005783,GO:0005795,GO:0005802,GO:0005829,GO:0005886,GO:0006457,GO:0009506,GO:0009507,GO:0016020,GO:0048364,GO:0051082	peptidyl-prolyl cis-trans isomerase activity|extracellular region|endosome|multivesicular body|endoplasmic reticulum|Golgi stack|trans-Golgi network|cytosol|plasma membrane|protein folding|plasmodesma|chloroplast|membrane|root development|unfolded protein binding	--	--
CSS0041888	2	0.976037	0.000897005	0.00922287	cyclophilin	--	GO:0003755,GO:0005576,GO:0005768,GO:0005771,GO:0005783,GO:0005795,GO:0005802,GO:0005829,GO:0005886,GO:0006457,GO:0009506,GO:0009507,GO:0016020,GO:0048364,GO:0051082	peptidyl-prolyl cis-trans isomerase activity|extracellular region|endosome|multivesicular body|endoplasmic reticulum|Golgi stack|trans-Golgi network|cytosol|plasma membrane|protein folding|plasmodesma|chloroplast|membrane|root development|unfolded protein binding	--	--
CSS0012573	1	0.909559	1.66297e-10	3.98584e-09	U-box domain-containing protein	--	GO:0004842,GO:0005634,GO:0005737,GO:0005886,GO:0010115,GO:0010150,GO:0010271,GO:0010380,GO:0070696,GO:0090359	ubiquitin-protein transferase activity|nucleus|cytoplasm|plasma membrane|regulation of abscisic acid biosynthetic process|leaf senescence|regulation of chlorophyll catabolic process|regulation of chlorophyll biosynthetic process|transmembrane receptor protein serine/threonine kinase binding|negative regulation of abscisic acid biosynthetic process	--	--
CSS0001488	1	1.09272	2.33574e-12	6.44882e-11	PREDICTED: protein PSY3 isoform X2	--	--	--	--	--
CSS0014908	1	0.977674	7.67153e-10	1.74596e-08	Inactive receptor-like protein kinase	--	GO:0004674,GO:0005524,GO:0012505,GO:0016021,GO:0048765,GO:0090406	protein serine/threonine kinase activity|ATP binding|endomembrane system|integral component of membrane|root hair cell differentiation|pollen tube	--	--
CSS0026424	1	2.20472	2.84017e-13	8.33814e-12	PREDICTED: LOB domain-containing protein 12	LOB	GO:0003677,GO:0009965,GO:0010016	DNA binding|leaf morphogenesis|shoot system morphogenesis	--	--
CSS0022185	1	1.68346	7.56273e-54	9.43473e-52	Cytochrome P450 81E8 like	--	GO:0004497,GO:0005506,GO:0016021,GO:0016705,GO:0020037	monooxygenase activity|iron ion binding|integral component of membrane|oxidoreductase activity, acting on paired donors, with incorporation or reduction of molecular oxygen|heme binding	--	--
CSS0049182	1	1.17771	6.28874e-10	1.44749e-08	Cytochrome P450 81E8 like	--	GO:0004497,GO:0005506,GO:0016021,GO:0016705,GO:0020037	monooxygenase activity|iron ion binding|integral component of membrane|oxidoreductase activity, acting on paired donors, with incorporation or reduction of molecular oxygen|heme binding	--	--
CSS0022577	1	1.84533	1.25081e-71	2.28149e-69	Cytochrome P450 81E8 like	--	GO:0004497,GO:0005506,GO:0016021,GO:0016705,GO:0020037	monooxygenase activity|iron ion binding|integral component of membrane|oxidoreductase activity, acting on paired donors, with incorporation or reduction of molecular oxygen|heme binding	--	--
CSS0003962	2	1.81908	0.00011972	0.00146249	PREDICTED: probable glutathione S-transferase parC	--	GO:0004364,GO:0009734	glutathione transferase activity|auxin-activated signaling pathway	ko00480	Glutathione metabolism
CSS0002506	2	0.679701	5.94901e-07	1.00661e-05	cinnamate 4-hydroxylase	--	GO:0004497,GO:0005506,GO:0016705,GO:0020037	monooxygenase activity|iron ion binding|oxidoreductase activity, acting on paired donors, with incorporation or reduction of molecular oxygen|heme binding	--	--
CSS0016571	2	0.446031	5.34032e-49	5.996e-47	PREDICTED: ubiquitin-conjugating enzyme E2-17 kDa	--	GO:0005524,GO:0061631	ATP binding|ubiquitin conjugating enzyme activity	--	--
CSS0000355	2	1.3073	0.000245894	0.00283583	Root phototropism protein	--	GO:0005634,GO:0005737,GO:0007165,GO:0009638,GO:0016567	nucleus|cytoplasm|signal transduction|phototropism|protein ubiquitination	--	--
CSS0028467	1	0.9731	3.63172e-17	1.33839e-15	LRR receptor-like serine/threonine-protein kinase	--	--	--	--	--
CSS0005992	2	0.816578	2.2782e-29	1.42106e-27	Ycf54-like protein	--	GO:0009507	chloroplast	--	--
CSS0012262	2	0.950793	1.25049e-06	2.04072e-05	50S ribosomal protein	--	GO:0003735,GO:0005840,GO:0006412,GO:0009507,GO:0019843	structural constituent of ribosome|ribosome|translation|chloroplast|rRNA binding	ko03010	Ribosome
CSS0034718	2	0.940621	0.000487963	0.00534106	Bifunctional bis(5'-adenosyl)-triphosphatase/adenylylsulfatase	--	GO:0000166,GO:0005829,GO:0043530,GO:0047627,GO:0047710	nucleotide binding|cytosol|adenosine 5'-monophosphoramidase activity|adenylylsulfatase activity|bis(5'-adenosyl)-triphosphatase activity	ko00230	Purine metabolism
CSS0023896	2	1.34614	1.06028e-50	1.22587e-48	CBS domain-containing protein	--	GO:0005739,GO:0009651,GO:0045454,GO:0050897	mitochondrion|response to salt stress|cell redox homeostasis|cobalt ion binding	--	--
CSS0026104	1	0.945664	0.000940618	0.00963404	Cytochrome b561 and DOMON domain-containing protein	--	GO:0016021,GO:0046872,GO:0055114	integral component of membrane|metal ion binding|oxidation-reduction process	--	--
CSS0047337	2	0.704127	6.17561e-20	2.60889e-18	60S ribosomal protein like, partial	--	GO:0000027,GO:0003735,GO:0005634,GO:0005730,GO:0005737,GO:0005773,GO:0005829,GO:0005886,GO:0006412,GO:0006913,GO:0008097,GO:0008283,GO:0009507,GO:0009735,GO:0009955,GO:0009965,GO:0010015,GO:0016020,GO:0022625,GO:0022626,GO:0042788	ribosomal large subunit assembly|structural constituent of ribosome|nucleus|nucleolus|cytoplasm|vacuole|cytosol|plasma membrane|translation|nucleocytoplasmic transport|5S rRNA binding|cell proliferation|chloroplast|response to cytokinin|adaxial/abaxial pattern specification|leaf morphogenesis|root morphogenesis|membrane|cytosolic large ribosomal subunit|cytosolic ribosome|polysomal ribosome	ko03010	Ribosome
CSS0002875	2	0.865922	2.59673e-16	9.15561e-15	S-like ribonuclease	--	GO:0003723,GO:0004521,GO:0005576,GO:0005622,GO:0005773,GO:0005783,GO:0006401,GO:0010168,GO:0010507,GO:0016075,GO:0033897	RNA binding|endoribonuclease activity|extracellular region|intracellular|vacuole|endoplasmic reticulum|RNA catabolic process|ER body|negative regulation of autophagy|rRNA catabolic process|ribonuclease T2 activity	--	--
CSS0016484	1	1.39425	0.000439449	0.00485315	hypothetical protein POPTR_014G176300v3	--	--	--	--	--
CSS0032607	2	0.966833	0.000378267	0.0042255	uncharacterized protein LOC107427713	--	--	--	--	--
CSS0047610	1	1.27181	3.21552e-23	1.56066e-21	Cytochrome b561 and DOMON domain-containing protein	--	GO:0016021,GO:0046872,GO:0055114	integral component of membrane|metal ion binding|oxidation-reduction process	--	--
CSS0037357	2	0.502639	1.21133e-21	5.49886e-20	60S ribosomal protein like	--	GO:0003735,GO:0005730,GO:0005829,GO:0006412,GO:0022625,GO:0022626,GO:0042788	structural constituent of ribosome|nucleolus|cytosol|translation|cytosolic large ribosomal subunit|cytosolic ribosome|polysomal ribosome	--	--
CSS0006971	1	1.27181	2.60603e-23	1.26727e-21	Serine/threonine-protein kinase	--	GO:0004672,GO:0004674,GO:0005524,GO:0005634,GO:0005737,GO:0005886,GO:0006468,GO:0006952,GO:0006979,GO:0009611,GO:0016301,GO:0019901	protein kinase activity|protein serine/threonine kinase activity|ATP binding|nucleus|cytoplasm|plasma membrane|protein phosphorylation|defense response|response to oxidative stress|response to wounding|kinase activity|protein kinase binding	ko04016	MAPK signaling pathway - plant
CSS0033787	2	0.696364	4.43523e-05	0.000582657	Peptidyl-prolyl cis-trans isomerase	--	GO:0000413,GO:0003755,GO:0005516,GO:0005528,GO:0005634,GO:0005737,GO:0005773,GO:0061077,GO:0070370	protein peptidyl-prolyl isomerization|peptidyl-prolyl cis-trans isomerase activity|calmodulin binding|FK506 binding|nucleus|cytoplasm|vacuole|chaperone-mediated protein folding|cellular heat acclimation	--	--
CSS0031112	2	0.938151	4.10144e-05	0.000541624	PREDICTED: putative quinone-oxidoreductase homolog, chloroplastic	--	GO:0005773,GO:0005886,GO:0009507,GO:0009535,GO:0009706,GO:0009941,GO:0016491	vacuole|plasma membrane|chloroplast|chloroplast thylakoid membrane|chloroplast inner membrane|chloroplast envelope|oxidoreductase activity	--	--
CSS0036198	1	0.990968	5.91885e-08	1.11544e-06	Protein stum like	--	--	--	--	--
CSS0003899	2	0.899496	2.55465e-09	5.54202e-08	hypothetical protein POPTR_003G102900v3	--	GO:0003677,GO:0003899,GO:0005634,GO:0006351,GO:0008270	DNA binding|DNA-directed 5'-3' RNA polymerase activity|nucleus|transcription, DNA-templated|zinc ion binding	--	--
CSS0005528	2	0.960915	1.94757e-07	3.48199e-06	E3 ubiquitin-protein like	--	GO:0003676,GO:0004386,GO:0005524,GO:0005634,GO:0006325,GO:0008270	nucleic acid binding|helicase activity|ATP binding|nucleus|chromatin organization|zinc ion binding	--	--
CSS0005639	2	0.938654	0.000210529	0.00245658	E3 ubiquitin-protein ligase LUL4	--	--	--	--	--
CSS0009983	2	0.838852	2.75432e-195	1.85549e-192	cytochrome b5	--	GO:0005789,GO:0016021,GO:0020037,GO:0031090,GO:0046872,GO:0055114	endoplasmic reticulum membrane|integral component of membrane|heme binding|organelle membrane|metal ion binding|oxidation-reduction process	--	--
CSS0005490	2	0.892762	4.2126e-05	0.000556003	Transcriptional corepressor like	--	GO:0001666,GO:0003713,GO:0005634,GO:0006355,GO:0006974,GO:0006979,GO:0009414,GO:0009611,GO:0009617,GO:0009620,GO:0009624,GO:0009733,GO:0009793,GO:0009827,GO:0009908,GO:0009909,GO:0009944,GO:0010044,GO:0010073,GO:0010192,GO:0010272,GO:0010393,GO:0030154,GO:0045892,GO:0045893,GO:0045995,GO:0046898,GO:0047484,GO:0048358,GO:0048359,GO:0071217,GO:0080001,GO:1901001,GO:1902066,GO:1902074,GO:1902183,GO:…	response to hypoxia|transcription coactivator activity|nucleus|regulation of transcription, DNA-templated|cellular response to DNA damage stimulus|response to oxidative stress|response to water deprivation|response to wounding|response to bacterium|response to fungus|response to nematode|response to auxin|embryo development ending in seed dormancy|plant-type cell wall modification|flower developm…	--	--
CSS0032503	2	0.988653	3.75387e-08	7.23081e-07	hypothetical protein CUMW_049680	--	GO:0009507,GO:0009535,GO:0009579,GO:0010287	chloroplast|chloroplast thylakoid membrane|thylakoid|plastoglobule	--	--
CSS0037248	2	0.545951	1.90199e-68	3.22477e-66	vesicle-associated membrane protein 721-like	--	GO:0000149,GO:0005484,GO:0005768,GO:0005886,GO:0006887,GO:0006906,GO:0015031,GO:0016021,GO:0031201,GO:0031901	SNARE binding|SNAP receptor activity|endosome|plasma membrane|exocytosis|vesicle fusion|protein transport|integral component of membrane|SNARE complex|early endosome membrane	--	--
CSS0013378	2	0.971483	0.000436994	0.00482815	pantoate--beta-alanine ligase	--	GO:0004592,GO:0005524,GO:0005737,GO:0015940	pantoate-beta-alanine ligase activity|ATP binding|cytoplasm|pantothenate biosynthetic process	ko00410,ko00770	beta-Alanine metabolism|Pantothenate and CoA biosynthesis
CSS0034388	1	0.943804	9.39379e-13	2.67091e-11	Myosin-6 like, partial	--	GO:0003774,GO:0003779,GO:0005516,GO:0005524,GO:0005737,GO:0007015,GO:0016459	motor activity|actin binding|calmodulin binding|ATP binding|cytoplasm|actin filament organization|myosin complex	--	--
CSS0040159	2	0.916482	4.24562e-07	7.27645e-06	alcohol dehydrogenase	--	GO:0004022,GO:0005737,GO:0006069,GO:0008270,GO:0051903	alcohol dehydrogenase (NAD) activity|cytoplasm|ethanol oxidation|zinc ion binding|S-(hydroxymethyl)glutathione dehydrogenase activity	ko00010,ko00071,ko00350	Glycolysis / Gluconeogenesis|Fatty acid degradation|Tyrosine metabolism
CSS0025322	1	0.972966	4.91688e-11	1.22331e-09	DENN domain-containing protein	--	--	--	--	--
CSS0011455	2	1.02204	0.000495217	0.00541108	MDIS1-interacting receptor like kinase	--	--	--	ko00730	Thiamine metabolism
CSS0004045	2	0.858497	7.24359e-11	1.78094e-09	PREDICTED: mitochondrial import receptor subunit TOM9-2	--	GO:0005739,GO:0005742,GO:0005774,GO:0006626,GO:0009536,GO:0015450,GO:0016021	mitochondrion|mitochondrial outer membrane translocase complex|vacuolar membrane|protein targeting to mitochondrion|plastid|P-P-bond-hydrolysis-driven protein transmembrane transporter activity|integral component of membrane	--	--
CSS0015227	2	0.935128	6.09943e-09	1.27926e-07	H/ACA ribonucleoprotein complex subunit 3-like protein	--	GO:0005730,GO:0010197,GO:0015030,GO:0031118,GO:0031120,GO:0031429,GO:0034513,GO:0070034,GO:0090661	nucleolus|polar nucleus fusion|Cajal body|rRNA pseudouridine synthesis|snRNA pseudouridine synthesis|box H/ACA snoRNP complex|box H/ACA snoRNA binding|telomerase RNA binding|box H/ACA telomerase RNP complex	ko03008	Ribosome biogenesis in eukaryotes
CSS0015006	2	0.910182	1.20802e-07	2.20186e-06	uncharacterized protein LOC110757517	--	--	--	--	--
CSS0030465	2	2.00028	1.0099e-12	2.85856e-11	Myb-related protein like	MYB	GO:0003700,GO:0005634,GO:0009409,GO:0009651,GO:0009723,GO:0009733,GO:0009751,GO:0009753,GO:0030154,GO:0043565,GO:0044212,GO:0045893,GO:0050826	DNA-binding transcription factor activity|nucleus|response to cold|response to salt stress|response to ethylene|response to auxin|response to salicylic acid|response to jasmonic acid|cell differentiation|sequence-specific DNA binding|transcription regulatory region DNA binding|positive regulation of transcription, DNA-templated|response to freezing	--	--
CSS0046589	1	0.893094	7.23942e-05	0.000918333	E3 ubiquitin protein like	--	GO:0004842,GO:0009414,GO:0016567,GO:0046872,GO:0051865	ubiquitin-protein transferase activity|response to water deprivation|protein ubiquitination|metal ion binding|protein autoubiquitination	--	--
CSS0011315	1	0.888889	2.76511e-10	6.54059e-09	Galacturonosyltransferase	--	GO:0000139,GO:0016021,GO:0045489,GO:0047262,GO:0071555	Golgi membrane|integral component of membrane|pectin biosynthetic process|polygalacturonate 4-alpha-galacturonosyltransferase activity|cell wall organization	ko00520	Amino sugar and nucleotide sugar metabolism
CSS0002873	2	1.01825	2.73121e-06	4.26567e-05	Photosystem II reaction center W protein	--	GO:0009523,GO:0009535,GO:0015979,GO:0016021,GO:0042549	photosystem II|chloroplast thylakoid membrane|photosynthesis|integral component of membrane|photosystem II stabilization	ko00195	Photosynthesis
CSS0040042	2	0.870254	1.94632e-17	7.28429e-16	V-type proton ATPase subunit F	--	GO:0005773,GO:0005774,GO:0005794,GO:0005886,GO:0015991,GO:0016020,GO:0033180,GO:0042625,GO:0046961	vacuole|vacuolar membrane|Golgi apparatus|plasma membrane|ATP hydrolysis coupled proton transport|membrane|proton-transporting V-type ATPase, V1 domain|ATPase coupled ion transmembrane transporter activity|proton-transporting ATPase activity, rotational mechanism	ko00190,ko04145	Oxidative phosphorylation|Phagosome
CSS0002291	2	1.98413	0.000152986	0.00182907	Histone H2A variant like	--	GO:0000786,GO:0000790,GO:0003677,GO:0006325,GO:0046982	nucleosome|nuclear chromatin|DNA binding|chromatin organization|protein heterodimerization activity	--	--
CSS0010037	1	1.08203	2.23111e-15	7.40165e-14	ATPase E1-E2 type family protein / haloacid dehalogenase-like hydrolase family protein	--	GO:0005388,GO:0005516,GO:0005524,GO:0005887,GO:0046872	calcium-transporting ATPase activity|calmodulin binding|ATP binding|integral component of plasma membrane|metal ion binding	--	--
CSS0032745	1	0.984768	1.15764e-16	4.15115e-15	protein SPIRRIG	--	GO:0000932,GO:0005737,GO:0007033,GO:0009737,GO:0009825,GO:0010090,GO:0033962,GO:0071472,GO:0080001,GO:1903335,GO:1904580	P-body|cytoplasm|vacuole organization|response to abscisic acid|multidimensional cell growth|trichome morphogenesis|cytoplasmic mRNA processing body assembly|cellular response to salt stress|mucilage extrusion from seed coat|regulation of vacuolar transport|regulation of intracellular mRNA localization	--	--
CSS0037535	2	1.22842	1.6907e-05	0.000236819	Heat stress transcription factor A-6b like	HSF	GO:0000978,GO:0003700,GO:0005634,GO:0005737,GO:0034605,GO:0043565,GO:0061408	RNA polymerase II proximal promoter sequence-specific DNA binding|DNA-binding transcription factor activity|nucleus|cytoplasm|cellular response to heat|sequence-specific DNA binding|positive regulation of transcription from RNA polymerase II promoter in response to heat stress	--	--
CSS0043004	2	0.86773	2.29141e-16	8.09604e-15	Heat shock 22 protein	--	--	--	--	--
CSS0013604	2	0.835758	2.5561e-14	8.05157e-13	N-terminal acetyltransferase B complex catalytic subunit NAA20	--	GO:0004596,GO:0017196,GO:0031416	peptide alpha-N-acetyltransferase activity|N-terminal peptidyl-methionine acetylation|NatB complex	--	--
CSS0035543	2	0.976926	6.1821e-05	0.000794179	Cyclin-P3-1 like	--	GO:0000079,GO:0007049,GO:0019901,GO:0051301	regulation of cyclin-dependent protein serine/threonine kinase activity|cell cycle|protein kinase binding|cell division	--	--
CSS0013311	2	0.895215	1.27057e-05	0.000181497	Pentatricopeptide repeat-containing protein	--	--	--	--	--
CSS0048356	2	0.896505	7.6226e-09	1.58035e-07	PREDICTED: small nuclear ribonucleoprotein Sm D1-like	--	GO:0000387,GO:0003729,GO:0005730,GO:0005774,GO:0008380,GO:0016020,GO:0016607,GO:0035194,GO:0043484	spliceosomal snRNP assembly|mRNA binding|nucleolus|vacuolar membrane|RNA splicing|membrane|nuclear speck|posttranscriptional gene silencing by RNA|regulation of RNA splicing	ko03040	Spliceosome
CSS0030822	1	0.917672	3.68862e-06	5.67156e-05	Dual specificity phosphatase	--	GO:0004484,GO:0005525,GO:0005634,GO:0006370,GO:0009452,GO:0031533	mRNA guanylyltransferase activity|GTP binding|nucleus|7-methylguanosine mRNA capping|7-methylguanosine RNA capping|mRNA cap methyltransferase complex	--	--
CSS0027342	2	1.23273	2.01496e-18	7.90419e-17	Phenazine biosynthesis PhzF protein	--	GO:0009058,GO:0016853,GO:0030968	biosynthetic process|isomerase activity|endoplasmic reticulum unfolded protein response	--	--
CSS0004201	2	0.969667	6.76799e-23	3.2505e-21	Phenazine biosynthesis PhzF protein	--	GO:0009058,GO:0016853,GO:0030968	biosynthetic process|isomerase activity|endoplasmic reticulum unfolded protein response	--	--
CSS0040014	2	0.883784	9.5518e-05	0.00118547	R3H domain-containing protein	--	--	--	--	--
CSS0042185	2	0.871483	1.83245e-07	3.28431e-06	Bromodomain-containing protein	--	--	--	--	--
CSS0018981	2	0.722848	8.51818e-21	3.71659e-19	Glutathione peroxidase	--	GO:0004602,GO:0005783,GO:0005886,GO:0006979,GO:0009793,GO:0012505	glutathione peroxidase activity|endoplasmic reticulum|plasma membrane|response to oxidative stress|embryo development ending in seed dormancy|endomembrane system	ko00480,ko00590	Glutathione metabolism|Arachidonic acid metabolism
CSS0021253	1	0.891854	1.38722e-05	0.000197156	Mediator of RNA polymerase II transcription subunit 33A like	--	GO:0009698,GO:0016592,GO:2000762	phenylpropanoid metabolic process|mediator complex|regulation of phenylpropanoid metabolic process	--	--
CSS0042953	1	1.14569	2.99765e-26	1.65165e-24	Core-capsid bridging protein	--	GO:0003729,GO:0006402,GO:0010228,GO:0032451,GO:0046872,GO:0051213,GO:0080167,GO:1990931	mRNA binding|mRNA catabolic process|vegetative to reproductive phase transition of meristem|demethylase activity|metal ion binding|dioxygenase activity|response to karrikin|RNA N6-methyladenosine dioxygenase activity	--	--
CSS0008061	1	0.942921	2.187e-05	0.000301908	LRR receptor-like serine/threonine-protein kinase	--	--	--	--	--
CSS0018354	1	1.04153	3.43318e-12	9.3309e-11	DDT domain-containing protein	--	GO:0005634,GO:0009707,GO:0009941,GO:0010019,GO:0016021,GO:0035064,GO:0045893,GO:0046872	nucleus|chloroplast outer membrane|chloroplast envelope|chloroplast-nucleus signaling pathway|integral component of membrane|methylated histone binding|positive regulation of transcription, DNA-templated|metal ion binding	--	--
CSS0015379	2	1.03104	0.000589831	0.00631917	Serine--glyoxylate aminotransferase	--	GO:0004760,GO:0005777,GO:0005886,GO:0008453,GO:0009507,GO:0009570,GO:0009853,GO:0016020,GO:0019265,GO:0048046,GO:0050281	serine-pyruvate transaminase activity|peroxisome|plasma membrane|alanine-glyoxylate transaminase activity|chloroplast|chloroplast stroma|photorespiration|membrane|glycine biosynthetic process, by transamination of glyoxylate|apoplast|serine-glyoxylate transaminase activity	ko00250,ko00260,ko00630,ko04146	Alanine, aspartate and glutamate metabolism|Glycine, serine and threonine metabolism|Glyoxylate and dicarboxylate metabolism|Peroxisome
CSS0005534	1	0.931934	2.12983e-08	4.23494e-07	Protein CHROMATIN REMODELING like	--	GO:0003677,GO:0004386,GO:0005524,GO:0005634,GO:0006325,GO:0009506	DNA binding|helicase activity|ATP binding|nucleus|chromatin organization|plasmodesma	--	--
CSS0046566	2	1.01339	1.27504e-83	2.85051e-81	cystatin	--	GO:0004869	cysteine-type endopeptidase inhibitor activity	--	--
CSS0040766	1	0.993259	0.00078358	0.00817477	Protein ALEX like	--	GO:0003729,GO:0006402,GO:0010228,GO:0032451,GO:0046872,GO:0051213,GO:0080167,GO:1990931	mRNA binding|mRNA catabolic process|vegetative to reproductive phase transition of meristem|demethylase activity|metal ion binding|dioxygenase activity|response to karrikin|RNA N6-methyladenosine dioxygenase activity	--	--
CSS0010856	1	0.97657	1.45979e-06	2.36019e-05	Uncharacterized protein TCM_040942	--	--	--	--	--
CSS0034097	2	0.887141	0.000115161	0.00141021	PREDICTED: putative F-box/kelch-repeat protein At4g12810	--	GO:0005634,GO:0016567	nucleus|protein ubiquitination	--	--
CSS0023003	2	0.90854	7.63956e-06	0.0001125	dihydropyrimidinase-like protein	--	GO:0004157,GO:0005783,GO:0005794,GO:0006212,GO:0012505,GO:0019483,GO:0043562,GO:0046872	dihydropyrimidinase activity|endoplasmic reticulum|Golgi apparatus|uracil catabolic process|endomembrane system|beta-alanine biosynthetic process|cellular response to nitrogen levels|metal ion binding	ko00240,ko00410,ko00770	Pyrimidine metabolism|beta-Alanine metabolism|Pantothenate and CoA biosynthesis
CSS0021100	2	0.965872	0.000176922	0.00209295	unnamed protein product, partial	--	--	--	--	--
CSS0031102	1	0.981094	8.11736e-07	1.35089e-05	hypothetical protein DCAR_031620	--	GO:0003779,GO:0005737,GO:0005856,GO:0007015,GO:0010119	actin binding|cytoplasm|cytoskeleton|actin filament organization|regulation of stomatal movement	--	--
CSS0015129	2	0.937899	1.67196e-05	0.000234394	PREDICTED: feruloyl CoA ortho-hydroxylase 1-like	--	GO:0009805,GO:0010421,GO:0046872,GO:0051213	coumarin biosynthetic process|hydrogen peroxide-mediated programmed cell death|metal ion binding|dioxygenase activity	--	--
CSS0003231	2	1.10709	0.000178895	0.00211184	PREDICTED: calmodulin-7-like isoform X1	--	GO:0005509	calcium ion binding	--	--
CSS0043135	2	0.92794	8.73888e-05	0.00109296	Esterase	--	GO:0004146,GO:0005524,GO:0005739,GO:0005829,GO:0006730,GO:0046452,GO:0046654,GO:0046655,GO:0050661	dihydrofolate reductase activity|ATP binding|mitochondrion|cytosol|one-carbon metabolic process|dihydrofolate metabolic process|tetrahydrofolate biosynthetic process|folic acid metabolic process|NADP binding	--	--
CSS0021895	2	0.754042	7.04227e-16	2.42378e-14	E3 ubiquitin-protein ligase RHC1A	--	GO:0005618,GO:0005634,GO:0005737,GO:0006511,GO:0009651,GO:0009938,GO:0016567,GO:0046872,GO:0061630	cell wall|nucleus|cytoplasm|ubiquitin-dependent protein catabolic process|response to salt stress|negative regulation of gibberellic acid mediated signaling pathway|protein ubiquitination|metal ion binding|ubiquitin protein ligase activity	--	--
CSS0003876	2	0.909635	7.38263e-20	3.10322e-18	CBL-interacting serine/threonine-protein kinase, putative	--	GO:0004674,GO:0005524,GO:0007165	protein serine/threonine kinase activity|ATP binding|signal transduction	--	--
CSS0043612	2	0.867145	0.00062447	0.00664379	COP9 signalosome, subunit CSN2	--	GO:0000338,GO:0003714,GO:0005634,GO:0005829,GO:0007275,GO:0008180,GO:0009585,GO:0030163,GO:0045892	protein deneddylation|transcription corepressor activity|nucleus|cytosol|multicellular organism development|COP9 signalosome|red, far-red light phototransduction|protein catabolic process|negative regulation of transcription, DNA-templated	--	--
CSS0021345	2	0.926479	2.16528e-06	3.42627e-05	Proteasome subunit alpha type-3 like	--	GO:0004298,GO:0005634,GO:0005737,GO:0006511,GO:0019773	threonine-type endopeptidase activity|nucleus|cytoplasm|ubiquitin-dependent protein catabolic process|proteasome core complex, alpha-subunit complex	--	--
CSS0025516	2	0.886252	1.16694e-42	1.13166e-40	unnamed protein product, partial	--	GO:0005524,GO:0005886,GO:0005975,GO:0006633,GO:0042128	ATP binding|plasma membrane|carbohydrate metabolic process|fatty acid biosynthetic process|nitrate assimilation	--	--
CSS0024509	2	0.836338	1.19089e-17	4.51724e-16	PREDICTED: 60S ribosomal protein L44-like	--	GO:0003735,GO:0005840,GO:0006412	structural constituent of ribosome|ribosome|translation	ko03010	Ribosome
CSS0043006	1	0.842361	5.55501e-50	6.34993e-48	hypothetical protein CEY00_Acc30285	--	GO:0005886,GO:0009506,GO:0016021,GO:0042742	plasma membrane|plasmodesma|integral component of membrane|defense response to bacterium	--	--
CSS0039699	2	0.701247	4.16542e-57	5.68806e-55	60S ribosomal protein	--	GO:0003723,GO:0003735,GO:0005840,GO:0006412	RNA binding|structural constituent of ribosome|ribosome|translation	ko03010	Ribosome
CSS0002518	2	0.708261	6.75318e-94	1.74084e-91	Succinate dehydrogenase	--	GO:0005739,GO:0005749,GO:0005773,GO:0005774,GO:0006099,GO:0009536,GO:0043495,GO:0045273	mitochondrion|mitochondrial respiratory chain complex II, succinate dehydrogenase complex (ubiquinone)|vacuole|vacuolar membrane|tricarboxylic acid cycle|plastid|protein membrane anchor|respiratory chain complex II	--	--
CSS0039121	2	0.928357	2.33666e-05	0.000320957	Proteasome subunit alpha type-3 like	--	GO:0000502,GO:0004175,GO:0004298,GO:0005634,GO:0005737,GO:0005773,GO:0005774,GO:0005829,GO:0005839,GO:0009409,GO:0010498,GO:0010499,GO:0019773,GO:0043161,GO:0046686,GO:0048046	proteasome complex|endopeptidase activity|threonine-type endopeptidase activity|nucleus|cytoplasm|vacuole|vacuolar membrane|cytosol|proteasome core complex|response to cold|proteasomal protein catabolic process|proteasomal ubiquitin-independent protein catabolic process|proteasome core complex, alpha-subunit complex|proteasome-mediated ubiquitin-dependent protein catabolic process|response to cad…	--	--
CSS0013127	2	0.953499	6.69851e-06	9.96884e-05	Coiled-coil domain-containing protein	--	--	--	--	--
CSS0031266	2	0.908256	1.37927e-06	2.23788e-05	Eukaryotic translation initiation factor 3 subunit C like	--	--	--	--	--
CSS0001895	1	0.909044	4.78917e-07	8.17199e-06	Callose synthase	--	GO:0000148,GO:0003843,GO:0005794,GO:0005886,GO:0006075,GO:0008360,GO:0009555,GO:0009556,GO:0009846,GO:0016021,GO:0048589,GO:0052543,GO:0055047,GO:0080092	1,3-beta-D-glucan synthase complex|1,3-beta-D-glucan synthase activity|Golgi apparatus|plasma membrane|(1->3)-beta-D-glucan biosynthetic process|regulation of cell shape|pollen development|microsporogenesis|pollen germination|integral component of membrane|developmental growth|callose deposition in cell wall|generative cell mitosis|regulation of pollen tube growth	--	--
CSS0050106	2	4.81674	4.62802e-19	1.85727e-17	Peroxidase	--	GO:0004601,GO:0005576,GO:0006979,GO:0020037,GO:0042744,GO:0046872	peroxidase activity|extracellular region|response to oxidative stress|heme binding|hydrogen peroxide catabolic process|metal ion binding	ko00940	Phenylpropanoid biosynthesis
CSS0011466	1	1.85063	2.71928e-303	4.16338e-300	putative peroxidase	--	GO:0004601,GO:0005576,GO:0006979,GO:0020037,GO:0042744,GO:0046872	peroxidase activity|extracellular region|response to oxidative stress|heme binding|hydrogen peroxide catabolic process|metal ion binding	--	--
CSS0013157	1	1.27253	1.50729e-67	2.48064e-65	peroxidase 15-like	--	GO:0004601,GO:0005576,GO:0006979,GO:0020037,GO:0042744,GO:0046872	peroxidase activity|extracellular region|response to oxidative stress|heme binding|hydrogen peroxide catabolic process|metal ion binding	--	--
CSS0009828	1	1.33994	2.01898e-13	6.00407e-12	peroxidase 15-like	--	GO:0004601,GO:0005576,GO:0006979,GO:0020037,GO:0042744,GO:0046872	peroxidase activity|extracellular region|response to oxidative stress|heme binding|hydrogen peroxide catabolic process|metal ion binding	--	--
CSS0019909	1	1.06857	1.0094e-56	1.36e-54	hypothetical protein PAHAL_2G447700	--	--	--	--	--
CSS0042503	1	1.05535	0.000299119	0.00340459	Metal tolerance protein	--	GO:0005774,GO:0008324,GO:0016021	vacuolar membrane|cation transmembrane transporter activity|integral component of membrane	--	--
CSS0003010	2	0.991459	0.00023261	0.00269185	hypothetical protein CEY00_Acc32523	--	GO:0005886,GO:0006869,GO:0008289,GO:0031225	plasma membrane|lipid transport|lipid binding|anchored component of membrane	--	--
CSS0010031	2	4.67967	0.000498326	0.0054427	uncharacterized protein LOC111887883	--	--	--	--	--
CSS0030155	2	0.906413	0.0006476	0.00687169	PREDICTED: tubulin alpha-3 chain	--	GO:0003924,GO:0005200,GO:0005525,GO:0005737,GO:0005874,GO:0007017	GTPase activity|structural constituent of cytoskeleton|GTP binding|cytoplasm|microtubule|microtubule-based process	ko04145	Phagosome
CSS0035837	1	1.20702	1.29794e-05	0.000185092	IQ domain-containing protein	--	GO:0005634,GO:0005737	nucleus|cytoplasm	--	--
CSS0011974	2	0.881434	8.32534e-16	2.84792e-14	PREDICTED: tubulin alpha-3 chain	--	GO:0003924,GO:0005200,GO:0005525,GO:0005737,GO:0005874,GO:0007017	GTPase activity|structural constituent of cytoskeleton|GTP binding|cytoplasm|microtubule|microtubule-based process	ko04145	Phagosome
CSS0017762	2	0.948819	6.14916e-05	0.00079035	Mitochondrial oxoglutarate/malate carrier protein	--	GO:0005310,GO:0005618,GO:0005739,GO:0005743,GO:0005774,GO:0006835,GO:0009506,GO:0009507,GO:0009941,GO:0015142,GO:0015367,GO:0016021,GO:0035674	dicarboxylic acid transmembrane transporter activity|cell wall|mitochondrion|mitochondrial inner membrane|vacuolar membrane|dicarboxylic acid transport|plasmodesma|chloroplast|chloroplast envelope|tricarboxylic acid transmembrane transporter activity|oxoglutarate:malate antiporter activity|integral component of membrane|tricarboxylic acid transmembrane transport	--	--
CSS0037999	2	0.841316	2.41381e-06	3.7993e-05	ATP synthase subunit epsilon like	--	GO:0000275,GO:0015986,GO:0046933	mitochondrial proton-transporting ATP synthase complex, catalytic core F(1)|ATP synthesis coupled proton transport|proton-transporting ATP synthase activity, rotational mechanism	ko00190	Oxidative phosphorylation
CSS0011304	2	0.858118	4.98523e-06	7.53001e-05	Ribosome biogenesis regulatory protein	--	GO:0000055,GO:0000447,GO:0005730,GO:0030687,GO:0042273	ribosomal large subunit export from nucleus|endonucleolytic cleavage in ITS1 to separate SSU-rRNA from 5.8S rRNA and LSU-rRNA from tricistronic rRNA transcript (SSU-rRNA, 5.8S rRNA, LSU-rRNA)|nucleolus|preribosome, large subunit precursor|ribosomal large subunit biogenesis	--	--
CSS0032446	2	0.952161	0.000182564	0.00215013	uncharacterized protein LOC111789396	--	--	--	--	--
CSS0021925	2	0.870522	5.76918e-05	0.000744731	hypothetical protein CDL15_Pgr020175	--	--	--	--	--
CSS0033613	2	0.874668	6.8377e-06	0.000101532	uncharacterized protein LOC111789396	--	--	--	--	--
CSS0046709	1	0.914568	5.35211e-08	1.01317e-06	Sacsin like	--	--	--	--	--
CSS0039901	1	0.940464	0.000118691	0.00145026	LysM and putative peptidoglycan-binding domain-containing protein	--	--	--	--	--
CSS0050259	1	0.917283	0.000801207	0.00833457	ENHANCER OF AG-4 protein	--	GO:0003700,GO:0005634,GO:0006397,GO:0009910,GO:0030154,GO:0043481,GO:0048497,GO:0048510	DNA-binding transcription factor activity|nucleus|mRNA processing|negative regulation of flower development|cell differentiation|anthocyanin accumulation in tissues in response to UV light|maintenance of floral organ identity|regulation of timing of transition from vegetative to reproductive phase	--	--
CSS0049289	2	0.949402	6.21773e-06	9.2999e-05	hypothetical protein VITISV_003303	--	--	--	--	--
CSS0004353	2	0.839073	3.21102e-13	9.38328e-12	Anthranilate synthase beta subunit 1 like	--	GO:0000162,GO:0004049,GO:0005950,GO:0006541,GO:0009507,GO:0010600	tryptophan biosynthetic process|anthranilate synthase activity|anthranilate synthase complex|glutamine metabolic process|chloroplast|regulation of auxin biosynthetic process	ko00400	Phenylalanine, tyrosine and tryptophan biosynthesis
CSS0034481	2	1.36673	2.52791e-25	1.33881e-23	Xyloglucan endotransglucosylase/hydrolase protein	--	GO:0004553,GO:0005618,GO:0010087,GO:0010411,GO:0016762,GO:0042546,GO:0048046,GO:0071555	hydrolase activity, hydrolyzing O-glycosyl compounds|cell wall|phloem or xylem histogenesis|xyloglucan metabolic process|xyloglucan:xyloglucosyl transferase activity|cell wall biogenesis|apoplast|cell wall organization	--	--
CSS0029198	1	0.872273	2.56119e-07	4.50728e-06	Vacuolar protein sorting-associated protein like	--	GO:0005628,GO:0005794,GO:0006623,GO:0007005,GO:0019898,GO:0032120,GO:0044232,GO:0045053,GO:0045324,GO:0071561,GO:1990816	prospore membrane|Golgi apparatus|protein targeting to vacuole|mitochondrion organization|extrinsic component of membrane|ascospore-type prospore membrane assembly|organelle membrane contact site|protein retention in Golgi apparatus|late endosome to vacuole transport|nucleus-vacuole junction|vacuole-mitochondrion membrane contact site	--	--
CSS0040361	1	0.907961	6.29846e-52	7.52317e-50	G-type lectin S-receptor-like serine/threonine-protein kinase	--	--	--	--	--
CSS0024886	1	0.998508	1.45527e-06	2.35363e-05	Late blight resistance protein like	--	GO:0005524,GO:0005737,GO:0009626,GO:0016020,GO:0043531	ATP binding|cytoplasm|plant-type hypersensitive response|membrane|ADP binding	--	--
CSS0031782	2	0.863927	8.4189e-05	0.00105628	vacuolar fusion protein CCZ1 homolog B-like isoform X2	--	GO:0005085,GO:0016192,GO:0035658,GO:0043231	guanyl-nucleotide exchange factor activity|vesicle-mediated transport|Mon1-Ccz1 complex|intracellular membrane-bounded organelle	--	--
CSS0006690	2	0.923939	2.47416e-07	4.36782e-06	trehalose-phosphate synthase 6	--	GO:0003825,GO:0004805,GO:0005737,GO:0005992,GO:0070413	alpha,alpha-trehalose-phosphate synthase (UDP-forming) activity|trehalose-phosphatase activity|cytoplasm|trehalose biosynthetic process|trehalose metabolism in response to stress	ko00500	Starch and sucrose metabolism
CSS0046309	2	0.881412	2.61389e-06	4.09763e-05	Glioma tumor suppressor candidate region protein	--	--	--	--	--
CSS0037885	2	1.26697	3.15614e-21	1.40126e-19	Cysteine-rich repeat secretory protein like, partial	--	GO:0009506,GO:0016021,GO:0016032,GO:0042742,GO:0051707	plasmodesma|integral component of membrane|viral process|defense response to bacterium|response to other organism	--	--
CSS0011821	1	0.933001	8.13299e-09	1.67722e-07	Inactive receptor kinase precursor	--	--	--	--	--
CSS0033953	1	1.12028	4.95593e-12	1.33049e-10	Pectinesterase inhibitor domain protein	--	GO:0004857,GO:0009641,GO:0043086,GO:0048046	enzyme inhibitor activity|shade avoidance|negative regulation of catalytic activity|apoplast	--	--
CSS0033219	2	1.54052	6.84911e-05	0.000873206	HMG-Y-related protein like	--	GO:0000786,GO:0003690,GO:0005634,GO:0005730,GO:0006334,GO:0006355,GO:0016584,GO:0030261,GO:0031492,GO:0031936,GO:0045910	nucleosome|double-stranded DNA binding|nucleus|nucleolus|nucleosome assembly|regulation of transcription, DNA-templated|nucleosome positioning|chromosome condensation|nucleosomal DNA binding|negative regulation of chromatin silencing|negative regulation of DNA recombination	--	--
CSS0010645	1	1.21771	4.91303e-15	1.60875e-13	Myosin-binding protein	--	GO:0016021,GO:0017022,GO:0030133	integral component of membrane|myosin binding|transport vesicle	--	--
CSS0012624	1	0.95749	7.6843e-05	0.000971109	Clathrin assembly protein	--	GO:0005545,GO:0005794,GO:0005886,GO:0005905,GO:0006897,GO:0016020,GO:0030136,GO:0030276,GO:0048268	1-phosphatidylinositol binding|Golgi apparatus|plasma membrane|clathrin-coated pit|endocytosis|membrane|clathrin-coated vesicle|clathrin binding|clathrin coat assembly	--	--
CSS0033176	1	1.02903	7.31528e-05	0.000927024	Superkiller protein	--	--	--	--	--
CSS0010642	2	0.860976	2.67215e-07	4.68786e-06	Phytanoyl-CoA dioxygenase	--	GO:0005886,GO:0006631,GO:0031418,GO:0046872,GO:0048244	plasma membrane|fatty acid metabolic process|L-ascorbic acid binding|metal ion binding|phytanoyl-CoA dioxygenase activity	ko04146	Peroxisome
CSS0046092	1	1.08537	1.25435e-28	7.57183e-27	Mitogen-activated protein kinase	--	GO:0004707,GO:0005524,GO:0005634,GO:0005737,GO:0006952,GO:0010468,GO:0035556	MAP kinase activity|ATP binding|nucleus|cytoplasm|defense response|regulation of gene expression|intracellular signal transduction	ko04016	MAPK signaling pathway - plant
CSS0034489	1	1.11575	0.000140899	0.00169619	mitogen-activated protein kinase 9-like	--	GO:0004707,GO:0005524,GO:0005622	MAP kinase activity|ATP binding|intracellular	ko04016	MAPK signaling pathway - plant
CSS0028900	2	1.07327	2.20551e-07	3.91928e-06	Nudix hydrolase	--	GO:0004081,GO:0006753,GO:0008893,GO:0015967,GO:0046872	bis(5'-nucleosyl)-tetraphosphatase (asymmetrical) activity|nucleoside phosphate metabolic process|guanosine-3',5'-bis(diphosphate) 3'-diphosphatase activity|diadenosine tetraphosphate catabolic process|metal ion binding	--	--
CSS0040674	2	0.970194	1.86673e-05	0.000259825	hypothetical protein DCAR_030228	--	GO:0005507,GO:0005524,GO:0005739,GO:0005759,GO:0009408,GO:0046872,GO:0051082,GO:0051085,GO:0051087	copper ion binding|ATP binding|mitochondrion|mitochondrial matrix|response to heat|metal ion binding|unfolded protein binding|chaperone cofactor-dependent protein refolding|chaperone binding	--	--
CSS0027743	1	1.30238	7.11558e-07	1.19163e-05	Cytochrome P450 CYP749A22 like	--	GO:0004497,GO:0005506,GO:0016021,GO:0016705,GO:0020037	monooxygenase activity|iron ion binding|integral component of membrane|oxidoreductase activity, acting on paired donors, with incorporation or reduction of molecular oxygen|heme binding	ko00905	Brassinosteroid biosynthesis
CSS0033051	2	0.91192	0.000200667	0.00235182	hypothetical protein TanjilG_29986	--	--	--	--	--
CSS0009789	1	1.38529	1.36465e-10	3.28485e-09	Eukaryotic translation initiation factor 3 subunit A like	--	GO:0009707,GO:0010319,GO:0016021,GO:0020037,GO:0031966,GO:0046872	chloroplast outer membrane|stromule|integral component of membrane|heme binding|mitochondrial membrane|metal ion binding	--	--
CSS0048612	2	0.934515	2.90999e-06	4.53368e-05	CDP-diacylglycerol--inositol 3-phosphatidyltransferase	--	GO:0003881,GO:0005783,GO:0005794,GO:0006661,GO:0008654,GO:0016020,GO:0016021,GO:0046872	CDP-diacylglycerol-inositol 3-phosphatidyltransferase activity|endoplasmic reticulum|Golgi apparatus|phosphatidylinositol biosynthetic process|phospholipid biosynthetic process|membrane|integral component of membrane|metal ion binding	ko00562,ko00564,ko04070	Inositol phosphate metabolism|Glycerophospholipid metabolism|Phosphatidylinositol signaling system
CSS0042501	2	0.934323	0.000957564	0.00978588	PLASMODESMATA CALLOSE-BINDING PROTEIN 3 like	--	GO:0001872,GO:0009408,GO:0009506,GO:0030247,GO:0031225,GO:0046658	(1->3)-beta-D-glucan binding|response to heat|plasmodesma|polysaccharide binding|anchored component of membrane|anchored component of plasma membrane	--	--
CSS0040817	1	0.949002	0.000782536	0.00816724	--	--	--	--	--	--
CSS0045101	2	1.21453	3.23671e-22	1.51002e-20	nodulin-related protein 1-like	--	GO:0006952,GO:0009408,GO:0009409,GO:0009617,GO:0009651,GO:0009738,GO:1900426	defense response|response to heat|response to cold|response to bacterium|response to salt stress|abscisic acid-activated signaling pathway|positive regulation of defense response to bacterium	--	--
CSS0018865	2	1.23571	0.000262892	0.00302152	NAC transcription factor	NAC	GO:0003677,GO:0006355	DNA binding|regulation of transcription, DNA-templated	--	--
CSS0049187	2	0.819665	1.28011e-115	4.39982e-113	E3 ubiquitin-protein ligase RING1-like	--	GO:0000209,GO:0005737,GO:0005829,GO:0016567,GO:0046872,GO:0051787,GO:0051865,GO:0061630,GO:0061635,GO:0071218,GO:0071629	protein polyubiquitination|cytoplasm|cytosol|protein ubiquitination|metal ion binding|misfolded protein binding|protein autoubiquitination|ubiquitin protein ligase activity|regulation of protein complex stability|cellular response to misfolded protein|cytoplasm protein quality control by the ubiquitin-proteasome system	--	--
CSS0017226	1	0.919126	3.99622e-05	0.000528835	Apyrase	--	GO:0005524,GO:0009901,GO:0010584,GO:0016021,GO:0030659,GO:0102485,GO:0102486,GO:0102487,GO:0102488,GO:0102489,GO:0102490,GO:0102491	ATP binding|anther dehiscence|pollen exine formation|integral component of membrane|cytoplasmic vesicle membrane|dATP phosphohydrolase activity|dCTP phosphohydrolase activity|dUTP phosphohydrolase activity|dTTP phosphohydrolase activity|GTP phosphohydrolase activity|8-oxo-dGTP phosphohydrolase activity|dGTP phosphohydrolase activity	--	--
CSS0023945	1	1.07267	7.68762e-05	0.000971285	High mobility group protein like	--	--	--	--	--
CSS0015191	2	0.776957	8.02577e-09	1.65714e-07	40S ribosomal protein like	--	GO:0003735,GO:0005829,GO:0006412,GO:0009506,GO:0016020,GO:0019843,GO:0022627,GO:0045903	structural constituent of ribosome|cytosol|translation|plasmodesma|membrane|rRNA binding|cytosolic small ribosomal subunit|positive regulation of translational fidelity	ko03010	Ribosome
CSS0032093	1	0.939288	0.00015357	0.00183517	sucrose transporter	--	GO:0005794,GO:0005886,GO:0005985,GO:0008515,GO:0009611,GO:0015293,GO:0015770,GO:0016021,GO:0090406	Golgi apparatus|plasma membrane|sucrose metabolic process|sucrose transmembrane transporter activity|response to wounding|symporter activity|sucrose transport|integral component of membrane|pollen tube	--	--
CSS0020083	2	0.923508	0.000276152	0.00316385	hypothetical protein POPTR_010G093700v3	--	--	--	--	--
CSS0047597	2	0.774048	0.000123512	0.00150259	unnamed protein product, partial	--	GO:0005524,GO:0016567,GO:0016740	ATP binding|protein ubiquitination|transferase activity	ko04120	Ubiquitin mediated proteolysis
CSS0011407	2	0.781966	9.95059e-22	4.53073e-20	Methyltransferase PMT9	--	--	--	--	--
CSS0029810	2	5.21193	7.04078e-07	1.17949e-05	Thioredoxin like	--	GO:0005739,GO:0005829,GO:0005886,GO:0006662,GO:0015035,GO:0016671,GO:0045454	mitochondrion|cytosol|plasma membrane|glycerol ether metabolic process|protein disulfide oxidoreductase activity|oxidoreductase activity, acting on a sulfur group of donors, disulfide as acceptor|cell redox homeostasis	--	--
CSS0006059	1	1.12054	0.000146379	0.00175714	Germin-like protein subfamily 1 member 13	--	GO:0005618,GO:0030145,GO:0045735,GO:0048046	cell wall|manganese ion binding|nutrient reservoir activity|apoplast	--	--
CSS0047179	1	0.895337	0.000412469	0.00457519	Phospholipid-transporting ATPase	--	GO:0000139,GO:0000287,GO:0004012,GO:0005524,GO:0005548,GO:0005768,GO:0005789,GO:0005794,GO:0005802,GO:0005886,GO:0016021,GO:0045332,GO:0048194,GO:0048364,GO:0048367	Golgi membrane|magnesium ion binding|phospholipid-translocating ATPase activity|ATP binding|phospholipid transporter activity|endosome|endoplasmic reticulum membrane|Golgi apparatus|trans-Golgi network|plasma membrane|integral component of membrane|phospholipid translocation|Golgi vesicle budding|root development|shoot system development	--	--
CSS0011283	1	1.11512	1.03648e-08	2.11077e-07	Formin-like protein	--	GO:0003779,GO:0005522,GO:0005886,GO:0005911,GO:0009932,GO:0016021,GO:0045010,GO:0051015	actin binding|profilin binding|plasma membrane|cell-cell junction|cell tip growth|integral component of membrane|actin nucleation|actin filament binding	--	--
CSS0046733	1	1.19213	1.03006e-05	0.000148867	Two-component response regulator like	--	GO:0000156,GO:0004674,GO:0005634,GO:0005737,GO:0006355,GO:0007623,GO:0009735,GO:0009736,GO:0009793,GO:0010017,GO:0010114,GO:0046777	phosphorelay response regulator activity|protein serine/threonine kinase activity|nucleus|cytoplasm|regulation of transcription, DNA-templated|circadian rhythm|response to cytokinin|cytokinin-activated signaling pathway|embryo development ending in seed dormancy|red or far-red light signaling pathway|response to red light|protein autophosphorylation	ko04075	Plant hormone signal transduction
CSS0003293	1	0.864242	0.000123435	0.00150206	CHD3-type chromatin-remodeling factor PICKLE like	--	GO:0003677,GO:0004386,GO:0005524,GO:0005634,GO:0006338,GO:0008283,GO:0009733,GO:0009736,GO:0009739,GO:0009788,GO:0045892,GO:0046872,GO:0048364,GO:2000023	DNA binding|helicase activity|ATP binding|nucleus|chromatin remodeling|cell proliferation|response to auxin|cytokinin-activated signaling pathway|response to gibberellin|negative regulation of abscisic acid-activated signaling pathway|negative regulation of transcription, DNA-templated|metal ion binding|root development|regulation of lateral root development	--	--
CSS0033998	1	1.03609	0.000950394	0.00972431	Receptor-like protein kinase	--	--	--	--	--
CSS0003196	2	0.926101	2.39995e-09	5.22437e-08	Hydroxyproline O-arabinosyltransferase	--	GO:0005768,GO:0005774,GO:0005794,GO:0005801,GO:0005802,GO:0005886,GO:0016020,GO:0016021,GO:1990585	endosome|vacuolar membrane|Golgi apparatus|cis-Golgi network|trans-Golgi network|plasma membrane|membrane|integral component of membrane|hydroxyproline O-arabinosyltransferase activity	ko00514	Other types of O-glycan biosynthesis
CSS0040814	1	1.00253	8.0948e-08	1.50143e-06	Peptidyl-prolyl cis-trans isomerase	--	--	--	--	--
CSS0013132	2	0.851789	3.39558e-10	7.96111e-09	F-box protein	--	GO:0005634,GO:0005737,GO:0009626,GO:0016567,GO:0031348,GO:0042177	nucleus|cytoplasm|plant-type hypersensitive response|protein ubiquitination|negative regulation of defense response|negative regulation of protein catabolic process	--	--
CSS0024153	2	0.779967	1.38554e-09	3.08254e-08	ER membrane protein complex subunit 7 like	--	GO:0005783,GO:0030246,GO:0072546	endoplasmic reticulum|carbohydrate binding|ER membrane protein complex	--	--
CSS0038705	2	0.873714	4.99116e-08	9.47684e-07	DNA-directed RNA polymerases II, IV and V subunit 11	--	GO:0000418,GO:0000419,GO:0001055,GO:0003677,GO:0005665,GO:0046983	RNA polymerase IV complex|RNA polymerase V complex|RNA polymerase II activity|DNA binding|RNA polymerase II, core complex|protein dimerization activity	ko03020	RNA polymerase
CSS0044162	1	0.940622	1.9486e-19	7.99131e-18	EIN3-binding F box protein 1	--	GO:0005634,GO:0006511,GO:0009723,GO:0009873,GO:0010105,GO:0016567,GO:0019005,GO:0031146	nucleus|ubiquitin-dependent protein catabolic process|response to ethylene|ethylene-activated signaling pathway|negative regulation of ethylene-activated signaling pathway|protein ubiquitination|SCF ubiquitin ligase complex|SCF-dependent proteasomal ubiquitin-dependent protein catabolic process	--	--
CSS0049952	2	0.917357	4.69384e-07	8.01475e-06	PREDICTED: uncharacterized protein LOC105033975 isoform X1	--	--	--	--	--
CSS0048476	2	0.914101	1.63833e-33	1.19792e-31	bZIP transcription factor 16	bZIP	GO:0003700,GO:0005634,GO:0009585,GO:0010017,GO:0010099,GO:0010114,GO:0010218,GO:0043565	DNA-binding transcription factor activity|nucleus|red, far-red light phototransduction|red or far-red light signaling pathway|regulation of photomorphogenesis|response to red light|response to far red light|sequence-specific DNA binding	ko04712	Circadian rhythm - plant
CSS0037183	2	4.67652	1.32933e-16	4.74997e-15	TATA-binding protein-associated factor 2N	--	GO:0003723,GO:0005730,GO:0046872	RNA binding|nucleolus|metal ion binding	--	--
CSS0026664	2	0.671677	1.40245e-11	3.64125e-10	hypothetical protein GLYMA_04G069200	--	GO:0003924,GO:0005525,GO:0005634,GO:0005737,GO:0005794,GO:0006606,GO:0009506	GTPase activity|GTP binding|nucleus|cytoplasm|Golgi apparatus|protein import into nucleus|plasmodesma	--	--
CSS0004095	2	0.965087	2.93268e-05	0.000395446	Cytochrome b-c1 complex subunit like	--	GO:0005750,GO:0005774,GO:0006122,GO:0009536	mitochondrial respiratory chain complex III|vacuolar membrane|mitochondrial electron transport, ubiquinol to cytochrome c|plastid	ko00190	Oxidative phosphorylation
CSS0040563	1	0.9429	4.7105e-08	8.97767e-07	Histone-lysine N-methyltransferase	--	GO:0005634,GO:0009908,GO:0018024,GO:0035556,GO:0042054,GO:0046872,GO:0048578	nucleus|flower development|histone-lysine N-methyltransferase activity|intracellular signal transduction|histone methyltransferase activity|metal ion binding|positive regulation of long-day photoperiodism, flowering	--	--
CSS0034867	1	0.89133	1.1436e-06	1.87295e-05	PREDICTED: uncharacterized protein LOC100262933 isoform X1	--	--	--	--	--
CSS0029434	2	0.721618	4.5652e-152	2.09688e-149	60S ribosomal protein like, partial	--	GO:0003735,GO:0006412,GO:0019843,GO:0022625,GO:0046872	structural constituent of ribosome|translation|rRNA binding|cytosolic large ribosomal subunit|metal ion binding	--	--
CSS0042090	2	0.774692	1.2041e-23	5.92378e-22	Protein PEROXIN-4	--	GO:0004842,GO:0005524,GO:0005778,GO:0006635,GO:0007031,GO:0016558,GO:0016567	ubiquitin-protein transferase activity|ATP binding|peroxisomal membrane|fatty acid beta-oxidation|peroxisome organization|protein import into peroxisome matrix|protein ubiquitination	--	--
CSS0006160	2	0.863533	4.03732e-07	6.94537e-06	uncharacterized protein LOC109799781	--	--	--	--	--
CSS0034391	2	0.90509	2.79943e-08	5.47585e-07	putative transport protein particle (TRAPP) component	--	GO:0005634,GO:0005783,GO:0005794,GO:0005801,GO:0005829,GO:0006886,GO:0006888,GO:0006891,GO:0030008,GO:0033106	nucleus|endoplasmic reticulum|Golgi apparatus|cis-Golgi network|cytosol|intracellular protein transport|ER to Golgi vesicle-mediated transport|intra-Golgi vesicle-mediated transport|TRAPP complex|cis-Golgi network membrane	--	--
CSS0002008	1	1.53173	1.0667e-37	9.02768e-36	NADP-dependent malic enzyme like	--	GO:0004471,GO:0004473,GO:0005737,GO:0008948,GO:0046872,GO:0051287	malate dehydrogenase (decarboxylating) (NAD+) activity|malate dehydrogenase (decarboxylating) (NADP+) activity|cytoplasm|oxaloacetate decarboxylase activity|metal ion binding|NAD binding	ko00620,ko00710	Pyruvate metabolism|Carbon fixation in photosynthetic organisms
CSS0007940	1	1.90796	9.5442e-94	2.43546e-91	NADP-dependent malic enzyme like	--	GO:0004471,GO:0004473,GO:0005737,GO:0008948,GO:0046872,GO:0051287	malate dehydrogenase (decarboxylating) (NAD+) activity|malate dehydrogenase (decarboxylating) (NADP+) activity|cytoplasm|oxaloacetate decarboxylase activity|metal ion binding|NAD binding	ko00620,ko00710	Pyruvate metabolism|Carbon fixation in photosynthetic organisms
CSS0013973	2	0.956473	0.000901657	0.00926881	hypothetical protein Csa_2G372870	--	GO:0009877,GO:0016021	nodulation|integral component of membrane	--	--
CSS0034166	2	0.632435	1.34832e-11	3.50793e-10	6-phosphofructokinase 3-like protein	--	GO:0003872,GO:0005524,GO:0005829,GO:0006002,GO:0006096,GO:0010053,GO:0046872	6-phosphofructokinase activity|ATP binding|cytosol|fructose 6-phosphate metabolic process|glycolytic process|root epidermal cell differentiation|metal ion binding	ko00010,ko00030,ko00051,ko00052,ko03018	Glycolysis / Gluconeogenesis|Pentose phosphate pathway|Fructose and mannose metabolism|Galactose metabolism|RNA degradation
CSS0028638	2	0.919234	4.1064e-09	8.75055e-08	Glutamyl-tRNA(Gln) amidotransferase subunit C like	--	GO:0005524,GO:0005739,GO:0006450,GO:0009507,GO:0030956,GO:0032543,GO:0050567,GO:0070681	ATP binding|mitochondrion|regulation of translational fidelity|chloroplast|glutamyl-tRNA(Gln) amidotransferase complex|mitochondrial translation|glutaminyl-tRNA synthase (glutamine-hydrolyzing) activity|glutaminyl-tRNAGln biosynthesis via transamidation	ko00970	Aminoacyl-tRNA biosynthesis
CSS0012824	2	1.17264	2.61467e-120	9.43616e-118	Zinc finger CCCH domain-containing protein	C3H	GO:0003677,GO:0003700,GO:0003727,GO:0005886,GO:0006355,GO:0006979,GO:0046872	DNA binding|DNA-binding transcription factor activity|single-stranded RNA binding|plasma membrane|regulation of transcription, DNA-templated|response to oxidative stress|metal ion binding	--	--
CSS0029833	2	0.856985	4.72938e-08	9.01026e-07	PREDICTED: vacuolar protein sorting-associated protein 32 homolog 2	--	GO:0000815,GO:0005886,GO:0007034,GO:0015031	ESCRT III complex|plasma membrane|vacuolar transport|protein transport	ko04144	Endocytosis
CSS0042817	2	0.932982	1.49583e-12	4.19872e-11	exosome component 10 isoform X2	--	--	--	--	--
CSS0015178	2	0.892336	2.06695e-05	0.000286352	1,4-dihydroxy-2-naphthoyl-CoA thioesterase	--	GO:0005777,GO:0016289,GO:0042372,GO:0051289,GO:0061522	peroxisome|CoA hydrolase activity|phylloquinone biosynthetic process|protein homotetramerization|1,4-dihydroxy-2-naphthoyl-CoA thioesterase activity	--	--
CSS0030161	2	0.926987	4.18275e-14	1.29019e-12	reverse transcriptase	--	GO:0005634,GO:0005829	nucleus|cytosol	--	--
CSS0040029	2	0.817328	6.74855e-13	1.93733e-11	Vacuolar-processing enzyme like	--	GO:0008234	cysteine-type peptidase activity	--	--
CSS0040006	2	1.05001	3.36569e-05	0.000449752	BRISC and BRCA1-A complex member like	--	--	--	ko03440	Homologous recombination
CSS0015428	2	0.939734	0.000322194	0.0036467	Serine hydroxymethyltransferase	--	GO:0004372,GO:0006544,GO:0006565,GO:0006730,GO:0008270,GO:0009507,GO:0009536,GO:0009570,GO:0016597,GO:0019264,GO:0030170,GO:0035999,GO:0046653,GO:0046655,GO:0050897,GO:0070905,GO:1904482	glycine hydroxymethyltransferase activity|glycine metabolic process|L-serine catabolic process|one-carbon metabolic process|zinc ion binding|chloroplast|plastid|chloroplast stroma|amino acid binding|glycine biosynthetic process from serine|pyridoxal phosphate binding|tetrahydrofolate interconversion|tetrahydrofolate metabolic process|folic acid metabolic process|cobalt ion binding|serine binding|…	ko00260,ko00460,ko00630,ko00670	Glycine, serine and threonine metabolism|Cyanoamino acid metabolism|Glyoxylate and dicarboxylate metabolism|One carbon pool by folate
CSS0046941	1	0.991695	0.00069321	0.00730589	NADH dehydrogenase	--	GO:0005739,GO:0008137,GO:0046872,GO:0048038,GO:0051539,GO:0070469	mitochondrion|NADH dehydrogenase (ubiquinone) activity|metal ion binding|quinone binding|4 iron, 4 sulfur cluster binding|respiratory chain	ko00190	Oxidative phosphorylation
CSS0016047	2	1.01204	0.000201089	0.00235567	hypothetical protein EUGRSUZ_C00642	--	GO:0005509,GO:0005737,GO:0005768,GO:0005886,GO:0009705,GO:0042538,GO:0043266,GO:0050801	calcium ion binding|cytoplasm|endosome|plasma membrane|plant-type vacuole membrane|hyperosmotic salinity response|regulation of potassium ion transport|ion homeostasis	--	--
CSS0002577	1	1.33418	2.80315e-08	5.481e-07	PREDICTED: glutaredoxin-C6-like	--	GO:0005737,GO:0009055,GO:0015035,GO:0045454	cytoplasm|electron transfer activity|protein disulfide oxidoreductase activity|cell redox homeostasis	--	--
CSS0019575	2	0.854282	7.71691e-09	1.59859e-07	Phosphonates import ATP-binding protein like	--	--	--	--	--
CSS0021777	1	1.11934	0.000449212	0.00495448	abscisic acid 8'-hydroxylase 1	--	GO:0004497,GO:0005506,GO:0009687,GO:0016125,GO:0016705,GO:0020037,GO:0055114	monooxygenase activity|iron ion binding|abscisic acid metabolic process|sterol metabolic process|oxidoreductase activity, acting on paired donors, with incorporation or reduction of molecular oxygen|heme binding|oxidation-reduction process	ko00906	Carotenoid biosynthesis
CSS0003017	1	1.5495	9.00033e-24	4.44084e-22	--	--	--	--	--	--
CSS0010440	2	0.694142	3.25119e-15	1.07153e-13	hypothetical protein AQUCO_00600233v1	--	GO:0005634,GO:0005737,GO:0005769,GO:0005802,GO:0005886,GO:0008283,GO:0009553,GO:0009554,GO:0009556,GO:0009705,GO:0010449,GO:0035265,GO:0046872,GO:0048229,GO:0048364,GO:0051301	nucleus|cytoplasm|early endosome|trans-Golgi network|plasma membrane|cell proliferation|embryo sac development|megasporogenesis|microsporogenesis|plant-type vacuole membrane|root meristem growth|organ growth|metal ion binding|gametophyte development|root development|cell division	--	--
CSS0010090	1	1.12658	1.0594e-15	3.59235e-14	Serine/threonine protein kinase	--	--	--	--	--
CSS0002709	1	1.06703	1.08857e-07	1.99276e-06	G-type lectin S-receptor-like serine/threonine-protein kinase At1g67520	--	--	--	--	--
CSS0048019	1	2.00519	7.30735e-25	3.78283e-23	Isoflavone reductase	--	GO:0016491	oxidoreductase activity	ko00998	Biosynthesis of various secondary metabolites - part 2
CSS0027486	2	0.937018	3.6152e-06	5.56375e-05	50S ribosomal protein	--	--	--	--	--
CSS0039619	1	2.09095	1.0169e-18	4.02973e-17	UDP-glycosyltransferase	--	GO:0033837	anthocyanin 3'-O-beta-glucosyltransferase activity	--	--
CSS0047734	2	1.15833	1.92837e-15	6.41837e-14	Replication protein A subunit A like	--	GO:0000722,GO:0000724,GO:0000781,GO:0000785,GO:0000794,GO:0003684,GO:0003690,GO:0003697,GO:0005634,GO:0005662,GO:0006260,GO:0006265,GO:0006268,GO:0006281,GO:0006284,GO:0006289,GO:0006298,GO:0006312,GO:0007004,GO:0007131,GO:0016458,GO:0030491,GO:0035861,GO:0043565,GO:0051096,GO:0098505,GO:2000001	telomere maintenance via recombination|double-strand break repair via homologous recombination|chromosome, telomeric region|chromatin|condensed nuclear chromosome|damaged DNA binding|double-stranded DNA binding|single-stranded DNA binding|nucleus|DNA replication factor A complex|DNA replication|DNA topological change|DNA unwinding involved in DNA replication|DNA repair|base-excision repair|nucleo…	--	--
CSS0025617	1	1.19573	6.50945e-21	2.85247e-19	Extra-large guanine nucleotide-binding protein like	--	GO:0001664,GO:0003924,GO:0005525,GO:0005634,GO:0005834,GO:0007188,GO:0009617,GO:0009723,GO:0031683,GO:0046872,GO:2000280	G protein-coupled receptor binding|GTPase activity|GTP binding|nucleus|heterotrimeric G-protein complex|adenylate cyclase-modulating G protein-coupled receptor signaling pathway|response to bacterium|response to ethylene|G-protein beta/gamma-subunit complex binding|metal ion binding|regulation of root development	--	--
CSS0044631	2	0.914972	1.13161e-05	0.000162659	Cytochrome P450 CYP2 subfamily	--	GO:0005506,GO:0016020,GO:0016021,GO:0016709,GO:0020037,GO:0042343	iron ion binding|membrane|integral component of membrane|oxidoreductase activity, acting on paired donors, with incorporation or reduction of molecular oxygen, NAD(P)H as one donor, and incorporation of one atom of oxygen|heme binding|indole glucosinolate metabolic process	--	--
CSS0020384	1	1.02093	1.29719e-99	3.58146e-97	Cellulose synthase-like protein	--	GO:0005768,GO:0005794,GO:0005802,GO:0005886,GO:0009409,GO:0009833,GO:0016760,GO:0030173,GO:0030244,GO:0048767,GO:0051753,GO:0071555	endosome|Golgi apparatus|trans-Golgi network|plasma membrane|response to cold|plant-type primary cell wall biogenesis|cellulose synthase (UDP-forming) activity|integral component of Golgi membrane|cellulose biosynthetic process|root hair elongation|mannan synthase activity|cell wall organization	--	--
CSS0033679	2	0.836946	2.26041e-05	0.000311106	Dolichyl-diphosphooligosaccharide--protein glycosyltransferase subunit DAD1	--	GO:0004579,GO:0006487,GO:0008250,GO:0016021	dolichyl-diphosphooligosaccharide-protein glycotransferase activity|protein N-linked glycosylation|oligosaccharyltransferase complex|integral component of membrane	ko00510,ko00513,ko04141	N-Glycan biosynthesis|Various types of N-glycan biosynthesis|Protein processing in endoplasmic reticulum
CSS0031991	1	0.960763	1.61109e-07	2.89887e-06	Inactive poly	--	GO:0000303,GO:0003950,GO:0005634,GO:0005737,GO:0006809,GO:0006970,GO:0009414,GO:0009651,GO:0009723,GO:0009793,GO:0009816,GO:0009867,GO:0009873,GO:0010102,GO:0010193,GO:0012501,GO:0016032,GO:0016363,GO:2000377	response to superoxide|NAD+ ADP-ribosyltransferase activity|nucleus|cytoplasm|nitric oxide biosynthetic process|response to osmotic stress|response to water deprivation|response to salt stress|response to ethylene|embryo development ending in seed dormancy|defense response to bacterium, incompatible interaction|jasmonic acid mediated signaling pathway|ethylene-activated signaling pathway|lateral …	--	--
CSS0029820	1	1.19255	5.98395e-24	2.97871e-22	PREDICTED: lysine-specific demethylase JMJ706 isoform X2	--	--	--	--	--
CSS0026703	2	0.937492	0.000207407	0.00242295	dolichol-phosphate mannose synthase subunit 2	--	GO:0005783,GO:0006486,GO:0006506,GO:0019348,GO:0030176,GO:0030234,GO:0033185,GO:0097502	endoplasmic reticulum|protein glycosylation|GPI anchor biosynthetic process|dolichol metabolic process|integral component of endoplasmic reticulum membrane|enzyme regulator activity|dolichol-phosphate-mannose synthase complex|mannosylation	ko00510,ko00563	N-Glycan biosynthesis|Glycosylphosphatidylinositol (GPI)-anchor biosynthesis
CSS0000919	2	0.824796	2.23658e-12	6.18517e-11	Protein of unknown function DUF597 protein, partial	PLATZ	--	--	--	--
CSS0031017	1	0.788949	0.000375713	0.00420161	ADP-ribosylation factor GTPase-activating protein	--	GO:0000139,GO:0005096,GO:0005793,GO:0005802,GO:0005829,GO:0006888,GO:0006890,GO:0046872,GO:0048205	Golgi membrane|GTPase activator activity|endoplasmic reticulum-Golgi intermediate compartment|trans-Golgi network|cytosol|ER to Golgi vesicle-mediated transport|retrograde vesicle-mediated transport, Golgi to ER|metal ion binding|COPI coating of Golgi vesicle	ko04144	Endocytosis
CSS0027944	2	0.893515	0.00014982	0.00179513	Acetylornithine deacetylase	--	GO:0006526,GO:0008777,GO:0046872	arginine biosynthetic process|acetylornithine deacetylase activity|metal ion binding	ko00220	Arginine biosynthesis
CSS0032807	2	0.723547	4.21171e-19	1.69289e-17	TRNA-2-methylthio-N(6)-dimethylallyladenosine synthase	--	--	--	--	--
CSS0048146	2	1.15037	0.000304086	0.00345025	PREDICTED: protein LE25	--	--	--	--	--
CSS0020185	2	0.913055	9.34379e-12	2.45499e-10	Plant intracellular Ras-group-related LRR protein	--	GO:0009416	response to light stimulus	--	--
CSS0028384	2	0.887287	0.000139531	0.00168133	Tobamovirus multiplication protein like	--	GO:0046786	viral replication complex formation and maintenance	--	--
CSS0027921	2	0.694857	2.97116e-25	1.56536e-23	Tobamovirus multiplication protein like	--	GO:0005773,GO:0005794,GO:0009506,GO:0009705,GO:0016020,GO:0016021,GO:0043621,GO:0046786	vacuole|Golgi apparatus|plasmodesma|plant-type vacuole membrane|membrane|integral component of membrane|protein self-association|viral replication complex formation and maintenance	--	--
CSS0042705	1	0.898704	7.17058e-06	0.000106089	DnaJ subfamily C member like	MYB-related	GO:0003677,GO:0005634,GO:0005783,GO:0005789,GO:0005886,GO:0016021,GO:0048767	DNA binding|nucleus|endoplasmic reticulum|endoplasmic reticulum membrane|plasma membrane|integral component of membrane|root hair elongation	--	--
CSS0041371	1	0.942039	4.2055e-15	1.38155e-13	unnamed protein product, partial	--	GO:0000184,GO:0000932,GO:0003677,GO:0003729,GO:0004004,GO:0005524,GO:0005737,GO:0005829,GO:0005886,GO:0008270,GO:0009506,GO:0009611,GO:0009863,GO:0009867,GO:0010182,GO:0042742,GO:0048571	nuclear-transcribed mRNA catabolic process, nonsense-mediated decay|P-body|DNA binding|mRNA binding|ATP-dependent RNA helicase activity|ATP binding|cytoplasm|cytosol|plasma membrane|zinc ion binding|plasmodesma|response to wounding|salicylic acid mediated signaling pathway|jasmonic acid mediated signaling pathway|sugar mediated signaling pathway|defense response to bacterium|long-day photoperiodi…	ko03013,ko03015	RNA transport|mRNA surveillance pathway
CSS0000239	1	0.897811	0.000870407	0.00897811	SUPPRESSOR OF ABI3-5 like	--	GO:0000398,GO:0003723,GO:0005634,GO:0005681,GO:0006397,GO:0043484,GO:0046872	mRNA splicing, via spliceosome|RNA binding|nucleus|spliceosomal complex|mRNA processing|regulation of RNA splicing|metal ion binding	--	--
CSS0009658	1	0.841316	7.12982e-07	1.19362e-05	Methyltransferase	--	GO:0000139,GO:0005768,GO:0005774,GO:0005794,GO:0005802,GO:0008757,GO:0009505,GO:0016021,GO:0052546	Golgi membrane|endosome|vacuolar membrane|Golgi apparatus|trans-Golgi network|S-adenosylmethionine-dependent methyltransferase activity|plant-type cell wall|integral component of membrane|cell wall pectin metabolic process	--	--
CSS0045545	2	1.11148	0.000513566	0.00559223	unnamed protein product, partial	--	GO:0005509,GO:0005737,GO:0005886,GO:0006970,GO:0009409,GO:0009414,GO:0009651,GO:0009738,GO:0009860,GO:0019722,GO:0019900,GO:0090406	calcium ion binding|cytoplasm|plasma membrane|response to osmotic stress|response to cold|response to water deprivation|response to salt stress|abscisic acid-activated signaling pathway|pollen tube growth|calcium-mediated signaling|kinase binding|pollen tube	--	--
CSS0047214	2	1.66819	2.15054e-110	6.96514e-108	Expansin-like	--	--	--	--	--
CSS0031131	1	0.657972	3.42044e-56	4.5359e-54	Bax inhibitor like	--	GO:0000038,GO:0005635,GO:0005737,GO:0005783,GO:0005789,GO:0006983,GO:0009414,GO:0016021,GO:0043066,GO:0043069	very long-chain fatty acid metabolic process|nuclear envelope|cytoplasm|endoplasmic reticulum|endoplasmic reticulum membrane|ER overload response|response to water deprivation|integral component of membrane|negative regulation of apoptotic process|negative regulation of programmed cell death	--	--
CSS0045630	2	0.890291	6.32588e-10	1.45412e-08	RGG repeats nuclear RNA binding protein A-like	--	GO:0003723,GO:0005634,GO:0009416,GO:0048471	RNA binding|nucleus|response to light stimulus|perinuclear region of cytoplasm	--	--
CSS0009327	2	0.962515	2.21904e-87	5.28853e-85	ERF transcription factor	AP2/ERF-ERF	GO:0003677,GO:0003700,GO:0005634,GO:0006952,GO:0009873,GO:0010087,GO:0010200,GO:0051301	DNA binding|DNA-binding transcription factor activity|nucleus|defense response|ethylene-activated signaling pathway|phloem or xylem histogenesis|response to chitin|cell division	--	--
CSS0019121	1	0.976534	1.21185e-32	8.58745e-31	G-type lectin S-receptor-like serine/threonine-protein kinase	--	GO:0004674,GO:0005524,GO:0005886,GO:0006468,GO:0006952,GO:0016021,GO:0030246	protein serine/threonine kinase activity|ATP binding|plasma membrane|protein phosphorylation|defense response|integral component of membrane|carbohydrate binding	--	--
CSS0000733	2	1.9156	0.000102425	0.00126312	ERF transcription factor	AP2/ERF-ERF	GO:0003677,GO:0003700,GO:0005634,GO:0006952,GO:0009873,GO:0010087,GO:0010200,GO:0051301	DNA binding|DNA-binding transcription factor activity|nucleus|defense response|ethylene-activated signaling pathway|phloem or xylem histogenesis|response to chitin|cell division	--	--
CSS0033108	2	0.867486	7.47973e-05	0.000946676	Palmitoyl-protein like	--	GO:0002084,GO:0005773,GO:0005783,GO:0005789,GO:0006487,GO:0007035,GO:0008474,GO:0008610,GO:0030148,GO:0030176,GO:0047874	protein depalmitoylation|vacuole|endoplasmic reticulum|endoplasmic reticulum membrane|protein N-linked glycosylation|vacuolar acidification|palmitoyl-(protein) hydrolase activity|lipid biosynthetic process|sphingolipid biosynthetic process|integral component of endoplasmic reticulum membrane|dolichyldiphosphatase activity	ko00062	Fatty acid elongation
CSS0009086	2	1.01014	0.000944616	0.00967303	Classical arabinogalactan protein	--	--	--	--	--
CSS0028896	2	0.850991	4.63395e-19	1.85818e-17	Transcription factor MYB1R1 like	MYB-related	GO:0000122,GO:0000976,GO:0003700,GO:0005634,GO:0009646,GO:0009651,GO:0009723,GO:0009733,GO:0009737,GO:0009739,GO:0009744,GO:0009751,GO:0009753,GO:0010150,GO:0010252,GO:0030307,GO:0045892,GO:0046686,GO:0046872,GO:0048527,GO:0090697,GO:2000469	negative regulation of transcription by RNA polymerase II|transcription regulatory region sequence-specific DNA binding|DNA-binding transcription factor activity|nucleus|response to absence of light|response to salt stress|response to ethylene|response to auxin|response to abscisic acid|response to gibberellin|response to sucrose|response to salicylic acid|response to jasmonic acid|leaf senescenc…	--	--
CSS0007152	2	0.933042	6.21426e-07	1.04938e-05	uncharacterized protein Pyn_12319	--	--	--	--	--
CSS0041030	2	0.944497	0.000156283	0.00186538	Formyltetrahydrofolate deformylase	--	GO:0005739,GO:0006189,GO:0006730,GO:0008864,GO:0009853,GO:0016742,GO:0046653	mitochondrion|'de novo' IMP biosynthetic process|one-carbon metabolic process|formyltetrahydrofolate deformylase activity|photorespiration|hydroxymethyl-, formyl- and related transferase activity|tetrahydrofolate metabolic process	ko00630,ko00670	Glyoxylate and dicarboxylate metabolism|One carbon pool by folate
CSS0025088	1	0.986098	8.13139e-13	2.31719e-11	Metalloendoproteinase	--	GO:0004222,GO:0005886,GO:0008270,GO:0031012,GO:0031225	metalloendopeptidase activity|plasma membrane|zinc ion binding|extracellular matrix|anchored component of membrane	--	--
CSS0034933	1	1.13448	3.1249e-05	0.00041924	Glucuronosyltransferase	--	GO:0006486,GO:0016021,GO:0016757,GO:0046872	protein glycosylation|integral component of membrane|transferase activity, transferring glycosyl groups|metal ion binding	--	--
CSS0029742	1	0.969557	6.0316e-09	1.26608e-07	Glucuronosyltransferase	--	GO:0006486,GO:0016021,GO:0016757,GO:0046872	protein glycosylation|integral component of membrane|transferase activity, transferring glycosyl groups|metal ion binding	--	--
CSS0035066	2	0.890092	6.54698e-06	9.75482e-05	autophagy-related protein 8f	--	GO:0000421,GO:0005874,GO:0006914,GO:0006995,GO:0015031,GO:0031410	autophagosome membrane|microtubule|autophagy|cellular response to nitrogen starvation|protein transport|cytoplasmic vesicle	--	--
CSS0044555	2	0.843781	4.18014e-10	9.74177e-09	unnamed protein product, partial	--	--	--	--	--
CSS0037930	1	0.991727	1.10002e-05	0.000158569	Trehalose-phosphate phosphatase	--	GO:0004805,GO:0005992	trehalose-phosphatase activity|trehalose biosynthetic process	ko00500	Starch and sucrose metabolism
CSS0023019	2	0.942097	0.000107231	0.00131757	Transaldolase	--	GO:0004801,GO:0005622,GO:0005634,GO:0005737,GO:0005975,GO:0006098,GO:0009052	sedoheptulose-7-phosphate:D-glyceraldehyde-3-phosphate glyceronetransferase activity|intracellular|nucleus|cytoplasm|carbohydrate metabolic process|pentose-phosphate shunt|pentose-phosphate shunt, non-oxidative branch	ko00030	Pentose phosphate pathway
CSS0007290	2	1.1633	3.53461e-12	9.59109e-11	invertase 5	--	GO:0004575,GO:0005775,GO:0005985,GO:0016021	sucrose alpha-glucosidase activity|vacuolar lumen|sucrose metabolic process|integral component of membrane	ko00052,ko00500	Galactose metabolism|Starch and sucrose metabolism
CSS0034738	2	0.9474	8.69851e-05	0.00108839	Serine/threonine-protein kinase MRCK alpha like	--	--	--	--	--
CSS0001961	2	7.56957	7.22262e-47	7.63437e-45	putative invertase inhibitor InvInh3	--	GO:0004857	enzyme inhibitor activity	--	--
CSS0045584	1	0.952876	1.57048e-06	2.52863e-05	MICOS complex subunit mic25a like	--	--	--	--	--
CSS0028192	2	1.045	3.67638e-18	1.42228e-16	Homeodomain-interacting protein kinase	--	--	--	--	--
CSS0026380	2	0.90961	4.03884e-09	8.61386e-08	Filaggrin like	--	--	--	--	--
CSS0013709	2	0.857894	0.000744223	0.00779314	PREDICTED: E3 ubiquitin-protein ligase At1g12760 isoform X2	--	GO:0004842,GO:0005774,GO:0016021,GO:0046872	ubiquitin-protein transferase activity|vacuolar membrane|integral component of membrane|metal ion binding	--	--
CSS0022914	2	0.783517	6.64792e-21	2.91062e-19	Bifunctional UDP-glucose 4-epimerase and UDP-xylose 4-epimerase	--	GO:0003978,GO:0005829,GO:0005886,GO:0006012,GO:0033358,GO:0045227,GO:0050373,GO:0071555	UDP-glucose 4-epimerase activity|cytosol|plasma membrane|galactose metabolic process|UDP-L-arabinose biosynthetic process|capsule polysaccharide biosynthetic process|UDP-arabinose 4-epimerase activity|cell wall organization	ko00052,ko00520	Galactose metabolism|Amino sugar and nucleotide sugar metabolism
CSS0038699	2	1.7557	2.0526e-37	1.71986e-35	thaumatin-like protein 1	--	--	--	--	--
CSS0033515	2	0.819937	4.95792e-14	1.5191e-12	Transcription initiation factor IIE, beta subunit	--	GO:0003677,GO:0005634,GO:0005673,GO:0005730,GO:0006367,GO:0016251	DNA binding|nucleus|transcription factor TFIIE complex|nucleolus|transcription initiation from RNA polymerase II promoter|RNA polymerase II general transcription initiation factor activity	ko03022	Basal transcription factors
CSS0023348	1	0.951391	0.000620827	0.00661199	glutathione peroxidase	--	GO:0004602,GO:0005737,GO:0006979,GO:0047066	glutathione peroxidase activity|cytoplasm|response to oxidative stress|phospholipid-hydroperoxide glutathione peroxidase activity	ko00480,ko00590	Glutathione metabolism|Arachidonic acid metabolism
CSS0042395	1	1.0216	0.0001234	0.00150206	Serine/threonine-protein kinase	--	GO:0004674,GO:0005524,GO:0005886,GO:0009506,GO:0009742	protein serine/threonine kinase activity|ATP binding|plasma membrane|plasmodesma|brassinosteroid mediated signaling pathway	ko04075	Plant hormone signal transduction
CSS0023864	2	0.911819	2.79629e-08	5.47183e-07	Glutathione S-transferase	--	GO:0004364,GO:0004601,GO:0005634,GO:0005737,GO:0005777,GO:0009407	glutathione transferase activity|peroxidase activity|nucleus|cytoplasm|peroxisome|toxin catabolic process	ko00480	Glutathione metabolism
CSS0043939	2	0.855402	3.85393e-08	7.41508e-07	Glutamate--cysteine ligase	--	GO:0004357,GO:0005524,GO:0006750,GO:0009507	glutamate-cysteine ligase activity|ATP binding|glutathione biosynthetic process|chloroplast	--	--
CSS0006638	2	1.62418	1.83821e-39	1.63226e-37	aquaporin protein AQU19	--	GO:0005773,GO:0005886,GO:0006833,GO:0009414,GO:0009506,GO:0009507,GO:0015250,GO:0016020,GO:0016021	vacuole|plasma membrane|water transport|response to water deprivation|plasmodesma|chloroplast|water channel activity|membrane|integral component of membrane	--	--
CSS0045421	2	0.957729	5.47184e-06	8.22812e-05	Short-chain dehydrogenase	--	GO:0005886,GO:0009507,GO:0009706,GO:0009941,GO:0015031,GO:0016491	plasma membrane|chloroplast|chloroplast inner membrane|chloroplast envelope|protein transport|oxidoreductase activity	--	--
CSS0006932	1	1.05858	1.48756e-07	2.68905e-06	E3 ubiquitin-protein like	--	GO:0004842,GO:0010200,GO:0016567,GO:0046686,GO:0046872	ubiquitin-protein transferase activity|response to chitin|protein ubiquitination|response to cadmium ion|metal ion binding	--	--
CSS0025639	2	0.725002	1.52469e-16	5.43649e-15	conserved hypothetical protein	--	GO:0005774,GO:0071458,GO:0071782,GO:0071786	vacuolar membrane|integral component of cytoplasmic side of endoplasmic reticulum membrane|endoplasmic reticulum tubular network|endoplasmic reticulum tubular network organization	--	--
CSS0008866	2	0.770773	3.16867e-11	7.99687e-10	vacuolar ATP synthase subunit	--	GO:0015991,GO:0033178,GO:0046961	ATP hydrolysis coupled proton transport|proton-transporting two-sector ATPase complex, catalytic domain|proton-transporting ATPase activity, rotational mechanism	ko00190,ko04145	Oxidative phosphorylation|Phagosome
CSS0028787	2	0.419723	8.19605e-112	2.70657e-109	ubiquitin-conjugating enzyme E2-17 kDa-like	--	GO:0005524,GO:0061631	ATP binding|ubiquitin conjugating enzyme activity	--	--
CSS0001232	2	1.01519	2.20379e-20	9.44414e-19	hypothetical protein CR513_53706, partial	--	GO:0005524,GO:0061631	ATP binding|ubiquitin conjugating enzyme activity	--	--
CSS0038774	2	1.01849	1.24008e-12	3.49246e-11	UDP-glucose 4-epimerase/UDP-sulfoquinovose synthase	--	GO:0003978,GO:0006012	UDP-glucose 4-epimerase activity|galactose metabolic process	ko00052,ko00520	Galactose metabolism|Amino sugar and nucleotide sugar metabolism
CSS0043367	1	1.00262	2.87941e-12	7.89806e-11	hypothetical protein CEY00_Acc15580	--	--	--	--	--
CSS0016783	1	0.914117	3.1338e-07	5.45641e-06	Golgin candidate like	--	GO:0000139,GO:0005783,GO:0005794,GO:0005795,GO:0005829,GO:0006886,GO:0006888,GO:0008565,GO:0009791,GO:0012507,GO:0032527,GO:0045056,GO:0048211,GO:0048280,GO:0061025	Golgi membrane|endoplasmic reticulum|Golgi apparatus|Golgi stack|cytosol|intracellular protein transport|ER to Golgi vesicle-mediated transport|protein transporter activity|post-embryonic development|ER to Golgi transport vesicle membrane|protein exit from endoplasmic reticulum|transcytosis|Golgi vesicle docking|vesicle fusion with Golgi apparatus|membrane fusion	--	--
CSS0036207	1	0.992146	1.47077e-24	7.52892e-23	luminal-binding protein	--	GO:0005524,GO:0005788	ATP binding|endoplasmic reticulum lumen	ko03060,ko04141	Protein export|Protein processing in endoplasmic reticulum
CSS0018884	1	0.936026	1.8714e-37	1.57064e-35	luminal-binding protein	--	GO:0005524,GO:0005788	ATP binding|endoplasmic reticulum lumen	ko03060,ko04141	Protein export|Protein processing in endoplasmic reticulum
CSS0048124	2	0.998045	1.4229e-06	2.30571e-05	PREDICTED: short-chain dehydrogenase TIC 32, chloroplastic	--	GO:0005886,GO:0009507,GO:0009706,GO:0009941,GO:0015031,GO:0016491	plasma membrane|chloroplast|chloroplast inner membrane|chloroplast envelope|protein transport|oxidoreductase activity	--	--
CSS0046176	2	0.880487	2.66055e-11	6.76178e-10	--	--	--	--	--	--
CSS0029916	2	1.01549	7.30671e-06	0.000107976	StAR-related lipid transfer protein like	--	--	--	--	--
CSS0015169	2	0.884949	6.71967e-06	9.9915e-05	Protein of unknown function DUF177 protein	--	GO:0009507,GO:0042254,GO:0042644	chloroplast|ribosome biogenesis|chloroplast nucleoid	--	--
CSS0048559	2	0.879104	1.51875e-20	6.56414e-19	Outer envelope pore protein like	--	GO:0005739,GO:0005741,GO:0005747,GO:0006811,GO:0008320,GO:0009507,GO:0009527,GO:0009707,GO:0015288,GO:0016020,GO:0030943,GO:0042721,GO:0042803,GO:0045039,GO:0046930	mitochondrion|mitochondrial outer membrane|mitochondrial respiratory chain complex I|ion transport|protein transmembrane transporter activity|chloroplast|plastid outer membrane|chloroplast outer membrane|porin activity|membrane|mitochondrion targeting sequence binding|TIM22 mitochondrial import inner membrane insertion complex|protein homodimerization activity|protein import into mitochondrial in…	--	--
CSS0025407	2	0.893164	5.06607e-94	1.31263e-91	polygalacturonase inhibitor-like	--	GO:0005576,GO:0005618,GO:0005794,GO:0009505,GO:0009506,GO:0016020,GO:0090353	extracellular region|cell wall|Golgi apparatus|plant-type cell wall|plasmodesma|membrane|polygalacturonase inhibitor activity	--	--
CSS0007216	2	0.931774	9.22379e-07	1.52597e-05	PHD finger protein	--	GO:0005634,GO:0006325,GO:0035064,GO:0040008,GO:0046872	nucleus|chromatin organization|methylated histone binding|regulation of growth|metal ion binding	--	--
CSS0038103	2	1.02829	2.20247e-15	7.31142e-14	60S ribosomal protein L23	--	GO:0003735,GO:0005730,GO:0006412,GO:0022625,GO:0070180	structural constituent of ribosome|nucleolus|translation|cytosolic large ribosomal subunit|large ribosomal subunit rRNA binding	ko03010	Ribosome
CSS0043330	1	0.987777	6.83592e-05	0.000871964	RRNA biogenesis protein	--	GO:0003676,GO:0005730,GO:0005886,GO:0006364,GO:0006397,GO:0009553,GO:0032040	nucleic acid binding|nucleolus|plasma membrane|rRNA processing|mRNA processing|embryo sac development|small-subunit processome	--	--
CSS0043912	1	0.690824	1.12847e-13	3.39986e-12	NADH-plastoquinone oxidoreductase subunit 5 (plastid)	--	GO:0008137,GO:0009535,GO:0016021,GO:0042773,GO:0048038	NADH dehydrogenase (ubiquinone) activity|chloroplast thylakoid membrane|integral component of membrane|ATP synthesis coupled electron transport|quinone binding	ko00190	Oxidative phosphorylation
CSS0022151	2	0.977654	3.78967e-06	5.82339e-05	PREDICTED: uncharacterized protein At3g61260-like	--	GO:0005886,GO:0009414,GO:0009651,GO:0009737,GO:0010555,GO:0019900,GO:0043621	plasma membrane|response to water deprivation|response to salt stress|response to abscisic acid|response to mannitol|kinase binding|protein self-association	--	--
CSS0003189	2	0.895514	1.98339e-07	3.53977e-06	Exosome complex component like	--	GO:0000175,GO:0000176,GO:0000177,GO:0000178,GO:0000467,GO:0005634,GO:0005730,GO:0005829,GO:0016075,GO:0017091,GO:0034427,GO:0034473,GO:0034475,GO:0034476,GO:0043928,GO:0070478,GO:0070481,GO:0070651,GO:0071028,GO:0071035,GO:0071038,GO:0071042	3'-5'-exoribonuclease activity|nuclear exosome (RNase complex)|cytoplasmic exosome (RNase complex)|exosome (RNase complex)|exonucleolytic trimming to generate mature 3'-end of 5.8S rRNA from tricistronic rRNA transcript (SSU-rRNA, 5.8S rRNA, LSU-rRNA)|nucleus|nucleolus|cytosol|rRNA catabolic process|AU-rich element binding|nuclear-transcribed mRNA catabolic process, exonucleolytic, 3'-5'|U1 snRNA…	--	--
CSS0048610	2	0.981346	5.18541e-08	9.8272e-07	putative proline-rich cell wall protein, partial	--	--	--	--	--
CSS0044933	1	1.10053	2.88584e-32	2.02229e-30	EGF domain-specific O-linked N-acetylglucosamine transferase	--	--	--	--	--
CSS0032923	1	1.02246	8.46828e-26	4.61056e-24	Transcription initiation factor IIB-2	--	GO:0005634,GO:0005737,GO:0006355,GO:0017025,GO:0046872,GO:0070897	nucleus|cytoplasm|regulation of transcription, DNA-templated|TBP-class protein binding|metal ion binding|transcription preinitiation complex assembly	ko03022	Basal transcription factors
CSS0035973	2	0.794136	2.09714e-17	7.83714e-16	Nuclear cap-binding protein like	--	GO:0000339,GO:0000394,GO:0000398,GO:0005634,GO:0005737,GO:0005845,GO:0005846,GO:0016070,GO:0031053,GO:0045292	RNA cap binding|RNA splicing, via endonucleolytic cleavage and ligation|mRNA splicing, via spliceosome|nucleus|cytoplasm|mRNA cap binding complex|nuclear cap binding complex|RNA metabolic process|primary miRNA processing|mRNA cis splicing, via spliceosome	ko03013,ko03015,ko03040	RNA transport|mRNA surveillance pathway|Spliceosome
CSS0026365	2	0.907717	3.98066e-14	1.23086e-12	S-formylglutathione hydrolase	--	GO:0005829,GO:0018738,GO:0046294,GO:0046686,GO:0048046,GO:0052689	cytosol|S-formylglutathione hydrolase activity|formaldehyde catabolic process|response to cadmium ion|apoplast|carboxylic ester hydrolase activity	--	--
CSS0038453	2	0.967491	5.5321e-05	0.000715956	DNA repair protein recA 2 like	--	GO:0000002,GO:0003697,GO:0005524,GO:0005739,GO:0006281,GO:0006310,GO:0008094,GO:0009408	mitochondrial genome maintenance|single-stranded DNA binding|ATP binding|mitochondrion|DNA repair|DNA recombination|DNA-dependent ATPase activity|response to heat	--	--
CSS0016894	1	0.962099	3.34688e-05	0.000447358	Titin like	--	GO:0005516,GO:0005886,GO:0006952	calmodulin binding|plasma membrane|defense response	--	--
CSS0025882	2	1.09868	1.75222e-07	3.1461e-06	Methyltransferase	--	GO:0003729,GO:0005737,GO:0008168,GO:0008757,GO:0055088	mRNA binding|cytoplasm|methyltransferase activity|S-adenosylmethionine-dependent methyltransferase activity|lipid homeostasis	--	--
CSS0023588	2	0.889701	1.61817e-06	2.60292e-05	Ganglioside-induced differentiation-associated protein	--	--	--	--	--
CSS0047486	1	0.787946	1.54278e-07	2.7819e-06	hypothetical protein CEY00_Acc03909	--	GO:0000184,GO:0000932,GO:0004540,GO:0005634,GO:0005697,GO:0005737,GO:0006952,GO:0007004,GO:0007275,GO:0040008,GO:0042162,GO:0043021,GO:0043487,GO:0051321,GO:0070034,GO:0090306	nuclear-transcribed mRNA catabolic process, nonsense-mediated decay|P-body|ribonuclease activity|nucleus|telomerase holoenzyme complex|cytoplasm|defense response|telomere maintenance via telomerase|multicellular organism development|regulation of growth|telomeric DNA binding|ribonucleoprotein complex binding|regulation of RNA stability|meiotic cell cycle|telomerase RNA binding|spindle assembly in…	ko03015	mRNA surveillance pathway
CSS0041228	2	0.952396	0.000121432	0.00148125	Stomatal closure-related actin-binding protein	--	GO:0003779,GO:0005737,GO:0005856,GO:0007015,GO:0010119	actin binding|cytoplasm|cytoskeleton|actin filament organization|regulation of stomatal movement	--	--
CSS0036230	2	0.538137	6.39131e-22	2.93032e-20	R3H domain-containing protein	--	--	--	--	--
CSS0001529	1	0.879695	0.000869923	0.00897811	hypothetical protein DCAR_026599	--	GO:0000245,GO:0003729,GO:0005634,GO:0005686,GO:0071004,GO:0071013,GO:0071014	spliceosomal complex assembly|mRNA binding|nucleus|U2 snRNP|U2-type prespliceosome|catalytic step 2 spliceosome|post-mRNA release spliceosomal complex	ko03040	Spliceosome
CSS0037844	1	1.12414	2.61721e-14	8.23488e-13	Uro-adherence factor A like, partial	--	--	--	--	--
CSS0047384	2	0.878684	1.85359e-22	8.69569e-21	NADH--cytochrome b5 reductase	--	GO:0004128,GO:0005741,GO:0005783,GO:0005886,GO:0009505,GO:0016021,GO:0022900	cytochrome-b5 reductase activity, acting on NAD(P)H|mitochondrial outer membrane|endoplasmic reticulum|plasma membrane|plant-type cell wall|integral component of membrane|electron transport chain	ko00520	Amino sugar and nucleotide sugar metabolism
CSS0009312	1	4.0355	3.62569e-105	1.09693e-102	Peroxidase	--	GO:0004601,GO:0005576,GO:0005618,GO:0006979,GO:0009505,GO:0009506,GO:0016020,GO:0020037,GO:0042744,GO:0046872	peroxidase activity|extracellular region|cell wall|response to oxidative stress|plant-type cell wall|plasmodesma|membrane|heme binding|hydrogen peroxide catabolic process|metal ion binding	ko00940	Phenylpropanoid biosynthesis
CSS0017484	1	1.97593	2.66831e-14	8.38409e-13	Peroxidase	--	GO:0004601,GO:0005576,GO:0005618,GO:0006979,GO:0009505,GO:0009506,GO:0016020,GO:0020037,GO:0042744,GO:0046872	peroxidase activity|extracellular region|cell wall|response to oxidative stress|plant-type cell wall|plasmodesma|membrane|heme binding|hydrogen peroxide catabolic process|metal ion binding	ko00940	Phenylpropanoid biosynthesis
CSS0040539	1	2.01934	7.19999e-41	6.54279e-39	Peroxidase	--	GO:0004601,GO:0005576,GO:0006979,GO:0009505,GO:0009506,GO:0020037,GO:0042744,GO:0046872	peroxidase activity|extracellular region|response to oxidative stress|plant-type cell wall|plasmodesma|heme binding|hydrogen peroxide catabolic process|metal ion binding	ko00940	Phenylpropanoid biosynthesis
CSS0045892	1	1.29082	1.66778e-56	2.23513e-54	Peroxidase	--	GO:0004601,GO:0005576,GO:0006979,GO:0009505,GO:0009506,GO:0020037,GO:0042744,GO:0046872	peroxidase activity|extracellular region|response to oxidative stress|plant-type cell wall|plasmodesma|heme binding|hydrogen peroxide catabolic process|metal ion binding	ko00940	Phenylpropanoid biosynthesis
CSS0004634	1	0.83879	0.000268127	0.00307889	cationic amino acid transporter 2	--	GO:0005773,GO:0005774,GO:0006865,GO:0009705,GO:0016021,GO:0022857,GO:0080144	vacuole|vacuolar membrane|amino acid transport|plant-type vacuole membrane|integral component of membrane|transmembrane transporter activity|amino acid homeostasis	--	--
CSS0049440	2	0.736466	2.32982e-23	1.13514e-21	FH protein interacting protein	--	GO:0016567,GO:0051260	protein ubiquitination|protein homooligomerization	--	--
CSS0013920	1	1.125	0.000519846	0.00565329	polyprotein	--	GO:0003677,GO:0003723,GO:0003887,GO:0003964,GO:0004190,GO:0004519,GO:0005634,GO:0006310,GO:0015074,GO:0046872	DNA binding|RNA binding|DNA-directed DNA polymerase activity|RNA-directed DNA polymerase activity|aspartic-type endopeptidase activity|endonuclease activity|nucleus|DNA recombination|DNA integration|metal ion binding	--	--
CSS0031945	2	0.744411	1.61291e-05	0.000226682	hypothetical protein CUMW_041240	--	GO:0005524,GO:0016567,GO:0016740	ATP binding|protein ubiquitination|transferase activity	ko04120	Ubiquitin mediated proteolysis
CSS0004374	2	0.809709	9.26761e-09	1.90035e-07	Membrin-11 like	--	GO:0000139,GO:0000149,GO:0005484,GO:0005789,GO:0005794,GO:0005829,GO:0006623,GO:0006888,GO:0006891,GO:0006896,GO:0012507,GO:0016021,GO:0031201,GO:0031902,GO:0042147,GO:0048280	Golgi membrane|SNARE binding|SNAP receptor activity|endoplasmic reticulum membrane|Golgi apparatus|cytosol|protein targeting to vacuole|ER to Golgi vesicle-mediated transport|intra-Golgi vesicle-mediated transport|Golgi to vacuole transport|ER to Golgi transport vesicle membrane|integral component of membrane|SNARE complex|late endosome membrane|retrograde transport, endosome to Golgi|vesicle fus…	ko04130	SNARE interactions in vesicular transport
CSS0025629	2	0.935445	6.61354e-86	1.53279e-83	beta-glucosidase 1 GH3 family	--	GO:0005576,GO:0008422,GO:0030245,GO:0102483	extracellular region|beta-glucosidase activity|cellulose catabolic process|scopolin beta-glucosidase activity	ko00460,ko00500,ko00940	Cyanoamino acid metabolism|Starch and sucrose metabolism|Phenylpropanoid biosynthesis
CSS0042096	1	0.969431	2.02107e-06	3.21318e-05	putative glycosyltransferase, partial	--	GO:0000139,GO:0006486,GO:0016021,GO:0016757,GO:0071555	Golgi membrane|protein glycosylation|integral component of membrane|transferase activity, transferring glycosyl groups|cell wall organization	--	--
CSS0048545	2	0.930317	6.6186e-06	9.85572e-05	--	--	--	--	--	--
CSS0012663	2	0.869431	0.000152029	0.00181891	unnamed protein product, partial	--	GO:0004458,GO:0005524,GO:0005739,GO:0008720,GO:0008891,GO:0019154,GO:0042802,GO:0050660,GO:0051596,GO:0071949,GO:1903457	D-lactate dehydrogenase (cytochrome) activity|ATP binding|mitochondrion|D-lactate dehydrogenase activity|glycolate oxidase activity|glycolate dehydrogenase activity|identical protein binding|flavin adenine dinucleotide binding|methylglyoxal catabolic process|FAD binding|lactate catabolic process	ko00620	Pyruvate metabolism
CSS0029343	2	0.812691	1.10849e-07	2.02848e-06	unnamed protein product, partial	--	GO:0004458,GO:0005524,GO:0005739,GO:0008720,GO:0008891,GO:0019154,GO:0042802,GO:0050660,GO:0051596,GO:0071949,GO:1903457	D-lactate dehydrogenase (cytochrome) activity|ATP binding|mitochondrion|D-lactate dehydrogenase activity|glycolate oxidase activity|glycolate dehydrogenase activity|identical protein binding|flavin adenine dinucleotide binding|methylglyoxal catabolic process|FAD binding|lactate catabolic process	ko00620	Pyruvate metabolism
CSS0004492	2	1.25074	1.45943e-09	3.23838e-08	Carboxylesterase	--	GO:0052689	carboxylic ester hydrolase activity	--	--
CSS0040064	2	1.71677	4.30327e-14	1.32575e-12	probable carboxylesterase 15	--	GO:0052689	carboxylic ester hydrolase activity	--	--
CSS0025933	2	0.788297	3.74982e-95	9.8677e-93	phosphatidylglycerol/phosphatidylinositol transfer protein precursor	--	GO:0005794,GO:0031410,GO:0032366	Golgi apparatus|cytoplasmic vesicle|intracellular sterol transport	--	--
CSS0041191	2	0.920066	0.000409256	0.00454399	ALK tyrosine kinase receptor scd-2 like	--	--	--	--	--
CSS0049475	1	1.18347	2.24884e-166	1.19603e-163	hypothetical protein CEY00_Acc16959	--	GO:0005774,GO:0005794,GO:0005886,GO:0009506,GO:0009611,GO:0009617,GO:0009751,GO:0009816,GO:0016021,GO:0042742,GO:0046658,GO:0051607	vacuolar membrane|Golgi apparatus|plasma membrane|plasmodesma|response to wounding|response to bacterium|response to salicylic acid|defense response to bacterium, incompatible interaction|integral component of membrane|defense response to bacterium|anchored component of plasma membrane|defense response to virus	--	--
CSS0036377	2	0.574932	3.76289e-66	6.07413e-64	hypothetical protein CRG98_042067	--	GO:0005634,GO:0005829,GO:0006301,GO:0061631,GO:0070534	nucleus|cytosol|postreplication repair|ubiquitin conjugating enzyme activity|protein K63-linked ubiquitination	--	--
CSS0029222	1	0.921825	5.05762e-34	3.77454e-32	MLO-like protein 6	--	GO:0005516,GO:0005886,GO:0009817,GO:0016021	calmodulin binding|plasma membrane|defense response to fungus, incompatible interaction|integral component of membrane	--	--
CSS0023307	2	0.948126	0.000138331	0.00166925	YrdC domain-containing protein	--	GO:0000049,GO:0000781,GO:0002949,GO:0003677,GO:0003725,GO:0005524,GO:0005634,GO:0005737,GO:0005829,GO:0006417,GO:0006450,GO:0016779,GO:0061710	tRNA binding|chromosome, telomeric region|tRNA threonylcarbamoyladenosine modification|DNA binding|double-stranded RNA binding|ATP binding|nucleus|cytoplasm|cytosol|regulation of translation|regulation of translational fidelity|nucleotidyltransferase activity|L-threonylcarbamoyladenylate synthase	--	--
CSS0007332	1	0.912116	9.58003e-07	1.58232e-05	Double-stranded RNA-binding protein	--	GO:0003725,GO:0005737,GO:0035196,GO:0070919	double-stranded RNA binding|cytoplasm|production of miRNAs involved in gene silencing by miRNA|production of siRNA involved in chromatin silencing by small RNA	--	--
CSS0043917	2	0.960633	1.73218e-06	2.77308e-05	CASP-like protein	--	GO:0005886,GO:0016021	plasma membrane|integral component of membrane	--	--
CSS0031057	1	0.950622	9.37052e-11	2.27727e-09	Zinc finger protein with KRAB and SCAN domains 5 like	--	--	--	--	--
CSS0047519	1	1.06984	9.59877e-39	8.31866e-37	Protein CNGC15c like	--	GO:0005249,GO:0016021,GO:0031965,GO:0044325	voltage-gated potassium channel activity|integral component of membrane|nuclear membrane|ion channel binding	ko04626	Plant-pathogen interaction
CSS0025667	2	0.989192	2.13373e-08	4.23934e-07	Von Willebrand factor, type A protein	--	GO:0005886,GO:0009630,GO:0016567,GO:0046872,GO:0048364,GO:0061630	plasma membrane|gravitropism|protein ubiquitination|metal ion binding|root development|ubiquitin protein ligase activity	--	--
CSS0012038	1	0.93056	4.38386e-05	0.000576659	Helicase protein	--	GO:0004386,GO:0005524,GO:0005634,GO:0006342,GO:0006344,GO:0031047,GO:0042803,GO:0046872,GO:0051537	helicase activity|ATP binding|nucleus|chromatin silencing|maintenance of chromatin silencing|gene silencing by RNA|protein homodimerization activity|metal ion binding|2 iron, 2 sulfur cluster binding	--	--
CSS0019309	1	0.985605	2.46269e-17	9.17434e-16	P-loop NTPase domain-containing protein	--	GO:0010264	myo-inositol hexakisphosphate biosynthetic process	--	--
CSS0042525	1	0.903993	0.000372753	0.00417128	Dolichol kinase	--	GO:0004168,GO:0005783,GO:0006486,GO:0009555,GO:0010483,GO:0030176,GO:0043048	dolichol kinase activity|endoplasmic reticulum|protein glycosylation|pollen development|pollen tube reception|integral component of endoplasmic reticulum membrane|dolichyl monophosphate biosynthetic process	ko00510	N-Glycan biosynthesis
CSS0035800	2	0.922056	5.82767e-20	2.46809e-18	E3 ubiquitin-protein ligase RZFP34	--	GO:0005634,GO:0005783,GO:0008270,GO:0016567,GO:0016740,GO:1902456	nucleus|endoplasmic reticulum|zinc ion binding|protein ubiquitination|transferase activity|regulation of stomatal opening	ko04120	Ubiquitin mediated proteolysis
CSS0027319	2	2.07949	3.92384e-186	2.50952e-183	aquaporin protein TIP1-1	--	GO:0005774,GO:0015250,GO:0016021	vacuolar membrane|water channel activity|integral component of membrane	--	--
CSS0007835	2	0.981944	2.41894e-51	2.83566e-49	PREDICTED: zinc finger protein ZAT5	C2H2	GO:0003700,GO:0005634,GO:0006355,GO:0043565,GO:0046872	DNA-binding transcription factor activity|nucleus|regulation of transcription, DNA-templated|sequence-specific DNA binding|metal ion binding	--	--
CSS0025262	2	0.945234	2.20612e-07	3.91928e-06	cyclin-dependent kinases regulatory subunit 1-like isoform X2	--	GO:0000278,GO:0000307,GO:0005737,GO:0007346,GO:0019005,GO:0019901,GO:0042023,GO:0042393,GO:0043130,GO:0045737,GO:0051301,GO:0051726,GO:0061575	mitotic cell cycle|cyclin-dependent protein kinase holoenzyme complex|cytoplasm|regulation of mitotic cell cycle|SCF ubiquitin ligase complex|protein kinase binding|DNA endoreduplication|histone binding|ubiquitin binding|positive regulation of cyclin-dependent protein serine/threonine kinase activity|cell division|regulation of cell cycle|cyclin-dependent protein serine/threonine kinase activator…	--	--
CSS0050067	2	1.05222	0.000116404	0.00142335	Aspartic proteinase-like protein	--	GO:0004190,GO:0005886,GO:0006508,GO:0030163,GO:0031225,GO:0046658	aspartic-type endopeptidase activity|plasma membrane|proteolysis|protein catabolic process|anchored component of membrane|anchored component of plasma membrane	--	--
CSS0015342	2	0.925951	0.000318252	0.0036045	UDP-D-apiose/UDP-D-xylose synthase	--	GO:0003824,GO:0005737,GO:0005829,GO:0048046,GO:0050662,GO:0071555	catalytic activity|cytoplasm|cytosol|apoplast|coenzyme binding|cell wall organization	ko00520	Amino sugar and nucleotide sugar metabolism
CSS0023799	2	0.796116	0.000577674	0.00621529	PREDICTED: splicing factor U2af small subunit B-like	--	GO:0000398,GO:0003677,GO:0005634,GO:0005681,GO:0016607,GO:0030628,GO:0046872,GO:0048573,GO:0089701	mRNA splicing, via spliceosome|DNA binding|nucleus|spliceosomal complex|nuclear speck|pre-mRNA 3'-splice site binding|metal ion binding|photoperiodism, flowering|U2AF	ko03040	Spliceosome
CSS0042685	1	0.938352	0.00015357	0.00183517	Myb-like protein	--	--	--	--	--
CSS0041089	1	1.59696	3.391e-29	2.09548e-27	Cytochrome P450 94C1 like	--	GO:0005506,GO:0005789,GO:0009611,GO:0016021,GO:0018685,GO:0020037,GO:0043231	iron ion binding|endoplasmic reticulum membrane|response to wounding|integral component of membrane|alkane 1-monooxygenase activity|heme binding|intracellular membrane-bounded organelle	--	--
CSS0006567	1	1.23684	3.96691e-11	9.92709e-10	Zinc finger protein	C2H2	GO:0003676,GO:0003700,GO:0005634,GO:0006355,GO:0010468,GO:0046872	nucleic acid binding|DNA-binding transcription factor activity|nucleus|regulation of transcription, DNA-templated|regulation of gene expression|metal ion binding	--	--
CSS0045962	2	0.685134	3.16464e-14	9.88828e-13	60S ribosomal protein like	--	GO:0003723,GO:0003735,GO:0006412,GO:0015934	RNA binding|structural constituent of ribosome|translation|large ribosomal subunit	ko03010	Ribosome
CSS0003287	2	0.902282	1.71702e-12	4.79825e-11	UPF0058 protein	--	--	--	--	--
CSS0028109	2	0.891825	8.69718e-06	0.000126965	Ribonucleoside-diphosphate reductase subunit alpha like	--	--	--	--	--
CSS0031216	2	0.90891	2.71549e-06	4.24243e-05	F-box protein	--	--	--	--	--
CSS0045008	2	1.20223	1.27797e-05	0.000182503	16kda membrane protein	--	GO:0009507,GO:0009522,GO:0009535,GO:0009579,GO:0009767,GO:0009768,GO:0016021	chloroplast|photosystem I|chloroplast thylakoid membrane|thylakoid|photosynthetic electron transport chain|photosynthesis, light harvesting in photosystem I|integral component of membrane	ko00195	Photosynthesis
CSS0031098	2	0.93602	3.00455e-06	4.6738e-05	nitrilase	--	GO:0005886,GO:0006807,GO:0047427,GO:0047558	plasma membrane|nitrogen compound metabolic process|cyanoalanine nitrilase activity|3-cyanoalanine hydratase activity	ko00460	Cyanoamino acid metabolism
CSS0027967	2	0.917399	1.84454e-05	0.000256949	nitrilase	--	GO:0005886,GO:0006807,GO:0047427,GO:0047558	plasma membrane|nitrogen compound metabolic process|cyanoalanine nitrilase activity|3-cyanoalanine hydratase activity	ko00460	Cyanoamino acid metabolism
CSS0030046	2	0.963656	3.00326e-05	0.000404423	alcohol dehydrogenase	--	GO:0102960	momilactone-A synthase activity	--	--
CSS0002489	2	0.730697	7.76095e-08	1.44162e-06	Protein IQ-DOMAIN like	--	GO:0005516,GO:0005634,GO:0005737,GO:0005874,GO:0008017	calmodulin binding|nucleus|cytoplasm|microtubule|microtubule binding	--	--
CSS0028191	2	0.938055	1.85978e-48	2.05165e-46	Phosphatidylglycerol/phosphatidylinositol transfer protein	--	GO:0005622,GO:0032366	intracellular|intracellular sterol transport	--	--
CSS0023574	2	0.827564	2.06751e-20	8.88273e-19	Pericentriolar material 1 protein	--	--	--	--	--
CSS0013797	2	0.907357	1.12008e-06	1.83621e-05	PREDICTED: stomatal closure-related actin-binding protein 1	--	GO:0003779,GO:0005737,GO:0005856,GO:0007015,GO:0010119	actin binding|cytoplasm|cytoskeleton|actin filament organization|regulation of stomatal movement	--	--
CSS0026559	2	0.907479	3.66331e-20	1.56457e-18	PREDICTED: 60S ribosomal protein L44-like	--	GO:0003735,GO:0005840,GO:0006412	structural constituent of ribosome|ribosome|translation	ko03010	Ribosome
CSS0038674	1	1.75303	2.72423e-22	1.27446e-20	PREDICTED: miraculin-like	--	--	--	--	--
CSS0030185	1	1.28588	5.22191e-126	2.04525e-123	Proteinase inhibitor I3, Kunitz legume	--	--	--	--	--
CSS0021540	1	1.536	5.78605e-212	4.23681e-209	Proteinase inhibitor I3, Kunitz legume	--	--	--	--	--
CSS0003160	1	0.874126	6.13318e-59	8.80338e-57	Proteinase inhibitor I3, Kunitz legume	--	--	--	--	--
CSS0026371	2	0.893835	1.22904e-11	3.20585e-10	Multiple organellar RNA editing factor 2 like	--	GO:0005739,GO:0006397,GO:0009507,GO:0016554,GO:0042803,GO:0046983,GO:0080156	mitochondrion|mRNA processing|chloroplast|cytidine to uridine editing|protein homodimerization activity|protein dimerization activity|mitochondrial mRNA modification	--	--
CSS0001486	2	0.948808	1.54458e-05	0.000217806	Rho GDP-dissociation inhibitor like	--	GO:0005094,GO:0005096,GO:0005737,GO:0009932,GO:0010053	Rho GDP-dissociation inhibitor activity|GTPase activator activity|cytoplasm|cell tip growth|root epidermal cell differentiation	--	--
CSS0038060	2	0.885312	1.10965e-08	2.25613e-07	60S ribosomal protein like, partial	--	GO:0003723,GO:0003729,GO:0003735,GO:0005730,GO:0005773,GO:0005774,GO:0005783,GO:0005829,GO:0006412,GO:0009506,GO:0009507,GO:0022625,GO:0022626,GO:0042273,GO:0042788	RNA binding|mRNA binding|structural constituent of ribosome|nucleolus|vacuole|vacuolar membrane|endoplasmic reticulum|cytosol|translation|plasmodesma|chloroplast|cytosolic large ribosomal subunit|cytosolic ribosome|ribosomal large subunit biogenesis|polysomal ribosome	ko03010	Ribosome
CSS0031432	2	0.932395	4.90864e-06	7.42319e-05	PREDICTED: H/ACA ribonucleoprotein complex subunit 3-like protein	--	GO:0005730,GO:0010197,GO:0015030,GO:0031118,GO:0031120,GO:0031429,GO:0034513,GO:0070034,GO:0090661	nucleolus|polar nucleus fusion|Cajal body|rRNA pseudouridine synthesis|snRNA pseudouridine synthesis|box H/ACA snoRNP complex|box H/ACA snoRNA binding|telomerase RNA binding|box H/ACA telomerase RNP complex	ko03008	Ribosome biogenesis in eukaryotes
CSS0001414	2	0.878876	1.02192e-07	1.87483e-06	Protein root UVB sensitive like	--	GO:0005739,GO:0009536,GO:0009926,GO:0009941,GO:0010224	mitochondrion|plastid|auxin polar transport|chloroplast envelope|response to UV-B	--	--
CSS0034513	2	1.01679	2.01092e-09	4.41746e-08	Ethylene-responsive transcription factor 1B like	AP2/ERF-ERF	GO:0003677,GO:0003700,GO:0005634,GO:0006952,GO:0009867,GO:0009873	DNA binding|DNA-binding transcription factor activity|nucleus|defense response|jasmonic acid mediated signaling pathway|ethylene-activated signaling pathway	ko04016,ko04075	MAPK signaling pathway - plant|Plant hormone signal transduction
CSS0005561	1	0.954792	8.44163e-06	0.000123484	PREDICTED: protein YIF1B-like	--	GO:0005789,GO:0005793,GO:0006886,GO:0006888,GO:0030134,GO:0030173	endoplasmic reticulum membrane|endoplasmic reticulum-Golgi intermediate compartment|intracellular protein transport|ER to Golgi vesicle-mediated transport|COPII-coated ER to Golgi transport vesicle|integral component of Golgi membrane	--	--
CSS0011668	2	0.901935	0.000795876	0.00829106	Transcription factor bHLH3 like	bHLH	GO:0003677,GO:0003700,GO:0005634,GO:0006355,GO:0010629,GO:0046983	DNA binding|DNA-binding transcription factor activity|nucleus|regulation of transcription, DNA-templated|negative regulation of gene expression|protein dimerization activity	--	--
CSS0029619	1	1.17701	3.08834e-15	1.01919e-13	unnamed protein product	--	GO:0004497,GO:0005506,GO:0005789,GO:0016021,GO:0016705,GO:0020037	monooxygenase activity|iron ion binding|endoplasmic reticulum membrane|integral component of membrane|oxidoreductase activity, acting on paired donors, with incorporation or reduction of molecular oxygen|heme binding	ko00073	Cutin, suberine and wax biosynthesis
CSS0007572	2	2.33543	7.29583e-05	0.000924792	Histone H1.2 like	--	GO:0000786,GO:0003677,GO:0005634,GO:0006334	nucleosome|DNA binding|nucleus|nucleosome assembly	--	--
CSS0049587	2	0.920644	3.94398e-07	6.79405e-06	DNA-directed RNA polymerase III subunit like	--	GO:0003677,GO:0003899,GO:0005654,GO:0005666,GO:0006384,GO:0006386,GO:0042797	DNA binding|DNA-directed 5'-3' RNA polymerase activity|nucleoplasm|RNA polymerase III complex|transcription initiation from RNA polymerase III promoter|termination of RNA polymerase III transcription|tRNA transcription by RNA polymerase III	ko03020	RNA polymerase
CSS0019320	2	1.72357	4.40244e-23	2.12651e-21	Auxin-induced protein like	--	GO:0005634,GO:0006355,GO:0009734	nucleus|regulation of transcription, DNA-templated|auxin-activated signaling pathway	--	--
CSS0021022	1	0.93463	0.000530946	0.00576161	Sec-independent protein translocase protein like	--	--	--	--	--
CSS0000731	2	2.68997	2.08454e-15	6.93359e-14	Histone H2A variant like	--	GO:0000786,GO:0000790,GO:0003677,GO:0006325,GO:0046982	nucleosome|nuclear chromatin|DNA binding|chromatin organization|protein heterodimerization activity	--	--
CSS0048084	1	1.12184	2.01326e-13	5.99058e-12	Heat shock 22 protein	--	--	--	--	--
CSS0020208	1	0.946225	4.0024e-06	6.1242e-05	Mediator of RNA polymerase II transcription subunit 33A like	--	GO:0009698,GO:0016592,GO:2000762	phenylpropanoid metabolic process|mediator complex|regulation of phenylpropanoid metabolic process	--	--
CSS0010459	2	0.869937	1.87936e-35	1.47445e-33	Endo-1,3 like	--	GO:0005576,GO:0016787	extracellular region|hydrolase activity	--	--
CSS0020059	1	1.03196	4.29179e-17	1.57704e-15	Protein ALEX like	--	GO:0003729,GO:0006402,GO:0010228,GO:0032451,GO:0046872,GO:0051213,GO:0080167,GO:1990931	mRNA binding|mRNA catabolic process|vegetative to reproductive phase transition of meristem|demethylase activity|metal ion binding|dioxygenase activity|response to karrikin|RNA N6-methyladenosine dioxygenase activity	--	--
CSS0005237	1	0.878962	0.000129678	0.00157234	MORC family CW-type zinc finger protein	--	--	--	--	--
CSS0023169	2	0.92217	4.33296e-08	8.28312e-07	Methenyltetrahydrofolate cyclohydrolase	--	GO:0004477,GO:0004488,GO:0005737,GO:0005829,GO:0009507,GO:0009853,GO:0035999,GO:0044030,GO:0046653	methenyltetrahydrofolate cyclohydrolase activity|methylenetetrahydrofolate dehydrogenase (NADP+) activity|cytoplasm|cytosol|chloroplast|photorespiration|tetrahydrofolate interconversion|regulation of DNA methylation|tetrahydrofolate metabolic process	--	--
CSS0044391	2	0.697211	5.41057e-68	8.9924e-66	40S ribosomal protein s21e	--	GO:0000447,GO:0000461,GO:0003735,GO:0005634,GO:0005829,GO:0006412,GO:0022627	endonucleolytic cleavage in ITS1 to separate SSU-rRNA from 5.8S rRNA and LSU-rRNA from tricistronic rRNA transcript (SSU-rRNA, 5.8S rRNA, LSU-rRNA)|endonucleolytic cleavage to generate mature 3'-end of SSU-rRNA from (SSU-rRNA, 5.8S rRNA, LSU-rRNA)|structural constituent of ribosome|nucleus|cytosol|translation|cytosolic small ribosomal subunit	--	--
CSS0034518	1	1.04156	3.67711e-12	9.96706e-11	putative rapid ALkalinization Factor	--	GO:0005179,GO:0005622,GO:0007267,GO:0009505,GO:0009506,GO:0019722,GO:0048046	hormone activity|intracellular|cell-cell signaling|plant-type cell wall|plasmodesma|calcium-mediated signaling|apoplast	--	--
CSS0010827	1	1.00579	7.03404e-06	0.000104252	Thiamine pyrophosphokinase	--	GO:0004788,GO:0005524,GO:0005829,GO:0006772,GO:0009229,GO:0016301,GO:0030975	thiamine diphosphokinase activity|ATP binding|cytosol|thiamine metabolic process|thiamine diphosphate biosynthetic process|kinase activity|thiamine binding	ko00730	Thiamine metabolism
CSS0050073	2	0.951746	1.96952e-05	0.00027368	WD repeat-containing protein	--	GO:0007275,GO:0010029,GO:0040008	multicellular organism development|regulation of seed germination|regulation of growth	--	--
CSS0030745	1	1.00759	2.54419e-15	8.41817e-14	UDP-glucuronic acid decarboxylase	--	GO:0005737,GO:0005802,GO:0016021,GO:0032580,GO:0033320,GO:0042732,GO:0048040,GO:0070403	cytoplasm|trans-Golgi network|integral component of membrane|Golgi cisterna membrane|UDP-D-xylose biosynthetic process|D-xylose metabolic process|UDP-glucuronate decarboxylase activity|NAD+ binding	ko00520	Amino sugar and nucleotide sugar metabolism
CSS0020277	2	0.927503	6.45894e-11	1.59112e-09	Protein of unknown function DUF538 protein	--	--	--	--	--
CSS0039020	2	0.654428	1.13688e-47	1.22215e-45	hypothetical protein EUGRSUZ_H04551	--	GO:0003735,GO:0005773,GO:0005774,GO:0005886,GO:0006412,GO:0009507,GO:0015934,GO:0022625	structural constituent of ribosome|vacuole|vacuolar membrane|plasma membrane|translation|chloroplast|large ribosomal subunit|cytosolic large ribosomal subunit	ko03010	Ribosome
CSS0041000	2	0.625169	1.43963e-96	3.84854e-94	60S ribosomal protein L19-3	--	GO:0003729,GO:0003735,GO:0005730,GO:0005829,GO:0005886,GO:0006412,GO:0009506,GO:0016020,GO:0022625,GO:0022626,GO:0042788	mRNA binding|structural constituent of ribosome|nucleolus|cytosol|plasma membrane|translation|plasmodesma|membrane|cytosolic large ribosomal subunit|cytosolic ribosome|polysomal ribosome	ko03010	Ribosome
CSS0027615	1	0.938601	3.31498e-12	9.01935e-11	DnaJ protein like	--	GO:0005783,GO:0005788,GO:0005886,GO:0006457,GO:0051082,GO:0052033	endoplasmic reticulum|endoplasmic reticulum lumen|plasma membrane|protein folding|unfolded protein binding|pathogen-associated molecular pattern dependent induction by symbiont of host innate immune response	ko04141	Protein processing in endoplasmic reticulum
CSS0049975	2	0.996431	8.1296e-12	2.14826e-10	PREDICTED: universal stress protein A-like protein	--	GO:0005886,GO:0016208	plasma membrane|AMP binding	--	--
CSS0035506	2	1.18908	3.05125e-12	8.33322e-11	PREDICTED: calvin cycle protein CP12-1, chloroplastic	--	GO:0005507,GO:0009507,GO:0009570,GO:0009744,GO:0009941,GO:0016151,GO:0019253,GO:0032991,GO:0080153	copper ion binding|chloroplast|chloroplast stroma|response to sucrose|chloroplast envelope|nickel cation binding|reductive pentose-phosphate cycle|protein-containing complex|negative regulation of reductive pentose-phosphate cycle	--	--
CSS0009308	2	0.890193	3.65565e-06	5.62257e-05	cytochrome c oxidase subunit 5C-2	--	GO:0005746,GO:0016021	mitochondrial respiratory chain|integral component of membrane	--	--
CSS0001410	2	0.830805	9.12509e-09	1.87188e-07	ATP-dependent Clp protease proteolytic subunit 5	--	GO:0004252,GO:0009507,GO:0009532,GO:0009534,GO:0009570,GO:0009579,GO:0009840,GO:0009941	serine-type endopeptidase activity|chloroplast|plastid stroma|chloroplast thylakoid|chloroplast stroma|thylakoid|chloroplastic endopeptidase Clp complex|chloroplast envelope	--	--
CSS0011680	1	0.928117	0.000617901	0.00658222	Charged multivesicular body protein	--	--	--	ko04144	Endocytosis
CSS0006127	1	0.93881	3.75258e-44	3.74702e-42	ABC transporter B family member 21 like	--	GO:0005524,GO:0005886,GO:0009506,GO:0010329,GO:0010540,GO:0016021,GO:0042626	ATP binding|plasma membrane|plasmodesma|auxin efflux transmembrane transporter activity|basipetal auxin transport|integral component of membrane|ATPase activity, coupled to transmembrane movement of substances	ko02010	ABC transporters
CSS0042435	1	1.15356	1.14344e-301	1.65064e-298	ABC transporter B family member 21 like	--	GO:0005524,GO:0005886,GO:0009506,GO:0010329,GO:0010540,GO:0016021,GO:0042626	ATP binding|plasma membrane|plasmodesma|auxin efflux transmembrane transporter activity|basipetal auxin transport|integral component of membrane|ATPase activity, coupled to transmembrane movement of substances	ko02010	ABC transporters
CSS0012279	1	1.40592	1.92837e-24	9.81177e-23	PREDICTED: peroxidase 5	--	GO:0004601,GO:0005576,GO:0006979,GO:0020037,GO:0042744,GO:0046872	peroxidase activity|extracellular region|response to oxidative stress|heme binding|hydrogen peroxide catabolic process|metal ion binding	ko00940	Phenylpropanoid biosynthesis
CSS0022505	1	1.39847	1.91692e-20	8.2498e-19	PREDICTED: peroxidase 5	--	GO:0004601,GO:0005576,GO:0006979,GO:0020037,GO:0042744,GO:0046872	peroxidase activity|extracellular region|response to oxidative stress|heme binding|hydrogen peroxide catabolic process|metal ion binding	ko00940	Phenylpropanoid biosynthesis
CSS0044518	1	1.12126	3.23171e-12	8.80227e-11	PREDICTED: peroxidase 5	--	GO:0004601,GO:0005576,GO:0006979,GO:0020037,GO:0042744,GO:0046872	peroxidase activity|extracellular region|response to oxidative stress|heme binding|hydrogen peroxide catabolic process|metal ion binding	ko00940	Phenylpropanoid biosynthesis
CSS0014997	1	0.765966	1.01338e-08	2.06789e-07	putative A20/AN1-like zinc finger family protein 1	--	GO:0003677,GO:0004842,GO:0005634,GO:0006970,GO:0008270,GO:0009414,GO:0016567,GO:0051865	DNA binding|ubiquitin-protein transferase activity|nucleus|response to osmotic stress|zinc ion binding|response to water deprivation|protein ubiquitination|protein autoubiquitination	--	--
CSS0049180	2	0.67765	4.98192e-153	2.33066e-150	Zinc finger A20 and AN1 domain-containing stress-associated protein	--	GO:0003677,GO:0008270	DNA binding|zinc ion binding	--	--
CSS0038607	1	4.74645	2.66108e-13	7.82146e-12	--	--	--	--	--	--
CSS0047718	1	0.942144	0.00038553	0.00429903	PREDICTED: uncharacterized protein LOC108985389	--	GO:0004860,GO:0005634,GO:0007049,GO:0045786,GO:0045839	protein kinase inhibitor activity|nucleus|cell cycle|negative regulation of cell cycle|negative regulation of mitotic nuclear division	--	--
CSS0050517	2	1.02936	0.000105993	0.00130363	PREDICTED: photosystem II 5 kDa protein, chloroplastic-like	--	GO:0009523,GO:0009535,GO:0015979	photosystem II|chloroplast thylakoid membrane|photosynthesis	--	--
CSS0026711	2	0.974495	2.28114e-05	0.000313704	40S ribosomal protein S2-4-like	--	GO:0003723,GO:0003735,GO:0006412,GO:0009506,GO:0016020,GO:0022627	RNA binding|structural constituent of ribosome|translation|plasmodesma|membrane|cytosolic small ribosomal subunit	--	--
CSS0043568	2	2.22673	0.000225251	0.00261148	Ubiquitin-conjugating enzyme like	--	GO:0004842,GO:0005524,GO:0005634,GO:0008283,GO:0031145,GO:0061631	ubiquitin-protein transferase activity|ATP binding|nucleus|cell proliferation|anaphase-promoting complex-dependent catabolic process|ubiquitin conjugating enzyme activity	ko04120	Ubiquitin mediated proteolysis
CSS0010396	1	1.1008	3.63065e-06	5.58583e-05	Zinc transporter 5 like	--	GO:0005385,GO:0005886,GO:0016021,GO:0071577	zinc ion transmembrane transporter activity|plasma membrane|integral component of membrane|zinc ion transmembrane transport	--	--
CSS0014439	2	0.918402	0.000911919	0.00935527	reactive oxygen species modulator 1-like	--	--	--	--	--
CSS0046047	2	0.923775	0.000459572	0.00506321	Transcription factor like	bZIP	GO:0003700,GO:0005634,GO:0006351,GO:0006952,GO:0043565	DNA-binding transcription factor activity|nucleus|transcription, DNA-templated|defense response|sequence-specific DNA binding	ko04075	Plant hormone signal transduction
CSS0015276	1	0.930102	0.00024996	0.00287813	Protein transport protein like	--	--	--	--	--
CSS0014646	2	0.733196	1.46145e-31	9.97832e-30	E3 ubiquitin-protein ligase RHC1A	--	GO:0005618,GO:0005634,GO:0005737,GO:0006511,GO:0009651,GO:0009938,GO:0016567,GO:0046872,GO:0061630	cell wall|nucleus|cytoplasm|ubiquitin-dependent protein catabolic process|response to salt stress|negative regulation of gibberellic acid mediated signaling pathway|protein ubiquitination|metal ion binding|ubiquitin protein ligase activity	--	--
CSS0019520	2	0.921763	4.62971e-12	1.2449e-10	Elongation factor 1-beta 2 like	--	GO:0003746,GO:0005853,GO:0005886	translation elongation factor activity|eukaryotic translation elongation factor 1 complex|plasma membrane	--	--
CSS0004788	2	1.09371	1.08269e-15	3.66642e-14	cinnamyl alcohol dehydrogenase 1	--	GO:0008270,GO:0009809,GO:0045551,GO:0052747	zinc ion binding|lignin biosynthetic process|cinnamyl-alcohol dehydrogenase activity|sinapyl alcohol dehydrogenase activity	ko00940	Phenylpropanoid biosynthesis
CSS0036540	2	1.30261	4.65784e-32	3.24156e-30	cinnamyl alcohol dehydrogenase 1	--	GO:0008270,GO:0009809,GO:0045551,GO:0052747	zinc ion binding|lignin biosynthetic process|cinnamyl-alcohol dehydrogenase activity|sinapyl alcohol dehydrogenase activity	ko00940	Phenylpropanoid biosynthesis
CSS0042044	1	0.949459	0.000357071	0.00401179	DNA repair protein	--	GO:0003684,GO:0003887,GO:0005634,GO:0006974,GO:0010224,GO:0042276,GO:0046872	damaged DNA binding|DNA-directed DNA polymerase activity|nucleus|cellular response to DNA damage stimulus|response to UV-B|error-prone translesion synthesis|metal ion binding	--	--
CSS0015264	2	0.90866	2.07481e-13	6.16284e-12	TIP41-like protein isoform 2	--	GO:0005829,GO:0007165,GO:0031929	cytosol|signal transduction|TOR signaling	--	--
CSS0031892	2	0.899748	6.91547e-29	4.21986e-27	Hyphal wall protein	--	--	--	--	--
CSS0028311	1	1.34476	1.36036e-15	4.57909e-14	PREDICTED: 3-oxo-Delta(4,5)-steroid 5-beta-reductase-like	--	GO:0000166,GO:0047787,GO:0050662	nucleotide binding|delta4-3-oxosteroid 5beta-reductase activity|coenzyme binding	--	--
CSS0015859	1	0.828318	1.21418e-09	2.71564e-08	LOW QUALITY PROTEIN: vacuolar-sorting receptor 3-like	--	GO:0000139,GO:0005509,GO:0015031,GO:0016021,GO:0030665,GO:0031902	Golgi membrane|calcium ion binding|protein transport|integral component of membrane|clathrin-coated vesicle membrane|late endosome membrane	--	--
CSS0002359	2	1.53413	9.09088e-92	2.28516e-89	LIM domain-containing protein	LIM	GO:0003729,GO:0005737,GO:0005856,GO:0005886,GO:0046872,GO:0051015,GO:0051017	mRNA binding|cytoplasm|cytoskeleton|plasma membrane|metal ion binding|actin filament binding|actin filament bundle assembly	--	--
CSS0019369	2	0.84326	7.4417e-14	2.25821e-12	Serine carboxypeptidase-like	--	GO:0004185,GO:0005576,GO:0019748	serine-type carboxypeptidase activity|extracellular region|secondary metabolic process	--	--
CSS0039448	1	1.04041	0.000190853	0.00224409	PREDICTED: phytosulfokines	--	GO:0005576,GO:0007275,GO:0008083,GO:0008283,GO:0030154	extracellular region|multicellular organism development|growth factor activity|cell proliferation|cell differentiation	--	--
CSS0049994	2	0.870297	2.34778e-12	6.47853e-11	LL-diaminopimelate aminotransferase	--	GO:0005507,GO:0008483,GO:0009089,GO:0009507,GO:0009570,GO:0009735,GO:0009862,GO:0010285,GO:0030170	copper ion binding|transaminase activity|lysine biosynthetic process via diaminopimelate|chloroplast|chloroplast stroma|response to cytokinin|systemic acquired resistance, salicylic acid mediated signaling pathway|L,L-diaminopimelate aminotransferase activity|pyridoxal phosphate binding	--	--
CSS0005808	1	1.01523	3.96323e-70	6.95286e-68	Squalene monooxygenase	--	GO:0004506,GO:0016021,GO:0050660	squalene monooxygenase activity|integral component of membrane|flavin adenine dinucleotide binding	ko00100,ko00909	Steroid biosynthesis|Sesquiterpenoid and triterpenoid biosynthesis
CSS0000362	1	1.10612	2.80838e-51	3.28457e-49	A-agglutinin anchorage subunit like	--	--	--	--	--
CSS0015224	1	2.49709	4.61938e-196	3.15398e-193	Transcription factor bHLH25 like	bHLH	GO:0003677,GO:0003700,GO:0005634,GO:0006355,GO:0046983	DNA binding|DNA-binding transcription factor activity|nucleus|regulation of transcription, DNA-templated|protein dimerization activity	--	--
CSS0015485	1	0.778311	5.01113e-28	2.94746e-26	NADH-ubiquinone oxidoreductase subunit 4 (mitochondrion)	--	GO:0008137,GO:0016021,GO:0031966,GO:0042773,GO:0070469	NADH dehydrogenase (ubiquinone) activity|integral component of membrane|mitochondrial membrane|ATP synthesis coupled electron transport|respiratory chain	ko00190	Oxidative phosphorylation
CSS0011274	2	0.969146	7.14334e-05	0.000907283	costars family protein	--	--	--	--	--
CSS0028940	2	0.876371	0.000508647	0.00554304	TRNA pseudouridine synthase	--	--	--	--	--
CSS0037292	1	1.50108	5.92174e-07	1.00233e-05	LMBR1 domain-containing protein 2 A like	--	--	--	--	--
CSS0027025	2	0.65363	7.38987e-98	1.99665e-95	14-3-3 protein	--	GO:0019904	protein domain specific binding	--	--
CSS0025423	2	0.606711	4.32762e-06	6.57999e-05	Protein like	--	GO:0004722,GO:0005886,GO:0046872	protein serine/threonine phosphatase activity|plasma membrane|metal ion binding	--	--
CSS0024435	2	0.809895	3.1735e-07	5.51759e-06	Splicing factor-like protein	--	GO:0000381,GO:0000398,GO:0003723,GO:0003729,GO:0005681,GO:0005737,GO:0005829,GO:0008380,GO:0016020,GO:0016607,GO:0045292	regulation of alternative mRNA splicing, via spliceosome|mRNA splicing, via spliceosome|RNA binding|mRNA binding|spliceosomal complex|cytoplasm|cytosol|RNA splicing|membrane|nuclear speck|mRNA cis splicing, via spliceosome	ko03040	Spliceosome
CSS0044873	2	0.918818	6.23884e-07	1.05213e-05	hypothetical protein CDL12_20487	--	--	--	--	--
CSS0037720	2	0.907272	4.18824e-08	8.03078e-07	hypothetical protein CEY00_Acc07503	--	--	--	--	--
CSS0002039	2	0.911819	2.24846e-05	0.000309631	Protein FAM126B like	--	--	--	--	--
CSS0040629	2	0.832212	5.05477e-12	1.35558e-10	serine decarboxylase	--	GO:0016831,GO:0019752,GO:0030170	carboxy-lyase activity|carboxylic acid metabolic process|pyridoxal phosphate binding	ko00340	Histidine metabolism
CSS0018842	1	0.986986	8.88067e-09	1.82397e-07	Retrotransposon-derived protein	--	--	--	--	--
CSS0040164	2	0.97205	0.000182307	0.0021476	RHOMBOID-like protein	--	GO:0004252,GO:0016021,GO:0031969	serine-type endopeptidase activity|integral component of membrane|chloroplast membrane	--	--
CSS0005433	1	0.931483	0.000203227	0.00237852	Transmembrane emp24 domain-containing protein	--	GO:0005783,GO:0005789,GO:0005793,GO:0005794,GO:0006886,GO:0006888,GO:0007030,GO:0016021,GO:0030134	endoplasmic reticulum|endoplasmic reticulum membrane|endoplasmic reticulum-Golgi intermediate compartment|Golgi apparatus|intracellular protein transport|ER to Golgi vesicle-mediated transport|Golgi organization|integral component of membrane|COPII-coated ER to Golgi transport vesicle	--	--
CSS0017949	2	0.963818	7.9928e-12	2.11322e-10	RNA demethylase	--	GO:0000932,GO:0003729,GO:0006402,GO:0009506,GO:0016032,GO:0032451,GO:0046872,GO:0051213,GO:0070988	P-body|mRNA binding|mRNA catabolic process|plasmodesma|viral process|demethylase activity|metal ion binding|dioxygenase activity|demethylation	--	--
CSS0011212	1	0.997492	0.000137083	0.00165538	Sad1/UNC-like, C-terminal protein	--	GO:0005635,GO:0005783,GO:0005789,GO:0006997,GO:0016021,GO:0031965,GO:0043621	nuclear envelope|endoplasmic reticulum|endoplasmic reticulum membrane|nucleus organization|integral component of membrane|nuclear membrane|protein self-association	--	--
CSS0025181	2	0.868841	1.52268e-06	2.45595e-05	hypothetical protein CEY00_Acc11420	--	--	--	--	--
CSS0019049	1	0.95072	0.000302046	0.00342941	PREDICTED: probable protein phosphatase 2C 74	--	GO:0004722,GO:0016021,GO:0046872	protein serine/threonine phosphatase activity|integral component of membrane|metal ion binding	--	--
CSS0026347	2	0.818001	3.1262e-05	0.000419302	Immune-associated nucleotide-binding protein	--	GO:0005525	GTP binding	--	--
CSS0046771	1	0.917744	6.92373e-09	1.44197e-07	Autophagy-related protein	--	GO:0000045,GO:0000422,GO:0001934,GO:0005776,GO:0006914,GO:0009506,GO:0010150,GO:0015031,GO:0019898,GO:0019901,GO:0030242,GO:0031410,GO:0032947,GO:0034045,GO:0034727,GO:0042803,GO:0061709,GO:0061723,GO:1990316	autophagosome assembly|autophagy of mitochondrion|positive regulation of protein phosphorylation|autophagosome|autophagy|plasmodesma|leaf senescence|protein transport|extrinsic component of membrane|protein kinase binding|autophagy of peroxisome|cytoplasmic vesicle|protein-containing complex scaffold activity|phagophore assembly site membrane|piecemeal microautophagy of the nucleus|protein homodi…	ko04136	Autophagy - other
CSS0019412	2	1.07301	1.95585e-13	5.82662e-12	PREDICTED: tetraspanin-8	--	GO:0005794,GO:0005886,GO:0009506,GO:0016020,GO:0016021,GO:0050829	Golgi apparatus|plasma membrane|plasmodesma|membrane|integral component of membrane|defense response to Gram-negative bacterium	--	--
CSS0010628	1	0.96732	4.83254e-06	7.31468e-05	Diacylglycerol kinase	--	GO:0003951,GO:0004143,GO:0005524,GO:0005886,GO:0006952,GO:0007205,GO:0048364,GO:0048366	NAD+ kinase activity|diacylglycerol kinase activity|ATP binding|plasma membrane|defense response|protein kinase C-activating G protein-coupled receptor signaling pathway|root development|leaf development	ko00561,ko00564,ko04070	Glycerolipid metabolism|Glycerophospholipid metabolism|Phosphatidylinositol signaling system
CSS0015847	1	1.4474	1.46792e-45	1.5136e-43	hypothetical protein CEY00_Acc00739	--	--	--	--	--
CSS0039143	2	0.860453	9.68e-13	2.74765e-11	D-3-phosphoglycerate dehydrogenase	--	GO:0005739,GO:0008863,GO:0016616,GO:0042183,GO:0051287	mitochondrion|formate dehydrogenase (NAD+) activity|oxidoreductase activity, acting on the CH-OH group of donors, NAD or NADP as acceptor|formate catabolic process|NAD binding	--	--
CSS0041466	1	1.31834	4.53363e-15	1.48838e-13	HSP-interacting protein	--	GO:0030659	cytoplasmic vesicle membrane	--	--
CSS0023523	2	0.817179	2.68299e-22	1.25633e-20	Large proline-rich protein like isoform 1	--	GO:0005634,GO:0009877	nucleus|nodulation	--	--
CSS0031647	1	0.854436	2.75699e-08	5.4012e-07	Sister chromatid cohesion protein	--	GO:0000785,GO:0000794,GO:0005198,GO:0005634,GO:0005829,GO:0006281,GO:0006302,GO:0007064,GO:0007076,GO:0007129,GO:0051301,GO:0051321	chromatin|condensed nuclear chromosome|structural molecule activity|nucleus|cytosol|DNA repair|double-strand break repair|mitotic sister chromatid cohesion|mitotic chromosome condensation|synapsis|cell division|meiotic cell cycle	--	--
CSS0033090	2	0.939684	2.18107e-41	2.0445e-39	hypothetical protein COLO4_18942	--	GO:0004674,GO:0005524,GO:0007165,GO:0050832	protein serine/threonine kinase activity|ATP binding|signal transduction|defense response to fungus	--	--
CSS0048543	2	0.742663	3.55541e-42	3.39579e-40	eukaryotic translation initiation factor 5a-2-like protein	--	GO:0003743,GO:0003746,GO:0006452,GO:0043022,GO:0045901,GO:0045905	translation initiation factor activity|translation elongation factor activity|translational frameshifting|ribosome binding|positive regulation of translational elongation|positive regulation of translational termination	--	--
CSS0032495	2	0.881874	0.000169618	0.00201267	Nucleoid-associated protein	--	GO:0003677,GO:0009507,GO:0009535,GO:0009570,GO:0009941,GO:0045037	DNA binding|chloroplast|chloroplast thylakoid membrane|chloroplast stroma|chloroplast envelope|protein import into chloroplast stroma	--	--
CSS0004043	2	0.781586	4.10255e-20	1.74773e-18	enhancer of rudimentary homolog	--	GO:0006221,GO:0007049,GO:0045747	pyrimidine nucleotide biosynthetic process|cell cycle|positive regulation of Notch signaling pathway	--	--
CSS0004911	1	0.987664	4.7495e-07	8.10705e-06	--	--	--	--	--	--
CSS0018089	2	1.00166	0.000178632	0.00210972	zinc finger protein CONSTANS-LIKE 4	C2C2-CO-like	GO:0005634,GO:0008270	nucleus|zinc ion binding	--	--
CSS0012026	2	0.969712	0.000290954	0.0033177	hypothetical protein Ccrd_004732	--	GO:0005840	ribosome	ko03010	Ribosome
CSS0043382	1	0.925822	0.000285925	0.00326692	Centromere-associated protein like	--	--	--	--	--
CSS0022194	2	0.932155	2.79116e-08	5.4639e-07	peptidyl-tRNA hydrolase, PTH2, Peptidyl-tRNA hydrolase II domain protein	--	--	--	--	--
CSS0015542	2	1.50019	1.1409e-06	1.86912e-05	uncharacterized protein LOC100813676 isoform X2	--	--	--	--	--
CSS0032436	2	1.03209	1.45295e-11	3.76655e-10	bZIP transcription factor family protein 4	bZIP	GO:0003677,GO:0003700,GO:0005634,GO:0042803,GO:0046982,GO:0071333	DNA binding|DNA-binding transcription factor activity|nucleus|protein homodimerization activity|protein heterodimerization activity|cellular response to glucose stimulus	--	--
CSS0000176	2	0.784185	1.09632e-10	2.65666e-09	N-terminal nucleophile aminohydrolases (Ntn hydrolases) superfamily protein isoform 1	--	GO:0004175,GO:0004298,GO:0005634,GO:0005737,GO:0005839,GO:0010498,GO:0010499,GO:0019774,GO:0043161	endopeptidase activity|threonine-type endopeptidase activity|nucleus|cytoplasm|proteasome core complex|proteasomal protein catabolic process|proteasomal ubiquitin-independent protein catabolic process|proteasome core complex, beta-subunit complex|proteasome-mediated ubiquitin-dependent protein catabolic process	--	--
CSS0026975	2	1.75799	0	0	heat shock protein 18.1	--	GO:0000302,GO:0005737,GO:0006457,GO:0009408,GO:0009651,GO:0042542,GO:0043621,GO:0051082,GO:0051259	response to reactive oxygen species|cytoplasm|protein folding|response to heat|response to salt stress|response to hydrogen peroxide|protein self-association|unfolded protein binding|protein complex oligomerization	ko04141	Protein processing in endoplasmic reticulum
CSS0021371	2	1.05278	4.58882e-05	0.000601583	PREDICTED: solute carrier family 25 member 44-like	--	GO:0005743,GO:0015187,GO:0016021,GO:1904983	mitochondrial inner membrane|glycine transmembrane transporter activity|integral component of membrane|glycine import into mitochondrion	--	--
CSS0000726	2	2.58458	9.09258e-07	1.50624e-05	Thermospermine synthase	--	GO:0005737,GO:0006596,GO:0009926,GO:0010087,GO:0010487,GO:0016768,GO:0048759	cytoplasm|polyamine biosynthetic process|auxin polar transport|phloem or xylem histogenesis|thermospermine synthase activity|spermine synthase activity|xylem vessel member cell differentiation	--	--
CSS0013785	2	1.53868	5.23122e-41	4.81434e-39	Copper transporter 5.1 like	--	GO:0005375,GO:0016021	copper ion transmembrane transporter activity|integral component of membrane	--	--
CSS0023665	1	1.01613	0.000485369	0.00531727	Cytochrome P450 CYP72A219 like	--	GO:0004497,GO:0005506,GO:0016021,GO:0016705,GO:0020037	monooxygenase activity|iron ion binding|integral component of membrane|oxidoreductase activity, acting on paired donors, with incorporation or reduction of molecular oxygen|heme binding	--	--
CSS0004113	2	0.93529	1.1424e-05	0.000164116	NAD(P)H-quinone oxidoreductase subunit U like	--	GO:0009507,GO:0009535,GO:0010598,GO:0016021,GO:0016491,GO:0048038	chloroplast|chloroplast thylakoid membrane|NAD(P)H dehydrogenase complex (plastoquinone)|integral component of membrane|oxidoreductase activity|quinone binding	--	--
CSS0011246	1	1.0626	7.3069e-10	1.66523e-08	hypothetical protein CEY00_Acc09682	--	GO:0005634,GO:0005829,GO:0046872,GO:0051539,GO:0070482	nucleus|cytosol|metal ion binding|4 iron, 4 sulfur cluster binding|response to oxygen levels	--	--
CSS0028361	2	0.965328	0.000909416	0.00933717	SH3 domain-containing protein	--	GO:0005783,GO:0005794,GO:0005886,GO:0030136	endoplasmic reticulum|Golgi apparatus|plasma membrane|clathrin-coated vesicle	--	--
CSS0044062	2	0.693154	6.6027e-20	2.78233e-18	PREDICTED: endoplasmic reticulum-Golgi intermediate compartment protein 3	--	GO:0000139,GO:0005783,GO:0005789,GO:0006886,GO:0006888,GO:0006890,GO:0030134,GO:0030173,GO:0030176	Golgi membrane|endoplasmic reticulum|endoplasmic reticulum membrane|intracellular protein transport|ER to Golgi vesicle-mediated transport|retrograde vesicle-mediated transport, Golgi to ER|COPII-coated ER to Golgi transport vesicle|integral component of Golgi membrane|integral component of endoplasmic reticulum membrane	--	--
CSS0040005	2	0.89681	4.39912e-07	7.52932e-06	DNA/RNA-binding protein Alba-like protein	--	GO:0003676,GO:0005829	nucleic acid binding|cytosol	--	--
CSS0003314	2	3.25454	4.10582e-09	8.75055e-08	Ran BP2/NZF zinc finger-like superfamily protein isoform 1	--	GO:0003723,GO:0005730,GO:0046872	RNA binding|nucleolus|metal ion binding	--	--
CSS0041564	2	0.694748	6.02974e-35	4.6583e-33	hypothetical protein GLYMA_04G069200	--	GO:0003924,GO:0005525,GO:0005634,GO:0006913,GO:0015031	GTPase activity|GTP binding|nucleus|nucleocytoplasmic transport|protein transport	ko03008,ko03013	Ribosome biogenesis in eukaryotes|RNA transport
CSS0039202	2	0.580311	1.56612e-55	2.03414e-53	ubiquinol-cytochrome C reductase complex	--	GO:0005750,GO:0005774,GO:0006122,GO:0009536	mitochondrial respiratory chain complex III|vacuolar membrane|mitochondrial electron transport, ubiquinol to cytochrome c|plastid	ko00190	Oxidative phosphorylation
CSS0031636	2	0.919374	7.5165e-09	1.56092e-07	V-type proton ATPase subunit c''1 like	--	GO:0000139,GO:0005789,GO:0015991,GO:0016021,GO:0033179,GO:0046961	Golgi membrane|endoplasmic reticulum membrane|ATP hydrolysis coupled proton transport|integral component of membrane|proton-transporting V-type ATPase, V0 domain|proton-transporting ATPase activity, rotational mechanism	ko00190,ko04145	Oxidative phosphorylation|Phagosome
CSS0004623	1	1.55292	7.4826e-05	0.000946803	Pleiotropic drug resistance protein	--	GO:0005524,GO:0016021,GO:0016887	ATP binding|integral component of membrane|ATPase activity	--	--
CSS0015478	1	1.07068	4.33865e-11	1.08413e-09	hypothetical protein L484_007380	--	GO:0000139,GO:0000149,GO:0005484,GO:0006886,GO:0006888,GO:0006906,GO:0012505,GO:0016021,GO:0031201,GO:0048278	Golgi membrane|SNARE binding|SNAP receptor activity|intracellular protein transport|ER to Golgi vesicle-mediated transport|vesicle fusion|endomembrane system|integral component of membrane|SNARE complex|vesicle docking	ko04130	SNARE interactions in vesicular transport
CSS0006872	1	0.93463	0.000122778	0.00149515	Helicase and polymerase-containing protein	--	GO:0003677,GO:0003887,GO:0004386,GO:0005524,GO:0005737,GO:0006261,GO:0007049,GO:0008409,GO:0009640,GO:0009933,GO:0010468,GO:0051301,GO:1902749,GO:1990067,GO:2000011	DNA binding|DNA-directed DNA polymerase activity|helicase activity|ATP binding|cytoplasm|DNA-dependent DNA replication|cell cycle|5'-3' exonuclease activity|photomorphogenesis|meristem structural organization|regulation of gene expression|cell division|regulation of cell cycle G2/M phase transition|intrachromosomal DNA recombination|regulation of adaxial/abaxial pattern formation	--	--
CSS0033435	1	0.922436	1.21287e-14	3.88096e-13	NADH-ubiquinone oxidoreductase	--	GO:0016021	integral component of membrane	--	--
CSS0019452	2	0.55584	3.16486e-73	5.94441e-71	Aspartate aminotransferase	--	GO:0004069,GO:0005777,GO:0006103,GO:0006531,GO:0006536,GO:0009058,GO:0009507,GO:0009536,GO:0010150,GO:0016020,GO:0030170	L-aspartate:2-oxoglutarate aminotransferase activity|peroxisome|2-oxoglutarate metabolic process|aspartate metabolic process|glutamate metabolic process|biosynthetic process|chloroplast|plastid|leaf senescence|membrane|pyridoxal phosphate binding	--	--
CSS0000941	1	1.21096	7.9113e-06	0.000116163	PREDICTED: myosin heavy chain kinase B	--	GO:0005634,GO:0005737,GO:0009846	nucleus|cytoplasm|pollen germination	--	--
CSS0034497	1	0.924165	3.60869e-09	7.72253e-08	PREDICTED: uncharacterized protein LOC100254240	--	GO:0003846,GO:0004622,GO:0005783,GO:0005794,GO:0005886,GO:0006979,GO:0009506,GO:0009809,GO:0010043,GO:0016020,GO:0016787,GO:0042542,GO:0046686,GO:0090430	2-acylglycerol O-acyltransferase activity|lysophospholipase activity|endoplasmic reticulum|Golgi apparatus|plasma membrane|response to oxidative stress|plasmodesma|lignin biosynthetic process|response to zinc ion|membrane|hydrolase activity|response to hydrogen peroxide|response to cadmium ion|caffeoyl-CoA: alcohol caffeoyl transferase activity	--	--
CSS0023026	2	0.926319	1.44103e-05	0.000204278	Protein SAWADEE HOMEODOMAIN like	--	GO:0003682,GO:0005634,GO:0006306,GO:0006346,GO:0031047,GO:0046872	chromatin binding|nucleus|DNA methylation|methylation-dependent chromatin silencing|gene silencing by RNA|metal ion binding	--	--
CSS0018670	2	0.961951	3.25757e-05	0.000436112	cyclin dependent kinase A	--	GO:0004693,GO:0005524,GO:0007049,GO:0008353,GO:0051301	cyclin-dependent protein serine/threonine kinase activity|ATP binding|cell cycle|RNA polymerase II CTD heptapeptide repeat kinase activity|cell division	--	--
CSS0049272	2	0.679839	2.61517e-06	4.09836e-05	Vacuolar-processing enzyme like	--	GO:0008234	cysteine-type peptidase activity	--	--
CSS0008615	2	0.996555	5.23515e-09	1.10857e-07	BRISC and BRCA1-A complex member like	--	--	--	ko03440	Homologous recombination
CSS0024744	2	0.918027	0.000504665	0.00550556	PITH domain-containing protein	--	GO:0005634,GO:0005737,GO:0005829	nucleus|cytoplasm|cytosol	--	--
CSS0001901	2	3.54986	1.09859e-82	2.39251e-80	hypothetical protein CEY00_Acc28649	--	--	--	--	--
CSS0039252	2	0.869042	7.67783e-11	1.88312e-09	PREDICTED: translation machinery-associated protein 22	--	GO:0001731,GO:0002183,GO:0002188,GO:0003729,GO:0003743,GO:0022626	formation of translation preinitiation complex|cytoplasmic translational initiation|translation reinitiation|mRNA binding|translation initiation factor activity|cytosolic ribosome	--	--
CSS0012680	2	1.02477	3.20417e-06	4.96141e-05	hypothetical protein CEY00_Acc29088	--	--	--	--	--
CSS0022108	2	1.00595	3.29944e-09	7.08776e-08	Cytochrome P450 711A1 like	--	GO:0004497,GO:0005506,GO:0009926,GO:0009934,GO:0009963,GO:0010223,GO:0016021,GO:0016117,GO:0016705,GO:0020037	monooxygenase activity|iron ion binding|auxin polar transport|regulation of meristem structural organization|positive regulation of flavonoid biosynthetic process|secondary shoot formation|integral component of membrane|carotenoid biosynthetic process|oxidoreductase activity, acting on paired donors, with incorporation or reduction of molecular oxygen|heme binding	--	--
CSS0008848	1	1.01443	1.59533e-05	0.000224274	Mitochondrial substrate carrier family protein like	--	GO:0005739,GO:0005743,GO:0015228,GO:0016021,GO:1990559	mitochondrion|mitochondrial inner membrane|coenzyme A transmembrane transporter activity|integral component of membrane|mitochondrial coenzyme A transmembrane transport	--	--
CSS0050299	2	1.01074	5.29161e-73	9.82937e-71	Cytokinin riboside 5'-monophosphate phosphoribohydrolase	--	GO:0005634,GO:0005829,GO:0009691,GO:0016799,GO:0042803	nucleus|cytosol|cytokinin biosynthetic process|hydrolase activity, hydrolyzing N-glycosyl compounds|protein homodimerization activity	--	--
CSS0007218	1	1.08137	8.62023e-34	6.37683e-32	Pectin acetylesterase	--	GO:0005576,GO:0009505,GO:0052793,GO:0071555	extracellular region|plant-type cell wall|pectin acetylesterase activity|cell wall organization	--	--
CSS0046759	2	0.878205	6.93007e-18	2.65259e-16	Profilin	--	--	--	--	--
CSS0021058	2	1.02485	5.27764e-16	1.82764e-14	WAT1-related protein	--	GO:0005794,GO:0005886,GO:0016021,GO:0022857	Golgi apparatus|plasma membrane|integral component of membrane|transmembrane transporter activity	--	--
CSS0001070	1	0.990788	0.000404618	0.00449798	Transmembrane protein like	--	--	--	--	--
CSS0005047	1	0.837684	4.18823e-19	1.6848e-17	Inactive poly	--	GO:0000303,GO:0003950,GO:0005634,GO:0005737,GO:0006809,GO:0006970,GO:0009414,GO:0009651,GO:0009723,GO:0009793,GO:0009816,GO:0009867,GO:0009873,GO:0010102,GO:0010193,GO:0012501,GO:0016032,GO:0016363,GO:2000377	response to superoxide|NAD+ ADP-ribosyltransferase activity|nucleus|cytoplasm|nitric oxide biosynthetic process|response to osmotic stress|response to water deprivation|response to salt stress|response to ethylene|embryo development ending in seed dormancy|defense response to bacterium, incompatible interaction|jasmonic acid mediated signaling pathway|ethylene-activated signaling pathway|lateral …	--	--
CSS0018378	2	0.949486	0.000101659	0.00125429	Protein TORNADO like	--	GO:0005886,GO:0009506,GO:0009554,GO:0009734,GO:0009933,GO:0009934,GO:0009956,GO:0010015,GO:0010305,GO:0016021	plasma membrane|plasmodesma|megasporogenesis|auxin-activated signaling pathway|meristem structural organization|regulation of meristem structural organization|radial pattern formation|root morphogenesis|leaf vascular tissue pattern formation|integral component of membrane	--	--
CSS0037473	2	0.830187	4.76785e-16	1.65792e-14	unnamed protein product, partial	PLATZ	--	--	--	--
CSS0046578	1	2.32566	1.88521e-18	7.41824e-17	--	--	--	--	--	--
CSS0014279	1	0.97889	0.00019271	0.00226381	PREDICTED: protein HAIKU1-like	--	GO:0009960,GO:0043078,GO:0080113	endosperm development|polar nucleus|regulation of seed growth	--	--
CSS0046330	2	0.970087	0.000780963	0.0081542	Stabilin-1 like	--	--	--	--	--
CSS0012644	1	1.89337	1.43345e-58	2.03442e-56	Expansin-like	--	--	--	--	--
CSS0037714	2	1.11531	0.000641398	0.00680955	Two-component response regulator-like	GARP-ARR-B	GO:0000160,GO:0003700,GO:0005634,GO:0044212,GO:0045893	phosphorelay signal transduction system|DNA-binding transcription factor activity|nucleus|transcription regulatory region DNA binding|positive regulation of transcription, DNA-templated	--	--
CSS0020038	2	1.17453	6.88918e-161	3.51592e-158	uncharacterized protein LOC110641943	--	GO:0009744,GO:0009749,GO:0019900,GO:0042594,GO:0046872,GO:1905582	response to sucrose|response to glucose|kinase binding|response to starvation|metal ion binding|response to mannose	--	--
CSS0007413	2	0.914861	2.99748e-08	5.83388e-07	uncharacterized protein LOC110641943	--	GO:0009744,GO:0009749,GO:0019900,GO:0042594,GO:0046872,GO:1905582	response to sucrose|response to glucose|kinase binding|response to starvation|metal ion binding|response to mannose	--	--
CSS0034154	2	0.910821	0.000539454	0.00583763	Poly(U)-specific endoribonuclease-B like	--	--	--	--	--
CSS0021642	2	1.179	9.21574e-05	0.00114686	chloroplast beta-amylase 3	--	GO:0000024,GO:0005983,GO:0009409,GO:0009570,GO:0016161,GO:0102229	maltose biosynthetic process|starch catabolic process|response to cold|chloroplast stroma|beta-amylase activity|amylopectin maltohydrolase activity	--	--
CSS0049692	2	0.900853	2.93495e-11	7.42555e-10	uncharacterized protein LOC105636623	--	--	--	--	--
CSS0004207	1	1.10115	9.17635e-26	4.98532e-24	Receptor-like protein kinase, partial	--	--	--	--	--
CSS0032979	2	0.5515	2.47057e-112	8.2666e-110	putative ribosomal protein L37ae	--	GO:0003735,GO:0005840,GO:0006412,GO:0046872	structural constituent of ribosome|ribosome|translation|metal ion binding	--	--
CSS0012444	1	1.01437	2.56113e-06	4.02116e-05	Receptor protein kinase	--	GO:0004674,GO:0005524,GO:0005886,GO:0006468,GO:0016021,GO:0048544	protein serine/threonine kinase activity|ATP binding|plasma membrane|protein phosphorylation|integral component of membrane|recognition of pollen	--	--
CSS0022595	2	0.897882	6.5366e-05	0.000836106	Enoyl-CoA hydratase	--	GO:0004300,GO:0004490,GO:0005739,GO:0006635,GO:0008233,GO:0009083	enoyl-CoA hydratase activity|methylglutaconyl-CoA hydratase activity|mitochondrion|fatty acid beta-oxidation|peptidase activity|branched-chain amino acid catabolic process	ko00280	Valine, leucine and isoleucine degradation
CSS0020819	2	0.969797	5.58683e-13	1.61392e-11	Ubiquitin carboxyl-terminal hydrolase	--	GO:0004843,GO:0005737,GO:0005829,GO:0006511,GO:0016579	thiol-dependent ubiquitin-specific protease activity|cytoplasm|cytosol|ubiquitin-dependent protein catabolic process|protein deubiquitination	--	--
CSS0004447	1	1.3773	2.69117e-06	4.20834e-05	PREDICTED: WD repeat-containing protein 44	--	--	--	--	--
CSS0020750	1	0.914832	3.78648e-28	2.24281e-26	Glucuronosyltransferase	--	GO:0006486,GO:0016021,GO:0016757,GO:0046872	protein glycosylation|integral component of membrane|transferase activity, transferring glycosyl groups|metal ion binding	--	--
CSS0040248	2	1.02527	0.000125458	0.00152411	Aspartyl protease	--	GO:0004190,GO:0006508,GO:0009505,GO:0030163	aspartic-type endopeptidase activity|proteolysis|plant-type cell wall|protein catabolic process	--	--
CSS0016514	2	1.29489	1.72228e-25	9.22779e-24	HSP22.4	--	GO:0005739,GO:0046686	mitochondrion|response to cadmium ion	ko04141	Protein processing in endoplasmic reticulum
CSS0026368	2	0.766809	4.22453e-50	4.85101e-48	NADH dehydrogenase	--	GO:0005747,GO:0016021,GO:0055114	mitochondrial respiratory chain complex I|integral component of membrane|oxidation-reduction process	--	--
CSS0010154	2	0.812491	4.11051e-14	1.26868e-12	PREDICTED: FAM10 family protein At4g22670-like isoform X1	--	GO:0005623,GO:0006457,GO:0010286,GO:0016671,GO:0030544,GO:0042802,GO:0045454,GO:0046983,GO:0051085,GO:0051259	cell|protein folding|heat acclimation|oxidoreductase activity, acting on a sulfur group of donors, disulfide as acceptor|Hsp70 protein binding|identical protein binding|cell redox homeostasis|protein dimerization activity|chaperone cofactor-dependent protein refolding|protein complex oligomerization	--	--
CSS0022826	2	1.62789	3.32594e-48	3.64519e-46	Pectinesterase inhibitor domain protein	--	GO:0004857,GO:0043086,GO:0046910,GO:0048046	enzyme inhibitor activity|negative regulation of catalytic activity|pectinesterase inhibitor activity|apoplast	--	--
CSS0008065	1	0.951132	6.29164e-09	1.31684e-07	Primary amine oxidase	--	GO:0005507,GO:0006809,GO:0008131,GO:0009308,GO:0009738,GO:0048038,GO:0052593,GO:0052594,GO:0052595,GO:0052596	copper ion binding|nitric oxide biosynthetic process|primary amine oxidase activity|amine metabolic process|abscisic acid-activated signaling pathway|quinone binding|tryptamine:oxygen oxidoreductase (deaminating) activity|aminoacetone:oxygen oxidoreductase(deaminating) activity|aliphatic-amine oxidase activity|phenethylamine:oxygen oxidoreductase (deaminating) activity	ko00260,ko00350,ko00360,ko00410,ko00950,ko00960	Glycine, serine and threonine metabolism|Tyrosine metabolism|Phenylalanine metabolism|beta-Alanine metabolism|Isoquinoline alkaloid biosynthesis|Tropane, piperidine and pyridine alkaloid biosynthesis
CSS0033087	2	0.854751	1.15335e-05	0.000165642	Peptidyl-tRNA hydrolase	--	GO:0003747,GO:0004045,GO:0005739,GO:0005743,GO:0005762,GO:0051321,GO:0070126	translation release factor activity|aminoacyl-tRNA hydrolase activity|mitochondrion|mitochondrial inner membrane|mitochondrial large ribosomal subunit|meiotic cell cycle|mitochondrial translational termination	--	--
CSS0002830	1	0.845979	2.21302e-37	1.84205e-35	SNARE-interacting protein like	--	GO:0005773,GO:0005829,GO:0005856,GO:0005886,GO:0006904,GO:0007049,GO:0009524,GO:0015031,GO:0019898,GO:0051301	vacuole|cytosol|cytoskeleton|plasma membrane|vesicle docking involved in exocytosis|cell cycle|phragmoplast|protein transport|extrinsic component of membrane|cell division	--	--
CSS0044732	2	0.940592	4.5074e-06	6.84099e-05	Zinc finger CCCH domain-containing protein	--	GO:0003677,GO:0003723,GO:0046872	DNA binding|RNA binding|metal ion binding	--	--
CSS0012959	1	0.960506	5.76905e-10	1.33157e-08	Phospholipase D beta like	--	GO:0004630,GO:0005546,GO:0005737,GO:0009506,GO:0009816,GO:0016020,GO:0016042,GO:0046686,GO:0070290	phospholipase D activity|phosphatidylinositol-4,5-bisphosphate binding|cytoplasm|plasmodesma|defense response to bacterium, incompatible interaction|membrane|lipid catabolic process|response to cadmium ion|N-acylphosphatidylethanolamine-specific phospholipase D activity	ko00564,ko00565,ko04144	Glycerophospholipid metabolism|Ether lipid metabolism|Endocytosis
CSS0048870	1	1.00628	0.000583802	0.00626654	Calcium-dependent protein kinase	--	GO:0004683,GO:0005509,GO:0005524,GO:0005634,GO:0005737,GO:0009738,GO:0009931,GO:0016020,GO:0018105,GO:0035556	calmodulin-dependent protein kinase activity|calcium ion binding|ATP binding|nucleus|cytoplasm|abscisic acid-activated signaling pathway|calcium-dependent protein serine/threonine kinase activity|membrane|peptidyl-serine phosphorylation|intracellular signal transduction	--	--
CSS0032541	2	3.34075	5.36049e-12	1.43301e-10	PREDICTED: ethylene-responsive transcription factor ERF026-like	AP2/ERF-ERF	GO:0003677,GO:0003700,GO:0005634,GO:0009873	DNA binding|DNA-binding transcription factor activity|nucleus|ethylene-activated signaling pathway	--	--
CSS0008368	2	0.825756	3.68374e-11	9.24135e-10	Ribosomal RNA processing protein	--	GO:0000469,GO:0005730	cleavage involved in rRNA processing|nucleolus	--	--
CSS0044329	2	0.988662	0.000101149	0.00124922	Heat stress transcription factor B-2b like	HSF	GO:0000978,GO:0003700,GO:0005634,GO:0010200,GO:0034605,GO:0043565,GO:0061408	RNA polymerase II proximal promoter sequence-specific DNA binding|DNA-binding transcription factor activity|nucleus|response to chitin|cellular response to heat|sequence-specific DNA binding|positive regulation of transcription from RNA polymerase II promoter in response to heat stress	--	--
CSS0042325	1	1.0101	1.8595e-06	2.9675e-05	PREDICTED: probable copper-transporting ATPase HMA5	--	GO:0005507,GO:0005524,GO:0006825,GO:0010273,GO:0016021,GO:0019829,GO:0046688	copper ion binding|ATP binding|copper ion transport|detoxification of copper ion|integral component of membrane|cation-transporting ATPase activity|response to copper ion	ko04016	MAPK signaling pathway - plant
CSS0042681	2	1.1236	8.45808e-07	1.40435e-05	Glutathione S-transferase	--	GO:0004364,GO:0004601,GO:0005634,GO:0005737,GO:0005777,GO:0009407	glutathione transferase activity|peroxidase activity|nucleus|cytoplasm|peroxisome|toxin catabolic process	ko00480	Glutathione metabolism
CSS0014033	2	0.940909	4.8614e-09	1.03159e-07	GST_N domain-containing protein	--	GO:0004364,GO:0004601,GO:0005634,GO:0005737,GO:0005777,GO:0009407	glutathione transferase activity|peroxidase activity|nucleus|cytoplasm|peroxisome|toxin catabolic process	ko00480	Glutathione metabolism
CSS0023923	2	0.973223	4.42397e-12	1.19148e-10	glutathione peroxidase	--	GO:0004602,GO:0005737,GO:0006979,GO:0047066	glutathione peroxidase activity|cytoplasm|response to oxidative stress|phospholipid-hydroperoxide glutathione peroxidase activity	ko00480,ko00590	Glutathione metabolism|Arachidonic acid metabolism
CSS0013453	2	0.964557	3.03208e-06	4.71372e-05	uncharacterized protein LOC112036451 isoform X1	--	--	--	--	--
CSS0031193	1	0.893095	8.44491e-08	1.56293e-06	Lysine-specific demethylase	--	GO:0001227,GO:0003682,GO:0003700,GO:0005634,GO:0006355,GO:0032452,GO:0034647,GO:0035064,GO:0035097,GO:0046872,GO:0051213	DNA-binding transcription repressor activity, RNA polymerase II-specific|chromatin binding|DNA-binding transcription factor activity|nucleus|regulation of transcription, DNA-templated|histone demethylase activity|histone demethylase activity (H3-trimethyl-K4 specific)|methylated histone binding|histone methyltransferase complex|metal ion binding|dioxygenase activity	--	--
CSS0008990	1	0.945366	2.75735e-06	4.30383e-05	Chromatin remodeling protein like	--	--	--	--	--
CSS0032953	2	0.894694	5.43327e-07	9.22122e-06	Scaffold attachment factor B2	--	GO:0003723,GO:0005681,GO:0006397,GO:0008380,GO:0009644,GO:0016607,GO:0043484,GO:1990904	RNA binding|spliceosomal complex|mRNA processing|RNA splicing|response to high light intensity|nuclear speck|regulation of RNA splicing|ribonucleoprotein complex	ko03040	Spliceosome
CSS0005737	2	0.988677	5.71718e-34	4.26048e-32	Protein SPIRAL1-like	--	GO:0010005,GO:0043622	cortical microtubule, transverse to long axis|cortical microtubule organization	--	--
CSS0008894	1	1.27669	1.42296e-53	1.76646e-51	1-aminocyclopropane-1-carboxylate synthase	--	GO:0009693,GO:0009835,GO:0016847,GO:0030170	ethylene biosynthetic process|fruit ripening|1-aminocyclopropane-1-carboxylate synthase activity|pyridoxal phosphate binding	ko00270,ko04016	Cysteine and methionine metabolism|MAPK signaling pathway - plant
CSS0042206	2	0.855021	3.52951e-18	1.3686e-16	DET1- and DDB1-associated protein	--	--	--	--	--
CSS0047680	1	0.986036	1.09422e-06	1.79615e-05	respiratory burst oxidase homolog protein A	--	GO:0004601,GO:0005509,GO:0005886,GO:0016021,GO:0050664	peroxidase activity|calcium ion binding|plasma membrane|integral component of membrane|oxidoreductase activity, acting on NAD(P)H, oxygen as acceptor	ko04016,ko04626	MAPK signaling pathway - plant|Plant-pathogen interaction
CSS0020401	1	1.08941	7.14698e-09	1.48724e-07	Reticulon-like protein	--	GO:0005783,GO:0005789,GO:0005794,GO:0005886,GO:0071458,GO:0071782,GO:0071786	endoplasmic reticulum|endoplasmic reticulum membrane|Golgi apparatus|plasma membrane|integral component of cytoplasmic side of endoplasmic reticulum membrane|endoplasmic reticulum tubular network|endoplasmic reticulum tubular network organization	--	--
CSS0013403	2	0.913164	8.0292e-10	1.82244e-08	calcium-dependent protein kinase 3	--	GO:0004683,GO:0005509,GO:0005524,GO:0005634,GO:0005737,GO:0009738,GO:0009931,GO:0016020,GO:0018105,GO:0035556	calmodulin-dependent protein kinase activity|calcium ion binding|ATP binding|nucleus|cytoplasm|abscisic acid-activated signaling pathway|calcium-dependent protein serine/threonine kinase activity|membrane|peptidyl-serine phosphorylation|intracellular signal transduction	ko04626	Plant-pathogen interaction
CSS0034405	1	1.12507	6.49327e-19	2.59141e-17	Cation/H(+) antiporter like	--	GO:0005770,GO:0006813,GO:0006885,GO:0012505,GO:0015299,GO:0016021	late endosome|potassium ion transport|regulation of pH|endomembrane system|solute:proton antiporter activity|integral component of membrane	--	--
CSS0006968	2	1.11498	1.84017e-25	9.83856e-24	KAT8 regulatory NSL complex subunit like	--	--	--	--	--
CSS0008906	2	0.883928	0.000216131	0.00251497	Thioredoxin domain-containing protein	--	--	--	--	--
CSS0044618	2	0.88725	0.000212389	0.00247599	Filamin A-interacting protein	--	--	--	--	--
CSS0040137	2	0.926101	1.20648e-08	2.44908e-07	PREDICTED: 30S ribosomal protein S6 alpha, chloroplastic	--	GO:0003735,GO:0005840,GO:0006412,GO:0009507,GO:0009535,GO:0009579,GO:0070181	structural constituent of ribosome|ribosome|translation|chloroplast|chloroplast thylakoid membrane|thylakoid|small ribosomal subunit rRNA binding	ko03010	Ribosome
CSS0036748	1	1.60224	7.61457e-67	1.23706e-64	luminal-binding protein	--	GO:0005524,GO:0005788	ATP binding|endoplasmic reticulum lumen	ko03060,ko04141	Protein export|Protein processing in endoplasmic reticulum
CSS0032841	1	1.3265	1.12375e-34	8.60263e-33	luminal-binding protein	--	GO:0005524,GO:0005788	ATP binding|endoplasmic reticulum lumen	ko03060,ko04141	Protein export|Protein processing in endoplasmic reticulum
CSS0008938	2	0.980278	1.0373e-20	4.51419e-19	Lecithin retinol acyltransferase	--	--	--	--	--
CSS0024534	2	0.949908	2.19207e-13	6.50347e-12	Lecithin retinol acyltransferase	--	--	--	--	--
CSS0010961	2	1.44203	2.97151e-27	1.70222e-25	uncharacterized protein LOC112023539	--	--	--	--	--
CSS0024120	2	0.949359	2.89769e-08	5.64662e-07	PHD finger protein ALFIN-LIKE 4-like isoform X2	Alfin-like	GO:0003677,GO:0005634,GO:0006325,GO:0006355,GO:0009651,GO:0042393,GO:0045727,GO:0046872,GO:0071472	DNA binding|nucleus|chromatin organization|regulation of transcription, DNA-templated|response to salt stress|histone binding|positive regulation of translation|metal ion binding|cellular response to salt stress	--	--
CSS0010719	1	0.844995	9.36607e-10	2.11259e-08	Myosin-17 like, partial	--	GO:0003774,GO:0003779,GO:0005516,GO:0005524,GO:0007015,GO:0009506,GO:0010090,GO:0010091,GO:0016459,GO:0030048,GO:0030133,GO:0035619,GO:0048467,GO:0048767,GO:0048768,GO:0051645,GO:0051646,GO:0060151,GO:0090436	motor activity|actin binding|calmodulin binding|ATP binding|actin filament organization|plasmodesma|trichome morphogenesis|trichome branching|myosin complex|actin filament-based movement|transport vesicle|root hair tip|gynoecium development|root hair elongation|root hair cell tip growth|Golgi localization|mitochondrion localization|peroxisome localization|leaf pavement cell development	--	--
CSS0028621	2	0.861631	6.27033e-17	2.27389e-15	Pre-mRNA cleavage factor Im subunit like	--	GO:0003729,GO:0005849,GO:0006378,GO:0006397,GO:0016787,GO:0017091,GO:0046872	mRNA binding|mRNA cleavage factor complex|mRNA polyadenylation|mRNA processing|hydrolase activity|AU-rich element binding|metal ion binding	ko03015	mRNA surveillance pathway
CSS0013521	2	0.964183	6.75419e-10	1.54694e-08	30S ribosomal protein	--	--	--	ko03010	Ribosome
CSS0022538	1	1.00097	2.66567e-06	4.17234e-05	Serine/threonine-protein kinase	--	GO:0004674,GO:0005524	protein serine/threonine kinase activity|ATP binding	--	--
CSS0038639	1	1.00305	0.000275858	0.0031612	Serine/threonine-protein kinase	--	--	--	--	--
CSS0030254	2	0.900135	9.01852e-05	0.00112453	PREDICTED: telomere repeat-binding factor 4-like	MYB-related	GO:0000786,GO:0003700,GO:0005634,GO:0006334,GO:0009651,GO:0009723,GO:0009733,GO:0009751,GO:0009753,GO:0043565,GO:0046686	nucleosome|DNA-binding transcription factor activity|nucleus|nucleosome assembly|response to salt stress|response to ethylene|response to auxin|response to salicylic acid|response to jasmonic acid|sequence-specific DNA binding|response to cadmium ion	--	--
CSS0023353	1	0.89223	5.32333e-06	8.01673e-05	putative NADH:ubiquinone oxidoreductase	--	GO:0005506,GO:0008137,GO:0009535,GO:0019684,GO:0048038,GO:0051539	iron ion binding|NADH dehydrogenase (ubiquinone) activity|chloroplast thylakoid membrane|photosynthesis, light reaction|quinone binding|4 iron, 4 sulfur cluster binding	--	--
CSS0039937	1	0.9102	1.11654e-15	3.77851e-14	hypothetical protein BVC80_6087g2	--	--	--	--	--
CSS0045629	1	0.979121	0.000201431	0.00235859	diacylglycerol O-acyltransferase 1	--	GO:0004144,GO:0005789,GO:0006071,GO:0016021,GO:0019432	diacylglycerol O-acyltransferase activity|endoplasmic reticulum membrane|glycerol metabolic process|integral component of membrane|triglyceride biosynthetic process	ko00561	Glycerolipid metabolism
CSS0049748	2	0.887588	1.71838e-09	3.79576e-08	Casein kinase 1-like protein	--	GO:0004674,GO:0005524,GO:0005737,GO:0006897,GO:0009506,GO:0018105,GO:0018107	protein serine/threonine kinase activity|ATP binding|cytoplasm|endocytosis|plasmodesma|peptidyl-serine phosphorylation|peptidyl-threonine phosphorylation	--	--
CSS0025931	1	0.963774	9.58935e-05	0.00118955	Pre-mRNA-splicing factor ATP-dependent RNA helicase	--	--	--	ko03040	Spliceosome
CSS0009775	1	0.989857	3.64372e-08	7.03474e-07	ATP-binding cassette sub-family G member like	--	--	--	--	--
CSS0028809	2	0.86859	1.31049e-13	3.92952e-12	uncharacterized protein LOC110815310	--	--	--	ko00190	Oxidative phosphorylation
CSS0010848	1	1.08201	5.19643e-11	1.29017e-09	probable phospholipase A2 homolog 1	--	GO:0004623,GO:0005509,GO:0005576,GO:0006644,GO:0008289,GO:0009555,GO:0009846,GO:0009860,GO:0016042,GO:0050482,GO:0102567,GO:0102568	phospholipase A2 activity|calcium ion binding|extracellular region|phospholipid metabolic process|lipid binding|pollen development|pollen germination|pollen tube growth|lipid catabolic process|arachidonic acid secretion|phospholipase A2 activity (consuming 1,2-dipalmitoylphosphatidylcholine)|phospholipase A2 activity consuming 1,2-dioleoylphosphatidylethanolamine)	--	--
CSS0041417	2	0.964221	2.44983e-06	3.8524e-05	Caffeoyl-CoA O-methyltransferase	--	GO:0005829,GO:0008757,GO:0009809,GO:0042409,GO:0046872	cytosol|S-adenosylmethionine-dependent methyltransferase activity|lignin biosynthetic process|caffeoyl-CoA O-methyltransferase activity|metal ion binding	ko00940,ko00941,ko00945	Phenylpropanoid biosynthesis|Flavonoid biosynthesis|Stilbenoid, diarylheptanoid and gingerol biosynthesis
CSS0015852	1	0.998499	0.000182185	0.00214666	Acid phosphatase	--	GO:0003993	acid phosphatase activity	--	--
CSS0026301	2	1.12102	1.92908e-45	1.98507e-43	profilin-1	--	GO:0003779,GO:0005737,GO:0005856	actin binding|cytoplasm|cytoskeleton	--	--
CSS0000041	2	1.10007	4.69722e-62	7.0008e-60	Protein PAT1 2 like	--	--	--	--	--
CSS0009689	1	0.751527	1.77252e-22	8.33084e-21	hexokinase 1 (chloroplast)	--	GO:0001047,GO:0001678,GO:0004340,GO:0004396,GO:0005524,GO:0005536,GO:0005634,GO:0005739,GO:0005741,GO:0005773,GO:0005774,GO:0005829,GO:0006096,GO:0006357,GO:0008270,GO:0008865,GO:0009536,GO:0010148,GO:0010182,GO:0010255,GO:0012501,GO:0016020,GO:0016021,GO:0019158,GO:0019320,GO:0032991,GO:0090332	core promoter binding|cellular glucose homeostasis|glucokinase activity|hexokinase activity|ATP binding|glucose binding|nucleus|mitochondrion|mitochondrial outer membrane|vacuole|vacuolar membrane|cytosol|glycolytic process|regulation of transcription by RNA polymerase II|zinc ion binding|fructokinase activity|plastid|transpiration|sugar mediated signaling pathway|glucose mediated signaling pathw…	--	--
CSS0037618	1	0.976037	0.000635379	0.00675416	Glycerate 2-kinase	--	GO:0005737,GO:0005886,GO:0009506,GO:0010118	cytoplasm|plasma membrane|plasmodesma|stomatal movement	--	--
CSS0035564	1	0.999274	0.000368044	0.00412133	DNA-directed RNA polymerases II and IV subunit 5A like	--	GO:0000418,GO:0003677,GO:0003899,GO:0005665,GO:0005666,GO:0005736,GO:0006360,GO:0006366,GO:0006383	RNA polymerase IV complex|DNA binding|DNA-directed 5'-3' RNA polymerase activity|RNA polymerase II, core complex|RNA polymerase III complex|RNA polymerase I complex|transcription by RNA polymerase I|transcription by RNA polymerase II|transcription by RNA polymerase III	ko03020	RNA polymerase
CSS0021493	2	0.975382	1.16582e-06	1.90624e-05	auxin early response protein AUX/IAA27	--	GO:0003700,GO:0005634,GO:0009733,GO:0009734	DNA-binding transcription factor activity|nucleus|response to auxin|auxin-activated signaling pathway	ko04075	Plant hormone signal transduction
CSS0046187	1	0.947221	2.34756e-06	3.7008e-05	Protein tesmin/TSO1-like	CPP	GO:0003700,GO:0005634,GO:0006355,GO:0007275,GO:0046872	DNA-binding transcription factor activity|nucleus|regulation of transcription, DNA-templated|multicellular organism development|metal ion binding	--	--
CSS0009394	2	0.695934	7.55195e-17	2.72156e-15	Ras-related protein	--	GO:0003924,GO:0005525,GO:0005886,GO:0015031	GTPase activity|GTP binding|plasma membrane|protein transport	--	--
CSS0030825	1	1.12265	6.91449e-17	2.49896e-15	Cytochrome P450 89A2 like	--	GO:0005506,GO:0005789,GO:0016020,GO:0016021,GO:0016709,GO:0020037	iron ion binding|endoplasmic reticulum membrane|membrane|integral component of membrane|oxidoreductase activity, acting on paired donors, with incorporation or reduction of molecular oxygen, NAD(P)H as one donor, and incorporation of one atom of oxygen|heme binding	ko00380	Tryptophan metabolism
CSS0017222	1	0.72607	1.73506e-05	0.000242702	PREDICTED: uncharacterized protein LOC109000172	--	--	--	--	--
CSS0006927	2	1.05128	2.43786e-05	0.000333712	Strigolactone esterase	--	GO:0005634,GO:0005737,GO:0016787,GO:1901601	nucleus|cytoplasm|hydrolase activity|strigolactone biosynthetic process	--	--
CSS0050503	1	0.885062	9.18608e-05	0.00114373	E3 ubiquitin-protein like	--	GO:0005774,GO:0016021,GO:0016567,GO:0016740,GO:0046872	vacuolar membrane|integral component of membrane|protein ubiquitination|transferase activity|metal ion binding	--	--
CSS0045173	1	0.939446	4.46703e-05	0.000586683	acyl acyl-carrier-protein thioesterase type B, partial	--	GO:0006633,GO:0009507,GO:0016790	fatty acid biosynthetic process|chloroplast|thiolester hydrolase activity	ko00061	Fatty acid biosynthesis
CSS0045576	1	1.22644	9.37685e-06	0.000136061	phospholipase A1-IIgamma	--	GO:0005737,GO:0008970,GO:0010187,GO:0019915,GO:0046340,GO:0047372,GO:0052651	cytoplasm|phospholipase A1 activity|negative regulation of seed germination|lipid storage|diacylglycerol catabolic process|acylglycerol lipase activity|monoacylglycerol catabolic process	--	--
CSS0005191	1	0.844681	7.6489e-39	6.65165e-37	3-ketoacyl-CoA synthase 11	--	GO:0006633,GO:0009409,GO:0009416,GO:0016021,GO:0102336,GO:0102337,GO:0102338,GO:0102756	fatty acid biosynthetic process|response to cold|response to light stimulus|integral component of membrane|3-oxo-arachidoyl-CoA synthase activity|3-oxo-cerotoyl-CoA synthase activity|3-oxo-lignoceronyl-CoA synthase activity|very-long-chain 3-ketoacyl-CoA synthase activity	--	--
CSS0047967	2	0.964288	0.000123421	0.00150206	probable histone H2A variant 3	--	GO:0000786,GO:0000790,GO:0003677,GO:0005773,GO:0006325,GO:0009266,GO:0042742,GO:0046982	nucleosome|nuclear chromatin|DNA binding|vacuole|chromatin organization|response to temperature stimulus|defense response to bacterium|protein heterodimerization activity	--	--
CSS0032516	2	0.782792	1.26733e-17	4.78921e-16	GTP-binding nuclear protein Ran-3-like	--	GO:0003924,GO:0005525,GO:0005634,GO:0006913,GO:0015031	GTPase activity|GTP binding|nucleus|nucleocytoplasmic transport|protein transport	ko03008,ko03013	Ribosome biogenesis in eukaryotes|RNA transport
CSS0037505	2	0.732438	1.26995e-24	6.51413e-23	Acyl-protein like isoform 2	--	GO:0005737,GO:0006631,GO:0052689	cytoplasm|fatty acid metabolic process|carboxylic ester hydrolase activity	ko00564	Glycerophospholipid metabolism
CSS0026756	2	0.854595	1.04407e-05	0.000150805	GPI-anchored adhesin-like protein precursor	--	--	--	--	--
CSS0029549	2	6.18426	5.58558e-36	4.45832e-34	hypothetical protein DCAR_017836	--	GO:0009877,GO:0016021	nodulation|integral component of membrane	--	--
CSS0024124	2	0.871055	0.00050872	0.00554304	unnamed protein product, partial	--	GO:0003676,GO:0005829	nucleic acid binding|cytosol	--	--
CSS0040176	1	1.54264	9.67184e-21	4.2163e-19	Adenine nucleotide transporter like	--	GO:0005739,GO:0005743,GO:0009507,GO:0009536,GO:0009706,GO:0009941,GO:0016021,GO:0022857	mitochondrion|mitochondrial inner membrane|chloroplast|plastid|chloroplast inner membrane|chloroplast envelope|integral component of membrane|transmembrane transporter activity	--	--
CSS0047964	2	0.945025	0.000358018	0.00402153	hypothetical protein AQUCO_00100184v1, partial	--	GO:0003735,GO:0005730,GO:0006412,GO:0022627	structural constituent of ribosome|nucleolus|translation|cytosolic small ribosomal subunit	ko03010	Ribosome
CSS0002896	1	0.911357	0.0001435	0.00172504	EIN3-binding F-box protein	--	GO:0005634,GO:0006511,GO:0009723,GO:0009873,GO:0010105,GO:0016567,GO:0019005,GO:0031146	nucleus|ubiquitin-dependent protein catabolic process|response to ethylene|ethylene-activated signaling pathway|negative regulation of ethylene-activated signaling pathway|protein ubiquitination|SCF ubiquitin ligase complex|SCF-dependent proteasomal ubiquitin-dependent protein catabolic process	ko04016,ko04075	MAPK signaling pathway - plant|Plant hormone signal transduction
CSS0008049	1	1.05132	0.000429909	0.00475716	Blue copper protein	--	GO:0009055,GO:0046872	electron transfer activity|metal ion binding	--	--
CSS0001300	2	1.18391	1.34042e-09	2.98478e-08	raffinose synthase 1	--	GO:0010325,GO:0047274	raffinose family oligosaccharide biosynthetic process|galactinol-sucrose galactosyltransferase activity	--	--
CSS0044054	2	0.973448	2.47216e-47	2.64631e-45	Ricin B lectin domain	--	GO:0005634,GO:0005737,GO:0030246,GO:0042742,GO:0090332	nucleus|cytoplasm|carbohydrate binding|defense response to bacterium|stomatal closure	--	--
CSS0015295	1	0.831809	2.51051e-07	4.4258e-06	Calmodulin-binding receptor-like cytoplasmic kinase 3	--	--	--	--	--
CSS0030637	2	0.917459	1.02799e-09	2.31355e-08	Codeine O-demethylase	--	GO:0008168,GO:0046872,GO:0097295,GO:0102803,GO:0102805	methyltransferase activity|metal ion binding|morphine biosynthetic process|thebane O-demethylase activity|codeine O-demethylase activity	--	--
CSS0028792	2	0.924842	1.10217e-14	3.53792e-13	hypothetical protein CEY00_Acc18769	--	GO:0010150,GO:0016682,GO:0046872,GO:0051213	leaf senescence|oxidoreductase activity, acting on diphenols and related substances as donors, oxygen as acceptor|metal ion binding|dioxygenase activity	--	--
CSS0008716	2	0.973617	0.000215681	0.00251089	uncharacterized protein At1g04910	--	--	--	--	--
CSS0006752	1	0.965005	2.31684e-11	5.90906e-10	Phosphate transporter like	--	--	--	--	--
CSS0010842	2	0.784755	3.19196e-11	8.04761e-10	PREDICTED: bet1-like SNARE 1-1	--	GO:0000139,GO:0005634,GO:0005789,GO:0005886,GO:0015031,GO:0016021,GO:0016192	Golgi membrane|nucleus|endoplasmic reticulum membrane|plasma membrane|protein transport|integral component of membrane|vesicle-mediated transport	ko04130	SNARE interactions in vesicular transport
CSS0035101	1	1.11596	7.52349e-11	1.84706e-09	hypothetical protein F511_24636	--	--	--	--	--
CSS0014288	2	0.813141	7.87662e-20	3.29989e-18	hypothetical protein EUTSA_v10017500mg	--	--	--	--	--
CSS0040541	2	0.962577	1.61621e-05	0.000227083	Mitochondrial import receptor subunit TOM7-1	--	GO:0005742,GO:0016021,GO:0030150	mitochondrial outer membrane translocase complex|integral component of membrane|protein import into mitochondrial matrix	--	--
CSS0005946	2	0.767088	9.59422e-34	7.05601e-32	hypothetical protein DCAR_009533	--	GO:0000243,GO:0000387,GO:0000398,GO:0003723,GO:0005682,GO:0005685,GO:0005686,GO:0005687,GO:0005689,GO:0005730,GO:0005829,GO:0034715,GO:0034719,GO:0048589,GO:0071013	commitment complex|spliceosomal snRNP assembly|mRNA splicing, via spliceosome|RNA binding|U5 snRNP|U1 snRNP|U2 snRNP|U4 snRNP|U12-type spliceosomal complex|nucleolus|cytosol|pICln-Sm protein complex|SMN-Sm protein complex|developmental growth|catalytic step 2 spliceosome	ko03040	Spliceosome
CSS0006684	1	0.865193	0.00046365	0.00510035	pyrophosphate-energized membrane proton pump 2	--	GO:0000139,GO:0004427,GO:0005768,GO:0005773,GO:0005794,GO:0005802,GO:0009678,GO:0016021,GO:0046872,GO:1902600	Golgi membrane|inorganic diphosphatase activity|endosome|vacuole|Golgi apparatus|trans-Golgi network|hydrogen-translocating pyrophosphatase activity|integral component of membrane|metal ion binding|proton transmembrane transport	--	--
CSS0046788	2	0.914151	3.02862e-08	5.89222e-07	Reticulon-like protein	--	GO:0005789,GO:0016021	endoplasmic reticulum membrane|integral component of membrane	--	--
CSS0004469	2	1.01223	8.26842e-05	0.00103921	PREDICTED: uncharacterized protein LOC109167519	--	GO:0000943,GO:0003676,GO:0003964,GO:0004190,GO:0004519,GO:0006310,GO:0015074,GO:0046872	retrotransposon nucleocapsid|nucleic acid binding|RNA-directed DNA polymerase activity|aspartic-type endopeptidase activity|endonuclease activity|DNA recombination|DNA integration|metal ion binding	--	--
CSS0028180	1	0.828371	0.000778897	0.00813599	PREDICTED: V-type proton ATPase catalytic subunit A	--	GO:0005524,GO:0015991,GO:0033180,GO:0046034,GO:0046961	ATP binding|ATP hydrolysis coupled proton transport|proton-transporting V-type ATPase, V1 domain|ATP metabolic process|proton-transporting ATPase activity, rotational mechanism	ko00190,ko04145	Oxidative phosphorylation|Phagosome
CSS0035377	2	0.652685	3.85032e-38	3.30846e-36	PREDICTED: protein FAM32A-like isoform X1	--	--	--	ko00100	Steroid biosynthesis
CSS0028266	2	0.845938	8.37276e-30	5.3346e-28	Protein phosphatase methylesterase	--	--	--	--	--
CSS0040794	2	0.980955	6.35697e-09	1.32996e-07	F-box/kelch-repeat protein	--	GO:0005634,GO:0005829,GO:0007623,GO:0009637,GO:0019005	nucleus|cytosol|circadian rhythm|response to blue light|SCF ubiquitin ligase complex	--	--
CSS0007971	1	0.942583	2.34764e-10	5.57138e-09	Mannosyl-oligosaccharide 1,2-alpha-mannosidase	--	GO:0000139,GO:0004559,GO:0004571,GO:0005509,GO:0005768,GO:0005783,GO:0005794,GO:0005802,GO:0006486,GO:0006491,GO:0016021	Golgi membrane|alpha-mannosidase activity|mannosyl-oligosaccharide 1,2-alpha-mannosidase activity|calcium ion binding|endosome|endoplasmic reticulum|Golgi apparatus|trans-Golgi network|protein glycosylation|N-glycan processing|integral component of membrane	ko00510,ko00513,ko04141	N-Glycan biosynthesis|Various types of N-glycan biosynthesis|Protein processing in endoplasmic reticulum
CSS0038887	2	0.889379	1.04222e-06	1.71357e-05	Kinesin-like protein	--	--	--	--	--
CSS0039856	1	0.952428	0.000410753	0.00455816	Receptor-like protein kinase	--	GO:0004674,GO:0005524,GO:0005576,GO:0005886,GO:0006468,GO:0016021,GO:0019199	protein serine/threonine kinase activity|ATP binding|extracellular region|plasma membrane|protein phosphorylation|integral component of membrane|transmembrane receptor protein kinase activity	--	--
CSS0038482	2	0.903136	1.55228e-05	0.000218647	Phosphoesterase domain protein	--	GO:0005783,GO:0005789,GO:0006506,GO:0006888,GO:0016021,GO:0016787	endoplasmic reticulum|endoplasmic reticulum membrane|GPI anchor biosynthetic process|ER to Golgi vesicle-mediated transport|integral component of membrane|hydrolase activity	--	--
CSS0012252	2	0.806302	7.06828e-16	2.43107e-14	putative proteasome subunit alpha type-5	--	GO:0004175,GO:0004298,GO:0005634,GO:0005737,GO:0005839,GO:0010498,GO:0010499,GO:0019773,GO:0043161	endopeptidase activity|threonine-type endopeptidase activity|nucleus|cytoplasm|proteasome core complex|proteasomal protein catabolic process|proteasomal ubiquitin-independent protein catabolic process|proteasome core complex, alpha-subunit complex|proteasome-mediated ubiquitin-dependent protein catabolic process	ko03050	Proteasome
CSS0007314	1	1.1396	1.37215e-29	8.68771e-28	Pectinesterase	--	GO:0004857,GO:0005576,GO:0005618,GO:0030599,GO:0042545,GO:0045330,GO:0045490	enzyme inhibitor activity|extracellular region|cell wall|pectinesterase activity|cell wall modification|aspartyl esterase activity|pectin catabolic process	--	--
CSS0041210	2	0.471719	1.23359e-26	6.8718e-25	Ethylene-responsive transcription factor RAP2-12 like, partial	AP2/ERF-ERF	GO:0001666,GO:0003677,GO:0003700,GO:0005634,GO:0009873,GO:0010468	response to hypoxia|DNA binding|DNA-binding transcription factor activity|nucleus|ethylene-activated signaling pathway|regulation of gene expression	--	--
CSS0017690	2	1.43236	1.14496e-26	6.39219e-25	Auxin-responsive protein	--	GO:0005634,GO:0005737,GO:0007275,GO:0009733,GO:0009873,GO:0019897,GO:0030307	nucleus|cytoplasm|multicellular organism development|response to auxin|ethylene-activated signaling pathway|extrinsic component of plasma membrane|positive regulation of cell growth	--	--
CSS0036669	1	0.881528	5.27852e-05	0.000685421	Transcription factor SPT20-like	--	GO:0005634,GO:0005737,GO:0007623,GO:0009416,GO:0009908,GO:0016604,GO:0048510,GO:0048574	nucleus|cytoplasm|circadian rhythm|response to light stimulus|flower development|nuclear body|regulation of timing of transition from vegetative to reproductive phase|long-day photoperiodism, flowering	--	--
CSS0033932	2	0.940616	1.34871e-08	2.71922e-07	Peroxisomal (S)-2-hydroxy-acid oxidase	--	GO:0005777,GO:0009854,GO:0010181,GO:0042742,GO:0050665,GO:0052852,GO:0052853,GO:0052854	peroxisome|oxidative photosynthetic carbon pathway|FMN binding|defense response to bacterium|hydrogen peroxide biosynthetic process|very-long-chain-(S)-2-hydroxy-acid oxidase activity|long-chain-(S)-2-hydroxy-long-chain-acid oxidase activity|medium-chain-(S)-2-hydroxy-acid oxidase activity	ko00630,ko04146	Glyoxylate and dicarboxylate metabolism|Peroxisome
CSS0021380	2	0.744426	1.31287e-07	2.38521e-06	oligouridylate-binding protein 1B	--	GO:0003729,GO:0005634,GO:0006397	mRNA binding|nucleus|mRNA processing	--	--
CSS0046920	2	0.834875	1.20993e-07	2.20454e-06	aldehyde dehydrogenase family 7 member B4	--	GO:0004029,GO:0004043,GO:0005829,GO:0006081,GO:0009269,GO:0009651,GO:0009737,GO:0043878	aldehyde dehydrogenase (NAD) activity|L-aminoadipate-semialdehyde dehydrogenase activity|cytosol|cellular aldehyde metabolic process|response to desiccation|response to salt stress|response to abscisic acid|glyceraldehyde-3-phosphate dehydrogenase (NAD+) (non-phosphorylating) activity	ko00010,ko00053,ko00071,ko00260,ko00280,ko00310,ko00330,ko00340,ko00380,ko00410,ko00561,ko00620	Glycolysis / Gluconeogenesis|Ascorbate and aldarate metabolism|Fatty acid degradation|Glycine, serine and threonine metabolism|Valine, leucine and isoleucine degradation|Lysine degradation|Arginine and proline metabolism|Histidine metabolism|Tryptophan metabolism|beta-Alanine metabolism|Glycerolipid metabolism|Pyruvate metabolism
CSS0032858	1	1.25132	1.71039e-17	6.41556e-16	flavonoid 3'-hydroxylase 3	--	GO:0004497,GO:0005506,GO:0005789,GO:0009813,GO:0016021,GO:0016705,GO:0020037	monooxygenase activity|iron ion binding|endoplasmic reticulum membrane|flavonoid biosynthetic process|integral component of membrane|oxidoreductase activity, acting on paired donors, with incorporation or reduction of molecular oxygen|heme binding	ko00905	Brassinosteroid biosynthesis
CSS0014209	1	1.04439	7.89716e-12	2.08957e-10	flavonoid 3'-hydroxylase 3	--	GO:0004497,GO:0005506,GO:0005789,GO:0009813,GO:0016021,GO:0016705,GO:0020037	monooxygenase activity|iron ion binding|endoplasmic reticulum membrane|flavonoid biosynthetic process|integral component of membrane|oxidoreductase activity, acting on paired donors, with incorporation or reduction of molecular oxygen|heme binding	ko00905	Brassinosteroid biosynthesis
CSS0000574	1	0.927163	3.88916e-05	0.000515342	Exportin-T like	--	GO:0000049,GO:0005049,GO:0005643,GO:0005737,GO:0005829,GO:0006409,GO:0008033,GO:0008536,GO:0009908,GO:0010014,GO:0016363,GO:0071528	tRNA binding|nuclear export signal receptor activity|nuclear pore|cytoplasm|cytosol|tRNA export from nucleus|tRNA processing|Ran GTPase binding|flower development|meristem initiation|nuclear matrix|tRNA re-export from nucleus	ko03013	RNA transport
CSS0031925	2	0.865971	1.52291e-06	2.45595e-05	unnamed protein product, partial	--	GO:0000124,GO:0005669,GO:0006366,GO:0008134,GO:0043966,GO:0044212,GO:0045944,GO:0046982,GO:0051123	SAGA complex|transcription factor TFIID complex|transcription by RNA polymerase II|transcription factor binding|histone H3 acetylation|transcription regulatory region DNA binding|positive regulation of transcription by RNA polymerase II|protein heterodimerization activity|RNA polymerase II preinitiation complex assembly	ko03022	Basal transcription factors
CSS0025170	2	0.924038	1.30552e-05	0.000186122	unnamed protein product, partial	--	GO:0003684,GO:0003723,GO:0003735,GO:0003906,GO:0005634,GO:0005730,GO:0005829,GO:0006281,GO:0006412,GO:0008534,GO:0009506,GO:0009651,GO:0016020,GO:0022626,GO:0022627,GO:0032357,GO:0045739	damaged DNA binding|RNA binding|structural constituent of ribosome|DNA-(apurinic or apyrimidinic site) endonuclease activity|nucleus|nucleolus|cytosol|DNA repair|translation|oxidized purine nucleobase lesion DNA N-glycosylase activity|plasmodesma|response to salt stress|membrane|cytosolic ribosome|cytosolic small ribosomal subunit|oxidized purine DNA binding|positive regulation of DNA repair	ko03010	Ribosome
CSS0039483	2	0.953884	2.37273e-07	4.19608e-06	PREDICTED: 40S ribosomal protein S3-3	--	GO:0003684,GO:0003723,GO:0003735,GO:0003906,GO:0005634,GO:0005730,GO:0005829,GO:0006281,GO:0006412,GO:0008534,GO:0009506,GO:0009651,GO:0016020,GO:0022626,GO:0022627,GO:0032357,GO:0045739	damaged DNA binding|RNA binding|structural constituent of ribosome|DNA-(apurinic or apyrimidinic site) endonuclease activity|nucleus|nucleolus|cytosol|DNA repair|translation|oxidized purine nucleobase lesion DNA N-glycosylase activity|plasmodesma|response to salt stress|membrane|cytosolic ribosome|cytosolic small ribosomal subunit|oxidized purine DNA binding|positive regulation of DNA repair	ko03010	Ribosome
CSS0030042	2	0.905783	0.000378777	0.00423027	PHD finger protein ALFIN-LIKE 4-like isoform X2	Alfin-like	GO:0003677,GO:0003714,GO:0005634,GO:0006325,GO:0006355,GO:0009414,GO:0009651,GO:0042393,GO:0046872	DNA binding|transcription corepressor activity|nucleus|chromatin organization|regulation of transcription, DNA-templated|response to water deprivation|response to salt stress|histone binding|metal ion binding	--	--
CSS0025029	1	1.11374	1.61742e-14	5.14935e-13	Protein of unknown function DUF761, plant protein	--	--	--	--	--
CSS0024138	2	0.994526	0.000279505	0.00319936	Coatomer subunit zeta-1 like	--	GO:0000139,GO:0006886,GO:0006890,GO:0006891,GO:0030126	Golgi membrane|intracellular protein transport|retrograde vesicle-mediated transport, Golgi to ER|intra-Golgi vesicle-mediated transport|COPI vesicle coat	--	--
CSS0021005	2	0.905266	9.17931e-07	1.51961e-05	Coatomer subunit zeta-1 like	--	GO:0000139,GO:0006886,GO:0006890,GO:0006891,GO:0030126	Golgi membrane|intracellular protein transport|retrograde vesicle-mediated transport, Golgi to ER|intra-Golgi vesicle-mediated transport|COPI vesicle coat	--	--
CSS0038430	2	0.794731	7.61845e-09	1.58014e-07	Nucleosome assembly protein like	--	GO:0005634,GO:0005737,GO:0006334	nucleus|cytoplasm|nucleosome assembly	--	--
CSS0015878	1	1.12395	4.32256e-60	6.31206e-58	invertase 6	--	GO:0004564,GO:0005618,GO:0005886,GO:0005975,GO:0009611,GO:0048046,GO:0050832,GO:0080167	beta-fructofuranosidase activity|cell wall|plasma membrane|carbohydrate metabolic process|response to wounding|apoplast|defense response to fungus|response to karrikin	ko00052,ko00500	Galactose metabolism|Starch and sucrose metabolism
CSS0035007	1	1.16341	1.58878e-06	2.55728e-05	cell wall invertase INV13	--	GO:0004564,GO:0005618,GO:0005886,GO:0005975,GO:0009611,GO:0048046,GO:0050832,GO:0080167	beta-fructofuranosidase activity|cell wall|plasma membrane|carbohydrate metabolic process|response to wounding|apoplast|defense response to fungus|response to karrikin	ko00052,ko00500	Galactose metabolism|Starch and sucrose metabolism
CSS0050252	2	0.94516	8.39717e-11	2.0496e-09	NDR1/HIN1-like protein 6	--	GO:0005886,GO:0009506,GO:0016021,GO:0042742	plasma membrane|plasmodesma|integral component of membrane|defense response to bacterium	--	--
CSS0046354	1	0.921166	2.00159e-05	0.000277831	Protein ROOT HAIR DEFECTIVE like	--	GO:0000139,GO:0003924,GO:0005525,GO:0005737,GO:0005774,GO:0005783,GO:0005789,GO:0005886,GO:0006888,GO:0007029,GO:0009832,GO:0009932,GO:0010053,GO:0016021,GO:0016320,GO:0030036,GO:0048309	Golgi membrane|GTPase activity|GTP binding|cytoplasm|vacuolar membrane|endoplasmic reticulum|endoplasmic reticulum membrane|plasma membrane|ER to Golgi vesicle-mediated transport|endoplasmic reticulum organization|plant-type cell wall biogenesis|cell tip growth|root epidermal cell differentiation|integral component of membrane|endoplasmic reticulum membrane fusion|actin cytoskeleton organization|…	--	--
CSS0017100	2	1.11227	7.21565e-09	1.50091e-07	beta-galactosidase	--	GO:0004565,GO:0005618,GO:0005773,GO:0005975,GO:0030246	beta-galactosidase activity|cell wall|vacuole|carbohydrate metabolic process|carbohydrate binding	--	--
CSS0026189	2	0.944698	5.35424e-05	0.000694183	PREDICTED: PRA1 family protein F3-like	--	GO:0005783,GO:0005789,GO:0016021,GO:0016192	endoplasmic reticulum|endoplasmic reticulum membrane|integral component of membrane|vesicle-mediated transport	--	--
CSS0031715	2	0.795052	4.79832e-05	0.000626934	Ubiquitin carboxyl-terminal hydrolase	--	GO:0005516,GO:0006511,GO:0009506,GO:0016579,GO:0036459	calmodulin binding|ubiquitin-dependent protein catabolic process|plasmodesma|protein deubiquitination|thiol-dependent ubiquitinyl hydrolase activity	--	--
CSS0041966	2	0.91812	3.26381e-07	5.66096e-06	60S ribosomal protein like	--	GO:0003735,GO:0005886,GO:0006412,GO:0009506,GO:0022625	structural constituent of ribosome|plasma membrane|translation|plasmodesma|cytosolic large ribosomal subunit	ko03010	Ribosome
CSS0025150	2	0.804828	5.66426e-14	1.72506e-12	unnamed protein product, partial	--	GO:0003735,GO:0005730,GO:0006412,GO:0022627	structural constituent of ribosome|nucleolus|translation|cytosolic small ribosomal subunit	ko03010	Ribosome
CSS0043653	1	0.959874	5.72423e-06	8.58974e-05	LRR receptor-like serine/threonine-protein kinase precursor	--	--	--	--	--
CSS0027495	2	0.902518	4.40056e-06	6.68687e-05	Mediator of RNA polymerase II transcription subunit like	--	GO:0003712,GO:0006357,GO:0016592	transcription coregulator activity|regulation of transcription by RNA polymerase II|mediator complex	--	--
CSS0027783	2	1.3629	4.24268e-10	9.88295e-09	Inositol oxygenase	--	GO:0005506,GO:0005737,GO:0019310,GO:0019853,GO:0050113	iron ion binding|cytoplasm|inositol catabolic process|L-ascorbic acid biosynthetic process|inositol oxygenase activity	ko00053,ko00562	Ascorbate and aldarate metabolism|Inositol phosphate metabolism
CSS0006437	2	1.16382	7.25838e-13	2.07897e-11	U3 small nucleolar RNA-associated protein like	--	--	--	--	--
CSS0045428	1	0.908048	8.60662e-39	7.47164e-37	Nuclear poly(A) polymerase	--	GO:0003723,GO:0004652,GO:0005524,GO:0005634,GO:0006378,GO:0043631,GO:0046872	RNA binding|polynucleotide adenylyltransferase activity|ATP binding|nucleus|mRNA polyadenylation|RNA polyadenylation|metal ion binding	ko03015	mRNA surveillance pathway
CSS0014643	2	0.937833	2.71805e-28	1.61945e-26	auxin early response protein AUX/IAA26	--	GO:0003700,GO:0005634,GO:0009733,GO:0009734	DNA-binding transcription factor activity|nucleus|response to auxin|auxin-activated signaling pathway	ko04075	Plant hormone signal transduction
CSS0004774	2	0.904163	3.19418e-64	4.95049e-62	Clavaminate synthase-like protein	--	GO:0005634,GO:0016702,GO:0046872	nucleus|oxidoreductase activity, acting on single donors with incorporation of molecular oxygen, incorporation of two atoms of oxygen|metal ion binding	--	--
CSS0021650	1	1.10886	1.7294e-56	2.31159e-54	ABC transporter G family member 36 like	--	GO:0005524,GO:0005739,GO:0005774,GO:0005886,GO:0006855,GO:0009507,GO:0009627,GO:0009737,GO:0009817,GO:0009941,GO:0015086,GO:0015691,GO:0016020,GO:0016021,GO:0031348,GO:0042344,GO:0042626,GO:0042742,GO:0052544,GO:0055085,GO:0071366	ATP binding|mitochondrion|vacuolar membrane|plasma membrane|drug transmembrane transport|chloroplast|systemic acquired resistance|response to abscisic acid|defense response to fungus, incompatible interaction|chloroplast envelope|cadmium ion transmembrane transporter activity|cadmium ion transport|membrane|integral component of membrane|negative regulation of defense response|indole glucosinolate…	--	--
CSS0043858	1	0.906434	1.3217e-09	2.94699e-08	Casein kinase 1-like protein	--	GO:0004674,GO:0005524,GO:0005634,GO:0005737,GO:0006897,GO:0009740,GO:0009908,GO:0010476,GO:0018105,GO:0018107,GO:0040008,GO:0048586	protein serine/threonine kinase activity|ATP binding|nucleus|cytoplasm|endocytosis|gibberellic acid mediated signaling pathway|flower development|gibberellin mediated signaling pathway|peptidyl-serine phosphorylation|peptidyl-threonine phosphorylation|regulation of growth|regulation of long-day photoperiodism, flowering	--	--
CSS0003416	2	0.943823	9.74586e-05	0.00120689	Ran guanine nucleotide release factor	--	GO:0005634,GO:0005737,GO:0005829,GO:0006606,GO:0007049,GO:0008536,GO:0016973,GO:0023052,GO:0051301	nucleus|cytoplasm|cytosol|protein import into nucleus|cell cycle|Ran GTPase binding|poly(A)+ mRNA export from nucleus|signaling|cell division	--	--
CSS0042070	2	1.58003	1.34531e-82	2.90477e-80	aquaporin protein 12	--	GO:0000326,GO:0005618,GO:0005773,GO:0005774,GO:0005794,GO:0005886,GO:0006833,GO:0009505,GO:0009506,GO:0009507,GO:0009705,GO:0009941,GO:0015200,GO:0015250,GO:0016021,GO:0042802,GO:0042807	protein storage vacuole|cell wall|vacuole|vacuolar membrane|Golgi apparatus|plasma membrane|water transport|plant-type cell wall|plasmodesma|chloroplast|plant-type vacuole membrane|chloroplast envelope|methylammonium transmembrane transporter activity|water channel activity|integral component of membrane|identical protein binding|central vacuole	--	--
CSS0031663	2	0.905541	3.70196e-05	0.000491826	isochorismatase hydrolase family protein	--	GO:0003824	catalytic activity	--	--
CSS0016455	2	0.907764	4.59273e-07	7.84741e-06	unnamed protein product	--	GO:0000312,GO:0003735,GO:0009507,GO:0009534,GO:0009570,GO:0009941,GO:0019843,GO:0022627,GO:0032544	plastid small ribosomal subunit|structural constituent of ribosome|chloroplast|chloroplast thylakoid|chloroplast stroma|chloroplast envelope|rRNA binding|cytosolic small ribosomal subunit|plastid translation	ko03010	Ribosome
CSS0043485	2	0.922176	3.96249e-06	6.06864e-05	protein CURVATURE THYLAKOID 1C, chloroplastic	--	GO:0009507,GO:0009535,GO:0016021	chloroplast|chloroplast thylakoid membrane|integral component of membrane	--	--
CSS0001890	2	1.00528	8.31147e-49	9.29065e-47	unnamed protein product	--	GO:0000312,GO:0003735,GO:0009507,GO:0009534,GO:0009570,GO:0009941,GO:0019843,GO:0022627,GO:0032544	plastid small ribosomal subunit|structural constituent of ribosome|chloroplast|chloroplast thylakoid|chloroplast stroma|chloroplast envelope|rRNA binding|cytosolic small ribosomal subunit|plastid translation	ko03010	Ribosome
CSS0022866	2	0.897014	1.85175e-124	7.03455e-122	hypothetical protein CUMW_132100	--	GO:0009535,GO:0009538,GO:0015979,GO:0016021	chloroplast thylakoid membrane|photosystem I reaction center|photosynthesis|integral component of membrane	ko00195	Photosynthesis
CSS0035697	2	0.95169	6.93416e-10	1.58672e-08	uncharacterized protein LOC105157642	--	--	--	--	--
CSS0000508	2	0.932791	8.83001e-05	0.00110375	Mucin-5AC like	--	--	--	--	--
CSS0005923	2	0.89184	9.28813e-06	0.000134929	ras-related protein Rab7	--	GO:0003924,GO:0005525,GO:0005886,GO:0015031	GTPase activity|GTP binding|plasma membrane|protein transport	ko04144,ko04145	Endocytosis|Phagosome
CSS0028003	2	0.426853	6.68889e-126	2.59966e-123	translation machinery-associated protein 7 isoform X1	--	--	--	--	--
CSS0038963	2	1.10709	3.28284e-17	1.21158e-15	F-box/kelch-repeat protein	--	GO:0005829,GO:0080037,GO:2000762	cytosol|negative regulation of cytokinin-activated signaling pathway|regulation of phenylpropanoid metabolic process	--	--
CSS0021180	2	0.862921	4.91745e-11	1.22331e-09	Histone H2A variant like	--	GO:0000786,GO:0000790,GO:0003677,GO:0005773,GO:0006325,GO:0009266,GO:0042742,GO:0046982	nucleosome|nuclear chromatin|DNA binding|vacuole|chromatin organization|response to temperature stimulus|defense response to bacterium|protein heterodimerization activity	--	--
CSS0040650	1	0.968844	0.000275055	0.00315271	Epoxide hydrolase-like protein	--	--	--	--	--
CSS0016563	2	0.709906	7.82421e-52	9.32355e-50	Caffeoylshikimate esterase	--	GO:0003846,GO:0004622,GO:0005783,GO:0005794,GO:0005886,GO:0006979,GO:0009506,GO:0009809,GO:0010043,GO:0016020,GO:0016787,GO:0042542,GO:0046686,GO:0090430	2-acylglycerol O-acyltransferase activity|lysophospholipase activity|endoplasmic reticulum|Golgi apparatus|plasma membrane|response to oxidative stress|plasmodesma|lignin biosynthetic process|response to zinc ion|membrane|hydrolase activity|response to hydrogen peroxide|response to cadmium ion|caffeoyl-CoA: alcohol caffeoyl transferase activity	ko00940	Phenylpropanoid biosynthesis
CSS0036684	1	0.948055	3.31582e-06	5.12016e-05	Serine-threonine kinase receptor-associated protein	--	GO:0001732,GO:0002188,GO:0003743,GO:0010494,GO:0016282,GO:0033290,GO:0034399,GO:0043614,GO:0071470,GO:0071540,GO:0071541	formation of cytoplasmic translation initiation complex|translation reinitiation|translation initiation factor activity|cytoplasmic stress granule|eukaryotic 43S preinitiation complex|eukaryotic 48S preinitiation complex|nuclear periphery|multi-eIF complex|cellular response to osmotic stress|eukaryotic translation initiation factor 3 complex, eIF3e|eukaryotic translation initiation factor 3 compl…	--	--
CSS0047023	2	0.922708	0.000431944	0.00477863	hypothetical protein B456_010G066000	--	GO:0003924,GO:0005525,GO:0005618,GO:0005634,GO:0005737,GO:0005794,GO:0005829,GO:0005886,GO:0006606,GO:0009651,GO:0046686,GO:0048046	GTPase activity|GTP binding|cell wall|nucleus|cytoplasm|Golgi apparatus|cytosol|plasma membrane|protein import into nucleus|response to salt stress|response to cadmium ion|apoplast	ko03008,ko03013	Ribosome biogenesis in eukaryotes|RNA transport
CSS0040272	2	0.913889	6.43148e-09	1.34444e-07	Cytochrome c oxidase subunit 5b-1 like	--	GO:0004129,GO:0005739,GO:0005751,GO:0006123,GO:0008270,GO:0009535,GO:0042776,GO:0046872,GO:0050897	cytochrome-c oxidase activity|mitochondrion|mitochondrial respiratory chain complex IV|mitochondrial electron transport, cytochrome c to oxygen|zinc ion binding|chloroplast thylakoid membrane|mitochondrial ATP synthesis coupled proton transport|metal ion binding|cobalt ion binding	ko00190	Oxidative phosphorylation
CSS0043623	2	0.569893	7.92664e-23	3.79255e-21	hypothetical protein CEY00_Acc22219	--	GO:0005886	plasma membrane	--	--
CSS0000700	2	0.781321	9.14119e-07	1.51379e-05	DNA topoisomerase	--	--	--	--	--
CSS0005308	2	0.808475	0.00061786	0.00658222	PTI1-like tyrosine-protein kinase	--	--	--	--	--
CSS0033149	1	0.994526	0.000610296	0.00651218	Glycosyltransferase 39 like protein, partial	--	GO:0005783,GO:0016020,GO:0042742,GO:0050832,GO:0052033	endoplasmic reticulum|membrane|defense response to bacterium|defense response to fungus|pathogen-associated molecular pattern dependent induction by symbiont of host innate immune response	--	--
CSS0000337	2	1.07373	4.94768e-15	1.61905e-13	40S ribosomal protein, partial	--	GO:0003735,GO:0005840,GO:0006412	structural constituent of ribosome|ribosome|translation	ko03010	Ribosome
CSS0014577	1	1.02423	0.000770985	0.00806001	hydroxyethylthiazole kinase-like	--	GO:0004417,GO:0005524,GO:0009228,GO:0009229,GO:0036172,GO:0046872	hydroxyethylthiazole kinase activity|ATP binding|thiamine biosynthetic process|thiamine diphosphate biosynthetic process|thiamine salvage|metal ion binding	ko00730	Thiamine metabolism
CSS0006561	2	0.959692	0.000146532	0.00175856	Vesicle transport protein	--	--	--	ko04130	SNARE interactions in vesicular transport
CSS0014583	2	1.09185	6.46904e-254	7.2633e-251	putative DnaJ protein	--	GO:0005634,GO:0009416,GO:0009507,GO:0009570	nucleus|response to light stimulus|chloroplast|chloroplast stroma	--	--
CSS0017597	2	0.860461	2.69391e-16	9.48502e-15	probable protein phosphatase 2C 60	--	GO:0004722,GO:0005886,GO:0046872	protein serine/threonine phosphatase activity|plasma membrane|metal ion binding	--	--
CSS0043321	2	0.905541	0.000821712	0.00852505	Glucose-6-phosphate 1-epimerase	--	GO:0005975,GO:0030246,GO:0047938	carbohydrate metabolic process|carbohydrate binding|glucose-6-phosphate 1-epimerase activity	ko00010	Glycolysis / Gluconeogenesis
CSS0007482	2	0.954251	7.63461e-05	0.000965311	ACT domain-containing protein	--	GO:0009409,GO:0009416,GO:0009507,GO:0009535,GO:0009570,GO:0009735,GO:0009744,GO:0009941,GO:0010319	response to cold|response to light stimulus|chloroplast|chloroplast thylakoid membrane|chloroplast stroma|response to cytokinin|response to sucrose|chloroplast envelope|stromule	--	--
CSS0000281	1	0.90945	3.49326e-19	1.41424e-17	Calnexin like	--	GO:0005509,GO:0005789,GO:0006457,GO:0016021,GO:0030246,GO:0051082	calcium ion binding|endoplasmic reticulum membrane|protein folding|integral component of membrane|carbohydrate binding|unfolded protein binding	ko04141,ko04145	Protein processing in endoplasmic reticulum|Phagosome
CSS0031275	1	0.944317	3.10566e-05	0.000417323	probable beta-1,4-xylosyltransferase IRX10L	--	--	--	--	--
CSS0036034	2	0.942113	0.000409296	0.00454399	Glycine--tRNA ligase	--	GO:0004820,GO:0005524,GO:0005737,GO:0005739,GO:0005768,GO:0005794,GO:0005802,GO:0005829,GO:0006426,GO:0015966,GO:0046686,GO:0046983,GO:0070150	glycine-tRNA ligase activity|ATP binding|cytoplasm|mitochondrion|endosome|Golgi apparatus|trans-Golgi network|cytosol|glycyl-tRNA aminoacylation|diadenosine tetraphosphate biosynthetic process|response to cadmium ion|protein dimerization activity|mitochondrial glycyl-tRNA aminoacylation	ko00970	Aminoacyl-tRNA biosynthesis
CSS0042766	2	1.03178	4.07446e-05	0.000538483	Acyl carrier protein (ACP)	--	GO:0006633,GO:0009507,GO:0031177	fatty acid biosynthetic process|chloroplast|phosphopantetheine binding	--	--
CSS0035333	2	0.861605	0.000174281	0.00206364	Pyruvate dehydrogenase E1 component subunit beta-1 like	--	GO:0004739,GO:0005759,GO:0006086,GO:0006096	pyruvate dehydrogenase (acetyl-transferring) activity|mitochondrial matrix|acetyl-CoA biosynthetic process from pyruvate|glycolytic process	ko00010,ko00020,ko00620	Glycolysis / Gluconeogenesis|Citrate cycle (TCA cycle)|Pyruvate metabolism
CSS0016654	2	0.736435	1.9796e-05	0.000275005	Protein like	--	GO:0005783,GO:0005794,GO:0005886,GO:0006612,GO:0016021,GO:0018230,GO:0019706	endoplasmic reticulum|Golgi apparatus|plasma membrane|protein targeting to membrane|integral component of membrane|peptidyl-L-cysteine S-palmitoylation|protein-cysteine S-palmitoyltransferase activity	--	--
CSS0038740	2	0.931442	0.000792821	0.00826264	RNA pseudouridine synthase	--	GO:0001522,GO:0003723,GO:0009982	pseudouridine synthesis|RNA binding|pseudouridine synthase activity	--	--
CSS0007487	1	0.932404	0.000585803	0.00628534	PREDICTED: protein MICRORCHIDIA 7	--	GO:0003677,GO:0003723,GO:0004519,GO:0005524,GO:0005634,GO:0005654,GO:0006281,GO:0006282,GO:0006325,GO:0006952,GO:0016301,GO:0016604,GO:0016887,GO:0031047,GO:0031935,GO:0043621,GO:0044030,GO:1902290	DNA binding|RNA binding|endonuclease activity|ATP binding|nucleus|nucleoplasm|DNA repair|regulation of DNA repair|chromatin organization|defense response|kinase activity|nuclear body|ATPase activity|gene silencing by RNA|regulation of chromatin silencing|protein self-association|regulation of DNA methylation|positive regulation of defense response to oomycetes	--	--
CSS0024513	2	1.0817	0.000735877	0.00771373	Inactive purple acid phosphatase	--	GO:0003993,GO:0005576,GO:0046872	acid phosphatase activity|extracellular region|metal ion binding	--	--
CSS0007781	2	2.05359	1.62579e-09	3.59961e-08	von Willebrand factor, type A	--	GO:0005886,GO:0009630,GO:0016567,GO:0046872,GO:0048364,GO:0061630	plasma membrane|gravitropism|protein ubiquitination|metal ion binding|root development|ubiquitin protein ligase activity	--	--
CSS0018147	1	1.4308	6.48461e-13	1.86474e-11	von Willebrand factor, type A	--	GO:0005886,GO:0009630,GO:0016567,GO:0046872,GO:0048364,GO:0061630	plasma membrane|gravitropism|protein ubiquitination|metal ion binding|root development|ubiquitin protein ligase activity	--	--
CSS0000294	2	0.88378	5.81367e-11	1.43777e-09	Mitochondrial pyruvate carrier like	--	GO:0005739,GO:0005774,GO:0005886,GO:0006850,GO:0010119,GO:0016020,GO:0031305,GO:0050833	mitochondrion|vacuolar membrane|plasma membrane|mitochondrial pyruvate transmembrane transport|regulation of stomatal movement|membrane|integral component of mitochondrial inner membrane|pyruvate transmembrane transporter activity	--	--
CSS0050274	2	0.619964	3.66497e-219	2.89332e-216	Glyceraldehyde-3-phosphate dehydrogenase	--	GO:0004365,GO:0005829,GO:0006006,GO:0006096,GO:0050661,GO:0051287	glyceraldehyde-3-phosphate dehydrogenase (NAD+) (phosphorylating) activity|cytosol|glucose metabolic process|glycolytic process|NADP binding|NAD binding	ko00010,ko00710	Glycolysis / Gluconeogenesis|Carbon fixation in photosynthetic organisms
CSS0037650	1	0.950546	3.03039e-06	4.71254e-05	PREDICTED: telomere length regulation protein TEL2 homolog isoform X1	--	GO:0004722,GO:0046872	protein serine/threonine phosphatase activity|metal ion binding	--	--
CSS0000374	1	0.999447	6.05327e-06	9.06198e-05	Ferric reduction oxidase	--	GO:0000293,GO:0005739,GO:0005886,GO:0006811,GO:0016021,GO:0031966,GO:0046872	ferric-chelate reductase activity|mitochondrion|plasma membrane|ion transport|integral component of membrane|mitochondrial membrane|metal ion binding	--	--
CSS0047807	2	0.630126	2.40438e-78	4.78273e-76	Glutaredoxin-C1 like	--	GO:0004362,GO:0005737,GO:0009055,GO:0015035,GO:0034599,GO:0045454	glutathione-disulfide reductase activity|cytoplasm|electron transfer activity|protein disulfide oxidoreductase activity|cellular response to oxidative stress|cell redox homeostasis	--	--
CSS0037129	2	1.23933	1.51755e-09	3.36587e-08	Protein-L-isoaspartate O-methyltransferase	--	GO:0004719,GO:0005737,GO:0005829,GO:0007568,GO:0009651,GO:0009737,GO:0009845,GO:0030091	protein-L-isoaspartate (D-aspartate) O-methyltransferase activity|cytoplasm|cytosol|aging|response to salt stress|response to abscisic acid|seed germination|protein repair	--	--
CSS0014566	2	0.959014	7.60667e-09	1.57834e-07	hypothetical protein SETIT_2G051100v2	--	--	--	ko03040	Spliceosome
CSS0025053	1	0.931615	0.00072441	0.00760616	phosphoenolpyruvate/phosphate translocator, partial	--	GO:0008643,GO:0009670,GO:0015121,GO:0015714,GO:0016021,GO:0031969,GO:0035436	carbohydrate transport|triose-phosphate:phosphate antiporter activity|phosphoenolpyruvate:phosphate antiporter activity|phosphoenolpyruvate transport|integral component of membrane|chloroplast membrane|triose phosphate transmembrane transport	--	--
CSS0017926	2	0.925921	0.000493127	0.00539174	Inactive poly	--	GO:0003950,GO:0005739,GO:0007275,GO:0009651,GO:0016363,GO:0072593	NAD+ ADP-ribosyltransferase activity|mitochondrion|multicellular organism development|response to salt stress|nuclear matrix|reactive oxygen species metabolic process	--	--
CSS0045852	2	1.0611	2.55733e-19	1.04096e-17	1-deoxy-d-xylulose 5-phosphate reductoisomerase	--	GO:0009507,GO:0019288,GO:0030604,GO:0046872,GO:0070402	chloroplast|isopentenyl diphosphate biosynthetic process, methylerythritol 4-phosphate pathway|1-deoxy-D-xylulose-5-phosphate reductoisomerase activity|metal ion binding|NADPH binding	ko00900	Terpenoid backbone biosynthesis
CSS0020869	2	0.999902	7.3453e-05	0.000930361	WAT1-related protein	--	GO:0005886,GO:0016021,GO:0022857	plasma membrane|integral component of membrane|transmembrane transporter activity	--	--
CSS0042271	2	2.25204	1.14781e-11	3.0017e-10	uncharacterized protein LOC111290698	--	--	--	--	--
CSS0008308	2	0.873607	7.57305e-09	1.57202e-07	hypothetical protein MANES_14G069400	LIM	GO:0003729,GO:0005737,GO:0005856,GO:0005886,GO:0046872,GO:0051015,GO:0051017	mRNA binding|cytoplasm|cytoskeleton|plasma membrane|metal ion binding|actin filament binding|actin filament bundle assembly	--	--
CSS0038581	2	0.987004	3.1019e-09	6.69187e-08	Succinate dehydrogenase subunit 7B like	--	GO:0005739,GO:0005749,GO:0006099,GO:0043495,GO:0045273	mitochondrion|mitochondrial respiratory chain complex II, succinate dehydrogenase complex (ubiquinone)|tricarboxylic acid cycle|protein membrane anchor|respiratory chain complex II	--	--
CSS0009606	1	1.07206	9.24893e-06	0.000134437	germin-like protein subfamily T member 2	--	GO:0005618,GO:0030145,GO:0045735,GO:0048046	cell wall|manganese ion binding|nutrient reservoir activity|apoplast	--	--
CSS0037897	2	1.06344	1.29134e-13	3.87441e-12	Transcription factor MYB1R1 like	MYB-related	GO:0003677,GO:0005634,GO:0005829	DNA binding|nucleus|cytosol	--	--
CSS0043155	1	1.01635	0.000136157	0.00164538	PREDICTED: germin-like protein subfamily T member 1	--	GO:0005618,GO:0030145,GO:0045735,GO:0048046	cell wall|manganese ion binding|nutrient reservoir activity|apoplast	--	--
CSS0036571	2	0.915286	3.33292e-14	1.03884e-12	PREDICTED: uncharacterized protein LOC100262165	--	--	--	--	--
CSS0034004	2	1.18057	2.60436e-29	1.61852e-27	unnamed protein product	C2C2-Dof	GO:0003677,GO:0003700,GO:0005634,GO:0006355,GO:0009908,GO:0043565,GO:0046872	DNA binding|DNA-binding transcription factor activity|nucleus|regulation of transcription, DNA-templated|flower development|sequence-specific DNA binding|metal ion binding	--	--
CSS0010126	1	1.0279	0.000356874	0.00401047	HVA22-like protein	--	GO:0009409,GO:0009414,GO:0009737,GO:0016021,GO:0042538	response to cold|response to water deprivation|response to abscisic acid|integral component of membrane|hyperosmotic salinity response	--	--
CSS0000033	1	0.981071	0.000508129	0.00553899	F-box/kelch-repeat protein	--	GO:0005634,GO:0016567	nucleus|protein ubiquitination	--	--
CSS0001138	2	1.10837	0	0	Protein of unknown function DUF962 protein	--	GO:0005783,GO:0030176,GO:0046521	endoplasmic reticulum|integral component of endoplasmic reticulum membrane|sphingoid catabolic process	--	--
CSS0048651	2	1.20418	7.81741e-08	1.45105e-06	uncharacterized protein At5g01610	--	--	--	--	--
CSS0011182	2	1.42251	7.55166e-07	1.26173e-05	Chaperone protein like	--	GO:0005524,GO:0005634,GO:0005829,GO:0009408,GO:0009570,GO:0009644,GO:0009941,GO:0019538,GO:0042542,GO:0043335,GO:0045727	ATP binding|nucleus|cytosol|response to heat|chloroplast stroma|response to high light intensity|chloroplast envelope|protein metabolic process|response to hydrogen peroxide|protein unfolding|positive regulation of translation	--	--
CSS0042047	2	1.42091	4.18378e-13	1.21556e-11	Chaperone protein like	--	GO:0005524,GO:0005634,GO:0005829,GO:0009408,GO:0009570,GO:0009644,GO:0009941,GO:0019538,GO:0042542,GO:0043335,GO:0045727	ATP binding|nucleus|cytosol|response to heat|chloroplast stroma|response to high light intensity|chloroplast envelope|protein metabolic process|response to hydrogen peroxide|protein unfolding|positive regulation of translation	--	--
CSS0042233	2	0.765113	1.39304e-15	4.68286e-14	40S ribosomal protein S19-3-like	--	GO:0000028,GO:0003735,GO:0005773,GO:0005829,GO:0006412,GO:0022626,GO:0022627,GO:0042788	ribosomal small subunit assembly|structural constituent of ribosome|vacuole|cytosol|translation|cytosolic ribosome|cytosolic small ribosomal subunit|polysomal ribosome	ko03010	Ribosome
CSS0034679	2	0.783074	2.03076e-89	5.05439e-87	Protein SPIRAL1-like	--	GO:0010005,GO:0043622	cortical microtubule, transverse to long axis|cortical microtubule organization	--	--
CSS0019864	1	1.15625	0.000120218	0.00146786	Dirigent protein	--	GO:0048046	apoplast	--	--
CSS0015625	1	1.08556	1.55656e-06	2.50702e-05	Serine/threonine-protein kinase	--	GO:0004674,GO:0005524,GO:0005737,GO:0005773,GO:0005783,GO:0005794,GO:0006624,GO:0023052,GO:0032889	protein serine/threonine kinase activity|ATP binding|cytoplasm|vacuole|endoplasmic reticulum|Golgi apparatus|vacuolar protein processing|signaling|regulation of vacuole fusion, non-autophagic	--	--
CSS0017037	2	0.914258	2.58072e-09	5.59618e-08	H/ACA ribonucleoprotein complex subunit 2-like protein	--	GO:0000469,GO:0000470,GO:0003723,GO:0005730,GO:0005732,GO:0006412,GO:0031118,GO:0031120,GO:0031429,GO:0034513	cleavage involved in rRNA processing|maturation of LSU-rRNA|RNA binding|nucleolus|small nucleolar ribonucleoprotein complex|translation|rRNA pseudouridine synthesis|snRNA pseudouridine synthesis|box H/ACA snoRNP complex|box H/ACA snoRNA binding	ko03008	Ribosome biogenesis in eukaryotes
CSS0019389	2	0.942278	0.000366621	0.0041063	Plant cysteine oxidase	--	GO:0005634,GO:0005737,GO:0017172,GO:0046872	nucleus|cytoplasm|cysteine dioxygenase activity|metal ion binding	--	--
CSS0025329	2	0.854167	1.2637e-09	2.81892e-08	Protein CHAPERONE-LIKE PROTEIN OF like	--	GO:0006457,GO:0009535,GO:0009658,GO:0009704,GO:0009941,GO:0016021,GO:0044183,GO:0055035,GO:0061077	protein folding|chloroplast thylakoid membrane|chloroplast organization|de-etiolation|chloroplast envelope|integral component of membrane|protein binding involved in protein folding|plastid thylakoid membrane|chaperone-mediated protein folding	--	--
CSS0029845	2	0.859287	2.68103e-06	4.19507e-05	Protein Dr1 like	NF-YB	GO:0003700,GO:0005634,GO:0006355,GO:0046982	DNA-binding transcription factor activity|nucleus|regulation of transcription, DNA-templated|protein heterodimerization activity	--	--
CSS0028644	2	0.951815	1.64441e-05	0.000230661	Protein CHAPERONE-LIKE PROTEIN OF like	--	GO:0006457,GO:0009535,GO:0009658,GO:0009704,GO:0009941,GO:0016021,GO:0044183,GO:0055035,GO:0061077	protein folding|chloroplast thylakoid membrane|chloroplast organization|de-etiolation|chloroplast envelope|integral component of membrane|protein binding involved in protein folding|plastid thylakoid membrane|chaperone-mediated protein folding	--	--
CSS0009272	2	0.935625	8.58866e-23	4.09766e-21	ATP-dependent Clp protease adapter protein	--	GO:0005840,GO:0008233,GO:0009570,GO:0030163,GO:0030674,GO:1903052	ribosome|peptidase activity|chloroplast stroma|protein catabolic process|protein binding, bridging|positive regulation of proteolysis involved in cellular protein catabolic process	--	--
CSS0025722	1	0.954402	0.000560915	0.00604527	Protein CASP like	--	GO:0000139,GO:0005768,GO:0005794,GO:0005802,GO:0006891,GO:0016021,GO:0030173,GO:0048193	Golgi membrane|endosome|Golgi apparatus|trans-Golgi network|intra-Golgi vesicle-mediated transport|integral component of membrane|integral component of Golgi membrane|Golgi vesicle transport	--	--
CSS0040786	1	1.06867	2.6763e-27	1.53659e-25	Cytochrome P450 CYP736A12 like	--	GO:0004497,GO:0005506,GO:0016021,GO:0016705,GO:0020037	monooxygenase activity|iron ion binding|integral component of membrane|oxidoreductase activity, acting on paired donors, with incorporation or reduction of molecular oxygen|heme binding	--	--
CSS0028739	2	0.867252	0.00023885	0.00275964	50S ribosomal protein like	--	GO:0003735,GO:0005739,GO:0005840,GO:0006412,GO:0009507,GO:0019843	structural constituent of ribosome|mitochondrion|ribosome|translation|chloroplast|rRNA binding	ko03010	Ribosome
CSS0036135	1	0.949002	0.000700421	0.00737881	Ribonuclease	--	--	--	--	--
CSS0008828	1	0.958259	3.25216e-21	1.44263e-19	LEAF RUST 10 DISEASE-RESISTANCE LOCUS RECEPTOR-LIKE PROTEIN KINASE-like 1.2 isoform X1	--	--	--	--	--
CSS0015266	2	2.6842	1.39917e-84	3.1701e-82	Non-specific lipid-transfer protein	--	GO:0006869,GO:0008289	lipid transport|lipid binding	--	--
CSS0015639	2	2.14273	4.91073e-22	2.26176e-20	Non-specific lipid-transfer protein	--	GO:0006869,GO:0008289	lipid transport|lipid binding	--	--
CSS0047130	2	7.12366	7.62528e-71	1.35658e-68	kunitz trypsin inhibitor 2-like	--	--	--	--	--
CSS0023887	2	0.858945	6.9025e-09	1.43814e-07	uncharacterized protein LOC111372327	--	GO:0000786,GO:0003677,GO:0003690,GO:0005634,GO:0005730,GO:0006334,GO:0006355,GO:0016584,GO:0030261,GO:0031492,GO:0031936,GO:0045910	nucleosome|DNA binding|double-stranded DNA binding|nucleus|nucleolus|nucleosome assembly|regulation of transcription, DNA-templated|nucleosome positioning|chromosome condensation|nucleosomal DNA binding|negative regulation of chromatin silencing|negative regulation of DNA recombination	--	--
CSS0048248	1	0.891445	7.83378e-11	1.91857e-09	ERAD-associated E3 ubiquitin-protein ligase component HRD3A like	--	GO:0005783,GO:0005789,GO:0016020,GO:0016021,GO:0030433,GO:0042538	endoplasmic reticulum|endoplasmic reticulum membrane|membrane|integral component of membrane|ubiquitin-dependent ERAD pathway|hyperosmotic salinity response	ko04141	Protein processing in endoplasmic reticulum
CSS0013925	2	0.784159	3.56412e-18	1.38096e-16	LOW QUALITY PROTEIN: uncharacterized protein LOC111993890	--	GO:0004332,GO:0006096,GO:0008270	fructose-bisphosphate aldolase activity|glycolytic process|zinc ion binding	--	--
CSS0030737	2	1.15033	5.26932e-18	2.02767e-16	nudix hydrolase 18, mitochondrial-like	--	GO:0005634,GO:0005737,GO:0005739,GO:0016787,GO:0046872	nucleus|cytoplasm|mitochondrion|hydrolase activity|metal ion binding	--	--
CSS0046956	2	0.994134	3.52591e-09	7.55179e-08	Signal peptide, CUB and EGF-like domain-containing protein	--	--	--	--	--
CSS0002924	2	0.893516	2.93683e-07	5.13082e-06	RNA polymerase II subunit A C-terminal domain phosphatase	--	GO:0004721,GO:0005634,GO:0005829,GO:0005847,GO:0006352,GO:0006369,GO:0006378,GO:0008420,GO:0023052,GO:0070940,GO:1905213	phosphoprotein phosphatase activity|nucleus|cytosol|mRNA cleavage and polyadenylation specificity factor complex|DNA-templated transcription, initiation|termination of RNA polymerase II transcription|mRNA polyadenylation|RNA polymerase II CTD heptapeptide repeat phosphatase activity|signaling|dephosphorylation of RNA polymerase II C-terminal domain|negative regulation of mitotic chromosome conden…	ko03015	mRNA surveillance pathway
CSS0005586	1	0.791538	1.46123e-33	1.06998e-31	Annexin like	--	GO:0005509,GO:0005543,GO:0005544,GO:0009408,GO:0009409,GO:0009414,GO:0009555,GO:0009639,GO:0009651,GO:0009846,GO:0009860,GO:0051015	calcium ion binding|phospholipid binding|calcium-dependent phospholipid binding|response to heat|response to cold|response to water deprivation|pollen development|response to red or far red light|response to salt stress|pollen germination|pollen tube growth|actin filament binding	--	--
CSS0034346	2	0.998027	0.000249876	0.00287781	Zinc finger protein MAGPIE	C2H2	GO:0003700,GO:0005634,GO:0006355,GO:0009630,GO:0009965,GO:0010601,GO:0043621,GO:0044212,GO:0046872,GO:0046982,GO:0048444,GO:2000012,GO:2000904	DNA-binding transcription factor activity|nucleus|regulation of transcription, DNA-templated|gravitropism|leaf morphogenesis|positive regulation of auxin biosynthetic process|protein self-association|transcription regulatory region DNA binding|metal ion binding|protein heterodimerization activity|floral organ morphogenesis|regulation of auxin polar transport|regulation of starch metabolic process	--	--
CSS0041934	1	0.949892	0.000284133	0.00324866	putative cyclic nucleotide-gated ion channel 20, chloroplastic	--	GO:0005216,GO:0005516,GO:0009535,GO:0009624,GO:0016021,GO:0030552,GO:0030553	ion channel activity|calmodulin binding|chloroplast thylakoid membrane|response to nematode|integral component of membrane|cAMP binding|cGMP binding	ko04626	Plant-pathogen interaction
CSS0038631	2	0.767324	5.78599e-10	1.33487e-08	Phytochrome-associated serine/threonine-protein phosphatase 3	--	GO:0000159,GO:0004674,GO:0004721,GO:0005634,GO:0005737,GO:0006470,GO:0009910,GO:0046872	protein phosphatase type 2A complex|protein serine/threonine kinase activity|phosphoprotein phosphatase activity|nucleus|cytoplasm|protein dephosphorylation|negative regulation of flower development|metal ion binding	--	--
CSS0032824	2	1.00674	9.35409e-08	1.72299e-06	UPF0426 protein	--	GO:0010287	plastoglobule	--	--
CSS0021839	1	0.904851	0.00022821	0.00264275	DNA-directed RNA polymerase alpha subunit (plastid)	--	GO:0003677,GO:0003899,GO:0006351,GO:0009507,GO:0046983	DNA binding|DNA-directed 5'-3' RNA polymerase activity|transcription, DNA-templated|chloroplast|protein dimerization activity	ko03020	RNA polymerase
CSS0034415	2	1.01313	5.55055e-05	0.00071816	Syntaxin-22 like	--	GO:0000149,GO:0000325,GO:0005484,GO:0005773,GO:0006886,GO:0006906,GO:0009660,GO:0009705,GO:0009959,GO:0010118,GO:0012505,GO:0016021,GO:0031201,GO:0031902,GO:0045324,GO:0048278	SNARE binding|plant-type vacuole|SNAP receptor activity|vacuole|intracellular protein transport|vesicle fusion|amyloplast organization|plant-type vacuole membrane|negative gravitropism|stomatal movement|endomembrane system|integral component of membrane|SNARE complex|late endosome membrane|late endosome to vacuole transport|vesicle docking	--	--
CSS0015772	2	0.805513	2.47659e-07	4.37059e-06	Phosphoribosyl-ATP pyrophosphatase	--	GO:0000105,GO:0004635,GO:0004636,GO:0005524,GO:0009507,GO:0009570	histidine biosynthetic process|phosphoribosyl-AMP cyclohydrolase activity|phosphoribosyl-ATP diphosphatase activity|ATP binding|chloroplast|chloroplast stroma	ko00340	Histidine metabolism
CSS0003642	2	0.764266	1.26745e-16	4.53526e-15	hypothetical protein JCGZ_26820	--	GO:0005886	plasma membrane	--	--
CSS0017476	2	0.838728	4.86755e-14	1.49231e-12	60S ribosomal protein like	--	GO:0000470,GO:0003723,GO:0006412,GO:0022625	maturation of LSU-rRNA|RNA binding|translation|cytosolic large ribosomal subunit	ko03010	Ribosome
CSS0038475	2	0.921795	6.23656e-07	1.05209e-05	PREDICTED: uncharacterized protein LOC105964462	--	--	--	--	--
CSS0041226	2	0.865002	1.5069e-12	4.22745e-11	uncharacterized protein LOC18784392	--	GO:0005789,GO:0006605,GO:0015450,GO:0016021	endoplasmic reticulum membrane|protein targeting|P-P-bond-hydrolysis-driven protein transmembrane transporter activity|integral component of membrane	ko03060,ko04141,ko04145	Protein export|Protein processing in endoplasmic reticulum|Phagosome
CSS0036607	2	0.925864	5.38993e-14	1.64547e-12	hypothetical protein CCACVL1_10231	--	--	--	--	--
CSS0036982	2	0.893835	0.000296305	0.00337409	30S ribosomal protein S21, chloroplastic	--	GO:0003735,GO:0005840,GO:0006412,GO:0009507,GO:0019843	structural constituent of ribosome|ribosome|translation|chloroplast|rRNA binding	--	--
CSS0020364	2	0.925946	9.95582e-06	0.000144049	hypothetical protein CEY00_Acc30539	--	GO:0005886	plasma membrane	--	--
CSS0006177	2	0.799836	7.14396e-06	0.000105726	Succinate dehydrogenase	--	GO:0000104,GO:0005739,GO:0005749,GO:0006099,GO:0006121,GO:0008177,GO:0008270,GO:0009055,GO:0009060,GO:0022904,GO:0045273,GO:0045281,GO:0051537,GO:0051538,GO:0051539	succinate dehydrogenase activity|mitochondrion|mitochondrial respiratory chain complex II, succinate dehydrogenase complex (ubiquinone)|tricarboxylic acid cycle|mitochondrial electron transport, succinate to ubiquinone|succinate dehydrogenase (ubiquinone) activity|zinc ion binding|electron transfer activity|aerobic respiration|respiratory electron transport chain|respiratory chain complex II|succ…	ko00020,ko00190	Citrate cycle (TCA cycle)|Oxidative phosphorylation
CSS0005098	2	0.898114	8.09021e-14	2.45206e-12	Plant UBX domain-containing protein	--	GO:0005737,GO:0032984,GO:0035265,GO:0051117	cytoplasm|protein-containing complex disassembly|organ growth|ATPase binding	--	--
CSS0032529	1	1.95723	2.48799e-55	3.19861e-53	Lysine histidine transporter like	--	GO:0003333,GO:0005886,GO:0015171,GO:0015293,GO:0016021,GO:0043090,GO:0080167	amino acid transmembrane transport|plasma membrane|amino acid transmembrane transporter activity|symporter activity|integral component of membrane|amino acid import|response to karrikin	--	--
CSS0012823	2	0.678794	4.59062e-28	2.70643e-26	Succinate dehydrogenase	--	GO:0000104,GO:0005739,GO:0005749,GO:0006099,GO:0006121,GO:0008177,GO:0008270,GO:0009055,GO:0009060,GO:0022904,GO:0045273,GO:0045281,GO:0051537,GO:0051538,GO:0051539	succinate dehydrogenase activity|mitochondrion|mitochondrial respiratory chain complex II, succinate dehydrogenase complex (ubiquinone)|tricarboxylic acid cycle|mitochondrial electron transport, succinate to ubiquinone|succinate dehydrogenase (ubiquinone) activity|zinc ion binding|electron transfer activity|aerobic respiration|respiratory electron transport chain|respiratory chain complex II|succ…	ko00020,ko00190	Citrate cycle (TCA cycle)|Oxidative phosphorylation
CSS0015220	2	0.817961	1.69691e-05	0.000237562	Pre-rRNA-processing protein like	--	GO:0000447,GO:0000472,GO:0000480,GO:0003723,GO:0005634,GO:0005730,GO:0006364,GO:0034462	endonucleolytic cleavage in ITS1 to separate SSU-rRNA from 5.8S rRNA and LSU-rRNA from tricistronic rRNA transcript (SSU-rRNA, 5.8S rRNA, LSU-rRNA)|endonucleolytic cleavage to generate mature 5'-end of SSU-rRNA from (SSU-rRNA, 5.8S rRNA, LSU-rRNA)|endonucleolytic cleavage in 5'-ETS of tricistronic rRNA transcript (SSU-rRNA, 5.8S rRNA, LSU-rRNA)|RNA binding|nucleus|nucleolus|rRNA processing|small-…	--	--
CSS0038869	2	0.848008	4.05675e-08	7.79936e-07	Surfeit locus protein like	--	--	--	--	--
CSS0047288	1	0.968513	1.67484e-08	3.35533e-07	Beta-1,4-mannosyl-glycoprotein like	--	--	--	ko00510	N-Glycan biosynthesis
CSS0002578	2	1.50898	2.68996e-11	6.82965e-10	Futsch light chain LC(f) like	--	--	--	--	--
CSS0028171	2	0.703957	1.10093e-11	2.88209e-10	ADP-ribosylation factor 2 isoform X1	--	GO:0005525,GO:0005737,GO:0005794,GO:0006886,GO:0016192	GTP binding|cytoplasm|Golgi apparatus|intracellular protein transport|vesicle-mediated transport	ko04144	Endocytosis
CSS0004448	2	0.809429	1.78024e-78	3.55521e-76	putative universal stress protein	--	GO:0005886,GO:0016208	plasma membrane|AMP binding	--	--
CSS0005826	2	0.859046	1.79464e-06	2.86763e-05	ADP-ribosylation factor 2 isoform X1	--	GO:0005525,GO:0005737,GO:0005794,GO:0006886,GO:0016192	GTP binding|cytoplasm|Golgi apparatus|intracellular protein transport|vesicle-mediated transport	ko04144	Endocytosis
CSS0012888	2	0.804663	1.3006e-54	1.63465e-52	Glutaredoxin like	--	GO:0004362,GO:0005737,GO:0009055,GO:0015035,GO:0034599,GO:0045454	glutathione-disulfide reductase activity|cytoplasm|electron transfer activity|protein disulfide oxidoreductase activity|cellular response to oxidative stress|cell redox homeostasis	--	--
CSS0009162	2	1.01643	0.000869552	0.00897714	PREDICTED: aldehyde dehydrogenase family 2 member B7, mitochondrial-like	--	GO:0004029,GO:0005759,GO:0043878	aldehyde dehydrogenase (NAD) activity|mitochondrial matrix|glyceraldehyde-3-phosphate dehydrogenase (NAD+) (non-phosphorylating) activity	ko00010,ko00053,ko00071,ko00280,ko00310,ko00330,ko00340,ko00380,ko00410,ko00561,ko00620,ko00903	Glycolysis / Gluconeogenesis|Ascorbate and aldarate metabolism|Fatty acid degradation|Valine, leucine and isoleucine degradation|Lysine degradation|Arginine and proline metabolism|Histidine metabolism|Tryptophan metabolism|beta-Alanine metabolism|Glycerolipid metabolism|Pyruvate metabolism|Limonene and pinene degradation
CSS0043491	2	0.9445	0.000226438	0.00262403	PREDICTED: uncharacterized protein LOC107798671 isoform X1	--	GO:0003676,GO:0004523,GO:0046872	nucleic acid binding|RNA-DNA hybrid ribonuclease activity|metal ion binding	--	--
CSS0048749	2	0.923543	7.14369e-07	1.19515e-05	Ferredoxin-thioredoxin reductase catalytic chain like	--	GO:0009055,GO:0009507,GO:0030385,GO:0046872,GO:0051539,GO:0055114,GO:0103012	electron transfer activity|chloroplast|ferredoxin:thioredoxin reductase activity|metal ion binding|4 iron, 4 sulfur cluster binding|oxidation-reduction process|ferredoxin-thioredoxin reductase activity	--	--
CSS0005150	2	0.740791	2.97946e-12	8.15036e-11	Protein transport protein SEC13 B like	--	GO:0000139,GO:0005198,GO:0005635,GO:0005643,GO:0005654,GO:0005730,GO:0005783,GO:0015031,GO:0030127,GO:0030433,GO:0031080,GO:0031081,GO:0042802,GO:0043547,GO:0045893,GO:0051028,GO:0061700,GO:0090110,GO:0090114,GO:1904263	Golgi membrane|structural molecule activity|nuclear envelope|nuclear pore|nucleoplasm|nucleolus|endoplasmic reticulum|protein transport|COPII vesicle coat|ubiquitin-dependent ERAD pathway|nuclear pore outer ring|nuclear pore distribution|identical protein binding|positive regulation of GTPase activity|positive regulation of transcription, DNA-templated|mRNA transport|GATOR2 complex|cargo loading …	ko03013,ko04141	RNA transport|Protein processing in endoplasmic reticulum
CSS0016092	1	0.894739	4.68787e-06	7.09996e-05	Paired amphipathic helix protein Sin3-like	--	GO:0000122,GO:0000785,GO:0003714,GO:0005634,GO:0005829,GO:0016575	negative regulation of transcription by RNA polymerase II|chromatin|transcription corepressor activity|nucleus|cytosol|histone deacetylation	--	--
CSS0000459	2	0.706147	5.04386e-75	9.68977e-73	Thioredoxin like	--	GO:0005739,GO:0005829,GO:0005886,GO:0006662,GO:0015035,GO:0016671,GO:0045454	mitochondrion|cytosol|plasma membrane|glycerol ether metabolic process|protein disulfide oxidoreductase activity|oxidoreductase activity, acting on a sulfur group of donors, disulfide as acceptor|cell redox homeostasis	--	--
CSS0041610	2	0.910584	0.000576299	0.00620182	Vacuolar protein sorting-associated protein	--	GO:0001881,GO:0005768,GO:0005771,GO:0005794,GO:0005829,GO:0006623,GO:0006886,GO:0007034,GO:0016020,GO:0030904,GO:0031902,GO:0042147,GO:0043231	receptor recycling|endosome|multivesicular body|Golgi apparatus|cytosol|protein targeting to vacuole|intracellular protein transport|vacuolar transport|membrane|retromer complex|late endosome membrane|retrograde transport, endosome to Golgi|intracellular membrane-bounded organelle	ko04144	Endocytosis
CSS0018558	1	0.858202	0.000147582	0.00177031	5'-adenylylsulfate reductase-like	--	GO:0005623,GO:0016021,GO:0045454	cell|integral component of membrane|cell redox homeostasis	--	--
CSS0046612	2	0.613679	2.43087e-84	5.48303e-82	Hypersensitive-induced response protein	--	GO:0005773,GO:0005774,GO:0005886,GO:0009506,GO:0009507,GO:0043424	vacuole|vacuolar membrane|plasma membrane|plasmodesma|chloroplast|protein histidine kinase binding	--	--
CSS0006175	2	0.907528	0.000361106	0.00405081	Plant cysteine oxidase	--	GO:0001666,GO:0005634,GO:0005829,GO:0017172,GO:0018171,GO:0046872,GO:0070483	response to hypoxia|nucleus|cytosol|cysteine dioxygenase activity|peptidyl-cysteine oxidation|metal ion binding|detection of hypoxia	--	--
CSS0017870	2	0.909428	2.44474e-09	5.315e-08	Binding partner of like	--	GO:0003723,GO:0005737,GO:0009735,GO:0016020	RNA binding|cytoplasm|response to cytokinin|membrane	--	--
CSS0043389	2	0.880465	3.97721e-06	6.08936e-05	60S ribosomal protein	--	GO:0003735,GO:0005840,GO:0006412	structural constituent of ribosome|ribosome|translation	ko03010	Ribosome
CSS0048636	1	0.943054	0.000148997	0.00178645	FAR1 DNA binding domain	--	GO:0003700,GO:0005634,GO:0008270,GO:0009639,GO:0010017,GO:0010018,GO:0010218,GO:0042753,GO:0045893	DNA-binding transcription factor activity|nucleus|zinc ion binding|response to red or far red light|red or far-red light signaling pathway|far-red light signaling pathway|response to far red light|positive regulation of circadian rhythm|positive regulation of transcription, DNA-templated	--	--
CSS0013635	1	0.987643	8.13686e-06	0.000119371	Ribosomal protein L34Ae protein	--	GO:0003735,GO:0005840,GO:0006412,GO:0016021	structural constituent of ribosome|ribosome|translation|integral component of membrane	--	--
CSS0029813	1	1.50048	0	0	calmodulin-like protein 45	--	GO:0005509	calcium ion binding	ko04016,ko04070,ko04626	MAPK signaling pathway - plant|Phosphatidylinositol signaling system|Plant-pathogen interaction
CSS0008500	2	1.04871	4.19201e-06	6.39111e-05	hypothetical protein B456_006G014000	--	GO:0005618,GO:0030599,GO:0042545,GO:0045330,GO:0045488,GO:0045490,GO:0050829	cell wall|pectinesterase activity|cell wall modification|aspartyl esterase activity|pectin metabolic process|pectin catabolic process|defense response to Gram-negative bacterium	ko00040	Pentose and glucuronate interconversions
CSS0050227	2	0.680092	1.32399e-15	4.46559e-14	Vesicle transport v-SNARE like	--	GO:0000149,GO:0005484,GO:0005789,GO:0005794,GO:0005829,GO:0006623,GO:0006888,GO:0006891,GO:0006896,GO:0012507,GO:0016021,GO:0031201,GO:0031902,GO:0042147,GO:0048280	SNARE binding|SNAP receptor activity|endoplasmic reticulum membrane|Golgi apparatus|cytosol|protein targeting to vacuole|ER to Golgi vesicle-mediated transport|intra-Golgi vesicle-mediated transport|Golgi to vacuole transport|ER to Golgi transport vesicle membrane|integral component of membrane|SNARE complex|late endosome membrane|retrograde transport, endosome to Golgi|vesicle fusion with Golgi …	--	--
CSS0029046	2	0.699727	7.37765e-12	1.9557e-10	proteasome subunit alpha type-2-A	--	GO:0000502,GO:0004175,GO:0004298,GO:0005634,GO:0005737,GO:0005829,GO:0005839,GO:0010498,GO:0010499,GO:0019773,GO:0042742,GO:0043161	proteasome complex|endopeptidase activity|threonine-type endopeptidase activity|nucleus|cytoplasm|cytosol|proteasome core complex|proteasomal protein catabolic process|proteasomal ubiquitin-independent protein catabolic process|proteasome core complex, alpha-subunit complex|defense response to bacterium|proteasome-mediated ubiquitin-dependent protein catabolic process	ko03050	Proteasome
CSS0016497	1	0.937358	3.98048e-05	0.00052689	Wall-associated receptor kinase-like	--	--	--	--	--
CSS0010497	2	1.60739	1.91752e-05	0.000266673	Serine carboxypeptidase-like	--	GO:0004185,GO:0005615,GO:0009742,GO:0051603	serine-type carboxypeptidase activity|extracellular space|brassinosteroid mediated signaling pathway|proteolysis involved in cellular protein catabolic process	--	--
CSS0012139	1	1.23876	9.34717e-06	0.000135708	Protein CHLORORESPIRATORY REDUCTION 7 like	--	GO:0009507,GO:0009570,GO:0010275,GO:0010598,GO:0016020	chloroplast|chloroplast stroma|NAD(P)H dehydrogenase complex assembly|NAD(P)H dehydrogenase complex (plastoquinone)|membrane	--	--
CSS0045575	1	0.996813	6.11779e-05	0.000787319	LRR receptor-like serine/threonine-protein kinase	--	--	--	--	--
CSS0002198	2	0.941713	1.32479e-07	2.40515e-06	Villin-1 like	--	--	--	--	--
CSS0017666	2	0.925822	3.62903e-05	0.000482899	Protein of unknown function DUF2039 protein	--	--	--	--	--
CSS0024904	2	0.874078	2.1201e-11	5.42918e-10	Thioredoxin-like fold protein	--	--	--	--	--
CSS0008487	2	0.809488	1.8091e-17	6.78076e-16	E3 ubiquitin-protein like	--	GO:0004842,GO:0005737,GO:0008270	ubiquitin-protein transferase activity|cytoplasm|zinc ion binding	--	--
CSS0037173	2	0.899063	1.71804e-25	9.21484e-24	U3 small nucleolar ribonucleoprotein	--	GO:0005654,GO:0006364,GO:0019843,GO:0030515,GO:0031167,GO:0032040,GO:0034457,GO:0042274	nucleoplasm|rRNA processing|rRNA binding|snoRNA binding|rRNA methylation|small-subunit processome|Mpp10 complex|ribosomal small subunit biogenesis	ko03008	Ribosome biogenesis in eukaryotes
CSS0014870	1	0.770111	1.05028e-29	6.6665e-28	sodium-coupled neutral amino acid transporter 3	--	GO:0003333,GO:0005773,GO:0005774,GO:0015171,GO:0016021	amino acid transmembrane transport|vacuole|vacuolar membrane|amino acid transmembrane transporter activity|integral component of membrane	--	--
CSS0034394	2	0.87907	0.000481675	0.00528253	WPP domain-interacting tail-anchored protein	--	GO:0005635,GO:0016021,GO:0031965	nuclear envelope|integral component of membrane|nuclear membrane	--	--
CSS0011163	2	0.97771	0.000172051	0.00203866	Coatomer subunit zeta-3 like	--	--	--	--	--
CSS0017323	2	1.29282	2.28911e-16	8.09359e-15	Glutamine dumper 2, putative	--	GO:0006865,GO:0016021,GO:0080143	amino acid transport|integral component of membrane|regulation of amino acid export	--	--
CSS0021599	2	0.852362	3.70466e-09	7.91785e-08	uncharacterized protein LOC110421670	--	--	--	--	--
CSS0049372	2	0.851005	5.24642e-05	0.000681954	Cyclin-B1-2 like	--	GO:0000079,GO:0000278,GO:0000307,GO:0005634,GO:0005737,GO:0006468,GO:0007088,GO:0008284,GO:0016538,GO:0019901,GO:0045787,GO:0051301	regulation of cyclin-dependent protein serine/threonine kinase activity|mitotic cell cycle|cyclin-dependent protein kinase holoenzyme complex|nucleus|cytoplasm|protein phosphorylation|regulation of mitotic nuclear division|positive regulation of cell proliferation|cyclin-dependent protein serine/threonine kinase regulator activity|protein kinase binding|positive regulation of cell cycle|cell divi…	ko03050	Proteasome
CSS0042088	2	0.589983	1.51601e-93	3.84906e-91	14-3-3 protein	--	GO:0019904	protein domain specific binding	--	--
CSS0014416	2	0.891296	7.86778e-05	0.000991568	40S ribosomal protein	--	GO:0003735,GO:0005840,GO:0006412	structural constituent of ribosome|ribosome|translation	ko03010	Ribosome
[truncated: 2,145 more rows]

## Sheet: Module 1_GO
Class	GO_Name	GO_ID	GO_Level	P_value	EnrichmentScore	HitsGenesCountsInSelectedSet	HitsGenesCountsInBackground	AllGenesCountsInSelectedSet	AllGenesCountsInBackground	GenesOfSelectedSetInGOterm	corrected p-value(BH method)
[truncated: 257 more rows]

## Sheet: Module 2_GO
Class	GO_Name	GO_ID	GO_Level	P_value	EnrichmentScore	HitsGenesCountsInSelectedSet	HitsGenesCountsInBackground	AllGenesCountsInSelectedSet	AllGenesCountsInBackground	GenesOfSelectedSetInGOterm	corrected p-value(BH method)
[truncated: 577 more rows]
