# Supplementary material for: Root-specific theanine metabolism and regulation at the single-cell level in tea plants (Camellia sinensis)
Source: eLife. 2024 Oct 14;13:RP95891. doi: 10.7554/eLife.95891 (PMC11473105; doi:10.7554/eLife.95891)
Supplement: Supplementary file 5. [file elife-95891-supp5.xlsx]

## Sheet: Nitrogen assimilation
		Gene expression									Cell expressed
Gene ID	Gene symbol	Cluster 1	Cluster 2	Cluster 3	Cluster 4	Cluster 5	Cluster 6	Cluster 7	Cluster 8		Cluster 1	Cluster 2	Cluster 3	Cluster 4	Cluster 5	Cluster 6	Cluster 7	Cluster 8
CSS0022328	CsAMT1.1	0	0	0	0.000925477	0	0	0	0		0	0	0	0.0614628	0	0	0	0
CSS0012236	CsAMT1.2	0.00088536	0.000960925	0	0.00538852	0	0	0.0073029	0		0.030525	0.0434783	0	0.307314	0	0	0.371747	0
CSS0001725	CsAMT3.1	0.00536216	0.00819611	0.00333379	0.00320638	0	0.0118877	0.00804134	0.00974991		0.213675	0.347826	0.184162	0.184388	0	0.604839	0.371747	0.743494
CSS0037113	CsNRT1.1	0.0011698	0	0	0.003105	0	0	0	0		0.0610501	0	0	0.184388	0	0	0	0
CSS0010471	CsNRT1.2	0	0	0	0	0	0	0	0		0	0	0	0	0	0	0	0
CSS0016218	CsNRT1.5	0.00234835	0.00537577	0.00598569	0.0146616	0.00518978	0.010443	0.0171653	0		0.0915751	0.217391	0.306937	0.860479	0.351494	0.604839	1.11524	0
CSS0041711	CsNRT1.7	0.00224935	0.00572932	0.0108141	0.0219916	0.00365409	0.00274402	0	0.00973115		0.0915751	0.26087	0.613874	1.16779	0.175747	0.201613	0	0.743494
CSS0041903	CsNRT2.4	0	0	0.00104791	0	0	0	0	0		0	0	0.0613874	0	0	0	0	0
CSS0035628	CsNRT2.5	0.00229688	0.0174656	0.00229298	0.00908301	0.0182288	0	0	0.0158916		0.0915751	0.695652	0.122775	0.676091	0.878735	0	0	0.743494
CSS0018467	CsNRT3.1	0.0751713	0.166396	0.144142	0.309872	0.0934892	0.0452312	0.101316	0.114227		3.0525	6.52174	7.12093	14.7511	4.21793	2.62097	5.20446	7.0632
CSS0034664	CsNRT3.2	0.03151	0.0732241	0.0302227	0.0959249	0.0428794	0.0506441	0.0456932	0.0314949		1.25153	3	1.71885	5.59312	2.28471	2.82258	2.60223	2.23048
CSS0009983	CsNR1	1.55475	0.496549	1.05605	0.687114	0.557393	0.896777	0.800569	1.0974		53.9988	18.913	47.0227	33.3743	24.4288	41.129	34.5725	52.4164
CSS0021018	CsNR2	0.25931	0.107811	0.22089	0.141451	0.143286	0.132911	0.2257	0.262605		11.2332	4.30435	12.2161	8.35894	6.67838	7.8629	12.2677	16.7286
CSS0017106	CsNR3	0.031424	0.00957594	0.0219728	0.0138104	0.0114793	0.0110116	0.0172226	0.0687053		1.3431	0.391304	1.28913	0.799017	0.527241	0.604839	0.743494	4.46097
CSS0006109	CsNR4	1.26116	1.04699	1.28421	1.36541	1.93552	1.10041	1.35047	1.23468		46.6422	38.3043	58.1338	61.3399	68.3656	49.3952	60.223	59.4796
CSS0044368	CsNR5	0.000808251	0.00323803	0.00271127	0.00120355	0	0	0	0		0.030525	0.130435	0.122775	0.0614628	0	0	0	0
CSS0027199	CsNiR1	0.00651995	0.0156492	0.0183155	0.0204701	0	0.0136491	0.00605424	0.0352875		0.274725	0.652174	0.982198	1.04487	0	0.604839	0.371747	2.23048
CSS0038145	CsNiR2	0.0193605	0.0137949	0.0204306	0.0435875	0.00509174	0.0241903	0.0230494	0.0586916		0.854701	0.565217	1.10497	2.58144	0.175747	1.41129	1.48699	4.08922

## Sheet: Amino acids synthesis genes
						Gene expression									Cell expressed
Pathway		Amino acid	Enzymes Name	Symbol	Gene ID	Cluster 1	Cluster 2	Cluster 3	Cluster 4	Cluster 5	Cluster 6	Cluster 7	Cluster 8		Cluster 1	Cluster 2	Cluster 3	Cluster 4	Cluster 5	Cluster 6	Cluster 7	Cluster 8
P1	Glu pathway	Glu	Glutamate dehydrogenase	GDH3	CSS0046767	0.00318736	0.00505702	0.00269648	0	0	0.00362508	0	0.0273302		0.1221	0.173913	0.184162	0	0	0.201613	0	1.85874
P1	Glu pathway	Glu	Glutamate dehydrogenase	GDH4	CSS0007238	0.159814	0.0783708	0.138452	0.143363	0.0416681	0.124833	0.0359755	0.0411899		6.92918	3.26087	7.42787	7.86724	2.28471	6.65323	1.48699	2.60223
P1	Glu pathway	Glu	Glutamate dehydrogenase	GDH	CSS0021774	0.0275016	0.0338283	0.0832764	0.0676971	0.0224173	0.0724494	0.0573267	0.0607091		1.221	1.3913	4.66544	3.93362	1.05448	4.03226	2.97398	4.08922
P1	Glu pathway	Glu	Glutamate dehydrogenase	GDH	CSS0036616	0.0201984	0.0115381	0.0364103	0.0375146	0.0184121	0.0288536	0.024134	0.0823866		0.915751	0.521739	1.9644	2.27412	0.878735	1.6129	1.48699	4.83271
P1	Glu pathway	Glu	Glutamate dehydrogenase	GDH	CSS0034454	0.992087	0.682013	0.650699	0.871424	1.02455	0.875706	0.322609	0.700363		35.7753	25.3478	29.3432	39.0904	39.3673	39.1129	15.9851	36.0595
P1	Glu pathway	Glu	Glutamate dehydrogenase	GDH2	CSS0002543	0.00919528	0.00542639	0.0187202	0.00828305	0.0104755	0.00713047	0.0264019	0.0217558		0.42735	0.217391	1.10497	0.491703	0.527241	0.403226	1.48699	1.48699
P1	Glu pathway	Glu	Glutamate synthase	GOGAT	CSS0039913	0.00246276	0.00450799	0.00512914	0.000974335	0	0.00318614	0	0.00999923		0.0915751	0.173913	0.245549	0.0614628	0	0.201613	0	0.743494
P1	Glu pathway	Glu	Glutamate synthase	GOGAT1	CSS0007758	0.593883	0.810754	1.01339	1.05344	0.389015	0.906828	0.746218	1.01676		22.3443	29.7391	46.9613	48.9859	17.3989	41.9355	34.2007	49.0706
P1	Glu pathway	Glu	Glutamate synthase	GOGAT3	CSS0044676	0.00230745	0.000937537	0	0.000885052	0	0	0	0		0.0915751	0.0434783	0	0.0614628	0	0	0	0
Glu synthesis					Total	1.81064	1.63243	1.94877	2.18358	1.50654	2.02261	1.21266	1.96049		67.9182	60.8696	91.8969	100	61.5114	94.1532	57.6208	100
P1	Glu pathway	Gln	Glutamine synthetase	GS	CSS0019711	0.229621	0.0861656	0.21726	0.207419	0.199654	0.143743	0.264554	0.246052		10.0733	3.73913	12.3389	12.2926	9.84183	7.8629	14.1264	14.8699
P1	Glu pathway	Gln	Glutamine synthetase	GS1.1	CSS0037306	0.0305637	0.0330743	0.0102913	0.0459201	0.0699477	0.0142572	0.0378551	0.0967981		1.28205	1.34783	0.552486	2.70436	3.33919	0.806452	2.23048	5.57621
P1	Glu pathway	Gln	Glutamine synthetase	GS2	CSS0007310	0.000646943	0	0.000753504	0	0	0	0	0		0.030525	0	0.0613874	0	0	0	0	0
P1	Glu pathway	Gln	Glutamine synthetase	GS1.2	CSS0015313	0.0340537	0.0807107	0.0441551	0.0966316	0.111451	0.0503633	0.0416389	0.0434046		1.37363	3.26087	2.39411	5.7775	5.79965	3.02419	2.60223	2.97398
P1	Glu pathway	Gln	Glutamine synthetase	GS1.3	CSS0007224	0.237763	0.187452	0.140829	0.229614	0.261515	0.164945	0.214887	0.201745		9.92063	7.3913	7.79619	12.9072	12.3023	8.26613	11.1524	12.6394
P1	Glu pathway	Gln	Glutamine synthetase	GS	CSS0019091	0.00246197	0	0	0.00246042	0	0	0.00585215	0		0.0915751	0	0	0.122926	0	0	0.371747	0
Gln synthesis					Total	0.535111	0.387403	0.413288	0.582045	0.642567	0.373308	0.564787	0.588		22.7717	15.7391	23.143	33.8045	31.283	19.9597	30.4833	36.0595
P1	Glu pathway	Arg	Argininosuccinate lyase	ASL	CSS0028335	0.00404231	0.00814134	0.0244396	0.0122846	0.00384047	0.00885353	0.0112947	0.0821791		0.18315	0.347826	1.35052	0.676091	0.175747	0.403226	0.743494	5.20446
Arg synthesis					Total	0.00404231	0.00814134	0.0244396	0.0122846	0.00384047	0.00885353	0.0112947	0.0821791		0.18315	0.347826	1.35052	0.676091	0.175747	0.403226	0.743494	5.20446
P1	Glu pathway	Pro	Pyrroline-5-carboxylate reductase	P5CR	CSS0041120	0.0141079	0.0202911	0.0112301	0.0205442	0.0187941	0.0137859	0.0139839	0.0186564		0.579976	0.826087	0.675261	1.29072	0.878735	0.604839	1.11524	1.11524
Pro synthesis					Total	0.0141079	0.0202911	0.0112301	0.0205442	0.0187941	0.0137859	0.0139839	0.0186564		0.579976	0.826087	0.675261	1.29072	0.878735	0.604839	1.11524	1.11524
P1	Glu pathway	Cit	Ornithine carbamoyltransferase	OTC	CSS0015335	0.00626043	0.0005253	0.0143167	0.00674947	0.0127738	0.00276419	0.0309296	0		0.30525	0.0434783	0.798036	0.368777	0.702988	0.201613	1.48699	0
P1	Glu pathway	Cit	Ornithine carbamoyltransferase	OTC	CSS0033638	0.000592062	0	0.00142309	0	0	0	0	0		0.030525	0	0.0613874	0	0	0	0	0
Cit synthesis					Total	0.00685249	0.0005253	0.0157398	0.00674947	0.0127738	0.00276419	0.0309296	0		0.335775	0.0434783	0.859423	0.368777	0.702988	0.201613	1.48699	0
P1	Glu pathway	Orn	N-acetylornithine aminotransferase	NAOT	CSS0020600	0.0493179	0.0759617	0.0501625	0.14167	0.16382	0.0321689	0.113409	0.0215651		2.0757	3.17391	2.88521	8.29748	7.73286	1.6129	6.3197	1.48699
Orn synthesis					Total	0.0493179	0.0759617	0.0501625	0.14167	0.16382	0.0321689	0.113409	0.0215651		2.0757	3.17391	2.88521	8.29748	7.73286	1.6129	6.3197	1.48699
P2	Asp pathway	Asp	Aspartate aminotransferase	AspAT	CSS0017097	0.108449	0.0850519	0.22301	0.110957	0.0212292	0.244745	0.138119	0.251678		4.60928	3.3913	12.1547	6.26921	0.878735	12.9032	6.69145	14.8699
P2	Asp pathway	Asp	Aspartate aminotransferase	AspAT	CSS0041167	0.0212297	0.0190639	0.0518433	0.0222873	0.0310646	0.0147755	0.0539761	0.0332215		0.946276	0.782609	2.94659	1.41364	1.40598	0.604839	3.71747	2.23048
P2	Asp pathway	Asp	Aspartate aminotransferase	AspAT	CSS0023667	0.00376805	0.00469545	0.00832309	0.00432247	0	0.00861596	0.0212984	0.0104227		0.18315	0.173913	0.491099	0.307314	0	0.403226	1.48699	0.743494
P2	Asp pathway	Asp	Aspartate aminotransferase	AspAT	CSS0003079	0.0152198	0.00986088	0.0114988	0.00552163	0	0.0163295	0.0331904	0.0191764		0.610501	0.391304	0.613874	0.307314	0	1.00806	1.85874	1.11524
P2	Asp pathway	Asp	Aspartate aminotransferase	AspAT	CSS0040668	0.38216	0.215623	0.623507	0.297606	0.210921	0.412441	0.551549	0.769346		15.873	8.65217	32.0442	16.9637	9.84183	21.371	28.2528	42.3792
P2	Asp pathway	Asp	Aspartate aminotransferase	AspAT	CSS0017789	0.00141521	0.000774173	0.00612126	0.00273923	0	0.0153058	0	0		0.0610501	0.0434783	0.306937	0.184388	0	0.604839	0	0
P2	Asp pathway	Asp	Aspartate aminotransferase	AspAT	CSS0014678	0.00198249	0	0.00197663	0.00353675	0	0	0	0.00414093		0.0915751	0	0.122775	0.245851	0	0	0	0.371747
P2	Asp pathway	Asp	Aspartate aminotransferase	AspAT	CSS0027866	0.125819	0.0749927	0.0882138	0.0840298	0.0648252	0.137982	0.0923829	0.33055		5.34188	3	5.15654	5.10141	3.16344	8.06452	4.83271	20.4461
Asp synthesis					Total	0.660044	0.410062	1.01449	0.531	0.32804	0.850195	0.890515	1.41854		27.7167	16.4348	53.8367	30.7929	15.29	44.9597	46.8401	82.1561
P2	Asp pathway	Asn	Asparagine synthetase	ASN	CSS0032369	0.28416	0.223301	0.308416	0.449899	0.343749	0.386504	0.36469	0.36456		11.8132	9	16.1449	23.7861	15.6415	19.9597	17.4721	21.9331
P2	Asp pathway	Asn	Asparagine synthetase	ASN	CSS0044161	0	0.00124856	0	0	0	0	0	0		0	0.0434783	0	0	0	0	0	0
P2	Asp pathway	Asn	Asparagine synthetase	ASN	CSS0034602	0.00323212	0.00982119	0.00995068	0.0142018	0	0.0190664	0.0222517	0		0.152625	0.391304	0.552486	0.860479	0	1.00806	1.11524	0
Asn synthesis					Total	0.287392	0.234371	0.318367	0.464101	0.343749	0.40557	0.386942	0.36456		11.9658	9.43478	16.6974	24.6466	15.6415	20.9677	18.5874	21.9331
P2	Asp pathway	Ile	Branched-chain amino acid aminotransferase	BCAT	CSS0003140	0.00359656	0.00443683	0.0115788	0.00327655	0.0136317	0.00544224	0	0.00440283		0.18315	0.173913	0.736648	0.184388	0.702988	0.403226	0	0.371747
P2	Asp pathway	Ile	Branched-chain amino acid aminotransferase	BCAT	CSS0023496	0.0932233	0.0168105	0.154364	0.0100837	0.00422224	0.117418	0.0320678	0.00450369		3.87668	0.695652	8.04174	0.553165	0.175747	6.45161	1.85874	0.371747
P2	Asp pathway	Ile	Branched-chain amino acid aminotransferase	BCAT	CSS0036801	0.399436	0.109163	0.306196	0.232707	0.111176	0.203977	0.0736025	0.0268586		15.812	4.43478	15.8379	12.2926	5.09666	10.8871	3.71747	1.11524
P2	Asp pathway	Ile	Branched-chain amino acid aminotransferase	BCAT	CSS0039128	0.312662	0.128155	0.273021	0.189479	0.108864	0.0594402	0.0574401	0.0884572		13.0342	5.21739	14.6716	11.0018	5.27241	3.22581	3.34572	5.94796
P2	Asp pathway	Ile	Branched-chain amino acid aminotransferase	BCAT	CSS0044075	0.32012	0.143193	0.187023	0.232625	0.152449	0.261574	0.133551	0.255984		13.2784	5.86957	10.5586	13.0301	7.38137	13.5081	6.69145	16.7286
Ile synthesis					Total	1.12904	0.401758	0.932183	0.668172	0.390343	0.647851	0.296661	0.380207		46.1844	16.3913	49.8465	37.0621	18.6292	34.4758	15.6134	24.5353
P2	Asp pathway	Lys	Diaminopimelate decarboxylase	DAPD	CSS0004507	0.0606384	0.0243946	0.0825458	0.0467094	0.0294262	0.0614632	0.0232536	0.115703		2.62515	1.04348	4.66544	2.95022	1.40598	3.42742	1.48699	7.80669
P2	Asp pathway	Lys	Diaminopimelate decarboxylase	DAPD	CSS0011384	0.0111819	0.0131143	0.0189803	0.044739	0.0328273	0.00554695	0.0220923	0.0113877		0.457875	0.521739	1.10497	2.76583	1.75747	0.201613	1.11524	0.743494
P2	Asp pathway	Lys	Diaminopimelate decarboxylase	DAPD	CSS0012852	0.0596162	0.0916908	0.0580197	0.173419	0.123962	0.0693464	0.0837997	0.14378		2.59463	3.69565	3.25353	10.2643	5.9754	3.83065	5.57621	9.66543
Lys synthesis					Total	0.131436	0.1292	0.159546	0.264868	0.186215	0.136357	0.129146	0.27087		5.67766	5.26087	9.02394	15.9803	9.13884	7.45968	8.17844	18.2156
P2	Asp pathway	Thr	Threonine synthase	THS	CSS0024216	0	0	0.00208452	0.00211545	0	0	0	0		0	0	0.122775	0.122926	0	0	0	0
P2	Asp pathway	Thr	Threonine synthase	THS	CSS0008835	0.0185079	0.0144837	0.0163745	0.0196887	0.0323253	0.0181087	0.0496481	0.020089		0.763126	0.608696	0.982198	1.16779	1.58172	1.00806	2.60223	1.48699
Thr synthesis					Total	0.0185079	0.0144837	0.018459	0.0218041	0.0323253	0.0181087	0.0496481	0.020089		0.763126	0.608696	1.10497	1.29072	1.58172	1.00806	2.60223	1.48699
P2	Asp pathway	Met	Methionine synthase	MS	CSS0014929	0.23543	0.422104	0.312354	0.980297	1.25265	0.189609	0.536209	0.224742		9.49328	15.8261	15.6538	42.901	46.3972	8.26613	24.9071	12.6394
P2	Asp pathway	Met	Methionine synthase	MS	CSS0005939	0.00652714	0.0210726	0.0118442	0.013494	0.0316603	0.00905307	0.0060702	0.013278		0.335775	0.869565	0.736648	0.921942	1.75747	0.403226	0.371747	0.743494
P2	Asp pathway	Met	Methionine synthase	MS	CSS0029437	0.0400981	0.0691252	0.0848935	0.0805386	0.133676	0.0526448	0.114723	0.138543		1.77045	2.73913	4.8496	4.67117	6.32689	2.62097	6.3197	8.55019
Met synthesis					Total	0.282056	0.512301	0.409092	1.07433	1.41799	0.251306	0.657003	0.376563		11.5995	19.4348	21.24	48.4942	54.4815	11.2903	31.5985	21.9331
P3	Pyruvate pathway	Ala	Alanine aminotransferase	ALT	CSS0049060	0.804564	0.667634	1.25305	1.05563	1.00245	1.07211	0.964209	1.13831		31.4103	25.6087	55.4328	51.5058	41.3005	49.3952	45.3532	56.8773
Ala synthesis					Total	0.804564	0.667634	1.25305	1.05563	1.00245	1.07211	0.964209	1.13831		31.4103	25.6087	55.4328	51.5058	41.3005	49.3952	45.3532	56.8773
P3	Pyruvate pathway	Leu	Branched-chain amino acid aminotransferase	BCAT	CSS0003140	0.00359656	0.00443683	0.0115788	0.00327655	0.0136317	0.00544224	0	0.00440283		0.18315	0.173913	0.736648	0.184388	0.702988	0.403226	0	0.371747
P3	Pyruvate pathway	Leu	Branched-chain amino acid aminotransferase	BCAT	CSS0023496	0.0932233	0.0168105	0.154364	0.0100837	0.00422224	0.117418	0.0320678	0.00450369		3.87668	0.695652	8.04174	0.553165	0.175747	6.45161	1.85874	0.371747
P3	Pyruvate pathway	Leu	Branched-chain amino acid aminotransferase	BCAT	CSS0036801	0.399436	0.109163	0.306196	0.232707	0.111176	0.203977	0.0736025	0.0268586		15.812	4.43478	15.8379	12.2926	5.09666	10.8871	3.71747	1.11524
P3	Pyruvate pathway	Leu	Branched-chain amino acid aminotransferase	BCAT	CSS0039128	0.312662	0.128155	0.273021	0.189479	0.108864	0.0594402	0.0574401	0.0884572		13.0342	5.21739	14.6716	11.0018	5.27241	3.22581	3.34572	5.94796
P3	Pyruvate pathway	Leu	Branched-chain amino acid aminotransferase	BCAT	CSS0044075	0.32012	0.143193	0.187023	0.232625	0.152449	0.261574	0.133551	0.255984		13.2784	5.86957	10.5586	13.0301	7.38137	13.5081	6.69145	16.7286
Leu synthesis					Total	1.12904	0.401758	0.932183	0.668172	0.390343	0.647851	0.296661	0.380207		46.1844	16.3913	49.8465	37.0621	18.6292	34.4758	15.6134	24.5353
P3	Pyruvate pathway	Val	Branched-chain amino acid aminotransferase	BCAT	CSS0003140	0.00359656	0.00443683	0.0115788	0.00327655	0.0136317	0.00544224	0	0.00440283		0.18315	0.173913	0.736648	0.184388	0.702988	0.403226	0	0.371747
P3	Pyruvate pathway	Val	Branched-chain amino acid aminotransferase	BCAT	CSS0023496	0.0932233	0.0168105	0.154364	0.0100837	0.00422224	0.117418	0.0320678	0.00450369		3.87668	0.695652	8.04174	0.553165	0.175747	6.45161	1.85874	0.371747
P3	Pyruvate pathway	Val	Branched-chain amino acid aminotransferase	BCAT	CSS0036801	0.399436	0.109163	0.306196	0.232707	0.111176	0.203977	0.0736025	0.0268586		15.812	4.43478	15.8379	12.2926	5.09666	10.8871	3.71747	1.11524
P3	Pyruvate pathway	Val	Branched-chain amino acid aminotransferase	BCAT	CSS0039128	0.312662	0.128155	0.273021	0.189479	0.108864	0.0594402	0.0574401	0.0884572		13.0342	5.21739	14.6716	11.0018	5.27241	3.22581	3.34572	5.94796
P3	Pyruvate pathway	Val	Branched-chain amino acid aminotransferase	BCAT	CSS0044075	0.32012	0.143193	0.187023	0.232625	0.152449	0.261574	0.133551	0.255984		13.2784	5.86957	10.5586	13.0301	7.38137	13.5081	6.69145	16.7286
Val synthesis					Total	1.12904	0.401758	0.932183	0.668172	0.390343	0.647851	0.296661	0.380207		46.1844	16.3913	49.8465	37.0621	18.6292	34.4758	15.6134	24.5353
P4	Aromatic amino acid pathway	Phe	Arogenate dehydrogenase	ADT	CSS0012905	0.0136645	0.0254752	0.0212669	0.0385465	0.0338749	0.0326127	0.0415566	0.0150097		0.579976	1	1.28913	2.27412	1.93322	1.81452	2.60223	1.11524
Phe synthesis					Total	0.0136645	0.0254752	0.0212669	0.0385465	0.0338749	0.0326127	0.0415566	0.0150097		0.579976	1	1.28913	2.27412	1.93322	1.81452	2.60223	1.11524
P4	Aromatic amino acid pathway	Tyr	Arogenate-prephenate dehydratase	TryA	CSS0016768	0.000645569	0.00561843	0.00377277	0.00403635	0.00687237	0.00763557	0.00972311	0.00695523		0.030525	0.217391	0.245549	0.245851	0.351494	0.403226	0.371747	0.371747
P4	Aromatic amino acid pathway	Tyr	Arogenate-prephenate dehydratase	TryA	CSS0023512	0.0155143	0.0227496	0.00982476	0.0216554	0.0217086	0.0378587	0.0193391	0.0155384		0.702076	0.913043	0.552486	1.41364	0.878735	2.01613	0.743494	1.11524
Tyr synthesis					Total	0.0161599	0.028368	0.0135975	0.0256917	0.028581	0.0454943	0.0290622	0.0224937		0.732601	1.13043	0.798036	1.6595	1.23023	2.41935	1.11524	1.48699
P4	Aromatic amino acid pathway	Trp	Tryptophan synthase	TPS	CSS0018757	0.00247571	0.000856653	0	0	0.00360963	0.00269755	0.00465844	0		0.0915751	0.0434783	0	0	0.175747	0.201613	0.371747	0
P4	Aromatic amino acid pathway	Trp	Tryptophan synthase	TPS	CSS0034968	0.00750971	0.0153648	0.00190297	0.00314249	0.01284	0.0309292	0.0331091	0.00672509		0.274725	0.608696	0.122775	0.184388	0.527241	1.41129	1.48699	0.371747
Trp synthesis					Total	0.00998542	0.0162214	0.00190297	0.00314249	0.0164496	0.0336268	0.0377676	0.00672509		0.3663	0.652174	0.122775	0.184388	0.702988	1.6129	1.85874	0.371747
P5	3-phosphoglycerate pathway	Ser	Phosphoserine phosphatase	PSPH	CSS0040501	0.0136931	0.00843669	0.0159495	0.0141581	0.0151648	0.0211909	0.0222115	0.0234639		0.641026	0.347826	0.92081	0.860479	0.702988	1.41129	1.11524	1.85874
P5	3-phosphoglycerate pathway	Ser	Phosphoserine phosphatase	PSPH	CSS0016421	0	0	0	0.000812681	0	0	0	0		0	0	0	0.0614628	0	0	0	0
P5	3-phosphoglycerate pathway	Ser	Phosphoserine phosphatase	PSPH	CSS0005049	0.00244269	0.00941645	0.00345985	0.0103117	0.0124225	0.00834733	0.00471296	0.00692601		0.1221	0.391304	0.184162	0.676091	0.527241	0.604839	0.371747	0.371747
Ser synthesis					Total	0.0161358	0.0178531	0.0194094	0.0252825	0.0275872	0.0295382	0.0269244	0.0303899		0.763126	0.73913	1.10497	1.59803	1.23023	2.01613	1.48699	2.23048
P5	3-phosphoglycerate pathway	Gly	Serine hydroxymethyltransferase	SHMT	CSS0015428	0.0114242	0	0.00535066	0.0144415	0.00574859	0.00785313	0	0.00589769		0.4884	0	0.306937	0.860479	0.527241	0.403226	0	0.371747
P5	3-phosphoglycerate pathway	Gly	Serine hydroxymethyltransferase	SHMT	CSS0001303	0.0303786	0.0429992	0.0891116	0.0526797	0.0559521	0.182993	0.0583341	0.0861838		1.25153	1.69565	3.62185	3.01168	2.81195	6.45161	2.97398	5.20446
P5	3-phosphoglycerate pathway	Gly	Serine hydroxymethyltransferase	SHMT	CSS0050050	0.0463908	0.0542939	0.0701261	0.105129	0.067244	0.101069	0.104347	0.177328		1.98413	2.3913	3.99018	6.33067	3.16344	5.64516	6.69145	12.2677
P5	3-phosphoglycerate pathway	Gly	Serine hydroxymethyltransferase	SHMT	CSS0002204	0.00711486	0.00358012	0.0140931	0.00862211	0.00238706	0.00923349	0	0		0.30525	0.130435	0.859423	0.491703	0.175747	0.604839	0	0
P5	3-phosphoglycerate pathway	Gly	Serine hydroxymethyltransferase	SHMT	CSS0018687	0.00169652	0.012341	0.00384857	0.00871649	0.00219139	0.00532612	0.0060702	0.00398046		0.0610501	0.478261	0.184162	0.491703	0.175747	0.201613	0.371747	0.371747
P5	3-phosphoglycerate pathway	Gly	Serine hydroxymethyltransferase	SHMT	CSS0007805	0.0321507	0.0210293	0.0301824	0.0248531	0.0545212	0.00929469	0.0224905	0.0318796		1.40415	0.869565	1.71885	1.53657	2.6362	0.604839	1.48699	1.85874
P5	3-phosphoglycerate pathway	Gly	Serine hydroxymethyltransferase	SHMT	CSS0030713	0.0125218	0.00719267	0.022277	0.0165971	0.00783716	0.00253804	0	0.010577		0.549451	0.26087	1.22775	0.860479	0.351494	0.201613	0	0.743494
Gly synthesis					Total	0.141677	0.141436	0.234989	0.231039	0.195882	0.318308	0.191242	0.315846		6.04396	5.82609	11.9091	13.5833	9.84183	14.1129	11.5242	20.8178
P5	3-phosphoglycerate pathway	Cys	Cysteine synthase	CS	CSS0045569	0.00662614	0.00750816	0.0179338	0.00621696	0	0.00676943	0	0.00515546		0.30525	0.304348	0.982198	0.368777	0	0.403226	0	0.371747
P5	3-phosphoglycerate pathway	Cys	Cysteine synthase	CS	CSS0034305	0.000767631	0	0	0	0	0	0	0		0.030525	0	0	0	0	0	0	0
P5	3-phosphoglycerate pathway	Cys	Cysteine synthase	CS	CSS0048224	0	0	0	0.00119622	0	0	0	0		0	0	0	0.0614628	0	0	0	0
Cys synthesis					Total	0.00739377	0.00750816	0.0179338	0.00741318	0	0.00676943	0	0.00515546		0.335775	0.304348	0.982198	0.43024	0	0.403226	0	0.371747

## Sheet: Amino acids synthesis activity
		Gene expression									Cell expressed
Glu synthesis	Total	1.81064	1.63243	1.94877	2.18358	1.50654	2.02261	1.21266	1.96049		67.9182	60.8696	91.8969	100	61.5114	94.1532	57.6208	100
Gln synthesis	Total	0.535111	0.387403	0.413288	0.582045	0.642567	0.373308	0.564787	0.588		22.7717	15.7391	23.143	33.8045	31.283	19.9597	30.4833	36.0595
Arg synthesis	Total	0.00404231	0.00814134	0.0244396	0.0122846	0.00384047	0.00885353	0.0112947	0.0821791		0.18315	0.347826	1.35052	0.676091	0.175747	0.403226	0.743494	5.20446
Pro synthesis	Total	0.0141079	0.0202911	0.0112301	0.0205442	0.0187941	0.0137859	0.0139839	0.0186564		0.579976	0.826087	0.675261	1.29072	0.878735	0.604839	1.11524	1.11524
Cit synthesis	Total	0.00685249	0.0005253	0.0157398	0.00674947	0.0127738	0.00276419	0.0309296	0		0.335775	0.0434783	0.859423	0.368777	0.702988	0.201613	1.48699	0
Orn synthesis	Total	0.0493179	0.0759617	0.0501625	0.14167	0.16382	0.0321689	0.113409	0.0215651		2.0757	3.17391	2.88521	8.29748	7.73286	1.6129	6.3197	1.48699
Asp synthesis	Total	0.660044	0.410062	1.01449	0.531	0.32804	0.850195	0.890515	1.41854		27.7167	16.4348	53.8367	30.7929	15.29	44.9597	46.8401	82.1561
Asn synthesis	Total	0.287392	0.234371	0.318367	0.464101	0.343749	0.40557	0.386942	0.36456		11.9658	9.43478	16.6974	24.6466	15.6415	20.9677	18.5874	21.9331
Ile synthesis	Total	1.12904	0.401758	0.932183	0.668172	0.390343	0.647851	0.296661	0.380207		46.1844	16.3913	49.8465	37.0621	18.6292	34.4758	15.6134	24.5353
Lys synthesis	Total	0.131436	0.1292	0.159546	0.264868	0.186215	0.136357	0.129146	0.27087		5.67766	5.26087	9.02394	15.9803	9.13884	7.45968	8.17844	18.2156
Thr synthesis	Total	0.0185079	0.0144837	0.018459	0.0218041	0.0323253	0.0181087	0.0496481	0.020089		0.763126	0.608696	1.10497	1.29072	1.58172	1.00806	2.60223	1.48699
Met synthesis	Total	0.282056	0.512301	0.409092	1.07433	1.41799	0.251306	0.657003	0.376563		11.5995	19.4348	21.24	48.4942	54.4815	11.2903	31.5985	21.9331
Ala synthesis	Total	0.804564	0.667634	1.25305	1.05563	1.00245	1.07211	0.964209	1.13831		31.4103	25.6087	55.4328	51.5058	41.3005	49.3952	45.3532	56.8773
Leu synthesis	Total	1.12904	0.401758	0.932183	0.668172	0.390343	0.647851	0.296661	0.380207		46.1844	16.3913	49.8465	37.0621	18.6292	34.4758	15.6134	24.5353
Val synthesis	Total	1.12904	0.401758	0.932183	0.668172	0.390343	0.647851	0.296661	0.380207		46.1844	16.3913	49.8465	37.0621	18.6292	34.4758	15.6134	24.5353
Phe synthesis	Total	0.0136645	0.0254752	0.0212669	0.0385465	0.0338749	0.0326127	0.0415566	0.0150097		0.579976	1	1.28913	2.27412	1.93322	1.81452	2.60223	1.11524
Tyr synthesis	Total	0.0161599	0.028368	0.0135975	0.0256917	0.028581	0.0454943	0.0290622	0.0224937		0.732601	1.13043	0.798036	1.6595	1.23023	2.41935	1.11524	1.48699
Trp synthesis	Total	0.00998542	0.0162214	0.00190297	0.00314249	0.0164496	0.0336268	0.0377676	0.00672509		0.3663	0.652174	0.122775	0.184388	0.702988	1.6129	1.85874	0.371747
Ser synthesis	Total	0.0161358	0.0178531	0.0194094	0.0252825	0.0275872	0.0295382	0.0269244	0.0303899		0.763126	0.73913	1.10497	1.59803	1.23023	2.01613	1.48699	2.23048
Gly synthesis	Total	0.141677	0.141436	0.234989	0.231039	0.195882	0.318308	0.191242	0.315846		6.04396	5.82609	11.9091	13.5833	9.84183	14.1129	11.5242	20.8178
Cys synthesis	Total	0.00739377	0.00750816	0.0179338	0.00741318	0	0.00676943	0	0.00515546		0.335775	0.304348	0.982198	0.43024	0	0.403226	0	0.371747
