# Supplementary material for: Root-specific theanine metabolism and regulation at the single-cell level in tea plants (Camellia sinensis)
Source: eLife. 2024 Oct 14;13:RP95891. doi: 10.7554/eLife.95891 (PMC11473105; doi:10.7554/eLife.95891)
Supplement: Supplementary file 6. [file elife-95891-supp6.xlsx]

## Sheet: Sheet1
		Gene expression									Cell expressed
Gene ID	Gene symbol	Cluster 1	Cluster 2	Cluster 3	Cluster 4	Cluster 5	Cluster 6	Cluster 7	Cluster 8		Cluster 1	Cluster 2	Cluster 3	Cluster 4	Cluster 5	Cluster 6	Cluster 7	Cluster 8
CSS0049154	CsTSI	0.40243	0.419902	0.50888	0.420102	0.241487	0.338631	0.277777	1.29523		16.1783	15.9565	25.1688	22.1266	11.2478	16.7339	13.7546	56.8773
CSS0043348	CsAlaDC	0.119352	0.047116	0.0619966	0.0671351	0.0217401	0.0812595	0.0150502	0.0323357		4.82295	1.82609	3.3763	3.62631	1.05448	4.23387	0.743494	1.11524
CSS0037306	CsGS1.1	0.0305637	0.0330743	0.0102913	0.0459201	0.0699477	0.0142572	0.0378551	0.0967981		1.28205	1.34783	0.552486	2.70436	3.33919	0.806452	2.23048	5.57621
CSS0015313	CsGS1.2	0.0340537	0.0807107	0.0441551	0.0966316	0.111451	0.0503633	0.0416389	0.0434046		1.37363	3.26087	2.39411	5.7775	5.79965	3.02419	2.60223	2.97398
CSS0007224	CsGS1.3	0.237763	0.187452	0.140829	0.229614	0.261515	0.164945	0.214887	0.201745		9.92063	7.3913	7.79619	12.9072	12.3023	8.26613	11.1524	12.6394
CSS0007310	CsGS2	0.000646943	0	0.000753504	0	0	0	0	0		0.030525	0	0.0613874	0	0	0	0	0
CSS0007758	CsGOGAT1	0.593883	0.810754	1.01339	1.05344	0.389015	0.906828	0.746218	1.01676		22.3443	29.7391	46.9613	48.9859	17.3989	41.9355	34.2007	49.0706
CSS0050330	CsGOGAT2	0.145032	0.301956	0.250375	0.255853	0.118186	0.293874	0.1046	0.228222		5.95238	11.5217	12.8913	14.075	5.09666	15.3226	5.57621	13.0112
CSS0044676	CsGOGAT3	0.00230745	0.000937537	0	0.000885052	0	0	0	0		0.0915751	0.0434783	0	0.0614628	0	0	0	0
CSS0002543	CsGDH2	0.00919528	0.00542639	0.0187202	0.00828305	0.0104755	0.00713047	0.0264019	0.0217558		0.42735	0.217391	1.10497	0.491703	0.527241	0.403226	1.48699	1.48699
CSS0046767	CsGDH3	0.00318736	0.00505702	0.00269648	0	0	0.00362508	0	0.0273302		0.1221	0.173913	0.184162	0	0	0.201613	0	1.85874
CSS0007238	CsGDH4	0.159814	0.0783708	0.138452	0.143363	0.0416681	0.124833	0.0359755	0.0411899		6.92918	3.26087	7.42787	7.86724	2.28471	6.65323	1.48699	2.60223
CSS0049060	CsALT	0.804564	0.667634	1.25305	1.05563	1.00245	1.07211	0.964209	1.13831		31.4103	25.6087	55.4328	51.5058	41.3005	49.3952	45.3532	56.8773
CSS0004668	CsMYB40	0.00337962	0.00575846	0.00610886	0.0184975	0.00268635	0.00236926	0.0179376	0		0.152625	0.26087	0.368324	1.10633	0.175747	0.201613	1.11524	0
CSS0031217	CsHHO3	0.0114813	0.00927924	0.0309942	0.0100131	0.00351123	0.0182028	0.0172499	0.0135372		0.4884	0.347826	1.78023	0.614628	0.175747	1.00806	1.11524	0.743494
CSS0036526	CsMYB6	0.00293076	0.00232749	0.00435412	0.00199802	0	0.00353794	0	0		0.1221	0.0869565	0.245549	0.122926	0	0.201613	0	0
CSS0035405	CsAAP1	0	0	0	0.00294192	0	0	0	0		0	0	0	0.184388	0	0	0	0
CSS0024604	CsAAP2	0.0416196	0.0998685	0.0746956	0.181906	0.0977466	0.134857	0.0986944	0.11269		1.73993	3.86957	4.11295	9.52674	4.39367	7.8629	5.20446	7.43494
CSS0013308	CsAAP4	0	0	0	0	0	0	0	0		0	0	0	0	0	0	0	0
CSS0002125	CsAAP5	0	0	0	0	0	0.00568202	0	0		0	0	0	0	0	0.201613	0	0
CSS0039117	CsAAP6	0	0	0.00108533	0.00101122	0	0	0	0		0	0	0.0613874	0.0614628	0	0	0	0
CSS0013258	CsAAP8	0	0	0.00104632	0	0.00230899	0	0	0		0	0	0.0613874	0	0.175747	0	0	0
