# Supplementary material for: Root-specific theanine metabolism and regulation at the single-cell level in tea plants (Camellia sinensis)
Source: eLife. 2024 Oct 14;13:RP95891. doi: 10.7554/eLife.95891 (PMC11473105; doi:10.7554/eLife.95891)
Supplement: Supplementary file 7. [file elife-95891-supp7.xlsx]

## Sheet: Sheet1
Transcript ID	Gene ID	CSSv2_Rt-0N-1_TPM	CSSv2_Rt-0N-2_TPM	CSSv2_Rt-0N-3_TPM	CSSv2_Rt-0N-4_TPM	Rt-0N	CSSv2_Rt-CK-1_TPM	CSSv2_Rt-CK-2_TPM	CSSv2_Rt-CK-3_TPM	CSSv2_Rt-CK-4_TPM	Rt-CK	CSSv2_Rt-Et-1_TPM	CSSv2_Rt-Et-2_TPM	CSSv2_Rt-Et-3_TPM	CSSv2_Rt-Et-4_TPM	Rt-Et	CSSv2_Rt-NH4-1_TPM	CSSv2_Rt-NH4-2_TPM	CSSv2_Rt-NH4-3_TPM	CSSv2_Rt-NH4-4_TPM	Rt-NH4	CSSv2_Rt-NO3-1_TPM	CSSv2_Rt-NO3-2_TPM	CSSv2_Rt-NO3-3_TPM	CSSv2_Rt-NO3-4_TPM	Rt-NO3
CSS0000001.1	CSS0000001	0	0.22	0.72	0.41	0.3375	0.1	0.22	0	0.12	0.11	0.2	0	0.3	0.16	0.165	0	0.21	0	0.14	0.0875	0.1	0.1	0	0.1	0.075
CSS0000002.1	CSS0000002	0	0	0	0	0	0	0	0	0	0	0.14	0.17	0	0.32	0.1575	0.58	0	0	0.3	0.22	0	0	0.43	0.14	0.1425
CSS0000003.1	CSS0000003	185.93	186.71	195.04	176.53	186.052	159.34	174.77	160	178.41	168.13	176.35	149.29	178.55	177.82	170.502	179.47	168.35	170.83	215.88	183.632	187.11	151.74	176.15	189.45	176.113
CSS0000004.1	CSS0000004	1	1.49	0.99	1.17	1.1625	0.99	1.18	0.87	1.2	1.06	0.99	1.49	1.2	1.71	1.3475	0.93	0.79	0.88	0.77	0.8425	0.85	0.7	0.93	1.1	0.895
CSS0000005.1	CSS0000005	0.9	0.34	0.68	0.8	0.68	1.16	0.53	2.23	1.42	1.335	0.68	0.11	0.22	0.13	0.285	0.12	0.58	0.59	1.64	0.7325	0.34	0.35	1.26	0.11	0.515
CSS0000006.1	CSS0000006	6.91	7.03	7.28	8	7.305	5.78	4.55	5.25	4.4	4.995	6.46	5.27	5.14	6.62	5.8725	4.96	4.75	4.63	6.29	5.1575	7.07	8	7.41	6.82	7.325
CSS0000007.1	CSS0000007	2.68	2.18	2.71	2.19	2.44	1.73	2.45	2.31	1.62	2.0275	3.32	1.66	1.87	2.87	2.43	1.91	1.6	1.32	3.4	2.0575	2.06	1.87	2.45	2.41	2.1975
CSS0000008.1	CSS0000008	2.36	2.66	2.29	2.92	2.5575	1.22	2.46	1.55	2.23	1.865	1.58	1.25	1.45	1.64	1.48	1.1	0.95	1.01	0.99	1.0125	1.22	0.93	2.11	2.04	1.575
CSS0000009.1	CSS0000009	13.71	13.65	14.86	9.87	13.0225	6.12	8.3	10.81	1.7	6.7325	14.36	14.77	10.34	15.82	13.8225	9.02	9.92	10.69	26.93	14.14	20.32	23.55	14.35	16.02	18.56
CSS0000010.1	CSS0000010	4.61	5.72	4.74	4	4.7675	2.31	3.56	2.73	2.37	2.7425	3.81	2.57	2.91	4.27	3.39	3.21	3.48	2.83	4.11	3.4075	3.74	4.6	4.48	3.44	4.065
CSS0000011.1	CSS0000011	0	0	0	0	0	0	0	0	0	0	0	0	0	0	0	0	0	0	0	0	0	0	0	0	0
CSS0000012.1	CSS0000012	230.19	299.62	277.24	237.11	261.04	125.25	119.34	154.08	109.45	127.03	265.6	245.33	241.35	295.19	261.868	126.87	124.09	122.84	239.15	153.238	218.3	185.85	251.91	212.57	217.157
CSS0000013.1	CSS0000013	21.84	19.8	18.36	19.19	19.7975	28.69	25.39	25.18	24.87	26.0325	21.07	17.76	18.55	21.43	19.7025	30.45	29.19	29.33	16.79	26.44	15.92	17.48	15.2	13.95	15.6375
CSS0000014.1	CSS0000014	0	0	0	0	0	0.39	0	0	0	0.0975	0	0	0	0	0	0	0	0	0	0	0	0.3	0	0	0.075
CSS0000015.1	CSS0000015	21.51	24.15	17.87	22.39	21.48	12.72	17.14	14.19	13.08	14.2825	15.83	16.13	14.81	21	16.9425	15.91	17.15	15.54	17.27	16.4675	18.07	18.09	20.83	22.67	19.915
CSS0000016.1	CSS0000016	0	0	0	0	0	0	0	0	0	0	0	0	0	0	0	0	0	0	0	0	0	0	0	0	0
CSS0000017.1	CSS0000017	30.44	29.64	47.49	24.72	33.0725	12.1	8.08	33.01	9.05	15.56	19.86	20.25	13.73	11.54	16.345	13.09	22.27	16.51	35.68	21.8875	64.71	60.6	34.33	43.34	50.745
CSS0000018.1	CSS0000018	7.66	8.44	7.27	4.15	6.88	4.87	6.26	6.4	4.94	5.6175	5.72	6.89	5.4	5.79	5.95	5.17	5.81	5.62	6.09	5.6725	4.68	6.73	6.7	4.52	5.6575
CSS0000019.1	CSS0000019	13.73	9.38	9.49	7.93	10.1325	10.33	7.34	7.72	4.26	7.4125	5.74	8.41	5.92	6.51	6.645	8.33	6.5	5.61	6.05	6.6225	6.26	7.06	7.29	6.29	6.725
CSS0000020.1	CSS0000020	2.53	3.13	3.05	2.89	2.9	1.91	2.25	2.39	1.48	2.0075	3.23	2.68	1.76	2.37	2.51	1.92	2.35	2.23	1.9	2.1	3.03	2.66	2.81	2.69	2.7975
CSS0000021.1	CSS0000021	6.18	7.63	7.15	8.38	7.335	3.8	5.34	6.07	3.96	4.7925	4.63	4.42	3.91	7.72	5.17	4.45	5.9	5.21	5.12	5.17	8.98	8.01	6.42	6.83	7.56
CSS0000022.1	CSS0000022	8.13	8.59	8.16	9.74	8.655	8.96	9.63	9.85	9.73	9.5425	9.11	10.46	11.9	9.99	10.365	7.23	9.15	8.38	12.21	9.2425	9.56	8.52	10.02	10.69	9.6975
CSS0000023.1	CSS0000023	0	0	0.37	0	0.0925	0	0.19	0	0	0.0475	0	0	0	0	0	0	0.23	0	0.22	0.1125	0.22	0	0	0.39	0.1525
CSS0000024.1	CSS0000024	13.05	14.12	11.41	13.79	13.0925	9.14	11.6	11.96	7.59	10.0725	14.93	9.79	9.34	15.56	12.405	7.9	7.62	10.57	9.24	8.8325	18.1	23.86	18.16	12.4	18.13
CSS0000025.1	CSS0000025	0	0	0	0	0	0	0	0	0	0	0	0	0	0	0	0	0	0	0	0	0	0	0	0	0
CSS0000026.1	CSS0000026	4.75	5.13	4.39	4.76	4.7575	4.52	3.87	3.26	2.64	3.5725	5.5	4.19	3.35	4.16	4.3	3.59	4.06	2.91	3.26	3.455	4.1	4.59	3.65	4.3	4.16
CSS0000027.1	CSS0000027	9.14	7.69	6.96	10.72	8.6275	8.07	7.64	9.68	10.7	9.0225	6.92	8.76	7.56	9.35	8.1475	8.09	8.36	8.77	8.79	8.5025	8.92	8.48	7.99	8.78	8.5425
CSS0000028.1	CSS0000028	47.11	86.04	28.16	22.19	45.875	13.94	34.35	6.13	7.63	15.5125	58.13	22.07	19.88	37.75	34.4575	14.78	0	14.25	0	7.2575	15.35	22.1	85.13	7.89	32.6175
CSS0000029.1	CSS0000029	53.26	43.82	40.63	52.55	47.565	39.9	57.35	34.95	40.1	43.075	43.24	41.26	41.02	41.2	41.68	51.4	45.63	45.99	35.43	44.6125	48.57	61.46	55.08	47.93	53.26
CSS0000030.1	CSS0000030	0	0	0	0	0	0	0	0	0	0	0	0	0	0	0	0	0	0	0	0	0	0	0	0	0
CSS0000031.1	CSS0000031	0	0	0	0	0	0	0	0	0	0	0	0	0	0	0	0	0	0	0	0	0	0	0	0	0
CSS0000032.1	CSS0000032	6.85	7.44	7.15	6.86	7.075	3.07	5.07	10.11	3.37	5.405	5.51	6	3.51	4.72	4.935	3.94	4.5	4.87	7.78	5.2725	7.24	4.09	5.47	11.21	7.0025
CSS0000033.1	CSS0000033	18.28	19.52	16.47	17.21	17.87	13.2	14.48	11.87	9.6	12.2875	17.97	15.29	12.59	20.57	16.605	15.13	11.22	10.97	16.91	13.5575	16.68	18.03	17.34	13.2	16.3125
CSS0000034.1	CSS0000034	8.29	9.94	12.69	8.45	9.8425	4.55	2.92	10.42	4.31	5.55	9.29	5.77	8.16	5.16	7.095	5.18	7.67	6.8	15.9	8.8875	15.18	13.08	10.99	12.95	13.05
CSS0000035.1	CSS0000035	0	0	0	0	0	0	0	0	0	0	0	0	0	0	0	0	0	0	0	0	0	0	0	0	0
CSS0000036.1	CSS0000036	0	0	0	0	0	0	0	0	0	0	0	0	0	0	0	0	0	0	0	0	0	0	0	0	0
CSS0000037.1	CSS0000037	0	0	0	2.39	0.5975	0	0	0	2.54	0.635	0	0	2.16	0	0.54	2.38	0	0	0	0.595	0	4.75	0	0	1.1875
CSS0000038.1	CSS0000038	0	0	0	0	0	0	0	0	0	0	0	0	0	0	0	1.59	1.06	0	0	0.6625	0	0	0	0	0
CSS0000039.1	CSS0000039	0	0.24	0	0	0.06	0	0	0	0	0	0	0	0.11	0	0.0275	0	0	0	0	0	0	0	0	0.22	0.055
CSS0000040.1	CSS0000040	99.41	110	120.04	88.83	104.57	123.4	115.12	86.13	118.94	110.897	109.77	89.54	115.69	102.66	104.415	109.77	129.25	108.09	105.71	113.205	111.72	113.93	112.9	80.68	104.808
CSS0000041.1	CSS0000041	638.59	411.6	447.56	625.3	530.763	984.5	1628.29	1520.62	1678.31	1452.93	814.16	999.26	1939	818.31	1142.68	551.25	1036.37	1386.15	1079.35	1013.28	680.93	642.08	902.87	845.84	767.93
CSS0000042.1	CSS0000042	0.93	0.75	21.08	6.33	7.2725	781.77	629.55	104.69	729.8	561.452	68.37	284.33	55.79	170.68	144.793	1016.92	268.66	391.5	73.22	437.575	4.11	7.74	8.84	3.72	6.1025
CSS0000043.1	CSS0000043	0	0.97	0	0	0.2425	0	0.3	0.27	0.35	0.23	0	0	0	0.35	0.0875	0	0	0	0	0	0.3	0	0	0	0.075
CSS0000044.1	CSS0000044	4.93	4.88	5.76	7.49	5.765	6.66	5.38	3.26	5.11	5.1025	5.35	7.24	5.01	5.58	5.795	6.94	4.83	4.02	4.2	4.9975	3.28	7.05	5.29	3.33	4.7375
CSS0000045.1	CSS0000045	0	0	0	0	0	0	0	0	0	0	0	0	0	0	0	0	0	0	0	0	0	0	0	0	0
CSS0000046.1	CSS0000046	21.5	25.99	22.91	17.05	21.8625	26.5	32.24	12.45	19.39	22.645	38.33	28.87	19.57	31.4	29.5425	25.91	16.62	18.85	20.45	20.4575	19.81	27.58	27.41	16.47	22.8175
CSS0000047.1	CSS0000047	166.55	158.98	208.23	156.58	172.585	227.04	174.35	225.49	181.63	202.127	192.21	190.44	230.6	213.76	206.752	196.88	268.21	218.29	337.53	255.227	272.12	228.45	218.74	232.7	238.002
CSS0000048.1	CSS0000048	0	0	0	0	0	0	0	0	0	0	0	0	0	0	0	0	0	0	0	0	0	0	0	0	0
CSS0000049.1	CSS0000049	0.2	0	0.1	0.05	0.0875	0.05	0.15	0.05	0.12	0.0925	0	0	0	0.06	0.015	0	0.05	0	0	0.0125	0.22	0.18	0.26	0.1	0.19
CSS0000050.1	CSS0000050	15.09	22.77	15.56	13.87	16.8225	23.63	22.83	10.83	8.39	16.42	16.14	23.21	21.93	27.14	22.105	11.11	13.67	13.31	7.54	11.4075	11.97	17.93	24.49	7.46	15.4625
CSS0000051.1	CSS0000051	4.31	3.54	4.42	4.47	4.185	3.95	2.91	2.92	2.54	3.08	3.86	3.56	2.48	4.87	3.6925	2.98	2.85	3.82	3.81	3.365	3.71	4.43	4.15	4.02	4.0775
CSS0000052.1	CSS0000052	0	0	0	0	0	0	0	0	0	0	0	0	0	0	0	0	0	0	0	0	0	0	0	0	0
CSS0000053.1	CSS0000053	15.44	17.92	15.65	16.18	16.2975	11.35	8.08	10.89	7.68	9.5	12.65	20.1	14.16	18.94	16.4625	7.46	12.44	13.26	9.14	10.575	17.11	24.3	16.28	13.11	17.7
CSS0000054.1	CSS0000054	24.58	19.34	17.69	20.87	20.62	15.05	22.08	17.72	16.21	17.765	19.34	20.9	22.54	21.42	21.05	18	18.36	19.33	19.5	18.7975	17.47	22.65	20.8	20.44	20.34
CSS0000055.1	CSS0000055	11.59	24.43	31.71	20.7	22.1075	52.49	39.09	33.91	37.13	40.655	45.09	63.9	73.45	57.72	60.04	43.59	37.27	38.39	18.17	34.355	27.97	16.14	20.35	15.57	20.0075
CSS0000056.1	CSS0000056	0	0	0	0	0	0	0	0	0	0	0	0	0	0	0	1.08	0	0	0	0.27	0	0	0	0	0
CSS0000057.1	CSS0000057	12.17	13.2	13.96	13.25	13.145	10.12	13.13	12.98	9.93	11.54	14.78	12.57	12.1	14.8	13.5625	12.78	11.64	13.4	18.71	14.1325	21.67	20.01	15.7	16.73	18.5275
CSS0000058.1	CSS0000058	0	0	0	0	0	0	0	0	0	0	0	0	0	0	0	0	0	0	0	0	0	0	0	0	0
CSS0000059.1	CSS0000059	0.25	0.83	0.2	0.2	0.37	0.94	0.98	0.53	0.23	0.67	1.17	0.58	0	0	0.4375	0.2	0.79	1.22	0	0.5525	0.59	0.2	0	0.2	0.2475
CSS0000060.1	CSS0000060	0	0	0	0	0	0	0	14.59	0	3.6475	0	0	0	0	0	0	0	0	0	0	0	0	0	0	0
CSS0000061.1	CSS0000061	8.04	8.4	7.73	9.11	8.32	6.82	8.35	6.87	8.96	7.75	7.95	8.23	5.86	7.4	7.36	7.68	5.74	6.63	9.54	7.3975	8.5	6.86	8.89	7.89	8.035
CSS0000062.1	CSS0000062	0	0	0	0	0	0	0	0	0	0	0	0	0	0	0	0	0	0	0	0	0	0	0	0	0
CSS0000063.1	CSS0000063	13.2	10.13	9.14	12.99	11.365	7.12	8.79	5.37	6.65	6.9825	8.78	8.46	8.3	7.12	8.165	6.3	7.29	8.18	5.03	6.7	6.61	6.9	8.12	6.39	7.005
CSS0000064.1	CSS0000064	32.59	30.13	26.7	18.77	27.0475	24.55	21.12	37.1	19.63	25.6	17.61	23.11	25.74	17.3	20.94	20.76	20.66	19.36	32.85	23.4075	19.93	18.97	16.44	26.7	20.51
CSS0000065.1	CSS0000065	21.67	18.28	19.43	19.37	19.6875	13.49	17.46	13.52	10.95	13.855	20.27	16.38	12.59	20.26	17.375	21.71	17.61	17.88	14	17.8	18.6	23.9	17.94	19.27	19.9275
CSS0000066.1	CSS0000066	0.23	0	0	0	0.0575	0	0	0	0	0	0	0	0	0	0	0	0	0	0	0	0	0	0	0	0
CSS0000067.1	CSS0000067	0	0	0	0	0	0	0	0	0	0	0	0	0	0	0	0	0	0	0	0	0	0	0	0	0
CSS0000068.1	CSS0000068	18.97	24.88	18.25	26.7	22.2	21.16	28.99	26.3	30.96	26.8525	25.5	32.65	32.02	36.33	31.625	25.11	26.45	29.5	31.86	28.23	25.52	26.32	28.22	26.86	26.73
CSS0000069.1	CSS0000069	1.46	1.06	2.12	1.31	1.4875	0.62	0.36	0.43	0.42	0.4575	0.41	1.11	0.64	0.66	0.705	0.3	0.18	0.49	0.32	0.3225	0.94	1.1	0.91	1.06	1.0025
CSS0000070.1	CSS0000070	53.75	65.2	56.4	61.53	59.22	34.77	46.25	36.92	22.15	35.0225	54.14	43.74	40.99	50.57	47.36	25.89	36.72	34.37	35.84	33.205	48.85	74.31	64.78	51.12	59.765
CSS0000071.1	CSS0000071	1.15	0.42	1.09	0.91	0.8925	0.73	1.07	0.71	0.88	0.8475	0.92	0.61	0.68	0.68	0.7225	0.57	0.49	0.54	1.48	0.77	1.42	0.56	0.9	1.6	1.12
CSS0000072.1	CSS0000072	0	0	0	0	0	0	0	0	0	0	0	0	0	0	0	0	0	0	0	0	0	0	0	0	0
CSS0000073.1	CSS0000073	0	0	0	0	0	0	0	0	0	0	0	0	0	0	0	0	0.2	0	0	0.05	0	0	0	0	0
CSS0000074.1	CSS0000074	0	0	0	0	0	0	0	0	0	0	0	0	0	0	0	0	0	0	0	0	0	0	0	0	0
CSS0000075.1	CSS0000075	14.71	14.25	15.21	11.92	14.0225	9.87	10.56	12.11	8.88	10.355	19.44	14.29	9.82	13.85	14.35	11.65	9.64	10.96	11.56	10.9525	14.9	13.58	11.66	12.72	13.215
CSS0000076.1	CSS0000076	2.22	1.55	1.64	1.48	1.7225	1.49	2.34	1.57	1.64	1.76	1.8	2.14	2.12	2.32	2.095	2.13	0.87	1.89	2.76	1.9125	1.11	2.15	1.6	1.97	1.7075
CSS0000077.1	CSS0000077	0	0	0	0	0	0	0	0	0	0	0	0	0	0	0	0	0	0	0	0	0	0	0	0	0
CSS0000078.1	CSS0000078	43.9	42.85	36.52	41.54	41.2025	33.67	40.07	25.42	31.06	32.555	33.77	34.92	27.71	36.89	33.3225	31.76	34.89	34.54	24	31.2975	31.74	37.12	36.48	32.02	34.34
CSS0000079.1	CSS0000079	0	0	0	0	0	0	0	0	0	0	0	0	0	0	0	0	0	0	0	0	0	0	0	0	0
CSS0000080.1	CSS0000080	58.94	75.47	63.45	66.1	65.99	7.2	7.54	15.87	5.01	8.905	34.81	41.71	31.41	41.72	37.4125	7.67	14.8	8.15	11.88	10.625	61.27	47.01	75.55	55.78	59.9025
CSS0000081.2	CSS0000081	5.89	7.5	7.3	7.68	7.0925	5.96	5.74	5.69	6.87	6.065	5.87	7.2	6.68	6.37	6.53	5.96	7.33	7.07	6.13	6.6225	6.9	6.08	6.37	5.37	6.18
CSS0000082.1	CSS0000082	6.78	5.67	5.03	5.53	5.7525	2.93	4.95	4.3	4.26	4.11	4.61	3.32	3.82	4.19	3.985	3.06	3.9	5.44	4.37	4.1925	3.96	3.66	3.97	5.2	4.1975
CSS0000083.1	CSS0000083	0	0	0	0	0	0	0	0	0	0	0	0	0	0	0	0	0	0	0	0	0	0	0	0	0
CSS0000084.1	CSS0000084	1.54	0.93	1.66	1.36	1.3725	1.29	2.03	1.19	1.05	1.39	2.42	1.8	1.84	1.68	1.935	1.34	1.42	0.97	2.26	1.4975	2	1.61	1.86	1.65	1.78
CSS0000085.1	CSS0000085	0	0	0	0	0	0	0	0	0	0	0	0	0	0	0	0	0	0	0	0	0	0	0	0	0
CSS0000086.1	CSS0000086	0	0	0	0	0	0	0	0	0	0	0	0	0	0	0	0	0	0	0	0	0	0	0	0	0
CSS0000087.1	CSS0000087	8.06	6.76	7.06	7.28	7.29	5.39	7.12	5.56	4.82	5.7225	7.03	6.83	5.71	7.42	6.7475	6.47	5.61	6.52	6.82	6.355	7.46	7.61	7.28	8.26	7.6525
CSS0000088.1	CSS0000088	0.14	0.28	0	0.13	0.1375	0	0	0	0	0	0.26	0.13	0	0	0.0975	0	0	0	0	0	0	0	0	0.18	0.045
CSS0000089.1	CSS0000089	0	0	0	0	0	0	0	0	0	0	0	0	0	0	0	0	0	0	0	0	0	0	0	0	0
CSS0000090.1	CSS0000090	0	0.73	0.34	0	0.2675	0	0	0	0	0	1.35	0	0.33	0.39	0.5175	0.7	1.38	0	0.37	0.6125	0.68	0	0	0	0.17
CSS0000091.1	CSS0000091	25.74	27	23.58	31.51	26.9575	23.06	25.82	25.14	20.9	23.73	31.77	32.34	33.37	32.75	32.5575	22.69	17.71	22.3	33.43	24.0325	25.97	26.7	27.93	27.99	27.1475
CSS0000092.1	CSS0000092	1.16	1.37	0.81	0.33	0.9175	0.93	1.94	0.73	1.34	1.235	0.48	0.8	1.9	1.46	1.16	0.17	0.82	0.84	1.39	0.805	0.81	2.18	1.17	1.13	1.3225
CSS0000093.1	CSS0000093	5.91	5.29	5.71	5.5	5.6025	6.08	6.04	5.11	3.92	5.2875	7.24	5.27	4.59	7.47	6.1425	5.97	6.68	6.05	8.71	6.8525	5.95	6.39	5.17	5.5	5.7525
CSS0000094.1	CSS0000094	5.84	5.72	9.03	5.75	6.585	6.3	8.51	7.23	8.5	7.635	7.32	8.25	8.69	8.61	8.2175	7.41	7.76	10.17	11.76	9.275	9.19	8.21	8.26	9.09	8.6875
CSS0000095.1	CSS0000095	0	0.29	0.42	0.14	0.2125	0.13	0.5	0	0	0.1575	0	0.14	0	0	0.035	0.29	0	0.29	0.15	0.1825	0	0	0.58	0	0.145
CSS0000096.1	CSS0000096	0.22	0.18	0.09	0.04	0.1325	0	0.09	0.08	0.05	0.055	0.09	0.04	0.39	0	0.13	0	0.04	0	0.23	0.0675	0.17	0.09	0	0.09	0.0875
CSS0000097.1	CSS0000097	33.62	31.94	50.52	16.13	33.0525	7.13	3.72	28.01	2.65	10.3775	1.83	1	2.19	0	1.255	5.67	20.77	15.33	37.69	19.865	48.82	51.47	28.48	68.74	49.3775
CSS0000098.1	CSS0000098	0	0	0	0	0	0	0	0	0	0	0	0	0	0	0	0	0	0	0	0	0	0	0	0	0
CSS0000099.1	CSS0000099	1.38	1.32	2.06	1.35	1.5275	2.02	0.88	0.69	0.42	1.0025	1.29	1.82	1.13	1.36	1.4	1.13	0.76	1.69	0.9	1.12	1.44	1.22	1.21	2.51	1.595
CSS0000100.1	CSS0000100	0.23	0.06	0.11	0.17	0.1425	0.11	0	0	0	0.0275	0	0	0	0.06	0.015	0.06	0	0	0.12	0.045	0	0.06	0	0	0.015
CSS0000101.1	CSS0000101	6.65	6.97	7.78	5.94	6.835	6.31	5.04	6.44	6.11	5.975	5.71	7.25	4.7	5.39	5.7625	6.66	8.86	7.47	9.73	8.18	10.01	10.56	6.06	9.21	8.96
CSS0000102.1	CSS0000102	0.09	0	0	0.18	0.0675	0.26	0.09	0.08	0.11	0.135	0.27	0	0.27	0.1	0.16	0.47	0	0.09	0	0.14	0.19	0.48	0.09	0.18	0.235
CSS0000103.2	CSS0000103	11.12	10.29	10.36	9.99	10.44	9.07	10.53	10.4	9.38	9.845	9.36	9.26	10.09	9.82	9.6325	10.69	10.54	12.5	11.5	11.3075	14.93	12.28	10.38	10.11	11.925
CSS0000104.1	CSS0000104	0	0.47	0.07	0.33	0.2175	3.36	0.93	0.13	1.54	1.49	1.5	2.03	1.63	1.61	1.6925	4	0.67	0.76	0.31	1.435	0.21	0.15	0.44	0.14	0.235
CSS0000105.1	CSS0000105	0.41	0.57	0.45	0.21	0.41	0.34	0.45	0.49	0	0.32	0.69	0.52	0.68	0.21	0.525	0.48	0.22	0.17	0.83	0.425	0.95	0.62	0.59	0.22	0.595
CSS0000106.1	CSS0000106	1.6	2.89	2.33	2.76	2.395	1.86	2.53	3.53	1.83	2.4375	2.7	2.31	1.33	2.2	2.135	2	1.58	2.22	4.4	2.55	2.91	2.22	3.63	2.35	2.7775
CSS0000107.1	CSS0000107	0.14	0	0.28	0	0.105	0	0.28	0	0	0.07	0	0	0	0	0	0.14	0.14	0	0	0.07	0	0.14	0.29	0.14	0.1425
CSS0000108.1	CSS0000108	0.17	0	0	0	0.0425	0.16	0	0.3	0.19	0.1625	0	0	0	0	0	0.17	0.16	0	0	0.0825	0	0	0	0	0
CSS0000109.1	CSS0000109	23.87	31.8	35.37	31.87	30.7275	29.83	23.17	27.96	34.89	28.9625	37.29	29.06	37.02	34.71	34.52	27.09	32.39	25.99	33.53	29.75	32.14	31.79	22.36	31.21	29.375
CSS0000110.1	CSS0000110	0	0	0	0	0	0	0	0	0	0	0	0	0	0	0	0	0	0	0	0	0	0	0	0	0
CSS0000111.1	CSS0000111	38.59	41.38	34.57	44.7	39.81	40.3	60.66	52.26	62.39	53.9025	46.57	51.14	51.52	50.67	49.975	52.55	61.51	58.33	49.68	55.5175	46.82	40	52.58	45.87	46.3175
CSS0000112.1	CSS0000112	0	0	1.1	0	0.275	0.32	0	2.06	2.92	1.325	0.28	0	0	0.79	0.2675	1.43	0	0	0	0.3575	0	0	0	0.87	0.2175
CSS0000113.1	CSS0000113	12.61	20.84	19.33	16.95	17.4325	15.6	12.63	13.13	15.61	14.2425	15.18	15.17	14.51	16.19	15.2625	9.44	14.69	14.36	14.95	13.36	13.24	14.57	15.95	11.09	13.7125
CSS0000114.1	CSS0000114	0.14	0.14	0.04	0.04	0.09	0.08	0.22	0.08	0.25	0.1575	0.04	0.22	0.04	0.08	0.095	0.05	0.12	0	0.03	0.05	0.09	0.14	0.05	0.09	0.0925
CSS0000115.1	CSS0000115	0	1.02	1.05	5.95	2.005	0	0	0	12.34	3.085	0	0	1.14	3.59	1.1825	5.05	12.87	0	2.41	5.0825	14.99	9.02	0	0	6.0025
CSS0000116.1	CSS0000116	4.44	6.67	6.64	3.97	5.43	4.69	2.15	6.04	2.77	3.9125	5.45	5.25	5.73	5.11	5.385	1.81	5.37	3.45	5.07	3.925	7.82	5.48	3.46	7.88	6.16
CSS0000117.1	CSS0000117	22.11	24.12	19.21	22.51	21.9875	20.07	13.6	13.16	10.58	14.3525	25.65	22.51	16.15	23.81	22.03	18.75	11.67	12.66	15.25	14.5825	19.31	15.56	19.31	16.16	17.585
CSS0000118.1	CSS0000118	720.66	700.69	689.5	822.7	733.388	426.49	493.94	433.93	379	433.34	696.16	647.5	673.71	791.29	702.165	302	384.19	390.33	586.98	415.875	465.85	420.01	587.51	517.84	497.803
CSS0000119.1	CSS0000119	0.3	0	0	0	0.075	0	0	0	0	0	0	0	0	0	0	0	0	0	0	0	0	0	0	0	0
CSS0000120.1	CSS0000120	0	0	0	0	0	0	0	0	0	0	0	0	0	0	0	0	0	0	0	0	0	0	0	0	0
CSS0000121.1	CSS0000121	18.78	21.29	23.56	22.75	21.595	22.75	23.52	24.58	20.97	22.955	23.67	23.02	24.32	24.36	23.8425	28	21.13	25.44	35.42	27.4975	27.46	27.72	24.58	28.76	27.13
CSS0000122.1	CSS0000122	0	0	0	0	0	0.56	0	0	0.35	0.2275	0	0	0	0	0	0.3	0	0	0	0.075	0	0	0	0	0
CSS0000123.1	CSS0000123	0	0	0	0	0	0	0.03	0	0.03	0.015	0	0.03	0.03	0	0.015	0	0.09	0	0	0.0225	0.06	0	0.06	0	0.03
CSS0000124.1	CSS0000124	7.28	7.38	6.57	8.38	7.4025	3.91	7.17	6.78	6.32	6.045	6.72	6.69	5.44	7.54	6.5975	7.18	8.34	6.53	6.51	7.14	7.51	8.46	8.36	7.32	7.9125
CSS0000125.1	CSS0000125	0	0.21	0	0.2	0.1025	0	0.2	0	0.23	0.1075	0	0	0	0	0	0	0	0	0	0	0	0	0	0	0
CSS0000126.1	CSS0000126	20.31	21.27	23.18	21.33	21.5225	11.26	10.43	8.32	4.19	8.55	13.05	15.6	9.7	16.18	13.6325	6.99	8.11	5.4	5.75	6.5625	17.35	16.52	21.13	16.29	17.8225
CSS0000127.1	CSS0000127	4.34	3.95	4.71	2.71	3.9275	2.7	5.6	3.72	2.95	3.7425	3.96	3.98	3.01	4.29	3.81	3.4	2.57	2.7	5.87	3.635	2.31	2.87	3.54	4.9	3.405
CSS0000128.1	CSS0000128	7.57	8.13	7.67	7.84	7.8025	3.67	3.4	4.47	2.44	3.495	5.94	5.13	5.13	7.69	5.9725	3.11	4.41	3.49	4.88	3.9725	7.66	7.29	7.38	7.48	7.4525
CSS0000129.1	CSS0000129	2.72	2.09	2.9	2.37	2.52	0	0.34	0.63	0	0.2425	1.7	1.42	0.55	1.49	1.29	0.91	2.75	1.64	1.44	1.685	1.88	1.17	2.8	1.44	1.8225
CSS0000130.1	CSS0000130	118.29	122.81	168.94	110.09	130.032	148.51	115.06	142.45	113.06	129.77	144.6	136.56	156.15	152.13	147.36	115.09	133.99	143.99	234.6	156.918	157.33	151.68	156.5	162.4	156.977
CSS0000131.1	CSS0000131	3.21	3.17	0.77	2.13	2.32	0.53	2.11	2.19	2.44	1.8175	1.22	1.45	1.3	1.87	1.46	1.15	2.14	0.96	1.08	1.3325	0.13	1.35	1.93	2.79	1.55
CSS0000132.1	CSS0000132	2.68	0.69	0.98	1.87	1.555	1.46	0.33	0.69	1.16	0.91	1.19	1.62	0.53	1.22	1.14	1.46	0.66	1.59	0.7	1.1025	1.73	1.92	1.79	0.54	1.495
CSS0000133.1	CSS0000133	0	0	0	0	0	0	0	0	0.25	0.0625	0	0	0	0	0	0	0	0	0.11	0.0275	0	0	0	0	0
CSS0000134.1	CSS0000134	17.09	19.45	16.99	18.15	17.92	13.32	15.49	14.9	12.29	14	17.69	16.92	13.92	18.66	16.7975	14.59	17.01	16.34	16.92	16.215	22.99	22.14	20.93	19.25	21.3275
CSS0000135.1	CSS0000135	0	1.48	4	6.88	3.09	2.57	1.32	3.59	2.3	2.445	6.06	3.34	3.85	5.57	4.705	1.38	6.88	0.69	1.51	2.615	4.11	3.47	5.08	2.1	3.69
CSS0000136.1	CSS0000136	69.31	65.77	55.9	57.89	62.2175	17.48	18.66	13.81	9.3	14.8125	20.82	16.65	16.22	16.09	17.445	12.55	15.69	12.5	8.73	12.3675	22.88	29.2	28.41	29.44	27.4825
CSS0000137.1	CSS0000137	1.05	0.92	0.16	1.36	0.8725	1.97	0.95	0.94	0.85	1.1775	1.33	1.02	1.63	1.15	1.2825	1.06	0.4	0.9	0.5	0.715	0.7	0.98	1.54	0.94	1.04
CSS0000138.1	CSS0000138	5.39	0	3.38	2.63	2.85	0	5.75	1.76	0.97	2.12	0	0.43	0.81	3.07	1.0775	4.39	0	0.87	4.84	2.525	0.88	2.65	0	1.79	1.33
CSS0000139.1	CSS0000139	0	0	0	0	0	0	0	0	0	0	0	0	0	0	0	0	0	0	0	0	0	0	0	0	0
CSS0000140.1	CSS0000140	0	0	0	0	0	0	0	0	0	0	0	0	0	0	0	0	0	0	0	0	0	0	0	0	0
CSS0000141.1	CSS0000141	13.44	12.06	10.44	12.7	12.16	4.87	3.73	6.01	2.92	4.3825	11.01	8.69	6.79	9.34	8.9575	4.92	7.19	6.23	10.21	7.1375	12.34	14.75	12.41	12.53	13.0075
CSS0000142.1	CSS0000142	0	0	0	0	0	0	0	0	0	0	0	0	0	0	0	0	0	0	0	0	0	0	0	0	0
CSS0000143.1	CSS0000143	5.43	4.98	5.24	4.02	4.9175	3.65	1.1	2.94	1.49	2.295	2.77	2.15	1.94	1.99	2.2125	4.79	4.37	2.61	3.14	3.7275	4.32	3.44	4.67	5.31	4.435
CSS0000144.1	CSS0000144	8.97	8.5	11.51	11.1	10.02	10.07	12	19.12	11.57	13.19	9.7	5.39	14.44	7.11	9.16	6.64	11.88	15.1	10.29	10.9775	3.09	3.3	3.47	3.99	3.4625
CSS0000145.1	CSS0000145	1.87	0	0.59	0	0.615	2.29	2.36	4.27	0.69	2.4025	0	1.18	0	2.82	1	0.62	2.45	1.22	0	1.0725	1.83	2.47	3.21	2.48	2.4975
CSS0000146.1	CSS0000146	7.71	7.42	8.39	7.67	7.7975	7.66	10.27	6.78	8.19	8.225	7.86	6.9	9.98	7.88	8.155	10.45	8.73	6.83	7.4	8.3525	7.53	6.88	7.48	9.38	7.8175
CSS0000147.1	CSS0000147	0	0	0	0	0	0	0	0	0	0	0	0	0	0	0	0	0	0	0	0	0	0	0	0	0
CSS0000148.1	CSS0000148	0	0	0	0	0	0	0	0	0	0	0	0	0	0	0	0	0	0	0.16	0.04	0.15	0	0.16	0.15	0.115
CSS0000149.1	CSS0000149	0	0	0	0	0	0	0	0	0	0	0	0	0	0	0	0	0	0	0	0	0	0	0	0	0
CSS0000150.1	CSS0000150	0	0	0	0	0	0	0	0	0	0	0	0	0	0	0	0	0	0	0	0	0	0	0	0	0
CSS0000151.1	CSS0000151	1.52	0.8	4.67	2.6	2.3975	2.08	2.85	0.64	0	1.3925	1.8	1.8	3.11	3.44	2.5375	2.23	0.74	0.74	2.04	1.4375	2.22	3.37	1.18	4.16	2.7325
CSS0000152.1	CSS0000152	0	0	0	0	0	0	0	0	0	0	0	0	0	0	0	0	0	0	0	0	0	0	0	0	0
CSS0000153.1	CSS0000153	22.25	27.6	22.07	22.38	23.575	11.33	13.39	11.96	20.31	14.2475	16.61	20.9	22.54	20.65	20.175	12.79	9.71	12.59	12.67	11.94	12.47	10.7	17.65	14.07	13.7225
CSS0000154.1	CSS0000154	0	0	0.1	0.1	0.05	0.1	0	0	0	0.025	0	0	0	0	0	0.2	0	0.1	0	0.075	0	0	0.2	0	0.05
CSS0000155.1	CSS0000155	3.85	5.37	3.54	3.61	4.0925	3.78	3.88	3.23	3.47	3.59	3.34	3.56	3.06	2.54	3.125	3.04	3.87	1.84	4.28	3.2575	3.16	4.67	3.92	3.89	3.91
CSS0000156.1	CSS0000156	0.65	0.56	0.05	0.43	0.4225	0.34	0.53	0.53	0.32	0.43	0.58	0.37	0.75	0.53	0.5575	0.07	0.27	0.5	0.89	0.4325	0.37	0.07	0.63	0.11	0.295
CSS0000157.1	CSS0000157	8.79	9.14	9.2	8.8	8.9825	6.43	6.04	6.77	6.02	6.315	7.27	7.32	4.27	6.82	6.42	7.32	7.22	6.54	6.73	6.9525	7.5	8.23	8.62	8.74	8.2725
CSS0000158.1	CSS0000158	7.37	6.61	7.39	6.26	6.9075	5.56	6.63	6.72	7.13	6.51	4.83	6.12	4.95	7.89	5.9475	6.87	7.98	6.47	7.83	7.2875	8.99	8.64	7.44	9.27	8.585
CSS0000159.1	CSS0000159	84.02	74.23	85.21	74.18	79.41	90.25	79.24	74.45	89.42	83.34	82.94	78.36	79.13	80.27	80.175	72.16	75.09	81.51	82.21	77.7425	52.65	57	81.28	80.49	67.855
CSS0000160.1	CSS0000160	0.48	0	0.22	0	0.175	0	0	0.63	0.55	0.295	0	0	0.68	0	0.17	0.48	0.24	0.72	0.25	0.4225	0	0	0	0	0
CSS0000161.1	CSS0000161	0	0	0	0	0	0	0	0	0	0	0	0.5	0	0	0.125	0	0	0	0	0	0	0	0	0	0
CSS0000162.1	CSS0000162	4.06	4.55	4.69	2.89	4.0475	1.63	2.02	2.5	1.81	1.99	4.66	2.84	2.34	4.08	3.48	2.63	2.4	1.46	3.49	2.495	4.76	3.72	4.68	4.41	4.3925
CSS0000163.1	CSS0000163	0	0	0	0	0	0	0	0	0	0	0	0	0	0	0	0	0	0	0	0	0	0	0	0	0
CSS0000164.1	CSS0000164	5.37	6.36	6.27	5.22	5.805	7.76	6.99	6.01	8.09	7.2125	10.03	10.16	11.09	11.42	10.675	9.4	7.04	8.94	7.29	8.1675	6.97	7.47	8.77	6.23	7.36
CSS0000165.1	CSS0000165	1.5	1.1	0.41	0	0.7525	0.99	0.83	0.19	2.68	1.1725	2.26	0.62	1.21	2.59	1.67	0.21	0.42	0.86	1.12	0.6525	0	0.64	0.86	0.63	0.5325
CSS0000166.1	CSS0000166	2.73	2.92	2.66	0.72	2.2575	1.31	2.29	2.79	2	2.0975	0.68	1.34	1.35	0.8	1.0425	2.09	0.83	0	0.61	0.8825	2	3.21	1.09	0.7	1.75
CSS0000167.1	CSS0000167	17.02	15.43	21.85	17.93	18.0575	15.26	15.51	16.05	15.06	15.47	17.88	16.77	17.78	18.56	17.7475	15.39	15.85	13.3	17.24	15.445	19.47	23.09	17.53	15.25	18.835
CSS0000168.1	CSS0000168	18.07	16.91	13.36	9.05	14.3475	21.68	7.31	11.05	7.78	11.955	46.46	31.49	20.92	38.5	34.3425	23.75	13.06	9.22	12.39	14.605	22.18	16.45	15.25	10.51	16.0975
CSS0000169.1	CSS0000169	0	0	0	0	0	0	0	0	0	0	0	0	0	0	0	0	0	0	0	0	0	0	0	0	0
CSS0000170.1	CSS0000170	0.57	0.39	0.19	0	0.2875	0.18	0.19	0.17	0	0.135	0	0.18	0	0.21	0.0975	0	0.38	0	0	0.095	0.37	0.19	0	0	0.14
CSS0000171.1	CSS0000171	2.32	2.41	1.77	0.45	1.7375	2.19	2.21	0.86	1.08	1.585	3.97	3.1	1.32	2.05	2.61	0.5	0.91	1.75	4.43	1.8975	1.45	2.31	0.94	1.43	1.5325
CSS0000172.1	CSS0000172	0.21	0.28	0.28	0.38	0.2875	0.07	0.06	0	0.02	0.0375	0.07	0.19	0.04	0	0.075	0.04	0	0.2	0.24	0.12	0.34	0.41	0.54	0.3	0.3975
CSS0000173.1	CSS0000173	0	0	0	0	0	0	0	0	0	0	0	0	0	0	0	0	0	0	0	0	0	0	0	0	0
CSS0000174.1	CSS0000174	5.9	6.1	7.17	7.34	6.6275	4.29	5.3	5.76	3.23	4.645	5.27	6.13	4.45	6.4	5.5625	4.25	6.76	4.53	5.71	5.3125	7.31	6.72	7.42	6.7	7.0375
CSS0000175.1	CSS0000175	2.4	2.5	0.98	2.86	2.185	1.74	0.81	1.05	1.18	1.195	1.55	1.72	2.15	1.32	1.685	1.87	1.3	1.16	0.89	1.305	1.42	1.97	2.25	1.78	1.855
CSS0000176.1	CSS0000176	173.13	182.71	185.57	179.4	180.203	174.55	162.12	185.2	163.26	171.282	203.46	164.33	169.82	160.83	174.61	156.82	186.09	192.52	201.07	184.125	226.22	192.33	173.4	185.22	194.293
CSS0000177.1	CSS0000177	0	0.12	0.56	0	0.17	0	0	0	0	0	0	0	0	0	0	0	0	0	0	0	0	0	0	0.11	0.0275
CSS0000178.1	CSS0000178	36.39	46.58	43.28	38.01	41.065	30.83	26.67	39.3	13.93	27.6825	32.36	27.84	27.24	31.67	29.7775	20.96	32.59	29.58	29.44	28.1425	24.05	30.01	21.77	29.94	26.4425
CSS0000179.1	CSS0000179	0.47	0.98	1.35	0.93	0.9325	3.9	2.7	4.48	6.29	4.3425	2.7	3.15	2.62	4.22	3.1725	5.6	3.24	1.86	4.51	3.8025	3.67	5.16	6.27	4.2	4.825
CSS0000180.1	CSS0000180	0	0	0.14	0.16	0.075	0.12	0	0	0.08	0.05	0	0	0.05	0.13	0.045	0	0	0	0	0	0.18	0	0	0	0.045
CSS0000181.1	CSS0000181	24.26	14.36	21.97	30.8	22.8475	82.77	42.37	58.68	135.33	79.7875	40.84	35.34	25.44	31.35	33.2425	85.4	71.18	77.79	31.18	66.3875	7.51	10.32	10.26	8.9	9.2475
CSS0000182.1	CSS0000182	16.91	15.87	13.12	14.31	15.0525	10.06	13.61	8.92	10.95	10.885	12.55	11.01	9.06	13.55	11.5425	11.23	11.83	11.39	11.05	11.375	10.91	13.19	13.29	9.29	11.67
CSS0000183.1	CSS0000183	0.67	0.55	0.47	0.38	0.5175	0.14	0.35	0.3	1.2	0.4975	0.07	0.19	0.07	0.14	0.1175	0.07	0	0	0.09	0.04	0.13	0.07	0.2	0.31	0.1775
CSS0000184.2	CSS0000184	0.79	1.14	0.66	0.46	0.7625	0.84	1.05	0.3	0.98	0.7925	0.37	0.41	0.25	0.37	0.35	1.26	0.97	1.04	0.57	0.96	0.58	0.65	0.43	0.36	0.505
CSS0000185.1	CSS0000185	128.82	144.13	120.78	129.65	130.845	55.03	44.23	35.15	42.91	44.33	37.94	45.78	28.53	42.44	38.6725	79.1	61.48	41.04	27.43	52.2625	64.7	73.94	62.08	58.87	64.8975
CSS0000186.1	CSS0000186	4.62	6.96	5.79	5.61	5.745	4.2	5.52	4.8	5.51	5.0075	6.21	6.09	4.09	4.38	5.1925	7.46	6.5	5.42	5.4	6.195	6.49	7.94	4.62	6.78	6.4575
CSS0000187.1	CSS0000187	0.15	0.22	0.21	0.22	0.2	0.07	0.07	0.26	0.08	0.12	0.07	0.14	0.35	0.32	0.22	0.07	0.22	0	0.53	0.205	0.07	0.59	0.15	0.21	0.255
CSS0000188.1	CSS0000188	0	0.37	0	0	0.0925	0	0.38	0.13	0.04	0.1375	0.31	0.28	0	0.15	0.185	0.16	0	0.07	0.4	0.1575	0	0.17	0.1	0.51	0.195
CSS0000189.1	CSS0000189	0.12	0	0.06	0.06	0.06	0.11	0.12	0.05	0.07	0.0875	0	0	0.06	0.13	0.0475	0.06	0	0	0	0.015	0.06	0.18	0.06	0	0.075
CSS0000190.1	CSS0000190	0.76	0	0.73	2.25	0.935	3.62	2.17	0.33	3.43	2.3875	0	0.73	0.36	2.13	0.805	1.9	1.5	3.03	0	1.6075	0.73	1.14	0	0.38	0.5625
CSS0000191.1	CSS0000191	0	0	178.12	0	44.53	0	34.97	92.87	0	31.96	37.31	38.12	33.88	0	27.3275	0	153.77	0	0	38.4425	78.83	0	0	40.72	29.8875
CSS0000192.1	CSS0000192	0	0	0	0	0	0	0	0	0	0	0	0	0	0	0	0	0	0	0	0	0	0	0	0	0
CSS0000193.1	CSS0000193	0	0	0	0	0	0	0	0.2	0	0.05	0	0	0	0	0	0.23	0.23	0	0.24	0.175	0	0	0.47	0	0.1175
CSS0000194.1	CSS0000194	1.34	5.6	3.85	1.32	3.0275	0.41	0	3.48	1	1.2225	2.99	1.71	0.41	1	1.5275	0	1.76	3.54	5.23	2.6325	4.36	3.57	1.83	3.54	3.325
CSS0000195.1	CSS0000195	0	0	0	0	0	0	0	0	0	0	0	0	0	0	0	0	0	0	0	0	0	0	0	0	0
CSS0000196.1	CSS0000196	15.39	14.68	13.79	14.54	14.6	12.65	11.47	11.23	13.47	12.205	18.99	13.89	16.06	15.71	16.1625	11.26	14.26	11.9	15.56	13.245	13.31	12.57	16.33	13.45	13.915
CSS0000197.1	CSS0000197	0	0.07	0	0.07	0.035	0	0.06	0.06	0.08	0.05	0	0	0.07	0	0.0175	0	0	0	0	0	0	0	0	0	0
CSS0000198.1	CSS0000198	4.42	4.17	4.83	3.28	4.175	4.12	4.67	3.84	5.85	4.62	6.63	6.1	5.61	3.94	5.57	4.16	4.53	4.66	5.99	4.835	7.41	5.37	5.33	6.9	6.2525
CSS0000199.1	CSS0000199	0.33	0.11	0	0	0.11	0	0	0.2	0	0.05	0.11	0.11	0	0	0.055	0.11	0	0	0.35	0.115	0.21	0	0	0	0.0525
CSS0000200.1	CSS0000200	0	0	0	0	0	0	0	0	0	0	0	0	0	0	0	0	0	0	0	0	0	0	0	0	0
CSS0000201.1	CSS0000201	0.35	0	0	0.34	0.1725	0	0	0	0	0	0.34	0	0	0	0.085	0	0	0	0	0	0	0	0	0	0
CSS0000202.1	CSS0000202	0	0	0	0	0	0	0	0	0	0	0	0	0	0	0	0	0	0	0	0	0.37	0	0	0	0.0925
CSS0000203.1	CSS0000203	0	0	0	0	0	0	0.38	0.34	0	0.18	0	0	0	0.2	0.05	0	0	0	0	0	0	0	0.08	0	0.02
CSS0000204.1	CSS0000204	3.43	2.9	2.55	4.06	3.235	1.77	2.98	3	2.54	2.5725	1.88	2.53	1.91	2.56	2.22	3.13	2.56	2.88	2.67	2.81	2.63	2.87	3.36	2.3	2.79
CSS0000205.1	CSS0000205	78.62	73.91	81.58	63.44	74.3875	47.09	46.79	64.64	40.14	49.665	52.77	52.73	46.77	47.63	49.975	54.4	51.28	47.64	59.05	53.0925	73.99	60.5	61.41	66.34	65.56
CSS0000206.1	CSS0000206	23.85	27.96	18.75	20.86	22.855	12.98	12.03	14.65	17.15	14.2025	12.53	12.43	12.42	12.6	12.495	10.07	14.23	14.61	21.17	15.02	13.3	17.34	20.2	17.12	16.99
CSS0000207.1	CSS0000207	38.05	36.86	34.04	36.39	36.335	45.27	43.76	35.47	41.71	41.5525	42.87	37.86	34.06	42.78	39.3925	52.14	48.65	43.45	38.18	45.605	36.86	39.64	34.8	37	37.075
CSS0000208.1	CSS0000208	2.73	2.68	2.88	2.8	2.7725	1.33	2.2	2.31	3.01	2.2125	2.75	2.18	1.7	2.47	2.275	2.73	1.87	1.92	4.44	2.74	3.21	0.84	2.38	2.76	2.2975
CSS0000209.1	CSS0000209	7.21	7.58	7.57	13.31	8.9175	5.84	11.27	2.03	5.21	6.0875	7.59	8.36	5.82	8.18	7.4875	5.5	5.48	4.66	2.59	4.5575	8.6	4.73	5.8	0.8	4.9825
CSS0000210.1	CSS0000210	5.46	3.19	3.9	3.97	4.13	7.04	9.19	4.79	9.2	7.555	5.94	7.53	5.15	5.5	6.03	3.31	7.71	6.19	6.72	5.9825	1.84	2.86	3.84	3.02	2.89
CSS0000211.1	CSS0000211	13.37	15.7	15.85	11.9	14.205	12.46	11.02	10.93	13.98	12.0975	13.98	8.56	15.12	10.83	12.1225	9.45	10.83	13.29	12.95	11.63	10.25	11.15	13.74	10.53	11.4175
CSS0000212.1	CSS0000212	54.07	51.8	48.76	57.84	53.1175	60.29	70.94	59.89	70.36	65.37	56.92	72.21	62.53	68.34	65	64.47	71.28	70.82	55.27	65.46	48.37	59.52	55.76	45.77	52.355
CSS0000213.1	CSS0000213	0	0	0	0	0	0	0	0	0	0	0	0	0	0	0	0	0	0	0	0	0	0	0	0	0
CSS0000214.1	CSS0000214	6.53	6.72	7.63	6.1	6.745	5.13	5.52	6.1	4.69	5.36	5.8	5.48	6.68	5.94	5.975	5.84	6.43	6.18	8.24	6.6725	9.88	8.76	8.09	8.22	8.7375
CSS0000215.1	CSS0000215	13.95	11.18	6.47	0	7.9	54.93	20.7	21.46	54.53	37.905	49.03	67.35	50.72	38.53	51.4075	52.16	52.52	27.98	5.72	34.595	13.64	5.06	7.34	5.25	7.8225
CSS0000216.1	CSS0000216	0	0	0	0	0	0	0	0	0	0	0	0	0	0	0	0	0	0	0	0	0	0	0	0	0
CSS0000217.1	CSS0000217	0.2	0.15	0.08	0.22	0.1625	0.03	0.2	0.1	0.37	0.175	0.06	0.1	0.26	0.3	0.18	0.03	0.16	0.03	0.1	0.08	0.09	0.04	0.24	0.06	0.1075
CSS0000218.1	CSS0000218	12.78	16.26	11.63	17.01	14.42	7.64	11.02	5.31	6.67	7.66	7.2	5.29	10.99	12.08	8.89	4.39	10.03	8.39	4.25	6.765	8.9	21.12	9.56	11.48	12.765
CSS0000219.1	CSS0000219	4.01	4.12	6.54	3.24	4.4775	23.6	13.85	8.49	19.5	16.36	5.48	6.88	4.36	6.1	5.705	29.91	10.38	12.57	3.54	14.1	3.37	2.66	2.76	5.6	3.5975
CSS0000220.1	CSS0000220	0	0	0	0	0	0	0	0	0	0	0	0.38	0	0	0.095	0	0	0	0	0	0	0	0.8	0	0.2
CSS0000221.1	CSS0000221	4.42	2.44	7.67	4.64	4.7925	7.09	2.27	1.8	1.33	3.1225	3.96	6.79	2.77	4.57	4.5225	2.35	2.9	3.24	5.27	3.44	3.15	6.2	3.59	4.34	4.32
CSS0000222.1	CSS0000222	0	0	0	0	0	0	0	0	0	0	0	0	0	0	0	0	0	0	0	0	0	0	0	0	0
CSS0000223.1	CSS0000223	0.75	0.16	0	0.16	0.2675	0	0	0.05	0	0.0125	0	0	0	0.06	0.015	0	0	0	0.05	0.0125	0.08	0.24	0	0	0.08
CSS0000224.1	CSS0000224	10.81	10.53	10.99	11.86	11.0475	1.95	0.74	1.18	0	0.9675	1.47	1.37	1.18	1.04	1.265	0.19	4.3	2.02	0.89	1.85	3.3	5.07	1.81	3.13	3.3275
CSS0000225.1	CSS0000225	1.41	0	1.89	0.05	0.8375	0	0	0.2	0.4	0.15	0	0.24	0	0.52	0.19	0	0	0.56	0	0.14	0	0.91	0.67	0	0.395
CSS0000226.1	CSS0000226	0	0	0	0	0	0	0	0	0	0	0	0	0	0	0	0	0	0	0	0	0.33	0	0	0	0.0825
CSS0000227.1	CSS0000227	0	0	0	0	0	0	0	0	0	0	0	0	0	0	0	0	0	0	0	0	0	0	0	0	0
CSS0000228.1	CSS0000228	5.32	4.42	2.91	3.22	3.9675	2.21	2.08	2.65	2.16	2.275	3.24	2.24	1.71	2.52	2.4275	3.52	2.01	2.06	5.44	3.2575	2.87	3.1	2.95	2.91	2.9575
CSS0000229.1	CSS0000229	1.27	0	0	0.68	0.4875	0	0.45	0.51	0.54	0.375	0.56	0.78	0	0.13	0.3675	0.35	0.57	0.23	0.48	0.4075	0	0	0	0.45	0.1125
CSS0000230.1	CSS0000230	0.34	0.62	0.65	0.26	0.4675	0.88	0.46	0.42	1.17	0.7325	0.32	0.45	0.39	0.22	0.345	1.48	0	0.34	0.21	0.5075	0.13	0.41	0.4	0.45	0.3475
CSS0000231.1	CSS0000231	1.81	3.58	5	3.3	3.4225	1.23	2.01	2.16	1.29	1.6725	3.23	2.8	2.09	2.88	2.75	1.53	1.79	1.94	2.29	1.8875	3.17	1.58	4.43	3.99	3.2925
CSS0000232.1	CSS0000232	1.91	2.87	2.45	2.32	2.3875	1.82	1.79	2.03	1.51	1.7875	1.38	1.57	1.72	2.16	1.7075	1.43	2.2	1.65	1.51	1.6975	2.94	2.5	2.35	2.35	2.535
CSS0000233.1	CSS0000233	0	0	0	0	0	0	0	0.1	0.38	0.12	0	0	0.11	0	0.0275	0	0	0	0.34	0.085	0	0	0.22	0	0.055
CSS0000234.1	CSS0000234	3.86	0	3.24	4.93	3.0075	10.7	5.95	6.83	7.24	7.68	7.81	5.65	6.07	3.39	5.73	13.72	7.86	7.51	5.7	8.6975	2.48	3.93	4.38	1.01	2.95
CSS0000235.1	CSS0000235	35.75	47.12	69.24	36.99	47.275	19.56	11.8	56.14	15.36	25.715	18.81	24.12	22.48	9.09	18.625	13.96	26.9	17.96	39.66	24.62	50.05	39.1	50.91	69.59	52.4125
CSS0000236.1	CSS0000236	0.52	0.54	0.4	0.84	0.575	0.59	1.19	0.45	0.67	0.725	0.62	0.32	0.71	0.83	0.62	0.43	0.74	0.36	0.49	0.505	0.6	0.87	0.37	1.15	0.7475
CSS0000237.1	CSS0000237	27.9	31.04	29.13	34.06	30.5325	26.63	27.99	23.97	23.39	25.495	30.45	26.08	29.77	36.99	30.8225	21.25	27.67	26.71	28	25.9075	31.94	31.97	33.19	27.57	31.1675
CSS0000238.1	CSS0000238	0	0	0.96	0	0.24	0	0.95	0	0	0.2375	0	0	0.91	1.16	0.5175	0	0	0	2.2	0.55	1.99	1.99	0	0	0.995
CSS0000239.1	CSS0000239	12.45	13.52	8.87	12.12	11.74	9.99	11.3	9.85	8.31	9.8625	10.38	9.82	9.92	12.13	10.5625	11.63	11.61	11.84	10.21	11.3225	13.42	13.94	13.34	10.17	12.7175
CSS0000240.1	CSS0000240	46.47	36.45	33.61	37.12	38.4125	30.84	39.57	30.74	31.31	33.115	27.51	33.15	35.18	35.96	32.95	30.07	37.92	27.71	35.44	32.785	35.22	31.44	38.52	36.15	35.3325
CSS0000241.1	CSS0000241	0	0	0	0	0	0	0	0	0	0	0	0	0	0	0	0	0.28	0	0	0.07	0	0	0	0	0
CSS0000242.1	CSS0000242	3.21	2.41	3.04	1.58	2.56	2.5	0.77	1.05	0.3	1.155	1.68	0.85	2.4	2.33	1.815	1.2	3.68	1.11	5.63	2.905	0.77	1.64	1.7	0.63	1.185
CSS0000243.1	CSS0000243	0	0	0	0	0	0	0	0	0	0	0	0	0	0	0	0	0	0	0	0	0	0	0	0	0
CSS0000244.1	CSS0000244	0.05	0.1	0.05	0.09	0.0725	0	0.05	0	0	0.0125	0.05	0.09	0.09	0	0.0575	0.05	0.05	0	0.14	0.06	0.05	0	0.14	0	0.0475
CSS0000245.1	CSS0000245	10.63	11.65	10.49	9.97	10.685	9.16	9.64	11.51	10.83	10.285	11.31	11.68	11.62	13.42	12.0075	9.04	9.81	10.61	9.09	9.6375	11.47	9.19	10.29	7.94	9.7225
CSS0000246.1	CSS0000246	28.99	36.63	34.93	36.62	34.2925	46.54	35.62	41.35	45.8	42.3275	43.15	44.19	44.87	41.51	43.43	45.82	47.4	39.61	53.47	46.575	40.41	28.89	39.16	42.73	37.7975
CSS0000247.1	CSS0000247	18.21	21.42	20.88	18.58	19.7725	19.19	15.03	16.46	18.77	17.3625	16.5	14.01	11.92	11.73	13.54	23.04	21.27	20.43	15.62	20.09	16.25	18.7	15.23	19.04	17.305
CSS0000248.1	CSS0000248	63.69	60.98	58.52	61.41	61.15	50.12	50.09	47.37	49.1	49.17	54.24	47.45	46.35	47.51	48.8875	47.45	49.78	53.14	40.42	47.6975	49.88	56.14	53.26	50.18	52.365
CSS0000249.1	CSS0000249	13.38	16.59	11.43	13.38	13.695	14.06	11.66	14.11	10.94	12.6925	13.31	11.8	13.06	17.93	14.025	14.9	12.07	16.56	18.68	15.5525	17.07	10.75	17.33	14.17	14.83
CSS0000250.1	CSS0000250	0	0	0	0	0	0	0	0	0	0	0	0	0	0	0	0	0	0	0	0	0	0	0	0	0
CSS0000251.1	CSS0000251	6.54	8.75	10.41	5.31	7.7525	6.7	2.56	5.23	1.93	4.105	7.62	7.32	5.52	7.23	6.9225	5.37	5.6	2.64	8.44	5.5125	11.06	6.03	9.1	5.68	7.9675
CSS0000252.1	CSS0000252	2.78	2.35	2.19	2.91	2.5575	1.61	2.29	1.09	1.8	1.6975	1.84	1.47	0.8	1.5	1.4025	2.06	1.1	1.59	1.25	1.5	1.44	1.85	1.22	2.12	1.6575
CSS0000253.1	CSS0000253	54.17	54.97	52.87	56.13	54.535	47.63	61.21	44.42	45.61	49.7175	52.52	59.42	51.67	63.15	56.69	52.21	45.87	48.02	58.11	51.0525	50.71	55.53	60	53.4	54.91
CSS0000254.1	CSS0000254	0.44	1.04	0.81	0.93	0.805	0.35	0.77	0.68	0.7	0.625	0.44	0.73	0.68	0.47	0.58	0.29	0.43	0.37	0.21	0.325	0.87	0.26	0.62	0.86	0.6525
CSS0000255.1	CSS0000255	0	0	0	0	0	0	0	0	0	0	0	0	0	0	0	0	0	0	0	0	0	0	0	0	0
CSS0000256.1	CSS0000256	22.24	15.6	18.9	18.46	18.8	4.5	4.28	13.65	4.41	6.71	14.44	11.07	12.44	14.5	13.1125	7.2	10.07	6.48	12.96	9.1775	22.81	18.36	21.63	23.44	21.56
CSS0000257.1	CSS0000257	2.7	2.88	2.31	2.11	2.5	1.05	1.57	0.8	0.77	1.0475	1.6	1.39	1.15	2.24	1.595	1.84	1.34	1.24	1.01	1.3575	1.6	1.91	2.24	2.24	1.9975
CSS0000258.1	CSS0000258	0.05	0.05	0.05	0.1	0.0625	0.02	0.15	0.07	0	0.06	0.06	0.02	0	0.03	0.0275	0.15	0.1	0	0	0.0625	0	0	0.03	0.02	0.0125
CSS0000259.1	CSS0000259	10.5	11.01	9.83	11.38	10.68	8.81	10.84	9.11	8.1	9.215	11.08	9.49	8.52	10.33	9.855	8.23	9.02	8.16	8.72	8.5325	10.73	10.33	11.74	10.79	10.8975
CSS0000260.1	CSS0000260	268.83	262.12	244.75	207.58	245.82	468.02	356.4	300.79	377.43	375.66	306.33	301.6	262.34	289.8	290.017	583.77	428.42	414.15	267.03	423.343	306.03	376.63	276.72	312.48	317.965
CSS0000261.1	CSS0000261	0	0	0	0	0	0	0	0	1.24	0.31	0	1.1	0	0	0.275	0	0	0	0	0	0	0	0	0	0
CSS0000262.1	CSS0000262	10.47	13	10.71	9.41	10.8975	9.7	9.66	9.83	8.26	9.3625	10.6	9.9	6.26	9.48	9.06	10.28	10.42	7.96	9.88	9.635	10.2	10.02	8.99	10.65	9.965
CSS0000263.1	CSS0000263	0	0	0	0	0	0	0	0	0	0	0	0	0	0	0	0	0	0	0	0	0	0	0	0	0
CSS0000264.1	CSS0000264	5.23	4.9	12.98	4.45	6.89	60.51	53.46	26.69	57.55	49.5525	15.1	24.09	17.83	19.15	19.0425	99.4	42.93	29.77	20.39	48.1225	5.34	6.46	8.31	6.27	6.595
CSS0000265.1	CSS0000265	0	0	0	0	0	0	0	0	0	0	0	0	0	0	0	0	0	0	0	0	0	0	0	0	0
CSS0000266.1	CSS0000266	5.88	0	5.23	0	2.7775	0	0	9.11	0	2.2775	0	11.02	4.93	0	3.9875	0	5.62	10.62	6.66	5.725	0	5.49	6.41	11.81	5.9275
CSS0000267.1	CSS0000267	7.96	7.1	8.87	6.88	7.7025	7.71	6.8	8.03	5.97	7.1275	9.17	6.87	8.45	5.45	7.485	5.42	6.61	8.21	11.67	7.9775	7.05	5.4	9.22	7.04	7.1775
CSS0000268.1	CSS0000268	0.14	0.35	0.13	0	0.155	0.38	0.13	0.18	0.48	0.2925	0.07	0.07	0.07	0	0.0525	0.21	0.27	0.21	0.28	0.2425	0.2	0.21	0.14	0.59	0.285
CSS0000269.1	CSS0000269	0	0	0	0	0	0	0	0	0	0	0	0	0.86	0	0.215	0	0	0.92	0	0.23	0	0	0	0	0
CSS0000270.2	CSS0000270	32.63	23.62	27.72	33.42	29.3475	26.36	33.73	25.26	36.87	30.555	18.32	24.08	31.09	22.39	23.97	20.28	27.6	34.58	20.43	25.7225	27.26	17.95	30.32	27.14	25.6675
CSS0000271.1	CSS0000271	7.5	5.12	4.11	4.98	5.4275	7.77	5.68	6.21	4.46	6.03	9.37	8.54	6.69	13.28	9.47	5.94	6.12	7.4	6.35	6.4525	4.55	3.95	3.14	3.25	3.7225
CSS0000272.1	CSS0000272	0	0	0	0	0	0	0	0	0	0	0	0	0	0	0	0	0	0	0	0	0	0	0	0	0
CSS0000273.1	CSS0000273	0.47	0.7	0.08	0.42	0.4175	0	0.08	0.11	0	0.0475	0.25	0.46	0.04	0.19	0.235	0.26	0.13	0.04	0.18	0.1525	0.41	0.43	0.77	0.74	0.5875
CSS0000274.1	CSS0000274	0.16	0.17	0	0.63	0.24	0	0.16	0	0.37	0.1325	0	0.31	0.46	0.35	0.28	0.32	0.63	0.32	1	0.5675	0.17	0.32	0	0.47	0.24
CSS0000275.1	CSS0000275	2.95	2.37	2.82	3.56	2.925	3.26	1.68	1.55	1.21	1.925	1.81	3.17	1.3	1.19	1.8675	2.71	2.37	1.36	2.55	2.2475	2.03	2.85	1.65	2.45	2.245
CSS0000276.1	CSS0000276	0	0	0	0	0	0	0	0	0	0	0	0	0	0	0	0	0	0	0	0	0	0	0	0	0
CSS0000277.1	CSS0000277	23.05	29.02	21.74	21.7	23.8775	17.31	11.06	7.92	4.66	10.2375	18.75	15.25	11.9	17.84	15.935	11.1	10.14	9.82	10.63	10.4225	11.09	18.83	15.5	18.61	16.0075
CSS0000278.1	CSS0000278	40.77	45.56	39.85	48.84	43.755	42.99	30.74	29.07	39.53	35.5825	40.74	38.12	29.71	33.12	35.4225	38.45	33.2	44.82	26.94	35.8525	33.53	32.76	33.07	41.04	35.1
CSS0000279.1	CSS0000279	0	0.88	1.02	0	0.475	0.71	0	0	1.4	0.5275	0.4	0.4	0	0	0.2	0	0	0.41	0.54	0.2375	0.82	0	0.43	0	0.3125
CSS0000280.1	CSS0000280	13.78	8.31	9.25	8.19	9.8825	12.44	5.86	7.55	10.13	8.995	9.53	7.07	5.7	7.82	7.53	7.33	8.82	9.26	11.49	9.225	7.47	6.09	5.53	8.51	6.9
CSS0000281.1	CSS0000281	273.48	282.69	314.49	252.1	280.69	242.4	193.6	216.61	176.51	207.28	264.99	220.71	217.46	249.24	238.1	257.68	249.79	229.66	316.55	263.42	328.37	284.94	259.12	283.74	289.043
CSS0000282.1	CSS0000282	0	0	0	0	0	0	0	0	0	0	0	0	0	0	0	0	0	0	0	0	0	0	0	0	0
CSS0000283.1	CSS0000283	1.03	1.37	1.41	1.16	1.2425	0.93	1.31	0.92	0.36	0.88	1.07	1.07	0.51	1.08	0.9325	0.84	0.45	0.78	1.34	0.8525	1.51	1.39	1.33	1.51	1.435
CSS0000284.1	CSS0000284	0	0	0	0	0	0	0	0	0	0	0	0	0	0	0	0	0	0	0	0	0	0	0	0	0
CSS0000285.1	CSS0000285	3.85	1.77	6.82	2.52	3.74	16.06	10.35	6.95	20.99	13.5875	4.53	6.58	3.64	2.59	4.335	27.51	15.35	17.6	1.57	15.5075	1.45	1.07	1.72	2.92	1.79
CSS0000286.1	CSS0000286	0.11	0.23	0	0.11	0.1125	0.21	0	0.2	0.52	0.2325	0.11	0.22	0	0.12	0.1125	0	0.22	0	0.12	0.085	0	0.11	0.11	0	0.055
CSS0000287.1	CSS0000287	0.54	0.73	1	0.93	0.8	0.48	0.73	0.68	0.62	0.6275	0.45	0.94	0.61	0.64	0.66	0.64	0.55	0.52	0.61	0.58	0.62	0.77	0.84	0.54	0.6925
CSS0000288.1	CSS0000288	6.41	6.62	6.79	8.08	6.975	5.76	5.83	4.94	4.12	5.1625	6.37	4.63	6.83	5.51	5.835	3.8	5.13	4.23	6.49	4.9125	4.85	3.62	6.66	5.28	5.1025
CSS0000289.1	CSS0000289	2.68	2.54	3.6	2.17	2.7475	2.21	2.32	2.29	1.34	2.04	2.85	1.8	2.05	2.03	2.1825	1.77	1.44	1.69	2.03	1.7325	2.94	2.87	2.44	2.75	2.75
CSS0000290.1	CSS0000290	1.29	1.87	1.44	2.11	1.6775	1.16	1.93	1.48	1.36	1.4825	0.55	0.77	1.02	1.2	0.885	0.25	0.21	0.16	0.43	0.2625	0.8	0.21	1.38	1.32	0.9275
CSS0000291.1	CSS0000291	0	0	0	0	0	0	0	0	0	0	0.12	0	0	0.28	0.1	0	0.13	0.13	0	0.065	0	0	0	0.13	0.0325
CSS0000292.1	CSS0000292	0	0	0	0	0	0	0	0	0	0	0	0	0	0	0	0	0	0	0	0	0	0	0	0	0
CSS0000293.1	CSS0000293	21.76	18.88	16.31	20.83	19.445	6.99	5.48	7.96	3.34	5.9425	15.77	10.45	14.04	13.65	13.4775	5.58	7.03	4.26	11.69	7.14	24.27	22.39	20.05	21.76	22.1175
CSS0000294.1	CSS0000294	198.5	194.13	190.76	169.21	188.15	209.93	193.98	195.4	193.15	198.115	225.8	176.57	213.15	189.66	201.295	194.39	198.01	212.44	208.57	203.352	215.33	224.72	168.21	190.13	199.597
CSS0000295.1	CSS0000295	0	0	0	0	0	0	0	0	0	0	0	0	0	0	0	0	0	0	0	0	0	0	0	0.43	0.1075
CSS0000296.1	CSS0000296	1.13	1.16	1.23	1.08	1.15	0.75	1.52	0.95	1.26	1.12	1.47	0.95	1.13	1.55	1.275	1.46	1.26	1.5	2.27	1.6225	1.4	0.85	1.52	1.9	1.4175
CSS0000297.1	CSS0000297	98.38	115.99	93.32	103.97	102.915	72.9	93.91	91.94	67.79	81.635	85.17	87.64	89.29	107	92.275	67.45	85.23	75.67	111.05	84.85	117.93	118.11	103.77	124.54	116.088
CSS0000298.1	CSS0000298	0	0	0.21	0	0.0525	0	0.42	0	0.5	0.23	0	0	0	0	0	0.22	0	0	0	0.055	0.21	0	0	0	0.0525
CSS0000299.1	CSS0000299	51.57	57.07	41.28	51.55	50.3675	44.1	38.14	26.77	29.52	34.6325	50.22	31.36	37.89	45.18	41.1625	57.92	39.23	35.57	20.14	38.215	26.99	41.44	23.38	26.22	29.5075
CSS0000300.1	CSS0000300	29.56	97.8	183.48	137.6	112.11	157.19	281.78	421.86	338.55	299.845	136.27	263.13	383.49	160.68	235.892	138.26	380.89	306.38	319.01	286.135	360.37	220.49	242.32	296.77	279.988
CSS0000301.1	CSS0000301	12.07	13.27	13.19	11.88	12.6025	6.5	4.09	7.63	2.33	5.1375	12.2	9.05	5.93	7.17	8.5875	6.13	8.46	7.93	17.16	9.92	21.97	19.77	16.1	14.3	18.035
CSS0000302.1	CSS0000302	0	0	0	0	0	0	0	0	0	0	0	0	0	0	0	0	0	0	0	0	0	0	0	0	0
CSS0000303.1	CSS0000303	27.88	28.27	26.76	29.76	28.1675	18.33	28.07	24.16	23.42	23.495	23.03	21.83	26.31	22.81	23.495	19.04	20.2	24.62	24.81	22.1675	22.29	24.42	29.35	27.66	25.93
CSS0000304.1	CSS0000304	32.82	36.76	27.54	31.75	32.2175	19.24	26.1	26.21	19.22	22.6925	25.64	23.23	23.8	27.71	25.095	24.6	28.18	27.3	22.59	25.6675	30.45	35.64	28.88	31.42	31.5975
CSS0000305.1	CSS0000305	10.7	11.72	8.96	12.78	11.04	8.59	6.21	5.46	4.8	6.265	8.35	6.55	5.88	9.72	7.625	7.94	5.55	6.52	4.8	6.2025	7.85	7.42	8.21	6.49	7.4925
CSS0000306.1	CSS0000306	0	0.12	0	0.24	0.09	0.05	0.13	0	0.21	0.0975	0.06	0.01	0	0	0.0175	0	0.06	0	0	0.015	0	0	0	0	0
CSS0000307.1	CSS0000307	0	0	0	0	0	0	0	0	0	0	0	0	0	0	0	0	0	0	0	0	0	0	0	0	0
CSS0000308.1	CSS0000308	0.18	0.29	0	0.18	0.1625	0.09	0.09	0.16	0.11	0.1125	0	0.18	0.09	0	0.0675	0.09	0	0.37	0	0.115	0	0.28	0.19	0.18	0.1625
CSS0000309.1	CSS0000309	11.3	8.25	10.72	12.67	10.735	11.01	13.19	9.77	15.15	12.28	13.2	9.51	12.02	10.5	11.3075	8.81	9.58	9.69	12.85	10.2325	11.82	11.39	10.42	16.47	12.525
CSS0000310.1	CSS0000310	0.84	0.25	0.74	1.97	0.95	0.53	1.68	2.13	1.05	1.3475	0.63	0.86	0.81	1.18	0.87	0.71	0.71	1.27	1.82	1.1275	0.9	1.02	1.38	2.7	1.5
CSS0000311.1	CSS0000311	0	5.58	0	0	1.395	0	0	0	0	0	0	0	0	0	0	0	0	0	0	0	0	0	0	0	0
CSS0000312.1	CSS0000312	9.5	16.67	14.56	17.56	14.5725	10.82	26.43	22.99	29.88	22.53	15.68	22.8	27.34	19.28	21.275	10.77	16.82	17.11	26.38	17.77	23.55	15.3	29.5	25.57	23.48
CSS0000313.1	CSS0000313	2.33	0	0	0	0.5825	46.42	34.53	13.6	69.46	41.0025	5.49	33.04	18.77	13.38	17.67	114.49	64.75	50.2	5.06	58.625	3.41	0	4.86	0	2.0675
CSS0000314.1	CSS0000314	14.44	15.09	13.48	13.45	14.115	9.79	11.34	11.75	11.04	10.98	11.06	9.64	9.87	10.85	10.355	9.37	12.64	10.18	12.35	11.135	19.43	15.02	13.55	14.21	15.5525
CSS0000315.1	CSS0000315	0	0	0	0	0	0	0	0	0	0	0	0	0	0	0	0	0	0	0	0	0	0	2.12	0	0.53
CSS0000316.1	CSS0000316	0.07	0	0.13	0.13	0.0825	0.12	0	0	0.23	0.0875	0.06	0.19	0.06	0.14	0.1125	0.13	0.13	0	0.07	0.0825	0.13	0.13	0.07	0.06	0.0975
CSS0000317.1	CSS0000317	16.65	13.82	10.57	18.32	14.84	79.64	46.39	41.19	81.44	62.165	21.71	35.74	45.78	19.58	30.7025	119.45	78.57	71.26	17.21	71.6225	11.64	16.65	8.79	10.82	11.975
CSS0000318.1	CSS0000318	2.55	3.11	3.28	2.68	2.905	1.46	3.04	3.09	1.6	2.2975	2.35	1.83	1.89	2.75	2.205	1.63	2.49	2.65	4.28	2.7625	3.38	3.31	3.41	3.8	3.475
CSS0000319.1	CSS0000319	0	0	0	0	0	0	0	0	0	0	0	0	0	0	0	0	0	0	0	0	0	0	0	0	0
CSS0000320.1	CSS0000320	0	0	0	0	0	0	0	0	0	0	0	0	0	0	0	0	0	0	0	0	0	0	0	0	0
CSS0000321.1	CSS0000321	0.82	0	0	0	0.205	0	0	0	0	0	0	0	0	0	0	0	0	0	0	0	0	0	0	0	0
CSS0000322.1	CSS0000322	0.3	0.31	0.4	0.9	0.4775	0	0.64	0	0.14	0.195	0.36	0.26	0.15	0.39	0.29	0.21	0.05	0.11	0	0.0925	0.65	0.16	0.45	0.34	0.4
CSS0000323.1	CSS0000323	113.32	106.65	108.14	116.94	111.263	92.15	96.28	97.41	77.34	90.795	121.41	103.95	93.1	88.69	101.788	79.33	90.92	85.26	82.91	84.605	111.79	127.48	94.5	112.9	111.667
CSS0000324.1	CSS0000324	0	0	0	0	0	0	0	0	0	0	0	0	0	0	0	0	0.31	0	0	0.0775	0	0.16	0	0	0.04
CSS0000325.1	CSS0000325	0	0	0	0	0	0.13	0	0.24	0	0.0925	0.26	0.52	0.39	0	0.2925	0	0	0	0	0	0	0.14	0	0	0.035
CSS0000326.1	CSS0000326	0.2	0.27	0.62	0.89	0.495	0.15	0.73	0.8	0.96	0.66	0.32	0.42	0.24	0.36	0.335	0	0.05	0.36	0.35	0.19	0.14	0.3	0.23	0.59	0.315
CSS0000327.1	CSS0000327	20.22	20.98	21.99	18.94	20.5325	15.05	9.48	14.2	8	11.6825	12.51	10.95	10.62	10.48	11.14	18.05	16.11	14.44	20.63	17.3075	21.97	21.05	16.05	20.2	19.8175
CSS0000328.1	CSS0000328	0	0	0	0	0	0	0	0	0	0	0	0	0	0	0	0	0	0	0	0	0	0	0	0	0
CSS0000329.1	CSS0000329	0	0	0	0	0	0	0	0	0	0	0	0	0	0	0	0	0	0	0	0	0	0	0	0	0
CSS0000330.1	CSS0000330	4.7	4.82	6.73	5.97	5.555	7.38	8.2	6.22	5.69	6.8725	6.22	6.48	7.38	7.8	6.97	10.86	8.06	8.16	6.73	8.4525	7.68	3.73	9.13	5.96	6.625
CSS0000331.1	CSS0000331	1.58	0.55	0	2.07	1.05	0	0	0	0	0	0	0	0	0	0	0	1.55	0	0	0.3875	1.03	1.05	0	0.52	0.65
CSS0000332.1	CSS0000332	8.91	6.71	7.81	8.76	8.0475	6.5	7.82	5.44	7.66	6.855	7.78	6.48	10.67	8.06	8.2475	8.34	10.89	6.75	10.21	9.0475	6.02	5.41	6.56	7.15	6.285
CSS0000333.1	CSS0000333	20.47	26.73	16.53	18.58	20.5775	43.81	33.97	32.61	71.34	45.4325	13.86	14.71	18.06	8.43	13.765	62.38	34.09	49.88	17.43	40.945	11.99	15.14	11.81	7.7	11.66
CSS0000334.1	CSS0000334	0	0	0	0	0	0	0	0	0	0	0	0	0	0	0	0	0	0	0	0	0	0	0	0	0
CSS0000335.1	CSS0000335	13.77	3.73	5.03	3.19	6.43	7.59	5.77	9.74	26.73	12.4575	7.34	8.68	17.54	5.82	9.845	13.79	18.6	23.83	8.98	16.3	7.3	5.33	7.73	5.11	6.3675
CSS0000336.1	CSS0000336	21.66	24.82	24.75	29.51	25.185	25.63	15.11	26.96	17.96	21.415	22	20.2	16.29	12.21	17.675	19.42	21.46	18.72	16.92	19.13	11.1	16.06	11.79	16.14	13.7725
CSS0000337.1	CSS0000337	151.96	149.55	204.35	130.23	159.023	209.08	165.09	188.18	171.06	183.353	175.03	160.29	178.48	191.04	176.21	154.11	167.65	176.44	296.19	198.597	196.34	158.77	176.9	216.3	187.077
CSS0000338.1	CSS0000338	0	0	0	0	0	0	0	0	0	0	0	0	0	0	0	0	0	0	0	0	0	0	0	0	0
CSS0000339.1	CSS0000339	9.68	7.84	7.05	8.19	8.19	5.79	8.88	9.07	7.93	7.9175	9.55	8.09	6.33	7.25	7.805	9	8.55	5.97	8.55	8.0175	9.63	7.38	10.28	10.17	9.365
CSS0000340.1	CSS0000340	0.1	0.05	0.1	0.05	0.075	0.05	0	0.05	0.06	0.04	0	0	0.05	0.11	0.04	0	0	0	0	0	0.05	0.1	0.05	0.1	0.075
CSS0000341.1	CSS0000341	0.41	0.12	0.46	0.35	0.335	0.11	0.27	0.2	0.16	0.185	0.12	0.13	0	0.28	0.1325	0	0	0.14	0.13	0.0675	0.05	0.17	0.14	0.09	0.1125
CSS0000342.1	CSS0000342	6	3.61	3.43	4.14	4.295	2.75	2.43	3.03	1.88	2.5225	4.63	3.63	1.83	1.7	2.9475	3.07	2.9	2.46	2.27	2.675	3.95	4.25	3.29	3.73	3.805
CSS0000343.1	CSS0000343	8.9	9.99	10.12	8.77	9.445	9.35	8.64	9.31	9.48	9.195	9.77	10.34	9.46	12.06	10.4075	8.47	9.29	11.23	12.77	10.44	9.89	8.77	13.37	11.06	10.7725
CSS0000344.1	CSS0000344	92.36	95.98	90.2	91.43	92.4925	69.12	69.39	71.19	47.28	64.245	78.67	61.52	62.22	64.93	66.835	60.65	63.72	67.33	60.17	62.9675	76.57	89.69	85.47	82.49	83.555
CSS0000345.1	CSS0000345	1.93	1.26	1.21	1.35	1.4375	0.57	1.1	1.34	1.58	1.1475	1.83	1.39	1.34	1.22	1.445	1.52	1.17	1.05	1.44	1.295	1.69	1.29	1.95	1.17	1.525
CSS0000346.1	CSS0000346	19.22	14.46	14.21	16.27	16.04	9.14	6.59	7.01	3.63	6.5925	9.59	8.7	6.08	6.79	7.79	7.91	8.59	5.63	4.6	6.6825	9.11	12.17	9.52	11.17	10.4925
CSS0000347.1	CSS0000347	18.47	18.22	13.73	17.14	16.89	18.02	27.11	18.35	25.01	22.1225	22.53	22.76	20.66	18.38	21.0825	21.9	24.21	23.86	20.56	22.6325	22.36	25.3	21.39	18.74	21.9475
CSS0000348.1	CSS0000348	1.58	1.9	2.16	2.72	2.09	8.85	4.48	4.56	11.24	7.2825	3.45	6.65	3.22	0	3.33	8.8	6.48	5.05	0	5.0825	2.01	2.87	5.18	2.9	3.24
CSS0000349.1	CSS0000349	11.78	15.1	13.24	12.42	13.135	11.52	11.44	11.69	8.87	10.88	13.82	12.33	10.3	13.37	12.455	12.87	13.98	11.74	15.69	13.57	14.57	14.97	13.59	14.57	14.425
CSS0000350.1	CSS0000350	0.23	0.47	1	0.84	0.635	0.16	0.11	0.56	0.33	0.29	0.28	0.47	0.49	0.37	0.4025	0.28	0.45	0.29	0.47	0.3725	0.6	0.68	0.57	0.27	0.53
CSS0000351.1	CSS0000351	0	16.96	0	0	4.24	0	0	0	0	0	0	0	0	0	0	0	0	0	0	0	0	0	0	0	0
CSS0000352.1	CSS0000352	3.01	3.29	16.29	5.7	7.0725	5.35	5.3	0	2.96	3.4025	11.17	8.47	0	28.85	12.1225	5.69	8.69	13.72	6.75	8.7125	2.95	8.51	16.26	24.23	12.9875
CSS0000353.1	CSS0000353	18.21	19.28	18.28	19.49	18.815	13.8	19.68	13.29	16.33	15.775	11.08	16.15	17.67	12.58	14.37	11.88	19.51	16.63	14.01	15.5075	15.21	19.84	20.54	18.94	18.6325
CSS0000354.1	CSS0000354	0	0	0	0	0	0	0	0	0	0	0	0	0	0	0	0	0	0	0	0	0	0	0	0	0
CSS0000355.1	CSS0000355	11.83	8.99	9.46	10.73	10.2525	10.62	9.76	13.89	11.89	11.54	8.48	18.77	14.47	19.02	15.185	8.11	18.14	12.67	8.68	11.9	8.16	5.17	8.08	5.09	6.625
CSS0000356.1	CSS0000356	0	0.2	0	0.39	0.1475	0.25	0.47	0	0.82	0.385	0.51	0.22	0.04	0.23	0.25	0.06	0.36	0	0.13	0.1375	0.99	0.39	0.11	0.16	0.4125
CSS0000357.1	CSS0000357	1.31	1.68	0.79	1.45	1.3075	0.46	0.63	0.29	0.19	0.3925	0.31	0.31	1.09	1.43	0.785	0.33	0.96	0.33	0.51	0.5325	0.79	0.49	1.15	1.11	0.885
CSS0000358.1	CSS0000358	2.64	3.9	2.95	3.57	3.265	1.14	2.21	3.19	2.66	2.3	4.14	3.24	2.82	2.81	3.2525	2.67	1.03	1.65	1.76	1.7775	2.47	3.6	3.03	1.93	2.7575
CSS0000359.1	CSS0000359	1.44	1.57	1.37	1.65	1.5075	1.19	1.79	1.38	0.99	1.3375	1.51	1.72	1.21	1.53	1.4925	1.18	1.3	1.36	2.12	1.49	2.31	2.53	2.08	1.56	2.12
CSS0000360.1	CSS0000360	2.93	5.48	19.37	10.39	9.5425	12.79	5.3	4.1	3.05	6.31	23.22	2.42	5.57	7.21	9.605	4.91	3.9	10.75	0	4.89	11	9.61	5.89	10.69	9.2975
CSS0000361.1	CSS0000361	0	0	0	0	0	0	0	0	0	0	0	0	0	0	0	0	0	0	0	0	0	0	0	0	0
CSS0000362.1	CSS0000362	5.24	7.62	4.66	7.2	6.18	7.71	5.36	6.66	9.15	7.22	8.89	11.3	13.18	8.34	10.4275	10.29	8.29	11.12	4.38	8.52	5.57	4.41	4.89	5.09	4.99
CSS0000363.1	CSS0000363	2.22	1.8	0.64	0.47	1.2825	0.45	1.1	0.75	0.94	0.81	1.23	1	1.16	0.36	0.9375	0.32	2.04	1.58	1.35	1.3225	1.14	1.64	2.18	0.4	1.34
CSS0000364.1	CSS0000364	0.23	0.15	0.07	0.07	0.13	0	0	0	0	0	0	0	0.07	0	0.0175	0.15	0.15	0	0.16	0.115	0.15	0	0.15	0.15	0.1125
CSS0000365.1	CSS0000365	0	0	0	0	0	0	16.41	0	18.02	8.6075	34.96	0	0	0	8.74	0	0	0	0	0	0	0	0	0	0
CSS0000366.1	CSS0000366	0.18	0.31	0	0.49	0.245	0.41	0	0.07	0	0.12	0.14	0	0	0.97	0.2775	0.15	0	0.3	0.31	0.19	0.43	0.15	0.15	0	0.1825
CSS0000367.1	CSS0000367	0	0	0	0	0	5.35	0	0	0	1.3375	0	0	5.11	7.21	3.08	5.69	0	0	0	1.4225	11.78	0	0	0	2.945
CSS0000368.1	CSS0000368	406.71	405.44	389.03	409.23	402.602	353.73	390.97	327.79	285.08	339.392	406.59	358.79	344.12	391.14	375.16	302.23	330.86	308.98	351.75	323.455	358.69	382.17	414.2	357.89	378.237
CSS0000369.1	CSS0000369	12.27	20.17	13.52	15.74	15.425	9.97	7.19	10.99	7.87	9.005	9.46	9.46	13.09	8.97	10.245	10.73	13.89	14.42	9.53	12.1425	18.82	13.61	9.65	11.21	13.3225
CSS0000370.1	CSS0000370	0	0	0	0	0	0	0	0	0	0	0	0	0	0	0	0	0	0	0	0	0	0	0	0	0
CSS0000371.1	CSS0000371	0	0	0	0	0	0	0	0	0	0	0	0	0	0	0	0	0	0	0	0	0	0	0	0	0
CSS0000372.1	CSS0000372	0	0	0	0	0	0	0.86	0	0	0.215	0	0	0	0	0	0	0.9	0	0	0.225	0	0	3.84	0	0.96
CSS0000373.1	CSS0000373	45.69	41.63	58.12	37.35	45.6975	333.55	330.4	152.32	615.68	357.987	103.73	128.3	167.81	130.27	132.528	711.69	367.17	335.27	64.16	369.573	36.18	38.66	56.52	26.69	39.5125
CSS0000374.1	CSS0000374	2.28	1.63	1.55	1.72	1.795	1.29	1.37	1.09	1.25	1.25	1.24	0.8	1.03	1.03	1.025	2.22	1	0.87	1.02	1.2775	0.99	1.32	1.19	1.3	1.2
CSS0000375.1	CSS0000375	13.08	15.89	13.71	13.95	14.1575	9.38	10.01	9.75	8.16	9.325	14.24	13.08	11.38	12.69	12.8475	7.43	9.01	9.09	8.64	8.5425	13.35	9.23	17.5	14.36	13.61
CSS0000376.1	CSS0000376	5.3	4.23	4.84	4.27	4.66	5.69	8.4	6.63	11.68	8.1	5.41	5.62	5.9	5.84	5.6925	5.66	5.33	6.54	6.13	5.915	4.41	4.45	5.97	5.12	4.9875
CSS0000377.1	CSS0000377	0	0	0	0	0	0	0	0	0	0	0	0	0	0	0	0	0	0	0	0	0	0	0	0	0
CSS0000378.1	CSS0000378	1.43	1.5	2.06	1.9	1.7225	1.13	4.79	6.7	5.18	4.45	0.96	4.71	3.35	2.59	2.9025	1.04	2.46	1.83	4.34	2.4175	2	4.04	5.25	3.9	3.7975
CSS0000379.1	CSS0000379	0	0.37	0	0	0.0925	0	0	0	0	0	0	0	0.31	0.42	0.1825	0.31	0	0.43	0	0.185	0	0	0	0.44	0.11
CSS0000380.1	CSS0000380	22.11	21.38	20.04	20.96	21.1225	19.71	20.76	22.2	17.57	20.06	16.28	16.92	17.86	18.76	17.455	14.71	13.68	17.31	18.1	15.95	16.57	13.18	18.55	21.62	17.48
CSS0000381.1	CSS0000381	5.55	6.05	10.02	0	5.405	9.87	0	0	5.47	3.835	10.29	0	0	0	2.5725	0	0	0	0	0	0	0	0	5.58	1.395
CSS0000382.1	CSS0000382	10.42	8.4	10.29	13.74	10.7125	14.9	10.71	14.67	7.62	11.975	11.04	11.24	10.06	13.99	11.5825	13.11	11.28	11.1	12.21	11.925	11.92	8.38	14.51	16.9	12.9275
CSS0000383.1	CSS0000383	0	0	0	0	0	0	0	0	0	0	0	0	0	0	0	0	0	0	0	0	0	0	0	0	0
CSS0000384.1	CSS0000384	18.78	22.02	22.67	21.49	21.24	16.56	21.89	19.28	20.09	19.455	21.7	19.86	17.14	21.11	19.9525	17.4	19.4	18.49	21.13	19.105	18.33	18.85	20.34	21.12	19.66
CSS0000385.1	CSS0000385	3.2	4.49	5.1	2.48	3.8175	1.55	1.39	5.31	1.29	2.385	2.77	2.46	2.1	1.82	2.2875	1.9	3.36	2.67	6.23	3.54	4.18	3.58	2.59	5.36	3.9275
CSS0000386.1	CSS0000386	7.3	8.18	7.21	5.94	7.1575	4.58	9.03	7.17	7.8	7.145	8.29	6.83	4.34	7.29	6.6875	10.04	11.54	9.45	8.91	9.985	12.8	9.67	13.57	11.17	11.8025
CSS0000387.1	CSS0000387	6.79	7.89	6.97	7.4	7.2625	3.54	5.59	4.98	3.93	4.51	4.43	5.26	5.62	4.84	5.0375	4.98	8.18	4.82	5.93	5.9775	4.32	6.5	4.72	5.13	5.1675
CSS0000388.1	CSS0000388	63.29	59.78	52.63	61.92	59.405	66.78	66.21	64	73.7	67.6725	67.4	56.8	67.98	81.9	68.52	43.53	53.7	60.29	86.02	60.885	48.68	62.5	58.74	43.41	53.3325
CSS0000389.1	CSS0000389	55.92	119.39	75.75	105.03	89.0225	65.63	117.02	144.79	193.13	130.142	112.41	166.28	207.34	179.09	166.28	42.62	119.83	157.09	96.93	104.117	98.59	54.56	150.51	93.01	99.1675
CSS0000390.1	CSS0000390	74.64	88.97	77.49	60.9	75.5	179.96	166.94	175.61	286.26	202.192	146.15	194.73	191.61	189.39	180.47	209.96	179.14	217.57	66.08	168.188	90.9	85.18	98.4	58.57	83.2625
CSS0000391.1	CSS0000391	0	0	0	0	0	0	0	0	0	0	0	0	0	0	0	0	0	0	0	0	0	0	0	0	0
CSS0000392.1	CSS0000392	0	0.39	0	0	0.0975	0	0	0	0	0	0	0	0	0	0	0	0	0	0	0	0	0	0	0	0
CSS0000393.1	CSS0000393	0	0	0	0	0	0	0	0	0	0	0	0	1.41	0	0.3525	0	0	0	0	0	0	0	0	0	0
CSS0000394.1	CSS0000394	66.07	73.79	80.61	70.88	72.8375	81.19	82.27	82.78	93.23	84.8675	65.37	71.76	93.35	71.81	75.5725	79.72	77.52	78.32	80.85	79.1025	58.01	60.32	69.76	70.96	64.7625
CSS0000395.1	CSS0000395	0	0	0	0	0	0	0.45	0	0	0.1125	0	0	0	0	0	0.23	0	0	0	0.0575	0	0	0	0	0
CSS0000396.1	CSS0000396	8.93	3.55	5.31	6.3	6.0225	3.61	9.53	4.42	16.19	8.4375	10.36	9.69	19.89	8.58	12.13	4.11	4.73	19.06	10.79	9.6725	8.21	9.43	9.02	4.93	7.8975
CSS0000397.1	CSS0000397	27.92	30.19	31.01	31.71	30.2075	31.76	37.06	29.81	34.81	33.36	29.15	29.75	29.84	31.62	30.09	39.99	36.3	38.94	26.39	35.405	28.69	30.51	32.29	32.77	31.065
CSS0000398.1	CSS0000398	7.19	6.41	6.06	6.78	6.61	4.8	6.68	5.68	4.19	5.3375	6.57	5.39	4.7	7.75	6.1025	4.19	3.66	4.1	7.71	4.915	5.04	5.8	7.85	6	6.1725
CSS0000399.1	CSS0000399	0	0	0	0	0	0	0	0	0	0	0	0	0	0	0	0	0	0	0	0	0	0	0	0	0
CSS0000400.1	CSS0000400	9.49	9.74	8.59	8.04	8.965	9.3	9.12	6.48	6.95	7.9625	8.82	7.54	6.82	8.85	8.0075	4.92	5.48	5.84	11.86	7.025	7.94	10.37	7.69	10.33	9.0825
CSS0000401.1	CSS0000401	0	0	0	0	0	0	0	0	0	0	0	0.03	0.03	0	0.015	0	0	0	0	0	0	0	0	0.13	0.0325
CSS0000402.1	CSS0000402	0	0	0	0	0	0	0.29	0	0	0.0725	0	0	0	0	0	0	0	0	0	0	0	0	0.3	0	0.075
CSS0000403.1	CSS0000403	0	0	0.53	0	0.1325	0	0	0	0.21	0.0525	0	0	0	0	0	0	0	0	0	0	0	0	0.19	0	0.0475
CSS0000404.1	CSS0000404	26.13	29.63	23.84	25.49	26.2725	27.12	30.49	28.73	31.37	29.4275	25.97	25.35	27.87	30.08	27.3175	29.96	31.56	32.31	24.64	29.6175	27.26	28.96	28.98	26.03	27.8075
CSS0000405.1	CSS0000405	1.46	1.21	2.27	1.45	1.5975	0.68	2.64	0.65	0.84	1.2025	1.13	0.71	0.14	0.8	0.695	1.46	0.87	0.89	1.46	1.17	1.42	1.18	1.45	0.73	1.195
CSS0000406.1	CSS0000406	45.73	43.12	43.56	42.6	43.7525	32.21	33.21	39.13	29.41	33.49	40.21	41.05	38.35	31.55	37.79	30.39	37.85	36.39	38.51	35.785	47.95	48.82	46.55	51.39	48.6775
CSS0000407.1	CSS0000407	10.31	6.25	4.43	0	5.2475	4.27	3.72	2.75	9.29	5.0075	2.19	2.23	4.37	0	2.1975	4.59	1.53	3.06	6.86	4.01	2.94	0.77	5.64	5.46	3.7025
CSS0000408.1	CSS0000408	1.54	2.24	3.27	1.21	2.065	1.14	2.38	1.62	0.35	1.3725	0.3	2.07	2.03	1.71	1.5275	2.77	0.91	0.31	0	0.9975	0.6	1.86	0.31	0.3	0.7675
CSS0000409.1	CSS0000409	31.78	32.99	29.93	26.26	30.24	23.15	20.52	24.1	17.88	21.4125	32.72	27.82	22.3	31.58	28.605	27.57	24.7	23.83	27.35	25.8625	35.25	38.36	29.04	25.35	32
CSS0000410.1	CSS0000410	0.89	1.28	1.2	1.22	1.1475	0.49	1.2	0.47	0.81	0.7425	0.34	1.36	1.34	1.55	1.1475	0.76	0.87	0.36	0.75	0.685	0.17	0	0.37	0.52	0.265
CSS0000411.1	CSS0000411	0.43	0.55	0.62	0.63	0.5575	0.1	0.52	0.38	0.25	0.3125	0	0.41	0.61	0.47	0.3725	0.32	0.53	0.22	0.11	0.295	0.72	1.18	0.21	0.31	0.605
CSS0000412.1	CSS0000412	0	0	0	0.5	0.125	0	0	0.22	0	0.055	0	0	0.24	0	0.06	0	0	0	0	0	0	0	0	0	0
CSS0000413.1	CSS0000413	0	0.39	0.26	0	0.1625	0	0	0.16	0	0.04	0	0	0	0.41	0.1025	0	0.18	0.19	0.03	0.1	0.17	0.19	0.19	0.18	0.1825
CSS0000414.1	CSS0000414	43.31	49.51	42.5	38.78	43.525	42.93	54.64	49.61	51.58	49.69	46.04	46.01	49.13	37.58	44.69	41.89	43.78	50.99	51.76	47.105	42.52	34.77	50.89	42.07	42.5625
CSS0000415.1	CSS0000415	2.28	2.91	2.47	2.61	2.5675	1.73	1.87	2.2	1.86	1.915	2.69	2.39	1.95	2.69	2.43	2.35	2.31	2.07	2.94	2.4175	2.09	3.12	1.79	2.39	2.3475
CSS0000416.1	CSS0000416	2.11	2.26	2.28	2.58	2.3075	0.95	2.31	1.73	0.69	1.42	2.29	1.23	1.46	1.75	1.6825	1.1	1.75	2.49	0.7	1.51	1.96	2.13	1.35	1.88	1.83
CSS0000417.1	CSS0000417	0	0	0	0	0	0	0	0	0	0	0	0	0	0	0	0	0	0	0	0	0	0	0	0	0
CSS0000418.1	CSS0000418	1.61	1.92	1.32	1.08	1.4825	1.03	0.99	0.75	1.67	1.11	0.82	0.66	1.54	1.3	1.08	2.04	1.75	1.38	1.32	1.6225	0.98	0.77	1.95	1.56	1.315
CSS0000419.1	CSS0000419	0	0	0	0	0	0	0	0	0	0	0	0	0	0	0	0	0	0	0	0	0	0	0	0	0
CSS0000420.1	CSS0000420	4.23	3.47	4.17	3.42	3.8225	2.96	3.01	2.59	1.21	2.4425	3.1	2.15	2.3	2.23	2.445	3.97	2.21	2.82	4.31	3.3275	3.82	4.04	4.31	4.35	4.13
CSS0000421.1	CSS0000421	0.56	1	1.35	0.55	0.865	0.52	1.09	0.99	2.25	1.2125	0.13	2.02	1.99	1.37	1.3775	0.42	2.06	0.56	1.3	1.085	1.08	0.85	1.12	1.35	1.1
CSS0000422.1	CSS0000422	0	0	0	0	0	0	0	0	0	0	0	0	0	0	0	0	0	0	0	0	0	0	0	0	0
CSS0000423.1	CSS0000423	0.63	0.33	0.15	0	0.2775	0	0.15	0.14	0.55	0.21	0.15	0	0	0.35	0.125	0	0.16	0.16	0.33	0.1625	0.15	0	0	0	0.0375
CSS0000424.1	CSS0000424	0.05	0	0	0	0.0125	0	0.1	0.04	0	0.035	0	0.05	0.05	0	0.025	0	0	0	0	0	0	0	0	0	0
CSS0000425.1	CSS0000425	76.11	71.24	107.22	87.03	85.4	74.66	81.33	107.9	63.1	81.7475	55.87	64.14	55.14	37.1	53.0625	64.21	104.91	88.25	99.99	89.34	75.44	73.93	76.08	96.61	80.515
CSS0000426.1	CSS0000426	0.31	0	0	0	0.0775	0	0	0	0	0	0	0	0	0	0	0	0	0	0	0	0	0	0	0	0
CSS0000427.1	CSS0000427	29.78	26.07	22.04	26.81	26.175	19.63	28.22	18.78	21.94	22.1425	22.28	23.3	28.94	25.78	25.075	19.12	26.12	23.63	22.8	22.9175	23.6	22.7	21.63	19.71	21.91
CSS0000428.1	CSS0000428	0	0	0	0	0	0	0	0	0	0	0	0	0	0	0	0	0	0	0	0	0	0.14	0	0	0.035
CSS0000429.1	CSS0000429	0	0	0	0	0	0	0	0	0	0	0	0	0	0	0	0	0	0	0	0	0	0	0	0	0
CSS0000430.1	CSS0000430	58.44	62.73	65.29	57.43	60.9725	40.66	27.94	28.39	29.31	31.575	43.76	48.2	25.94	32.26	37.54	40.84	64.22	44.23	35.12	46.1025	38.82	46.07	38.41	38.77	40.5175
CSS0000431.1	CSS0000431	16.71	19.81	17	17.72	17.81	12.76	17.72	14.91	14.42	14.9525	16.26	15.99	15.12	19.68	16.7625	19.37	20.25	20.04	18.36	19.505	20.69	21.5	20.12	18.24	20.1375
CSS0000432.1	CSS0000432	0	0	0	0	0	0.11	0.46	0.11	0.82	0.375	0	0	0	0	0	0	0.12	0.6	0.12	0.21	0	0	0.36	0	0.09
CSS0000433.1	CSS0000433	0	0	0	0	0	0	0	0	0	0	0	0	0	0	0	0	0	0	0	0	0	0	0	0	0
CSS0000434.1	CSS0000434	12.91	12.56	9.9	12.19	11.89	9.42	12.88	10.31	8.66	10.3175	8.98	9.59	8.5	9.2	9.0675	11.07	11.76	12.73	8.8	11.09	12.94	13.9	11.46	12.28	12.645
CSS0000435.1	CSS0000435	0	0	0	0	0	0	0	0	0	0	0	0	0	0	0	0	0	0	0	0	0	0	0	0	0
CSS0000436.1	CSS0000436	44.53	47.89	54.49	44.87	47.945	33.37	37.4	36.6	28.14	33.8775	43.82	35.68	34.01	42.7	39.0525	43.06	34.75	36.72	50.14	41.1675	48.63	52.32	47.41	51.28	49.91
CSS0000437.1	CSS0000437	0	0	0	0	0	0	0	0	0	0	0	0	0	0	0	0	0	0	0	0	0	0	0	0	0
CSS0000438.1	CSS0000438	0	0	0	0	0	0	0	0	0	0	0	0	0	0	0	0	0	0	0.16	0.04	0.15	0	0.16	0	0.0775
CSS0000439.1	CSS0000439	15.59	15.36	12.66	13.97	14.395	9.83	8.57	7.16	9.33	8.7225	9.49	8.13	5.73	8.26	7.9025	11.3	8.97	9.2	7.27	9.185	12.08	16.26	11.83	13.28	13.3625
CSS0000440.1	CSS0000440	27	20.72	18.18	20.17	21.5175	23.4	21.46	15.85	21.4	20.5275	31.2	24.73	20.93	30.72	26.895	21.72	19.55	20.23	17.83	19.8325	18.62	17.83	15.87	12.83	16.2875
CSS0000441.1	CSS0000441	1.52	4.39	0	3.71	2.405	2.77	0.71	3.22	2.48	2.295	0	3.6	0	0	0.9	2.98	1.49	0	1.71	1.545	0	0	0	0.76	0.19
CSS0000442.1	CSS0000442	7.07	2.71	3.71	4.76	4.5625	18.93	20.16	22.57	45.26	26.73	6.81	12.44	17.39	13.99	12.6575	23.58	21.86	23.34	9.92	19.675	4.89	6.49	9.16	8.87	7.3525
CSS0000443.1	CSS0000443	28	30.28	24.34	31.27	28.4725	17.86	15.55	20.31	14.03	16.9375	30.28	21.34	20.94	28.38	25.235	18.35	20.27	18.39	29.88	21.7225	31.02	31.46	27.99	33.49	30.99
CSS0000444.1	CSS0000444	22.8	19.9	18.62	17.65	19.7425	26.8	19.41	22.62	18.37	21.8	19.33	22.55	18.48	23.63	20.9975	21.98	20.55	20.58	33.68	24.1975	19.12	20.5	19.94	22.86	20.605
CSS0000445.1	CSS0000445	2.43	2.19	1.87	2.18	2.1675	0.65	0.61	0.56	0.64	0.615	0.25	0.53	0.21	0.6	0.3975	0.81	1.42	0.41	0.34	0.745	0.64	0.93	0.66	0.89	0.78
CSS0000446.1	CSS0000446	2.24	2.55	3.19	3.5	2.87	3.22	2.88	1.96	3.14	2.8	2.27	2.54	2.51	4.69	3.0025	3.67	1.83	2.24	2.88	2.655	3.77	3.69	3.33	3.04	3.4575
CSS0000447.1	CSS0000447	0	0	0	0	0	0	0	0	0	0	0	0	0	0	0	0	3.04	0	0	0.76	0	0	0	0	0
CSS0000448.1	CSS0000448	0	0	0	0	0	0	0	0	0	0	0	0	0	0	0	0	0	0	0	0	0	0	0	0	0
CSS0000449.1	CSS0000449	0	0	0.04	0.04	0.02	0.03	0.11	0.03	0.13	0.075	0.04	0	0	0.2	0.06	0.04	0	0.23	0	0.0675	0	0.04	0	0	0.01
CSS0000450.1	CSS0000450	0	0	0	0	0	0	0	0	0	0	0	0	0	0	0	0	0	0	0	0	0	0	0	0	0
CSS0000451.1	CSS0000451	0	0	0	0	0	0	0	0	0	0	0	0	0	0	0	0	0	0	0	0	0	0	0	0	0
CSS0000452.1	CSS0000452	0	0.41	0	0.13	0.135	0.12	0.13	0	0.15	0.1	0	0.13	0	0	0.0325	0	0	0	0	0	0	0.13	0	0	0.0325
CSS0000453.1	CSS0000453	8.54	5.32	5.87	4.2	5.9825	5.79	6.92	5.02	5.51	5.81	7.21	8.58	7.43	9.38	8.15	7.29	6.13	6.27	7.62	6.8275	3.45	5.19	4.48	6.42	4.885
CSS0000454.1	CSS0000454	0	0	0	0	0	0	0	0	0.37	0.0925	0.32	0	0.62	0	0.235	0	0	0	0	0	0	0.33	0	0.32	0.1625
CSS0000455.1	CSS0000455	0.8	0.83	1.15	0	0.695	1.1	1.15	3.47	1.34	1.765	0.77	0.38	0	0.45	0.4	1.98	0.79	1.57	0.85	1.2975	0	0.8	0.82	1.18	0.7
CSS0000456.1	CSS0000456	0	0	0	0	0	0	0	0	0	0	0	0	0	0	0	0	0	0	0	0	0	0	0	0	0
CSS0000457.1	CSS0000457	0	0	0	0	0	0	0	0	0	0	0	0	0	0	0	0.88	0	0	0	0.22	0	0	1.86	0	0.465
CSS0000458.1	CSS0000458	4.81	5.51	3.62	4.41	4.5875	1.09	3.01	2.59	1.34	2.0075	5.56	5.23	4.4	5.21	5.1	2.09	3.2	2.15	2.77	2.5525	5.41	4.23	5.83	5.43	5.225
CSS0000459.1	CSS0000459	116.85	111.54	106.31	116.82	112.88	92.19	86.51	98.04	71.57	87.0775	114.09	98.89	88.11	70.32	92.8525	77.57	70.42	80.48	92.56	80.2575	113.03	94.87	100.49	131.87	110.065
CSS0000460.1	CSS0000460	5.31	3.11	3.19	4.66	4.0675	2.71	1.98	3.6	1.71	2.5	4.79	4.82	2.53	2.23	3.5925	2.43	2.35	3.06	5.53	3.3425	3.81	4.21	4.12	5.37	4.3775
CSS0000461.1	CSS0000461	2.84	2.11	1.56	3.59	2.525	1.87	0.78	0.7	0.45	0.95	2.72	1.55	4.15	3.62	3.01	0	1.2	1.21	2.15	1.14	3.95	8.91	4.97	2.41	5.06
CSS0000462.1	CSS0000462	24.08	24.42	22.88	22.69	23.5175	15.96	19.4	15.83	15.68	16.7175	21.56	19.69	18.3	24.17	20.93	15.43	16.99	17.39	20.78	17.6475	21.79	21.9	21.03	21.06	21.445
CSS0000463.1	CSS0000463	5.68	4.44	1.57	1.11	3.2	2.86	1.42	2.5	3.89	2.6675	3.45	2.41	2.13	2.63	2.655	2.52	2.05	3.04	3.88	2.8725	0.91	0	2.36	1.54	1.2025
CSS0000464.1	CSS0000464	0.22	0.07	0.35	0.07	0.1775	0.07	0	0	0.08	0.0375	0.07	0.07	0	0	0.035	0.22	0.14	0.15	0.07	0.145	0.42	0.07	0.36	0.28	0.2825
CSS0000465.1	CSS0000465	40.61	43.22	37.76	40.28	40.4675	31.31	46.25	38.25	36.9	38.1775	43.66	41.47	37.47	43.82	41.605	38.9	42.13	43	45.19	42.305	56.16	51.5	54.17	50.54	53.0925
CSS0000466.1	CSS0000466	1.44	0	0	0.57	0.5025	0.27	0.28	0.5	0	0.2625	0.28	0.28	1.08	0.32	0.49	0.29	0.85	0.58	0.61	0.5825	0.28	0.58	0	1.41	0.5675
CSS0000467.1	CSS0000467	12.48	9.48	10.7	10.62	10.82	25.48	13.13	19.55	37.97	24.0325	19.13	10.28	9.15	8.24	11.7	28.23	24.06	35.15	11.28	24.68	7.81	10.12	5.31	9.6	8.21
CSS0000468.1	CSS0000468	0	0	0	0	0	0	0	0	0	0	0	0	0	0	0	0	0	0	0	0	0	0	0	0	0
CSS0000469.1	CSS0000469	9	8.74	7.46	7.5	8.175	6.33	7.97	5.9	5.63	6.4575	7.85	7.4	6.62	8.95	7.705	6.13	6.8	6.87	8.99	7.1975	9.71	7.95	8.13	10.04	8.9575
CSS0000470.1	CSS0000470	0	0	0	0	0	0	0	0	0	0	0	0	0	0	0	0	0	0	0	0	0	0	0	0	0
CSS0000471.1	CSS0000471	45.36	54.42	54.72	37.71	48.0525	31.47	18.01	38.69	12.17	25.085	26.06	21.83	18.58	20.38	21.7125	25.26	29.84	27.51	53.2	33.9525	54.09	55.63	45.33	60.85	53.975
CSS0000472.1	CSS0000472	1179.33	1214.7	1443.77	1066.91	1226.18	1444.89	1331.35	1656.39	1307.45	1435.02	1550.18	1481.61	1638.55	1484.38	1538.68	1381.98	1533.92	1518.72	1920.66	1588.82	1918.99	1634.77	1348.7	1534.49	1609.24
CSS0000473.1	CSS0000473	0.32	0.16	0.36	0.36	0.3	0.15	0.36	0.33	0.43	0.3175	0.25	0.05	0.25	0.35	0.225	0.42	0.42	0.11	0.22	0.2925	0.2	0.32	0.53	0.82	0.4675
CSS0000474.1	CSS0000474	8.54	8.36	5.53	7.56	7.4975	10.2	12.2	6.3	12.79	10.3725	8.52	8.24	8.67	11.07	9.125	12.67	9.25	7.91	3.11	8.235	6.34	7.46	6.44	6.37	6.6525
CSS0000475.2	CSS0000475	23.35	23.35	16.73	23.53	21.74	5.84	16.92	7.03	7.33	9.28	5.73	10.5	7.16	16.9	10.0725	4.73	13.99	7.14	7.49	8.3375	12.92	15.57	17.7	12.4	14.6475
CSS0000476.1	CSS0000476	0	0	0	0	0	0	0	0	0	0	0	0	0	0	0	0	0	0	0	0	0	0	0	0	0
CSS0000477.1	CSS0000477	0.47	0	0.45	0	0.23	0	0	0	0	0	0	0	0	0	0	0	0	0	0.5	0.125	0	0	0	0	0
CSS0000478.1	CSS0000478	8.8	15.27	19.67	12.34	14.02	6.56	10.41	6.53	7.49	7.7475	10.42	12.02	6.62	11.22	10.07	6.64	7.82	7.47	5.78	6.9275	13.86	7.1	11.54	11.6	11.025
CSS0000479.1	CSS0000479	18.27	17.38	13.83	16.17	16.4125	9.01	9.83	10.92	7.13	9.2225	10.19	10.03	12.61	11.66	11.1225	9.28	8.65	12.39	11.41	10.4325	14.88	14.99	16.77	18.23	16.2175
CSS0000480.1	CSS0000480	2.29	2.64	0.92	2.52	2.0925	1.38	1.41	1.43	2.02	1.56	2.08	0.65	1.28	2.81	1.705	1.39	1.86	2.73	0.84	1.705	2.09	1.77	2.38	1.97	2.0525
CSS0000481.1	CSS0000481	0	0	0	0	0	0	0	0	0	0	0	0	0	0	0	0	0	0	0	0	0	0	0	0	0
CSS0000482.1	CSS0000482	11.46	9.22	9.99	10.88	10.3875	2.88	1.9	4.95	1.17	2.725	6.62	4.15	4.89	4.09	4.9375	2.22	5.42	2.11	6.04	3.9475	8.42	9.21	8.18	11.41	9.305
CSS0000483.1	CSS0000483	0	0	0	0	0	0	0	0	0	0	0	0	0	0	0	0	0	0	0	0	0	0	0	0	0
CSS0000484.1	CSS0000484	1.38	2.64	2.54	2.92	2.37	1.29	2.7	2.47	2.34	2.2	2.19	2.96	1.82	2.27	2.31	1.19	1.07	2.2	1.23	1.4225	0.67	1.2	1.44	1.82	1.2825
CSS0000485.1	CSS0000485	0	0	0	0	0	0	0	0	0	0	0	0	0	0	0	0	0	0	0	0	0	0	0	0	0
CSS0000486.1	CSS0000486	23.2	23.04	18.14	22.91	21.8225	18.7	21.54	17.57	20.07	19.47	20.89	22.85	20.69	22.23	21.665	19.67	20.64	20.13	19.88	20.08	20.78	26.51	17.71	20.2	21.3
CSS0000487.1	CSS0000487	0.8	0	0	0.39	0.2975	4.42	2.68	2.77	6.27	4.035	2.68	1.53	2.98	0.89	2.02	4.76	5.89	5.94	1.16	4.4375	1.56	1.2	4.08	1.18	2.005
CSS0000488.1	CSS0000488	0	0	0	0	0	0	0	0	0	0	0	0	0	0	0	0	0	0	0	0	0	0	0	0	0
CSS0000489.1	CSS0000489	5.98	8.49	8.66	5.16	7.0725	8.03	9.6	10.77	5.37	8.4425	6.34	8.02	7.7	10.73	8.1975	8.64	12.39	10.28	9.05	10.09	6.17	4.86	7.25	9.45	6.9325
CSS0000490.1	CSS0000490	0	0	0	0	0	0	0	0	0	0	0	0	0	0	0	0	0	0	0	0	0	0	0	0	0
CSS0000491.1	CSS0000491	43.86	36.75	34.72	35.7	37.7575	33.97	35.9	25.62	25.85	30.335	37.44	32.33	29.31	38.86	34.485	37.77	33.09	29.51	30.37	32.685	40.06	44.71	44.67	38.03	41.8675
CSS0000492.1	CSS0000492	9.9	12.32	11.92	10.43	11.1425	7.04	8.71	10.07	8.97	8.6975	12.24	9.26	9.64	11.14	10.57	9.68	10.88	10.9	16.09	11.8875	19.19	17.48	14.34	13.63	16.16
CSS0000493.1	CSS0000493	0	0	0	4.78	1.195	0	0	0	0	0	0	0	0	0	0	0	0	0	0	0	0	0	0	0	0
CSS0000494.1	CSS0000494	9.28	9.09	10.86	11.68	10.2275	8.46	11.06	11.41	10.77	10.425	11.38	10.44	10.21	12.62	11.1625	10.82	10.4	11.23	14.75	11.8	14.08	12.83	12.77	13.21	13.2225
CSS0000495.1	CSS0000495	0.22	0.54	0.6	0.31	0.4175	0.43	0.32	0.33	0.35	0.3575	0.73	0.41	0.32	0.28	0.435	0.38	0.25	0.33	0.26	0.305	0.62	0.34	0.88	0.52	0.59
CSS0000496.1	CSS0000496	0.1	0	0	0.25	0.0875	0	0	0.13	0	0.0325	0.26	0	0.24	0	0.125	0.04	0	0.48	0.15	0.1675	0	0	0	0.08	0.02
CSS0000497.1	CSS0000497	0	0	0	0.99	0.2475	0	0	0	0	0	0	0	0	0	0	0	0	0	0	0	0	0	0	0	0
CSS0000498.1	CSS0000498	1.96	1.53	1.41	1.2	1.525	1.01	2.37	1.01	2.68	1.7675	0.72	1.54	1	2.09	1.3375	1.44	1.03	0.95	0.87	1.0725	1.5	1.16	1.86	1.77	1.5725
CSS0000499.1	CSS0000499	0.34	2.1	1.62	0.66	1.18	3.03	1.94	1.18	2.28	2.1075	1.29	1.62	0.32	2.62	1.4625	2.35	0.99	0	1.42	1.19	2.29	0.67	0.34	0.33	0.9075
CSS0000500.1	CSS0000500	1.97	1.98	1.97	1.94	1.965	1.62	1.89	1.63	1.18	1.58	2.66	2.1	1.9	1.83	2.1225	1.69	1.23	1.13	3.33	1.845	1.49	1.75	1.68	2.37	1.8225
CSS0000501.1	CSS0000501	3.91	3.59	3.44	4.48	3.855	1.64	3.79	2.31	2.01	2.4375	2.28	2.25	1.99	3.93	2.6125	2.86	2.7	2.21	3	2.6925	2.86	4.09	3.36	2.75	3.265
CSS0000502.1	CSS0000502	0.34	0.12	0.22	1.23	0.4775	0.11	0.77	0.4	0.66	0.485	0.66	0.11	0.11	1.12	0.5	0.45	1.12	0.8	0.35	0.68	0.66	0.8	0.45	0.66	0.6425
CSS0000503.1	CSS0000503	0	0	0	1.58	0.395	0	0	0	0	0	0	0	0	0	0	0	0	0	0	0	0	0	0	0	0
CSS0000504.1	CSS0000504	0.89	0.98	0.54	0.96	0.8425	0.55	0.38	0.92	0.53	0.595	0.59	0.12	0.61	0	0.33	0.67	0.85	0.29	1.84	0.9125	0.92	1.02	0.63	0.59	0.79
CSS0000505.1	CSS0000505	0	0	0	0	0	0	0	0	0	0	0	0	0	0	0	0	0	0	0	0	0	0	0	0	0
CSS0000506.1	CSS0000506	13.27	17.33	11.09	13.32	13.7525	16.35	11.2	4.56	8.38	10.1225	11.2	9.17	6.13	13.78	10.07	14.71	6.91	7.26	9.23	9.5275	8.55	9.39	8.22	4.77	7.7325
CSS0000507.1	CSS0000507	21.7	27.8	27.63	28.61	26.435	26.97	29.32	26.39	28.06	27.685	23.96	22.52	26.74	20.41	23.4075	19.17	15.29	22.97	24.83	20.565	23.91	24.5	27.67	28.49	26.1425
CSS0000508.1	CSS0000508	68.05	71.48	70.7	91.15	75.345	54.66	77.88	52.12	42.7	56.84	46.29	62.53	59.93	82.93	62.92	44.3	39.09	52.52	58.01	48.48	58.44	50.35	67.21	68.54	61.135
CSS0000509.1	CSS0000509	280.37	289.92	255.83	223.08	262.3	342.09	315.68	369.88	382.16	352.453	307.57	357.04	365.29	339.1	342.25	409.9	431.59	441.39	235.87	379.688	307.06	330.32	288.02	293.77	304.793
CSS0000510.1	CSS0000510	0	0	0	0	0	0	0	0	0	0	0	0	0	0	0	0	0	0	0	0	0	0	0	0	0
CSS0000511.1	CSS0000511	0	0	0	0	0	0	0	0	0	0	0	0	0	0	0	0	0	0	0	0	0	0	0	0	0
CSS0000512.1	CSS0000512	0	0	0	0	0	0	0	0	0	0	0	0	0	0	0	0	0	0	0	0	0	0	0	0	0
CSS0000513.1	CSS0000513	5.92	9.97	10.45	5.36	7.925	4.61	9.12	7.87	5.58	6.795	6.09	12.18	10.55	9.16	9.495	8.11	9.84	12.14	11.13	10.305	9.75	6.8	10.7	21.64	12.2225
CSS0000514.1	CSS0000514	0	0	0	0	0	0	0	0	0	0	0	0	0	0	0	0	0	0	0	0	0	0	0	0	0
CSS0000515.1	CSS0000515	0.88	1.41	1	1.51	1.2	2.11	1.05	1.95	1.44	1.6375	1.59	2.19	1.54	3.47	2.1975	2.05	1.37	3.03	2.04	2.1225	2.01	0.66	1.24	1.52	1.3575
CSS0000516.1	CSS0000516	0	0.16	0.22	0	0.095	0	0.52	0	0.09	0.1525	0	0.15	0	0.08	0.0575	0	0.07	0	0	0.0175	0.07	0	0	0.07	0.035
CSS0000517.1	CSS0000517	94.53	86.34	96.75	99.31	94.2325	596.26	570.75	387.45	584.87	534.832	327.28	298.09	296.95	243.41	291.433	688.01	466.96	471.89	171.54	449.6	83.81	144.57	128.42	120.42	119.305
CSS0000518.1	CSS0000518	0	0	0	0	0	0	0	0	0	0	0	0	0.08	0	0.02	0	0	0	0.09	0.0225	0	0	0	0	0
CSS0000519.1	CSS0000519	0.46	0.87	0.52	0.42	0.5675	0.36	0.31	0.12	0.21	0.25	0.29	0.28	0.14	0.95	0.415	0.44	0.23	0.34	0.16	0.2925	0.46	0.39	0.66	0.33	0.46
CSS0000520.1	CSS0000520	0	0	0.18	0.06	0.06	0.06	0	0	0	0.015	0.06	0	0	0	0.015	0	0	0	0.06	0.015	0	0.12	0.06	0	0.045
CSS0000521.1	CSS0000521	4.77	5.04	4.49	7.45	5.4375	8.24	3.11	9.63	5.65	6.6575	5.41	6.33	9.03	4.9	6.4175	3.73	9.32	11.96	6.19	7.8	0.47	0.47	0.5	1.91	0.8375
CSS0000522.1	CSS0000522	0.74	0.94	1.55	0.6	0.9575	1.29	0.74	0.24	0.56	0.7075	1.81	0.42	1.05	0.29	0.8925	1.01	0.11	1.04	1.15	0.8275	2.18	0.53	1.15	1.67	1.3825
CSS0000523.1	CSS0000523	0.7	0	0.66	0	0.34	0	0	0	0	0	0.66	0	0	0	0.165	0	0	0	0	0	0	0	0.74	0.71	0.3625
CSS0000524.1	CSS0000524	19.29	31.86	28.83	28.44	27.105	19.9	15.72	22.23	16.21	18.515	24.11	21.61	20.58	22.15	22.1125	22.85	23.07	18.46	29.86	23.56	31.11	22.16	22.28	26.27	25.455
CSS0000525.1	CSS0000525	38.12	32.24	24.12	35.21	32.4225	33.85	42.25	25.97	39.51	35.395	35.35	31.55	30.1	25.46	30.615	31.57	34.78	28.04	23.72	29.5275	23.74	24.36	29.86	21.92	24.97
CSS0000526.1	CSS0000526	0	0	0	0	0	0	0	0	0	0	0	0	0	0	0	0	0	0	0	0	0	0	0	0	0
CSS0000527.1	CSS0000527	65.47	68.66	68.19	67.28	67.4	58.02	66.82	44.06	42.34	52.81	67.87	60.61	54.44	65.07	61.9975	60.7	53.9	50.39	44.96	52.4875	63.08	85.56	70.26	68.55	71.8625
CSS0000528.3	CSS0000528	9.15	9.33	9.34	9.79	9.4025	8.31	7.94	6.67	5.35	7.0675	9.33	6.95	7.01	7.9	7.7975	8.81	7.99	8.42	9.09	8.5775	8.36	9.37	9.27	10.75	9.4375
CSS0000529.1	CSS0000529	0	0	0	0	0	0	0	0	0	0	0	0	0	0	0	0	0	0	0	0	0	0	0	0	0
CSS0000530.1	CSS0000530	0.83	0.32	0.4	0.23	0.445	0.17	0.1	0.27	0.31	0.2125	0.42	0.19	0.22	0.17	0.25	0.1	0.15	0.06	0.37	0.17	0.38	0.26	0.05	0.25	0.235
CSS0000531.1	CSS0000531	15.78	15.1	13.75	13.62	14.5625	36.75	12.15	11.09	13.63	18.405	20.2	19.49	15.16	25.02	19.9675	43.59	17.81	22.38	10.55	23.5825	14	12.37	15.94	9.22	12.8825
CSS0000532.1	CSS0000532	68.01	61.19	68.22	70.51	66.9825	55.59	59.44	68.74	67.05	62.705	67.46	64.52	71.53	64.22	66.9325	63.39	61.1	62.84	80.91	67.06	73.09	60.04	64.89	80.99	69.7525
CSS0000533.1	CSS0000533	9.72	8.65	9.72	11.16	9.8125	9.32	10.61	10.03	8.31	9.5675	8.81	11.65	14.02	9.2	10.92	9.13	7.4	9.81	8.44	8.695	4.99	5.34	9.47	6.16	6.49
CSS0000534.1	CSS0000534	4.83	3.36	4.78	5.06	4.5075	4	3.06	5.36	5.88	4.575	5.06	2.43	4.87	3.47	3.9575	5.77	3	4.54	1.87	3.795	3.36	4.22	4.88	4.41	4.2175
CSS0000535.1	CSS0000535	1.38	1.19	1.58	1.14	1.3225	0.87	0.8	0.77	0.53	0.7425	1.16	0.79	0.9	1.07	0.98	0.37	1.16	0.82	0.66	0.7525	1.5	1.61	1.43	0.77	1.3275
CSS0000536.1	CSS0000536	9.34	7.74	7.19	9.93	8.55	6.61	5.23	4.75	4.55	5.285	5.76	5.53	7.22	5.01	5.88	6.04	4.38	4.82	5.39	5.1575	5.82	4.94	7.16	7.29	6.3025
CSS0000537.1	CSS0000537	3.37	3.07	2.96	2.9	3.075	2.74	2.27	2.06	2.21	2.32	2.19	2.3	2.11	2.86	2.365	3.37	2.12	3.21	2.76	2.865	3.95	3.94	2.44	2.93	3.315
CSS0000538.1	CSS0000538	1.17	2.69	0	1.56	1.355	1.73	0	1.17	0.95	0.9625	1.37	0	1.73	1.21	1.0775	1.31	1.61	1	0.94	1.215	0.52	0	1.01	0	0.3825
CSS0000539.1	CSS0000539	0	0	0	0	0	0	0.52	0	0	0.13	0	0	0	0	0	0	0	0	0	0	0.27	0	0	0	0.0675
CSS0000540.1	CSS0000540	73.3	81.22	71.99	78.38	76.2225	75.47	64.12	72.6	134.94	86.7825	49.38	53.49	90.72	50.22	60.9525	48.74	66.46	65.76	41.81	55.6925	22.03	39.32	57.78	35.22	38.5875
CSS0000541.1	CSS0000541	8.45	8.42	8.16	5.14	7.5425	5.26	7.14	4.8	5	5.55	6.39	5.49	3.45	4.91	5.06	2.75	6.27	5.83	5.51	5.09	7.02	7.17	5.38	6.04	6.4025
CSS0000542.1	CSS0000542	0.02	0.05	0	0.02	0.0225	0.14	0	0	0.03	0.0425	0	0.02	0	0.05	0.0175	0	0	0.07	0	0.0175	0.05	0	0	0.09	0.035
CSS0000543.2	CSS0000543	5.73	7.05	10.76	7.45	7.7475	3.47	8.01	7.22	9.24	6.985	2.7	12.66	6.02	3.27	6.1625	4.66	6.52	5.53	12.37	7.27	7.45	15.91	10.9	18.11	13.0925
CSS0000544.1	CSS0000544	0	0.17	0.05	0	0.055	0.05	0	0	0.06	0.0275	0	0	0	0	0	0	0	0	0	0	0	0.11	0.05	0	0.04
CSS0000545.1	CSS0000545	0	0	0	0	0	0	0	0	0	0	0	0	0	0	0	0	0	0	0	0	0	0	0	0	0
CSS0000546.1	CSS0000546	15.17	13.62	11.88	11.74	13.1025	14.78	11.1	13.43	16.85	14.04	17.98	14.34	14.48	17.12	15.98	19.88	16.23	14.77	13.63	16.1275	16.96	13.37	12.91	11.04	13.57
CSS0000547.1	CSS0000547	1.31	3.22	5.9	3.62	3.5125	5.85	3.07	3.88	3.44	4.06	3.95	3.76	2.23	5.25	3.7975	4.08	2.42	3.25	7.86	4.4025	3.45	3.48	4.12	2.08	3.2825
CSS0000548.1	CSS0000548	0	0	0	0	0	0	0	0	0	0	0	0	0	0	0	0	0	0	0	0	0	0	0	0	0
CSS0000549.1	CSS0000549	0	0.63	0	0	0.1575	0	0	0	0	0	0	0	0.55	0	0.1375	0	0	0	0	0	0.58	0	2.46	0	0.76
CSS0000550.1	CSS0000550	0	0	0	0	0	0	0	0	0	0	0	0	0	0	0	0	0	0	0	0	0	0	0	0	0
CSS0000551.1	CSS0000551	20.55	18.02	19.2	19.64	19.3525	15.83	18.56	17.73	13.4	16.38	17.72	17.16	16.7	18.03	17.4025	16.24	14.78	17.26	22.58	17.715	23	19.65	20.1	23.03	21.445
CSS0000552.1	CSS0000552	0	0	0	0	0	0	0	0	0	0	0	0	0	0	0	0	0	0	0	0	0	0	0	0.15	0.0375
CSS0000553.1	CSS0000553	0	0	0	0	0	0	0	0	0	0	0	0	0	0	0	0	0	0	0	0	0	0	0	0	0
CSS0000554.1	CSS0000554	2.46	3.97	2.54	3.32	3.0725	13.86	5.92	6.63	41.91	17.08	1.23	6.39	6.61	3.61	4.46	16.58	8.94	8.5	4.74	9.69	1.56	1.21	5.56	0.61	2.235
CSS0000555.1	CSS0000555	28.63	28.49	25.42	30.37	28.2275	18.81	20.62	16.17	18.32	18.48	22.53	19.82	18.1	23.78	21.0575	19.89	22.03	21.31	18.53	20.44	29.1	36.36	27.94	26.63	30.0075
CSS0000556.1	CSS0000556	1.84	1.38	1.3	3.3	1.955	1.4	0.98	1.77	1.35	1.375	1.29	0.81	1.11	0.37	0.895	0.5	0.16	1.01	0.7	0.5925	0.32	0.17	1.35	0.98	0.705
CSS0000557.1	CSS0000557	0	0	0.05	0.2	0.0625	0	0	0.05	0.22	0.0675	0.27	0	0	0	0.0675	0	0	0	0	0	0.07	0	0	0.26	0.0825
CSS0000558.1	CSS0000558	7.24	9.65	8.48	9.15	8.63	20.35	20.87	15.05	21.9	19.5425	16.08	14.78	17.75	21.06	17.4175	24.17	15.41	17.93	13.94	17.8625	11.31	12.15	14.66	10.74	12.215
CSS0000559.1	CSS0000559	0	0	0	0	0	0	0	0	0	0	0	0	0	0	0	0	0	0	0	0	0	0	0	0	0
CSS0000560.1	CSS0000560	105.66	81.31	131.88	247.4	141.562	271.73	156.36	246.07	356.12	257.57	224.49	128.68	257.43	254.69	216.322	148.68	263.05	267.45	346.49	256.418	185.76	138.33	126.54	159.23	152.465
CSS0000561.1	CSS0000561	18.3	18.14	20.41	13.98	17.7075	6.85	4.18	6.79	3.03	5.2125	6.77	5.68	6.01	5.18	5.91	6.29	9.79	6.88	9	7.99	19.33	18.36	14.53	15.77	16.9975
CSS0000562.1	CSS0000562	14.45	10.69	8.37	10.19	10.925	7.69	7.5	4.09	9.28	7.14	11.66	6.92	14.66	8.99	10.5575	9.99	6.35	10.43	7.21	8.495	9.51	10.97	7.78	5.23	8.3725
CSS0000563.1	CSS0000563	0	0	0	0	0	0	0	0	0.14	0.035	0.12	0	0	0	0.03	0	0.06	0	0	0.015	0	0	0.12	0	0.03
CSS0000564.1	CSS0000564	0	0	0	0	0	0	0	0	0	0	0	0	0	0	0	0	0	0	0	0	0	0	0	0	0
CSS0000565.1	CSS0000565	3.4	2.05	1.93	3.28	2.665	1.63	0.74	1.56	1.57	1.375	3.9	3.2	1.53	2.55	2.795	1.75	1.35	1.2	2.66	1.74	2.49	3.8	2.49	3.52	3.075
CSS0000566.1	CSS0000566	0	0	0.77	1.96	0.6825	0	0.38	0	0.45	0.2075	0.38	1.91	0	0.45	0.685	2.38	0.39	0.4	0.42	0.8975	0	0.4	0	0	0.1
CSS0000567.1	CSS0000567	0	0	0	0	0	0	0	0	0	0	0	0	0	0	0	0	0	0	0	0	0	0	0	0	0
CSS0000568.1	CSS0000568	11.87	13.09	18.4	19.58	15.735	14.29	7.67	13.34	6.17	10.3675	20.79	19.02	17.74	21.82	19.8425	11.69	14.08	12.22	14.71	13.175	14.61	21.64	14.78	16.77	16.95
CSS0000569.1	CSS0000569	0	0	0	0	0	0	0	0	0	0	0	0	0	0	0	0	0	0	0	0	0	0	0	0	0
CSS0000570.1	CSS0000570	63.36	66.64	58.81	60.72	62.3825	50.42	48.43	46.99	52.64	49.62	59.37	56.69	48.41	59.68	56.0375	51.03	55.92	50.65	74.84	58.11	69.77	66.78	58.95	55.05	62.6375
CSS0000571.1	CSS0000571	1	1.03	0.48	1.22	0.9325	0.23	0.96	1.09	0.57	0.7125	0.72	0.72	0.94	1.37	0.9375	0.74	0	0.25	1.04	0.5075	1.21	0.5	1.26	0.98	0.9875
CSS0000572.1	CSS0000572	0	0	0	0	0	0	0	0	0	0	0	0	0	0	0	1.25	0	0	0	0.3125	0	0	0	0	0
CSS0000573.1	CSS0000573	0.19	0.39	0.31	0.72	0.4025	0.47	0.5	0.08	0.68	0.4325	0.82	0.79	0.83	1.09	0.8825	0.11	0.33	0.37	0.76	0.3925	0.51	0.49	0.67	0.4	0.5175
CSS0000574.1	CSS0000574	5.01	5.25	5.75	4.93	5.235	4.92	4.5	4.6	4.33	4.5875	5.63	4.39	3.08	4.53	4.4075	5.32	5.89	5.48	4.68	5.3425	6.26	6.85	4.97	5.74	5.955
CSS0000575.1	CSS0000575	9.88	10.24	10.74	9.24	10.025	5.92	7.89	8.49	6.78	7.27	10.44	7	7.81	7.91	8.29	5.7	6.65	5.93	8.11	6.5975	9.15	8.56	6.84	12.44	9.2475
CSS0000576.1	CSS0000576	0	0	0	0	0	0	0	0	0	0	0	0	0	0	0	0	0	0	0	0	0	0	0	0	0
CSS0000577.1	CSS0000577	0	0	0	0	0	0	0.29	0	0	0.0725	0	0	0.18	0.52	0.175	0	0.27	0	0	0.0675	0.49	0	0	0	0.1225
CSS0000578.1	CSS0000578	1.84	3.04	2.84	3.8	2.88	1.51	1.18	3.28	1.65	1.905	1.24	2.43	2.64	5.12	2.8575	2.56	2.69	2.21	1.27	2.1825	2.21	2.5	3.45	6.89	3.7625
CSS0000579.1	CSS0000579	0.91	0.47	0	0	0.345	0	0	0	0	0	0	0.87	0	0.51	0.345	0	0	0	0	0	1.33	0	0	0.45	0.445
CSS0000580.1	CSS0000580	28.77	31.19	31.62	28.43	30.0025	21.19	31.31	24.72	24.59	25.4525	28.98	26.08	27.46	34.17	29.1725	28.88	26.72	26.57	37.58	29.9375	29.44	24.62	33.12	36.15	30.8325
CSS0000581.1	CSS0000581	0	0	0	0	0	0	0	0	0	0	0	0	0	0	0	0	0	0	0	0	0	0	0	0	0
CSS0000582.1	CSS0000582	24.16	22.9	29.69	20.36	24.2775	16.26	18.23	19.93	15.77	17.5475	15.89	18.8	17.2	15.53	16.855	18.71	16.97	20.95	25.22	20.4625	31.47	27.87	25.46	30.28	28.77
CSS0000583.1	CSS0000583	0	0	0	0	0	0	0	0	0	0	0	0	0	0	0	0	0	0	0	0	0	0	0	0	0
CSS0000584.1	CSS0000584	0	0	0	0	0	0	0	0	0	0	0	0	0.07	0	0.0175	0	0	0	0	0	0	0	0	0	0
CSS0000585.1	CSS0000585	0	0	0	0	0	0	0	0	0	0	0	0	0	0	0	0	0	0	0	0	0	0	0	0	0
CSS0000586.1	CSS0000586	77.72	70.56	52.41	52.69	63.345	38.33	20.76	22.33	17.21	24.6575	32.35	32.92	22.03	27.07	28.5925	39.06	35.08	35.81	22.44	33.0975	43.58	40.59	48.57	34.62	41.84
CSS0000587.1	CSS0000587	11.72	10.48	6.42	8.58	9.3	8.84	7.7	5.67	5.79	7	9.44	9.02	7.27	11.19	9.23	12.17	9.7	8.07	8.52	9.615	10.84	11.82	10.14	6.91	9.9275
CSS0000588.1	CSS0000588	0.9	0	0	0	0.225	0	0	0	0	0	0	0	0	0	0	0	0	0	0	0	0	0	0	0	0
CSS0000589.1	CSS0000589	0	0	0	0	0	0	0	0	0	0	0	0	0	0	0	0	0	0	0	0	0	0	0	0	0
CSS0000590.1	CSS0000590	12.36	10.37	10.9	11.42	11.2625	7.37	8.07	6.16	5.37	6.7425	11.17	8.79	6.64	13.5	10.025	10.54	10.52	7.56	7.24	8.965	9.01	9.57	11.02	7.51	9.2775
CSS0000591.1	CSS0000591	0	0	0	0	0	0.1	0	0	0	0.025	0.13	0.13	0.13	0	0.0975	0	0	0	0	0	0.12	0	0.27	0	0.0975
CSS0000592.1	CSS0000592	0.51	0.88	0.66	0.21	0.565	0.24	0.91	0	0	0.2875	0.22	0	0	0.06	0.07	0	0	0.71	0	0.1775	0.46	0.24	0	0	0.175
CSS0000593.1	CSS0000593	0	0	4	4.2	2.05	0	0	0	0	0	4.09	0	0	0	1.0225	0	0	0	0	0	0	0	0	0	0
CSS0000594.1	CSS0000594	0	28.41	0	0	7.1025	0	0	0	8.37	2.0925	0	0	0	0	0	0	16.57	0	0	4.1425	8.44	0	9.38	8.68	6.625
CSS0000595.1	CSS0000595	0	0	0	0	0	0	0	0	0	0	0	0	0	0	0	0	0	0	0	0	0	0	0	0	0
CSS0000596.1	CSS0000596	0	0	0	0	0	0	0	0	0	0	0	0	0	0	0	0	0	0	0	0	0	0	0	0	0
CSS0000597.2	CSS0000597	0.26	0	1.07	0.37	0.425	0	0	0.24	0.28	0.13	0.18	0	0.22	0	0.1	0	0	0	0	0	0	0	0	0.37	0.0925
CSS0000598.1	CSS0000598	2.32	1.8	1.34	1.95	1.8525	1.19	1.15	1.44	1.39	1.2925	1.39	2.08	0	2.98	1.6125	0.39	0.92	2.21	1.45	1.2425	0.71	2.42	0.32	1.25	1.175
CSS0000599.1	CSS0000599	26.69	27.47	35.84	25.44	28.86	33.34	25.45	38.5	30.55	31.96	33.89	34.9	36.21	39.42	36.105	22.41	26.41	29.19	72.05	37.515	33.8	18.95	34.11	34.98	30.46
CSS0000600.1	CSS0000600	19.88	19	19.29	17.68	18.9625	11.24	10.98	10.13	10.29	10.66	15.59	15.36	11.87	12.81	13.9075	10.64	13.64	11.62	11.37	11.8175	16.29	16.22	17.68	16.46	16.6625
CSS0000601.1	CSS0000601	2.12	0.97	4.28	2.25	2.405	5.22	2.96	3.98	4.78	4.235	5.53	4.81	2.9	2.72	3.99	4.57	3.85	7.13	4.37	4.98	3.51	6.74	3.83	5.49	4.8925
CSS0000602.1	CSS0000602	46.17	43.35	37.81	45.42	43.1875	37.46	40.74	67.16	46.62	47.995	38.08	32.13	48.01	34.71	38.2325	32.44	56.57	54.01	33.68	44.175	13.48	13.29	14.43	21.88	15.77
CSS0000603.1	CSS0000603	1	0	0	0	0.25	0	0.47	0	0	0.1175	0.95	0	0	0	0.2375	0	0.98	0.49	0	0.3675	0	0.5	0	0	0.125
CSS0000604.1	CSS0000604	0	0	0.13	0	0.0325	0	0	0	0.08	0.02	0	0	0	0	0	0	0	0	0.07	0.0175	0	0	0	0	0
CSS0000605.1	CSS0000605	5.57	6.28	4.38	5.62	5.4625	4.15	3.99	2.93	4.26	3.8325	5.29	4.45	3.65	2.76	4.0375	4.95	3.42	2.94	4.09	3.85	4.04	4.61	5.35	5.48	4.87
CSS0000606.1	CSS0000606	2.97	3.1	4.16	3.56	3.4475	2.25	4.01	2.51	2.77	2.885	3.15	2.48	2.69	3	2.83	2.41	2.47	3.53	3.44	2.9625	3.56	3.95	3.87	3.64	3.755
CSS0000607.1	CSS0000607	160.22	185.41	221.13	150.56	179.33	424.4	282.13	218.91	307.15	308.147	169.66	184.8	133.92	185.58	168.49	671.35	406.82	286.21	219.34	395.93	205.64	196.24	154.69	177.22	183.447
CSS0000608.1	CSS0000608	0.23	0.24	0	0	0.1175	0	0.89	0.41	0.79	0.5225	0	0	0.65	0.77	0.355	0	0	0.46	0	0.115	0.45	0.23	0	0.23	0.2275
CSS0000609.1	CSS0000609	0.98	0	0.94	0.72	0.66	0.6	0.24	0.38	0	0.305	1.04	0	0	0	0.26	0.7	0.25	0.65	1.08	0.67	1.69	0.25	0.98	0.86	0.945
CSS0000610.1	CSS0000610	49.18	36.67	52.3	55.63	48.445	41.38	58.2	47.71	53.45	50.185	50.33	41.65	53.26	52.58	49.455	39.25	45	53.7	45.54	45.8725	53.1	63.91	57.25	39.14	53.35
CSS0000611.1	CSS0000611	0	0	0	0	0	0	0	0	0	0	0	0	0	0	0	0	0	0	0	0	0	0	0	0	0
CSS0000612.1	CSS0000612	0	0	0	0	0	0	0	0	0	0	0	0	0	0	0	0	0	1.72	2	0.93	0	0	0	0	0
CSS0000613.1	CSS0000613	0.63	1.52	1.34	0.51	1	0.51	0.75	1.91	0.32	0.8725	0.56	0.72	0.34	0.6	0.555	0.77	0.92	0.95	1.64	1.07	1.64	1.58	1.31	2.06	1.6475
CSS0000614.1	CSS0000614	23.69	22.31	17.32	18.39	20.4275	11.79	13.14	13.8	14.73	13.365	11.38	11.72	11.04	12.35	11.6225	10.1	14.45	14.55	8.47	11.8925	10.38	10.63	13.73	15.63	12.5925
CSS0000615.1	CSS0000615	0.71	0.52	0.62	0.59	0.61	1	0.7	0.63	0.89	0.805	0.55	0.28	0.99	1.01	0.7075	0.29	0.76	0.65	1.28	0.745	1.03	0.78	0.72	0.88	0.8525
CSS0000616.1	CSS0000616	0	0	0	0	0	0	0	0.79	0	0.1975	0	0	0	0	0	0	0	0	0	0	0	0	0	0	0
CSS0000617.1	CSS0000617	0.09	0	0	0	0.0225	0.17	0.09	0	0	0.065	0	0.09	0.09	0	0.045	0	0	0	0.1	0.025	0	0	0	0	0
CSS0000618.1	CSS0000618	11.57	13.17	12.46	11.38	12.145	9.24	9.18	7.79	8.72	8.7325	10.88	8.78	7.9	13.21	10.1925	10.97	8.14	10.04	11.8	10.2375	12.58	16.78	10.04	12.82	13.055
CSS0000619.1	CSS0000619	0	0	0	0	0	0	0	0	0	0	0	0	0.48	0	0.12	0	0	0	0	0	0	0	0	0	0
CSS0000620.1	CSS0000620	2.62	0	7.23	0	2.4625	0	1.51	2.12	0	0.9075	0	0	0	0	0	0	0	0	0	0	0	0	0	0	0
CSS0000621.1	CSS0000621	0	0	0	0	0	0	0	0	0	0	0	0	0	0	0	0	0	0	0	0	0	0	0	0	0
CSS0000622.1	CSS0000622	0.87	0.45	1.21	0.97	0.875	0.56	0.09	1.27	0.27	0.5475	0.57	0.44	0.53	0.62	0.54	0.11	0.37	0.86	0.86	0.55	2.09	1.57	1.44	1.22	1.58
CSS0000623.1	CSS0000623	5.08	4.98	4.64	3.94	4.66	4.95	4.38	2.11	4.25	3.9225	2.57	4.36	3.52	2.66	3.2775	3.31	1.58	2.67	3.93	2.8725	2.07	3.22	4.06	3.93	3.32
CSS0000624.1	CSS0000624	10.29	11.68	6.48	7.94	9.0975	6.43	9.24	8.6	8.51	8.195	7.8	7.57	4.91	9.72	7.5	9.84	10.48	8.05	8.39	9.19	8.71	9.44	7.98	8.17	8.575
CSS0000625.1	CSS0000625	0.17	0.02	0	0.06	0.0625	0	0.23	0.44	0.35	0.255	0	0	0.56	0	0.14	0.02	0	0.13	0.26	0.1025	0.23	0.44	0.21	0.16	0.26
CSS0000626.1	CSS0000626	5.44	4.86	5.37	5.27	5.235	4.26	6.15	4.49	3.76	4.665	4.53	5.86	4.59	6.83	5.4525	4.82	5.31	4.31	3.73	4.5425	3.27	2.65	2.93	3.93	3.195
CSS0000627.1	CSS0000627	3.75	4.16	5.88	4.31	4.525	3.43	2.93	2.98	3.95	3.3225	3.11	3.15	3.8	4.21	3.5675	2.82	2.53	2.99	4.25	3.1475	3.76	3.5	4.24	4.15	3.9125
CSS0000628.1	CSS0000628	2.6	2.07	3.98	2.22	2.7175	1.91	3.19	2.48	2.71	2.5725	2.17	2.46	2.09	3.31	2.5075	3.26	2.72	2.2	2.48	2.665	3.94	3.04	4.24	4.58	3.95
CSS0000629.1	CSS0000629	33.11	29.23	24.09	29.21	28.91	10.8	8.41	19.23	6.09	11.1325	25.25	21.24	15.57	13.09	18.7875	5.4	18.11	8.29	13.77	11.3925	16.31	20.89	34.2	26.09	24.3725
CSS0000630.1	CSS0000630	20.95	18.34	17.5	19.28	19.0175	13.14	11.05	15.06	12.13	12.845	15.91	16.81	14.25	12.79	14.94	12.29	11.98	14.45	13.8	13.13	18.04	17.56	16.05	17.82	17.3675
CSS0000631.1	CSS0000631	18.74	18.87	13.85	16.13	16.8975	20.68	18.88	17.42	16.24	18.305	21.63	18.58	20.46	25.84	21.6275	17.6	17.01	17.6	21.29	18.375	16.12	14.86	18.98	19.69	17.4125
CSS0000632.1	CSS0000632	0	0	0	0	0	0	0	0	0	0	0	0	0	0	0	0	0	0	0	0	0	0	0	0	0
CSS0000633.1	CSS0000633	0	0	0	0	0	0	0	0	0	0	0	0	0	0	0	0	0	0	0	0	0	0	0	0	0
CSS0000634.1	CSS0000634	2.57	1.58	3.93	4.24	3.08	2.55	8.03	6.68	3.31	5.1425	1.71	2.44	5.17	3.3	3.155	5.29	5	4.13	1.61	4.0075	7.6	10.3	10.66	10.27	9.7075
CSS0000635.1	CSS0000635	4.76	5.21	5.17	4.79	4.9825	1.92	2.78	3.04	1.25	2.2475	3.71	2.18	2.65	3.87	3.1025	2.85	3.24	2.8	4.57	3.365	5.5	5.49	4.29	3.94	4.805
CSS0000636.1	CSS0000636	14.5	20.1	21.33	21.74	19.4175	18.3	14.4	17.27	17.34	16.8275	14.4	13.87	13.82	12.32	13.6025	14.38	15.62	14.93	17.64	15.6425	16.79	18.04	16.2	17.26	17.0725
CSS0000637.1	CSS0000637	0	0	0	3.89	0.9725	3.61	0	0	0	0.9025	0	0	0	0	0	0	1.95	0	0	0.4875	3.93	5.81	0	0	2.435
CSS0000638.1	CSS0000638	0.2	0	0	0	0.05	0	0	0	0	0	0	0	0	0	0	0	0	0	0	0	0	0	0	0	0
CSS0000639.1	CSS0000639	46.2	33.59	34.04	41.38	38.8025	41.24	51.45	33.51	41.32	41.88	38.83	49.46	50.39	50.43	47.2775	33.74	41.27	39.89	30.95	36.4625	22.65	32.04	43.22	34.24	33.0375
CSS0000640.1	CSS0000640	0.2	0.83	0.26	0.53	0.455	0.06	0.4	0.3	0.24	0.25	0.07	0.13	0	0.3	0.125	0.27	0.4	0.07	0.21	0.2375	0.65	0.34	0.34	0.26	0.3975
CSS0000641.1	CSS0000641	2.43	1.37	1.13	1.55	1.62	9.46	12.37	4.12	5.74	7.9225	2.55	4.47	2.76	3.9	3.42	11.6	5.93	6.86	3.75	7.035	1.35	1.35	0.99	0.79	1.12
CSS0000642.1	CSS0000642	19.49	16.84	17.34	19.31	18.245	8.5	10.36	8.92	8.8	9.145	13.29	12.76	13.24	10.6	12.4725	11.46	9.26	8.4	9.36	9.62	9.23	8.24	9.99	11.26	9.68
CSS0000643.1	CSS0000643	0.11	0.23	0.22	0.22	0.195	0	0.11	0.1	0	0.0525	0.22	0.32	0	0.61	0.2875	0.22	0.22	0.11	0.12	0.1675	0	0	0	0	0
CSS0000644.1	CSS0000644	9.83	13.37	11.69	9.16	11.0125	15.23	9.15	8.4	6.66	9.86	9.04	12.28	7.56	12.08	10.24	12.04	7.74	7.34	6.99	8.5275	7.94	12.54	8.71	9.54	9.6825
CSS0000645.1	CSS0000645	205.29	235.93	277.37	206.46	231.263	253.93	222.22	266.42	196.96	234.882	263.72	246.84	279.12	269.83	264.877	216.25	208.45	249.28	415.67	272.413	260.9	224.82	269.48	271.18	256.595
CSS0000646.1	CSS0000646	1.25	1.66	2.26	3	2.0425	2.83	3.83	0.79	2.07	2.38	3.11	2.25	1.19	2.56	2.2775	1.25	0.88	0.54	1.5	1.0425	2.43	1.26	2.53	1.22	1.86
CSS0000647.1	CSS0000647	4	4.26	3.55	4.36	4.0425	3.27	2.87	2.04	2.08	2.565	5.47	4.01	3.15	4.13	4.19	1.65	2.18	2.11	1.78	1.93	3.87	4.84	5.15	2.42	4.07
CSS0000648.1	CSS0000648	0.25	0	0	0.12	0.0925	0	0	0	0	0	0	0	0	0	0	0	0	0	0	0	0	0	0	0	0
CSS0000649.1	CSS0000649	16.26	16.35	17.95	17.3	16.965	13.72	16.38	14.53	14.02	14.6625	17.53	15.67	14.21	17.14	16.1375	16.02	18.02	15.51	18.85	17.1	19.43	18.85	20.04	19.05	19.3425
CSS0000650.1	CSS0000650	4.08	5.97	5.15	4.68	4.97	3.76	3.97	2.64	2.27	3.16	4.62	3.72	2.95	3.86	3.7875	4.36	3.92	4.02	3.24	3.885	3.68	3.84	3.22	3.8	3.635
CSS0000651.1	CSS0000651	16.37	15.76	14.6	14.12	15.2125	12.21	15.23	12.98	17.79	14.5525	12.87	11.96	13.07	15.04	13.235	16.48	18.05	16.62	13.28	16.1075	18.41	18.97	15.21	13.47	16.515
CSS0000652.1	CSS0000652	19.22	14.46	14.21	16.27	16.04	9.14	6.59	7.01	3.63	6.5925	9.59	8.7	6.08	6.79	7.79	7.91	8.59	5.63	4.6	6.6825	9.11	12.17	9.52	11.17	10.4925
CSS0000653.1	CSS0000653	0.73	0.61	0.78	0.2	0.58	0.19	0.32	1.36	0.15	0.505	0.45	0.13	0.19	0.14	0.2275	0.27	0.46	0.54	0.62	0.4725	1.22	0.94	0.33	0.71	0.8
CSS0000654.1	CSS0000654	0	0	0.12	0.12	0.06	0	0	0.45	0.15	0.15	0	0	0	0	0	0	0.25	0	0	0.0625	0	0	0.38	0	0.095
CSS0000655.1	CSS0000655	41.37	39.92	41.56	32.23	38.77	21.16	19.45	20.07	14.54	18.805	26.08	24.42	25.09	27.38	25.7425	19.4	20.84	17.35	19.46	19.2625	36.59	35.27	34.92	31.89	34.6675
CSS0000656.1	CSS0000656	0.18	0	0.23	0.04	0.1125	0.87	1.55	1.27	1.3	1.2475	0.17	0.04	0	0	0.0525	0.85	0.74	1.78	1.47	1.21	1.38	1.5	1.47	1.04	1.3475
CSS0000657.1	CSS0000657	12.82	15.03	12.59	12.43	13.2175	8.65	10.23	13.94	8.86	10.42	16.25	12.01	13.5	20.63	15.5975	11.4	10.37	12.73	22.72	14.305	16.49	12.9	16.61	19.16	16.29
CSS0000658.1	CSS0000658	0	0	0	0	0	0	0	0	0	0	0	0	0	0	0	0	0	0	0	0	0	0	0	0	0
CSS0000659.1	CSS0000659	0	0	0	0	0	0	0	0	0	0	0	0	0	0	0	0	0	0	0	0	0	0.12	0	0	0.03
CSS0000660.1	CSS0000660	0.07	0.07	0	0	0.035	0	0	0	0	0	0	0	0.38	0	0.095	0	0	0	0	0	0.06	0	0	0	0.015
CSS0000661.1	CSS0000661	0	0	0	0	0	0	0	0	0	0	0	0	0	0	0	0	0	0	0	0	0	0	0	0	0
CSS0000662.1	CSS0000662	35.35	46.31	41	52.34	43.75	47.26	41.08	54.91	73.15	54.1	34.25	43.58	56.49	35.02	42.335	48.1	46.46	41.02	29.43	41.2525	28.22	24.02	35.42	24.26	27.98
CSS0000663.1	CSS0000663	17.13	17.46	16.44	17	17.0075	26.12	20.36	23.87	21.48	22.9575	22.29	17.23	19.03	17.58	19.0325	25.21	21.23	25.53	15.29	21.815	13.28	17.59	13.89	15.99	15.1875
CSS0000664.1	CSS0000664	0.47	0.36	0.34	0.58	0.4375	0	0.69	0.42	0.41	0.38	0.11	0.46	0.34	0.13	0.26	0.35	0.58	0.6	0.37	0.475	0.8	0.83	0.12	1.26	0.7525
CSS0000665.1	CSS0000665	34.37	34.16	32.09	34.45	33.7675	28.22	36.06	32.61	34.17	32.765	27.22	29.74	29.77	33.18	29.9775	28.4	32.28	30.81	29.51	30.25	28.22	34.19	32.93	29.65	31.2475
CSS0000666.1	CSS0000666	0.62	0.64	0.61	0.82	0.6725	0.32	0.41	0.06	0.81	0.4	0.07	0.47	0.07	0.83	0.36	1.25	0.21	0.35	0.36	0.5425	0.27	0.35	0.28	0.2	0.275
CSS0000667.1	CSS0000667	0	0	0	0	0	1.64	1.67	0	0	0.8275	1.71	3.44	0	0	1.2875	0	1.77	0	0	0.4425	0	1.76	0	0	0.44
CSS0000668.1	CSS0000668	0	0	0	0	0	0	0	0	0	0	0	0	0	0	0	0	0	0	0	0	0	0	0	0	0
CSS0000669.1	CSS0000669	0.69	0.81	0.72	0.77	0.7475	0.34	0.54	0.53	0.7	0.5275	0.89	0.45	0.84	0.56	0.685	0.88	0.5	0.33	0.77	0.62	1.07	0.56	0.69	1.12	0.86
CSS0000670.1	CSS0000670	0	14.49	0	0	3.6225	0	11.41	10.16	25.17	11.685	0	36.96	0	0	9.24	12.31	0	23.72	74.57	27.65	25.66	0	0	0	6.415
CSS0000671.1	CSS0000671	22.43	27.77	24.38	25.79	25.0925	21.41	20.87	19	24.39	21.4175	20.33	22.28	20	21.69	21.075	10.58	8.4	14.05	16.35	12.345	10.79	9.9	17.35	24.37	15.6025
CSS0000672.1	CSS0000672	475.75	532.44	405.97	426.23	460.098	396.62	269.93	260.08	289.9	304.132	296.22	264.24	182.14	281.47	256.018	372.5	331.34	299.07	288.55	322.865	416.93	402.85	356.54	324.63	375.237
CSS0000673.1	CSS0000673	0	0	0	0	0	0	0	0	0	0	0	0	0.19	0.11	0.075	0	0.1	0	0	0.025	0	0	0	0	0
CSS0000674.1	CSS0000674	0	0	0	0	0	0	0	0	0	0	0	0	0	0	0	0	0	0	0	0	0	0	0	0	0
CSS0000675.1	CSS0000675	0.49	0.78	0.63	2.19	1.0225	0.35	0.92	0	0.44	0.4275	1.1	0.22	0.41	0.21	0.485	0	0.22	1.05	0.4	0.4175	0.25	0.19	0.49	1.11	0.51
CSS0000676.1	CSS0000676	7.54	7.3	7.04	7.14	7.255	6.51	7.75	6.86	5.92	6.76	9.18	8.23	7.28	10.14	8.7075	7.2	7.68	7.65	11.37	8.475	10.2	8.6	9.01	9.13	9.235
CSS0000677.1	CSS0000677	0	0	0	0	0	0	0	0	0	0	0	0	0	0	0	0	0	0	0	0	0	0	0	0	0
CSS0000678.1	CSS0000678	5.84	4.36	5.74	5.79	5.4325	2.59	5.47	5.59	3.76	4.3525	5.59	4.62	4.29	4.85	4.8375	4.19	5.66	5.86	6.52	5.5575	6.61	5.62	4.14	5.87	5.56
CSS0000679.1	CSS0000679	17.38	18.47	9.37	9.03	13.5625	3.15	1.94	0.73	0.28	1.525	21	11.04	6.94	19.22	14.55	1.82	2.45	5.66	1.31	2.81	9.76	10.06	6.74	4.57	7.7825
CSS0000680.1	CSS0000680	12.35	6.93	7	4.02	7.575	26.25	4.63	2.79	2.68	9.0875	34.31	32.03	18.67	58.01	35.755	12.1	4.83	0.8	7.98	6.4275	4.02	3.24	11.93	0.82	5.0025
CSS0000681.1	CSS0000681	0	0	0	0	0	0	0	0	0	0	0	0	0	0	0	0	0	0	0	0	0	0	0	0	0
CSS0000682.1	CSS0000682	283.33	276.48	310.85	307.02	294.42	306.55	311.17	331.8	263.1	303.155	304.91	284.42	316.78	288.2	298.577	242.78	327.43	310.21	386.05	316.618	334.88	310.14	306.71	366.72	329.613
CSS0000683.1	CSS0000683	1.36	0.47	1.03	1.26	1.03	0.7	0.67	0.87	1.23	0.8675	0.66	0.95	1.59	1.48	1.17	1.44	1.27	0.92	1.72	1.3375	0.8	0.84	0.98	1.24	0.965
CSS0000684.1	CSS0000684	0.84	1.07	1.99	0.34	1.06	0.48	2.16	1.21	1.19	1.26	1.13	5.59	3.52	1.05	2.8225	0.34	1.19	1.91	2.41	1.4625	2.5	2.22	2.25	1.55	2.13
CSS0000685.1	CSS0000685	7.93	7.88	7.73	7.32	7.715	6.13	7.36	6.7	5.11	6.325	7.21	6	6.07	8.87	7.0375	7.95	7.33	7.03	7.31	7.405	9.69	10.37	8.34	7.77	9.0425
CSS0000686.1	CSS0000686	0.06	0.12	0.11	0.04	0.0825	0.08	0	0.24	0.28	0.15	0.11	0.07	0.1	0.15	0.1075	0.03	0	0.14	0.07	0.06	0	0	0	0.18	0.045
CSS0000687.1	CSS0000687	4.61	4.21	2.28	4.39	3.8725	4.17	5.23	2.41	2.38	3.5475	3.89	4.24	2.59	4.39	3.7775	4.33	2.96	3.42	4.02	3.6825	3.46	3.7	3.73	2.97	3.465
CSS0000688.1	CSS0000688	10.75	3.66	4	3.98	5.5975	7.27	2.33	1.27	2.14	3.2525	12.31	9.2	4.56	8.87	8.735	5.9	3.34	3.99	1.23	3.615	3.33	3.18	2.67	1.55	2.6825
CSS0000689.1	CSS0000689	0	0	0	0	0	39.3	12.81	0	14.11	16.555	40.88	0	0	0	10.22	0	0	13.32	33.58	11.725	0	55.12	0	0	13.78
CSS0000690.1	CSS0000690	0	0	0	0	0	0	0	0	0	0	0.18	0	0	0	0.045	0	0	0	0	0	0	0	0	0	0
CSS0000691.1	CSS0000691	31.37	20.55	23.04	21.1	24.015	24.4	20.15	14.71	16.43	18.9225	26.07	23.97	19.29	22.58	22.9775	21.25	23.23	17.13	19	20.1525	26.95	36.54	20.82	24.09	27.1
CSS0000692.1	CSS0000692	0	0	0	0	0	0	0	0	0	0	0	0	0	0	0	0	0	0	0	0	0	0	0	0	0
CSS0000693.1	CSS0000693	0	6.39	5.01	3.12	3.63	4.5	9.56	0	9.45	5.8775	3.92	8.24	7.85	7.09	6.775	4.79	6.19	5.16	6.21	5.5875	0.78	2.25	0	4.12	1.7875
CSS0000694.1	CSS0000694	0.41	0	0	0.12	0.1325	0	0	0	0	0	0	0	0	0	0	0	0	0	0	0	0	0	0	0	0
CSS0000695.1	CSS0000695	3.11	4.74	5.04	4.63	4.38	2.11	2.58	3.18	2.4	2.5675	2.46	2.73	4.05	2.88	3.03	2.08	3.8	3.34	4.01	3.3075	5.01	2.95	4.72	3.47	4.0375
CSS0000696.3	CSS0000696	7.51	8.95	7.9	9.83	8.5475	8.21	10.69	6.68	7.76	8.335	8.06	8.6	7.33	10.64	8.6575	9.69	8.45	9.37	9.23	9.185	8.34	8.73	8.83	8.79	8.6725
CSS0000697.1	CSS0000697	9.28	8.37	7.45	7.26	8.09	5.73	5.51	4.49	3.91	4.91	8.02	6.5	4.48	6.84	6.46	8.54	6.08	5.93	5.9	6.6125	5.81	7.32	6.17	6.11	6.3525
CSS0000698.1	CSS0000698	34.99	38.17	39.6	34.41	36.7925	52.65	45.66	41.44	46.4	46.5375	38.97	38.71	43.41	40.44	40.3825	41.34	35.14	36.76	59.55	43.1975	37.65	47.4	30.51	39.18	38.685
CSS0000699.1	CSS0000699	7.91	10.57	8.07	5.13	7.92	5.12	4.66	3.86	3.24	4.22	6.34	6.72	5.82	10.43	7.3275	5.57	3.45	7.47	4.52	5.2525	9.19	6.24	3.04	4.8	5.8175
CSS0000700.1	CSS0000700	29.35	25.98	36.53	34.46	31.58	41.66	38.46	38.63	37.78	39.1325	29.56	31.19	31.32	29	30.2675	32.06	33.08	35.01	42.86	35.7525	23.79	25.13	32.05	30.49	27.865
CSS0000701.1	CSS0000701	20.42	19.38	18.67	18.66	19.2825	10.37	9.67	12.36	7.98	10.095	12.96	11.78	10.87	9.47	11.27	10.53	12.61	8.52	15.09	11.6875	20.01	20.67	15.51	18.29	18.62
CSS0000702.1	CSS0000702	0.11	0.29	0.35	0.24	0.2475	0.3	0.24	0.28	0.21	0.2575	0.21	0.38	0.24	0.85	0.42	0.32	0.28	0.36	0.48	0.36	0.31	0.43	0.53	0.58	0.4625
CSS0000703.1	CSS0000703	0	0	0	0	0	0	0	0	0	0	0	0	0	0	0	0	0	0	0	0	0	0	0	0	0
CSS0000704.1	CSS0000704	0	0	0	0	0	0.53	0.09	0.17	0.43	0.305	0	0	0	0	0	0.38	0.49	0.19	0	0.265	0.55	0.28	0.38	0.74	0.4875
CSS0000705.1	CSS0000705	318.85	304.09	332.52	304.81	315.067	328.9	340.96	362.5	271.91	326.067	399.98	322.79	363.93	308.01	348.678	290.92	341.12	329.11	401.37	340.63	423.48	406.18	303.04	403.26	383.99
CSS0000706.1	CSS0000706	20.98	26.59	34.71	26.55	27.2075	24.59	22.36	29.99	19.62	24.14	30.49	27.74	28.96	31.48	29.6675	25.65	28.12	25.97	48	31.935	35.92	29.87	35.33	35.61	34.1825
CSS0000707.1	CSS0000707	13.57	11.09	7.85	9.64	10.5375	7.53	6.77	7.14	4.32	6.44	10.54	9.08	7.86	12.84	10.08	3.77	5.57	6.26	5.71	5.3275	12.78	10.81	11.2	7.54	10.5825
CSS0000708.1	CSS0000708	0.04	0.07	0	0.07	0.045	0.03	0.03	0	0	0.015	0	0.07	0	0.04	0.0275	0.04	0	0	0	0.01	0.07	0.07	0	0.07	0.0525
CSS0000709.1	CSS0000709	1.82	1.3	1.19	0.89	1.3	2.8	1.04	1.22	3.56	2.155	2.56	2.51	2.25	1.55	2.2175	3.98	2.7	2.1	1.3	2.52	0.9	0.47	1.28	0.46	0.7775
CSS0000710.1	CSS0000710	96.88	97.04	84.29	94.94	93.2875	43.44	62.78	64.96	32.16	50.835	70.15	60.8	67.65	71.54	67.535	29.75	56.46	42.42	41.5	42.5325	59.08	56.3	82.19	69.59	66.79
CSS0000711.1	CSS0000711	0.14	0.07	0	0.28	0.1225	0.2	0.14	0.19	0.16	0.1725	0.07	0.07	0.07	0	0.0525	0.35	0.07	0.14	0.07	0.1575	0.2	0.14	0.35	0.2	0.2225
CSS0000712.1	CSS0000712	0	0	0	0	0	0	0.37	1.01	0.43	0.4525	0	0	0.72	0	0.18	0	0	0	0	0	0	0	0	0	0
CSS0000713.1	CSS0000713	0	0	0	0	0	0	0	0	0	0	0	0	0	0	0	0	0	0	0	0	0	0	0	0	0
CSS0000714.1	CSS0000714	23.58	22.38	25.41	23.4	23.6925	28.68	34	25.24	26.56	28.62	28.44	27.19	28.87	30.82	28.83	25.19	31.43	32.19	33.26	30.5175	31.23	27.66	29.75	32.81	30.3625
CSS0000715.1	CSS0000715	0	0	0	0	0	0	0	0	0	0	0	0	0	0	0	0	0	0	0	0	0	0	0	0	0
CSS0000716.1	CSS0000716	5.51	5.96	6.55	5.42	5.86	2.76	2.55	4.33	3.32	3.24	5.1	5.09	4.43	4.53	4.7875	3.72	3.9	4.18	5.49	4.3225	8.51	6.43	6.76	7.74	7.36
CSS0000717.1	CSS0000717	124.26	113.22	119.47	126.39	120.835	148.47	158.06	145.67	152.62	151.205	124.7	145.24	126.85	147.98	136.192	128	131.64	133.52	132.5	131.415	82.53	100.05	129.58	117.12	107.32
CSS0000718.1	CSS0000718	15.8	11.83	13.28	16.89	14.45	13.16	16.84	14.28	18.28	15.64	13	13.43	11.89	17.41	13.9325	15.53	12.62	14.47	17.99	15.1525	8.88	12.88	15.03	15.45	13.06
CSS0000719.1	CSS0000719	0	0.2	0	0	0.05	0	0	0	0	0	0	0	0	0	0	0	0	0	0	0	0	0	0	0	0
CSS0000720.1	CSS0000720	79.58	76.25	58.96	76.46	72.8125	16.76	6.96	20.22	5.86	12.45	27.27	17.97	18.57	11.28	18.7725	11.06	19.18	9.47	12.01	12.93	43.72	42.68	37.24	34.45	39.5225
CSS0000721.1	CSS0000721	0	0	0	0	0	0	0	0	0	0	0	0	0	0	0	0	0	0	0	0	0	0	0	0	0
CSS0000722.1	CSS0000722	0	0	0	0	0	0	0	0	0	0	0	0	0	0	0	0	0	0	0	0	0	0	0	0	0
CSS0000723.1	CSS0000723	0	0	0	0	0	0	0	0	0	0	0	0	0	0	0	0	0	0	0	0	0	0	0	0	0
CSS0000724.1	CSS0000724	0.11	0.28	0.21	0.53	0.2825	0.15	0.43	0.29	0.32	0.2975	0.37	0.26	0.26	0.18	0.2675	0.27	0.32	0.33	0.47	0.3475	0.27	0.67	0.42	0.16	0.38
CSS0000725.1	CSS0000725	0	0	0	0	0	0	0	0	0	0	0	0	0	0	0	0	0	0	0	0	0	0	0	0	0
CSS0000726.1	CSS0000726	33.58	35.05	26.67	29.91	31.3025	22.86	25.01	22.2	16.38	21.6125	23.03	21.95	24.01	29.62	24.6525	18.97	19.54	20.4	20.38	19.8225	21.39	29.87	31.26	32.56	28.77
CSS0000727.1	CSS0000727	121.69	129.49	137.63	118.76	126.892	102.47	122.15	133.62	105.41	115.912	118.65	125.12	123.06	127.47	123.575	108.56	117.45	123.92	191.9	135.458	149.85	133.92	139.58	164.98	147.083
CSS0000728.1	CSS0000728	0	0.18	0	0	0.045	0	0	0	0	0	0	0	0	0.2	0.05	0	0	0	0	0	0	0	0	0	0
CSS0000729.1	CSS0000729	0.2	0.76	0.45	0.32	0.4325	0.06	0.26	0.18	0.28	0.195	0	0	0	0.23	0.0575	0.13	0.26	0	0.29	0.17	0.99	0.52	0.51	0.42	0.61
CSS0000730.1	CSS0000730	0	0	0	0	0	0	0	0	0	0	0	0	0	0	0	0	0	0	0	0	0	0	0	0	0
CSS0000731.1	CSS0000731	128.78	154.36	196.76	138.7	154.65	76.02	74.19	185.51	57.81	98.3825	154.44	106.69	140.08	106.57	126.945	76.09	100.45	80.43	277.36	133.583	187.61	153.06	159.04	180.63	170.085
CSS0000732.1	CSS0000732	14.55	17.1	15.26	13.55	15.115	9.47	8.78	9.92	7.13	8.825	12.06	13.54	12.27	16.35	13.555	8.76	10.52	9.89	11.52	10.1725	13.95	11.03	11.76	8	11.185
CSS0000733.1	CSS0000733	16.6	20.1	11.84	17.09	16.4075	91.19	92.14	108.71	251.99	136.007	65.77	118.93	159.64	80.12	106.115	107.56	118.64	155.15	36.85	104.55	32.66	21.07	42.83	24.43	30.2475
CSS0000734.1	CSS0000734	0	0	0.32	0	0.08	0	0.16	0	0.38	0.135	0.31	0	0	0.18	0.1225	0.16	0	0.16	0	0.08	0	0	0	0	0
CSS0000735.1	CSS0000735	1.56	2.46	2.95	0	1.7425	2.13	0.73	0.66	0	0.88	0.74	0	0.71	0	0.3625	0.76	2.29	0	0	0.7625	3.04	0	1.61	3.11	1.94
CSS0000736.1	CSS0000736	0	0	0	0	0	0	0	0	0	0	0	0	0	0	0	0	0	0	0	0	0	0	0	0	0
CSS0000737.1	CSS0000737	24.24	30.08	23.63	26.3	26.0625	27.18	29.74	15.27	19.42	22.9025	23.54	23.59	20.51	29.26	24.225	19.05	23.39	20.28	29.79	23.1275	24.58	19.63	26.94	26.74	24.4725
CSS0000738.1	CSS0000738	31.73	35.3	19.9	31.97	29.725	22.04	21.44	14.36	8.71	16.6375	19.83	20.07	21.4	24.54	21.46	17.91	17.43	12.43	12.5	15.0675	24.88	41.9	23.01	22.03	27.955
CSS0000739.1	CSS0000739	553.94	595.11	710.1	554.03	603.295	660.53	641.83	731.34	599.42	658.28	702.29	628.76	678.04	676.86	671.487	592.13	591.68	619.17	921.85	681.207	693	586.65	672.68	742.53	673.715
CSS0000740.1	CSS0000740	7.51	7.31	6.91	5.95	6.92	5.61	6.69	5.89	5.68	5.9675	6.19	8.48	6.27	9.35	7.5725	5.5	6.89	6.99	6.25	6.4075	6.79	8.91	7.03	8.71	7.86
CSS0000741.1	CSS0000741	0	0	0.51	0	0.1275	0	0	0.23	0.6	0.2075	0	0	0	0	0	0	0.78	0	0	0.195	0	0	0	0.26	0.065
CSS0000742.1	CSS0000742	0.03	0.03	0	0.01	0.0175	0.14	0.08	0.19	0.04	0.1125	0	0	0.1	0.06	0.04	0.28	0	0.15	0	0.1075	0.03	0	0.03	0.03	0.0225
CSS0000743.1	CSS0000743	1.05	0	0	0	0.2625	0	0	0	0	0	0	0	0	0	0	0	0	0	0	0	0	0	0	0	0
CSS0000744.1	CSS0000744	32.1	25.14	20.58	20.22	24.51	6.36	4.64	12.58	9.12	8.175	10.66	9.76	5.08	5.5	7.75	7.59	11.89	8.59	13.55	10.405	16.43	15.44	19.66	14.13	16.415
CSS0000745.1	CSS0000745	2.33	3.05	1.76	1.97	2.2775	4.35	5.76	3.97	5.18	4.815	3.51	4.63	2.42	3.38	3.485	6.1	4.4	4.01	3.48	4.4975	4.31	2.68	2.2	1.88	2.7675
CSS0000746.1	CSS0000746	0.05	0	0	0.09	0.035	0.21	0.09	0	0.05	0.0875	0.26	0	0.13	0.1	0.1225	0.05	0	0.19	0.14	0.095	0.05	0.04	0.09	0	0.045
CSS0000747.1	CSS0000747	0.3	0.08	0.44	0	0.205	0.49	1.18	0.67	0.26	0.65	0.15	0.22	0.65	0.08	0.275	0.53	0	0.23	0.16	0.23	0.07	0.38	0.38	0.89	0.43
CSS0000748.1	CSS0000748	40.94	44.31	43.9	42.05	42.8	31.18	35.04	41.09	32.64	34.9875	36.67	36.8	34.17	36.17	35.9525	36.98	39.71	36.17	50.56	40.855	55.88	52.02	46.68	51.36	51.485
CSS0000749.1	CSS0000749	0	0	0	0	0	0	0	0	6.42	1.605	0	0	0	0	0	0	0	0	0	0	0	0	0	0	0
CSS0000750.1	CSS0000750	0.28	0.29	0.27	0.27	0.2775	0.09	0.09	0.16	0	0.085	0.09	0.09	0.09	0.1	0.0925	0.37	0.18	0.28	0.58	0.3525	0.09	0	0.93	0.45	0.3675
CSS0000751.1	CSS0000751	10.76	10.16	8.34	10.96	10.055	8.26	7.45	9.23	8.47	8.3525	12.18	9.15	8.89	9.66	9.97	9.12	10.73	10.21	10.75	10.2025	9.16	10.01	8.49	11.31	9.7425
CSS0000752.1	CSS0000752	0	0	0	0	0	0	1.74	1.57	1.99	1.325	0	1.8	3.36	0	1.29	0	0	0	2.1	0.525	0	1.85	0	0	0.4625
CSS0000753.1	CSS0000753	66.67	34.68	112.83	193.23	101.852	152	112.28	163.8	203.95	158.007	101.14	69	179.44	126.39	118.992	143.11	204.52	72.81	101.79	130.558	65.61	80.18	81.47	91.62	79.72
CSS0000754.1	CSS0000754	2.01	2.69	2.24	2.34	2.32	1.8	2.71	2.49	1.84	2.21	2.74	2.3	2.17	2.4	2.4025	2.47	2.59	2.43	4.13	2.905	3.72	3.55	3.04	3.39	3.425
CSS0000755.1	CSS0000755	0	0	0	0	0	0	0	0	0	0	0	0	0	0	0	0	0	0	0	0	0	0	0	0	0
CSS0000756.1	CSS0000756	39.12	46.33	54.76	44.68	46.2225	32.08	43.6	40.11	33.87	37.415	51.39	40.68	39.58	34.85	41.625	26.1	55.92	44.17	55.68	45.4675	36.33	27.14	43.6	38.13	36.3
CSS0000757.1	CSS0000757	13.96	12.39	12.02	14.44	13.2025	8.66	9.55	10	7.83	9.01	10.71	8.98	8.86	9.73	9.57	7.38	9.37	12.14	9.17	9.515	11.43	14.35	11.94	13.29	12.7525
CSS0000758.1	CSS0000758	0	0	0.1	0	0.025	0	0	0.1	0	0.025	0	0.21	0	0	0.0525	0	0.11	0	0	0.0275	0	0	0	0	0
CSS0000759.1	CSS0000759	0	0.49	0	1.85	0.585	0.43	0	0	0	0.1075	0	0.45	0.44	0	0.2225	0	0.46	0.47	0.5	0.3575	0	0	0.48	0	0.12
CSS0000760.1	CSS0000760	3.11	3.21	2.13	3.29	2.935	3.77	8.85	0.48	1.68	3.695	10.2	16.35	5.81	3.22	8.895	2.1	2.93	2.56	2.11	2.425	1.42	3.5	0.92	2.86	2.175
CSS0000761.1	CSS0000761	0.41	0.28	0.39	0.93	0.5025	0.5	0	0	0.16	0.165	0.13	0	0	0	0.0325	0	0.13	0	0.28	0.1025	0.13	0.27	0.41	0.4	0.3025
CSS0000762.1	CSS0000762	5.86	0.69	3.65	1.27	2.8675	2.35	1.8	2.7	2.07	2.23	1.84	0.61	4.64	0.75	1.96	0.63	0.63	1.24	0	0.625	1.27	1.9	0.68	3.91	1.94
CSS0000763.1	CSS0000763	0.99	1.07	0.9	1.39	1.0875	0.79	1.09	0.82	0.89	0.8975	1.27	1.02	0.51	1.02	0.955	1.13	1.08	0.63	0.87	0.9275	1.07	0.89	1.25	1.2	1.1025
CSS0000764.1	CSS0000764	0	0	0	0	0	0.18	0	0.09	0.45	0.18	0	0	0	0	0	1.31	0.43	0.2	0.1	0.51	0	0.2	0	0.09	0.0725
CSS0000765.1	CSS0000765	0.3	0	0.28	0	0.145	0	0.42	0.42	0	0.21	0.27	0.07	0.07	0	0.1025	0.33	0.37	0.15	0	0.2125	0.21	0.07	0.43	0	0.1775
CSS0000766.1	CSS0000766	6.03	8.62	9.12	3.85	6.905	5.42	5.43	11.49	4.16	6.625	3.76	3.8	3.53	4.7	3.9475	3.87	1.95	7.56	2.21	3.8975	17.85	3.87	6.37	6.06	8.5375
CSS0000767.1	CSS0000767	14.42	18.31	13.53	16.6	15.715	15.42	28.91	18.58	15.95	19.715	16.57	16.47	21.42	26.08	20.135	10.42	17.59	18.35	18.03	16.0975	8.8	13.28	19.93	15.44	14.3625
CSS0000768.1	CSS0000768	0.96	0.14	0.6	0.47	0.5425	0.19	0.34	0.67	0.56	0.44	0.53	0.6	0.92	0.45	0.625	0.83	0.61	0	0.78	0.555	0.53	0.62	0.55	0.53	0.5575
CSS0000769.1	CSS0000769	15.69	15.62	13.15	24.69	17.2875	5.55	11.42	8.09	17.9	10.74	12.37	12.4	8.68	17.86	12.8275	11.09	5.11	16.87	17.86	12.7325	13.61	22.28	14.46	13.92	16.0675
CSS0000770.1	CSS0000770	0.93	2.18	0.6	1.96	1.4175	0.14	1.2	0.69	0.71	0.685	0.3	0.3	0.73	0.89	0.555	0	0.15	0.16	0.32	0.1575	1.05	0.31	1.03	0.31	0.675
CSS0000771.1	CSS0000771	9.82	9.98	8.41	8.71	9.23	10.71	20.58	23.77	28.4	20.865	15.71	24.54	39.29	29.27	27.2025	9.24	17.82	27.14	16.71	17.7275	13.84	10.31	15.8	12.3	13.0625
CSS0000772.1	CSS0000772	0	0	0	0	0	0	0	0	0	0	0	0	0	0	0	0	0	0	0	0	0	0	0	0	0
CSS0000773.1	CSS0000773	5.5	3.37	3.81	4.37	4.2625	0.99	3.62	2.91	1.47	2.2475	2.15	4.19	4.35	2.55	3.31	1.48	2.09	2.57	4.29	2.6075	4.2	3.2	3.29	4.31	3.75
CSS0000774.1	CSS0000774	6.7	5.1	8.76	6.3	6.715	3.66	1.98	6.57	3.52	3.9325	4.08	6.6	6.79	3.99	5.365	2.48	5.02	5.15	9.7	5.5875	11.55	10.85	10.09	10.2	10.6725
CSS0000775.1	CSS0000775	2.56	4.51	2.72	3.78	3.3925	0.95	3.72	2.92	4.08	2.9175	5.67	5.91	3.87	2.55	4.5	4.34	6.56	1.54	4.04	4.12	7.96	4.12	5.45	7.54	6.2675
CSS0000776.1	CSS0000776	18.68	21.67	19.69	21.13	20.2925	16.57	19.47	20.42	16.35	18.2025	23.62	21.14	22.18	24.57	22.8775	18.73	19.88	19.6	28.5	21.6775	33.99	29.91	28.85	31.82	31.1425
CSS0000777.1	CSS0000777	10.58	9.52	9.27	8.75	9.53	8.88	10.88	8.04	9.74	9.385	11.39	9.77	6.32	8.82	9.075	11.55	9.78	10.07	8.24	9.91	11.24	9.85	8.8	10.85	10.185
CSS0000778.1	CSS0000778	0	0.43	0.2	0	0.1575	0.2	0	0.18	0	0.095	0.61	0.4	0	0	0.2525	0	0	0.21	0	0.0525	1.02	0.21	0	0	0.3075
CSS0000779.1	CSS0000779	0	0	0	0	0	0	0	0	0	0	0	0	0	0	0	0	0	0	0	0	0	0	0	0	0
CSS0000780.1	CSS0000780	0	0	0	0.48	0.12	0	0.4	0.58	0	0.245	0	0.16	0.47	0	0.1575	0	0	0	0	0	0	0	0	0.24	0.06
CSS0000781.1	CSS0000781	0.05	0	0	0	0.0125	0.1	0	0	0	0.025	0	0	0	0	0	0	0	0.11	0	0.0275	0.05	0	0	0	0.0125
CSS0000782.1	CSS0000782	27.5	26.86	26.83	30.01	27.8	12.21	12.8	10.85	6.87	10.6825	19.27	16.76	13.3	19.24	17.1425	12.18	13.76	10.48	10.99	11.8525	20.99	22.21	26.7	23.14	23.26
CSS0000783.1	CSS0000783	44.7	36.83	33.85	47.65	40.7575	42.6	32.4	34.89	39.71	37.4	36.36	33.07	32.86	45.97	37.065	42.65	41.25	41.79	39.8	41.3725	34.29	38.32	42.27	37.02	37.975
CSS0000784.1	CSS0000784	3.35	0	0	0	0.8375	0	0	0	0	0	0	0	0	0	0	0	0	0	0	0	6.55	0	0	0	1.6375
CSS0000785.1	CSS0000785	1.65	4.13	0.91	3.01	2.425	2.62	3.19	1.03	1.34	2.045	3.85	1.3	2.44	5.45	3.26	3.05	2.55	1.02	4.93	2.8875	3.88	1.18	3.8	2.07	2.7325
CSS0000786.1	CSS0000786	5.78	5.65	6.15	6.14	5.93	6.32	4.51	4.31	4.09	4.8075	5.44	4.96	5.51	7.21	5.78	7.29	7.26	6.45	7.85	7.2125	6.82	6.88	5.73	7.43	6.715
CSS0000787.1	CSS0000787	0	0	0.29	0.32	0.1525	0.55	0	0.31	0	0.215	0.11	0	0	0.58	0.1725	0.15	0.37	0.24	0.73	0.3725	0.57	0.34	0.45	0	0.34
CSS0000788.1	CSS0000788	0	0	0	0.16	0.04	0	0	0	0	0	0	0	0	0.18	0.045	0	0	0	0	0	0	0	0	0	0
CSS0000789.1	CSS0000789	0	0	0	0	0	0	0	0	0	0	0	0	0	0	0	0	0	0	0	0	0	0	0	0	0
CSS0000790.1	CSS0000790	4.32	4.6	5.87	4.67	4.865	5.49	5.12	8.53	5.64	6.195	6.05	5.42	5.48	4.26	5.3025	4.9	5.03	6.9	7.87	6.175	5.78	5.08	6.58	9.31	6.6875
CSS0000791.1	CSS0000791	6.24	7.54	4.43	5.22	5.8575	2.18	2.22	2.29	1.98	2.1675	2.57	2.62	1.87	3.44	2.625	2.74	3.2	2.49	2.72	2.7875	4.18	4.12	4.13	4.7	4.2825
CSS0000792.1	CSS0000792	22.98	23.26	22.51	22.17	22.73	20.05	25.3	24.09	20.6	22.51	22.75	23.46	22.54	25.73	23.62	23.28	24.16	24.09	26.96	24.6225	36.18	33.05	28.63	27.86	31.43
CSS0000793.1	CSS0000793	82.65	83.04	86.69	80.25	83.1575	69.39	86.64	89.51	72.61	79.5375	78.31	77.58	79.09	82.76	79.435	79.67	95.16	89.2	112.37	94.1	136.66	119.63	100.78	99.92	114.247
CSS0000794.1	CSS0000794	0.11	0.11	0.31	0.11	0.16	0	0	0	0	0	0	0.1	0	0	0.025	0	0	0	0	0	0	0	0	0	0
CSS0000795.1	CSS0000795	6.72	5.74	4.03	6.33	5.705	2.46	3.08	3.38	2.18	2.775	6.13	3.46	3.88	4.51	4.495	2.77	4.04	2.02	3.18	3.0025	6.9	9.02	5.43	5.99	6.835
CSS0000796.1	CSS0000796	25.27	21.44	19.15	21.33	21.7975	20.69	23.91	22.29	18.41	21.325	18.08	16.02	14.95	21.75	17.7	24.74	19.94	23.7	25.94	23.58	21.1	28.46	19.18	28.76	24.375
CSS0000797.1	CSS0000797	0.31	0.82	0.08	1.04	0.5625	0.08	0.44	0.65	0.69	0.465	0.12	0.82	0.31	0.76	0.5025	0.19	0.12	0.21	0	0.13	0.3	0.58	0.58	0.45	0.4775
CSS0000798.1	CSS0000798	44.46	48.72	48.58	51.35	48.2775	38.75	21	30.11	15.16	26.255	39.93	32.05	26.87	26.73	31.395	34.19	31.11	24.79	25.96	29.0125	48.26	42.49	31.86	33.2	38.9525
CSS0000799.1	CSS0000799	6.36	5.65	5.23	5.16	5.6	4.3	6.29	3.04	5	4.6575	5.8	4.4	5	7.02	5.555	5.26	4.66	5.27	6.62	5.4525	5.82	7.12	6.6	5.74	6.32
CSS0000800.1	CSS0000800	0	1.56	4.35	0	1.4775	0	0	0	0	0	0	0	0	0	0	0	0	0	0	0	0	0	0	0	0
CSS0000801.1	CSS0000801	18.19	12.29	11.62	11.64	13.435	13.48	12.19	9.08	11.6	11.5875	13.03	8.45	11.64	13.88	11.75	8.72	10.15	11.98	13.38	11.0575	9.94	11.44	11.23	9.89	10.625
CSS0000802.1	CSS0000802	3.14	2.47	3.06	2.8	2.8675	2.43	3.27	1.88	2.23	2.4525	2.76	2.47	3.53	3.2	2.99	1.67	2.13	2.1	3.4	2.325	2.51	2.28	3.67	2.89	2.8375
CSS0000803.1	CSS0000803	2.81	3.07	4.72	2.5	3.275	8.88	3.73	10.66	12.34	8.9025	11.91	17.5	17.93	15.24	15.645	5.55	10.13	15.14	6.26	9.27	6.73	0.3	3.75	3.21	3.4975
CSS0000804.1	CSS0000804	10.73	13.35	13.21	13.09	12.595	5.64	6.44	8.39	4.97	6.36	8.02	7.32	9.6	7.76	8.175	6.52	9.42	7.7	12.66	9.075	15.56	12.7	14.65	10.54	13.3625
CSS0000805.1	CSS0000805	0.91	1.18	0.88	0.86	0.9575	0.68	0.82	0.51	0.51	0.63	0.41	0	0	0.74	0.2875	0.74	1.19	1.34	0.32	0.8975	1.24	0.89	0.44	1.27	0.96
CSS0000806.1	CSS0000806	9.18	8.4	13.33	7.52	9.6075	12.02	6.1	10.26	5.84	8.555	5.52	5.38	4.5	2.41	4.4525	9.48	8.65	5.58	6.94	7.6625	6.73	7.92	7.84	7.13	7.405
CSS0000807.1	CSS0000807	0	0	0	0.1	0.025	0	0	0	0	0	0	0	0	0	0	0	0	0	0	0	0	0	0	0	0
CSS0000808.1	CSS0000808	0	0	0	0	0	0	0	0	0	0	0	0	0	0	0	0	0	0	0	0	0	0	0	0	0
CSS0000809.1	CSS0000809	2.63	2.67	2.88	2.8	2.745	1.62	2.7	2.26	2.86	2.36	2.24	2.55	2.32	2.74	2.4625	3.37	2.39	2.58	3.47	2.9525	2.31	2.61	3.18	3.55	2.9125
CSS0000810.1	CSS0000810	25.91	25.93	23.18	22.28	24.325	16.35	18.44	19.74	14.74	17.3175	20.78	17.78	20.4	21.29	20.0625	18.43	18.5	18.48	19.96	18.8425	28.36	29.07	21.86	26.01	26.325
CSS0000811.1	CSS0000811	0	0	0	0	0	0	0	0	0	0	0	0	0	0	0	0	0	0	0	0	0	0	0	0	0
CSS0000812.1	CSS0000812	0.21	0	0.43	0.17	0.2025	0.76	0.15	0.16	0.12	0.2975	0.63	0.2	0.21	0.51	0.3875	0.38	0.24	0.28	0.45	0.3375	0.45	0.34	0.64	0.27	0.425
CSS0000813.1	CSS0000813	113.13	129.2	162.66	121.74	131.683	127.19	103.28	160.54	114.69	126.425	133.82	144.24	144.01	137.7	139.942	112.26	130.83	125.26	267.34	158.923	152.68	113.54	136.14	178.25	145.153
CSS0000814.1	CSS0000814	85.84	96.53	99.53	80.53	90.6075	78.32	89.86	88.15	80.4	84.1825	87.31	85.04	74.92	93.12	85.0975	101.15	85.21	94.21	109.84	97.6025	80.87	73.43	94.3	103.03	87.9075
CSS0000815.1	CSS0000815	0	0	0	0	0	0	0	0	0	0	0	0	0	0	0	0	0	0	0	0	0	0	0	0	0
CSS0000816.1	CSS0000816	0	0	0	0	0	0	0	0	0	0	0	0	0	0	0	0	0	0	0	0	0	0	0	0	0
CSS0000817.1	CSS0000817	0	0	0	0	0	0	0	0	0	0	0	0	0	0	0	0	0	0	0	0	0	0	0	0	0
CSS0000818.1	CSS0000818	0	0	0	0	0	0	0	0	0	0	0	0	0	0	0	0	0	0	0	0	0	0	0	0	0
CSS0000819.1	CSS0000819	63.18	53.63	51.92	63.25	57.995	40.1	53.27	42.36	45.64	45.3425	45.68	48.97	43.94	54.28	48.2175	44.09	49.97	51.13	44.21	47.35	41.92	47.97	54.03	51.08	48.75
CSS0000820.1	CSS0000820	0	0	0	0	0	0	0	0	0	0	0	0	0	0	0	0	0	0	0	0	0	0	0	0	0
CSS0000821.1	CSS0000821	0	0	0	0	0	0	0	0	0	0	0	0	0	0	0	0	0	0	0	0	0	0	0	0	0
CSS0000822.1	CSS0000822	0.68	1.32	1.47	0.67	1.035	0.71	1.63	0.67	0.88	0.9725	0.58	1.31	1.52	1.65	1.265	1.14	0.97	0.77	1.88	1.19	1.31	1.6	1.66	1.54	1.5275
CSS0000823.1	CSS0000823	0	0	0	0	0	0	0	0	0.1	0.025	0.13	0	0	0	0.0325	0	0	0	0	0	0	0	0	0	0
CSS0000824.1	CSS0000824	0.06	0.06	0.12	0	0.06	0.06	0	0	0.14	0.05	0.12	0.12	0.17	0.19	0.15	0	0.06	0	0.18	0.06	0	0.3	0.18	0	0.12
CSS0000825.1	CSS0000825	47.11	25.81	28.16	22.19	30.8175	6.97	48.09	18.4	7.63	20.2725	21.8	0	33.13	18.87	18.45	14.78	0	0	17.68	8.115	15.35	22.1	34.05	7.89	19.8475
CSS0000826.1	CSS0000826	4.84	5.61	6.32	2.8	4.8925	6.59	3.02	5.48	2.91	4.5	3.28	2.46	2.68	4.41	3.2075	8.23	5.33	7.12	2.1	5.695	4.43	6.57	2.6	5.87	4.8675
CSS0000827.1	CSS0000827	8.02	10.23	9.89	7.25	8.8475	7.68	9.7	6.75	6.72	7.7125	9.49	9.5	7.74	12.39	9.78	9.52	9.16	8.41	10.28	9.3425	12.61	13.03	9.99	9.36	11.2475
CSS0000828.1	CSS0000828	3.77	2.71	5.22	3.89	3.8975	4.04	4.78	7.02	3.93	4.9425	6.19	6.28	6.48	7.51	6.615	3.21	3.25	5.82	12.9	6.295	9.83	6.18	9.15	6.66	7.955
CSS0000829.1	CSS0000829	0	0	0	0	0	0	0	0	0	0	0	0	0	0	0	0	0	0	0	0	0	0	0	0	0
CSS0000830.1	CSS0000830	0	0	0	0	0	0	0	0	0	0	0	0	0	0	0	0	0	0	0	0	0	0	0	0	0
CSS0000831.1	CSS0000831	16.94	10.82	12.92	10.74	12.855	5.34	6.95	16.72	6.29	8.825	15.28	7.43	8.27	9.66	10.16	7.42	6.34	8.06	19.24	10.265	14.36	11.29	11.53	12.52	12.425
CSS0000832.1	CSS0000832	13.79	12.71	9.6	14.04	12.535	7.54	8.2	7.45	8.95	8.035	11.42	9.07	8.48	9.97	9.735	9.41	7.83	6.71	10.49	8.61	13.82	10.94	8.97	13.58	11.8275
CSS0000833.1	CSS0000833	0	0	0.38	0	0.095	0	0	0	0	0	0	0	0	0	0	0	0	0	0	0	0	0	0	0	0
CSS0000834.1	CSS0000834	343.01	393.16	347.05	351.54	358.69	220.07	238.05	241.1	192.35	222.893	256.56	276.54	205.7	235.76	243.64	244.05	341.06	259.64	174.16	254.727	331.41	394.01	268.52	277.29	317.808
CSS0000835.1	CSS0000835	3.19	2.84	2.38	3.03	2.86	0.89	3.01	2.17	2.7	2.1925	2.77	3.08	2.74	3.6	3.0475	2.13	2.3	1.94	2.1	2.1175	2.05	2.9	2.34	0.93	2.055
CSS0000836.1	CSS0000836	0	0	0	0	0	0	0	0.04	0	0.01	0	0	0	0	0	0	0	0	0	0	0	0	0	0	0
CSS0000837.1	CSS0000837	95.08	85.72	88.54	104.08	93.355	79.64	96.91	78.35	93.5	87.1	85.22	81.89	88.54	99.52	88.7925	64.91	66.15	65.95	80.62	69.4075	42.06	48.5	75.93	76.29	60.695
CSS0000838.1	CSS0000838	0	0	0	0	0	0	0	0	0	0	0	0	0	0	0	0	0	0	0	0	0	0	0	0	0
CSS0000839.1	CSS0000839	15.37	11.16	46.34	14.6	21.8675	18.23	9.05	20.24	30.39	19.4775	33.28	9.6	0	18.36	15.31	4.85	4.94	4.69	5.72	5.05	10.03	4.84	11.03	10.3	9.05
CSS0000840.1	CSS0000840	0	0	0	0	0	0	0	0	0	0	0	0	0	0	0	0	0	0	0	0	0	0	0	0	0
CSS0000841.1	CSS0000841	0	0	0	0	0	0	0	0	0	0	0	0	0	0	0	0	0	0	0	0	0	0	0	0	0
CSS0000842.2	CSS0000842	34.26	47.47	40.23	37.22	39.795	29.84	38.51	35.99	33.62	34.49	37.68	32.72	32.78	38.11	35.3225	39.4	38.92	36.69	37.54	38.1375	45.3	43.82	34.17	39.62	40.7275
CSS0000843.1	CSS0000843	0.13	0.26	0.49	0.37	0.3125	0	0	0	0	0	0.37	0	0	0	0.0925	0	0.25	0.13	0.26	0.16	0.61	0.13	0.13	0.74	0.4025
CSS0000844.1	CSS0000844	0	2.3	1.17	0.67	1.035	6.5	1.42	3.43	12.71	6.015	2.16	1.79	0	1.69	1.41	11.89	7.12	6.34	0.8	6.5375	0.8	0	0	0.75	0.3875
CSS0000845.1	CSS0000845	25.65	27.76	22.77	18.41	23.6475	25.06	26.11	16.38	26.11	23.415	25.74	19.92	20.03	29.33	23.755	27.54	20.12	23.6	14.85	21.5275	8.67	10.68	15.18	9.9	11.1075
CSS0000846.1	CSS0000846	0.33	0.17	0.08	0.32	0.225	0	0.16	0	0	0.04	0	0.08	0	0	0.02	0	0	0.08	0	0.02	0	0	0.16	0	0.04
CSS0000847.1	CSS0000847	38.49	33.96	25.95	34.34	33.185	46.2	51.73	48.31	85.42	57.915	34.64	50.89	63.99	50.99	50.1275	78.65	84.81	86.49	44.52	73.6175	45.76	44.28	48.25	38.79	44.27
CSS0000848.1	CSS0000848	13.4	13.96	12.97	12.47	13.2	14.01	14.84	10.77	10.36	12.495	14.74	13.09	12.8	15.83	14.115	14.02	13.87	11.65	15.93	13.8675	14.3	14.93	12.67	11.3	13.3
CSS0000849.1	CSS0000849	2.21	1.14	3.72	1.36	2.1075	0.51	0	0.97	0.31	0.4475	1.06	0.26	0.52	1.22	0.765	1.1	0.54	0	0.87	0.6275	0.54	0.55	1.68	1.08	0.9625
CSS0000850.1	CSS0000850	0	0	0	0	0	0	0	0	0	0	0	0	0	0	0	0	0	0	0	0	0	0	0	0	0
CSS0000851.1	CSS0000851	0	0	0	0	0	0	0	0	0	0	0	0	0	0	0	0	0	0	0	0	0	0	0	0	0
CSS0000852.1	CSS0000852	0	0	0	0	0	0	0	0	0	0	0	0	0	0	0	0	0	0	0	0	0	0	0	0	0
CSS0000853.1	CSS0000853	0	0	0	0	0	0	0	0	0	0	0	0	0	0	0	0	0	0	0	0	0	0	0	0	0
CSS0000854.1	CSS0000854	0	0	0.13	0.03	0.04	0	0.03	0	0	0.0075	0.06	0	0.03	0.14	0.0575	0	0	0	0	0	0	0.17	0.03	0	0.05
CSS0000855.1	CSS0000855	4.66	1.23	1.09	6.8	3.445	2.11	4.32	3.89	0	2.58	3.29	7.71	6.26	4.01	5.3175	4.53	0	1.12	1.26	1.7275	3.41	3.41	3.65	6.99	4.365
CSS0000856.1	CSS0000856	62.19	73.85	80.47	62.01	69.63	101.17	89.64	86.46	88.67	91.485	88.77	77.7	79.38	94.73	85.145	122.29	91.25	88.36	98	99.975	77.52	62.72	75.14	78.66	73.51
CSS0000857.1	CSS0000857	1.86	1.82	0.87	1.38	1.4825	1.65	1.03	0.96	1.43	1.2675	1.35	1.66	0.91	1.41	1.3325	1.37	1.12	1.47	1.28	1.31	1.69	1.73	1.23	1.6	1.5625
CSS0000858.1	CSS0000858	0	0	0.06	0	0.015	0.04	0.16	0	0	0.05	0	0	0	0.13	0.0325	0	0	0.3	0.11	0.1025	0	0	0	0	0
CSS0000859.1	CSS0000859	0	0	0	0	0	0	0	0	0	0	0	0	0	0	0	0	0	0	0	0	0	0	0	0	0
CSS0000860.1	CSS0000860	9.73	9.67	11.04	11.32	10.44	12.12	9.95	7.58	9.34	9.7475	9.76	10.62	8.57	8.15	9.275	14	9.47	9.55	10.55	10.8925	10.47	12.7	9.21	7.88	10.065
CSS0000861.1	CSS0000861	116.35	119.07	94.52	108.34	109.57	107.64	113.92	101.09	94.95	104.4	98.47	103.65	94.55	86.14	95.7025	102.28	91.13	101.65	76.66	92.93	88.41	92.02	88.76	90.4	89.8975
CSS0000862.1	CSS0000862	0	0	1.97	0	0.4925	0	0	0	0.28	0.07	0	0.97	0	0	0.2425	0	0	0.98	0.26	0.31	0	0	2.16	0	0.54
CSS0000863.1	CSS0000863	0	0	0.35	0	0.0875	0	0	0.32	0.41	0.1825	0.7	0	0	0	0.175	1.09	0	0	0	0.2725	0	0.73	0	0	0.1825
CSS0000864.1	CSS0000864	13.08	12.09	13.74	10.5	12.3525	11.06	17.03	11.1	10	12.2975	11.08	15.32	13.1	17.54	14.26	10.55	8.02	8.9	14.3	10.4425	10.97	11.43	16.35	9.99	12.185
CSS0000865.1	CSS0000865	0	0	0	0.24	0.06	0.58	1.09	0.55	0.14	0.59	0.36	0.36	0.35	0.54	0.4025	0.25	0.12	0.5	0.26	0.2825	0.48	0.62	0	0.36	0.365
CSS0000866.1	CSS0000866	0	0	0	0	0	0	0	0	0	0	0	0	0	0	0	0	0	0	0	0	0	0	0	0	0
CSS0000867.1	CSS0000867	0.41	0.25	0.2	0.54	0.35	0.35	0.3	0.12	0.16	0.2325	0.17	0.3	0.2	0.41	0.27	0.07	0.27	0.42	0.21	0.2425	0.4	0.42	0.45	0.13	0.35
CSS0000868.1	CSS0000868	5.85	6.82	9.87	5.03	6.8925	2.69	2.38	5.66	1.79	3.13	4.9	2.93	3.53	2.11	3.3675	2.64	4.06	2.98	7.85	4.3825	10.06	8.48	5.4	7.57	7.8775
CSS0000869.1	CSS0000869	0.1	0	0.09	0	0.0475	0	0.19	0	0	0.0475	0	0	0.37	0	0.0925	0	0	0	0.1	0.025	0.19	0.1	0	0.09	0.095
CSS0000870.1	CSS0000870	0	0	0	0	0	0	0	0	0	0	0	0	0	72.17	18.0425	0	0	0	0	0	0	0	0	0	0
CSS0000871.1	CSS0000871	0	0	0	0	0	0	0	0	0	0	0	0	0	0	0	0	0	0	0	0	0	0	0	0	0
CSS0000872.1	CSS0000872	12.75	15.42	13.6	13.5	13.8175	8.8	18.91	13.66	11.01	13.095	14.12	14.24	14.57	17.42	15.0875	12.51	12.77	12.33	18.95	14.14	13.36	14.1	20.51	20.08	17.0125
CSS0000873.1	CSS0000873	0	0.81	0	1.48	0.5725	0.69	0	0	0	0.1725	0	0	0	0	0	0	0	0	0	0	0	0	0.78	0	0.195
CSS0000874.1	CSS0000874	21.18	19.91	19.48	20.04	20.1525	17.85	17.3	14.01	13.64	15.7	20.95	18.72	16.49	20.7	19.215	19.93	17.14	15.4	13.96	16.6075	27.45	24.4	18.91	20.6	22.84
CSS0000875.1	CSS0000875	0	0	0	0	0	0	0.47	0	0.28	0.1875	0	0	0	0.53	0.1325	0	0	0.73	0	0.1825	0.23	0.24	0	0	0.1175
CSS0000876.1	CSS0000876	10.55	11.03	9.5	9.51	10.1475	7.4	9.51	8.77	7.51	8.2975	9.73	9.26	6.13	9.95	8.7675	8.33	10.94	9.56	9.95	9.695	10.55	11.61	12.14	14.42	12.18
CSS0000877.1	CSS0000877	0	0	0	0	0	0	0	0	0	0	0	0	0	0	0	0	0	0	0	0	0	0	0	0	0
CSS0000878.1	CSS0000878	0	0.44	0.21	0.21	0.215	0.2	0	0	0	0.05	0	0.21	0	0	0.0525	0	0	0	0.67	0.1675	0	0	0.22	0	0.055
CSS0000879.1	CSS0000879	159.91	182.82	239.57	166.2	187.125	196.83	139.28	252.55	157.03	186.423	206	197.75	212.81	205.36	205.48	161.93	190.9	191.48	424.37	242.17	265.68	175.89	228.68	277.53	236.945
CSS0000880.1	CSS0000880	14.97	19.05	16.56	14.87	16.3625	5.33	6.95	10.52	6.04	7.21	9.27	6.35	8.33	6.64	7.6475	6.87	10.01	6.76	11.76	8.85	13.14	12.23	9.7	15.61	12.67
CSS0000881.1	CSS0000881	11.52	8.98	6.94	10.26	9.425	4.84	4.42	3.63	1.98	3.7175	4.18	5.65	4.93	6.22	5.245	4.34	4.7	2.84	2.73	3.6525	8	5.89	8.77	5.73	7.0975
CSS0000882.1	CSS0000882	4.12	3.69	4.02	4.31	4.035	8.19	12.48	12.84	13.67	11.795	7.28	8.53	12.75	12.46	10.255	12.43	11.18	12.7	10.95	11.815	4.6	3.6	5.39	4.67	4.565
CSS0000883.1	CSS0000883	0	0	0	0	0	0	0	0	0	0	0	0	0	0	0	0	0.64	0	0	0.16	0	0	0	3.49	0.8725
CSS0000884.1	CSS0000884	31.97	35.82	30.91	32.63	32.8325	23.9	27.86	24.76	22.81	24.8325	29.66	32.76	29.36	37.31	32.2725	17.11	22.27	25.24	32.24	24.215	21.27	17.41	25.69	23.37	21.935
CSS0000885.1	CSS0000885	0.42	0.33	0.82	0.1	0.4175	184.03	89.12	46.1	164.83	121.02	11.92	19.75	8.96	7.49	12.03	417.29	135.3	70.36	6.02	157.243	1.43	0.64	4.33	0.82	1.805
CSS0000886.1	CSS0000886	5.65	8.14	6.1	7.78	6.9175	7.02	3.67	5.23	5.36	5.32	8.37	7.15	6.71	7.15	7.345	5.53	3.96	6.1	7.31	5.725	6.68	6.33	6.3	7.2	6.6275
CSS0000887.1	CSS0000887	4.7	6.73	6.36	6.09	5.97	6.43	6.61	5.66	4.25	5.7375	3.46	5.25	4.09	3.93	4.1825	2.29	4.33	3.87	4.39	3.72	7.54	5.12	4.66	6.62	5.985
CSS0000888.1	CSS0000888	0.31	0.76	0.47	0.69	0.5575	0.53	0.3	0.16	0.2	0.2975	0.38	0.38	0.29	0.52	0.3925	0.48	0.47	0.4	0.72	0.5175	0.38	0.4	0.61	0.63	0.505
CSS0000889.1	CSS0000889	0.47	0.96	0.45	0.46	0.585	0.86	0.23	1.02	0.27	0.595	0.45	1.35	1.1	0.77	0.9175	0.7	0.23	1.17	0.49	0.6475	0.45	0.47	0.24	1.14	0.575
CSS0000890.1	CSS0000890	0	0	0	0	0	0	0	0	0	0	0	0	0	0	0	0	0	0	0	0	0	0	0	0	0
CSS0000891.1	CSS0000891	0.07	0.2	0.25	0.09	0.1525	0.13	0.21	0.05	0.64	0.2575	0	0.25	0.2	0.31	0.19	0.13	0.25	0.18	0.06	0.155	0	0.2	0.19	0	0.0975
CSS0000892.1	CSS0000892	0	0	0	0	0	0	0	0	0	0	0	0	0	0	0	0.23	0	0	0	0.0575	0	0	0	0	0
CSS0000893.1	CSS0000893	35.14	36.09	36.58	30.77	34.645	27.88	29.3	31.45	24.39	28.255	33.03	25.59	25.62	28.5	28.185	28.86	30.5	29.73	35.26	31.0875	41.41	43.33	35.75	34.69	38.795
CSS0000894.1	CSS0000894	0	0.15	0	0	0.0375	0	0	0	0	0	0	0	0	0	0	0	0	0	0	0	0	0	0	0	0
CSS0000895.1	CSS0000895	318.92	309.39	329.34	284.7	310.587	336.14	315.13	397.42	284.33	333.255	424.93	307.31	381.54	299.41	353.298	384.33	379.76	359.97	393.54	379.4	401.98	394.94	308.22	379.42	371.14
CSS0000896.1	CSS0000896	13.9	16.02	16.66	20.35	16.7325	16.85	22.01	21.31	13.97	18.535	18.39	13.34	19.41	17.46	17.15	19.05	24.61	16.95	19.2	19.9525	29.1	21.96	17.24	25.51	23.4525
CSS0000897.1	CSS0000897	0	0	0	0	0	0	0	0	0	0	0	0	0	0	0	0	0	0	0	0	0	0	0	0	0
CSS0000898.1	CSS0000898	0	0	0	0	0	0	0	0	0	0	0	0	0	0	0	0	0	0	0	0	0	0	0	0	0
CSS0000899.1	CSS0000899	0.83	1.04	0.75	1.63	1.0625	0.17	0.5	0.22	1.63	0.63	0.4	0.87	0.59	1.16	0.755	0.4	0.38	0.13	0.55	0.365	0.62	0.29	0.37	0.47	0.4375
CSS0000900.1	CSS0000900	0	0	0	0	0	0	0	0	0	0	0	0	0	0	0	0	0	0	0	0	0	0	0	0	0
CSS0000901.1	CSS0000901	26.53	28.16	25.46	42.78	30.7325	21.84	26.01	17.07	29.11	23.5075	19.4	35.39	38.51	40.1	33.35	24.16	24.76	36.15	15.1	25.0425	15.38	13.45	32.61	22.63	21.0175
CSS0000902.1	CSS0000902	70.17	63.95	62.93	68.98	66.5075	71.32	86.57	65.59	57.31	70.1975	76.38	75.76	62.81	72.75	71.925	80.85	75.83	70.63	66.75	73.515	64.53	75.42	64.14	66.4	67.6225
CSS0000903.1	CSS0000903	6.76	8	7.87	8.33	7.74	5.08	4.24	5.97	4.69	4.995	5.56	6.46	4.93	6.22	5.7925	4.39	4.86	5.87	8.38	5.875	8.47	7.9	8.48	6.55	7.85
CSS0000904.1	CSS0000904	0	0	0	0	0	0	1.74	3.13	0	1.2175	0	0	0	4.47	1.1175	0	0	0	0	0	3.75	0	0	0	0.9375
CSS0000905.1	CSS0000905	0	0	0	0	0	0	0	0	0	0	0	0	0	0	0	0	0	0	0	0	0	0	0	0	0
CSS0000906.1	CSS0000906	0	0	0	0	0	0	0	0	0	0	0	0	0	0	0	0	0	0	0	0	0	0	0	0	0
CSS0000907.1	CSS0000907	0	0	0	0	0	0.07	0	0	0	0.0175	0	0	0	0	0	0	0	0	0	0	0	0	0	0	0
CSS0000908.1	CSS0000908	4.96	5.12	5.21	5.3	5.1475	21.39	18.58	16.29	20.92	19.295	17.22	25.92	21.19	18.74	20.7675	32.47	18.03	19.69	13.08	20.8175	9.61	8.88	8.7	10.53	9.43
CSS0000909.1	CSS0000909	0	0	0	0	0	0	0	0	0	0	0	0	0	0	0	0	0	0	0	0	0	0	0	0	0
CSS0000910.1	CSS0000910	14.29	12.16	13.11	11.92	12.87	16.04	11.03	11.94	14.11	13.28	12.89	11.08	14.18	9.37	11.88	10.41	9.48	8.93	15.7	11.13	14.88	10.17	12.18	14.81	13.01
CSS0000911.1	CSS0000911	1.28	1.86	1.03	1.57	1.435	1.59	1.66	1.51	1.23	1.4975	1.03	0.92	0.91	1.51	1.0925	1.6	0.84	2.05	1.88	1.5925	1.03	1.18	1.81	0.72	1.185
CSS0000912.1	CSS0000912	0	0	0	0	0	0	0	0	0	0	0	0	0	0	0	0	0	0	0	0	0	0	0	0	0
CSS0000913.1	CSS0000913	10.58	12.18	11.59	10.33	11.17	7.96	7.59	8.51	6.67	7.6825	11.09	7.37	8.35	9.13	8.985	8.55	8.4	9.02	9.03	8.75	8.8	10.79	8.94	9.35	9.47
CSS0000914.1	CSS0000914	0.63	0.4	0.71	1.06	0.7	1.58	0.7	0.48	0.63	0.8475	0.4	1.11	1.12	1.56	1.0475	0.92	0.75	1.11	0.67	0.8625	0.46	0.8	0.38	1.28	0.73
CSS0000915.1	CSS0000915	2.64	5.51	3.02	2.59	3.44	2.42	3.51	1.36	0	1.8225	6.04	3.52	3.89	0.59	3.51	4.17	2.59	3.11	2.81	3.17	2.06	3.15	3.25	1.57	2.5075
CSS0000916.1	CSS0000916	22.44	18.08	21.93	15.72	19.5425	17.84	16.65	23.34	21.83	19.915	18.98	25.56	25.14	20.96	22.66	26.26	25.23	27.02	21.06	24.8925	25.72	24.36	16.16	15.28	20.38
CSS0000917.1	CSS0000917	0	0	0.36	0	0.09	0	0	0	0	0	0	0	0	0	0	0	0	0	0	0	0	0	0	0	0
CSS0000918.1	CSS0000918	31.17	34.94	32.51	32.08	32.675	30.78	52.93	34.34	34.8	38.2125	39.38	39.79	28.12	48.18	38.8675	34.32	54.2	44.2	35.37	42.0225	30.39	30.39	31.09	26.32	29.5475
CSS0000919.1	CSS0000919	202.83	145.28	142.7	182.71	168.38	123.74	229.02	208.75	262.47	205.995	121.94	162.29	191.46	163.3	159.748	135.83	256.38	264	171.31	206.88	210.3	193.4	208.8	154.9	191.85
CSS0000920.1	CSS0000920	23.23	18.03	18.11	22.89	20.565	15.9	16.53	22.41	24.04	19.72	19	14.88	12.7	17.23	15.9525	15.44	14.42	11.44	17.74	14.76	24	18.62	18.39	18.79	19.95
CSS0000921.1	CSS0000921	0.43	0	0.39	0.33	0.2875	0.26	0.35	0	0.18	0.1975	0.38	0.33	0.35	0.59	0.4125	0	0.24	0.34	0.19	0.1925	0	0.28	0.28	0.38	0.235
CSS0000922.1	CSS0000922	21.55	17.4	17.99	17.47	18.6025	7.82	7.83	10.74	5.01	7.85	13.46	10.25	7.27	12.31	10.8225	6.95	11.1	6.86	8.09	8.25	13.17	17.73	14.26	15.37	15.1325
CSS0000923.1	CSS0000923	1.37	4.32	0	4.03	2.43	2.51	3.23	1.17	1.5	2.1025	3.26	2.61	0.63	2.33	2.2075	1.35	2.02	0.67	2.21	1.5625	1.34	1.36	2.83	0.68	1.5525
CSS0000924.1	CSS0000924	25.63	23.16	24.46	18.76	23.0025	28.77	27.12	27.97	30.42	28.57	18.17	25.74	26.02	25.62	23.8875	23.6	22.28	25.4	24.82	24.025	13.99	16.6	22.47	22.37	18.8575
CSS0000925.1	CSS0000925	56.32	79.72	52.04	56.36	61.11	77.68	54.83	52.87	22.89	52.0675	50.81	77.61	51.14	51.68	57.81	50.31	60.51	35.84	52.96	49.905	27.54	27.12	12.74	40.37	26.9425
CSS0000926.1	CSS0000926	0	0	1.21	0.63	0.46	0	0	0	0	0	0	0	0	0.72	0.18	0	0.63	0	0	0.1575	0	0	0.66	0.64	0.325
CSS0000927.1	CSS0000927	0	0	0	0	0	0	0	0	0	0	0	0	0	0	0	0	0	0	0	0	0	0	0	0	0
CSS0000928.1	CSS0000928	0	0	0	0	0	0	0	0	0.01	0.0025	0	0.06	0	0.13	0.0475	0	0	0	0	0	0	0	0.05	0	0.0125
CSS0000929.1	CSS0000929	0	0.25	0.12	0.12	0.1225	0.11	0	0.32	0.28	0.1775	0.35	0.12	0.69	0	0.29	0	0.12	0	0	0.03	0.12	0.12	0.24	0.12	0.15
CSS0000930.1	CSS0000930	0	0	0	0	0	0	2.23	0	0	0.5575	1.14	0	0	0	0.285	0	0	0	0	0	0	0	0	0	0
CSS0000931.1	CSS0000931	36.04	24.16	21.16	36.29	29.4125	23.91	35.65	16.12	38.21	28.4725	15.77	23.97	24.74	23.98	22.115	25.87	24.76	35.14	18.32	26.0225	15.72	17.59	18.34	18.71	17.59
CSS0000932.1	CSS0000932	0	0	0	0	0	0	0	0	0.14	0.035	0	0	0	0	0	0	0	0	0	0	0	0	0	0	0
CSS0000933.1	CSS0000933	0	0	0	0	0	0	0	0	0	0	0	0	0	0	0	0	0	0	0	0	0	0	0	0	0
CSS0000934.1	CSS0000934	3.86	3.71	3.04	5.21	3.955	3.28	3.07	5.46	4.37	4.045	2.48	2.75	2.91	3.47	2.9025	2.87	3.67	4.42	2.51	3.3675	6.63	2.85	4.41	4.82	4.6775
CSS0000935.1	CSS0000935	18.74	17.46	20.55	16.8	18.3875	14.04	11.21	16.99	7.67	12.4775	29.28	19.33	17.97	21.54	22.03	13.44	14.67	15.2	39.75	20.765	34.13	27.49	23.53	29.63	28.695
CSS0000936.1	CSS0000936	8.68	9.01	7.78	6.55	8.005	6.47	4.98	6.16	4.44	5.5125	8.12	6.17	6.51	7.73	7.1325	6.52	4.8	4.55	6.89	5.69	7.2	10.68	8.05	8.06	8.4975
CSS0000937.1	CSS0000937	0	0	0	0.32	0.08	0	0	0	0	0	0	0	0	0.74	0.185	0	0.95	0	0	0.2375	0	0	0	0	0
CSS0000938.1	CSS0000938	34.51	32.63	30.75	35.96	33.4625	33.17	41.43	33.55	31.36	34.8775	32.12	30.43	29.18	35.38	31.7775	39.18	34.31	38.31	34.84	36.66	37.61	33.3	30.09	32.33	33.3325
CSS0000939.1	CSS0000939	4.32	2.37	9.85	4.37	5.2275	3.22	0.77	5.62	3.53	3.285	4.32	2.31	3.17	1.74	2.885	2.13	0.89	1.27	3.14	1.8575	4.63	5.68	3.64	10.35	6.075
CSS0000940.1	CSS0000940	0	0.21	0.59	0	0.2	0.97	0.22	1.18	1.27	0.91	0	0.21	0.23	0	0.11	0.64	0	0.51	0.43	0.395	0	0.19	0	0.55	0.185
CSS0000941.1	CSS0000941	3.67	3.46	2.53	3.08	3.185	3.14	2.24	2.79	2.75	2.73	2.67	2.37	3.08	2.5	2.655	2.53	2.94	2.72	2.3	2.6225	3.1	6.1	3.29	3.7	4.0475
CSS0000942.1	CSS0000942	0	0	0	0	0	0	0	0	0	0	0	0	0	0	0	0	0	0	0	0	0	0	0	0	0
CSS0000943.1	CSS0000943	0.12	0.08	0.15	0.08	0.1075	0.06	0.02	0.04	0	0.03	0.03	0.05	0	0.02	0.025	0	0.02	0.03	0.08	0.0325	0.05	0.03	0.06	0.05	0.0475
CSS0000944.1	CSS0000944	31.7	46.46	0	0	19.54	9.37	0	0	0	2.3425	0	9.9	0	12.73	5.6575	0	30.35	0	0	7.5875	0	0	0	10.62	2.655
CSS0000945.1	CSS0000945	0	0	0	0	0	0	0	0	0	0	0	0	0	0	0	0	0	0	0	0	0	0	0	0	0
CSS0000946.1	CSS0000946	5.45	4.78	4.15	4.78	4.79	3.17	7.1	3.85	5.49	4.9025	4.96	4.31	6.7	6.45	5.605	4.34	3.54	5.47	5.85	4.8	3.02	5.17	4.66	3.99	4.21
CSS0000947.1	CSS0000947	0	0	0	0	0	0	0	0	3.59	0.8975	0	0	0	0	0	0	0	0	0	0	0	0	0	0	0
CSS0000948.1	CSS0000948	0	0	0	0	0	0	0	0	0	0	0	0	0	0	0	0	0	0	0	0	0	0	0	0	0
CSS0000949.1	CSS0000949	0	0	0.13	0	0.0325	0	0	0.12	0	0.03	0	0	0	0	0	0	0	0	0	0	0	0	0	0	0
CSS0000950.1	CSS0000950	0.23	0.96	0.23	0	0.355	0	0	0	0	0	0.22	0	0	1.03	0.3125	0	0.23	0	0	0.0575	0.23	0.47	0.47	0	0.2925
CSS0000951.1	CSS0000951	0	0	0	0	0	0	0.39	0	0	0.0975	0	0	0	0	0	0	0	0	0.43	0.1075	0	0	0	0	0
CSS0000952.1	CSS0000952	2.02	1.67	2.84	2.12	2.1625	1.38	1.77	2.06	1.62	1.7075	2.07	3.3	1.95	1.74	2.265	1.86	1.77	2.71	3.49	2.4575	3.1	2.23	2.03	2.9	2.565
CSS0000953.1	CSS0000953	3.58	3.82	5.12	4.65	4.2925	1.66	0.73	6.07	1.91	2.5925	3.49	2.76	4.01	3.56	3.455	1.4	2.85	3.14	7.77	3.79	9.01	4.72	4.74	9.94	7.1025
CSS0000954.1	CSS0000954	14.25	12.77	14.12	12.97	13.5275	15.77	11.75	11.56	9.61	12.1725	15.47	12.98	11.11	18.18	14.435	12.21	12.08	10.68	19.76	13.6825	18.5	17.49	16.1	16.69	17.195
CSS0000955.1	CSS0000955	2.65	4.55	2.28	4.22	3.425	2.54	3.78	3.69	4.65	3.665	2.49	3.88	2.19	2.73	2.8225	2.22	2.61	1.82	1.63	2.07	2.97	2.39	3.29	2.49	2.785
CSS0000956.1	CSS0000956	2.67	2.83	2.66	2.5	2.665	1.9	2.09	2.23	1.74	1.99	3.17	2.02	1.83	2.55	2.3925	3.16	2.8	2.23	2.99	2.795	3.78	3.14	2.51	2.75	3.045
CSS0000957.1	CSS0000957	6.59	6.2	4.7	7.12	6.1525	4.85	5.53	4.78	5.05	5.0525	9.87	8.07	7.81	11.25	9.25	4.65	4.94	4.7	5.97	5.065	13.81	10.4	13.57	10.16	11.985
CSS0000958.1	CSS0000958	7.16	9.58	6.03	9.09	7.965	6.07	6.03	5.73	5.74	5.8925	5.44	7.15	4.2	2.64	4.8575	5.34	6.45	3.87	4.39	5.0125	5.21	5.97	6.35	8.79	6.58
CSS0000959.1	CSS0000959	0	0	0	0	0	0	0	0	0	0	0	0	0	0	0	0	0	0	0	0	0	0	0	0	0
CSS0000960.1	CSS0000960	42.68	41.84	42.65	38.37	41.385	66.26	51.53	43.45	57.89	54.7825	40.36	44.55	36.02	41.55	40.62	76.52	60.74	58.85	45.77	60.47	51.43	55.63	45.61	49.09	50.44
CSS0000961.1	CSS0000961	7.25	5.12	2.26	5.33	4.99	5.47	2.23	3.02	3.85	3.6425	3.41	1.7	3.24	2.78	2.7825	3.55	3.53	1.15	5.25	3.37	2.53	2.35	3.78	1.21	2.4675
CSS0000962.1	CSS0000962	17.31	17.11	12.65	13.94	15.2525	9.59	8.11	7.9	10.82	9.105	7.6	7.8	5.2	9.2	7.45	11.18	7.95	10.58	3.73	8.36	8.58	10.3	10.42	11.86	10.29
CSS0000963.1	CSS0000963	0	0	0	0.05	0.0125	0	0	0	0	0	0	0	0	0	0	0	0	0	0	0	0	0	0	0	0
CSS0000964.1	CSS0000964	1.38	0.86	2.66	2.98	1.97	1.79	1.33	1.45	0.31	1.22	1.33	1.06	1.3	0.91	1.15	0.55	2.71	1.1	1.45	1.4525	2.41	1.38	1.95	2.16	1.975
CSS0000965.1	CSS0000965	2.19	2.75	2.74	2.36	2.51	1.43	1.94	1.91	1.44	1.68	2.2	2.12	1.95	2.25	2.13	1.87	2.48	2.31	2.43	2.2725	3.67	2.96	3.09	2.63	3.0875
CSS0000966.2	CSS0000966	16.24	17.27	15.59	16.14	16.31	11.25	19.65	12.61	13.77	14.32	15.03	11.27	12.6	17.47	14.0925	15.82	18.84	14.44	15	16.025	21.32	22.81	20.17	17.89	20.5475
CSS0000967.1	CSS0000967	0.07	0	0.2	0.13	0.1	0.06	0	0	0.08	0.035	0	0.07	0.13	0	0.05	0	0	0	0	0	0.07	0	0	0.07	0.035
CSS0000968.1	CSS0000968	27.18	37.26	32.76	29.75	31.7375	29.49	30.81	33.25	29.13	30.67	32.19	24.39	28.84	33.93	29.8375	26.96	29.15	32.06	36.07	31.06	35.56	33.13	36.58	33.96	34.8075
CSS0000969.1	CSS0000969	2.42	2.8	2.6	2.43	2.5625	2.21	1.74	1.93	1.26	1.785	1.86	1.24	1.65	3.19	1.985	1.73	1.12	1.75	1.8	1.6	2.15	2.15	2.33	2.54	2.2925
CSS0000970.1	CSS0000970	2.64	0.99	1.81	2.12	1.89	3.07	0.53	1.68	0.82	1.525	2.61	1.15	0.87	1.32	1.4875	0.96	0.71	1.68	3.91	1.815	0.81	2.11	1.56	3.58	2.015
CSS0000971.1	CSS0000971	2.31	2.11	2.26	2.41	2.2725	1.34	2.04	1.34	1.68	1.6	1.69	1.69	1.56	1.94	1.72	1.24	0.95	1.46	1.92	1.3925	2.36	2.83	2.25	3.07	2.6275
CSS0000972.1	CSS0000972	139.61	123.2	156.32	122.77	135.475	120.83	108.34	136.84	93.4	114.852	177.15	148.25	183.97	157.09	166.615	96.79	89.86	103.98	158.43	112.265	119.32	104.33	140.46	155.64	129.938
CSS0000973.1	CSS0000973	72.1	61.18	58.07	64.28	63.9075	46.3	63.45	65.6	53.6	57.2375	41.47	48.11	52.5	43.44	46.38	46.03	63.07	64.79	50.13	56.005	68.95	71.62	71.06	68.75	70.095
CSS0000974.1	CSS0000974	22.57	18.35	17.2	19.55	19.4175	15.94	14.91	13.54	14.41	14.7	11.97	17.83	15.53	12.35	14.42	9.44	10.35	12.83	14.57	11.7975	12.57	10.89	14.74	16.67	13.7175
CSS0000975.1	CSS0000975	0	0	0	0	0	0	0	0	0	0	0	0	0	0	0	0	0	0	0	0	0	0	0	0	0
CSS0000976.1	CSS0000976	9.19	10.55	10.85	9.19	9.945	6.33	5.21	7.31	11.02	7.4675	8.06	6.83	6.73	9.41	7.7575	7.83	2.84	10.04	14.12	8.7075	6.75	5.55	9.68	12.64	8.655
CSS0000977.1	CSS0000977	3.97	7.36	7.69	2.47	5.3725	6.37	1.28	6.07	10.38	6.025	3.46	0	0	2.93	1.5975	3.86	4.97	6.11	0	3.735	0	0	4.5	0	1.125
CSS0000978.1	CSS0000978	2.23	1.1	1.23	1.53	1.5225	0.45	1.42	1.21	1.24	1.08	0.84	0.75	0.83	0.64	0.765	0.68	1.05	0.49	0.91	0.7825	0.47	1.17	0.49	0.47	0.65
CSS0000979.1	CSS0000979	0.24	0.1	0	0.48	0.205	0	0	0.18	0.11	0.0725	0.19	0.11	0.09	0.11	0.125	0.49	0.29	0	0.2	0.245	0.1	0	0.59	0.2	0.2225
CSS0000980.1	CSS0000980	0	0	0	0	0	0	0	0	0	0	0	0	0	0.18	0.045	0.17	0	0	0	0.0425	0	0	0	0	0
CSS0000981.1	CSS0000981	0	0	0	0	0	0	0	0	0.22	0.055	0	0	0	0	0	0	0	0	0	0	0	0	0	0	0
CSS0000982.1	CSS0000982	8.47	6.91	7.89	6.25	7.38	3.78	4.37	4.18	2.92	3.8125	4.6	3.88	3.52	4.43	4.1075	4.57	5.34	3.17	6.73	4.9525	7.34	6.85	7.2	8.23	7.405
CSS0000983.1	CSS0000983	1.6	0.96	1.56	1.53	1.4125	0.93	1.84	0.75	0.79	1.0775	1.23	0.94	1.16	1.49	1.205	0.43	0.43	0.34	1.03	0.5575	0.48	0.82	1.73	1.15	1.045
CSS0000984.1	CSS0000984	1.17	1.81	1.35	2.32	1.6625	3.06	1.88	0.67	1.73	1.835	2.2	0.85	0.84	2.32	1.5525	1.64	1.1	1.94	0.79	1.3675	1.57	0.95	1.59	1.29	1.35
CSS0000985.1	CSS0000985	1.39	1.42	1.11	0.72	1.16	1.37	0.96	1.27	0.66	1.065	1.42	1.18	0.9	1.33	1.2075	0.98	0.96	1.08	1.26	1.07	1.02	1.9	1.55	1.34	1.4525
CSS0000986.1	CSS0000986	17.58	20.13	8.83	10.51	14.2625	8.55	13.71	8.97	5.72	9.2375	8.9	3.83	6.02	14.05	8.2	7.87	6.59	9.02	8.84	8.08	10.58	9.21	21.24	13.55	13.645
CSS0000987.1	CSS0000987	1.68	3.47	3.13	1.27	2.3875	0.37	1.49	1.4	0.15	0.8525	0.37	0.02	0.49	0.65	0.3825	1.28	0.05	0.39	0.83	0.6375	2.23	0.43	0	0.78	0.86
CSS0000988.1	CSS0000988	0.58	0.86	0.51	0.98	0.7325	0.83	0.77	0.52	0.37	0.6225	0.41	0.25	0.4	0.34	0.35	0.69	0.31	0.75	0.44	0.5475	0.56	0.9	0.47	0.36	0.5725
CSS0000989.1	CSS0000989	0	0	0	0	0	0	0	0	0	0	0	0	0	0	0	0	0	0	0	0	0	0	0	0	0
CSS0000990.1	CSS0000990	1.22	0.32	1.47	1.2	1.0525	0.28	0.29	0.27	0	0.21	0.29	0.88	0	0	0.2925	0.91	0.3	1.52	0.32	0.7625	0.59	0.61	0.93	0.3	0.6075
CSS0000991.1	CSS0000991	0	0	0	0.09	0.0225	0.18	0	0	0	0.045	0	0.09	0.36	0.1	0.1375	0	0.19	0.29	0.2	0.17	0.09	0.19	0	0	0.07
CSS0000992.1	CSS0000992	2.54	1.76	1.46	1.47	1.8075	0.87	1.39	0.77	1.05	1.02	1.16	1.48	1.9	1.18	1.43	1.24	0.88	1.33	0.89	1.085	1.91	1.47	1.53	1.3	1.5525
CSS0000993.1	CSS0000993	4.22	2.45	2.59	3.98	3.31	0.93	0.81	2.06	0.57	1.0925	2.43	1.62	1.89	1.87	1.9525	0.67	0.66	1.01	1.07	0.8525	1.8	3.37	2.4	1.99	2.39
CSS0000994.1	CSS0000994	0.33	0	0.23	0.1	0.165	0.09	0.09	0	0.09	0.0675	0.22	0.07	0	0	0.0725	0	0.18	0	0.08	0.065	0.07	0	0.15	0	0.055
CSS0000995.1	CSS0000995	1.1	0.85	0.75	1.98	1.17	0.32	1.48	1.06	1.13	0.9975	0.44	0.53	0.92	1.63	0.88	0.83	0.68	0.56	0.92	0.7475	0.74	1.57	0.27	2.09	1.1675
CSS0000996.1	CSS0000996	312.98	319.62	361.77	331.43	331.45	323.46	301.26	369.96	327.35	330.508	294.9	310.23	303.95	276.07	296.287	373.65	374.37	361.96	315.99	356.493	367.49	358.32	315.04	325.54	341.597
CSS0000997.1	CSS0000997	1.46	1.17	0.74	0.4	0.9425	2.36	2.62	1.66	3.3	2.485	0.26	0.98	0.78	1.55	0.8925	2.98	2.18	1.96	2.07	2.2975	1.42	1.13	0.57	0.42	0.885
CSS0000998.1	CSS0000998	1.45	0.49	1.58	1.65	1.2925	1.43	1.96	1.85	0.56	1.45	1.57	2.39	1.47	2.02	1.8625	0.78	1.38	1.61	1.85	1.405	2	2.04	1.32	1.84	1.8
CSS0000999.2	CSS0000999	11.72	11.3	9.74	13.38	11.535	8.93	10.63	8.12	7.93	8.9025	10.44	12.59	8.69	12.39	11.0275	7.79	7.44	8.62	10.95	8.7	8.96	10.39	11.8	10.23	10.345
CSS0001000.1	CSS0001000	26.41	27.09	24.41	24.71	25.655	21.81	27.1	26.35	22.97	24.5575	27.72	28.32	27.08	32.99	29.0275	24.44	30.29	31.61	32.64	29.745	32.92	34.71	33.63	33.01	33.5675
CSS0001001.1	CSS0001001	27.59	27.11	26	26.27	26.7425	21.16	27.97	22.2	19.2	22.6325	29.58	26.41	21.59	27.69	26.3175	25.35	24.85	24.78	27.74	25.68	32.17	34.1	27.69	33.02	31.745
CSS0001002.1	CSS0001002	4.07	3.08	2.41	2.27	2.9575	3.37	1.9	1.5	3.01	2.445	1.79	1.97	2.21	2.85	2.205	2.99	2.81	2.06	2.44	2.575	2.61	1.03	1.69	2.26	1.8975
CSS0001003.1	CSS0001003	0	0	0	0	0	0	0.66	0	0	0.165	0	0	0	1.59	0.3975	0	0	0	0.75	0.1875	0	0	0	0	0
CSS0001004.1	CSS0001004	0	0	0	0	0	0	0	0.35	0	0.0875	0	0	0	0	0	0	0	0	0	0	0	0	0	0	0
CSS0001005.1	CSS0001005	0.68	0.79	0.71	0.42	0.65	0.28	0.42	0.84	0.05	0.3975	0.58	0.25	0.29	0.37	0.3725	0.3	0.17	0.26	0.58	0.3275	0.83	0.3	0.94	0.87	0.735
CSS0001006.1	CSS0001006	0	0	0	0	0	0	0	0	0	0	0	0.11	0	0	0.0275	0	0	0	0	0	0	0	0	0	0
CSS0001007.1	CSS0001007	78.42	99.44	74.91	55.85	77.155	213.45	166.94	125.84	242.3	187.132	147.48	178.23	192.9	178.07	174.17	229.58	167.3	155.85	79.15	157.97	53.83	73.18	70.68	43.08	60.1925
CSS0001008.1	CSS0001008	31.08	36.44	37.95	35.7	35.2925	31.1	33.71	31.74	26.38	30.7325	38.57	34.72	31.79	44.33	37.3525	28.76	34.09	36.76	57.71	39.33	45.64	45.45	44.95	45.44	45.37
CSS0001009.1	CSS0001009	3.8	2.93	3.17	4.11	3.5025	4.16	1.77	1.38	2.75	2.515	1.21	1.7	1.24	1.31	1.365	8.54	3.63	2.55	1.09	3.9525	1.64	2.65	1.66	2.12	2.0175
CSS0001010.1	CSS0001010	0.83	0.57	0.36	0.45	0.5525	0.95	0.54	0.9	1.07	0.865	0.36	0.54	0.44	0.1	0.36	0.28	0.55	0.19	0.1	0.28	0.36	0.19	0.56	1.08	0.5475
CSS0001011.1	CSS0001011	464.2	440.56	429.84	462.42	449.255	452.81	489.55	408.58	416	441.735	445.99	506.81	479.61	519.83	488.06	306.88	339.71	422.96	390.33	364.97	304.11	327.58	433.99	498.97	391.163
CSS0001012.1	CSS0001012	4.27	4.19	4.62	4.57	4.4125	1.77	0.83	2.11	1.43	1.535	3.3	2.29	1.45	1.55	2.1475	1.9	1.21	1.83	2.56	1.875	2.02	2.78	2.38	3.03	2.5525
CSS0001013.1	CSS0001013	0	0	0	0	0	0	0	0	0	0	0	0	0	0	0	0	0	0	0	0	0	0	0	0	0
CSS0001014.1	CSS0001014	3.13	2.59	3.17	2.51	2.85	1.19	5.7	2.8	1.49	2.795	1.83	1.23	3.08	1.36	1.875	2.57	3.81	3.26	1.3	2.735	3.72	1.93	3.25	1.24	2.535
CSS0001015.1	CSS0001015	0	0	0	0	0	0	0	0	0	0	0	0	0	0	0	0	0	0	0	0	0	0	0	0	0
CSS0001016.1	CSS0001016	0.03	0.38	0.03	0	0.11	0	0	0	0.14	0.035	0.26	0.17	0	0	0.1075	0	0	0.12	0.12	0.06	0	0	0	0.12	0.03
CSS0001017.1	CSS0001017	19.15	16.4	17.72	24.08	19.3375	10.33	24.41	18.79	11.92	16.3625	10.76	21.64	8.41	17.87	14.67	9.22	5.58	14.42	16.8	11.505	31.84	20.32	10.1	11.53	18.4475
CSS0001018.1	CSS0001018	8.99	8.16	7.62	9.39	8.54	6.53	7.61	6.09	6.19	6.605	12.05	8.06	10.55	9.67	10.0825	5.97	6.52	5.72	6.83	6.26	11.65	9.97	11.94	9.82	10.845
CSS0001019.1	CSS0001019	22.46	19.13	8.24	14.57	16.1	23.5	11.37	9.99	6.81	12.9175	19.02	15.82	15.04	12.21	15.5225	21.27	15.44	14.2	17	16.9775	16.75	18.05	16.91	19.72	17.8575
CSS0001020.1	CSS0001020	0.89	0	0.26	0.03	0.295	0	0	0.19	0	0.0475	0.36	0.2	0.3	0	0.215	0	0.4	0.14	0.12	0.165	0	0	0	0	0
CSS0001021.1	CSS0001021	104.5	124	133.33	109.72	117.888	146.89	123.5	130.56	120.47	130.355	130.75	111.13	106.26	114.46	115.65	158.29	118.86	120.73	135.99	133.468	153.8	165.14	131.08	139.31	147.332
CSS0001022.1	CSS0001022	12.1	12.91	12.87	15.1	13.245	7.13	10.62	8.09	10.06	8.975	7.47	8.23	7.75	8.4	7.9625	9.59	10.8	10.8	8.16	9.8375	10.41	8.64	9.89	10.88	9.955
CSS0001023.1	CSS0001023	0.48	0.49	0.23	0.16	0.34	0	0.15	0	0.18	0.0825	0.08	0	0	0	0.02	0.08	0.31	0.08	0	0.1175	0	0	0.08	0	0.02
CSS0001024.1	CSS0001024	0.58	0.59	0.36	0.9	0.6075	0.47	0.23	0.28	0.41	0.3475	0.06	0.37	0.56	0.13	0.28	0.06	0.32	0.12	0.18	0.17	0.22	0.47	0.52	1.06	0.5675
CSS0001025.1	CSS0001025	0	0	0	0	0	0	0	0	0	0	0	0	0	0	0	0	0	0	0	0	0	0	0	0	0
CSS0001026.1	CSS0001026	0	0	0	0	0	0	0	0	0	0	0	0	0	0	0	0	0	0	0	0	0	0	0	0	0
CSS0001027.1	CSS0001027	1.3	1.41	1.22	1.15	1.27	0.83	0.94	0.93	0.7	0.85	1.32	1.14	0.8	1.32	1.145	1.48	1.39	0.76	1.25	1.22	1.77	1.98	1.55	1.32	1.655
CSS0001028.1	CSS0001028	0	0	0	0	0	0	0	0	0	0	0	0	0	0	0	0	0	0	0	0	0	0	0	0	0
CSS0001029.1	CSS0001029	0.85	0.59	0.82	0.56	0.705	0	0.54	1.25	0.32	0.5275	1.36	0.27	0	0	0.4075	0	0	0.29	0.3	0.1475	0.28	0.85	0	0.28	0.3525
CSS0001030.1	CSS0001030	1.62	1.96	1.56	1.33	1.6175	3	2.61	3.07	2.14	2.705	4.15	2.07	2.54	1.79	2.6375	1.34	1.59	2.43	3.69	2.2625	2.1	1.62	2.73	2.38	2.2075
CSS0001031.1	CSS0001031	0	0	0	0	0	0	0	0	0	0	0	0	0	0	0	0	0	0	0	0	0	0	0	0	0
CSS0001032.1	CSS0001032	0	0	0	0	0	0	0	0	0	0	0	0	0	0	0	0	0	0	0	0	0	0	0	0	0
CSS0001033.2	CSS0001033	24.03	26.62	23.73	20.19	23.6425	16.65	13.77	15.53	14.08	15.0075	13.94	13.03	12.32	12.95	13.06	18.67	17.03	16.13	14.83	16.665	16.49	17.87	15.89	17.78	17.0075
CSS0001034.1	CSS0001034	5.99	5.26	6.53	4.67	5.6125	4.37	7.07	5.59	4.49	5.38	5.84	5.27	5.1	6.55	5.69	6.25	6.45	5.79	6.04	6.1325	7.83	8.08	7.48	8.41	7.95
CSS0001035.1	CSS0001035	0	0	0	0	0	6.82	0	0	0	1.705	0	0	0	0	0	0	0	0	0	0	0	0	0	0	0
CSS0001036.1	CSS0001036	0	0	0	0	0	0	0	0	0	0	0	0	0	0	0	0	0	0	0	0	0	0	0	0	0
CSS0001037.1	CSS0001037	48.91	50.45	45.73	51.24	49.0825	40.08	47.83	40.52	37.38	41.4525	46.83	45.07	44.31	49.03	46.31	36.33	39.4	36.51	47.64	39.97	38.72	44.24	46	46.89	43.9625
CSS0001038.1	CSS0001038	1.15	0.74	2.01	0.99	1.2225	0.63	0.56	0.72	0.5	0.6025	0.88	0.69	0.41	1.2	0.795	0.53	0.52	0.44	1.24	0.6825	0.83	0.48	0.43	0.88	0.655
CSS0001039.1	CSS0001039	44.57	47.54	47.18	46.87	46.54	48.33	47.85	42.16	48.92	46.815	58.38	46.62	59.01	56.41	55.105	46.34	38.9	47.88	44.85	44.4925	35.24	48.69	47.43	46.94	44.575
CSS0001040.1	CSS0001040	0.38	0.6	0.58	0.31	0.4675	0.45	0.54	0.12	0.65	0.44	0.67	0.44	0.4	1.13	0.66	0.91	0.68	0.57	0.32	0.62	0.44	0.25	0.45	0.2	0.335
CSS0001041.1	CSS0001041	0	0	0	0	0	0	0	0.07	0	0.0175	0	0	0	0	0	0	0	0	0	0	0.08	0	0	0	0.02
CSS0001042.1	CSS0001042	0	0	0	0	0	0	0	0	0	0	0.27	0	0	0	0.0675	0	0	0	0	0	0	0	0	0	0
CSS0001043.1	CSS0001043	1.03	1.06	0	0.33	0.605	0	0.33	0	0.76	0.2725	0.98	0.66	0.32	0.38	0.585	0.34	1.34	0	2.46	1.035	0	0	0.69	1.01	0.425
CSS0001044.1	CSS0001044	7.03	14.76	11.99	12.38	11.54	9.63	17.88	8.37	6.14	10.505	14.68	12.7	10.9	13.52	12.95	7.6	2.75	3.43	15.85	7.4075	13.71	6.94	13.78	10.5	11.2325
CSS0001045.1	CSS0001045	13.11	11.75	12.34	12.68	12.47	7.58	11.61	8.66	9.1	9.2375	11.87	9.85	8.67	12.54	10.7325	9.52	8.16	10.24	10.24	9.54	11.06	13.2	13.28	10.73	12.0675
CSS0001046.1	CSS0001046	14.63	9.46	8.38	9.39	10.465	7.61	10.56	5.66	8.63	8.115	9.4	9.97	9.85	9.28	9.625	7.07	8.09	4.72	8.83	7.1775	6.28	9.83	10.27	12.42	9.7
CSS0001047.1	CSS0001047	0	0	0	0	0	0	0	0	0	0	0	0	0	0	0	0	0	0	0	0	0	0	0	0	0
CSS0001048.1	CSS0001048	0	0	0	0	0	0	0	0	0	0	0	0	0	0	0	0	0	0	0	0	0	0	0	0	0
CSS0001049.1	CSS0001049	0	0	0	0	0	32.12	42.39	14.21	29.57	29.5725	0	16.93	5.11	14.43	9.1175	39.1	5.79	27.45	6.75	19.7725	0	0	0	0	0
CSS0001050.1	CSS0001050	16.71	19.05	16.1	21.57	18.3575	19.39	28.16	21.1	20.21	22.215	19.71	25.65	26.89	21.76	23.5025	17.41	15.65	24.09	19.68	19.2075	23.06	23.61	24.91	25.17	24.1875
CSS0001051.1	CSS0001051	1.86	1.54	4.99	2.55	2.735	2.4	1.07	5.16	0.83	2.365	1.42	1.07	1.38	0.41	1.07	1.11	1.09	1.84	1.96	1.5	3.25	3.34	3.78	2.93	3.325
CSS0001052.1	CSS0001052	1.9	1.94	2.07	2.3	2.0525	5.83	4.2	2.4	6.13	4.64	1.78	1.96	2.06	2.61	2.1025	8.62	4.55	5.19	1.28	4.91	0.58	1.32	1.14	1.15	1.0475
CSS0001053.1	CSS0001053	0.27	0	0	0	0.0675	0.53	0.64	0	0	0.2925	0	0	0	0.53	0.1325	0	0	0	0.6	0.15	0	0	0	0	0
CSS0001054.1	CSS0001054	53.38	54.93	53.15	52.55	53.5025	34.55	47.52	34.52	41.96	39.6375	39.1	38.02	37.85	37.13	38.025	37.6	39.55	39.67	31.77	37.1475	42.59	43.42	46.63	41.65	43.5725
CSS0001055.1	CSS0001055	0	0	0.1	0.07	0.0425	0.03	0.06	0.09	0.08	0.065	0.18	0.06	0.16	0	0.1	0	0.03	0.04	0.1	0.0425	0	0	0.26	0.03	0.0725
CSS0001056.1	CSS0001056	0.2	0	1.77	4.32	1.5725	3.43	0.5	1.08	0	1.2525	0	1.08	0	3.89	1.2425	1.05	0.09	6.3	0	1.86	3.79	3.59	1.59	4.79	3.44
CSS0001057.1	CSS0001057	0	0	0	0	0	0	0	0	0	0	0	0	0	0	0	0	0	0	0	0	0	0	0	0	0
CSS0001058.1	CSS0001058	0	2.13	2.21	0.9	1.31	0.42	0.66	1.01	0.78	0.7175	0.88	1.54	0.22	0.5	0.785	0.91	0.45	0.46	0.96	0.695	2	1.38	2.08	2.24	1.925
CSS0001059.1	CSS0001059	6.55	6.64	8.81	5.9	6.975	4.5	3.34	4.59	3.45	3.97	6.52	4.87	4.59	5.19	5.2925	5.65	3.86	3.62	11.05	6.045	11.85	8.08	6.09	9.18	8.8
CSS0001060.1	CSS0001060	0.4	0	0.38	0	0.195	2.95	2.3	2.77	4.48	3.125	0.77	0.76	1.49	0.45	0.8675	3.57	6.29	0.79	0	2.6625	0	0	0.41	0	0.1025
CSS0001061.1	CSS0001061	21.74	0	0	0	5.435	0	0	0	41.16	10.29	0	0	0	0	0	20.29	0	0	0	5.0725	21.16	0	0	0	5.29
CSS0001062.1	CSS0001062	79.72	66.66	60.99	76.29	70.915	29.22	22.2	29.33	18.59	24.835	34.6	25.99	17.94	22.54	25.2675	16.55	42.71	32.64	26.71	29.6525	51.66	57.88	39.16	52.65	50.3375
CSS0001063.1	CSS0001063	0	0	2.55	0	0.6375	0	0	0	0	0	0	0	0	0	0	3.99	0	0	0	0.9975	0	0	0	0	0
CSS0001064.1	CSS0001064	2.58	0.74	0.92	2.92	1.79	0.5	1.26	0.94	0	0.675	1.31	1.05	1.23	1.4	1.2475	1.78	1.97	0.73	0.82	1.325	0.54	0	0	1.72	0.565
CSS0001065.1	CSS0001065	3.22	2.89	2.82	3.04	2.9925	0.82	3.15	1.19	1.28	1.61	2.26	1.66	1.99	1.17	1.77	1.31	2.38	1.15	1.8	1.66	1.74	2.62	2.01	2.51	2.22
CSS0001066.1	CSS0001066	2.84	3.36	3.23	2.76	3.0475	0.92	1.68	2.07	1.35	1.505	2.97	2.04	2.28	2.38	2.4175	1.58	2.53	1.66	4.45	2.555	6.11	4.28	4.27	4.86	4.88
CSS0001067.1	CSS0001067	0.06	0.08	0.06	0.03	0.0575	0	0.03	0.03	0	0.015	0.03	0	0.03	0.03	0.0225	0	0	0.1	0.09	0.0475	0.07	0	0.06	0.02	0.0375
CSS0001068.1	CSS0001068	10.02	10.39	10.07	17.32	11.95	13.87	11.53	10.41	12.03	11.96	14.17	13.26	12.2	8.56	12.0475	5.01	11.65	11.08	12.72	10.115	13.07	12.05	16.53	15.29	14.235
CSS0001069.1	CSS0001069	0.76	0	0.22	0	0.245	0.28	0	0.13	0	0.1025	0.15	0	0	0.08	0.0575	0	0	0.15	0	0.0375	0.07	0.08	0	0	0.0375
CSS0001070.1	CSS0001070	14.29	13.25	13.26	12.92	13.43	20.26	14.18	14.13	16.78	16.3375	14.3	13.05	14.97	17.34	14.915	18.68	13.57	11.84	9.91	13.5	13.32	12.07	11.89	11.38	12.165
CSS0001071.1	CSS0001071	0.52	1.1	0.48	1.04	0.785	0	1.27	0.89	1.41	0.8925	5.36	0	2.56	1.74	2.415	2.6	0.51	0	1.24	1.0875	4.61	2.05	2.71	0.51	2.47
CSS0001072.1	CSS0001072	11	5.88	1.52	5.95	6.0875	7.59	5.14	7.07	8.04	6.96	4.36	2.92	5.49	1.53	3.575	5.79	3.12	5.96	3.88	4.6875	7.55	6.31	5.56	5.16	6.145
CSS0001073.1	CSS0001073	1	0.74	0.69	0.86	0.8225	0.66	0.94	0.73	0.71	0.76	0.68	1.15	0.62	1.02	0.8675	0.8	0.99	0.74	0.83	0.84	1.22	1.42	1.09	0.91	1.16
CSS0001074.1	CSS0001074	0.62	1.9	1.38	0.93	1.2075	0.91	1.11	0.8	1.34	1.04	1.18	1.07	1.5	0.9	1.1625	1.71	0.6	0.97	0.8	1.02	2.01	2.15	1.53	1.57	1.815
CSS0001075.1	CSS0001075	0.12	0.37	0.12	1.18	0.4475	0.67	0.81	0.63	0.82	0.7325	0.92	0.23	0	0.13	0.32	0.12	0.24	0.12	0.13	0.1525	0.46	0.72	0.12	0.47	0.4425
CSS0001076.2	CSS0001076	7.4	5.76	8.18	7.19	7.1325	4.94	9.09	5.42	7.18	6.6575	6.38	7.06	7.56	8.85	7.4625	7.82	8.57	7.7	8.72	8.2025	11.22	8.99	9.52	7.08	9.2025
CSS0001077.1	CSS0001077	10.46	9.32	9.93	8.47	9.545	8.95	8.15	5.23	3.99	6.58	6.32	9.67	7.57	9.25	8.2025	9.62	5.05	6.18	7.29	7.035	9.54	7.83	11.38	9.41	9.54
CSS0001078.1	CSS0001078	0	0	1.05	0	0.2625	0	0	0	0	0	0	0	0	1.23	0.3075	0	0	0	0	0	1.07	0	0	0.55	0.405
CSS0001079.1	CSS0001079	13.85	13.55	12.75	10.66	12.7025	8.85	9.44	9.1	7.4	8.6975	12.18	8.93	9	10.36	10.1175	8.67	7.45	7.07	8.53	7.93	9.25	11.02	14.63	9.19	11.0225
CSS0001080.1	CSS0001080	19.5	16.56	15.53	20.31	17.975	6.43	5.22	5.94	1.65	4.81	13.91	9.12	5.49	7.8	9.08	5.2	8.75	4.44	4.15	5.635	5.38	11.01	7.78	7.75	7.98
CSS0001081.1	CSS0001081	15.13	23.35	17.54	21.08	19.275	4.62	11.85	17.71	10.38	11.14	12.75	19.3	18.46	16.05	16.64	4	10.82	7.49	20.39	10.675	21.43	16.7	22.64	21.69	20.615
CSS0001082.1	CSS0001082	0	0	0	0	0	0	0	0	0	0	0	0	0	0	0	0	0	0	0	0	0	0	0	0	0
CSS0001083.1	CSS0001083	80.58	86.02	80.77	82.58	82.4875	74.71	82.72	85.32	82.7	81.3625	87.76	85.69	90.97	107.96	93.095	84.62	89.06	89.21	99.64	90.6325	94.21	90.01	92.15	96.08	93.1125
CSS0001084.1	CSS0001084	3.96	4.64	4.62	2.34	3.89	2.6	1.28	0.87	0.51	1.315	3.52	2.44	1.58	3.25	2.6975	2.5	1.05	0.8	0.77	1.28	2.09	2.26	1.64	1.55	1.885
CSS0001085.1	CSS0001085	57.45	54.4	49.75	52.31	53.4775	36.87	50.24	42.18	41.69	42.745	46.2	44.95	42.53	47.61	45.3225	38.46	39.6	45.45	49.99	43.375	43.59	47.19	55.88	55.24	50.475
CSS0001086.1	CSS0001086	0	0	2.7	2.83	1.3825	0	0	7.13	0	1.7825	0	0	2.55	3.48	1.5075	0	2.86	0	0	0.715	0	0	3.14	0	0.785
CSS0001087.1	CSS0001087	134.99	196.55	105.05	61.85	124.61	323.83	154.16	111.52	159.37	187.22	282.14	465.25	309.2	418.05	368.66	343.58	210.23	165.59	34.28	188.42	183.6	130.24	115.53	51.08	120.112
CSS0001088.2	CSS0001088	43.62	46.47	42.94	40.37	43.35	39.92	32.47	30.4	29.27	33.015	54.46	42.63	37.39	49.26	45.935	39.51	37.39	36.73	42.11	38.935	32.74	36.09	36.6	39.41	36.21
CSS0001089.1	CSS0001089	10.23	11.15	12.99	13.25	11.905	5.43	7.84	7.42	5.94	6.6575	10.42	8.37	5.76	8.03	8.145	5.63	6.92	5.91	6.44	6.225	4.36	6.92	8.32	8.99	7.1475
CSS0001090.1	CSS0001090	0	0	0	0	0	0	0	0	0	0	0	0	0	0	0	0	0	0	0	0	0	0	0	0	0
CSS0001091.1	CSS0001091	0	0	0	0	0	0	0	0	0	0	0	0	0	0.05	0.0125	0	0	0	0	0	0	0.05	0	0	0.0125
CSS0001092.1	CSS0001092	1.81	1.75	1.04	1.36	1.49	0.55	0.63	0.81	0.68	0.6675	1.03	1.29	0.92	1.51	1.1875	0.43	0.52	0.38	1.05	0.595	1.28	1.56	0.59	1.49	1.23
CSS0001093.1	CSS0001093	0	0	0	0	0	0	0	0	0	0	0	0	0	0	0	0	0	0	0	0	0	0	0	0	0
CSS0001094.1	CSS0001094	1.76	2.65	1.78	1.42	1.9025	1.19	3.1	1.35	1.93	1.8925	1.26	1.67	1.77	2.14	1.71	2.5	2.14	2.44	2.89	2.4925	0.98	1.79	3.25	2.39	2.1025
CSS0001095.1	CSS0001095	0	0	0	0	0	0	0.38	0	0.44	0.205	0	0	0	0.44	0.11	0	0	0	0	0	0	0	0	0.78	0.195
CSS0001096.1	CSS0001096	38.68	31.86	24.4	37.44	33.095	73.71	48.22	62.78	139.16	80.9675	50.11	63.9	94.94	62.06	67.7525	111.34	129.41	125.42	44.72	102.722	47.23	41.81	51.81	35.36	44.0525
CSS0001097.1	CSS0001097	6.39	6.68	5.96	5.55	6.145	3.98	5.23	4.78	3.94	4.4825	5.59	5.23	5.03	6.13	5.495	4.58	5.1	5.32	6.89	5.4725	7.14	6.53	6.68	7.52	6.9675
CSS0001098.1	CSS0001098	0	0	0	0	0	0	0	0	0	0	0	0	0	0	0	13.59	0	0	0	3.3975	0	0	0	0	0
CSS0001099.1	CSS0001099	0	0	0	0	0	0	0	0	0	0	0	0	0	0	0	0	0	0	0	0	0	0	0	0	0
CSS0001100.1	CSS0001100	0.07	0.04	0.07	0	0.045	0	0.07	0.07	0	0.035	0	0.03	0	0.04	0.0175	0	0.04	0	0.11	0.0375	0.1	0	0	0.08	0.045
CSS0001101.1	CSS0001101	3.99	2.93	4.36	4.03	3.8275	3.37	0.74	3.98	0.69	2.195	2.4	2.35	1.55	1.29	1.8975	2.38	3.24	2.58	2.68	2.72	3.9	3.92	3.55	3.13	3.625
CSS0001102.1	CSS0001102	26.7	35.48	34.05	32.45	32.17	18.45	20.21	22.17	17.14	19.4925	24.54	27.66	25.67	27.06	26.2325	14.06	17.87	20.95	29.66	20.635	42.94	33.37	46.91	46.7	42.48
CSS0001103.1	CSS0001103	2.41	2.89	3.59	2.93	2.955	5.05	3.91	3.88	4.74	4.395	3.57	2.93	2.33	3.29	3.03	12.45	8.08	5.59	4.3	7.605	3.95	3.81	4.44	3.72	3.98
CSS0001104.1	CSS0001104	56.89	52.47	48.47	50.75	52.145	68.09	71.02	56.47	73.38	67.24	61.95	61.86	59.08	75.44	64.5825	76.05	72.48	71.87	66.55	71.7375	56.94	63	62.52	58.16	60.155
CSS0001105.1	CSS0001105	54.98	50.66	49.09	50.5	51.3075	45.34	48.3	41.18	29.5	41.08	51.19	46.97	46.46	49.38	48.5	34.53	36.45	36.69	54.7	40.5925	50.47	53.06	54.17	56.2	53.475
CSS0001106.1	CSS0001106	5.84	5.47	3.61	4.86	4.945	7.73	4.77	2.1	1.3	3.975	13.17	7.19	4.37	7.57	8.075	5.76	2.1	1.6	8.32	4.445	2.83	3.69	4.76	1.15	3.1075
CSS0001107.1	CSS0001107	16.31	14.6	12.25	9.8	13.24	20.97	10.11	18.66	12.74	15.62	26.16	15.08	18.47	21.33	20.26	16.17	22.09	31.12	18.96	22.085	15.19	8.02	9.52	4.8	9.3825
CSS0001108.1	CSS0001108	3.74	5.41	2.48	3.15	3.695	3.97	3.42	3.76	2.44	3.3975	3.4	3.39	3.23	2.71	3.1825	3.52	2.94	2.68	2.35	2.8725	2.28	3.22	4.63	3.44	3.3925
CSS0001109.1	CSS0001109	0.37	0	0.09	0.18	0.16	0.17	0.04	0.12	0.21	0.135	0.75	0.27	0.13	0.35	0.375	0	0	0.14	0.19	0.0825	0.18	0.14	0	0.09	0.1025
CSS0001110.1	CSS0001110	1.07	7.41	0	5.04	3.38	0	0	0.04	4.54	1.145	0	0	0	3.73	0.9325	1.57	0	0	0	0.3925	0.28	0	0	0.62	0.225
CSS0001111.1	CSS0001111	0	0	0	0	0	0	0	0	0	0	0	0	0	0	0	0	0	0	0	0	0	0	0	0	0
CSS0001112.1	CSS0001112	6.05	8.96	3.8	5.87	6.17	2.17	5.6	8.06	2.57	4.6	9.1	3.42	5.4	2.78	5.175	7.04	2.34	5.76	9.18	6.08	4.71	7.07	3.78	3.62	4.795
CSS0001113.1	CSS0001113	0	0	0	0	0	0	0.22	0	0.26	0.12	0	0.65	0	0	0.1625	0	0	0	0	0	0	0	0.46	0	0.115
CSS0001114.1	CSS0001114	0	0	0	0	0	0	0	0	0	0	0	0	0	0	0	0	0	0	0	0	0	0	0	0	0
CSS0001115.1	CSS0001115	0	0	0	0	0	0	0	0	0	0	0	0	0.1	0	0.025	0	0	0	0	0	0	0	0.1	0	0.025
CSS0001116.1	CSS0001116	0	0	0	0	0	0	0	0	0	0	0	0	0	0	0	0	0	0	1.1	0.275	0	0	0	0	0
CSS0001117.1	CSS0001117	0	0	0	0.11	0.0275	0	0	0.29	0	0.0725	0	0	0	0	0	0	0	0	0	0	0	0	0	0	0
CSS0001118.1	CSS0001118	7.77	7.89	7.89	7.65	7.8	5.05	2.13	5.24	3.17	3.8975	10.17	6.53	5.61	6.27	7.145	3.76	5.79	3.61	7.87	5.2575	13.71	12.57	9.37	8.8	11.1125
CSS0001119.1	CSS0001119	16.36	16.93	16.51	20.7	17.625	14.97	17.96	13.35	12.82	14.775	23.49	18.85	13.7	25.55	20.3975	13.54	15.82	12.05	10.76	13.0425	13.36	18.67	14.16	14.09	15.07
CSS0001120.1	CSS0001120	31.21	32.36	35.4	30.97	32.485	22.28	26.47	24.27	24.79	24.4525	21.65	29.04	22.3	24.99	24.495	19.36	22.79	20.95	33.85	24.2375	32.4	33.72	38.87	29.46	33.6125
CSS0001121.1	CSS0001121	0	0.13	0.25	0.13	0.1275	0	0	0.11	0.15	0.065	0.06	0	0	0	0.015	0.13	0.25	0.26	0	0.16	0	0.26	0	0	0.065
CSS0001122.1	CSS0001122	90.95	94.29	98.61	78.17	90.505	95.89	81.52	96.49	93.28	91.795	92.49	107.14	96.65	92.06	97.085	82.77	99.32	98.06	133.86	103.502	121.53	96.83	104.99	120.95	111.075
CSS0001123.1	CSS0001123	0.91	0	1.48	3.23	1.405	0	0	0.9	0	0.225	1.18	0.59	1.2	0	0.7425	0	0.54	0	0.96	0.375	0.58	0.52	1.42	0.5	0.755
CSS0001124.1	CSS0001124	21.82	31.17	29.55	29.97	28.1275	12.7	11.4	8.41	9.95	10.615	23.82	18.48	16.75	16.85	18.975	9.54	8.75	14.72	6.52	9.8825	24.13	20.71	23.84	19.43	22.0275
CSS0001125.1	CSS0001125	1022.44	1097.34	1680.82	900.93	1175.38	1821.5	1271.22	1798.61	1296.92	1547.06	1062.91	1299.35	1159.81	939.62	1115.42	1984.11	1701.97	1422.34	1687.71	1699.03	1486.36	1386.72	1088.33	1533.22	1373.66
CSS0001126.1	CSS0001126	0	0	0	0.05	0.0125	0	0	0	0	0	0	0	0	0	0	0	0	0	0	0	0	0	0	0	0
CSS0001127.1	CSS0001127	0	0	0	0	0	0	0	0	0	0	0	0	0	0	0	0	0	0	0	0	0	0	0	0	0
CSS0001128.1	CSS0001128	0.3	0.08	0.29	0.22	0.2225	0.48	0.29	0.13	0.17	0.2675	0.21	0.29	0.14	0.08	0.18	0.3	0.15	0.22	0.15	0.205	0.36	0.6	0.59	0.5	0.5125
CSS0001129.1	CSS0001129	0	0	0	0	0	0	0	0	0	0	0	0	0	0	0	0	0	0	0	0	0	0	0	0	0
CSS0001130.1	CSS0001130	17.65	16.62	18.73	19.42	18.105	21.4	12.38	13.6	13.33	15.1775	17.51	12.26	16.19	17.92	15.97	14.91	17.28	15.77	13.07	15.2575	16.07	12.69	11.57	12.32	13.1625
CSS0001131.1	CSS0001131	439.82	456.47	433.61	475.55	451.363	411.24	448.73	406.04	452.54	429.637	420.26	385.27	401.24	409.83	404.15	475	452.85	508.34	411.39	461.895	411.72	390.07	393.34	391.95	396.77
CSS0001132.1	CSS0001132	34.15	30.28	35.08	31.36	32.7175	23.92	29.89	24.89	25.67	26.0925	27.3	24.6	23.47	26.7	25.5175	28.6	25.22	26.7	27.49	27.0025	31.67	32.64	31	38.66	33.4925
CSS0001133.1	CSS0001133	1	1.14	0.51	0.91	0.89	0.16	0.16	0.38	0.06	0.19	0.61	0.66	0.78	0.34	0.5975	0.26	0.29	0.32	0.29	0.29	0.52	0.77	0.44	0.41	0.535
CSS0001134.1	CSS0001134	0.47	0	0.92	0.7	0.5225	0.43	0.69	1.04	0.27	0.6075	0.23	0.23	0.22	0	0.17	0.24	0.23	0.48	0.49	0.36	0.46	0.95	0	0.21	0.405
CSS0001135.1	CSS0001135	7.98	8.05	7.04	6.53	7.4	5.38	5.42	5.71	4.16	5.1675	8.06	6.82	4.99	7.25	6.78	7.41	5.98	4.73	8.35	6.6175	7.83	8.65	7.53	8.94	8.2375
CSS0001136.1	CSS0001136	15.54	15.34	15.21	13.22	14.8275	8.25	17.13	13.91	13.04	13.0825	17.59	16.7	13.89	16.99	16.2925	11.89	11.4	12.63	24.01	14.9825	24	15.28	18.95	16.45	18.67
CSS0001137.1	CSS0001137	0	0	0	0	0	0	0	0	0.31	0.0775	0	0	0.26	0	0.065	0	0	0	0	0	0	0	0	0.26	0.065
CSS0001138.1	CSS0001138	112.73	161.24	196.82	201.9	168.173	108.28	479.02	540.84	643.43	442.892	117.87	361.98	534.97	247.51	315.582	85.93	270.3	428.36	522.97	326.89	454.87	242.83	470.28	517.84	421.455
CSS0001139.1	CSS0001139	0	0	0	0	0	0	0	0	0	0	0	0	0	0	0	0	0	0	0	0	0	0	0	0	0
CSS0001140.1	CSS0001140	0	0.46	0.38	0.27	0.2775	0.05	0.18	0.54	0.21	0.245	0	0.07	0	0.21	0.07	0	0.45	0.08	0.08	0.1525	0.22	0.08	0.23	0	0.1325
CSS0001141.1	CSS0001141	0	0	0	0	0	0	0	0	0	0	0	0	0	0	0	0	0	0	0	0	0	0	0	0	0
CSS0001142.1	CSS0001142	3.87	6.34	5.4	6.06	5.4175	3.26	6.36	4.71	2.65	4.245	5.95	3.85	4.27	5.82	4.9725	3.99	3.93	5.13	5.4	4.6125	4.91	4.39	4.12	4.46	4.47
CSS0001143.1	CSS0001143	0	0	0	0	0	0	0	0	0	0	0	0	0	0	0	0	0	0	0	0	0	0	0	0	0
CSS0001144.1	CSS0001144	0	0	0	0	0	0	0	0	0	0	0	0	0	0	0	0	0	0	0	0	0	0	0	0	0
CSS0001145.1	CSS0001145	0	0	0	0	0	0	0.24	0	0	0.06	0.37	0	0.18	1.09	0.41	0.47	0	0	0	0.1175	0	0	0	0.23	0.0575
CSS0001146.1	CSS0001146	4.6	5.48	5.25	5.03	5.09	4.66	6.2	6.47	5.48	5.7025	4.85	5.89	4.95	4.58	5.0675	6.36	6.72	6.85	4.69	6.155	6.16	6.51	5.52	5.72	5.9775
CSS0001147.1	CSS0001147	1.59	2.39	1.83	1.99	1.95	1.08	1.41	1.28	0.5	1.0675	2.24	0.56	1.1	1.75	1.4125	2.46	0.71	0.73	0.75	1.1625	0.7	1.6	2.04	1.13	1.3675
CSS0001148.1	CSS0001148	0.49	0	0.19	0	0.17	0.37	0.29	0.07	0.57	0.325	0	0.57	0.23	0.61	0.3525	0.36	0.19	0	0.4	0.2375	0.09	0.1	0.2	0.1	0.1225
CSS0001149.1	CSS0001149	5.48	5.11	4.46	3.95	4.75	2.37	1.1	1.36	1.06	1.4725	2.56	1.67	0.63	3.71	2.1425	1.84	1.3	1.34	1.79	1.5675	4.66	6.42	3.91	4.17	4.79
CSS0001150.1	CSS0001150	3.65	3.91	3.38	0	2.735	0	3.33	2.99	3.8	2.53	1.71	8.6	1.61	4.25	4.0425	10.56	0	6.89	0	4.3625	0	5.29	0	3.66	2.2375
CSS0001151.1	CSS0001151	0	0	0.37	0	0.0925	0	0	1.68	0	0.42	1.11	0	0	0	0.2775	0	0	0	0	0	0.38	0	0	1.53	0.4775
CSS0001152.1	CSS0001152	7.2	11.6	6.32	6.46	7.895	4.43	6	6.3	4.82	5.3875	5.47	9.14	4.92	4.01	5.885	2.94	4.52	4.26	10.4	5.53	6.58	6.57	14.59	6.79	8.6325
CSS0001153.1	CSS0001153	9.71	9.98	8.75	9.02	9.365	6.9	6.31	7.06	5.82	6.5225	7.57	6.71	7.14	5.17	6.6475	6.8	7.59	6.54	6.56	6.8725	6.16	7.45	7.26	8.18	7.2625
CSS0001154.1	CSS0001154	4.69	6.49	11.14	7.68	7.5	2.31	3.31	25.93	7.07	9.655	5.1	6.9	5.27	3.81	5.27	9.02	8.92	7.79	12.19	9.48	17.92	9.08	5.39	20.91	13.325
CSS0001155.1	CSS0001155	0.34	0.35	0	0.11	0.2	0	0.22	0.1	0.27	0.1475	0.22	0	0.33	0.13	0.17	0	0	0.12	0.36	0.12	0.33	0.23	0	0.22	0.195
CSS0001156.1	CSS0001156	4.04	2.9	2.15	1.24	2.5825	1.34	1.26	0.62	1.01	1.0575	0.84	1.59	0.96	0.95	1.085	1.81	0.61	1.96	0.47	1.2125	2.82	3.27	0.98	1.38	2.1125
CSS0001157.1	CSS0001157	0	0	0	0	0	0	0	0	0	0	0	0	0	0	0	0	0	0	0	0	0	0	0	0	0
CSS0001158.1	CSS0001158	0.55	0.28	0.93	0.75	0.6275	0.38	0.27	0.61	0	0.315	0.79	0.79	1.17	0.15	0.725	0.27	1.21	0.55	0.57	0.65	0.27	0.61	0.83	0.93	0.66
CSS0001159.1	CSS0001159	27.81	25.95	25.29	16.35	23.85	17.42	21.71	10.79	21.65	17.8925	21.35	23.12	22.59	23.26	22.58	20	17.62	26.16	15.96	19.935	19.5	31.2	28.84	29.45	27.2475
CSS0001160.1	CSS0001160	9.48	12.38	11.95	9.94	10.9375	9.51	10.3	13.54	8.43	10.445	12.73	13.61	16.43	15.63	14.6	12.28	13.74	13.59	20.38	14.9975	14.31	13.03	13.35	10.61	12.825
CSS0001161.1	CSS0001161	0	0	0	0	0	0	0	0	0	0	0	0	0	0	0	0	0	0	0	0	0	0	0	0	0
CSS0001162.1	CSS0001162	5.15	5.31	4.93	4.99	5.095	3.65	5.31	4.47	4.72	4.5375	4.02	4.51	3.61	5.2	4.335	5.05	4.71	4.88	3.64	4.57	4.81	3.87	5.2	4.84	4.68
CSS0001163.1	CSS0001163	0	0	0	0	0	0	0	0	0	0	0	0	0	0	0	0	0	0	0	0	0	0	0	0	0
CSS0001164.1	CSS0001164	3.46	4.51	3.43	2.55	3.4875	1.59	1.65	0.75	2.42	1.6025	1.66	1.24	1.21	1.45	1.39	0.43	2.55	1.28	0.92	1.295	2.53	6.04	2.65	1.28	3.125
CSS0001165.1	CSS0001165	4.65	5.22	3.96	4.72	4.6375	4	3.46	2.4	3.08	3.235	4.33	4.38	2.49	4.9	4.025	3.96	3.26	2.84	3.83	3.4725	3.81	5.55	3.93	4.62	4.4775
CSS0001166.1	CSS0001166	28.74	27.14	23.97	26.94	26.6975	8.29	14.61	12.84	8.71	11.1125	13.9	16.72	12.99	16.77	15.095	4.21	15.02	9.91	11.67	10.2025	17.39	17.46	25.27	22.36	20.62
CSS0001167.1	CSS0001167	15.52	19.96	14.27	11.6	15.3375	14.64	12.96	7.35	6.84	10.4475	18.11	11.96	14.19	10.48	13.685	11.4	5.97	10.41	10.32	9.525	8.85	4.72	13.37	13.95	10.2225
CSS0001168.1	CSS0001168	0.66	0.64	0.72	1.71	0.9325	1.03	0.67	0	0	0.425	0.23	1.15	1.77	0.74	0.9725	1.58	0.86	1.9	0	1.085	0.43	0.94	0.89	0.72	0.745
CSS0001169.1	CSS0001169	0	0.27	0	0.1	0.0925	0	0	0.09	0.12	0.0525	0	0	0.05	0.06	0.0275	0.19	0	0	0.19	0.095	0.1	0.2	0	0	0.075
CSS0001170.1	CSS0001170	1.33	0.88	0.68	0.94	0.9575	5.58	3.14	2	7.57	4.5725	2.22	3.05	1.74	2.15	2.29	12.85	3.73	3.85	2.04	5.6175	0.51	0.59	1.07	0.46	0.6575
CSS0001171.1	CSS0001171	0.37	0.36	0.5	0.33	0.39	0.14	0.43	0.2	0	0.1925	0.14	0.14	0	0.6	0.22	0	0.07	0	0	0.0175	0	0.11	0.1	0.14	0.0875
CSS0001172.1	CSS0001172	1.41	1.13	0.9	0.91	1.0875	0.06	0.12	0.11	0.07	0.09	0.3	0.18	0.41	0.4	0.3225	0.43	0.3	0.44	0.7	0.4675	0.59	0.43	0.43	0.36	0.4525
CSS0001173.1	CSS0001173	0	0	0.1	0.2	0.075	0	0	0	0	0	0	0	0	0	0	0.1	0	0	0	0.025	0	0.1	0	0	0.025
CSS0001174.1	CSS0001174	0.46	0.3	0.38	0.34	0.37	0.16	0.72	0.05	0.19	0.28	0.33	0.22	0.11	0.25	0.2275	0	0.22	0.23	0.42	0.2175	0.72	0.46	0.52	0.45	0.5375
CSS0001175.1	CSS0001175	0	0	0	0	0	0	0	0	0	0	0	0	0	0	0	0	0	0	0	0	0	0	0	0	0
CSS0001176.1	CSS0001176	751.3	814.52	887.66	783.4	809.22	1051.34	827.21	1242.67	918.93	1010.04	904.13	984.49	1036.54	935.81	965.242	828.92	1004	1021.06	1260.79	1028.69	927.69	856.62	879.19	1047.4	927.725
CSS0001177.1	CSS0001177	3.92	1.43	2.28	3.03	2.665	3.68	4.47	1.66	4.56	3.5925	1.49	1.75	1.04	3.61	1.9725	2.64	2.84	4.61	5.53	3.905	3.62	2.98	3.19	2.24	3.0075
CSS0001178.1	CSS0001178	0.62	0.21	0.23	0.6	0.415	0.05	0.34	0.37	0.21	0.2425	0.04	0.17	0.38	0.21	0.2	0	0.06	0.13	0.31	0.125	0.18	0.09	0.22	0.31	0.2
CSS0001179.1	CSS0001179	0	0	0	0	0	0	0	0	0	0	0	0	0	0	0	0	0	0	0	0	0	0	0	0	0
CSS0001180.1	CSS0001180	0.9	0.75	0.88	1.04	0.8925	0.82	1.08	0.58	0.58	0.765	0.24	0.31	1.07	0.57	0.5475	0.23	0.58	0.54	0.4	0.4375	1.25	1.3	1.03	0.58	1.04
CSS0001181.1	CSS0001181	9.15	7.52	6.69	3.97	6.8325	4.61	11.35	4.26	8.72	7.235	8.64	7.7	7.31	5.81	7.365	13.89	3.97	2.94	7.7	7.125	9.93	5.98	6.34	13.21	8.865
CSS0001182.1	CSS0001182	1.72	0.6	0.54	0	0.715	0	0	0.49	1.26	0.4375	0	0	1.05	0	0.2625	0.56	0	0	1.83	0.5975	2.23	1.7	0	1.14	1.2675
CSS0001183.1	CSS0001183	0	0	0	0	0	0	0	0	0	0	0	0	0	0	0	0	0	0	0	0	0	0	0	0	0
CSS0001184.1	CSS0001184	1.96	1.74	0.51	2.05	1.565	1.28	1.77	1.27	0.45	1.1925	0.38	2.06	1.49	1.71	1.41	1.43	0.51	0.79	1.21	0.985	1.51	1.31	1.31	1.64	1.4425
CSS0001185.1	CSS0001185	7.5	8.83	7.83	8.28	8.11	5.8	7.42	4.84	5.45	5.8775	7.73	6.71	6.59	9.5	7.6325	7.13	6.01	8.45	6.3	6.9725	8.44	9.49	8.88	8.42	8.8075
CSS0001186.1	CSS0001186	24.64	26.63	23.94	25.21	25.105	21.51	21.13	19.95	19.69	20.57	25.31	23.91	22.91	24.53	24.165	21.81	20.71	21.03	25.24	22.1975	26.97	24.57	23.25	23.42	24.5525
CSS0001187.1	CSS0001187	8	8.13	9.87	9.12	8.78	4.37	6.81	5	4.36	5.135	8.5	6.45	5.23	6.15	6.5825	4.28	7.13	4.92	6.38	5.6775	7.26	8.01	7.18	8.2	7.6625
CSS0001188.1	CSS0001188	24.58	31.17	19.16	17.28	23.0475	32.09	27.71	23.08	19.27	25.5375	15.78	24.17	20.55	20.98	20.37	25.2	21.46	23.2	22.53	23.0975	20.85	19.22	18.25	27.35	21.4175
CSS0001189.1	CSS0001189	25.1	23.29	23.13	26.86	24.595	24.21	28.33	22.23	18.75	23.38	23.96	22.88	22.02	26.02	23.72	23.22	21.91	26.66	21.75	23.385	20.19	23.31	21.93	22.44	21.9675
CSS0001190.1	CSS0001190	6.91	7.83	6.51	6.74	6.9975	6.83	6.04	6.05	5.59	6.1275	7.05	5.69	4.54	7.5	6.195	7.01	5.49	6.02	7.95	6.6175	6.6	8.07	6.5	6.27	6.86
CSS0001191.1	CSS0001191	9.28	12.64	9.85	11.11	10.72	2	0.69	1.67	4.56	2.23	5.22	1.52	3.01	2.14	2.9725	0.71	1.24	3.23	11.68	4.215	5.79	7.02	3.65	2.86	4.83
CSS0001192.1	CSS0001192	0.29	0.28	0.42	0.28	0.3175	0.13	0	0.25	0.17	0.1375	0.14	0.28	0	0.16	0.145	0	0	0	0	0	0	0	0.14	0	0.035
CSS0001193.1	CSS0001193	12.17	11.75	13.02	12.76	12.425	5.5	4.73	7.71	3	5.235	8.84	8.58	8.25	8.94	8.6525	2.99	6.45	5.58	9.73	6.1875	12.59	10.36	11.84	13.18	11.9925
CSS0001194.1	CSS0001194	18.8	22.73	32.82	18.17	23.13	90.06	110.62	29.05	80.07	77.45	33.68	59.35	34.76	52.29	45.02	89.63	43.86	76.91	36.78	61.795	12.22	12.98	19.07	10.56	13.7075
CSS0001195.1	CSS0001195	10.81	11.59	10.76	13.12	11.57	10.47	10.71	7.65	7.67	9.125	11.65	15.08	8.58	18.1	13.3525	7.96	10.93	10.31	9.18	9.595	11.14	11.12	13.51	8.08	10.9625
CSS0001196.1	CSS0001196	392.67	393.72	460.43	504.36	437.795	489.23	480.45	429.88	457.02	464.145	428.52	411.77	525.19	452	454.37	334.22	316.5	386.9	377.25	353.717	287.5	324.11	399.54	493.51	376.165
CSS0001197.1	CSS0001197	9.84	8.96	10.34	8.5	9.41	9.1	4.88	8.6	4.72	6.825	4.87	6.58	4.2	6.6	5.5625	8.31	7.92	8.63	12.24	9.275	8.68	7.17	11.79	8.2	8.96
CSS0001198.1	CSS0001198	0	0	0	0	0	0	0	0	0	0	0	0	0	0	0	0	0	0	0	0	0	0	0	0	0
CSS0001199.1	CSS0001199	0.43	0	0	0	0.1075	0	0	0	0	0	1.24	0	0	0	0.31	0.43	0	0.43	0.46	0.33	0	0	0	0	0
CSS0001200.1	CSS0001200	15.51	16.44	18.39	16.07	16.6025	15.77	15.36	13.33	14.39	14.7125	18.4	16.57	20.75	24.68	20.1	13.88	13.54	14.74	20.28	15.61	20.79	21.69	19.69	20.53	20.675
CSS0001201.1	CSS0001201	20.79	21.29	17.44	17.17	19.1725	14.88	15.66	10.75	11.54	13.2075	13.34	18.84	17.77	19.91	17.465	15.79	15.39	11.82	13.03	14.0075	16.06	18.65	16.18	14.61	16.375
CSS0001202.1	CSS0001202	0.17	0.34	0.16	0.16	0.2075	0	0	0	0.19	0.0475	0.16	0	0	0	0.04	0.17	0	0.67	0.17	0.2525	0.16	0.5	0	0.16	0.205
CSS0001203.1	CSS0001203	0.22	0.31	0.29	0.15	0.2425	0.42	0.22	0.07	0.09	0.2	0.07	0.14	0.22	0.08	0.1275	0.15	0.07	0.15	0.31	0.17	0	0.08	0.07	0	0.0375
CSS0001204.1	CSS0001204	0	0	0	0	0	0	0	0	0	0	0	0	0	0	0	0	0	0	0	0	0	0	0	0	0
CSS0001205.1	CSS0001205	0	0	0	0	0	0	0	0	0	0	0	0	0	0	0	0	0	0	0	0	0	0	0	0	0
CSS0001206.1	CSS0001206	1.25	0.85	0.89	1.03	1.005	0.41	0.56	0.22	0.11	0.325	0.64	0.37	0.45	0.41	0.4675	0.67	0.37	0.38	0.3	0.43	0.28	0.19	0.67	0.09	0.3075
CSS0001207.1	CSS0001207	1.83	0.64	0	1.8	1.0675	2.24	1.16	2.09	2.01	1.875	1.16	0	0.56	1.38	0.775	1.81	0	1.79	0	0.9	0	0	1.26	0	0.315
CSS0001208.1	CSS0001208	4.7	4.38	3.38	3.33	3.9475	3.33	4.38	3.52	2.94	3.5425	5.3	3.83	3.72	4.49	4.335	2.41	3.5	4.44	4.64	3.7475	3.92	4.93	2.93	4	3.945
CSS0001209.1	CSS0001209	0	0	0	0.16	0.04	0	0	0	0	0	0	0	0	0	0	0	0	0	0	0	0	0	0	0	0
CSS0001210.1	CSS0001210	21.91	18.7	18.87	20.41	19.9725	18.06	20.66	16.22	14.41	17.3375	21.9	19.22	17.33	18.06	19.1275	19.88	18.57	19.42	19.69	19.39	22.78	23.95	22.43	22.52	22.92
CSS0001211.1	CSS0001211	9.31	9.95	9.62	9.32	9.55	7.93	9.08	8.91	7.2	8.28	7.47	6.29	8.38	10.68	8.205	9.33	9.39	8.59	7.38	8.6725	11.44	9.07	8.86	9.12	9.6225
CSS0001212.1	CSS0001212	0	0	0	0	0	0	0	0	0	0	0	0	0	0	0	0	0	0	0	0	0	0	0	0	0
CSS0001213.1	CSS0001213	4.22	1.48	6	4.82	4.13	4.49	3.97	8.97	3.07	5.125	3.34	8.02	4.49	8.75	6.15	4.15	4.82	3.43	3.02	3.855	4.8	6.25	13.78	5.6	7.6075
CSS0001214.1	CSS0001214	0.25	0.26	0.62	0.25	0.345	0.71	1.37	0.45	1.32	0.9625	0.25	0.12	0.12	0.7	0.2975	0.64	0.13	0.52	1.19	0.62	0.74	1.54	1.02	0.74	1.01
CSS0001215.1	CSS0001215	4.81	3.61	4.7	4.52	4.41	2	1.58	3.08	1.59	2.0625	4.34	2.66	3.17	4.12	3.5725	2.12	2.26	1.78	5.88	3.01	5.87	5.38	5.14	7.12	5.8775
CSS0001216.1	CSS0001216	38.96	45.16	33.38	33.64	37.785	35.95	31.79	27.74	27.16	30.66	71.79	53.6	48.12	61.53	58.76	33.87	31.06	31.07	34.15	32.5375	41.23	32.51	35.23	30.18	34.7875
CSS0001217.1	CSS0001217	0	0.15	0	0	0.0375	0	0	0.13	0	0.0325	0	0	0	0	0	0	0	0	0	0	0.29	0	0	0	0.0725
CSS0001218.1	CSS0001218	0.73	0.43	0.61	1.07	0.71	0.53	0.14	0.31	0.11	0.2725	0.59	1.07	0.22	1.19	0.7675	0.55	0.47	0.11	1.38	0.6275	0.12	0.39	0.35	0.43	0.3225
CSS0001219.1	CSS0001219	39.79	23.03	19.51	40.96	30.8225	30.71	20.04	23.37	12.75	21.7175	25.4	29.35	26.31	25.58	26.66	18.21	29.56	22.75	9.57	20.0225	17.39	22.37	25.46	23.91	22.2825
CSS0001220.1	CSS0001220	0	0	0	0	0	0	0	0	0	0	0	0	0	0	0	0	0	0	0	0	0	0	0	0	0
CSS0001221.1	CSS0001221	7.47	7.18	5.38	7.44	6.8675	7.78	6.96	2.72	7.2	6.165	4.9	5.98	5.07	6.16	5.5275	6.94	3.84	4.78	4.41	4.9925	5.69	6.14	5.44	4.82	5.5225
CSS0001222.1	CSS0001222	24.75	22.19	17.61	24.88	22.3575	31	22.57	20.51	37.97	28.0125	17.69	21.35	21.23	20.42	20.1725	34.68	25.17	27.61	13.83	25.3225	13.91	19.59	16.37	17.1	16.7425
CSS0001223.1	CSS0001223	15.76	15.17	16.55	19.9	16.845	13.99	17.23	15.25	13.03	14.875	11.39	13.68	13.78	18.2	14.2625	13.96	14.7	14.36	13.79	14.2025	17.46	17.55	15.85	17.86	17.18
CSS0001224.1	CSS0001224	0	0	0	0	0	0	0	0	0	0	0	0	0	0	0	0	0	0	0	0	0	0	0	0	0
CSS0001225.1	CSS0001225	0	0	0.11	0	0.0275	0	0	0.73	0	0.1825	0.11	0	0	0.13	0.06	0	0	0	0	0	0.11	0	0	0	0.0275
CSS0001226.1	CSS0001226	0	2.79	2.17	1.8	1.69	1.71	2.12	3.73	1.54	2.275	4.68	5.02	0	8.1	4.45	0	0.78	0	1.07	0.4625	1.61	7.99	10.67	0.9	5.2925
CSS0001227.1	CSS0001227	14.58	5.86	4.27	10.44	8.7875	2.06	4.25	5.29	3.09	3.6725	3.2	1.07	2.06	3.78	2.5275	2.77	1.1	5.5	1.2	2.6425	5.46	8.34	6.91	9.46	7.5425
CSS0001228.1	CSS0001228	2.45	2.88	2.51	1.96	2.45	1.89	2.33	2.12	2.2	2.135	2.43	1.96	3.26	3.35	2.75	2.65	3.22	2.36	2.5	2.6825	3.34	2.74	2.87	2.65	2.9
CSS0001229.1	CSS0001229	0	0	0	0	0	0	0	0	0	0	0	0	0	0	0	0	0	0	0	0	0	0	0	0	0
CSS0001230.1	CSS0001230	10.61	7.96	9.1	8.08	8.9375	7.47	5.77	7.44	5.96	6.66	7.42	10.14	7.42	8.46	8.36	7.26	6.6	7.9	7.6	7.34	7	7.32	8.64	8.73	7.9225
CSS0001231.1	CSS0001231	0	0	0.11	0	0.0275	0	0.1	0	0.03	0.0325	0	0	0	0	0	0	0	0	0	0	0	0	0	0.08	0.02
CSS0001232.1	CSS0001232	391.75	372.27	296.43	381.15	360.4	304.11	311.13	322.39	298.47	309.025	345.99	280.33	294.87	301.56	305.688	300.41	353.4	350.95	280.82	321.395	271.77	302.32	320.81	280.47	293.842
CSS0001233.1	CSS0001233	10.03	11.5	11.04	9.96	10.6325	7.41	8.29	9.38	6.1	7.795	9.33	9.32	8.14	9.44	9.0575	9.7	10.62	7.99	10.48	9.6975	13.73	14.54	12.49	12.83	13.3975
CSS0001234.1	CSS0001234	0	0	0	0	0	0	0	0	0	0	0	0	0	0	0	0	0	0	0	0	0	0	0	0	0
CSS0001235.1	CSS0001235	0.41	1.56	0.54	0.68	0.7975	0.13	0.4	0.49	0.16	0.295	0.13	0.66	0.79	0.45	0.5075	0	0	0	0.57	0.1425	1.47	0.69	0	0.27	0.6075
CSS0001236.1	CSS0001236	17.63	15.65	11.08	14.61	14.7425	15.64	18.41	12.83	13.69	15.1425	12.44	11.64	12.87	14.15	12.775	15.99	17.52	9.71	10.04	13.315	14.38	16.27	13.63	11.92	14.05
CSS0001237.1	CSS0001237	0	0	0	0	0	0	0	0	0	0	0	0	0	0	0	0	0	0	0	0	0	0	0	0	0
CSS0001238.1	CSS0001238	0	0	0	0	0	0	0	0.09	0	0.0225	0	0	0.09	0	0.0225	0	0	0	0	0	0	0	0	0	0
CSS0001239.1	CSS0001239	0	0	0	0	0	0	0	0	0	0	0	0	0	0	0	0	0	0	0	0	0	0	0	0	0
CSS0001240.1	CSS0001240	0	0	0	0	0	0	0	0	0	0	0	0	0	0	0	0	0	0	0	0	0	0	0	0	0
CSS0001241.1	CSS0001241	23.07	24.22	33.69	25.27	26.5625	25.99	24.56	33.19	22.51	26.5625	28.28	29.73	27.18	33.45	29.66	21.83	25.02	26.15	51.64	31.16	35.84	30.91	30.25	39.06	34.015
CSS0001242.1	CSS0001242	3.71	3.5	6.16	5.3	4.6675	2.49	3.89	0.59	2.66	2.4075	4.53	2.59	2.21	3	3.0825	3.35	2.98	1.68	1.78	2.4475	1.64	2.7	5.48	3.65	3.3675
CSS0001243.1	CSS0001243	0	0	0	0	0	0	0	0	25.17	6.2925	0	0	0	0	0	0	0	0	0	0	0	0	0	0	0
CSS0001244.1	CSS0001244	1.62	1.71	1.42	1.99	1.685	1.78	2	1.55	2.37	1.925	3.17	2.76	1.67	3.72	2.83	2.76	1.24	2.08	3.31	2.3475	2.07	2.63	2.2	2.12	2.255
CSS0001245.1	CSS0001245	5.92	22.53	6.3	10.85	11.4	52.64	38.25	15.7	27.39	33.495	7.72	22.48	17.51	56.96	26.1675	47.2	26.06	36.69	7.95	29.475	5.05	7.3	22.15	7.37	10.4675
CSS0001246.1	CSS0001246	133.26	135.09	123.3	108.89	125.135	118.18	95	71.59	75.6	90.0925	84.14	102.98	66.34	96.85	87.5775	201.4	116.57	82.52	84.96	121.362	93.75	94.73	63.87	71.26	80.9025
CSS0001247.1	CSS0001247	2.04	1.74	0.94	0.72	1.36	0.33	0.7	0.31	0.81	0.5375	0.35	0	0	0	0.0875	1.07	0.35	0.72	1.04	0.795	1.85	0	0	0.71	0.64
CSS0001248.1	CSS0001248	120.68	88.22	75.66	67.73	88.0725	17.48	9.35	21.91	3.82	13.14	21.49	13.07	7.55	9.52	12.9075	13.06	35.13	15.75	5.2	17.285	45.02	54.63	36.2	62.82	49.6675
CSS0001249.1	CSS0001249	4.18	1.88	2.27	4.1	3.1075	5.47	2.83	3.58	3.29	3.7925	3.41	1.71	7.13	9.42	5.4175	3.53	0.59	1.17	1.92	1.8025	2.33	1.18	1.84	3.56	2.2275
CSS0001250.1	CSS0001250	0.04	0.18	0	0	0.055	0	0	0	0	0	0.5	0	0	0	0.125	0	0	0	0.09	0.0225	0.08	0	0.21	0	0.0725
CSS0001251.1	CSS0001251	0	0	0	0	0	0	0	0	0	0	0	0	0	0	0	0	0	0	0	0	0	0	0	0	0
CSS0001252.1	CSS0001252	0	0	0	0	0	0	0	0	0	0	0	0	0	0	0	0	0	0	0	0	0	0	0	0	0
CSS0001253.1	CSS0001253	0	0.06	0.06	0	0.03	0	0.09	0.05	0.62	0.19	0.07	0.07	0	0.15	0.0725	0	0.08	0.23	0.08	0.0975	0	0	0	0	0
CSS0001254.1	CSS0001254	0	0	0	0	0	0	0	0	0	0	0	0	0	0	0	0	0	0	0	0	0	0	0	0	0
CSS0001255.1	CSS0001255	436	350.79	279.81	385.15	362.938	206.28	216.01	182.11	134.29	184.672	283.76	354.25	192.51	288.23	279.688	168.54	223.78	173.5	144.7	177.63	269.52	302.89	282.68	256.64	277.933
CSS0001256.1	CSS0001256	248.61	237.05	338.6	252.82	269.27	298.67	273.41	408.62	290.18	317.72	305.52	265.1	314.69	272.41	289.43	269.87	333.13	333.53	448.89	346.355	311.47	264.97	307.16	333.72	304.33
CSS0001257.1	CSS0001257	14.51	15.33	14.7	14.27	14.7025	20.55	13	13.89	15.57	15.7525	13.31	13.73	12.56	13.85	13.3625	20.65	21.4	18.51	16.07	19.1575	18.34	18.87	13.9	15.72	16.7075
CSS0001258.1	CSS0001258	1.98	0.42	1.07	2.35	1.455	13.41	7.57	3.41	23.28	11.9175	2.26	3.65	3.49	2.96	3.09	26.29	15.8	15.32	1.92	14.8325	0.9	0.48	0.66	0	0.51
CSS0001259.1	CSS0001259	0	0	0	0	0	0	0	0	0	0	0	0	0	0	0	0	0	0	0	0	0	0	0	0	0
CSS0001260.1	CSS0001260	0	0	0	0	0	0	0	0	0	0	0	0	0	0	0	0	0	0	0	0	0	0	0	0	0
CSS0001261.1	CSS0001261	46.69	46.25	56.66	45.55	48.7875	78.72	51.13	96.68	54.93	70.365	40.87	48.84	40.65	32.95	40.8275	71.17	82.42	80.86	41.52	68.9925	30.98	37.32	29.35	38.21	33.965
CSS0001262.1	CSS0001262	8.62	9.41	4.95	26.81	12.4475	20.11	0	14.15	12.34	11.65	11.85	12.5	9.7	25.52	14.8925	15.47	3.41	19.14	27.48	16.375	14	8.66	2	11.03	8.9225
CSS0001263.1	CSS0001263	0	0	0	0	0	0	0	0	0	0	0	0	0	0	0	0	0	0	0	0	0	0	0	0	0
CSS0001264.1	CSS0001264	3.78	6.67	7.38	7.99	6.455	5.04	12.87	14.4	16.11	12.105	6.02	11.73	13.72	11.99	10.865	7.57	11.52	12.53	14.31	11.4825	13.65	8.78	15.04	14.64	13.0275
CSS0001265.1	CSS0001265	1.32	0.88	1.2	0.61	1.0025	1.21	0.62	0.53	0.58	0.735	1.21	1.39	0.71	1.06	1.0925	1.07	0.81	0.65	1.11	0.91	0.98	0.9	1.23	1.28	1.0975
CSS0001266.1	CSS0001266	0.41	0.21	0.4	0.2	0.305	0	0.4	0	0.24	0.16	0	0.4	0	0.46	0.215	0	0.2	0.62	0.22	0.26	0	0	0	0	0
CSS0001267.1	CSS0001267	0	0	0	0	0	0	0	0	0	0	0	0	0	0	0	0	0	0	0	0	0	0	0	0	0
CSS0001268.1	CSS0001268	0	0	0	0	0	0	0	0	0	0	0	0	0	0	0	0	0	0	0	0	0	0	0	0	0
CSS0001269.1	CSS0001269	0	0	0	0	0	0	0	0	0	0	0	0	0	0	0	0	0	0	0	0	0	0	0	0	0
CSS0001270.1	CSS0001270	0	0	0	0.13	0.0325	0	0	0	0	0	0	0	0	0	0	0	0.27	0	0	0.0675	0	0	0	0	0
CSS0001271.1	CSS0001271	0.62	0.91	0.7	1.08	0.8275	0.39	0.91	0.64	0.87	0.7025	0.65	0.48	0.26	1.84	0.8075	0.78	0.11	0.91	0.74	0.635	0.31	0.54	0.55	0.78	0.545
CSS0001272.1	CSS0001272	91.78	83.9	92.68	97.41	91.4425	182.72	163.38	107.15	166.03	154.82	128.58	117.67	114.77	121.77	120.697	176.67	149.5	131.46	98.57	139.05	74.09	79.43	78.71	80.54	78.1925
CSS0001273.1	CSS0001273	0	0	0	0	0	0	0	0	0	0	0	0	0	0	0	0	0	0	0	0	0	0	0	0	0
CSS0001274.1	CSS0001274	22.25	22.59	22.34	23.88	22.765	16.62	19.28	15.36	15.66	16.73	19.42	18.11	18.72	18.67	18.73	16.94	16.76	15.06	16.72	16.37	17.6	17.43	22.92	21.63	19.895
CSS0001275.1	CSS0001275	0	0	0	0	0	0	0	0	0	0	0	0	0	0	0	0	0	0	0	0	0	0	0	0	0
CSS0001276.1	CSS0001276	3.28	3.59	0	6.2	3.2675	2.91	0	5.15	0	2.015	6.08	0	2.78	0	2.215	3.09	0	14.92	0	4.5025	3.21	0	10.64	3.3	4.2875
CSS0001277.1	CSS0001277	18.32	18.88	19.08	18.9	18.795	12.98	16.76	12.69	10.81	13.31	12.25	12.04	12.95	14.02	12.815	13.61	13.14	12.73	12.68	13.04	16.69	16.8	16	15.45	16.235
CSS0001278.1	CSS0001278	3.11	5.4	4.44	3.55	4.125	4.75	4.92	4.01	1.15	3.7075	3.45	7.4	4.77	2.32	4.485	3.07	6.09	4.07	8.27	5.375	4.03	6.17	6.36	6.67	5.8075
CSS0001279.1	CSS0001279	0.37	1.06	1.08	0.28	0.6975	3.14	2.01	1.22	4.33	2.675	0.54	1.12	0.54	1.74	0.985	4.3	2.94	2.44	0.29	2.4925	0.63	0.28	0.3	0.45	0.415
CSS0001280.1	CSS0001280	45.08	75.62	70.77	113.41	76.22	29.22	76.46	48.9	32.73	46.8275	45.71	65.33	59.68	63.36	58.52	15.56	71.18	56.51	59.27	50.63	92.24	69.93	79.07	41.21	70.6125
CSS0001281.1	CSS0001281	56.9	69.32	47.2	72.78	61.55	52.63	74.35	64.01	92.2	70.7975	95.17	109.74	130.76	133.98	117.412	29.54	48.42	73.72	85.48	59.29	53.32	37.71	82.2	62.3	58.8825
CSS0001282.1	CSS0001282	2.16	1.11	1.47	1.7	1.61	1.11	0	1.15	1.12	0.845	0.52	1.04	1.03	2.24	1.2075	0.32	0.96	0.98	1.23	0.8725	1.25	1.2	0.76	0.73	0.985
CSS0001283.1	CSS0001283	0	0	0	0	0	0	0	0	0	0	0	0	0	0	0	0	0	0	0	0	0	0	0	0	0
CSS0001284.1	CSS0001284	0.11	0.06	0.22	0.06	0.1125	0.04	0	0.03	0.07	0.035	0.03	0	0	0.03	0.015	0.06	0.03	0	0	0.0225	0	0.03	0.06	0.05	0.035
CSS0001285.1	CSS0001285	0.11	0	0	0	0.0275	0.03	0	0.03	0	0.015	0	0.04	0	0.08	0.03	0	0.04	0	0	0.01	0.12	0	0	0.04	0.04
CSS0001286.1	CSS0001286	0	0	0	0	0	0	0	0	0	0	0	0	0	0	0	0	0	0	56.16	14.04	0	0	0	0	0
CSS0001287.1	CSS0001287	4.83	5.85	4.91	5.47	5.265	7.4	7.28	4.01	8.56	6.8125	7.41	6.62	4.1	6.97	6.275	15.62	8.17	7.21	4.43	8.8575	3.44	4.6	3.79	3.82	3.9125
CSS0001288.1	CSS0001288	104.85	20.94	68.12	0	48.4775	76.11	8.31	0	46.04	32.615	26.43	53.58	16.04	34.44	32.6225	17.9	9.14	17.26	0	11.075	9.31	26.77	10.37	38.32	21.1925
CSS0001289.1	CSS0001289	12.97	31	16.09	9.07	17.2825	62.18	14.92	19.68	27.83	31.1525	58.99	79.63	47.58	79.54	66.435	32.77	19.88	29.9	13.54	24.0225	9.99	14.8	16.69	9.33	12.7025
CSS0001290.1	CSS0001290	0.35	0.36	0.86	0.35	0.48	0.66	0.51	0	0.41	0.395	0.17	0	0.34	0.19	0.175	0.53	0.35	0.36	0.18	0.355	1.03	0.36	0.89	0.69	0.7425
CSS0001291.1	CSS0001291	104.04	144.23	130.19	155.37	133.457	125.04	269.2	247.38	311.95	238.392	168.93	216.12	268.87	251.99	226.478	151.81	198.19	241.85	243.81	208.915	270.02	193.58	282.62	216.15	240.593
CSS0001292.1	CSS0001292	0	0	0	0	0	0	0	0	0	0	0	0	0.61	0	0.1525	0	0	0	0	0	0	0	0	0	0
CSS0001293.1	CSS0001293	0	0	0	0	0	0	0	0	0.31	0.0775	0	0.26	0	0.6	0.215	0	0	0	0	0	0	0	0	0	0
CSS0001294.1	CSS0001294	43.45	49.22	32.63	37.21	40.6275	25.48	38.24	32.8	34.71	32.8075	37.06	38.27	39.93	37.07	38.0825	28.69	42.67	39.6	30.72	35.42	27.34	34.81	27.82	27.79	29.44
CSS0001295.1	CSS0001295	0	0	0	0	0	0	0	0	0	0	0	0	0	0	0	0	0	0	0	0	4.36	0	0	0	1.09
CSS0001296.1	CSS0001296	0.13	0.13	0.25	0.09	0.15	0.12	0.25	0.08	0	0.1125	0.08	0.17	0.12	0.24	0.1525	0.17	0.13	0.13	0.63	0.265	0.13	0.26	0.13	0.25	0.1925
CSS0001297.1	CSS0001297	13.92	15.77	21.98	9.71	15.345	12.07	7.15	8.34	4.5	8.015	12.58	8.4	8.09	6.74	8.9525	9.59	8.86	7.81	19.33	11.3975	6.81	3.66	5.37	5.19	5.2575
CSS0001298.1	CSS0001298	25.87	25.81	24.24	22.97	24.7225	21.98	21.48	19.53	17	19.9975	24.4	22.71	23.28	24.58	23.7425	20.41	19.27	19.93	21.56	20.2925	22.93	24.86	20.88	23.99	23.165
CSS0001299.1	CSS0001299	0	0	0	0.25	0.0625	0	0	0	0	0	0	0.25	0	0.29	0.135	0	0.25	0	0	0.0625	0	0	0.52	0	0.13
CSS0001300.1	CSS0001300	508.98	470.64	442.15	427.92	462.423	576.27	556.37	577.85	837.83	637.08	567.86	560.46	561.07	528.4	554.448	1114.34	829.52	871.32	535.58	837.69	630.94	585.05	509.09	503.74	557.205
CSS0001301.1	CSS0001301	8.57	9.33	5.82	9.32	8.26	6.88	7.3	6.99	4.73	6.475	7.81	7.22	6.76	5.77	6.89	5.89	4.91	5.35	6.41	5.64	6.36	4.32	6.79	5.89	5.84
CSS0001302.1	CSS0001302	4.36	2.76	12.33	6.81	6.565	4.76	0	4.41	4.71	3.47	4.95	4.96	3.94	2.98	4.2075	5.97	3.41	10.12	2.82	5.58	5.11	0.86	6.32	9.57	5.465
CSS0001303.1	CSS0001303	14.01	14.17	12.01	10.88	12.7675	11.07	9.48	8.9	7.32	9.1925	9.37	11.21	10.21	10.6	10.3475	10.56	10.84	10.65	10.07	10.53	11.75	10.32	10.36	12.22	11.1625
CSS0001304.1	CSS0001304	2.6	2.55	2.31	2.16	2.405	0.11	0.11	0.05	0	0.0675	0	0.11	0.22	0.06	0.0975	0.06	0.28	0.41	0.54	0.3225	6.47	12.62	6.93	6.2	8.055
CSS0001305.1	CSS0001305	0.13	1.24	1.56	0.33	0.815	0.06	0.13	0	0	0.0475	0.06	0	0.19	0.07	0.08	0.07	0	0	0	0.0175	0.78	0.95	1.28	0.72	0.9325
CSS0001306.1	CSS0001306	0.28	0.33	0.22	0.5	0.3325	0.13	0.14	0.21	0.27	0.1875	0.18	0.36	0.13	0.1	0.1925	0	0.14	0.09	0	0.0575	0.22	0.05	0.23	0.22	0.18
CSS0001307.1	CSS0001307	3.86	3.8	7.49	4.84	4.9975	6.04	5.46	3.41	1.81	4.18	8.13	4.57	4	3.08	4.945	5.26	3.98	4.07	4.21	4.38	5.27	3.36	4.42	5.82	4.7175
CSS0001308.1	CSS0001308	1.67	1.15	1.08	0.44	1.085	0.42	0.33	1.09	0.13	0.4925	0.86	2.26	1.49	1.22	1.4575	0.67	0.88	1.35	3.36	1.565	3.23	1.01	2.01	1.51	1.94
CSS0001309.1	CSS0001309	0	0	0	0	0	0	0.22	0	0	0.055	0	0.65	0	0	0.1625	0.23	0	0	0	0.0575	0.22	0.23	0	0	0.1125
CSS0001310.1	CSS0001310	0	0	0	0	0	0	0	0	0	0	0	0	0	0	0	0	0	0	0	0	0	0	0	0	0
CSS0001311.1	CSS0001311	0	0	0	0	0	0	0	0	0	0	0	0	0	0	0	0.1	0	0	0	0.025	0	0	0	0	0
CSS0001312.1	CSS0001312	0	0	0	0	0	0	0	0	0	0	0	0	0	0	0	0	0	0	0	0	0	0	0	0	0
CSS0001313.1	CSS0001313	0	0	0	0	0	0	0	0	0	0	0	0	0.08	0	0.02	0	0	0	0	0	0	0.09	0	0	0.0225
CSS0001314.1	CSS0001314	0.32	0.21	0.1	0.2	0.2075	0.08	0.12	0.07	0.23	0.125	0.55	0.59	0.39	0.44	0.4925	0.05	0.05	0.46	0	0.14	0.22	0.15	0.05	0.37	0.1975
CSS0001315.1	CSS0001315	0	0	0	0	0	0	0	0	0	0	0	0	0	0	0	0	0	0	0	0	0	0	0	0	0
CSS0001316.1	CSS0001316	0	1.2	0	0.56	0.44	0	0	0.49	0	0.1225	0	0	0	0.64	0.16	0	0	0	0	0	0	0	0	0	0
CSS0001317.1	CSS0001317	0	0	0	0	0	0	0	0	0.82	0.205	0	0	0	0	0	0	0	0	0	0	0	0	0	0	0
CSS0001318.1	CSS0001318	0	0	0	0	0	0	0	0	0	0	0	0	0	0	0	0	0	0	0	0	0	0	0	0	0
CSS0001319.1	CSS0001319	41.18	47.28	40.78	38.27	41.8775	15.13	12.48	23.46	9.36	15.1075	23.38	21.68	21.23	21.63	21.98	13.22	19.56	15.87	25.9	18.6375	42.17	44.4	30.61	36.9	38.52
CSS0001320.1	CSS0001320	3.55	4.19	4.5	3.07	3.8275	4.36	3.89	4.03	3.51	3.9475	4.82	4.96	3.65	5.13	4.64	4.74	4.36	3.87	6.06	4.7575	5.39	4.96	4.32	5.21	4.97
CSS0001321.1	CSS0001321	13.08	10.79	8.28	12.35	11.125	3.73	1.86	1.69	0.8	2.02	6.89	3.19	2.15	0.19	3.105	2.27	2.58	1.05	0	1.475	4.56	5.79	5.97	4.08	5.1
CSS0001322.1	CSS0001322	98.89	87.35	79	86.37	87.9025	54.75	72.87	63.59	69.3	65.1275	58.4	63.45	65.83	61.28	62.24	64.51	77.55	77.48	50.03	67.3925	74.39	80.82	75.21	69.99	75.1025
CSS0001323.1	CSS0001323	5.15	4.91	5.11	4.31	4.87	3.16	4.03	3.1	2.84	3.2825	4.2	2.67	2.39	3.93	3.2975	2.58	2.31	3.72	2.66	2.8175	3.62	4.98	5.55	5.54	4.9225
CSS0001324.1	CSS0001324	2.78	0	0.87	0	0.9125	0	0	0	0	0	0	0	0	0	0	0	0	0	0	0	0	0	0	0	0
CSS0001325.1	CSS0001325	0	0	25.62	80.54	26.54	0	25.12	0	0	6.28	53.57	27.33	0	0	20.225	0	0	0	0	0	0	54.15	0	0	13.5375
CSS0001326.1	CSS0001326	12.16	12.14	11	8.57	10.9675	6.76	7.16	6.66	6.4	6.745	6.76	7.08	10.65	7.15	7.91	9.85	7.9	6.03	7.24	7.755	11.58	11.06	9.24	8.44	10.08
CSS0001327.1	CSS0001327	7.22	2.83	3.37	4.65	4.5175	2.54	3.13	3.49	2.83	2.9975	2.87	5.74	3.52	3.85	3.995	1.99	2.69	1.75	2.87	2.325	3.38	7.25	5.54	7.8	5.9925
CSS0001328.1	CSS0001328	16.42	16.81	13.57	15.3	15.525	12.53	17.12	13.11	14.36	14.28	12.17	11.09	10.76	13.23	11.8125	16.25	18.89	15.2	12.96	15.825	19.56	18.67	18.28	17.72	18.5575
CSS0001329.1	CSS0001329	0	0	0	0	0	0	0	0	0	0	0	0	0	0	0	0	0	0	0	0	0	0	0	0	0
CSS0001330.1	CSS0001330	0	4.78	0	0	1.195	2	0	0	0	0.5	0	0	0	2.61	0.6525	0	0	0	0	0	0	0	0	4.47	1.1175
CSS0001331.1	CSS0001331	0	0	0	0	0	0	0	0	0	0	0	0	0	0	0	0	0	0	0	0	0	0	0	0	0
CSS0001332.1	CSS0001332	0.43	0	0	0.43	0.215	0	0.26	0	0	0.065	1.24	0	0.8	0	0.51	0	0	0	0	0	0	0	0	0	0
CSS0001333.1	CSS0001333	0.06	0.13	0.25	0.13	0.1425	0	0.13	0.23	0	0.09	0.06	0.06	0.31	0.07	0.125	0	0.32	0.13	0.07	0.13	0	0	0.13	0.06	0.0475
CSS0001334.1	CSS0001334	2.51	1.96	1.17	1.78	1.855	1.69	1.86	0.8	2.44	1.6975	1.85	2.04	2.69	2.85	2.3575	1.51	2.08	1.42	1.67	1.67	0.78	2.53	1.41	0.97	1.4225
CSS0001335.1	CSS0001335	0.49	0.17	0.71	1.15	0.63	0.64	0	0.59	0.37	0.4	1.28	0.96	0.52	1.35	1.0275	0.36	0.36	1.28	0.81	0.7025	0.46	0.99	0.48	0.34	0.5675
CSS0001336.1	CSS0001336	1.97	3.76	2.44	1.53	2.425	2.15	2.77	1.94	1.43	2.0725	0.95	2.55	1.97	1.98	1.8625	1.31	2.08	0.95	3.13	1.8675	3.2	2.97	4.7	3.25	3.53
CSS0001337.1	CSS0001337	2.4	2.06	2.85	2.49	2.45	0.87	1.04	2.83	1.38	1.53	3.48	1.93	3.31	1.9	2.655	1.34	2.1	2.29	5.28	2.7525	2.58	2.42	4.02	2.98	3
CSS0001338.1	CSS0001338	0	0	0	0	0	0	0	0	0	0	0	0	0	0	0	0	0	0	0	0	0	0	0	0	0
CSS0001339.1	CSS0001339	2.26	2.23	1.49	1.44	1.855	0.71	1.03	0.64	0.8	0.795	0.53	0.4	0.74	1.56	0.8075	0.59	0.7	0.24	0.87	0.6	1.04	0.53	1.17	1.19	0.9825
CSS0001340.1	CSS0001340	0	2.38	5.27	1.1	2.1875	3.06	6.26	0	1.2	2.63	1.06	3.19	0	1.29	1.385	0	1.1	5.39	2.44	2.2325	6.59	1.1	1.17	6.75	3.9025
CSS0001341.1	CSS0001341	6.85	7.39	6.65	6.86	6.9375	4.47	5.96	6.54	4.03	5.25	7.61	7.02	5.39	8.65	7.1675	5.9	5.55	5.79	8.42	6.415	6.09	7.5	8.02	5.8	6.8525
CSS0001342.2	CSS0001342	25.32	15.36	14.91	23.67	19.815	29.76	42.59	16.56	24.33	28.31	37.96	33.36	35.3	40.84	36.865	21.36	17.58	36.89	33.18	27.2525	15.13	24.3	21.31	16.99	19.4325
CSS0001343.1	CSS0001343	0.49	0.61	0.8	0.7	0.65	0.78	0.81	0.74	0.72	0.7625	0.83	0.66	0.7	0.54	0.6825	0.58	0.49	0.42	0.32	0.4525	0.72	0.65	0.34	0.57	0.57
CSS0001344.1	CSS0001344	0	0	0	0.03	0.0075	0	0	0	5.41	1.3525	0	0.91	0	4.44	1.3375	0	0	0	0	0	0	1.65	0	0	0.4125
CSS0001345.1	CSS0001345	0.46	0.3	0.38	0.34	0.37	0.16	0.72	0.05	0.19	0.28	0.33	0.22	0.11	0.25	0.2275	0	0.22	0.23	0.42	0.2175	0.72	0.46	0.52	0.45	0.5375
CSS0001346.1	CSS0001346	0	0	0	0	0	0	0	0	0	0	0	0	0	0	0	0	0	0	0	0	0	0	0	0	0
CSS0001347.1	CSS0001347	7.32	6.64	6.56	6.25	6.6925	3.6	4.22	3.36	4.25	3.8575	5.48	5.27	4.46	5.34	5.1375	5.95	4.71	4.81	4.47	4.985	6.15	5.74	5.93	5.18	5.75
CSS0001348.1	CSS0001348	11460.6	10410.8	9733.89	12782	11096.8	4720.91	4992.43	5725.21	3590.77	4757.33	7262.69	7273.92	6105.01	6238.17	6719.95	3638.52	4251.49	4218.78	4264.14	4093.23	6453.73	8630.81	8707.45	8050.21	7960.55
CSS0001349.1	CSS0001349	0	0	0	0	0	0	0	0	0	0	0	0	0	0	0	0	0	0	0	0	0	0	0	0	0
CSS0001350.1	CSS0001350	9.2	9.75	13.11	8.71	10.1925	5.12	3.06	7.83	1.58	4.3975	8.28	6.56	5.72	4.44	6.25	4.91	5.41	5.82	12.58	7.18	13.1	10.08	10.08	10.15	10.8525
CSS0001351.1	CSS0001351	13.58	13.01	16.82	15.35	14.69	13.46	16.21	21.13	16.83	16.9075	14.47	13.13	18.29	18.34	16.0575	17.27	13.39	20.77	22.48	18.4775	20.14	14	12.31	18.58	16.2575
CSS0001352.1	CSS0001352	0	0	0	0	0	0	0	0	0	0	0	0	0	0	0	0	0	0	0	0	0	0	0	0	0
CSS0001353.1	CSS0001353	2.16	2.45	2.59	1.42	2.155	1.01	0.88	1.48	0.84	1.0525	1.66	0.91	1.04	0.15	0.94	0.99	1.06	0.46	2.37	1.22	2.35	2.23	2.47	2.65	2.425
CSS0001354.1	CSS0001354	3.59	5.05	5.8	3.94	4.595	1.71	2.29	4.26	1.88	2.535	1.72	2.45	3.98	4.14	3.0725	1.05	2.89	2.42	3.03	2.3475	3.51	4.43	4.94	3.15	4.0075
CSS0001355.1	CSS0001355	5.65	6.15	5.54	4.97	5.5775	4.86	2.97	5.16	2.69	3.92	5.8	4.6	4.48	4.78	4.915	5.03	3.98	4.1	5.2	4.5775	5.97	5.63	5.09	5.33	5.505
CSS0001356.1	CSS0001356	1.44	1.49	1.22	2.13	1.57	1.51	1.05	1.59	0.21	1.09	0.17	1.57	0	0.2	0.485	1.8	1.07	1.45	3.2	1.88	0.7	0.36	1.27	1.41	0.935
CSS0001357.1	CSS0001357	0	0	0	0	0	0	0	0	0	0	0	0	0	0	0	0	0	0	0	0	0	0	0	0	0
CSS0001358.1	CSS0001358	3.03	2.06	1.51	2.16	2.19	0.2	0.26	0.46	0	0.23	0.55	0.13	0.3	0	0.245	0.6	0.41	0	0.11	0.28	0.96	1.66	2.04	1.31	1.4925
CSS0001359.1	CSS0001359	0	0	0	0	0	0.25	0	0	0	0.0625	0	0	0	0	0	0.14	0	0	0	0.035	0	0	0	0	0
CSS0001360.1	CSS0001360	4.4	7.65	2.34	5.28	4.9175	1.35	2.79	0.84	2.17	1.7875	6.07	0.93	0.9	3.29	2.7975	1.93	2.4	2.89	2.08	2.325	3.81	0.97	4.5	3.39	3.1675
CSS0001361.1	CSS0001361	2.47	1.74	2.96	2.03	2.3	2.07	0.67	2.37	0.61	1.43	2.43	3.15	2.39	0.58	2.1375	2.45	0.99	1.72	4.09	2.3125	3.21	2.56	3.78	3.64	3.2975
CSS0001362.1	CSS0001362	0	0	0	0	0	0	0	0	0	0	0	0	0	0	0	0	0	0	0	0	0	0	0	0	0
CSS0001363.1	CSS0001363	0.33	0.5	0.92	0.22	0.4925	0.22	0.51	0.45	0.32	0.375	0.66	0.49	0.68	0.44	0.5675	0.39	0.29	0.34	1.02	0.51	0.28	1.09	1.09	0.88	0.835
CSS0001364.1	CSS0001364	8.78	8.97	8.64	8.53	8.73	3.02	2.02	6.79	2.26	3.5225	6.78	5.93	5.07	5.03	5.7025	3.96	7.35	5.14	10.42	6.7175	16.93	13.24	10.59	13.07	13.4575
CSS0001365.1	CSS0001365	0	0	0	0	0	0	0	0	0	0	0.69	0	0	0	0.1725	0	0	0	0	0	0	0	0	0	0
CSS0001366.1	CSS0001366	0	0	0	0	0	0	0	0	0	0	0	0	0	0	0	0	0	0	0	0	0	0	0	0	0
CSS0001367.1	CSS0001367	0	0.14	0.13	0	0.0675	0	0	0	0	0	0	0	0	0	0	0	0	0	0	0	0	0.27	0	0	0.0675
CSS0001368.1	CSS0001368	3.69	3.27	2.43	3.54	3.2325	2.83	3.5	2.37	2.8	2.875	3.2	2.89	3.22	4.19	3.375	2.36	2.06	2	3.23	2.4125	2.66	2.41	2.08	3.9	2.7625
CSS0001369.1	CSS0001369	0	0	0	0	0	0	0	0	0	0	0	0	0	0	0	0	0	0	0	0	0	0	0	0	0
CSS0001370.1	CSS0001370	0	0	0	0	0	0	0	0	0	0	0	0	0	28.36	7.09	0	0	0	0	0	0	10.98	0	0	2.745
CSS0001371.1	CSS0001371	12.16	12.97	12.47	9.27	11.7175	6.67	5.44	7.22	4.52	5.9625	9.24	7.53	7.37	6.79	7.7325	6.53	6.98	7.3	8.12	7.2325	15.11	16.87	9.14	9.95	12.7675
CSS0001372.1	CSS0001372	145.37	158.27	188.94	142.96	158.885	186.49	130.08	204.99	147.13	167.173	202.75	165.17	195.56	188.09	187.893	166.73	188.62	190.47	297.74	210.89	225.75	196.5	155.47	192.63	192.588
CSS0001373.1	CSS0001373	12.44	12.89	9.33	11.07	11.4325	7.94	10.44	8.91	7.47	8.69	10.46	11.77	7.95	10.01	10.0475	9.02	9.37	10.4	8.24	9.2575	11.7	12.02	13.11	12.51	12.335
CSS0001374.1	CSS0001374	0	0	0	0	0	0	0	0	0	0	0	0	0	0	0	0	0	0	0	0	0	0	0	0	0
CSS0001375.1	CSS0001375	0.56	0.43	0.41	0.14	0.385	0.26	0	0.12	0	0.095	0	0.27	0.66	0.61	0.385	0	0	0	0	0	0.13	0.14	0.56	0	0.2075
CSS0001376.1	CSS0001376	4.67	6.26	7.58	7.09	6.4	7.59	6.89	9.18	5.49	7.2875	7.45	9.59	6.31	10.47	8.455	7.75	6.15	5.74	7.37	6.7525	9.42	11.54	11.05	7.53	9.885
CSS0001377.1	CSS0001377	30.78	33.27	31.83	26.16	30.51	22.27	24.37	27.2	24.94	24.695	24.17	25.91	21.33	25.56	24.2425	24.84	20.96	20.46	24.21	22.6175	21.35	23.89	27.08	26.06	24.595
CSS0001378.1	CSS0001378	0	0	0	0	0	0	0	0	0	0	0	0	0	0	0	0	0	0	0	0	0	0	0	0	0
CSS0001379.1	CSS0001379	7.48	6.95	7.21	7.5	7.285	5.11	6.65	6.08	6.29	6.0325	6.77	6.47	6.33	6.53	6.525	6.67	6.35	6.97	6.13	6.53	5.96	5.94	6.9	7.39	6.5475
CSS0001380.1	CSS0001380	26.11	27.94	31.08	28.81	28.485	26.08	31.54	30.97	23.77	28.09	28.02	29.4	26.36	31.72	28.875	24.76	27.46	24.68	39.57	29.1175	29.52	29.55	32.31	32.77	31.0375
CSS0001381.1	CSS0001381	108.73	61.2	91.66	103.13	91.18	38.26	23.09	57.11	27.47	36.4825	41.92	30.8	28.63	20.49	30.46	27.95	64.8	35.19	12.36	35.075	77.08	82.49	59.46	58.02	69.2625
CSS0001382.1	CSS0001382	12.51	16.42	14.75	11.43	13.7775	11.37	10.3	13.17	10.97	11.4525	10.35	9.91	10.63	14.21	11.275	9.39	11	6.92	16.45	10.94	15.28	14.86	10.93	17.54	14.6525
CSS0001383.1	CSS0001383	0	0	0	0	0	0	0	0	0	0	0	0	0	0	0	0	0	0	0	0	0	0	0	0	0
CSS0001384.1	CSS0001384	8.32	7.11	8.62	11	8.7625	7.12	4.56	6.27	5.48	5.8575	9.3	7.94	7.26	8.05	8.1375	5.49	6.19	5.97	8.07	6.43	8.77	8.12	9.07	7.82	8.445
CSS0001385.1	CSS0001385	0	0	0	0	0	0	0	0	0	0	0	0	0	0	0	0	0	0	0	0	0	0	0	0	0
CSS0001386.1	CSS0001386	79.12	92.34	108.52	64.33	86.0775	113.3	88.5	113.42	93.26	102.12	109.66	87.16	95.56	120.22	103.15	118.52	119.5	117.81	166.45	130.57	147.65	130.76	102.8	108.26	122.367
CSS0001387.1	CSS0001387	83.73	50.64	41.14	63.7	59.8025	13.22	16.7	14.02	8.01	12.9875	9.64	17.14	13.22	21.05	15.2625	13.67	21.46	10.19	6.06	12.845	20.3	28.81	34.01	34.84	29.49
CSS0001388.1	CSS0001388	0	0	0	0	0	2.49	0	0	0	0.6225	0	0	0	0	0	0	0	0	0	0	0	2.66	2.96	0	1.405
CSS0001389.2	CSS0001389	115.56	110.64	105.77	102.58	108.637	78.03	101.26	83.62	79.32	85.5575	110.18	92.48	88.98	109.28	100.23	101.92	100.02	90.88	102.09	98.7275	123.35	125.55	116	116.36	120.315
CSS0001390.1	CSS0001390	1.75	1.92	1.55	2.1	1.83	0.73	1.67	1.04	0.84	1.07	1.05	1.29	1.63	1.47	1.36	1.38	0.83	0.73	1.26	1.05	1.33	2.87	1.54	1.5	1.81
CSS0001391.1	CSS0001391	0	0	0	0	0	0	0	0	0	0	0	0	0	0	0	0	0	0	0	0	0	0	0	0	0
CSS0001392.1	CSS0001392	8.96	12.3	9.61	9.32	10.0475	7.41	7.89	6.53	6.21	7.01	7.46	7.09	6.52	7.92	7.2475	7.69	8.61	6.87	5.39	7.14	7.06	7.71	7.69	6.99	7.3625
CSS0001393.1	CSS0001393	1.17	1.2	1.69	1.72	1.445	0.36	0.57	0.17	0.22	0.33	0.37	0.56	0.55	0	0.37	0.58	0.38	0.2	0	0.29	0.75	0.98	1.76	0.38	0.9675
CSS0001394.1	CSS0001394	0	0	0	0	0	0	0	0	0	0	0	0	0	0	0	0	0	0	0	0	0	0	0	0	0
CSS0001395.1	CSS0001395	14.55	9.38	11.25	12.23	11.8525	8.81	14.11	7.48	13.84	11.06	7.41	10.7	12.2	5.44	8.9375	6.71	9.45	8.83	7.94	8.2325	6.78	11.95	9.96	10.41	9.775
CSS0001396.1	CSS0001396	43.32	41.75	43.95	43.07	43.0225	33.52	47.21	37.32	34.17	38.055	43.17	41.36	36.61	46.86	42	40.81	44.58	40.98	48.42	43.6975	51.4	48.49	49.59	49.78	49.815
CSS0001397.1	CSS0001397	32.45	30.93	31.8	31.6	31.695	25.55	25.79	23.72	19.73	23.6975	30.87	23.05	23.82	23.5	25.31	21.99	20.65	22.99	25.11	22.685	29.15	32.13	32.45	29.84	30.8925
CSS0001398.1	CSS0001398	0	0	0	0	0	0	0	0	0	0	0	0	0	0	0	0	0	0	0	0	0	0	0.9	0	0.225
CSS0001399.1	CSS0001399	0.09	0	0	0.09	0.045	0	0	0	0	0	0	0	0	0	0	0	0	0	0	0	0	0	0	0	0
CSS0001400.1	CSS0001400	1.23	3	5.13	0.81	2.5425	1.14	0	0.87	1.38	0.8475	1.32	2.37	1.91	0.46	1.515	0.4	1	0.82	2.25	1.1175	3.4	2.06	1.68	2.05	2.2975
CSS0001401.1	CSS0001401	0.14	0.49	0	0.23	0.215	0.06	0.16	0.18	0.1	0.125	0.12	0.07	0.2	0.51	0.225	0.14	0.07	0.49	0.39	0.2725	0.62	0	0.61	0.18	0.3525
CSS0001402.1	CSS0001402	1.63	2.11	1.73	1.75	1.805	1.25	0.93	1.25	1.23	1.165	2.18	1.51	0.96	0.98	1.4075	1.7	2.08	0.26	2.28	1.58	2.02	1.72	2.86	1.37	1.9925
CSS0001403.1	CSS0001403	6.14	4.48	4.77	5.02	5.1025	2.31	2.27	6.62	1.45	3.1625	1.96	2.32	1.74	1.02	1.76	1.33	4.33	3.03	2.04	2.6825	1.14	0.8	1.05	1.15	1.035
CSS0001404.1	CSS0001404	4.3	2.9	2.44	2.62	3.065	7.58	1.15	2.49	5.28	4.125	3.15	2.29	1.13	4.22	2.6975	5.48	6.86	2.84	3.09	4.5675	2.44	2.39	2.08	2.16	2.2675
CSS0001405.1	CSS0001405	25.05	25.42	25.25	22.23	24.4875	16.8	23.18	23.11	19.59	20.67	20.7	24.77	23.06	27.31	23.96	18.17	24.69	25.29	24.25	23.1	27.35	28.5	27.53	25.8	27.295
CSS0001406.1	CSS0001406	1.07	0.31	0.52	0.52	0.605	0	1.03	0.8	1.21	0.76	0.26	0.51	1.26	1.48	0.8775	1.33	1.05	0.34	0.47	0.7975	0	0.27	1.62	0.35	0.56
CSS0001407.1	CSS0001407	13.91	11.12	10.14	8.9	11.0175	3.45	5.42	3.89	1.5	3.565	5.72	5.42	3.96	4.96	5.015	3.03	3.52	2.44	3.06	3.0125	6.42	10.08	10.03	8.51	8.76
CSS0001408.1	CSS0001408	30.35	31.15	26.02	28.27	28.9475	2.86	1.57	2.01	1.86	2.075	8.27	4.88	2.21	7.01	5.5925	2.16	2.9	2.23	1.77	2.265	10.37	8.51	8.87	10.64	9.5975
CSS0001409.1	CSS0001409	10.03	9.6	8.16	8.2	8.9975	6.31	5.34	2.61	2.55	4.2025	5.65	8.19	6.2	7.21	6.8125	5.06	4.4	5.32	3.23	4.5025	5.09	5.37	7.33	4.96	5.6875
CSS0001410.1	CSS0001410	24.17	25.25	25.78	21.72	24.23	18.26	26.27	22.54	19.51	21.645	23.18	26.47	23.35	29.61	25.6525	24.81	24.46	23.73	30.63	25.9075	28.15	31.41	28.18	28.61	29.0875
CSS0001411.1	CSS0001411	0	0	0	0	0	0	0	0	0	0	0	0	0	0	0	0	0	0	0	0	0	0	0	0	0
CSS0001412.1	CSS0001412	4.56	4.59	4.06	4.87	4.52	1.9	2.27	3.7	1.91	2.445	4.32	3.75	2.88	2.76	3.4275	4.28	2.58	2.56	4.83	3.5625	4.97	6.66	4.76	5.08	5.3675
CSS0001413.1	CSS0001413	0	0	0	0	0	0	0	0	0	0	0	0	0	0	0	0	0	0	0	0	0	0	0	0	0
CSS0001414.1	CSS0001414	13.67	14.45	16.33	13.59	14.51	16.77	21.19	19.38	16.66	18.5	16.35	15.11	17.55	18.49	16.875	16	18.36	21.11	18.88	18.5875	14.5	15.78	15.42	15.04	15.185
CSS0001415.1	CSS0001415	12.55	5.63	6.25	9.37	8.45	10.4	16.4	5.11	9.86	10.4425	9.66	4.55	10.97	8.07	8.3125	11.78	8.79	10.53	10.22	10.33	8.15	9.47	8.6	5.94	8.04
CSS0001416.1	CSS0001416	0	0	0	0	0	0.18	0.18	0	0.22	0.145	0.18	0	0	0	0.045	0.38	0.19	0.19	0	0.19	0.18	0	0	0.37	0.1375
CSS0001417.1	CSS0001417	0	0	0	0	0	0	0	0	0	0	0	0	0	0	0	0	0	0	0	0	0	0	0	0	0
CSS0001418.1	CSS0001418	11.86	7.74	6.45	6.77	8.205	8.45	0	5.64	7.06	5.2875	4.4	15.57	6.07	11.32	9.34	8.99	13.72	6.52	2.65	7.97	6.96	2.24	7.65	11.93	7.195
CSS0001419.1	CSS0001419	0.97	0	0.38	0	0.3375	0	0.19	0	0	0.0475	0	0	0	0	0	0	0	0	0	0	0	0	0.2	0	0.05
CSS0001420.1	CSS0001420	65.61	62.4	63.3	60.69	63	95	99.59	79.71	101.55	93.9625	80.82	79.02	78.91	76.15	78.725	98.6	87.11	91.74	62.29	84.935	55.81	50.78	58.16	64.47	57.305
CSS0001421.1	CSS0001421	0.8	0.55	3.09	1.25	1.4225	0.26	1.03	0.75	0.98	0.755	0.51	2.31	1.75	0.3	1.2175	0.8	0	0.54	1.12	0.615	1.04	1.07	1.08	2.1	1.3225
CSS0001422.1	CSS0001422	30.89	34.39	45.34	35.65	36.5675	27.05	26.16	39.94	23.68	29.2075	39.44	35.45	43.13	37.79	38.9525	21.38	26.03	27.42	51.7	31.6325	41.94	32.6	41.05	39.95	38.885
CSS0001423.1	CSS0001423	3.63	4.37	3.36	2.88	3.56	1.24	1.04	1.42	0.51	1.0525	1.89	1.71	1.61	0.97	1.545	1.24	0.87	0.72	1.47	1.075	1.88	2.42	2.75	3.18	2.5575
CSS0001424.1	CSS0001424	0.96	0	0.46	0	0.355	0	0	0.41	0.53	0.235	0.46	0	0	1.61	0.5175	0	0	0	0.51	0.1275	0	0	0	0.48	0.12
CSS0001425.1	CSS0001425	0	0	0	0	0	0	0	0	0	0	0	0	0	0	0	0	0	0	0	0	0	0	0	0	0
CSS0001426.1	CSS0001426	3.52	3.72	3.73	3.8	3.6925	3.9	2.96	3.06	1.96	2.97	3.21	3.5	3.43	3.63	3.4425	3.08	3.3	3.12	2.16	2.915	3.77	4.05	2.6	3.01	3.3575
CSS0001427.1	CSS0001427	5.69	5.63	6.75	6.11	6.045	3.83	4.02	4.65	3.46	3.99	4.11	4.67	3.78	4.36	4.23	3.24	3.94	4.17	4.36	3.9275	5.1	4.05	5.28	6.52	5.2375
CSS0001428.1	CSS0001428	77.25	74.16	71.49	71.93	73.7075	69.19	81.51	68.31	59.19	69.55	94.86	80.35	79.34	76.63	82.795	77.03	74.51	76.32	76.97	76.2075	90	94.19	90.76	77.74	88.1725
CSS0001429.1	CSS0001429	0	0	0	0	0	0	0	0	0	0	0	0	0	0	0	0	0	0	0	0	0	0	0	0	0
CSS0001430.1	CSS0001430	17.39	17.48	17.65	16.4	17.23	13.09	17.57	15.75	12.62	14.7575	15.03	14.4	13.88	16.05	14.84	17.79	17.32	16.5	19.45	17.765	21.54	20.63	18.32	19.78	20.0675
CSS0001431.1	CSS0001431	0.14	0.23	0.2	0	0.1425	0	0	0	0	0	0	0	0.34	0.23	0.1425	0.07	0	0	0.14	0.0525	0.34	0.23	0	0.2	0.1925
CSS0001432.2	CSS0001432	23.54	22.98	21.61	20.11	22.06	11.35	10.83	14.34	8.41	11.2325	13.2	14.29	10.49	13.65	12.9075	13.64	15.97	13.46	9.88	13.2375	23.28	25.62	17.95	19.55	21.6
CSS0001433.1	CSS0001433	5.91	0	0	0	1.4775	0	0	2.38	0	0.595	0	0	0	0	0	0	0	2.74	0	0.685	0	0	0	0	0
CSS0001434.1	CSS0001434	10.55	16.05	15.49	14.61	14.175	19.06	18.28	13.75	19.66	17.6875	21.85	19.34	18.61	18.62	19.605	21.13	18.98	15.66	18.11	18.47	11.03	13.79	12.12	13.15	12.5225
CSS0001435.1	CSS0001435	103.38	136.97	150.01	149.87	135.058	128.57	128.36	128.34	115.7	125.242	134.74	104.12	136.52	151.33	131.678	117.19	131.8	128.75	179.51	139.312	155.47	108.95	133.87	150.24	137.132
CSS0001436.1	CSS0001436	48.8	44.27	41.5	46.21	45.195	19.94	9.81	15.62	6.29	12.915	23.26	20.6	15.89	21.73	20.37	16.25	17.43	13.17	18.13	16.245	28.6	32.04	27.45	28.35	29.11
CSS0001437.1	CSS0001437	11.31	12.48	8.87	5.88	9.635	0.85	0.19	0.23	0.23	0.375	0.63	0.69	0.19	0.43	0.485	0.65	0.45	0.13	0.27	0.375	1.26	0.66	1.43	0.82	1.0425
CSS0001438.1	CSS0001438	11.18	7.92	10.13	7.84	9.2675	4.13	3.96	4.26	2.74	3.7725	6.03	5.73	3.83	7.25	5.71	3.79	5.7	3.71	5.06	4.565	8.46	6.27	5.85	7.2	6.945
CSS0001439.1	CSS0001439	0	0	0	0	0	0	0	0	0	0	0	0	0	0	0	0	0	0	0	0	0	0	0	0	0
CSS0001440.1	CSS0001440	11.47	11.32	10.78	13.62	11.7975	10.45	7.21	5.77	7.22	7.6625	15.39	11.91	12.92	16.04	14.065	9.07	7.88	8.76	10.06	8.9425	15.41	12.85	9.96	9.88	12.025
CSS0001441.1	CSS0001441	1.35	0.43	0.21	1.26	0.8125	0.57	1.43	0.49	1.14	0.9075	0.33	0.23	0.24	0.2	0.25	0.73	1.1	0.47	0.15	0.6125	0	0	0.18	0.22	0.1
CSS0001442.1	CSS0001442	468.27	442.5	356.98	367.15	408.725	351.71	160.54	229.84	197.01	234.775	239.4	186.08	123.14	177.09	181.428	427.34	363.69	265.11	141.88	299.505	263.98	323.84	231.04	237.55	264.102
CSS0001443.1	CSS0001443	0	0	0.16	0	0.04	0	0	0	0	0	0	0	0	0	0	0	0	0	0	0	0	0	0	0	0
CSS0001444.1	CSS0001444	6.36	4.37	4.46	7.19	5.595	3.6	5.89	4.72	6.01	5.055	4.69	4.47	4.61	4.64	4.6025	4.19	5.48	6.07	5.93	5.4175	4.11	5.67	6.67	5.2	5.4125
CSS0001445.1	CSS0001445	99.9	96.75	87.39	105.58	97.405	126.82	145.1	134.43	126.66	133.252	114.99	152.05	99.76	155.53	130.583	96.63	153.88	132.89	170.41	138.452	103.83	133.19	132.58	141.16	127.69
CSS0001446.1	CSS0001446	38.12	39.56	30.49	30.82	34.7475	90.95	40.18	58.47	76	66.4	70.19	72.73	65.92	68.14	69.245	69.04	47.42	41.29	30.97	47.18	26.87	23.62	25.7	26.24	25.6075
CSS0001447.1	CSS0001447	0	6.37	0	0	1.5925	0	0	0	0	0	0	0	0	3.48	0.87	0	0	0	3.26	0.815	2.89	0	0	0	0.7225
CSS0001448.1	CSS0001448	43.95	37.9	31.4	43.63	39.22	18.75	40.4	24.88	34.16	29.5475	33.96	30.68	30.79	31.51	31.735	35.73	30.48	32.97	31.93	32.7775	24.75	31.89	27.31	29.9	28.4625
CSS0001449.1	CSS0001449	0.17	1.16	1.33	0.59	0.8125	0.94	0.35	1.22	0.83	0.835	0.36	0.7	0.21	0	0.3175	0.32	0.15	0.86	1.14	0.6175	0.6	1.59	1.04	1.13	1.09
CSS0001450.1	CSS0001450	6.85	7.05	5.05	4.24	5.7975	0.83	0.99	0.56	0.44	0.705	1.1	1.71	1.69	1.39	1.4725	0.25	0.75	0.51	1.19	0.675	0.37	0.64	2.8	1.85	1.415
CSS0001451.1	CSS0001451	0.46	1.13	1.16	0.9	0.9125	1.28	0.72	0.24	0.95	0.7975	0.71	0.62	0.44	0.7	0.6175	0.55	0.63	0.74	1.61	0.8825	1.86	1.39	0.82	1.06	1.2825
CSS0001452.1	CSS0001452	0.12	0	0	0	0.03	0	0	0	0	0	0	0	0	0	0	0	0	0.13	0	0.0325	0	0	0	0	0
CSS0001453.1	CSS0001453	0	0	0	0	0	0	0	0	0	0	0	0	0	0	0	0	0	0	0	0	0	0	0	0	0
CSS0001454.1	CSS0001454	0.56	0.62	0.29	0.59	0.515	0	0.57	0.26	0	0.2075	0	0.57	0.84	0	0.3525	0	0.29	0.3	0	0.1475	0	0	1.27	1.17	0.61
CSS0001455.1	CSS0001455	0.94	0.98	0	0	0.48	0	0	0	0	0	0	0	0	0	0	0	0	0	0	0	0	0	0	0	0
CSS0001456.1	CSS0001456	29.83	29.58	24.21	24.82	27.11	36.85	31.41	20.62	25.58	28.615	32.74	33.46	26.84	31.55	31.1475	35.79	27.06	24.71	21.99	27.3875	25.35	31.9	23.42	22.47	25.785
CSS0001457.1	CSS0001457	2.57	4.73	4.67	2.95	3.73	2.9	4.45	5.38	5.45	4.545	5.27	4.96	4.66	5.86	5.1875	3.49	4.68	4.6	5.09	4.465	4.81	4.27	3.83	3.33	4.06
CSS0001458.1	CSS0001458	179.52	195.51	199.69	178.66	188.345	115.99	116.5	169.27	83.46	121.305	124.88	136.22	114.65	119.58	123.832	88.71	123.38	108.63	176.47	124.297	174.58	166.87	204.39	251.2	199.26
CSS0001459.1	CSS0001459	8.57	8.43	9.32	8.4	8.68	2.58	2.88	5.73	2.34	3.3825	7.35	6.04	5.33	5.02	5.935	3.05	4.84	2.49	8.6	4.745	9.64	7.37	9.51	12.12	9.66
CSS0001460.1	CSS0001460	9.94	13.56	10.31	12.95	11.69	13.18	20.34	14.21	22.49	17.555	15.17	14.95	21.01	19.8	17.7325	17.23	14.51	20.75	14.89	16.845	12.1	9.37	13.98	12.92	12.0925
CSS0001461.1	CSS0001461	10.21	10.55	8.43	8.47	9.415	5.58	11.07	9.17	5.04	7.715	8.11	7.71	8.44	10.8	8.765	7.3	8.77	7.65	12.88	9.15	9.9	8.66	10.3	10.66	9.88
CSS0001462.2	CSS0001462	7.66	8.39	6.41	6.3	7.19	3.13	2.03	2.25	2.5	2.4775	3.74	3.46	1.83	3.56	3.1475	5.03	3.28	3.32	2.45	3.52	3.69	4.17	4.2	3.76	3.955
CSS0001463.1	CSS0001463	6.81	7.09	9.88	12.26	9.01	10.77	5.75	16.01	5.8	9.5825	18.25	8.48	5.21	9.31	10.3125	8.3	4.6	11.52	17.15	10.3925	7.7	10.91	7.51	8.3	8.605
CSS0001464.1	CSS0001464	0	0	0	0	0	0	0	0	0	0	0	0	0	0	0	0	0	0	0	0	0	0	0	0	0
CSS0001465.1	CSS0001465	0	0	0	0	0	0	0	0	0	0	0	0	0	0	0	0	0	0	0	0	0	0	0	0	0
CSS0001466.1	CSS0001466	0.48	1.48	0.77	1.1	0.9575	0.74	0.77	0.98	1.46	0.9875	0.46	0.46	0.91	1.05	0.72	0.64	0.47	1.12	1	0.8075	0.92	0.64	0.32	0.77	0.6625
CSS0001467.1	CSS0001467	1.92	0	0	2.5	1.105	0	6.29	1.44	2.55	2.57	2.51	5.86	3.51	4.32	4.05	3.77	0	4.37	1.03	2.2925	0.99	4.7	1.59	3.71	2.7475
CSS0001468.1	CSS0001468	0	0.17	0	0.16	0.0825	0	0	0	0	0	0	0.16	0	0	0.04	0	0	0	0	0	0	0	0	0	0
CSS0001469.1	CSS0001469	9.52	8.55	6.55	6.98	7.9	9.89	7.05	4.28	5.42	6.66	12.14	10.43	5.37	11.36	9.825	9.32	6.29	5.91	3.6	6.28	9.2	11.42	6.2	6.14	8.24
CSS0001470.1	CSS0001470	0	0	0	0	0	0	0	0	0	0	0	0	0	0	0	0	0	0	0	0	0	0	0	0	0
CSS0001471.1	CSS0001471	17.8	15.02	12.77	12.15	14.435	4.6	2.59	8.55	2.81	4.6375	10.7	8.64	8.42	8.76	9.13	5.09	6.05	5	15	7.785	16.39	15.07	15.92	13.79	15.2925
CSS0001472.1	CSS0001472	73.98	97.1	77.95	64.85	78.47	78.3	89.1	85.35	52.6	76.3375	117.68	80.98	90.96	71.61	90.3075	71.41	88.63	78.69	108.38	86.7775	68.53	72.76	85.65	104.47	82.8525
CSS0001473.1	CSS0001473	27.07	25.86	25.26	23	25.2975	35.87	33.18	21.42	31.62	30.5225	24.03	30.09	17.98	32.79	26.2225	51.17	40.14	36.49	23.5	37.825	15.93	15.95	16.72	14.26	15.715
CSS0001474.1	CSS0001474	26.11	25.16	27.47	25.64	26.095	24.09	20.02	20.78	18.96	20.9625	21.79	21.21	21.16	23.97	22.0325	22	20.27	18.22	23.98	21.1175	22.61	21.96	26.18	23.64	23.5975
CSS0001475.1	CSS0001475	0.08	0.14	0.07	0.26	0.1375	0	0.09	0.08	0.1	0.0675	0.04	0.08	0	0	0.03	0.16	0.04	0	0.05	0.0625	0.12	0.21	0	0.08	0.1025
CSS0001476.1	CSS0001476	64.79	73.37	59.78	66.25	66.0475	86.1	54.09	128.61	64.8	83.4	119.94	75.64	75.62	58.9	82.525	99.59	121.35	135.67	90.71	111.83	170.09	247.62	167.34	221.23	201.57
CSS0001477.1	CSS0001477	4.02	1.4	0	2.62	2.01	2.45	0.63	1.71	0.73	1.38	0.64	1.27	0.61	0	0.63	0.66	0	3.27	4.31	2.06	1.96	1.32	0.69	0.67	1.16
CSS0001478.1	CSS0001478	11.14	19.32	9.88	7.69	12.0075	7.6	3.15	3.93	3.23	4.4775	10.26	9.47	6.9	11.04	9.4175	9.12	5.67	6.94	10.93	8.165	7.62	9.05	6.73	4.08	6.87
CSS0001479.1	CSS0001479	16.03	23.7	17.54	19.23	19.125	14.24	17.98	34.95	18.89	21.515	20.73	19.62	19.87	26.21	21.6075	14.64	26.45	25.58	29.73	24.1	21.18	17.04	19.67	28.22	21.5275
CSS0001480.1	CSS0001480	20.44	21.86	15.34	20.59	19.5575	18.53	22.81	7.88	15.05	16.0675	12.97	18.63	15.12	30.18	19.225	20.31	13.42	15.91	13.43	15.7675	9.1	12	14.2	9.35	11.1625
CSS0001481.1	CSS0001481	0.85	1.08	2.16	0.84	1.2325	1.03	0.84	0.49	0.41	0.6925	1.51	0.88	0.87	1.37	1.1575	1.06	0.64	0.61	1.04	0.8375	0.53	1.78	0.85	0.73	0.9725
CSS0001482.1	CSS0001482	0.36	0	0	0	0.09	0	0.42	0	0	0.105	0	0	0.17	0	0.0425	0	0	0	0.38	0.095	0	0.36	0	0	0.09
CSS0001483.1	CSS0001483	0	0	0	0.16	0.04	0	0	0	0	0	0	0	0.25	0	0.0625	0	0	0	0	0	0	0.19	0	0	0.0475
CSS0001484.1	CSS0001484	0	0.98	0.87	1.81	0.915	7.57	5.18	3.89	9.97	6.6525	1.75	2.63	5.85	1.06	2.8225	1.81	1.81	8.04	6.99	4.6625	0.9	0.91	2.88	4.62	2.3275
CSS0001485.1	CSS0001485	0	0	0	0	0	0	0	0	0	0	0	0	0	0	0	0	0	0	0	0	0	0	0	0	0
CSS0001486.1	CSS0001486	14.19	14.97	15.6	19.02	15.945	12.59	16.53	13.09	9.65	12.965	16.53	13.93	15.98	14.32	15.19	13.22	11.63	15.39	10.31	12.6375	12.65	15.77	14.7	16.46	14.895
CSS0001487.1	CSS0001487	0.13	0.16	0.03	0.05	0.0925	0	0.05	0.02	0.03	0.025	0	0.02	0.05	0.03	0.025	0.03	0	0.03	0.05	0.0275	0	0	0.03	0.05	0.02
CSS0001488.1	CSS0001488	6.02	39.46	21.71	11.41	19.65	5.35	15.9	52.11	5.91	19.8175	27.92	16.93	5.11	0	12.49	11.37	17.38	10.98	74.23	28.49	41.24	51.05	13	24.23	32.38
CSS0001489.1	CSS0001489	0	0	0	0	0	0	0	0	0	0	0	0	0	0	0	0	0	0	0	0	0	0	0	0	0
CSS0001490.2	CSS0001490	74.79	94.66	83.6	90.42	85.8675	85.83	107.57	138.3	158.73	122.607	111.41	148.21	177.13	157.2	148.488	75.49	122.82	144.39	147.45	122.537	135.89	91.1	143.36	114.24	121.148
CSS0001491.1	CSS0001491	0.07	0	0	0	0.0175	0	0	0	0	0	0	0	0	0	0	0	0	0	0	0	0	0	0	0	0
CSS0001492.1	CSS0001492	4.13	4.43	4.66	4.27	4.3725	2.8	4.1	2.99	3.07	3.24	3.43	3.72	3.73	4.94	3.955	3.76	3.13	2.86	4.34	3.5225	3.97	4.14	4.52	3.63	4.065
CSS0001493.1	CSS0001493	8.28	10.22	9.4	10.72	9.655	9.92	10.01	7.68	8.21	8.955	5.52	7.84	6.29	6.37	6.505	9.14	7.79	10.55	7.36	8.71	10.19	9.54	8.39	10.4	9.63
CSS0001494.1	CSS0001494	0.54	0.11	0.21	0.42	0.32	0.29	0	0.09	0	0.095	0.1	0.1	0	0	0.05	0.1	0	0	0.11	0.0525	0.1	0	0	0.1	0.05
CSS0001495.1	CSS0001495	0.98	0.99	1.52	0.47	0.99	3.47	3.37	2.3	1.23	2.5925	1.23	1.36	2.47	2.96	2.005	2.82	1.87	2.56	1.76	2.2525	1.73	1.06	1.43	1.68	1.475
CSS0001496.1	CSS0001496	67.99	63.37	69.3	73.13	68.4475	36.04	47.16	52.18	42.17	44.3875	51.79	42.92	50.95	44.12	47.445	39.3	50.61	50.62	45	46.3825	69.2	55.89	56.71	53.25	58.7625
CSS0001497.1	CSS0001497	0.14	0.29	0	0.42	0.2125	0	0.28	0.13	0.16	0.1425	0	0.14	0.13	0	0.0675	0.14	0.14	0	0	0.07	0.14	0	0	0.14	0.07
CSS0001498.1	CSS0001498	14.85	12.57	13.37	10.19	12.745	9.07	3.59	11.02	13.95	9.4075	22.43	9.28	13.2	16.12	15.2575	16.51	9.73	8.66	11.13	11.5075	8.73	4.09	7.96	4.83	6.4025
CSS0001499.1	CSS0001499	0	0	0.49	0	0.1225	0	0	0	0	0	0	0	0	0	0	0	0	0	0	0	0	0	0	0	0
CSS0001500.1	CSS0001500	31.52	26.88	21.73	26.44	26.6425	18.71	16.28	19.8	12.61	16.85	24.38	19.03	20.12	21.58	21.2775	16.59	17.69	17.14	16.46	16.97	24.17	24.82	18.15	21.83	22.2425
CSS0001501.1	CSS0001501	2.96	2.15	2.85	2.7	2.665	1.26	2.73	3.4	1.49	2.22	4.28	3.43	3.68	4.55	3.985	1.36	1.82	2.74	3.07	2.2475	2.86	3.23	4.4	2.83	3.33
CSS0001502.1	CSS0001502	6.37	7.56	6.29	6.75	6.7425	6.23	6.66	4.04	3.19	5.03	4.41	4.1	5.06	7.17	5.185	5.39	4.67	4.94	5.79	5.1975	9.49	4.93	8.34	6.2	7.24
CSS0001503.1	CSS0001503	4.72	4.7	5.31	4.87	4.9	4.52	4.97	4.72	5	4.8025	4.97	5.22	7.12	5.89	5.8	5.27	4.95	3.79	4.87	4.72	5.45	4.6	4.58	4.42	4.7625
CSS0001504.1	CSS0001504	3.04	3.21	3.4	1.85	2.875	1.92	1.95	1.7	2.01	1.895	2.02	3.22	2.78	2.84	2.715	0.78	0.77	1.06	1.98	1.1475	2.07	2.09	2.25	2.77	2.295
CSS0001505.1	CSS0001505	0	0	0	0	0	0	0	0	0	0	0	0	0	0	0	0	0	0	0	0	0	0	0	0	0
CSS0001506.1	CSS0001506	0	0	0	0	0	0	0	0	0	0	0	0	0	0	0	0	0	0	0	0	0	0	0	0	0
CSS0001507.1	CSS0001507	0	0	0	0	0	0	0	0	0	0	0	0	0	0	0	0	0	0	0	0	0	0	0	0	0
CSS0001508.1	CSS0001508	0	0	0.25	0	0.0625	0	0	0.23	0.15	0.095	0.17	0.25	0	0	0.105	0.13	0.13	0	0	0.065	0.13	0	0	0.63	0.19
CSS0001509.1	CSS0001509	59.1	93.54	67.04	50.43	67.5275	160.16	71.34	65.37	83.27	95.035	121.81	146.75	124.24	156.01	137.202	146.07	84.78	68.57	45.19	86.1525	65	66.68	63.09	37.91	58.17
CSS0001510.1	CSS0001510	13.23	14.15	13.42	12.56	13.34	10.67	11.07	11.95	11.43	11.28	12.15	11.76	10.18	12.57	11.665	9.64	12.49	12.06	13.23	11.855	15.03	13.34	12.57	14.2	13.785
CSS0001511.1	CSS0001511	0.13	0.1	0.44	0.12	0.1975	0.15	0.3	0.17	0.1	0.18	0.24	0.04	0.22	0	0.125	0.04	0.16	0.12	0.36	0.17	0.08	0.25	0.15	0.22	0.175
CSS0001512.1	CSS0001512	19.24	19.19	18.47	14.94	17.96	13.33	16.87	13.13	13.54	14.2175	22.18	18.32	16.1	22.27	19.7175	15.87	14.93	15.43	19.48	16.4275	22.12	21.01	18.52	17.71	19.84
CSS0001513.1	CSS0001513	0	0	0	0.7	0.175	0	0	0	0	0	0.34	0	0	0	0.085	0	0	0	0.38	0.095	0	0	0	0	0
CSS0001514.1	CSS0001514	1.03	0.66	0.34	0.47	0.625	0.67	0.44	0.43	0.54	0.52	0.83	0.55	0.41	0.38	0.5425	0.36	0.78	0.69	0.37	0.55	1.45	0.21	0.98	0.52	0.79
CSS0001515.1	CSS0001515	0	0	0	0	0	0	0	0	0	0	0	0	0	0	0	0	0	0	0	0	0	0	0	0	0
CSS0001516.1	CSS0001516	4.8	8.34	6.02	5.67	6.2075	3.98	2.81	2.93	1.6	2.83	4.64	3.61	3.98	2.92	3.7875	3.21	2.84	2.92	2.44	2.8525	4.23	5.92	5.56	5.38	5.2725
CSS0001517.1	CSS0001517	0	0.74	0	0	0.185	0	1.15	0.21	0	0.34	0.46	0	0	0.79	0.3125	0.47	0	0	0	0.1175	0.46	0	0	0.23	0.1725
CSS0001518.1	CSS0001518	0	0	0	0	0	0	0	0	0	0	0	0	0	0	0	0	0	0	0	0	0	0	0	0	0
CSS0001519.1	CSS0001519	0	0	0	0	0	0	0	0	0	0	0	0	0	10.09	2.5225	0	0	0	0	0	0	0	0	0	0
CSS0001520.1	CSS0001520	0	0	0	0	0	0	0	0	0	0	0	0	0	0	0	0	0	0	0	0	0.18	0	0	0	0.045
CSS0001521.1	CSS0001521	2.45	1.48	4.33	3.34	2.9	2.7	2.05	1.56	4.47	2.695	3.1	4.32	2.53	1.96	2.9775	3.42	3.34	1.64	3.99	3.0975	3.28	3.42	1.72	2.6	2.755
CSS0001522.1	CSS0001522	0	0.24	0	0.21	0.1125	0	0	0	0	0	0	0	0	0	0	0	0	0	0	0	0	0	0	0	0
CSS0001523.1	CSS0001523	1.44	1.12	1.37	1.23	1.29	0.99	2.21	1.23	1.39	1.455	1.37	0.51	0.83	1.81	1.13	1.24	0.7	1.41	1.53	1.22	0.87	1.96	2.02	1.96	1.7025
CSS0001524.1	CSS0001524	0	0	0	0	0	0	0	0	0	0	0	0	0	0	0	0	0	0	0	0	0	0	0	0	0
CSS0001525.1	CSS0001525	0	0	0	0	0	0	0	0	0	0	0	0	0	0	0	0	0	0	0	0	0	0	0	0	0
CSS0001526.1	CSS0001526	0	1.28	0	0	0.32	2.73	0	2.01	1.93	1.6675	0	0	0	0	0	5.28	1.18	1.16	0	1.905	0	0	0	0	0
CSS0001527.1	CSS0001527	0.63	0	1.14	0	0.4425	0.09	0.89	0.16	1.26	0.6	0.18	0.18	0.09	0.3	0.1875	0	0.18	0.37	0	0.1375	1.06	1.11	0.92	0.83	0.98
CSS0001528.1	CSS0001528	50.4	48.37	43.78	45.24	46.9475	80.86	79.6	89.69	99.92	87.5175	62.76	71.46	76.29	65.02	68.8825	83.9	86.75	89.29	47.97	76.9775	34.19	43.49	44.68	46.56	42.23
CSS0001529.1	CSS0001529	74.05	72.08	67.11	69.35	70.6475	54.68	64.49	57.93	52.34	57.36	64.86	67.19	51.01	65.11	62.0425	63.4	67.6	61.46	62.04	63.625	79.69	81.21	70.61	69.34	75.2125
CSS0001530.1	CSS0001530	1.67	3.06	1.9	2.03	2.165	0.84	0.58	2.57	0.82	1.2025	1.16	1.05	0.53	0.74	0.87	0.6	0.97	0.58	1.55	0.925	5.6	2.34	1.46	3.55	3.2375
CSS0001531.1	CSS0001531	0	0.29	0	0.82	0.2775	0.26	0.27	0.24	0	0.1925	0	0	0	0	0	0.28	0	0.28	0.59	0.2875	0.27	0.28	0	0	0.1375
CSS0001532.1	CSS0001532	0.48	0.16	0.24	0.33	0.3025	0.13	0	0.08	0.42	0.1575	0.23	0.29	0.26	0.09	0.2175	0.17	0.16	0.16	0.18	0.1675	0.33	0.31	0.28	0.17	0.2725
CSS0001533.1	CSS0001533	14.05	16.12	15.14	13.1	14.6025	10.84	11.81	11.75	9.13	10.8825	13.06	11.62	11.69	11.9	12.0675	9.82	10.15	10.47	17.25	11.9225	16.43	15.87	17.4	16.88	16.645
CSS0001534.1	CSS0001534	1.37	1.23	0.67	1.42	1.1725	0.16	1.45	0.25	1.24	0.775	0.91	0.64	0.96	1.05	0.89	0.11	0.06	0.78	0.89	0.46	0.85	0.61	0.8	0.86	0.78
CSS0001535.1	CSS0001535	0	0	0	0	0	0	0	0	0	0	0	0	0.16	0	0.04	0	0	0	0	0	0.16	0	0	0	0.04
CSS0001536.1	CSS0001536	2.63	1.75	6.57	4.33	3.82	2.85	3.46	3.95	2.8	3.265	3.17	2.52	2.66	2.57	2.73	2.51	2.03	4.01	2.34	2.7225	2.14	2.39	3.1	4.35	2.995
CSS0001537.1	CSS0001537	0.71	0.83	0.82	0.64	0.75	1.39	0.86	1.1	1.85	1.3	0.5	0.34	0.47	0.35	0.415	1.46	1.43	1.22	0.77	1.22	0.69	0.62	0.74	1	0.7625
CSS0001538.1	CSS0001538	4.29	3.02	3.16	2.86	3.3325	4.23	3.66	1.81	3.94	3.41	2.31	5.63	4.85	5.34	4.5325	3.39	6.27	6.3	4.79	5.1875	1.82	2.62	3.66	5.13	3.3075
CSS0001539.1	CSS0001539	0	0.48	0	0	0.12	0	0.22	0	0.26	0.12	0	0	0	0	0	0	0	0.23	0	0.0575	0	0.46	0.23	0	0.1725
CSS0001540.1	CSS0001540	0	0	0	0	0	0	0	0	0	0	0	0	0	0	0	0	0	0	0	0	0	0	0	0	0
CSS0001541.1	CSS0001541	0	0	0	0	0	0.11	0.12	0.22	0.42	0.2175	0.12	0	0	0.27	0.0975	0	0.24	0.12	0.13	0.1225	0	0	0	0.36	0.09
CSS0001542.1	CSS0001542	9.01	8.8	15.75	14.18	11.935	12.37	4.14	11.97	9.55	9.5075	4.28	4.02	10.03	12.56	7.7225	9.5	6.57	5.94	5.47	6.87	1.03	6	10.53	3.98	5.385
CSS0001543.1	CSS0001543	0.42	0.37	1.18	0.73	0.675	184.54	143.62	28.95	233.47	147.645	9.14	33.67	15.12	16.22	18.5375	357.45	104.35	72.48	16.17	137.612	1.14	1.02	9.83	1.47	3.365
CSS0001544.1	CSS0001544	12.71	12.66	13.13	11.93	12.6075	5.1	5.82	5.29	4.53	5.185	5.48	3.97	4.39	4.17	4.5025	5.29	6.26	3.67	4.97	5.0475	9.73	10.46	13.13	9.57	10.7225
CSS0001545.1	CSS0001545	2.59	2.54	2.52	1.89	2.385	2.44	1.17	1.14	0.55	1.325	2.93	2.07	2.35	2.88	2.5575	1.77	1.23	1.95	2.53	1.87	2.77	2.1	2.49	2.75	2.5275
CSS0001546.1	CSS0001546	909.85	974.4	1007.78	916.71	952.185	809.43	770.15	933.61	772.84	821.508	933.5	884.43	937.08	867.59	905.65	811.64	928.61	826.01	946.63	878.223	1088.56	1034.36	1012.23	930.51	1016.41
CSS0001547.1	CSS0001547	64.61	51.36	56.3	61.96	58.5575	14.35	13.79	26.05	12.2	16.5975	23.23	17.97	17.49	17.34	19.0075	19.54	22.75	15.62	5.36	15.8175	36.77	45.12	26.68	24.25	33.205
CSS0001548.1	CSS0001548	0	0	0	0	0	0	0	0	0	0	0	0	0	0	0	0	0	0	0	0	0	0	0	0	0
CSS0001549.1	CSS0001549	11.95	5.17	7.33	2.06	6.6275	3.85	5.3	1.79	10.75	5.4225	2.67	4.01	3.21	3.18	3.2675	12.44	11.7	4.11	3.02	7.8175	1.37	1.39	7.98	4.9	3.91
CSS0001550.1	CSS0001550	0	0	0	0	0	0	0	0	0	0	0	0	0	0	0	0	0	0	0	0	0	0	0	0	0
CSS0001551.1	CSS0001551	42.46	41.06	36.88	39.91	40.0775	36.87	38.93	33.49	29.83	34.78	46.37	33.12	33.49	40.16	38.285	33.23	30.03	39.25	30.94	33.3625	36.63	43.4	35.44	29.79	36.315
CSS0001552.1	CSS0001552	1.41	0	1.31	0	0.68	0	2.59	1.16	0	0.9375	0	0	1.25	0	0.3125	1.36	0	0	0	0.34	0	0	1.47	0	0.3675
CSS0001553.1	CSS0001553	1.72	0.35	0.89	0.79	0.9375	0.96	1	1.01	0.66	0.9075	1.44	0.88	0.44	2.5	1.315	0.69	2.37	1.27	1.07	1.35	0.55	0.81	1.61	1.22	1.0475
CSS0001554.1	CSS0001554	14.18	19.78	19.78	16.92	17.665	13.3	12.47	18.88	10.72	13.8425	12.95	17.79	18.06	15.79	16.1475	13.8	16.57	13.14	14.42	14.4825	24.27	15.88	13.36	23.15	19.165
CSS0001555.1	CSS0001555	15.21	19.17	21.01	17.57	18.24	15.28	10.44	10.94	12.77	12.3575	9.66	9.57	9.66	9.13	9.505	12.43	11.96	13.54	16.06	13.4975	17.01	17.78	17.57	18.88	17.81
CSS0001556.1	CSS0001556	0	0	0	0	0	0	0	0	0	0	0	0	0	0	0	0	0	0	0	0	0	0	0	0	0
CSS0001557.1	CSS0001557	2.64	2.14	2.17	2.19	2.285	1.62	2.52	1.86	1.86	1.965	2.56	1.82	1.87	2.81	2.265	3.35	1.92	1.98	2.74	2.4975	2.76	2.6	3.13	3.16	2.9125
CSS0001558.1	CSS0001558	0	0	0	0	0	0	0	0	0	0	0	0	0	0	0	0	0	0	0	0	0	0	0	0	0
CSS0001559.1	CSS0001559	3.87	1.9	0.98	1.99	2.185	2.11	3.62	1.64	2.54	2.4775	1.91	2.76	1.74	2.55	2.24	4.09	2.16	2.39	3.25	2.9725	1.78	4.05	3.29	3.89	3.2525
CSS0001560.1	CSS0001560	29.56	33.08	26.17	34.67	30.87	30.02	35.59	35.83	42.04	35.87	22.14	23.65	29.67	32.56	27.005	38.05	26.41	33.73	34.32	33.1275	15.93	20.97	28.67	37.7	25.8175
CSS0001561.1	CSS0001561	0	0.33	0	0	0.0825	0	0	0	0	0	0	0.28	0	0	0.07	0	0	0	0	0	0	0	0	0	0
CSS0001562.1	CSS0001562	11.86	13.45	12.95	20.41	14.6675	11.88	7.92	22.41	11.93	13.535	16.62	13.84	18.65	16.24	16.3375	10.85	17.01	7.73	19.58	13.7925	24.16	21.67	22.88	18.92	21.9075
CSS0001563.1	CSS0001563	36.75	23.91	26.69	24.71	28.015	7.99	21.18	18.1	8.02	13.8225	12.49	18.85	20.43	14.35	16.53	12.83	16.2	26.06	18.37	18.365	10.89	13.91	16.5	19.01	15.0775
CSS0001564.1	CSS0001564	18.6	16.55	16.41	16.97	17.1325	10.12	11.92	11.96	10.49	11.1225	14.73	14.68	13	15.44	14.4625	14.4	12.01	14.38	18.89	14.92	18.72	16.06	15.5	18.13	17.1025
CSS0001565.1	CSS0001565	4.75	5.15	4	4.87	4.6925	1.77	1.9	1.45	1.27	1.5975	2.14	1.94	2.09	2.77	2.235	2.25	2.07	1.42	1.93	1.9175	3.01	4.12	3.01	3.53	3.4175
CSS0001566.1	CSS0001566	0.09	0.1	0.46	0.28	0.2325	0.09	0	0	0.11	0.05	0	0.09	0.18	0.1	0.0925	0.38	0.09	0.1	0	0.1425	0	0.28	0	0.09	0.0925
CSS0001567.1	CSS0001567	28.16	17.24	29.73	13.6	22.1825	9.03	34.73	21.34	16.65	20.4375	13.17	9.46	21.16	14.09	14.47	15.48	11.71	26.45	19.86	18.375	33.44	17.43	12.74	20.19	20.95
CSS0001568.1	CSS0001568	5.19	3.29	3.76	5.43	4.4175	5.45	6.47	2.94	6.25	5.2775	6.19	4.16	3.69	6.04	5.02	4.98	4.35	3.91	7.11	5.0875	4.06	4.57	3.99	6.32	4.735
CSS0001569.1	CSS0001569	0	0	0	0	0	0	0	0	2.83	0.7075	3.57	0	0	0	0.8925	0	0	0	0	0	0	0	0	0	0
CSS0001570.1	CSS0001570	0.72	0.99	1.16	0.71	0.895	0.22	0.7	0.21	0.82	0.4875	0.23	0.46	0	0.79	0.37	0.24	0.24	0	0.75	0.3075	0.46	0	0.48	0.23	0.2925
CSS0001571.1	CSS0001571	0	1.37	0.62	0	0.4975	0	0	0	0.18	0.045	0	1.87	0.6	0	0.6175	0	0	0	0	0	0	1.29	2.02	0.65	0.99
CSS0001572.1	CSS0001572	0	0	0	0	0	0	0	0.05	0	0.0125	0.03	0	0	0	0.0075	0.03	0	0	0	0.0075	0	0	0	0.03	0.0075
CSS0001573.1	CSS0001573	1.98	1.5	2.31	2.74	2.1325	9.05	13.73	5.67	9.64	9.5225	3.93	6.02	5.15	6.62	5.43	10.96	9.49	9.09	3.68	8.305	1.69	1.87	1.1	1.06	1.43
CSS0001574.1	CSS0001574	6.57	7.83	7.49	7.71	7.4	2.53	2.46	4.38	1.23	2.65	6.61	4.08	5.26	5.41	5.34	1.91	3.71	4.08	6.65	4.0875	10.57	9.39	8.38	8.05	9.0975
CSS0001575.1	CSS0001575	0	0	0	0	0	0	0	0	0	0	0	0	0	0	0	0	0	0	0	0	0	0	0	0	0
CSS0001576.1	CSS0001576	0	0	0	0	0	0	0	0	0	0	0	0	0	0	0	0	0	0	0	0	0	0	0	0	0
CSS0001577.1	CSS0001577	0	0	0.13	0	0.0325	0.12	0.65	0	0.85	0.405	0.19	0	0.06	0	0.0625	0.4	0.13	0.07	0.14	0.185	0.06	0.13	0.07	0.19	0.1125
CSS0001578.1	CSS0001578	0.43	0.6	0.49	0.6	0.53	0.24	0.36	0.19	0.64	0.3575	0.28	0.58	0.28	0.75	0.4725	0.13	0.17	0.43	0.23	0.24	0.21	0.31	0.48	0.58	0.395
CSS0001579.1	CSS0001579	80.14	84.76	67.29	95.81	82	53.76	75.21	55.05	52.18	59.05	52.8	67.58	69.48	75.12	66.245	53.62	73.05	67.34	42.82	59.2075	56.64	68.42	71.76	68.69	66.3775
CSS0001580.1	CSS0001580	0	0	0	0	0	0	0	0	0	0	0	0	0	0	0	0	0	0	0.13	0.0325	0	0	0	0	0
CSS0001581.1	CSS0001581	50.19	38.24	40.55	68.03	49.2525	68.62	76.83	76	98.82	80.0675	66.04	77.63	91.96	83.64	79.8175	59.2	71.41	79.44	84.87	73.73	37.56	33.82	88.02	94.95	63.5875
CSS0001582.1	CSS0001582	0	0	0	0	0	0	0	0	0	0	0	0	0	0	0	0	0	0	0	0	0	0	0	0	0
CSS0001583.1	CSS0001583	55.96	50.6	56.56	54.52	54.41	42.36	33.29	36.36	32.51	36.13	35.35	44.72	30.23	24.9	33.8	27.53	42.41	43.82	25.91	34.9175	21.23	34.54	40.18	35.32	32.8175
CSS0001584.1	CSS0001584	25.66	19.83	33.68	24.56	25.9325	24.04	24.27	26.11	22.15	24.1425	16.48	22.68	20.15	22.02	20.3325	33.7	26.34	20.32	27.44	26.95	24.41	29.04	20.1	27.32	25.2175
CSS0001585.1	CSS0001585	0	0.33	0.31	0.31	0.2375	0	0	0	0.37	0.0925	0	0	0.15	0.17	0.08	0.33	0	0	0	0.0825	0.2	0	0.34	0.31	0.2125
CSS0001586.1	CSS0001586	0	0	0	0	0	0	0	0	0	0	0	0	0	0	0	0	0	0	0	0	0	0	0	0	0
CSS0001587.1	CSS0001587	0	0	0	0.07	0.0175	0	0.07	0.13	0.08	0.07	0	0	0	0	0	0	0	0.22	0	0.055	0	0	0.07	0.14	0.0525
CSS0001588.1	CSS0001588	1.41	0	2.62	0	1.0075	1.27	2.59	2.33	0	1.5475	5.29	0	0	0	1.3225	0	0	0	0	0	0	0	1.47	2.82	1.0725
CSS0001589.1	CSS0001589	0	0	0	0	0	0	0	0	0	0	0	0	0	0	0	0	0	0	0	0	0	0	0	0	0
CSS0001590.1	CSS0001590	0	0	0	0	0	0	0	0	0	0	0	0	0	0	0	0	0	0	0	0	0	0	0	0	0
CSS0001591.2	CSS0001591	5.41	4.69	2.49	4.04	4.1575	16.03	8.63	3.78	21.37	12.4525	4.42	3.96	3.04	2.53	3.4875	35.53	13.57	13.35	1.92	16.0925	3.74	2.42	3.41	2.32	2.9725
CSS0001592.1	CSS0001592	0	0	0	0	0	0	0	0	0	0	0	0	0	0	0	0	0	0	0	0	0	0	0	0	0
CSS0001593.1	CSS0001593	0	0	0	0	0	0	0	0	0	0	0	0	0	0.33	0.0825	0	0	0	0	0	0	0	0	0	0
CSS0001594.1	CSS0001594	0	0	10.36	10.99	5.3375	10.43	0	0	0	2.6075	0	11.02	19.71	0	7.6825	0	0	10.62	26.24	9.215	0	32.95	25.64	0	14.6475
CSS0001595.1	CSS0001595	43.95	36.19	36.17	33.51	37.455	20.32	18.85	16.94	14.1	17.5525	21.34	20.45	15.45	17.5	18.685	20.78	19.73	15.66	11.78	16.9875	21.57	35.17	19.82	22.95	24.8775
CSS0001596.1	CSS0001596	0	0	0	0	0	0	0	0	0	0	0	0	0	0	0	0	0	0	0	0	0	0	0	0	0
CSS0001597.1	CSS0001597	0	0	0	0	0	0	0	0	0	0	0	0	0	0	0	0	0	0	0	0	0	0	0	0	0
CSS0001598.1	CSS0001598	13.95	12.48	9.51	9.29	11.3075	3.66	3.32	3.43	0.55	2.74	3.33	4.28	4.6	2.79	3.75	1.97	2.45	1.47	0.53	1.605	3.88	5.94	5.61	4.94	5.0925
CSS0001599.1	CSS0001599	0	0.11	0.11	0	0.055	0	0	0	0	0	0	0	0	0	0	0.11	0	0	0	0.0275	0	0	0.11	0	0.0275
CSS0001600.1	CSS0001600	12.17	13.07	11.41	10.12	11.6925	9	9.34	9.53	10.66	9.6325	11.08	10.55	11.05	12.51	11.2975	6.87	8.35	9.05	9.35	8.405	10.02	7.65	11.83	9.35	9.7125
CSS0001601.1	CSS0001601	0	0	0.13	0.26	0.0975	0	0.25	0	0	0.0625	0	0	0	0	0	0.13	0.13	0	0	0.065	0	0	0	0	0
CSS0001602.1	CSS0001602	0	0	0	0	0	0	0	0	0	0	0	0	0	0	0	0	0	0	0	0	0	0	0	0	0
CSS0001603.1	CSS0001603	0.43	0.74	0.21	0.57	0.4875	0.74	0.78	0.44	0.34	0.575	0.67	0.7	1.03	0.47	0.7175	0.58	0.5	0.37	0.67	0.53	0.14	0.36	0.72	0.69	0.4775
CSS0001604.1	CSS0001604	94.56	79.82	86.46	86.13	86.7425	76.44	83	63.39	67.05	72.47	81.03	76.13	64.84	61.78	70.945	66.24	62.75	69.09	73.63	67.9275	54.69	50.1	75.63	76.63	64.2625
CSS0001605.1	CSS0001605	15.98	16.48	13.78	13.56	14.95	11.44	13.19	11.37	11.76	11.94	12.44	12.92	11.26	14.5	12.78	13.75	14.31	13.75	11.96	13.4425	14.66	13.71	14.52	15.41	14.575
CSS0001606.1	CSS0001606	0	0	0	0	0	0	0	0	0	0	0	0	0	0	0	0	0	0.07	0	0.0175	0	0	0	0	0
CSS0001607.1	CSS0001607	0.68	1.41	1.37	1.08	1.135	0.67	1.16	0.9	0.82	0.8875	2.28	1.82	1.26	3.02	2.095	1.62	0.57	1.08	1.01	1.07	0.79	0.81	1.44	1.05	1.0225
CSS0001608.1	CSS0001608	1.54	0	0.43	1.66	0.9075	0	0	0.89	0	0.2225	1.94	0.45	1.54	0	0.9825	0	1.57	0	1.4	0.7425	0.4	1.07	3.55	2.55	1.8925
CSS0001609.1	CSS0001609	10.42	9.6	10.07	7.92	9.5025	5.41	8.16	8.14	8.82	7.6325	5.89	9.83	9.84	8.4	8.49	4.66	6.77	8.18	11.5	7.7775	10.33	7.69	11.53	13.91	10.865
CSS0001610.1	CSS0001610	3.98	3.49	2.36	4.11	3.485	2.87	3.39	2.56	3.11	2.9825	4.43	4.93	2.88	4.49	4.1825	3.41	4.18	3.65	1.83	3.2675	3.6	2.64	3.59	2.84	3.1675
CSS0001611.1	CSS0001611	20.67	21.06	17.96	19.36	19.7625	13.55	17.31	16.54	14.25	15.4125	17.24	12.78	13.98	17.86	15.465	17.79	18.89	16.01	19.17	17.965	20.59	20.04	18.88	18.63	19.535
CSS0001612.1	CSS0001612	4.58	6.08	4.91	5.47	5.26	3.63	3.71	4.3	3.17	3.7025	5.61	4.29	4.59	2.28	4.1925	3.87	2.94	4.13	5.43	4.0925	4.04	4.28	6.19	3.43	4.485
CSS0001613.1	CSS0001613	0.23	0.12	0	0.13	0.12	0.11	0.11	0.4	0.39	0.2525	0.11	0	0	0	0.0275	0	0	0	0.35	0.0875	0.11	0.11	0.11	0.11	0.11
CSS0001614.1	CSS0001614	0	0	0	0	0	0	0	0	0	0	0	0	0	0	0	0	0	0.27	0	0.0675	0	0	0	0	0
CSS0001615.1	CSS0001615	0	0	0.09	0.18	0.0675	0	0	0.16	0.21	0.0925	0	0.09	0	0.29	0.095	0	0.18	0	0.28	0.115	0	0	0	0.17	0.0425
CSS0001616.1	CSS0001616	0	0	0	0	0	0	0	0	0	0	0	0	0	0	0	0	0	0	0	0	0	0	0	0	0
CSS0001617.1	CSS0001617	0	0	0	0	0	0.04	0	0	0.05	0.0225	0	0	0	0	0	0	0	0	0	0	0	0.05	0	0	0.0125
CSS0001618.1	CSS0001618	0	0	0	0	0	0	0	0	0	0	0	0	0	0	0	0	0	0	0	0	0	0	0	0	0
CSS0001619.1	CSS0001619	0	0	0	0	0	0	0	0	0	0	3.81	0	0	9.75	3.39	7.78	0	0	0	1.945	12.03	7.77	17.57	0	9.3425
CSS0001620.1	CSS0001620	0	0.4	0	0	0.1	0	0	0	0	0	0.37	0	0	0	0.0925	0	0	0	0	0	0	0	0	0	0
CSS0001621.1	CSS0001621	0.08	0.18	0.08	0	0.085	0.16	0.49	0.3	0	0.2375	0	0.08	0	0	0.02	0.08	0.42	0	0.09	0.1475	0.08	0.09	0.17	0	0.085
CSS0001622.1	CSS0001622	27.08	26.62	351.42	35.23	110.088	2778.28	1798.89	619	2510.11	1926.57	283.29	720.5	290.86	451.68	436.583	3823.45	1750.03	1419.75	249.53	1810.69	42.69	70.2	91.61	41.5	61.5
CSS0001623.1	CSS0001623	0	0	0	0	0	0	0	0	0	0	0	0	0	0	0	0	0	0	0	0	0	0	0	0	0
CSS0001624.1	CSS0001624	29.49	24.38	29.37	28.55	27.9475	31.06	33.79	42.78	30.32	34.4875	23.91	36.75	24.9	41.21	31.6925	30.7	29.39	33.99	31.15	31.3075	23.04	20.26	23.19	36.31	25.7
CSS0001625.1	CSS0001625	2.84	6.76	2.72	0	3.08	4.49	1.94	6.33	3.18	3.985	2.72	2.72	3.78	0.45	2.4175	4.83	5.19	2.41	4.3	4.1825	8.69	1.62	3.73	4.01	4.5125
CSS0001626.1	CSS0001626	0.22	0	0.43	0	0.1625	0	0	0.1	0	0.025	0	0	0	0	0	0.22	0	0.11	0.23	0.14	0.21	0.34	0	0	0.1375
CSS0001627.1	CSS0001627	6.23	6.32	5.55	6.43	6.1325	6.74	6.32	5.27	6.7	6.2575	6.32	6.32	5.02	5.14	5.7	6.32	4.87	5.86	6.46	5.8775	6.17	4.91	5.47	6.47	5.755
CSS0001628.1	CSS0001628	0	0	0	0	0	0	0	0	0	0	0	0	0	0	0	0	0	0	0	0	0	0	0	0	0
CSS0001629.1	CSS0001629	0.18	0.07	0.27	0.14	0.165	0.3	0.23	0.38	0.14	0.2625	0.23	0.18	0.25	0.28	0.235	0.28	0.11	0.18	0.31	0.22	0.52	0.4	0.13	0.29	0.335
CSS0001630.1	CSS0001630	0	0	0	0	0	0	0	0	0	0	0	0	0	0	0	0	0	0	0	0	0	0	0	0	0
CSS0001631.1	CSS0001631	47.74	47.83	47.84	49.2	48.1525	41.17	46.82	38.45	43.03	42.3675	45.37	49.19	40.15	55.53	47.56	37.57	40.37	40.06	38.93	39.2325	42.29	39.18	42.72	37.16	40.3375
CSS0001632.1	CSS0001632	19.6	24.06	22.86	26.36	23.22	11.75	12.88	8.58	6.32	9.8825	15.46	14.69	5.63	20.33	14.0275	11.75	8.45	5.62	9.66	8.87	20.89	22.45	26.35	17.23	21.73
CSS0001633.1	CSS0001633	0	0	0	0	0	0	0	0	4.7	1.175	0	0	0	0	0	0	0	0	0	0	0	4.49	0	0	1.1225
CSS0001634.1	CSS0001634	0	0	0	0	0	0	0	0	0	0	0	0	0	0	0	0	0	0	0	0	0	0	0	0	0
CSS0001635.1	CSS0001635	81.29	79.31	42.58	61.75	66.2325	75.54	56.72	36.06	54.75	55.7675	91.31	85.71	56.02	112.39	86.3575	67.49	60.2	67.18	63.15	64.505	58.73	72.69	73.97	54.49	64.97
CSS0001636.1	CSS0001636	54.14	52.64	51.07	47.39	51.31	127.39	77.02	61.56	63.17	82.285	111.05	64.81	60.85	88.87	81.395	124.99	91.48	88.31	96.2	100.245	56.28	77.18	62.82	50.61	61.7225
CSS0001637.1	CSS0001637	4	2.61	2.59	2.63	2.9575	1.24	0.78	1.42	0.31	0.9375	1.68	2.19	2.03	3.21	2.2775	0.53	0.39	1.48	1.94	1.085	3.61	2.56	2.55	2.2	2.73
CSS0001638.1	CSS0001638	0.49	0.38	0.81	0.5	0.545	0.46	0.07	0.44	0.17	0.285	0.19	0.2	0.33	0.21	0.2325	0.2	0.4	0.35	0.48	0.3575	0.47	0.51	0.71	0.51	0.55
CSS0001639.1	CSS0001639	8.82	8.04	5.91	7.21	7.495	6.78	9.94	6.09	7.4	7.5525	7.85	7.69	6.05	8.79	7.595	5.35	8.77	8.59	6.26	7.2425	6.1	6.22	8.22	5.45	6.4975
CSS0001640.1	CSS0001640	23.16	21.62	22.12	22.82	22.43	14.71	21.77	14.08	16.77	16.8325	19.55	19.83	16.99	20.05	19.105	16.44	17.21	18.34	18.14	17.5325	21.02	23.69	22.02	20.85	21.895
CSS0001641.1	CSS0001641	613.79	663.19	814.1	576.3	666.845	800.64	686.15	915.31	814.34	804.11	796.54	782.52	803.01	815.77	799.46	658.59	777.98	764.86	1223.2	856.158	842.85	652.42	801.77	924.72	805.44
CSS0001642.1	CSS0001642	0	0	0	0	0	0	0	0	0	0	0	0	0	0	0	0	0	0	0	0	0	0	0	0	0
CSS0001643.1	CSS0001643	12.2	13.8	11.29	11.81	12.275	12.52	8.96	11.43	7.92	10.2075	8.95	7.24	6.68	5.66	7.1325	12.51	13.46	12.46	5.43	10.965	4.91	9.4	6.23	8.63	7.2925
CSS0001644.1	CSS0001644	0	0	0	0	0	0	0	0	0	0	0	0	0	0	0	0	0	0	0	0	0	0	0	0	0
CSS0001645.1	CSS0001645	0	3.4	0	0	0.85	0	0	0	0	0	0	0	0	0	0	0	0	0	0	0	0	0	0	0	0
CSS0001646.1	CSS0001646	13.24	16.18	14.44	14.2	14.515	11.56	13.78	12.08	11.34	12.19	16.14	13.58	14.14	16.56	15.105	11.65	13.33	12.51	17.67	13.79	19.72	16.13	16.1	17.88	17.4575
CSS0001647.1	CSS0001647	0	0	0	0.32	0.08	0.15	0.16	0	0	0.0775	0.32	0	0.2	0	0.13	0	0	0	0.17	0.0425	0	0	0	0	0
CSS0001648.1	CSS0001648	2.44	3.79	1.99	2.59	2.7025	9.69	4.06	3.31	9.46	6.63	7.02	9.85	6.71	8.98	8.14	18.19	7.4	5.7	2.38	8.4175	4	3.49	2.37	2.93	3.1975
CSS0001649.1	CSS0001649	0	0	0	0	0	0	0	0	0	0	0	0	1.12	0	0.28	0	0	0	0	0	0	1.22	0	0	0.305
CSS0001650.1	CSS0001650	0	0	0	0	0	0	0	0	0	0	0	0	0	0	0	0	0	0	0	0	0	0	0	0	0
CSS0001651.1	CSS0001651	30.18	31.25	24.11	32.28	29.455	21.65	29.44	21.24	23.85	24.045	25.63	26.75	23.44	28.58	26.1	21.33	21.38	20.66	19.58	20.7375	21.37	21.86	30	22.96	24.0475
CSS0001652.1	CSS0001652	0.24	0.25	0.24	0	0.1825	0.23	0.47	0.43	0.28	0.3525	0.7	0.23	0	0.27	0.3	0	0	0	0.51	0.1275	1.18	0.98	0.74	1.2	1.025
CSS0001653.1	CSS0001653	0.23	0.12	0.11	0.11	0.1425	0.11	0	0	0.13	0.06	0.33	0	0	0.25	0.145	0	0	0.12	0.12	0.06	0.22	0.12	0.12	0.34	0.2
CSS0001654.1	CSS0001654	11.26	12.51	9.12	10.17	10.765	12.34	7.04	10.47	7.1	9.2375	11.03	11.72	10.12	12.25	11.28	7.1	8.27	10.95	12.67	9.7475	8.47	9.89	10.87	11.98	10.3025
CSS0001655.1	CSS0001655	0	0	0	0	0	0	0	0	0	0	0	0	0	0	0	0	0	0	0	0	0	0	0	0	0
CSS0001656.1	CSS0001656	92.01	99.1	108.81	98.79	99.6775	77.8	87.63	79.99	85.91	82.8325	87.07	96.98	86.76	106.33	94.285	95.71	90.86	87.15	78.29	88.0025	108.82	76.18	109.73	129.2	105.983
CSS0001657.1	CSS0001657	0	0	0	0	0	0	0	0	0	0	0	0	0	0	0	0	0	0	0	0	0	0	0	0	0
CSS0001658.1	CSS0001658	78.15	72.1	62.99	70.28	70.88	28.34	37.77	41.12	29.28	34.1275	43.03	44.55	28.87	40.31	39.19	27.94	29.51	34.94	24.72	29.2775	39.3	42.91	49.83	49.58	45.405
CSS0001659.1	CSS0001659	10.08	10.2	8.58	7.2	9.015	13.45	14.91	12.34	20.58	15.32	20.67	14	12.23	14.17	15.2675	24.75	15.39	15.8	10.06	16.5	9.5	9.56	6.4	8.08	8.385
CSS0001660.1	CSS0001660	0	0	0	0	0	0	0	0	0	0	0	0	0	0	0	0	0	0	0	0	0	0	0	0	0
CSS0001661.1	CSS0001661	0	0	0.65	4.03	1.17	1.25	0	0	0	0.3125	0	1.31	0.63	0	0.485	1.35	0	0.67	1.59	0.9025	0.67	0	0	0.72	0.3475
CSS0001662.1	CSS0001662	1.68	1.63	2.12	2.34	1.9425	1.01	1.74	1.93	1.37	1.5125	2.96	2.58	2.55	2.16	2.5625	1.09	1.07	1.5	2.77	1.6075	2.77	2.3	2.87	3.07	2.7525
CSS0001663.1	CSS0001663	199.28	184.19	201.58	159.78	186.208	101.87	77.98	117.46	83.44	95.1875	107.34	83.7	85.79	90.15	91.745	130.46	130.01	104.67	119.05	121.048	179.64	175.4	132.31	159.39	161.685
CSS0001664.1	CSS0001664	0.11	0	0	0.11	0.055	0	0	0	0.13	0.0325	0	0.11	0	0	0.0275	0	0	0.43	0.12	0.1375	0	0.34	0.46	0	0.2
CSS0001665.1	CSS0001665	0	0	0	0	0	0	0	0	0	0	0	0	0.13	0	0.0325	0	0	0	0	0	0	0	0.25	0	0.0625
CSS0001666.1	CSS0001666	40.45	41.45	44.48	30.04	39.105	23.89	19.65	45.15	27.19	28.97	34.5	34.34	36.12	38	35.74	28.3	35.33	37.57	88.06	47.315	68.5	47.48	56.65	62.5	58.7825
CSS0001667.1	CSS0001667	5.89	8.97	8.71	6.43	7.5	10.38	6.87	7.37	6.06	7.67	7.67	7.67	5.37	4.49	6.3	4.87	6.56	6.61	7.06	6.275	6.32	4.26	9	6.35	6.4825
CSS0001668.1	CSS0001668	0	0	0	0	0	0	0	0	0	0	0	0	0	0	0	0	0	0	0	0	0	0	0	0	0
CSS0001669.1	CSS0001669	13.11	14.35	13.62	13.98	13.765	8.31	12.39	12.61	11.33	11.16	10.1	10.82	9.1	10.55	10.1425	11.61	14.11	11.9	12.32	12.485	18.81	18.82	15.04	17.33	17.5
CSS0001670.1	CSS0001670	0.41	0.35	0.67	0.93	0.59	0.41	0.83	0.36	0.95	0.6375	1.19	0.97	0.6	0.44	0.8	0.6	0.99	0.86	0.32	0.6925	0.52	0.25	0.41	0.33	0.3775
CSS0001671.1	CSS0001671	0	0	0	0	0	0	0	0	0	0	0	0	0	0	0	0	0	0	0	0	0	0	0	0	0
CSS0001672.1	CSS0001672	0.62	1.67	1.04	1.57	1.225	0.19	1.4	0.54	0.94	0.7675	0.42	0.6	0.59	1.45	0.765	0.4	0	0.31	0.32	0.2575	1.02	0.55	0.44	1.21	0.805
CSS0001673.1	CSS0001673	4.78	7.34	9.6	2.3	6.005	9.81	11.86	3.3	6.83	7.95	9.52	8.34	6.31	15.11	9.82	5.81	8.66	6.61	5.81	6.7225	7.66	9.67	0	16.5	8.4575
CSS0001674.1	CSS0001674	1.65	2.86	2.04	2.75	2.325	1.57	3.88	2.38	2.38	2.5525	2.43	1.91	2.87	2.21	2.355	1.23	2.3	1.95	1.63	1.7775	1.61	1.64	2.16	2.13	1.885
CSS0001675.1	CSS0001675	14.64	14.28	11.1	16.63	14.1625	32.8	22.06	20.33	32.48	26.9175	15.29	14.55	14.81	14.47	14.78	31.91	24.07	22.02	8.38	21.595	5.72	5.65	6.91	7.93	6.5525
CSS0001676.1	CSS0001676	2.06	1.4	1.49	1.98	1.7325	1.27	2.04	0.65	1.06	1.255	1.58	1.12	0.83	1.71	1.31	1.6	0.96	0.97	1.57	1.275	1.27	2	2.09	1.73	1.7725
CSS0001677.1	CSS0001677	0	0	0	0	0	0	0	0	0	0	0	0	0	0	0	0	0	0	0	0	0	0	0	0	0
CSS0001678.1	CSS0001678	0.16	0.05	0.04	0.07	0.08	0.04	0.04	0.07	0.05	0.05	0.04	0.11	0.23	0.05	0.1075	0.04	0.04	0	0	0.02	0.11	0	0.09	0.08	0.07
CSS0001679.1	CSS0001679	48.1	38.6	52.22	37.93	44.2125	15.43	11.81	16.54	11.66	13.86	17.82	24.37	16.59	18.3	19.27	15.38	24.49	15.88	26.07	20.455	31.05	39.58	31.49	22.36	31.12
CSS0001680.1	CSS0001680	3.88	3.18	3.85	4.57	3.87	8.17	11.18	6.44	7.72	8.3775	6.05	10.12	8.83	12.46	9.365	10.22	9.61	9.95	5.25	8.7575	2.16	5.32	4.48	3.37	3.8325
CSS0001681.1	CSS0001681	0.47	0.59	0.56	0.42	0.51	0.35	0.28	0.06	0.65	0.335	0.47	0.37	0.37	0.1	0.3275	0.15	0	0.43	0.47	0.2625	0.28	0.21	0.41	0.25	0.2875
CSS0001682.1	CSS0001682	0	0	0	0	0	0	0	0	0	0	0	0	0	0	0	0	0	0	0	0	0	0	0	0	0
CSS0001683.1	CSS0001683	0	0	0	0	0	0	0	0	0	0	0	0	0	0	0	0	0	0	0	0	0	0	0	0	0
CSS0001684.1	CSS0001684	3.3	3.12	3	2.74	3.04	15.28	12.32	9.3	24.56	15.365	5.96	9.91	11.39	8.78	9.01	31.81	16.5	18.58	8.41	18.825	2.62	2.35	3.2	3.22	2.8475
CSS0001685.1	CSS0001685	20.19	24.11	17.55	24.81	21.665	13.17	14.9	15.4	12.34	13.9525	19.74	17.62	17.05	15.1	17.3775	16.07	20.01	15.54	11.35	15.7425	16.88	16.6	16.74	12.34	15.64
CSS0001686.1	CSS0001686	0	0	0.07	0	0.0175	0	0.14	0	0.33	0.1175	0	0.07	0	0.08	0.0375	0	0	0	0	0	0	0	0	0	0
CSS0001687.1	CSS0001687	0	0	0	0	0	0	0	0	0	0	0	0	0	0	0	0	0	0	0	0	0	0	0	0	0
CSS0001688.1	CSS0001688	0.37	1.14	2.21	1.81	1.3825	0.68	0	0.96	0	0.41	1.81	0.35	0.68	0.82	0.915	0	1.46	1.11	0.78	0.8375	0	1.09	1.53	0	0.655
CSS0001689.1	CSS0001689	0	0	0	11.73	2.9325	7.3	0	0	0	1.825	0	0	0	0	0	0	0	0	0	0	0	0	0	4.12	1.03
CSS0001690.1	CSS0001690	0	0	0	0	0	0	0	0	0	0	0	0	0	0	0	0	0	0	0	0	0	0	0	0	0
CSS0001691.1	CSS0001691	0.42	0.91	2.45	2.26	1.51	1.31	3.82	0.31	2.28	1.93	0.9	1.32	0.84	2.56	1.405	1.82	2.7	1.36	2.31	2.0475	3.21	1.83	4.46	0.99	2.6225
CSS0001692.1	CSS0001692	0	0	0	0	0	0	0	0	0	0	0	0	0	0	0	0	0	0	0	0	0	0	0	0.24	0.06
CSS0001693.1	CSS0001693	59.99	67.13	56.15	60.15	60.855	45.15	53.94	52.26	52.54	50.9725	50.49	51.81	56.62	53.44	53.09	43.17	40.98	50.25	41.92	44.08	35.35	38.5	46.58	48.58	42.2525
CSS0001694.1	CSS0001694	1.91	2.83	1.85	0.58	1.7925	0.58	0.29	0.81	1.36	0.76	3.37	1.13	2.5	1.61	2.1525	0.86	0.31	0.98	1.93	1.02	1.98	0.63	2.21	1.48	1.575
CSS0001695.1	CSS0001695	16.22	15.41	13.3	13.03	14.49	6.23	4.92	4.02	2.5	4.4175	5.79	6.13	4.75	6.86	5.8825	5.89	6.79	4.61	3.6	5.2225	6.51	7.05	6.69	8.31	7.14
CSS0001696.1	CSS0001696	0	0	0	0	0	0	0	0	0	0	0	0	0	0	0	0	0	0	0	0	0	0	0	0	0
CSS0001697.1	CSS0001697	0	0	0	0	0	0	0	0	0	0	0	0	0	0	0	0	0	0	0	0	0	0	0	0	0
CSS0001698.1	CSS0001698	1.55	2.93	2.31	2.37	2.29	1.13	1.13	1.58	0.91	1.1875	3.12	1.68	2.37	3.22	2.5975	1.1	1.66	0.94	3.54	1.81	3.09	2.11	2.28	2.43	2.4775
CSS0001699.1	CSS0001699	0	0	0	0	0	0	0	0	0	0	0	0	0	0	0	0	0	0	0	0	0	0	0	0	0
CSS0001700.1	CSS0001700	0	0	0	0	0	0	0	0	0	0	0	0	0	0	0	0	0	0	0	0	0	0	0	0	0
CSS0001701.1	CSS0001701	1.38	1.14	1.06	2.42	1.5	2.04	1.33	0.72	0	1.0225	0.27	0	0.78	0.61	0.415	0.55	1.36	0.28	0.68	0.7175	0.54	1.38	0.83	0	0.6875
CSS0001702.1	CSS0001702	33.73	27.82	18.2	21.63	25.345	6.78	6.86	9.65	4.04	6.8325	8.98	8.63	6.52	7.06	7.7975	6.45	9.5	5.22	5.2	6.5925	11.61	17.55	18.75	18.78	16.6725
CSS0001703.1	CSS0001703	0	0	0	0.11	0.0275	0	0	0	0	0	0	0	0	0	0	0	0	0	0.24	0.06	0.11	0	0.11	0	0.055
CSS0001704.1	CSS0001704	18.99	41.96	33.55	17.6	28.025	84.12	114.88	43.76	0	60.69	52.45	106.75	111.01	45.91	79.03	17.73	0	0	64.9	20.6575	36.99	35.34	0	19.05	22.845
CSS0001705.1	CSS0001705	0.81	1.12	1.14	0.87	0.985	0.9	0.91	0.87	1.57	1.0625	1.41	1.47	1.47	1.32	1.4175	0.97	1.35	1.41	0.88	1.1525	1.2	0.98	0.73	0.66	0.8925
CSS0001706.1	CSS0001706	150.62	153.44	163.76	146.39	153.553	145.22	134.02	142.16	135.68	139.27	151.05	154.64	147.26	166.89	154.96	155.43	163.32	159.73	184.31	165.697	179.56	172.32	156.75	152.93	165.39
CSS0001707.1	CSS0001707	0	0.48	0	0	0.12	0.43	0	0	0	0.1075	0	0	0	0	0	0	0.46	0	0	0.115	0	0	0	0	0
CSS0001708.1	CSS0001708	0	0	0	0	0	0	0	0	0	0	0	0	0	0	0	0	0	0	0	0	0	0	0	0	0
CSS0001709.1	CSS0001709	3.28	3.87	3.75	3.44	3.585	1.78	2.69	2.19	3.15	2.4525	3.42	2.48	3.69	3.02	3.1525	2.03	2.78	2.99	3.03	2.7075	3.41	3.83	3.44	3.09	3.4425
CSS0001710.1	CSS0001710	433.92	396.12	378.25	362.83	392.78	255.37	249.1	277.83	235.51	254.452	304.95	312.15	269.51	298.99	296.4	256.61	290.36	285.6	275.16	276.933	398.38	375.13	377.51	406.17	389.298
CSS0001711.1	CSS0001711	0	0	0	0	0	0	0	0	0	0	0	0	0	0	0	0	0	0	0	0	0	0	0	0	0
CSS0001712.1	CSS0001712	68.86	65.43	60.25	69.66	66.05	27.59	17.29	24.99	14.55	21.105	37.46	26.98	22.55	26.38	28.3425	24.09	30.8	19.11	22.37	24.0925	44.12	48.92	44.41	40.86	44.5775
CSS0001713.1	CSS0001713	1.84	2.19	2.16	2.41	2.15	1.03	2.41	1.32	2.18	1.735	1.17	1.38	1.11	1.67	1.3325	0.25	1.18	0.73	0.48	0.66	0.96	0.91	1.71	2	1.395
CSS0001714.1	CSS0001714	0	0.08	0	0	0.02	0	0.1	0	0	0.025	0	0.28	0	0	0.07	0	0	0	0	0	0.08	0.19	0	0	0.0675
CSS0001715.1	CSS0001715	0	0	0	0	0	0	0	0	0	0	0	0	0	0	0	0	0	0	0	0	0	0	0	0	0
CSS0001716.1	CSS0001716	0	0	0	0	0	0	0	0	0	0	0	0	0	0	0	0	0	0	0	0	0	0	0	0	0
CSS0001717.1	CSS0001717	1.32	0.92	1.69	0.86	1.1975	0	0.29	1.52	0.49	0.575	0.61	1.68	0	1.49	0.945	0.87	0.86	0	0.47	0.55	0	1.32	0.45	2.62	1.0975
CSS0001718.1	CSS0001718	0	0	0	0	0	0	0	0	0	0	0	0	0	0	0	0	0	0	0	0	0	0	0	0	0
CSS0001719.1	CSS0001719	0.55	0	0	0	0.1375	0	0	0	0	0	0	0	0	0	0	0	0	0	0	0	0	0	0	0	0
CSS0001720.1	CSS0001720	29.71	28.86	28.3	24.9	27.9425	39.02	35.21	24.29	33.91	33.1075	26.71	31.19	25.5	27.03	27.6075	31.1	23.99	26.81	36.24	29.535	26.12	22.23	30.14	23.06	25.3875
CSS0001721.1	CSS0001721	21.86	20.5	20.92	23.86	21.785	7.96	4.44	7.06	6.18	6.41	5.06	6.6	5	3.98	5.16	3.76	6.39	7.38	4.61	5.535	7.82	9.53	9.02	7.96	8.5825
CSS0001722.1	CSS0001722	0	0	0	0	0	0	0	0	0	0	0	0	0	0	0	0	0	0	0	0	0	0	0	0	0
CSS0001723.1	CSS0001723	1.25	9.81	4.75	0.61	4.105	0	1.18	0.53	1.37	0.77	1.78	4.16	2.86	2.11	2.7275	1.85	0	1.83	3.34	1.755	2.44	0.62	2.57	3.11	2.185
CSS0001724.1	CSS0001724	0	0	0	0	0	0	0	0	0	0	0	0	0	0	0	0	0	0	0	0	0	0	0	0	0
CSS0001725.1	CSS0001725	55.21	66.32	70.01	55.11	61.6625	21.49	26.46	38.84	16.23	25.755	36.3	29.21	32.07	31.22	32.2	25.94	30.58	29.1	50.15	33.9425	46.27	53.12	33.3	45.96	44.6625
CSS0001726.1	CSS0001726	53.9	49.84	46.13	51.51	50.345	31.03	29.78	47.3	40.68	37.1975	62.97	55.82	61.16	55.41	58.84	27.1	32.58	46	46.98	38.165	40.81	42.36	50.82	39.88	43.4675
CSS0001727.1	CSS0001727	6.83	7.76	7.56	7.68	7.4575	7.96	8.9	5.49	7.32	7.4175	8.28	6.87	6.29	8.39	7.4575	8.13	6.42	8.46	7.3	7.5775	8.41	8.02	7.82	6.99	7.81
CSS0001728.1	CSS0001728	0	0	0	0	0	0	0	0	0	0	0	0	0	0	0	0	0	0	0	0	0	0	0	0	0
CSS0001729.1	CSS0001729	0	0	0	0	0	0	0	0.09	0.11	0.05	0	0	0	0	0	0.2	0.05	0	0	0.0625	0	0	0	0	0
CSS0001730.1	CSS0001730	3.72	3.55	4.97	2.19	3.6075	1.71	1.79	4.24	1.52	2.315	2.21	1.64	2.51	1.28	1.91	2.49	3.22	1.33	6.76	3.45	4.92	3.83	2.16	4.17	3.77
CSS0001731.1	CSS0001731	0	0	0.8	0	0.2	0	0	0	0	0	0	0	0	0	0	0	0	0	0	0	0	0	0	0	0
CSS0001732.1	CSS0001732	5.15	3.16	4.1	3.05	3.865	1.78	3.84	5.23	0.78	2.9075	4.33	1.43	1.5	2.59	2.4625	2.17	1.52	1.59	3.38	2.165	4.08	3.29	4.59	4.63	4.1475
CSS0001733.1	CSS0001733	0	0.12	0	0.45	0.1425	0	0	0	0	0	0.11	0	0	0	0.0275	0	0.22	0	0	0.055	0	0	0	0.22	0.055
CSS0001734.1	CSS0001734	0	0	0	0	0	0	0	0	0	0	0	0	0	0	0	0	0	0	0	0	0	0	0	0	0
CSS0001735.1	CSS0001735	0	0	0.55	0.56	0.2775	0	0	0.17	0.01	0.045	0.18	0.18	0	0	0.09	0.37	0	0.56	0.4	0.3325	0	0	0	0.54	0.135
CSS0001736.1	CSS0001736	0	0.12	0	0	0.03	0	0.44	0.33	0.78	0.3875	0.22	0.77	0	0.25	0.31	0	0.23	0	0	0.0575	0.44	0	0.12	0	0.14
CSS0001737.1	CSS0001737	0	0.03	0	0	0.0075	0	0	0	0	0	0	0	0.02	0	0.005	0	0	0	0	0	0	0.03	0.05	0	0.02
CSS0001738.1	CSS0001738	0.64	0.29	0.32	0.46	0.4275	0.67	0.41	0.52	0.54	0.535	0.09	0.51	0.23	0.69	0.38	0.23	0.16	0.28	0.43	0.275	0.44	1	0.58	0.21	0.5575
CSS0001739.1	CSS0001739	10.56	13.21	14.28	10.59	12.16	10.72	9.82	9.08	9.58	9.8	10.35	10.34	10.48	10.79	10.49	8.61	7.02	10.86	10.8	9.3225	11.28	8.73	11.81	11.23	10.7625
CSS0001740.1	CSS0001740	303.73	327.61	430.9	333.77	349.002	479.21	364.34	553.55	376	443.275	482.71	367.29	468.76	409.27	432.007	426.27	511.16	546.27	696.38	545.02	689.72	535.46	403.89	600.12	557.298
CSS0001741.1	CSS0001741	31.37	43.71	49.95	31.02	39.0125	15.84	16.62	41.78	13.73	21.9925	30.67	24.64	25.95	21.89	25.7875	18.76	26.9	25.76	49.89	30.3275	47.61	41.32	35	42.74	41.6675
CSS0001742.1	CSS0001742	19.39	20.99	19.99	20.57	20.235	14.67	20.8	15.83	16.62	16.98	20.1	19.14	20.59	22.25	20.52	14.42	16.71	18.9	19.5	17.3825	20.24	19.17	20.45	21.17	20.2575
CSS0001743.1	CSS0001743	121.96	121.33	124.07	117.98	121.335	93.34	109.91	109.38	85.26	99.4725	109.73	102.73	94.63	118.67	106.44	105.73	109.61	105.43	138.7	114.867	142.31	135.05	130.34	136.04	135.935
CSS0001744.1	CSS0001744	0.51	0.69	0.16	0.33	0.4225	1.1	0.5	0.23	0.59	0.605	0.25	0.33	0.24	0.92	0.435	0.17	0.5	0.69	0.26	0.405	0.49	0.34	0.25	0.65	0.4325
CSS0001745.1	CSS0001745	0	1.41	1.08	0.41	0.725	0.52	0.27	0.86	0.32	0.4925	0.4	0.27	0.26	0.91	0.46	0.14	0.95	0	1.15	0.56	0.27	1.12	0.56	1.21	0.79
CSS0001746.1	CSS0001746	6.85	3.71	3.04	3.67	4.3175	4.37	2.58	2.34	4.58	3.4675	1.86	1.16	2.98	0.79	1.6975	3.97	2.13	1.58	1.5	2.295	2.44	2.55	2.9	4.2	3.0225
CSS0001747.1	CSS0001747	0	0	0	0	0	0	0	0	0	0	0	0	0	0	0	0	0	0	0	0	0	0	0	0	0
CSS0001748.1	CSS0001748	2.87	1.79	3.1	1.23	2.2475	28.27	27.45	6.54	33.82	24.02	10.98	13.14	9.03	21.86	13.7525	32.5	22.04	26.27	21.8	25.6525	1.26	2.33	2.93	0.6	1.78
CSS0001749.1	CSS0001749	0	0	0	0	0	0	0	0	0	0	0	0	0	0	0	0	0	0	0	0	0	0	0	0	0
CSS0001750.1	CSS0001750	0	1.15	0	2.12	0.8175	5.91	10.09	3.64	2.32	5.49	4.1	6.17	3.9	8.72	5.7225	3.18	3.18	2.09	7.07	3.88	1.06	4.25	2.26	0	1.8925
CSS0001751.1	CSS0001751	0	0	0	0	0	0	0	0	0	0	0	0	0	0	0	0	0	0	0	0	0	0	0	0	0
CSS0001752.1	CSS0001752	12.32	12.26	13.19	14.58	13.0875	10.85	13.07	12.54	10.46	11.73	12.3	11.43	11.33	13.29	12.0875	10.12	13.34	12.85	12.16	12.1175	12.76	14.13	13.28	13.28	13.3625
CSS0001753.1	CSS0001753	8.49	8.95	8	9.5	8.735	10.3	11.61	9.78	11.13	10.705	12.14	12.37	12.41	11.76	12.17	11.07	10.35	10.92	9.65	10.4975	9.3	10.38	8.75	9.09	9.38
CSS0001754.2	CSS0001754	8.19	6.56	5.68	7.37	6.95	4.16	7.6	6.42	5.34	5.88	4.96	4.96	6.68	7.03	5.9075	4.31	6.09	6.62	6.54	5.89	6.36	6.31	8.05	7.13	6.9625
CSS0001755.1	CSS0001755	1.16	1.56	1.76	0.93	1.3525	1.22	0.71	1.42	0.5	0.9625	1.96	2.03	0.97	1.5	1.615	0.8	1.71	0.95	3.3	1.69	1.96	2.78	1.23	1.96	1.9825
CSS0001756.1	CSS0001756	0	0	0	0	0	0	0	0	0	0	0	0	0	0	0	0	0	0	0	0	0	0	0	0	0
CSS0001757.1	CSS0001757	0	0	0	0	0	0	0	0	0	0	0	0	0	0	0	0	0	0	0	0	0	0	0	0	0
CSS0001758.1	CSS0001758	37.34	33.79	33.62	34.08	34.7075	27.73	35.43	26.23	26.89	29.07	30.94	30.55	27.8	32.02	30.3275	29.32	30.15	30.5	35.05	31.255	32.37	31.62	36.5	41.17	35.415
CSS0001759.1	CSS0001759	10.6	13.21	11.53	11.1	11.61	7.57	11.58	11.45	12.9	10.875	11.27	11.79	13.75	12.36	12.2925	10.64	11.83	13.69	17.42	13.395	15.37	13.86	15.05	13.97	14.5625
CSS0001760.1	CSS0001760	1.23	1.32	1.85	1.21	1.4025	12.08	9.25	1.19	8.48	7.75	2.24	2.63	2.02	5.03	2.98	10.35	3.03	4.75	2.28	5.1025	0.3	1.66	1.74	0.45	1.0375
CSS0001761.1	CSS0001761	0	0	0	0	0	0	0	0.48	0	0.12	0	0	0	0	0	0	0	0	0	0	0	0	0	0	0
CSS0001762.1	CSS0001762	0	0	0	0	0	0	0	0	0	0	0	0	0	0	0	0	0	0	0	0	0	0	0	0	0
CSS0001763.1	CSS0001763	2501.12	3555.23	2937.13	3456.66	3112.53	981.62	1543.39	1301.76	1157.38	1246.04	3037.46	2542.22	2196.79	2181.38	2489.46	993.52	867.85	1402.8	1631.99	1224.04	3104.78	2831.13	3527.29	2352.32	2953.88
CSS0001764.1	CSS0001764	0.62	1.08	0.71	0.39	0.7	0.64	0.43	0.39	0.51	0.4925	0.7	0.53	0.77	1.3	0.825	0.47	0.36	0.41	1.35	0.6475	0.59	0.55	0.69	0.63	0.615
CSS0001765.1	CSS0001765	0	0.2	0	0	0.05	0.03	0	0	0.22	0.0625	0	0.19	0	0.21	0.1	0	0	0.2	0.2	0.1	0.18	0	0	0	0.045
CSS0001766.1	CSS0001766	0	0	0	0	0	0	0	0	0	0	0	0	0	0	0	0	0	0	0	0	0	0	0	0	0
CSS0001767.1	CSS0001767	43.3	43.66	43.39	43.05	43.35	41.57	33.64	30.39	29.56	33.79	42.05	36.13	31.5	36.79	36.6175	38.85	39.02	33.73	35.85	36.8625	58.16	55.4	40.79	43.59	49.485
CSS0001768.1	CSS0001768	0	0	0	0	0	0	0	0	0	0	0	0	0	0	0	0	0	0	0	0	0	0	0	0	0
CSS0001769.1	CSS0001769	0.06	0.23	0.06	0.22	0.1425	0	0.06	0	0	0.015	0.05	0	0	0	0.0125	0.06	0.17	0	0.23	0.115	0.05	0.06	0.34	0.05	0.125
CSS0001770.1	CSS0001770	0.15	0.04	0.07	0.12	0.095	0.05	0.11	0	0.02	0.045	0.11	0.16	0	0.04	0.0775	0.05	0.02	0.12	0.16	0.0875	0.02	0.07	0.08	0	0.0425
CSS0001771.1	CSS0001771	5.74	7.77	7.12	5.29	6.48	4.5	2.44	3.16	4.52	3.655	3.8	3.97	6.97	2.76	4.375	6.45	7.06	5.23	4.87	5.9025	5.03	3.25	6.14	5.59	5.0025
CSS0001772.1	CSS0001772	660.37	647.98	539.84	780.58	657.192	482.92	537.06	487.27	424.71	482.99	337.16	707.25	510.89	645.36	550.165	350.24	429.44	389.8	204.32	343.45	271.09	290.87	652.35	606.67	455.245
CSS0001773.1	CSS0001773	0	0	0	0	0	0	0	0	0	0	0	0	0	0	0	0	0	0	0	0	0	0	0	0	0
CSS0001774.1	CSS0001774	0.32	1.08	0.39	0.55	0.585	0.08	0.39	0.29	0.37	0.2825	0	0	0	0	0	0	0.16	0	0.08	0.06	0.23	0.24	0.4	0	0.2175
CSS0001775.1	CSS0001775	0	0	0	0.06	0.015	0	0	0	0	0	0	0	0	0	0	0.13	0	0	0	0.0325	0	0	0	0.06	0.015
CSS0001776.1	CSS0001776	0.65	1.03	0	0.96	0.66	0.6	0.93	0.84	0.36	0.6825	0.31	0.93	0	1.85	0.7725	0.97	0.64	1.92	0.7	1.0575	0.32	1.29	2.36	0.65	1.155
CSS0001777.1	CSS0001777	38.05	36.86	34.04	36.39	36.335	45.27	43.76	35.47	41.71	41.5525	42.87	37.86	34.06	42.78	39.3925	52.14	48.65	43.45	38.18	45.605	36.86	39.64	34.8	37	37.075
CSS0001778.1	CSS0001778	49.42	55.49	55.34	51.04	52.8225	43.08	53.93	52.03	47.77	49.2025	56.88	52.24	58.29	56.76	56.0425	42	48.68	50.08	64.31	51.2675	59.58	58.24	58.32	58.78	58.73
CSS0001779.1	CSS0001779	22.47	22.76	20.7	19.89	21.455	12.14	10.23	10.03	8.29	10.1725	14.59	13.55	11.37	13.99	13.375	10.77	15.03	9.89	8.26	10.9875	21.65	24.08	16.3	17.62	19.9125
CSS0001780.1	CSS0001780	90.05	86.92	73.59	86.66	84.305	62.81	72.83	76.55	71.95	71.035	66.58	74.62	68.86	52.05	65.5275	79.54	79.49	73.53	49.24	70.45	75.64	84.28	67.54	72.4	74.965
CSS0001781.1	CSS0001781	0	0	0	0	0	0	0	0	0	0	0	0	0	0	0	0	0	0	0	0	0	0	0	0	0
CSS0001782.1	CSS0001782	0.23	0	0	0.07	0.075	0	0.07	0.2	0.09	0.09	0	0.07	0.14	0.08	0.0725	0.08	0	0	0	0.02	0.07	0.15	0.15	0	0.0925
CSS0001783.1	CSS0001783	18.65	15.22	17.6	18.51	17.495	9.63	14.69	9.21	10.7	11.0575	13.56	15.82	10.57	12.11	13.015	11.7	13.15	11.86	12.45	12.29	13.35	21.18	19.55	17.52	17.9
CSS0001784.1	CSS0001784	0	0	0	0	0	0	0	0	0	0	0	0	0	0	0	0	0	0	0	0	0	0	0	0	0
CSS0001785.1	CSS0001785	0	0	0	0	0	1.05	0	0	0	0.2625	0	0	0	1.34	0.335	0	0	0	0	0	0	0	0	0	0
CSS0001786.1	CSS0001786	2.13	2.88	2.42	2	2.3575	1.97	1.05	2.14	1.53	1.6725	2.87	1.74	1.59	2.86	2.265	1.78	1.39	1.35	2.84	1.84	1.8	1.54	1.61	1.03	1.495
CSS0001787.1	CSS0001787	0	0	0	0	0	0	0	0	0	0	0	0	0	0	0	0	0	0	0	0	0	0.62	0	0	0.155
CSS0001788.1	CSS0001788	0	0	0	0	0	0	0	0	0	0	0	0	0	0	0	0	0	0	0	0	0	0	0	0	0
CSS0001789.1	CSS0001789	5.19	6.64	6.36	5.22	5.8525	2.43	5.04	3.6	3.32	3.5975	4.66	4.53	4.6	6.12	4.9775	2.4	2.61	2.61	3.77	2.8475	6.36	5.1	5.77	6.12	5.8375
CSS0001790.1	CSS0001790	4.07	6.04	2.44	5.65	4.55	9.48	10.16	8.06	34.7	15.6	6.71	12.48	13.59	9.3	10.52	15.58	7.66	10.9	10.83	11.2425	7.64	4.47	12.61	4.88	7.4
CSS0001791.1	CSS0001791	0.64	0.5	0.42	1.06	0.655	0.9	1.21	0.67	0.87	0.9125	1.3	0.83	1.24	1.52	1.2225	0.7	0.63	0.93	1.11	0.8425	1.09	0.22	0.8	0.57	0.67
CSS0001792.1	CSS0001792	0	0	0	0	0	0	0	0	0	0	0	0	0	0	0	0	0	0	0	0	0	0	0	0	0
CSS0001793.1	CSS0001793	0.58	1.2	0.28	0.93	0.7475	0.27	0.71	0.78	0.25	0.5025	0.35	0.28	0.35	0.95	0.4825	0.07	0.5	0.15	0.83	0.3875	1.48	2.28	1.75	1.69	1.8
CSS0001794.1	CSS0001794	2.54	4.52	2.63	2.4	3.0225	1.09	0.89	2.1	1.15	1.3075	1.74	2.92	2.18	2.64	2.37	1.14	0.91	1.04	2.28	1.3425	2.43	3.29	3.25	3.29	3.065
CSS0001795.1	CSS0001795	11.67	12.61	13.11	11.18	12.1425	13.17	9.86	9.47	10.98	10.87	10.78	12.55	9.91	11.65	11.2225	13.36	13.62	10.69	10.13	11.95	14.85	13	10.27	9.19	11.8275
CSS0001796.1	CSS0001796	304	367.64	399.61	293.15	341.1	254.3	146.86	203.94	156.12	190.305	390.2	339.55	282.18	332.5	336.108	331.22	233.08	217.42	269.4	262.78	432.75	367.7	265.49	293.33	339.817
CSS0001797.1	CSS0001797	0	0	0	0	0	0	0	0	0	0	0	0	0	0	0	0	0	0	0	0	0	0	0	0	0
CSS0001798.1	CSS0001798	15.24	17.18	18.25	12.41	15.77	10.64	9.22	11.75	8.03	9.91	22.33	16.1	18.16	20.57	19.29	10.13	11.91	12.35	26.52	15.2275	17.41	15.1	20.97	18.38	17.965
CSS0001799.1	CSS0001799	0	0.37	0.17	0.29	0.2075	0.11	0.12	0.11	0	0.085	0.06	0.06	0	0	0.03	0.12	0.12	0	0.06	0.075	0.29	1.08	0.24	0.17	0.445
CSS0001800.1	CSS0001800	36.8	42.72	44.81	42.76	41.7725	37.68	45.35	42.7	49.24	43.7425	32.26	39.33	45.16	39.4	39.0375	31.58	44.61	45.61	45.69	41.8725	36.43	40.65	45.79	41.71	41.145
CSS0001801.1	CSS0001801	0	0	0	0	0	0	0	0	0	0	0	0	0	0	0	0	0	0	0	0	0	0	0	0	0
CSS0001802.1	CSS0001802	0	0	0	0.2	0.05	0	0.1	0	0	0.025	0	0.2	0	0	0.05	0	0	0	0	0	0	0	0.1	0.1	0.05
CSS0001803.1	CSS0001803	1.35	1.03	1.09	1.27	1.185	0	0.07	0	0	0.0175	0	0	0	0.12	0.03	0	0.59	0	0.23	0.205	1.02	1	1.29	0.58	0.9725
CSS0001804.1	CSS0001804	0.3	0	0	0	0.075	0.14	0	0.26	0	0.1	0.58	0	0.71	0.16	0.3625	0.15	0	0.15	0	0.075	0	0.3	0	0	0.075
CSS0001805.1	CSS0001805	0.95	0.49	0.54	0.35	0.5825	0.78	0.55	0.57	0.6	0.625	0.54	0.58	0.69	0.87	0.67	0.32	0.35	0.36	0.9	0.4825	1	0.64	0.52	1.23	0.8475
CSS0001806.1	CSS0001806	1.45	0.91	0.63	3.21	1.55	0.77	0	0	0	0.1925	0.42	0.84	0	0	0.315	0	0	0	0	0	0	1.73	0	0.76	0.6225
CSS0001807.1	CSS0001807	0	0	0	0	0	0	0	0	0	0	0	0	0	0	0	0	0	0	0	0	0	0	0	0	0
CSS0001808.2	CSS0001808	8.78	12.19	11.32	9.65	10.485	11.05	12.92	13.81	12.6	12.595	10.71	10.55	10.39	10.76	10.6025	18.54	15.86	14.25	14	15.6625	15.53	12.76	12.08	12.81	13.295
CSS0001809.1	CSS0001809	9.92	12.23	10.4	9.28	10.4575	13.25	16.32	23.32	22.75	18.91	17.19	17.66	23.42	16.66	18.7325	17.94	21.27	20.5	16.84	19.1375	13.83	15.31	14.17	13.21	14.13
CSS0001810.1	CSS0001810	13.34	19.5	15.06	12.31	15.0525	11.77	11.5	10.45	13.35	11.7675	11.17	13	11.14	13.69	12.25	8.95	13.14	13.98	12.14	12.0525	11.75	13.22	13.99	12.15	12.7775
CSS0001811.1	CSS0001811	0	0	0	0	0	0	5	0	0	1.25	0	0	0	0	0	0	0	0	0	0	0	0	0	0	0
CSS0001812.1	CSS0001812	0	0	0	0	0	0	0	0	0	0	0	0	0	0	0	0	0	0	0	0	0.36	0	0.37	0	0.1825
CSS0001813.1	CSS0001813	77.46	82.67	84.77	81.31	81.5525	44.82	17.2	55.16	22.45	34.9075	90.53	55.49	75.83	51.82	68.4175	35.24	53.34	35.6	73.85	49.5075	104.34	91.04	85.09	87.78	92.0625
CSS0001814.1	CSS0001814	0	0.19	0.76	0	0.2375	0	0.13	0.57	0	0.175	0	0.38	0	0.22	0.15	0	0.19	0	0	0.0475	0	0	0	0	0
CSS0001815.1	CSS0001815	12.64	9.95	5.99	5.53	8.5275	7.12	6.84	6.9	10.73	7.8975	9.29	8.33	7.71	6.43	7.94	9.92	7.89	18.32	11.1	11.8075	7.62	9.75	10.95	11.17	9.8725
CSS0001816.1	CSS0001816	0	0.14	0	0.3	0.11	0	0.45	0.09	0	0.135	0.07	0	0	0.1	0.0425	0	0	0.1	0	0.025	0.22	0.17	0.09	0	0.12
CSS0001817.1	CSS0001817	2.33	2.95	2.5	2.04	2.455	0.72	0.75	1.36	0.29	0.78	1.99	1.49	1.22	1.14	1.46	1.29	0.51	0.26	1.36	0.855	4.52	1.82	2.62	0.51	2.3675
CSS0001818.1	CSS0001818	0	0	0	0	0	0	0	0	0	0	0	0	0	0	0	0	0	0	0	0	0	0	0	0	0
CSS0001819.1	CSS0001819	7.99	8.74	7.32	7.23	7.82	4.81	5.09	4.22	3.97	4.5225	7.08	4.58	5.39	5.23	5.57	5.89	4.33	4.32	4.81	4.8375	7.97	6.86	6.92	6.29	7.01
CSS0001820.1	CSS0001820	0	0	0	0	0	0	0	0	0.08	0.02	0	0	0	0	0	0	0	0	0	0	0	0	0	0	0
CSS0001821.1	CSS0001821	0	0	0	0	0	0	0	0	0	0	0	0	0	0	0	0	0.27	0	0	0.0675	0	0	0	0	0
CSS0001822.1	CSS0001822	0	0	0	0	0	0	0	0	0	0	0	0	0	0	0	0	0	0	0	0	0	0	0	0	0
CSS0001823.1	CSS0001823	80	88.99	109.26	70.41	87.165	60.89	52.16	110.76	58.83	70.66	69.98	64.32	66.19	67.96	67.1125	64.93	76.32	70.44	121.02	83.1775	113.88	92.88	86.51	130.55	105.955
CSS0001824.1	CSS0001824	6.04	3.84	9.04	3.53	5.6125	7.65	7.82	13.08	2.57	7.78	6.82	4.57	4.32	9.72	6.3575	7.05	8.24	8.09	17.05	10.1075	5.9	4.71	8.83	4.83	6.0675
CSS0001825.1	CSS0001825	0.44	0.11	0.64	0.43	0.405	0.31	0.43	0.49	0.25	0.37	0.63	0.42	0	0.12	0.2925	0.22	0.43	0	0.11	0.19	0.42	0.55	0.22	0	0.2975
CSS0001826.1	CSS0001826	37.71	38.19	38.62	40.46	38.745	29.44	35.31	37.03	30.79	33.1425	36.57	33.11	35.77	36.86	35.5775	29.54	30.17	32.96	40.93	33.4	36.29	39.34	37.36	44.35	39.335
CSS0001827.1	CSS0001827	0	0	0	0	0	0	0	0	0	0	0	0	0	0	0	0	0	0	0	0	0	0	0	0	0
CSS0001828.1	CSS0001828	29	23.88	24.81	24.39	25.52	10.14	14.66	18.12	14.17	14.2725	19.63	12.94	15.31	11.33	14.8025	8.39	11.17	10.77	15.17	11.375	16.5	19.01	20.56	22.17	19.56
CSS0001829.1	CSS0001829	0	0	0	0	0	0	0	0	0	0	0	0	0	0	0	0	0	0	0	0	0	0	0	0	0
CSS0001830.1	CSS0001830	0	0	0	0	0	0	0	0	0	0	0	0	0	0	0	0	0	0	0	0	0	0	0	0	0
CSS0001831.1	CSS0001831	0	3.03	0	0	0.7575	0	0	2.19	0	0.5475	0	0	0	0	0	0	0	0	0	0	0	2.62	0	2.8	1.355
CSS0001832.1	CSS0001832	5.69	6.43	4.88	5.95	5.7375	3.55	5.17	4.07	3.55	4.085	4.94	5.84	4.31	5.61	5.175	5.09	5.27	3.87	6.12	5.0875	6.61	5.37	5.96	5.44	5.845
CSS0001833.1	CSS0001833	0	0	0	0	0	0	0	0	0	0	0	0	0	0	0	0	0	0	0	0	0	0	0	0	0
CSS0001834.1	CSS0001834	26.15	29.42	27.66	26.5	27.4325	24.55	19.13	20.56	11.98	19.055	24.93	22.73	16.21	23.03	21.725	25.68	26.45	16.62	21.88	22.6575	28.26	42.64	27.88	33.43	33.0525
CSS0001835.1	CSS0001835	44.38	42.74	41.3	41.96	42.595	49.94	64.67	77.87	50.75	60.8075	54.71	63.23	69.36	53.61	60.2275	47.2	62.98	65.47	93.77	67.355	56.99	45.24	56.51	58.22	54.24
CSS0001836.1	CSS0001836	135.78	110.22	71.37	96.54	103.478	27.84	11.68	28.48	6.75	18.6875	35.43	25.95	14.49	12.55	22.105	19.99	50.77	29.89	4.08	26.1825	52.71	86.37	50.71	69.45	64.81
CSS0001837.1	CSS0001837	0	0	0	0	0	0	0	0	0	0	0	0	0	0	0	0	0	0	0	0	0	0	0	0	0
CSS0001838.1	CSS0001838	0	0	0	0	0	0	0	0	0	0	0	0	0	0	0	0	0	0	0	0	0	0	0	0	0
CSS0001839.1	CSS0001839	7.15	7.21	7.66	7.04	7.265	4.3	9.28	7.24	5.14	6.49	5.75	5.32	6.66	5.06	5.6975	5.36	3.81	5.11	9.31	5.8975	5.48	7.2	10.48	5.94	7.275
CSS0001840.1	CSS0001840	26.67	26.92	24.71	21.01	24.8275	9.89	13.52	18.11	9.54	12.765	13.95	14.2	11.82	14.86	13.7075	10.33	13.09	12.4	21.61	14.3575	30.15	23.97	20.51	27.96	25.6475
CSS0001841.1	CSS0001841	6.6	9.17	6.32	11.67	8.44	12.96	6.72	11.8	7.85	9.8325	8.83	7.57	6.12	4.92	6.86	9.15	4.32	9.14	5.14	6.9375	6	5.26	6.74	7.84	6.46
CSS0001842.1	CSS0001842	1.36	2.67	2.4	2.89	2.33	2.1	2.7	2.18	1.63	2.1525	0.74	1.19	1.5	3.1	1.6325	1.85	2.28	1.71	0.97	1.7025	2.69	2.59	2.02	3.61	2.7275
CSS0001843.1	CSS0001843	0	0	0	0	0	0.27	0.28	0	0	0.1375	0	0	0	0	0	0	0	0	0.31	0.0775	0	0	0	0	0
CSS0001844.1	CSS0001844	13.43	14.93	10.28	14.5	13.285	38.71	19.65	16.25	48.39	30.75	14.54	17.96	19.5	22.51	18.6275	37.23	17.59	33.61	11.89	25.08	10.02	6.69	21.95	13.29	12.9875
CSS0001845.1	CSS0001845	4.62	5.65	4.67	3.8	4.685	2.1	1.46	3.22	1.03	1.9525	3.15	2.57	2.94	3.02	2.92	2.14	2.77	2.33	7.02	3.565	5.78	5.89	4.45	6.98	5.775
CSS0001846.1	CSS0001846	74.95	82.49	78.02	65.57	75.2575	75.69	76.12	71.5	59.41	70.68	85.23	74.34	65.12	79.15	75.96	86.82	81.66	77.49	88.58	83.6375	102.89	102.25	84.86	89.04	94.76
CSS0001847.1	CSS0001847	0	0	0	0	0	0	0	0	0	0	0	0	0	0	0	0	0	0	0	0	0	0	0	0	0
CSS0001848.1	CSS0001848	0	0	0	0	0	0	0	0	0	0	0	0	0	0	0	0	0	0	0	0	0	0	0	0	0
CSS0001849.1	CSS0001849	4.77	4.53	5.39	4.19	4.72	4.77	6.23	5.21	3.59	4.95	1.8	1.81	3.44	5.45	3.125	4.2	3.73	6.9	8.76	5.8975	5.12	3.74	4.46	4.77	4.5225
CSS0001850.1	CSS0001850	22.25	22.58	24.34	21.61	22.695	24.67	26.26	23.12	25.85	24.975	21.94	21.23	19.75	24.5	21.855	27.7	25.33	23.81	21.22	24.515	24.72	25.83	22.73	24.25	24.3825
CSS0001851.1	CSS0001851	0	0	0	0	0	0	0	0	0	0	0	0	0	0	0	0	0	0	0	0	0	0	0	0	0
CSS0001852.1	CSS0001852	71.96	71.73	73.77	80.43	74.4725	75.59	89.72	72.64	81.04	79.7475	82.2	97.9	85.51	87.99	88.4	67.05	72.76	74.26	68.74	70.7025	54.04	56.24	75.31	67.78	63.3425
CSS0001853.1	CSS0001853	5.56	5.13	4.46	4.86	5.0025	6.57	3.87	6.2	8.38	6.255	4.74	8.3	3.77	5.48	5.5725	2.15	6.99	13.25	2.93	6.33	0	0.62	0	3.04	0.915
CSS0001854.1	CSS0001854	4.72	5.29	4.08	3.65	4.435	3.71	4.68	3.97	3.25	3.9025	5.72	4.15	4.79	3.62	4.57	3.12	3.17	4.04	4.66	3.7475	4.2	3.8	5.1	5.24	4.585
CSS0001855.1	CSS0001855	0.27	0	0.28	0.3	0.2125	0	0	0.29	0.36	0.1625	0.15	0.18	0.39	0.33	0.2625	0.29	0.59	0.52	0	0.35	0	0	0.62	0.9	0.38
CSS0001856.1	CSS0001856	1.16	0.22	0.07	0.07	0.38	0.88	1.06	0.64	1.68	1.065	0.07	0.7	1.25	0.63	0.6625	0.66	0.57	1.47	0.38	0.77	0.21	0.51	0.29	0.35	0.34
CSS0001857.1	CSS0001857	0.77	0.64	0.52	0.42	0.5875	0.59	0.55	0.23	0.43	0.45	0.44	0.41	0.56	0.41	0.455	0.26	0.34	0.44	0.46	0.375	0.32	0.35	0.15	0.28	0.275
CSS0001858.1	CSS0001858	0.25	0.26	0.12	0.12	0.1875	0.35	0.36	0.22	0	0.2325	0.25	0.12	0.83	0	0.3	0.12	0.49	0.63	0	0.31	0	0	0.12	0.48	0.15
CSS0001859.1	CSS0001859	0	0.2	0	0	0.05	0	0	0	0.3	0.075	0.21	0	0	0.87	0.27	0	0	0	0	0	0.19	0	0	0	0.0475
CSS0001860.1	CSS0001860	2.1	2.12	2.73	1.49	2.11	1.51	1.84	2	1.33	1.67	1.71	1.46	1.7	2.08	1.7375	1.44	1.45	1.65	2.44	1.745	2.6	2.53	2.43	2.95	2.6275
CSS0001861.1	CSS0001861	0	0	0	0	0	0	0	0	0	0	0	0	0	0	0	0	0	0	0	0	0	0	0	0	0
CSS0001862.1	CSS0001862	6.33	7.85	5.89	6.6	6.6675	6.55	9.63	7.38	6.71	7.5675	5.38	7.91	7.18	6.83	6.825	7.55	7.52	8.06	6.49	7.405	7.33	7.95	7.52	8	7.7
CSS0001863.1	CSS0001863	428.83	461.18	473.13	444.36	451.875	385.32	390.5	439.51	397.27	403.15	441.68	456.41	477.33	418.63	448.513	377.05	486.81	455.4	580.86	475.03	583.43	541.22	483.67	574.48	545.7
CSS0001864.3	CSS0001864	16.57	15.99	16.36	17.11	16.5075	9.18	16.66	13.94	12.98	13.19	11.64	9.9	14.44	12.51	12.1225	10.12	16.27	15.21	18.6	15.05	24.64	23.97	20.23	25.76	23.65
CSS0001865.1	CSS0001865	0.45	0.3	0.22	0.22	0.2975	0.49	0.58	0.53	0.26	0.465	0.36	0.78	0.43	0.16	0.4325	0.21	0.29	1.27	0.39	0.54	0.58	0.49	0.22	0.43	0.43
CSS0001866.1	CSS0001866	13.35	12.28	9.5	13.14	12.0675	3.84	6.36	6.16	2.64	4.75	6.5	6.19	7.26	7.59	6.885	5.44	5.77	5.61	6.31	5.7825	7.87	9.42	8.92	11.37	9.395
CSS0001867.1	CSS0001867	0	0	0	0	0	0	0.31	0.05	0	0.09	0	0	0.05	0.12	0.0425	0.21	0	0.05	0.11	0.0925	0	0	0.05	0	0.0125
CSS0001868.1	CSS0001868	0	0	0	0	0	0	0	0	0	0	0	0	0	0	0	0	0	0	0	0	0	0	0	0	0
CSS0001869.1	CSS0001869	0	0	0	0	0	0	0	0	0	0	0	0	0	0	0	0	0	0	0	0	0	0	0	0	0
CSS0001870.1	CSS0001870	0	1.23	0	0.52	0.4375	0	0	0	1.2	0.3	0	0	0.39	0	0.0975	0	0	0	0	0	0.02	0	0.9	0	0.23
CSS0001871.1	CSS0001871	19.48	17.37	18.9	18.96	18.6775	13.72	16.87	18.01	15.94	16.135	14.59	18.34	17.17	18.82	17.23	14.04	12.21	14.5	15.02	13.9425	18.5	17.04	14.11	21.91	17.89
CSS0001872.1	CSS0001872	5.68	8.55	10.82	9.54	8.6475	2.26	3.56	0.87	1.68	2.0925	1.66	1.8	2.51	0.58	1.6375	0.99	2.36	1.36	1.85	1.64	3.09	3.88	5.16	3.45	3.895
CSS0001873.1	CSS0001873	14.2	13.21	13.19	12.8	13.35	12.14	19.78	16.37	23.55	17.96	11.42	17.8	24.17	17.3	17.6725	12.44	23.19	20.73	18.09	18.6125	19.13	14.08	20.07	18.51	17.9475
CSS0001874.1	CSS0001874	0.3	0.1	0.05	0.19	0.16	0	0.2	0.04	0	0.06	0	0.1	0	0	0.025	0	0	0	0	0	0.24	0.05	0.1	0	0.0975
CSS0001875.1	CSS0001875	0	0	0	0	0	0	0	0	0	0	0	0	0	0	0	0	0	0	0	0	0	0	0	0	0
CSS0001876.1	CSS0001876	0	0	0	0	0	0	0	0	0	0	0	0	0	0	0	0	0	0	0	0	0	0	0	0	0
CSS0001877.1	CSS0001877	21.23	21.1	16.06	17.27	18.915	7.94	5.92	5.62	3.36	5.71	9.58	9.49	5.2	6.94	7.8025	8.8	8.17	5.45	5.12	6.885	13.1	16.88	12.24	10.69	13.2275
CSS0001878.1	CSS0001878	0	0.19	0	0.09	0.07	0	0	0	0	0	0.18	0	0	0	0.045	0	0	0	0	0	0.09	0	0	0	0.0225
CSS0001879.1	CSS0001879	0	0	0	0	0	0	0	0	0	0	0	0	0	0	0	0	0	0	0	0	0	0	0	0	0
CSS0001880.1	CSS0001880	0	0	0	0	0	0	0	0	0	0	0	0	0	0	0	1.02	0	0	0	0.255	0	0	0	0	0
CSS0001881.1	CSS0001881	0	0	0	0	0	0	0	1.43	0	0.3575	0	0	0	0	0	0	0	0	0	0	0	0	0	0	0
CSS0001882.1	CSS0001882	0.88	0.97	0.55	0.75	0.7875	1.23	0	0.31	1.21	0.6875	0.68	0.54	0.72	0.85	0.6975	1.82	0.31	0.29	0.77	0.7975	0.32	1.16	1.04	1.24	0.94
CSS0001883.1	CSS0001883	7.57	6.01	7.16	7.27	7.0025	1	1.07	2.17	0.5	1.185	1.91	1.45	0.72	0.67	1.1875	1.21	1.79	1.28	1.54	1.455	5.04	5.13	4.63	4.65	4.8625
CSS0001884.1	CSS0001884	0	0	0	0	0	0.89	0	0.83	0	0.43	0	0	0.89	0	0.2225	0	0	0	0	0	2.88	0	1.02	0	0.975
CSS0001885.1	CSS0001885	0.49	0	0	0.23	0.18	0	0	0	0	0	0	0.7	0	0	0.175	0	0	0	0	0	0	0	0	0	0
CSS0001886.1	CSS0001886	0	0	0	0	0	0	0	0	0	0	0	0	0	0	0	0	0	0	0	0	0	0	0	0	0
CSS0001887.1	CSS0001887	0	0	0	0	0	0	0	0	0	0	0	0	0	0	0	0	0	0	0	0	0	0	0	0	0
CSS0001888.1	CSS0001888	2.06	1.42	3.34	1.35	2.0425	2.4	3.68	2.12	2.37	2.6425	3.15	2.16	1.96	2.46	2.4325	1.2	1.52	1.21	1.62	1.3875	1.5	2.42	2.25	1.34	1.8775
CSS0001889.1	CSS0001889	0	0.23	0	0	0.0575	0.07	0.15	0	0.09	0.0775	0.29	0	0	0.08	0.0925	0.07	0.22	0.23	0	0.13	0.22	0	0.07	0.07	0.09
CSS0001890.1	CSS0001890	41.49	32.94	38.82	53.95	41.8	35.43	59.4	49.5	39.59	45.98	44.92	56	69.37	65.52	58.9525	43.46	55.42	56.67	55.62	52.7925	49.49	58.57	50.96	48.8	51.955
CSS0001891.1	CSS0001891	1.44	2.19	2.12	1.72	1.8675	1.97	1.98	1.58	2.16	1.9225	2.18	2.25	2.66	2.18	2.3175	1.87	1.65	2.47	2.74	2.1825	1.36	1.57	2.23	1.84	1.75
CSS0001892.1	CSS0001892	15.59	12.73	15.68	20.42	16.105	2.74	5.34	7.42	5	5.125	6.4	5.33	8.31	4.54	6.145	1.84	6.2	3.69	10.6	5.5825	15.88	8.53	15.11	20.87	15.0975
CSS0001893.1	CSS0001893	0	0	0	0	0	0	0	0	0	0	0	0	0	0	0	0	0	0	0	0	0	0	0	0	0
CSS0001894.1	CSS0001894	0.72	0.56	0.59	0.73	0.65	0.33	0.51	0.28	0.65	0.4425	0.7	0.25	0.19	0.55	0.4225	0.16	0.16	0.58	0.35	0.3125	0.81	0.07	1.25	0.46	0.6475
CSS0001895.1	CSS0001895	81.35	81.6	72.28	72.2	76.8575	62.79	70.24	70.53	58.5	65.515	84.87	71.4	64.53	71.72	73.13	82.85	69.89	70.04	84.78	76.89	74.38	96.04	79.19	85.83	83.86
CSS0001896.1	CSS0001896	39.73	39.44	40.11	49.85	42.2825	36.71	48.5	36.41	35.97	39.3975	38.77	42.49	45.77	48.9	43.9825	25.63	37.71	35.03	45.72	36.0225	34.4	41.48	50.62	46.9	43.35
CSS0001897.1	CSS0001897	0	0	0	0	0	0	0	0	0	0	0	0	0	0	0	0	0	0	0	0	0	0	0	0	0
CSS0001898.1	CSS0001898	46.95	51.99	39.44	33.34	42.93	32.07	18.36	10.87	19.25	20.1375	67.63	53.52	33.25	72.41	56.7025	35.95	23.33	17.21	28.76	26.3125	43.94	39.29	34.65	28.18	36.515
CSS0001899.1	CSS0001899	3.82	0	0	0	0.955	0	0	0	0	0	0	0	0	0	0	0	0	0	4.25	1.0625	0	0	0	0	0
CSS0001900.1	CSS0001900	0.19	0	0	0.19	0.095	0	0	0	0	0	0	0	0	0	0	0	0	0	0.1	0.025	0.17	0	0	0	0.0425
CSS0001901.1	CSS0001901	5.75	7.38	5.67	5.1	5.975	4.08	4.56	6.1	2.41	4.2875	7.41	6.01	6.57	5.77	6.44	4.44	5.5	4.62	8.28	5.71	9.61	8.78	7.19	8.73	8.5775
CSS0001902.1	CSS0001902	0	0	0	0	0	0	0	0	0	0	0	0	0	0	0	0	0	0	0	0	0	0	0	0	0
CSS0001903.1	CSS0001903	0.18	0	0.31	0.24	0.1825	0.45	1.22	0.32	1.42	0.8525	0.15	0.29	0.54	0	0.245	0.36	0	0.74	0.25	0.3375	0.46	0.33	0.14	0	0.2325
CSS0001904.1	CSS0001904	50.73	53.17	56.97	51.44	53.0775	65.31	73.94	62.44	67.05	67.185	66.77	59.08	58.95	70.25	63.7625	82.78	70.57	73.86	62.33	72.385	56.54	60.57	56.33	62.14	58.895
CSS0001905.1	CSS0001905	0.43	0.45	0.42	0.21	0.3775	0	0.59	0.38	1.24	0.5525	0.42	0	0.82	0.24	0.37	0	0.21	0	0.23	0.11	1.26	0.22	0.66	0.42	0.64
CSS0001906.1	CSS0001906	130.08	157.17	188.79	141.19	154.308	175.91	175.74	178.4	161.03	172.77	194.25	166.44	191.19	204.03	188.977	162.55	202.22	204.32	285.41	213.625	233.22	204.3	178.82	191.19	201.882
CSS0001907.1	CSS0001907	0	0	0	0	0	0	0	0	0	0	0	0	0	0	0	0	0	0	0	0	0	0	0	0	0
CSS0001908.1	CSS0001908	0	0	0	0	0	0	0	0	0	0	0	0	0	0	0	0	0	0	0	0	0	0	0	0	0
CSS0001909.1	CSS0001909	10.5	15.56	14.54	9.94	12.635	13.06	13.96	12.55	13.03	13.15	17.47	12.05	17.92	13.75	15.2975	14.33	13.07	11.62	16.55	13.8925	9.96	10.22	12.37	11.68	11.0575
CSS0001910.1	CSS0001910	0	0	0	0	0	0	0	0	0	0	0	0	0	0	0	0	0	0	0	0	0	0	0	0	0
CSS0001911.1	CSS0001911	12.44	9.92	12.05	9.45	10.965	33.77	24.15	18.82	37.82	28.64	18.9	36.87	39.24	23.69	29.675	44.15	38.53	28.39	6.64	29.4275	20.45	30.9	26.96	21.88	25.0475
CSS0001912.1	CSS0001912	16.41	19.47	16.14	19.4	17.855	15.93	16.54	15.78	14.72	15.7425	16.4	15.62	16.57	20.52	17.2775	13.27	18.69	14.24	17.95	16.0375	16.44	17.65	17.76	16.94	17.1975
CSS0001913.1	CSS0001913	1.12	0.59	1.07	0.55	0.8325	0.51	1.59	0	0	0.525	0	0	0	2.12	0.53	1.11	1.65	0	0.6	0.84	1.09	2.23	1.15	1.11	1.395
CSS0001914.1	CSS0001914	216.9	212.94	186.12	193.93	202.473	253.7	231.23	272.35	306.6	265.97	230.28	344.22	328.35	257.12	289.993	248.3	315.7	297.23	150.26	252.873	198.86	175.62	197.51	143.01	178.75
CSS0001915.1	CSS0001915	0.36	0.47	0	0.54	0.3425	0.34	0.09	0.08	0.63	0.285	0.61	0.26	0.17	0.3	0.335	0.09	0.09	0.09	0.09	0.09	0.26	0.09	0	0.18	0.1325
CSS0001916.1	CSS0001916	0	0	0	0	0	0	0	0	0	0	0	0	0	0	0	0	0	0	0	0	0.46	0	0	0	0.115
CSS0001917.1	CSS0001917	1.35	1.06	1.35	1.65	1.3525	0.97	1.32	1.92	1.24	1.3625	1.22	1.28	1.27	1.29	1.265	1.07	1.52	0.66	2.33	1.395	2.27	1.66	1.91	2.39	2.0575
CSS0001918.1	CSS0001918	0	0	0	0	0	0	0	0	0	0	0	0	0	0	0	0	0	0	0	0	0	0	0	0	0
CSS0001919.1	CSS0001919	10.53	19.39	12.98	8.38	12.82	29.19	6.47	11.99	9.33	14.245	38.02	37.26	31.22	44.45	37.7375	33.08	16.49	14.92	11.94	19.1075	11.87	13.55	9.01	7.35	10.445
CSS0001920.1	CSS0001920	2.04	1.97	1.86	1.79	1.915	4.07	4.33	3.13	6.24	4.4425	2.41	2.94	3.64	2.71	2.925	6.99	4.51	5.19	2.98	4.9175	2.14	1.97	3.12	2.49	2.43
CSS0001921.1	CSS0001921	0	0	0	0	0	0	0	0	0	0	0	0	0	0	0	0	0	0	0	0	0	0	0	0	0
CSS0001922.1	CSS0001922	0.72	0	0.68	0	0.35	0	0.68	0	0.79	0.3675	0	0.69	0	0	0.1725	0	0	0	0.77	0.1925	0	0	1.49	0	0.3725
CSS0001923.1	CSS0001923	8.05	11.66	7.9	9.14	9.1875	3.46	5.11	4.25	6.59	4.8525	5.42	3.11	6.1	6.53	5.29	9.78	7.07	5.26	12	8.5275	16.57	7.94	9.51	12.89	11.7275
CSS0001924.1	CSS0001924	24.32	25.61	23.18	22.98	24.0225	15.67	16.63	18.2	11.71	15.5525	27.77	19.15	18.48	27.69	23.2725	13.74	18.4	16.29	24.74	18.2925	22.48	21.77	19.9	21.79	21.485
CSS0001925.1	CSS0001925	5.12	4.26	3.92	4.25	4.3875	3.94	4.04	3.39	3.04	3.6025	4.16	3.02	3.53	5.5	4.0525	2.75	3.27	3.38	5.62	3.755	5.43	5.35	4.91	4.9	5.1475
CSS0001926.1	CSS0001926	27.76	36.5	35.19	30.17	32.405	28.09	29.16	36.88	32.62	31.6875	30.84	32.89	29.73	38.54	33	31.08	36.17	33.05	34.92	33.805	40.4	31.43	32.55	26.11	32.6225
CSS0001927.1	CSS0001927	0.26	0.21	0.05	0.2	0.18	0	0.1	0.05	0.06	0.0525	0.15	0	0	0.22	0.0925	0	0.05	0.05	0.05	0.0375	0.15	0.26	0.15	0	0.14
CSS0001928.1	CSS0001928	11.54	13.28	12.56	12.04	12.355	11	13.94	11.77	11.91	12.155	11.64	12.99	11.69	13.61	12.4825	9.95	11.6	12.23	13.89	11.9175	11.56	12.79	12.67	12.12	12.285
CSS0001929.1	CSS0001929	0.72	0.98	0.68	0.97	0.8375	0.52	0.52	0.53	0.81	0.595	0.67	0.67	0.76	0.54	0.66	0.73	0.94	0.77	0.92	0.84	1.05	0.47	0.92	0.38	0.705
CSS0001930.1	CSS0001930	1.51	0.6	0.9	0.53	0.885	1.3	0.38	0.74	1.07	0.8725	0.45	1.01	0	1.27	0.6825	0.59	1.31	0.7	0.12	0.68	0.22	0.23	0.62	0.77	0.46
CSS0001931.1	CSS0001931	0.58	1.19	0.37	0.28	0.605	0.18	0.19	0.43	0.45	0.3125	0.74	0.47	0.28	0.42	0.4775	0.58	0.28	0.39	0.3	0.3875	0.56	0.29	0.48	0.47	0.45
CSS0001932.1	CSS0001932	0	0	0	0	0	0	0	0	0	0	0	0	0	0	0	0	0	7.12	0	1.78	0	0	0	0	0
CSS0001933.1	CSS0001933	0.22	0.74	0.26	0.28	0.375	0.45	0.41	0.16	0.4	0.355	0.25	0.32	0.35	0.46	0.345	0.31	0.05	0.36	0.23	0.2375	0.19	0.6	0.2	0.56	0.3875
CSS0001934.1	CSS0001934	5.48	4.17	4.34	4.44	4.6075	2.83	4.48	4.42	3.37	3.775	3.56	5.18	4.02	4.43	4.2975	2.98	4.19	3.8	3.67	3.66	3.36	5.67	5.87	4.87	4.9425
CSS0001935.1	CSS0001935	0.34	0.81	0.39	1.35	0.7225	0.71	0.37	0.95	0.53	0.64	0.37	0.53	0.43	0.08	0.3525	0.23	0.45	0.5	1.51	0.6725	0.82	0.77	1.14	0.96	0.9225
CSS0001936.1	CSS0001936	0.25	0.32	0.78	0.48	0.4575	0.4	0.48	0.49	0.79	0.54	0.59	0.18	1.06	0.4	0.5575	0.55	0.54	0.12	1.14	0.5875	1.07	0.5	0.86	0.89	0.83
CSS0001937.1	CSS0001937	7.95	7.81	7.28	6.67	7.4275	3.4	1.97	5.37	1.85	3.1475	4.21	3.86	6.07	4.95	4.7725	1.55	3.13	3.41	9.48	4.3925	7.03	5.14	6.76	10	7.2325
CSS0001938.1	CSS0001938	0	0	0	0	0	0	0	0	0	0	0	0	0	0	0	0	0	0	0	0	0	0	0	0	0
CSS0001939.1	CSS0001939	1.25	1.29	1.49	1.61	1.41	0.77	1.17	1.03	0.8	0.9425	1.18	1.02	1.04	2.19	1.3575	1.34	0.72	1.05	0.97	1.02	0.84	1.3	1.63	1.57	1.335
CSS0001940.1	CSS0001940	0	0	0	0	0	0	0	0	0	0	0	0	0	0	0	0	0	0	0	0	0	0	0	0	0
CSS0001941.1	CSS0001941	0	12.1	0	5.28	4.345	0	3.08	0	0	0.77	0	15.6	0	0	3.9	0	0	5.07	0	1.2675	0	0	0	5.58	1.395
CSS0001942.2	CSS0001942	2.44	3.01	2.3	2.56	2.5775	1.52	1.27	2.24	1.23	1.565	2.91	2.36	1.64	1.51	2.105	2.45	2.4	1.07	1.52	1.86	1.41	2.87	2.12	3.15	2.3875
CSS0001943.1	CSS0001943	0.3	0.58	0.8	0.54	0.555	0.63	0.4	0.67	0.93	0.6575	0.17	0.7	0.41	0.81	0.5225	0.77	0.43	0.75	0.64	0.6475	0.24	1.07	0.29	0.96	0.64
CSS0001944.1	CSS0001944	0	0.77	0	0.73	0.375	0.23	0	0.65	0	0.22	1.42	0	0.23	0.27	0.48	0	0.24	0.74	0.52	0.375	1.2	0.25	1	1.13	0.895
CSS0001945.1	CSS0001945	3.24	0	9.52	1.38	3.535	2.81	0	1.77	0.07	1.1625	0	5.42	5.06	6.38	4.215	0.12	5.48	4.76	0	2.59	0	0	0.04	0.27	0.0775
CSS0001946.1	CSS0001946	6.56	9.01	9.97	6.45	7.9975	7.09	4.7	6.11	5.27	5.7925	8.09	9.06	7.62	9.13	8.475	7.3	6.2	9.89	7.35	7.685	9.62	10.1	8.06	8.71	9.1225
CSS0001947.1	CSS0001947	0	0	0	0	0	0	0	0	0	0	0	0	0	0	0	0	0	0	0	0	0	0	0	0	0
CSS0001948.1	CSS0001948	0.09	0.05	0.19	0.14	0.1175	0.23	0.17	0.04	0	0.11	0	0.18	0.04	0.1	0.08	0.18	0	0.09	0.28	0.1375	0.04	0.31	0.5	0.13	0.245
CSS0001949.1	CSS0001949	5.44	5.25	5.76	5.41	5.465	12.56	12.12	8.11	10.47	10.815	14.2	14.57	12.11	18.96	14.96	13.96	9.91	11.05	7.55	10.6175	8.15	9.45	9.19	8.05	8.71
CSS0001950.1	CSS0001950	26.62	19.78	20.78	23.01	22.5475	22.09	17.89	23.54	21.67	21.2975	23.69	22.79	22.55	20.8	22.4575	19.58	20.54	21.44	24.49	21.5125	21.04	16.65	24.35	19.34	20.345
CSS0001951.1	CSS0001951	0.8	0.63	1.12	0	0.6375	0.29	1.5	0.77	1.42	0.995	1.14	0	0	0.61	0.4375	0.65	0.3	0	0	0.2375	0.74	0	0.69	0	0.3575
CSS0001952.1	CSS0001952	0	2.55	0.93	2.4	1.47	3.59	2.79	2.53	0.54	2.3625	1.4	1.4	1.36	1.1	1.315	0.97	2.4	0.96	0.52	1.2125	1.57	1.46	1.5	1.45	1.495
CSS0001953.1	CSS0001953	0.37	0.38	0.12	0	0.2175	0	0	0	0	0	0	0	0.12	0.14	0.065	0.12	0.24	0	0	0.09	0	0	0.5	0.12	0.155
CSS0001954.1	CSS0001954	10.66	12.13	10.25	15.79	12.2075	9.49	11.35	10.82	7.58	9.81	13.43	10.93	10.69	13.56	12.1525	6.27	6.71	10.53	7.52	7.7575	9.48	7.07	9.6	11.23	9.345
CSS0001955.1	CSS0001955	0	0.49	0.46	0.47	0.355	0.44	0	0.09	0	0.1325	0.12	0	0.23	0	0.0875	0.12	0	0.24	0.36	0.18	0	0.36	0	0.23	0.1475
CSS0001956.1	CSS0001956	0	0	0	0	0	0	0	0	0	0	0	0	0	0	0	0	0	0	0	0	0	0	0	0	0
CSS0001957.1	CSS0001957	55.77	54.91	56.57	47.9	53.7875	20.93	25.87	43.31	18.67	27.195	51.25	44.55	41.27	42.71	44.945	25.11	36.11	30.13	50.23	35.395	50.63	45.85	57.24	64.28	54.5
CSS0001958.1	CSS0001958	60.78	54.67	63.38	54.72	58.3875	82.44	64.66	67.44	82.21	74.1875	62.64	72.21	66.67	60.31	65.4575	84.33	73.93	81.64	71.34	77.81	65.67	49.92	45.91	55.54	54.26
CSS0001959.1	CSS0001959	141.58	163.67	157.07	132.6	148.73	146.21	110.38	151.28	112.07	129.985	150.22	132.41	137.78	121.78	135.547	124.79	113.53	134.42	158.03	132.692	173.95	180.35	135.68	137.86	156.96
CSS0001960.1	CSS0001960	71.97	48.12	48.01	46	53.525	10.93	9.25	15.23	6.06	10.3675	14.03	9.45	8.48	8.27	10.0575	9.59	16.96	12.19	5.27	11.0025	28.45	34.48	26.01	35.62	31.14
CSS0001961.1	CSS0001961	217.64	248.09	325.12	266.91	264.44	183.19	221.21	532.43	283.47	305.075	235.35	265.87	354.63	150.92	251.692	191.95	304.07	271.27	339.78	276.767	303.98	206.88	193.64	271.49	243.998
CSS0001962.1	CSS0001962	0	0	0	0	0	0	0	0	0.11	0.0275	0.1	0	0	0	0.025	0	0	0	0	0	0	0	0	0.1	0.025
CSS0001963.1	CSS0001963	15.22	16.32	14.11	15.11	15.19	15.58	17.03	15.7	16.53	16.21	13.85	14.33	12.95	13.29	13.605	13.47	15.1	14.96	13.29	14.205	14.63	15.24	15.59	17.98	15.86
CSS0001964.1	CSS0001964	0	0	0	0	0	0	0	0.15	0	0.0375	0.16	0	0	0	0.04	0	0	0.13	0	0.0325	0.08	0	0.08	0.08	0.06
CSS0001965.1	CSS0001965	0	0	0	0	0	0	0	0	0	0	0	0	0	0	0	0	0	0	0	0	0	0	0	0	0
CSS0001966.1	CSS0001966	5.09	5.23	5.27	7.47	5.765	6.41	6.16	5.03	8.06	6.415	3.83	4.45	4.87	6.88	5.0075	8.18	6.84	4.84	2.93	5.6975	4.53	4.57	3.8	3.99	4.2225
CSS0001967.1	CSS0001967	13.65	9.98	7.64	8.05	9.83	9.88	9.57	11.08	13.52	11.0125	6.49	5.1	7.86	8.59	7.01	14.28	9.62	13.98	6.01	10.9725	5.68	6.21	6.07	9.99	6.9875
CSS0001968.1	CSS0001968	280.73	284.82	278.82	293.66	284.507	130.26	165.07	165.5	103.61	141.11	185.64	184.46	172.69	172.17	178.74	110.88	156.03	120.51	192.64	145.015	273.8	260.27	267.79	246	261.965
CSS0001969.1	CSS0001969	0	0	0	0	0	0	0	0	0	0	0	0	0	0	0	0	0	0	0	0	0	0	0	0	0
CSS0001970.1	CSS0001970	10.15	8.82	9.67	8.75	9.3475	8.53	9.36	7.33	7.9	8.28	8.44	8.37	8.48	9.17	8.615	9.04	8.47	8.92	10.95	9.345	10.68	9.35	10.7	8.19	9.73
CSS0001971.1	CSS0001971	117.94	124.45	139.3	124.05	126.435	153.03	135.72	138.75	130.06	139.39	118.45	151.33	133.98	149.85	138.403	124.59	134.3	105.16	150.96	128.752	122.13	105.15	140.86	117.25	121.347
CSS0001972.1	CSS0001972	0	0	0	0	0	0	0	0	0	0	0	0	0	0	0	0	0	0	0	0	0	0	0	0	0
CSS0001973.1	CSS0001973	0	0	0.06	0.06	0.03	0	0	0	0	0	0	0	0	0	0	0	0	0.06	0	0.015	0.06	0	0	0.06	0.03
CSS0001974.1	CSS0001974	10.16	8.09	8.25	8.73	8.8075	8.61	6.57	7.86	7.28	7.58	8.51	8.29	8.35	9.09	8.56	6.29	7.41	8.22	11.85	8.4425	9.59	8.85	10.55	8.03	9.255
CSS0001975.1	CSS0001975	28.7	30.51	32.28	26.72	29.5525	26.19	28.46	26.06	24.79	26.375	22.58	23.25	23.77	20.89	22.6225	21.26	24.06	24.6	25.89	23.9525	23.97	21.89	21.3	23.72	22.72
CSS0001976.1	CSS0001976	8.84	8.64	7.95	7.65	8.27	4.71	3.84	3.09	3.79	3.8575	5.3	5.2	4.34	4.25	4.7725	6.57	6.3	3.98	4.37	5.305	5.71	6.72	7.51	5.84	6.445
CSS0001977.1	CSS0001977	0	0	0	0	0	0	0	0	0	0	0	0	0	0	0	0	0	0	0	0	0	0	0	0	0
CSS0001978.1	CSS0001978	4.47	2.95	2.92	1.26	2.9	1.94	0.65	2.17	3.51	2.0675	1.81	2.66	2.58	3.45	2.625	0.23	1.45	1.95	1.27	1.225	1.69	5.34	3.72	1.75	3.125
CSS0001979.1	CSS0001979	0.56	2.05	0.19	0.98	0.945	0	1.54	1.05	0.23	0.705	0	0.38	0.56	0.44	0.345	0.2	0.2	0	0.21	0.1525	1.54	0.6	0.4	1.94	1.12
CSS0001980.1	CSS0001980	0	0	0	0	0	0	0	0	0	0	0	0	0	0	0	0	0	0	0	0	0	0	0	0	0
CSS0001981.1	CSS0001981	14.78	0	0	0	3.695	0	0	5.7	0	1.425	0	13.85	0	0	3.4625	6.91	0	0	0	1.7275	0	13.78	0	0	3.445
CSS0001982.1	CSS0001982	6.25	3.93	2.37	3.67	4.055	3.43	5.9	0.53	3.43	3.3225	6.53	9.51	1.14	7.74	6.23	3.08	1.84	4.28	2.67	2.9675	1.22	0.62	3.21	1.24	1.5725
CSS0001983.1	CSS0001983	0	0	0	0	0	0	0	0	0	0	0	0	0	0	0	0	0	0	0	0	0	0	0	0	0
CSS0001984.1	CSS0001984	2	1.08	0.61	0.73	1.105	1.72	1.48	1.19	0.41	1.2	1.57	0.71	0.33	1.02	0.9075	1.21	0.82	1.26	1.61	1.225	0.92	3.09	1.06	0.3	1.3425
CSS0001985.1	CSS0001985	0	0	0.11	0.62	0.1825	0	0	0.09	0	0.0225	0.2	0.21	0.1	0	0.1275	0.31	0	0.22	0.21	0.185	0	0.11	0.21	0	0.08
CSS0001986.1	CSS0001986	0.13	0.09	0.13	0.13	0.12	0.21	0.09	0.04	0.05	0.0975	0.09	0.04	0	0.05	0.045	0.09	0	0	0.09	0.045	0.35	0	0.18	0.04	0.1425
CSS0001987.1	CSS0001987	0.28	0	0.27	0	0.1375	0.26	0	0	0	0.065	0	0	0	0.31	0.0775	0	0	0.18	0	0.045	0	0.83	0.58	0	0.3525
CSS0001988.1	CSS0001988	11.68	12.16	11.02	10.99	11.4625	5.97	5.46	5.96	4.06	5.3625	8.79	7.13	7.42	10.15	8.3725	4.78	6.75	5.89	6.02	5.86	10.14	10.98	10.13	9.37	10.155
CSS0001989.1	CSS0001989	3.06	0	0	0	0.765	0	0	0	0	0	0	0	0	0	0	0	0	0	0	0	0	0	0	0	0
CSS0001990.1	CSS0001990	0	0	0	0	0	0	0	0	0	0	0	0	0	0	0	0	0	0.32	0	0.08	0	0	0	0	0
CSS0001991.1	CSS0001991	20.97	23.43	19.71	20.8	21.2275	15.57	16.76	18.39	14.2	16.23	17.72	14.76	14.38	18.57	16.3575	14.21	14.6	13.57	21.19	15.8925	24.3	22.47	21.61	23.74	23.03
CSS0001992.1	CSS0001992	124.41	244.71	137.27	101.17	151.89	217.98	143.67	138.73	173.73	168.528	314.43	413.51	360.61	482.55	392.775	233.54	176.73	181.84	92.03	171.035	247.11	133.25	157.25	75.54	153.287
CSS0001993.1	CSS0001993	0	0	0	0	0	0	0	0	0	0	0	0	0	0	0	0	0	0	0	0	0	0	0	0	0
CSS0001994.1	CSS0001994	0	0	0	0	0	0	0	0	0	0	0	0	0	0	0	0	0	0	0	0	0	0	0	0	0
CSS0001995.1	CSS0001995	10.87	18.3	17.64	22.99	17.45	3.83	13.3	2.73	10.98	7.71	9.46	4.52	11.31	4.29	7.395	6.4	1.63	11	3.39	5.605	10.97	4.52	15.43	13.73	11.1625
CSS0001996.1	CSS0001996	6.64	3.83	6.54	3.27	5.07	36.62	28.71	15.49	35.65	29.1175	12.2	10.61	9.35	8.86	10.255	77.25	29.97	22.5	8.84	34.64	4.12	4.45	4.95	2.75	4.0675
CSS0001997.1	CSS0001997	36.99	36.47	43.11	32.73	37.325	28.11	39.09	34.39	23.29	31.22	37.71	38.64	36.96	32.65	36.49	29.25	32.76	33.1	33.37	32.12	32.04	22.03	35.15	35.98	31.3
CSS0001998.1	CSS0001998	35.98	56.96	41.81	50.51	46.315	77.89	105.1	73.94	86.21	85.785	52.64	96.14	74.67	77.88	75.3325	76.18	76.92	89.04	65.8	76.985	33.68	39.91	44.21	25.24	35.76
CSS0001999.1	CSS0001999	0	0	0	0	0	0	0	0	0	0	0	0	0	0	0	0	0	0	0	0	0	0	0	0	0
[truncated: 48,526 more rows]
