# Supplementary material for: Root-specific theanine metabolism and regulation at the single-cell level in tea plants (Camellia sinensis)
Source: eLife. 2024 Oct 14;13:RP95891. doi: 10.7554/eLife.95891 (PMC11473105; doi:10.7554/eLife.95891)
Supplement: Supplementary file 8. [file elife-95891-supp8.xlsx]

## Sheet: geneinfo
Transcript ID	Gene ID	Module color	Correlation with CsAlaDC	p_val
CSS0048795.1	CSS0048795	bisque4	0.596497	0.0189147
CSS0046735.1	CSS0046735	bisque4	0.596121	0.0190095
CSS0030706.1	CSS0030706	bisque4	0.592603	0.0199128
CSS0010666.1	CSS0010666	bisque4	-0.584311	0.0221718
CSS0012035.1	CSS0012035	bisque4	0.533441	0.0405748
CSS0005626.1	CSS0005626	bisque4	0.520465	0.0466961
CSS0001245.1	CSS0001245	bisque4	0.48456	0.0671708
CSS0024393.1	CSS0024393	bisque4	0.478232	0.0713599
CSS0049432.1	CSS0049432	bisque4	-0.473584	0.0745547
CSS0031045.1	CSS0031045	bisque4	0.467979	0.0785418
CSS0014242.1	CSS0014242	bisque4	0.445375	0.0961716
CSS0036777.1	CSS0036777	bisque4	0.430762	0.108949
CSS0035164.1	CSS0035164	bisque4	0.429352	0.110241
CSS0047007.1	CSS0047007	bisque4	-0.417144	0.121874
CSS0016410.1	CSS0016410	bisque4	-0.412363	0.126652
CSS0015835.1	CSS0015835	bisque4	-0.388519	0.15239
CSS0003816.1	CSS0003816	bisque4	0.387988	0.153
CSS0027490.1	CSS0027490	bisque4	0.387988	0.153
CSS0033365.1	CSS0033365	bisque4	0.382548	0.159344
CSS0011499.1	CSS0011499	bisque4	0.354321	0.195058
CSS0014817.1	CSS0014817	bisque4	0.352662	0.197305
CSS0014663.1	CSS0014663	bisque4	0.348754	0.202664
CSS0031625.1	CSS0031625	bisque4	0.332398	0.226093
CSS0006151.1	CSS0006151	bisque4	0.32216	0.241587
CSS0032000.1	CSS0032000	bisque4	0.309327	0.261914
CSS0046450.1	CSS0046450	bisque4	0.306153	0.267095
CSS0032108.1	CSS0032108	bisque4	-0.28989	0.294612
CSS0049990.1	CSS0049990	bisque4	0.283889	0.305172
CSS0013403.1	CSS0013403	bisque4	-0.26831	0.333595
CSS0007044.1	CSS0007044	bisque4	0.258939	0.35139
CSS0044830.1	CSS0044830	bisque4	0.256492	0.356123
CSS0006084.1	CSS0006084	bisque4	0.221502	0.427558
CSS0002709.2	CSS0002709	bisque4	0.201013	0.472534
CSS0010150.1	CSS0010150	bisque4	0.190815	0.495738
CSS0001070.1	CSS0001070	bisque4	0.182487	0.515075
CSS0024466.1	CSS0024466	bisque4	0.179926	0.521091
CSS0041338.1	CSS0041338	bisque4	0.163182	0.561179
CSS0026979.1	CSS0026979	bisque4	0.0507012	0.857589
CSS0001744.1	CSS0001744	bisque4	0.0281703	0.920617
CSS0041018.1	CSS0041018	black	-0.650972	0.00857845
CSS0038740.2	CSS0038740	black	0.584467	0.0221278
CSS0043084.1	CSS0043084	black	-0.568649	0.0269668
CSS0048509.1	CSS0048509	black	-0.565119	0.0281479
CSS0013877.1	CSS0013877	black	0.54081	0.037376
CSS0010873.1	CSS0010873	black	-0.539458	0.0379481
CSS0002332.2	CSS0002332	black	-0.526012	0.0440009
CSS0016648.1	CSS0016648	black	0.524345	0.0447986
CSS0010806.1	CSS0010806	black	-0.518097	0.0478824
CSS0014370.1	CSS0014370	black	-0.517853	0.0480062
CSS0019197.1	CSS0019197	black	-0.516282	0.0488073
CSS0048380.1	CSS0048380	black	0.515548	0.0491847
CSS0029258.1	CSS0029258	black	0.51392	0.0500301
CSS0015945.1	CSS0015945	black	-0.512185	0.0509426
CSS0042481.1	CSS0042481	black	0.512101	0.0509872
CSS0012557.1	CSS0012557	black	0.510468	0.0518574
CSS0017037.1	CSS0017037	black	0.502658	0.0561722
CSS0020100.1	CSS0020100	black	-0.498716	0.0584471
CSS0019526.1	CSS0019526	black	0.496679	0.0596487
CSS0035566.1	CSS0035566	black	-0.49509	0.0605978
CSS0014042.1	CSS0014042	black	-0.493704	0.0614351
CSS0016953.1	CSS0016953	black	-0.490461	0.0634274
CSS0006257.1	CSS0006257	black	0.488095	0.0649092
CSS0026003.1	CSS0026003	black	0.487045	0.0655751
CSS0002693.1	CSS0002693	black	-0.48282	0.0683044
CSS0037634.2	CSS0037634	black	-0.482628	0.0684309
CSS0011284.1	CSS0011284	black	0.47159	0.0759559
CSS0029985.1	CSS0029985	black	0.470461	0.0767579
CSS0049050.1	CSS0049050	black	-0.463175	0.0820783
CSS0022405.1	CSS0022405	black	0.457396	0.0864818
CSS0048998.1	CSS0048998	black	-0.44953	0.0927398
CSS0037301.1	CSS0037301	black	0.449421	0.0928289
CSS0002618.1	CSS0002618	black	0.44849	0.0935904
CSS0030575.1	CSS0030575	black	-0.445959	0.0956845
CSS0028015.1	CSS0028015	black	-0.445171	0.0963423
CSS0021357.1	CSS0021357	black	-0.444914	0.0965575
CSS0040520.1	CSS0040520	black	0.443607	0.0976584
CSS0028023.1	CSS0028023	black	-0.443397	0.0978363
CSS0001457.1	CSS0001457	black	0.442239	0.0988197
CSS0002208.1	CSS0002208	black	0.440979	0.0998985
CSS0035786.1	CSS0035786	black	-0.440271	0.100508
CSS0034732.1	CSS0034732	black	0.438062	0.102427
CSS0020694.1	CSS0020694	black	0.43384	0.106164
CSS0002435.1	CSS0002435	black	0.433048	0.106876
CSS0015982.1	CSS0015982	black	0.432919	0.106992
CSS0034049.1	CSS0034049	black	-0.427917	0.111567
CSS0050341.1	CSS0050341	black	-0.426995	0.112424
CSS0008710.1	CSS0008710	black	-0.426005	0.11335
CSS0040569.1	CSS0040569	black	0.425505	0.113819
CSS0029210.1	CSS0029210	black	-0.423621	0.115601
CSS0025200.1	CSS0025200	black	-0.422612	0.116564
CSS0005246.1	CSS0005246	black	-0.421648	0.117488
CSS0050433.1	CSS0050433	black	-0.420377	0.118714
CSS0004049.1	CSS0004049	black	-0.419046	0.120009
CSS0021007.1	CSS0021007	black	-0.417742	0.121286
CSS0028904.1	CSS0028904	black	-0.415935	0.123071
CSS0026628.1	CSS0026628	black	0.415858	0.123147
CSS0035450.1	CSS0035450	black	0.415067	0.123934
CSS0041880.1	CSS0041880	black	-0.414608	0.124393
CSS0025164.1	CSS0025164	black	0.413922	0.12508
CSS0024273.1	CSS0024273	black	0.413729	0.125274
CSS0032757.1	CSS0032757	black	-0.409209	0.129873
CSS0017792.1	CSS0017792	black	-0.409108	0.129977
CSS0018823.1	CSS0018823	black	-0.408382	0.130727
CSS0030755.1	CSS0030755	black	-0.406512	0.132671
CSS0020075.1	CSS0020075	black	-0.405089	0.134164
CSS0043762.1	CSS0043762	black	-0.405089	0.134164
CSS0010678.1	CSS0010678	black	-0.401307	0.138186
CSS0046013.1	CSS0046013	black	-0.396981	0.142886
CSS0016918.1	CSS0016918	black	-0.39264	0.147711
CSS0023374.1	CSS0023374	black	-0.39264	0.147711
CSS0002215.1	CSS0002215	black	0.387383	0.153697
CSS0022801.1	CSS0022801	black	-0.387075	0.154053
CSS0005655.1	CSS0005655	black	-0.386807	0.154363
CSS0028394.1	CSS0028394	black	-0.386692	0.154495
CSS0032904.1	CSS0032904	black	0.384064	0.157559
CSS0020501.1	CSS0020501	black	-0.382786	0.159063
CSS0034836.1	CSS0034836	black	0.381576	0.160496
CSS0027001.1	CSS0027001	black	0.375908	0.167322
CSS0022996.1	CSS0022996	black	-0.375625	0.167667
CSS0031869.1	CSS0031869	black	0.374627	0.168891
CSS0038715.1	CSS0038715	black	-0.373412	0.170387
CSS0019157.1	CSS0019157	black	0.372724	0.171239
CSS0045239.1	CSS0045239	black	-0.372712	0.171253
CSS0026664.1	CSS0026664	black	0.371019	0.173361
CSS0012291.2	CSS0012291	black	0.369525	0.175235
CSS0022797.1	CSS0022797	black	0.3691	0.17577
CSS0022775.1	CSS0022775	black	-0.36875	0.176212
CSS0016496.1	CSS0016496	black	0.363864	0.182455
CSS0010584.1	CSS0010584	black	0.363144	0.183386
CSS0043624.1	CSS0043624	black	-0.363057	0.183499
CSS0007771.1	CSS0007771	black	0.362817	0.183811
CSS0035112.1	CSS0035112	black	0.362298	0.184486
CSS0025444.1	CSS0025444	black	-0.361112	0.186034
CSS0049481.1	CSS0049481	black	-0.360426	0.186932
CSS0010270.1	CSS0010270	black	-0.358902	0.18894
CSS0019036.1	CSS0019036	black	-0.35536	0.193659
CSS0016315.1	CSS0016315	black	0.355347	0.193678
CSS0012844.1	CSS0012844	black	0.353931	0.195585
CSS0045460.1	CSS0045460	black	0.35366	0.195952
CSS0044340.1	CSS0044340	black	-0.353487	0.196186
CSS0027977.1	CSS0027977	black	0.351943	0.198284
CSS0013847.1	CSS0013847	black	0.351853	0.198407
CSS0021447.1	CSS0021447	black	0.350427	0.200358
CSS0015034.1	CSS0015034	black	-0.350096	0.200813
CSS0018705.1	CSS0018705	black	0.34986	0.201138
CSS0031816.1	CSS0031816	black	0.347053	0.205025
CSS0043004.1	CSS0043004	black	-0.344317	0.208859
CSS0039638.1	CSS0039638	black	0.343918	0.209422
CSS0021852.1	CSS0021852	black	0.343542	0.209954
CSS0021430.1	CSS0021430	black	0.342659	0.211205
CSS0002176.1	CSS0002176	black	0.342579	0.211319
CSS0005264.1	CSS0005264	black	0.341848	0.212358
CSS0038653.1	CSS0038653	black	0.341795	0.212434
CSS0031338.1	CSS0031338	black	0.340745	0.213934
CSS0017280.1	CSS0017280	black	-0.339393	0.215875
CSS0028105.1	CSS0028105	black	-0.339282	0.216034
CSS0045474.1	CSS0045474	black	0.337898	0.218034
CSS0021051.1	CSS0021051	black	0.337388	0.218773
CSS0034543.1	CSS0034543	black	-0.337349	0.21883
CSS0036799.1	CSS0036799	black	0.336232	0.220455
CSS0009171.1	CSS0009171	black	0.33348	0.224493
CSS0022932.1	CSS0022932	black	-0.332313	0.22622
CSS0032937.1	CSS0032937	black	0.329246	0.230796
CSS0023090.1	CSS0023090	black	0.329056	0.231081
CSS0014885.1	CSS0014885	black	0.328607	0.231756
CSS0049513.1	CSS0049513	black	0.328371	0.232111
CSS0009948.1	CSS0009948	black	0.327082	0.234059
CSS0038209.1	CSS0038209	black	-0.326893	0.234346
CSS0032405.1	CSS0032405	black	-0.325942	0.235789
CSS0005107.1	CSS0005107	black	0.32536	0.236676
CSS0018241.1	CSS0018241	black	-0.324847	0.237459
CSS0007878.1	CSS0007878	black	-0.32191	0.241974
CSS0034100.1	CSS0034100	black	-0.319594	0.245571
CSS0047220.1	CSS0047220	black	0.318217	0.247725
CSS0036366.1	CSS0036366	black	-0.318208	0.24774
CSS0006371.1	CSS0006371	black	-0.318085	0.247933
CSS0043839.1	CSS0043839	black	-0.317401	0.249008
CSS0036451.1	CSS0036451	black	0.317219	0.249294
CSS0036533.1	CSS0036533	black	0.31703	0.249591
CSS0029357.2	CSS0029357	black	0.316879	0.24983
CSS0049848.1	CSS0049848	black	0.316814	0.249932
CSS0039413.1	CSS0039413	black	0.315764	0.251592
CSS0015114.1	CSS0015114	black	-0.314335	0.253861
CSS0032967.1	CSS0032967	black	0.311788	0.257938
CSS0003239.1	CSS0003239	black	-0.311764	0.257977
CSS0008173.1	CSS0008173	black	-0.311455	0.258473
CSS0018316.1	CSS0018316	black	0.310849	0.259449
CSS0017262.1	CSS0017262	black	-0.31053	0.259965
CSS0000094.1	CSS0000094	black	0.310474	0.260055
CSS0009091.1	CSS0009091	black	-0.309833	0.261092
CSS0016563.1	CSS0016563	black	-0.309686	0.261331
CSS0045177.1	CSS0045177	black	0.308356	0.263493
CSS0035764.1	CSS0035764	black	0.306071	0.267229
CSS0031731.1	CSS0031731	black	0.305961	0.267411
CSS0043851.1	CSS0043851	black	-0.30593	0.267462
CSS0010710.1	CSS0010710	black	-0.305239	0.268599
CSS0028820.1	CSS0028820	black	-0.304047	0.270568
CSS0021849.1	CSS0021849	black	-0.303886	0.270834
CSS0007946.1	CSS0007946	black	-0.30385	0.270894
CSS0018179.1	CSS0018179	black	-0.299565	0.278048
CSS0048718.1	CSS0048718	black	0.298513	0.279821
CSS0031924.1	CSS0031924	black	0.298381	0.280045
CSS0002044.1	CSS0002044	black	0.297187	0.282067
CSS0011677.1	CSS0011677	black	0.295508	0.284925
CSS0011706.1	CSS0011706	black	0.291389	0.292009
CSS0023339.1	CSS0023339	black	-0.290255	0.293976
CSS0001610.1	CSS0001610	black	0.289877	0.294635
CSS0034605.1	CSS0034605	black	0.289748	0.29486
CSS0022648.1	CSS0022648	black	-0.289398	0.295469
CSS0041196.1	CSS0041196	black	-0.28921	0.295798
CSS0023480.1	CSS0023480	black	0.288298	0.297392
CSS0048522.1	CSS0048522	black	0.288298	0.297392
CSS0010034.1	CSS0010034	black	0.28825	0.297476
CSS0037117.1	CSS0037117	black	-0.288093	0.297751
CSS0026742.1	CSS0026742	black	-0.287319	0.29911
CSS0033265.1	CSS0033265	black	-0.287316	0.299114
CSS0039020.1	CSS0039020	black	0.28596	0.301502
CSS0025952.1	CSS0025952	black	-0.285709	0.301946
CSS0032580.1	CSS0032580	black	0.285141	0.30295
CSS0044566.1	CSS0044566	black	-0.284282	0.304474
CSS0010264.1	CSS0010264	black	0.283404	0.306034
CSS0024302.1	CSS0024302	black	0.282863	0.306997
CSS0046364.1	CSS0046364	black	0.282166	0.308243
CSS0014309.1	CSS0014309	black	-0.281914	0.308693
CSS0029613.2	CSS0029613	black	0.280314	0.311565
CSS0018972.1	CSS0018972	black	-0.278204	0.315374
CSS0045191.1	CSS0045191	black	0.278042	0.315668
CSS0045538.1	CSS0045538	black	0.277959	0.315819
CSS0012385.1	CSS0012385	black	0.277928	0.315875
CSS0050031.1	CSS0050031	black	-0.27587	0.31962
CSS0000828.1	CSS0000828	black	0.275505	0.320287
CSS0022963.1	CSS0022963	black	-0.274581	0.32198
CSS0023606.1	CSS0023606	black	0.271864	0.326983
CSS0012715.1	CSS0012715	black	0.271669	0.327343
CSS0043062.1	CSS0043062	black	0.271669	0.327343
CSS0036305.1	CSS0036305	black	0.2716	0.327473
CSS0012704.1	CSS0012704	black	-0.271438	0.327772
CSS0040085.1	CSS0040085	black	0.270708	0.329126
CSS0035564.1	CSS0035564	black	0.270446	0.329612
CSS0011304.1	CSS0011304	black	0.270316	0.329853
CSS0028406.1	CSS0028406	black	0.270275	0.32993
CSS0050260.1	CSS0050260	black	-0.270258	0.329961
CSS0039414.1	CSS0039414	black	0.26974	0.330926
CSS0023523.1	CSS0023523	black	0.269325	0.331699
CSS0008043.1	CSS0008043	black	0.268318	0.333581
CSS0038876.1	CSS0038876	black	-0.267937	0.334293
CSS0029359.1	CSS0029359	black	-0.267845	0.334466
CSS0039708.1	CSS0039708	black	-0.267103	0.335858
CSS0032188.1	CSS0032188	black	0.266111	0.337725
CSS0029522.1	CSS0029522	black	0.265903	0.338117
CSS0041966.1	CSS0041966	black	0.264117	0.341493
CSS0044360.1	CSS0044360	black	0.263759	0.342174
CSS0002346.1	CSS0002346	black	-0.263449	0.342761
CSS0033679.1	CSS0033679	black	0.261386	0.346693
CSS0010868.1	CSS0010868	black	-0.261342	0.346777
CSS0002438.1	CSS0002438	black	-0.260917	0.347591
CSS0005404.1	CSS0005404	black	0.26051	0.348371
CSS0021648.1	CSS0021648	black	-0.259639	0.350043
CSS0044272.1	CSS0044272	black	-0.25945	0.350407
CSS0033913.1	CSS0033913	black	-0.257773	0.353641
CSS0041120.1	CSS0041120	black	-0.25755	0.354073
CSS0002345.1	CSS0002345	black	-0.256313	0.356471
CSS0045804.1	CSS0045804	black	-0.25606	0.356961
CSS0006598.1	CSS0006598	black	-0.253877	0.361218
CSS0050362.2	CSS0050362	black	-0.252421	0.364073
CSS0009381.1	CSS0009381	black	0.251196	0.366483
CSS0026613.1	CSS0026613	black	-0.250772	0.367321
CSS0003856.1	CSS0003856	black	0.250417	0.368021
CSS0004916.1	CSS0004916	black	0.248705	0.371415
CSS0045593.1	CSS0045593	black	0.248553	0.371716
CSS0017621.1	CSS0017621	black	-0.247607	0.373597
CSS0044707.1	CSS0044707	black	0.247382	0.374046
CSS0050139.1	CSS0050139	black	0.246681	0.375446
CSS0021816.1	CSS0021816	black	0.246592	0.375625
CSS0026393.1	CSS0026393	black	0.246592	0.375625
CSS0033517.1	CSS0033517	black	0.245994	0.376821
CSS0034754.1	CSS0034754	black	0.244651	0.379514
CSS0009420.1	CSS0009420	black	0.244421	0.379976
CSS0001641.1	CSS0001641	black	0.243193	0.382451
CSS0044047.1	CSS0044047	black	0.243148	0.382541
CSS0047319.1	CSS0047319	black	0.242564	0.38372
CSS0037445.1	CSS0037445	black	-0.241797	0.385274
CSS0002112.1	CSS0002112	black	0.241142	0.386601
CSS0028628.1	CSS0028628	black	0.240659	0.387582
CSS0010153.1	CSS0010153	black	-0.240473	0.38796
CSS0003003.1	CSS0003003	black	-0.240431	0.388047
CSS0015513.1	CSS0015513	black	0.238874	0.391219
CSS0036102.1	CSS0036102	black	0.238664	0.391649
CSS0020013.1	CSS0020013	black	0.238549	0.391883
CSS0034101.1	CSS0034101	black	0.237515	0.394001
CSS0008668.1	CSS0008668	black	0.23737	0.394299
CSS0036540.1	CSS0036540	black	-0.237205	0.394638
CSS0013424.1	CSS0013424	black	0.236503	0.39608
CSS0015255.1	CSS0015255	black	0.236503	0.39608
CSS0022833.1	CSS0022833	black	-0.236447	0.396194
CSS0048154.1	CSS0048154	black	-0.235155	0.398855
CSS0000819.1	CSS0000819	black	-0.233851	0.401552
CSS0050028.1	CSS0050028	black	0.233205	0.402891
CSS0014014.1	CSS0014014	black	0.233181	0.402942
CSS0023589.1	CSS0023589	black	0.232093	0.405203
CSS0008632.1	CSS0008632	black	0.232091	0.405208
CSS0040870.1	CSS0040870	black	-0.230906	0.407677
CSS0049604.1	CSS0049604	black	0.23085	0.407794
CSS0040674.1	CSS0040674	black	0.230814	0.407868
CSS0038654.1	CSS0038654	black	0.230392	0.40875
CSS0008999.1	CSS0008999	black	-0.230255	0.409037
CSS0024923.1	CSS0024923	black	-0.229963	0.409648
CSS0040330.1	CSS0040330	black	0.228929	0.411816
CSS0045890.1	CSS0045890	black	0.228687	0.412323
CSS0000698.1	CSS0000698	black	0.228588	0.412531
CSS0044041.1	CSS0044041	black	0.228322	0.413091
CSS0000599.1	CSS0000599	black	0.22823	0.413283
CSS0041197.1	CSS0041197	black	-0.228225	0.413295
CSS0008050.1	CSS0008050	black	-0.227864	0.414054
CSS0040094.1	CSS0040094	black	0.227145	0.415568
CSS0045274.1	CSS0045274	black	-0.226326	0.417297
CSS0049350.1	CSS0049350	black	-0.226326	0.417297
CSS0024863.1	CSS0024863	black	-0.226109	0.417756
CSS0031646.1	CSS0031646	black	0.225924	0.418147
CSS0015152.1	CSS0015152	black	0.225512	0.419019
CSS0035150.1	CSS0035150	black	-0.22549	0.419066
CSS0049780.1	CSS0049780	black	-0.224416	0.421343
CSS0037086.1	CSS0037086	black	0.224381	0.421418
CSS0016659.1	CSS0016659	black	0.224119	0.421976
CSS0040370.1	CSS0040370	black	-0.223968	0.422296
CSS0022025.1	CSS0022025	black	0.223745	0.422771
CSS0000472.1	CSS0000472	black	0.223643	0.422987
CSS0009970.1	CSS0009970	black	0.223231	0.423864
CSS0045929.1	CSS0045929	black	0.222798	0.424788
CSS0049509.1	CSS0049509	black	-0.222623	0.425161
CSS0039141.1	CSS0039141	black	0.222621	0.425164
CSS0010345.1	CSS0010345	black	-0.222253	0.425951
CSS0010656.1	CSS0010656	black	0.221856	0.426799
CSS0004421.1	CSS0004421	black	0.221831	0.426852
CSS0017988.1	CSS0017988	black	0.221548	0.427459
CSS0015966.1	CSS0015966	black	0.220876	0.428897
CSS0035891.1	CSS0035891	black	0.220728	0.429215
CSS0045962.2	CSS0045962	black	0.220458	0.429794
CSS0044397.1	CSS0044397	black	0.219963	0.430857
CSS0003978.1	CSS0003978	black	0.219685	0.431455
CSS0029510.1	CSS0029510	black	-0.219666	0.431494
CSS0006704.1	CSS0006704	black	0.218927	0.433084
CSS0001380.1	CSS0001380	black	0.217789	0.435539
CSS0002895.1	CSS0002895	black	0.217789	0.435539
CSS0021362.1	CSS0021362	black	0.217034	0.437173
CSS0005153.1	CSS0005153	black	0.216743	0.437803
CSS0048133.1	CSS0048133	black	0.216679	0.437942
CSS0023148.1	CSS0023148	black	-0.216654	0.437996
CSS0043717.1	CSS0043717	black	-0.216353	0.438647
CSS0034826.1	CSS0034826	black	0.215853	0.439733
CSS0022748.1	CSS0022748	black	0.214983	0.441623
CSS0041145.1	CSS0041145	black	-0.214381	0.442934
CSS0019661.1	CSS0019661	black	-0.213474	0.444911
CSS0041647.2	CSS0041647	black	0.213063	0.445809
CSS0018832.1	CSS0018832	black	0.211652	0.448899
CSS0020940.2	CSS0020940	black	0.210858	0.450643
CSS0031339.1	CSS0031339	black	0.209808	0.452952
CSS0037239.1	CSS0037239	black	-0.209611	0.453386
CSS0031755.1	CSS0031755	black	0.208956	0.454832
CSS0020615.1	CSS0020615	black	0.208888	0.454982
CSS0040327.1	CSS0040327	black	0.208888	0.454982
CSS0003712.1	CSS0003712	black	0.207959	0.457036
CSS0049658.1	CSS0049658	black	0.207757	0.457481
CSS0012982.1	CSS0012982	black	-0.207729	0.457543
CSS0037404.2	CSS0037404	black	-0.207453	0.458154
CSS0006156.1	CSS0006156	black	0.206725	0.459769
CSS0035103.1	CSS0035103	black	-0.206719	0.459783
CSS0041703.1	CSS0041703	black	0.206547	0.460164
CSS0005333.1	CSS0005333	black	0.206307	0.460698
CSS0026211.1	CSS0026211	black	0.206259	0.460806
CSS0027643.1	CSS0027643	black	0.204443	0.464848
CSS0050305.1	CSS0050305	black	0.204411	0.464919
CSS0034155.1	CSS0034155	black	-0.203972	0.4659
CSS0043386.1	CSS0043386	black	-0.203346	0.4673
CSS0014202.1	CSS0014202	black	-0.20329	0.467424
CSS0004997.1	CSS0004997	black	-0.202782	0.468561
CSS0048559.1	CSS0048559	black	-0.202735	0.468667
CSS0044088.1	CSS0044088	black	0.201743	0.470892
CSS0017385.1	CSS0017385	black	-0.201359	0.471754
CSS0004058.1	CSS0004058	black	-0.201157	0.47221
CSS0019750.3	CSS0019750	black	0.201104	0.472328
CSS0048810.1	CSS0048810	black	-0.200436	0.473831
CSS0001108.1	CSS0001108	black	-0.200112	0.474561
CSS0048323.1	CSS0048323	black	-0.200112	0.474561
CSS0027387.1	CSS0027387	black	0.200033	0.474739
CSS0000343.1	CSS0000343	black	0.199615	0.475683
CSS0002610.1	CSS0002610	black	0.19939	0.476191
CSS0049296.1	CSS0049296	black	0.199347	0.476287
CSS0042820.1	CSS0042820	black	-0.198872	0.477361
CSS0043071.1	CSS0043071	black	-0.198862	0.477383
CSS0034244.1	CSS0034244	black	0.198814	0.477492
CSS0006665.1	CSS0006665	black	0.198788	0.47755
CSS0008790.1	CSS0008790	black	0.198042	0.479239
CSS0030870.1	CSS0030870	black	-0.197994	0.479347
CSS0036314.1	CSS0036314	black	-0.197888	0.479587
CSS0000121.1	CSS0000121	black	0.197653	0.48012
CSS0022346.1	CSS0022346	black	-0.197579	0.480287
CSS0038328.1	CSS0038328	black	0.19736	0.480783
CSS0037358.1	CSS0037358	black	-0.196142	0.483551
CSS0047191.1	CSS0047191	black	-0.195323	0.485414
CSS0016704.1	CSS0016704	black	-0.195205	0.485684
CSS0018420.1	CSS0018420	black	0.194365	0.4876
CSS0032315.1	CSS0032315	black	0.193955	0.488537
CSS0041959.1	CSS0041959	black	0.193766	0.488969
CSS0036362.1	CSS0036362	black	0.192813	0.491149
CSS0015222.1	CSS0015222	black	0.192562	0.491724
CSS0046264.1	CSS0046264	black	0.19256	0.491729
CSS0014841.1	CSS0014841	black	0.19198	0.49306
CSS0000739.1	CSS0000739	black	0.191853	0.493353
CSS0036878.1	CSS0036878	black	-0.19174	0.493611
CSS0035021.1	CSS0035021	black	0.191582	0.493975
CSS0038493.1	CSS0038493	black	0.190571	0.496299
CSS0001906.1	CSS0001906	black	0.18901	0.499901
CSS0049446.1	CSS0049446	black	0.188851	0.500267
CSS0015110.1	CSS0015110	black	-0.188432	0.501236
CSS0020067.1	CSS0020067	black	-0.1879	0.502467
CSS0025703.1	CSS0025703	black	0.18771	0.502908
CSS0023364.1	CSS0023364	black	0.187525	0.503337
CSS0046139.1	CSS0046139	black	0.187261	0.503948
CSS0022912.1	CSS0022912	black	-0.187137	0.504235
CSS0020221.1	CSS0020221	black	0.187008	0.504535
CSS0049799.1	CSS0049799	black	0.186999	0.504556
CSS0048412.1	CSS0048412	black	0.186921	0.504738
CSS0030171.1	CSS0030171	black	0.186787	0.505047
CSS0016367.1	CSS0016367	black	-0.186736	0.505167
CSS0022348.1	CSS0022348	black	-0.185771	0.507409
CSS0031513.1	CSS0031513	black	-0.185675	0.507632
CSS0038427.1	CSS0038427	black	0.185129	0.508904
CSS0007049.1	CSS0007049	black	-0.185043	0.509105
CSS0005717.1	CSS0005717	black	-0.184924	0.509382
CSS0014805.1	CSS0014805	black	0.184917	0.509397
CSS0037420.1	CSS0037420	black	0.184917	0.509397
CSS0041714.1	CSS0041714	black	-0.18429	0.510859
CSS0002072.1	CSS0002072	black	-0.184098	0.511307
CSS0036393.1	CSS0036393	black	0.183458	0.512803
CSS0021885.1	CSS0021885	black	-0.182773	0.514406
CSS0004280.1	CSS0004280	black	0.181772	0.516751
CSS0043297.1	CSS0043297	black	0.181525	0.517332
CSS0037355.1	CSS0037355	black	0.179849	0.521271
CSS0032892.1	CSS0032892	black	0.179788	0.521415
CSS0019207.1	CSS0019207	black	-0.179417	0.522289
CSS0026402.1	CSS0026402	black	0.178768	0.523819
CSS0000645.1	CSS0000645	black	0.178138	0.525308
CSS0006137.1	CSS0006137	black	-0.17808	0.525445
CSS0016591.1	CSS0016591	black	-0.178077	0.525452
CSS0004102.1	CSS0004102	black	0.177987	0.525666
CSS0043221.1	CSS0043221	black	-0.177985	0.52567
CSS0004549.1	CSS0004549	black	0.177534	0.526736
CSS0040497.1	CSS0040497	black	0.177387	0.527083
CSS0021516.1	CSS0021516	black	-0.176846	0.528365
CSS0039191.1	CSS0039191	black	-0.176779	0.528524
CSS0037798.1	CSS0037798	black	-0.176081	0.530179
CSS0007592.1	CSS0007592	black	-0.175628	0.531254
CSS0032847.1	CSS0032847	black	0.175532	0.531484
CSS0019345.1	CSS0019345	black	0.174666	0.533542
CSS0023383.1	CSS0023383	black	0.174569	0.533773
CSS0015343.1	CSS0015343	black	-0.174408	0.534158
CSS0018356.1	CSS0018356	black	0.174344	0.534309
CSS0001278.1	CSS0001278	black	0.174187	0.534684
CSS0041491.1	CSS0041491	black	-0.173259	0.536895
CSS0035493.1	CSS0035493	black	-0.173222	0.536984
CSS0028982.1	CSS0028982	black	-0.173027	0.53745
CSS0021261.1	CSS0021261	black	0.172858	0.537852
CSS0029551.1	CSS0029551	black	-0.172787	0.538024
CSS0021610.1	CSS0021610	black	0.172489	0.538734
CSS0015560.1	CSS0015560	black	0.172483	0.53875
CSS0049520.1	CSS0049520	black	0.172483	0.53875
CSS0046605.1	CSS0046605	black	-0.172001	0.539902
CSS0017646.1	CSS0017646	black	-0.170484	0.543538
CSS0016331.1	CSS0016331	black	-0.17032	0.543929
CSS0005387.1	CSS0005387	black	-0.169665	0.545503
CSS0048139.1	CSS0048139	black	-0.169384	0.546179
CSS0043989.1	CSS0043989	black	-0.169063	0.546952
CSS0015191.1	CSS0015191	black	0.168951	0.547221
CSS0016672.1	CSS0016672	black	-0.168737	0.547735
CSS0032205.1	CSS0032205	black	-0.168615	0.54803
CSS0045353.1	CSS0045353	black	0.168398	0.548552
CSS0044555.1	CSS0044555	black	-0.168343	0.548684
CSS0046900.1	CSS0046900	black	-0.167926	0.54969
CSS0017933.1	CSS0017933	black	-0.167258	0.551302
CSS0039631.1	CSS0039631	black	-0.167046	0.551813
CSS0045332.1	CSS0045332	black	0.165761	0.55492
CSS0033013.1	CSS0033013	black	-0.165327	0.555971
CSS0007249.1	CSS0007249	black	0.164978	0.556818
CSS0040336.1	CSS0040336	black	0.164749	0.557374
CSS0022917.1	CSS0022917	black	0.163799	0.559679
CSS0001849.1	CSS0001849	black	-0.163604	0.560153
CSS0044569.1	CSS0044569	black	-0.163604	0.560153
CSS0048893.1	CSS0048893	black	0.163388	0.56068
CSS0036844.1	CSS0036844	black	0.162581	0.562643
CSS0009448.1	CSS0009448	black	-0.162237	0.563481
CSS0035127.1	CSS0035127	black	-0.162237	0.563481
CSS0022058.1	CSS0022058	black	0.161781	0.564593
CSS0004755.1	CSS0004755	black	-0.161199	0.566013
CSS0027285.1	CSS0027285	black	0.160945	0.566634
CSS0035029.1	CSS0035029	black	0.160431	0.56789
CSS0012941.2	CSS0012941	black	0.158618	0.57233
CSS0006751.1	CSS0006751	black	-0.158282	0.573153
CSS0049635.1	CSS0049635	black	0.15765	0.574705
CSS0043457.1	CSS0043457	black	0.157258	0.575668
CSS0039483.1	CSS0039483	black	0.155919	0.578967
CSS0039699.1	CSS0039699	black	0.155657	0.579612
CSS0031774.1	CSS0031774	black	0.154809	0.581703
CSS0003713.1	CSS0003713	black	-0.154692	0.581993
CSS0043393.1	CSS0043393	black	-0.154692	0.581993
CSS0015765.1	CSS0015765	black	-0.154531	0.582391
CSS0036484.1	CSS0036484	black	-0.153809	0.584177
CSS0049802.1	CSS0049802	black	-0.153405	0.585176
CSS0032500.1	CSS0032500	black	-0.1531	0.585931
CSS0035818.1	CSS0035818	black	0.153018	0.586133
CSS0027266.1	CSS0027266	black	-0.152188	0.588191
CSS0001395.1	CSS0001395	black	-0.151359	0.590251
CSS0035699.1	CSS0035699	black	0.151025	0.591079
CSS0045644.1	CSS0045644	black	0.150609	0.592115
CSS0032555.1	CSS0032555	black	0.150597	0.592144
CSS0038847.1	CSS0038847	black	0.15031	0.592859
CSS0045852.1	CSS0045852	black	0.1501	0.593382
CSS0038103.1	CSS0038103	black	-0.14937	0.5952
CSS0027127.1	CSS0027127	black	0.149339	0.595277
CSS0010357.1	CSS0010357	black	0.149321	0.595321
CSS0014206.1	CSS0014206	black	-0.14899	0.596148
CSS0012121.1	CSS0012121	black	-0.14885	0.596497
CSS0045328.1	CSS0045328	black	-0.148493	0.597386
CSS0045458.1	CSS0045458	black	-0.148125	0.598306
CSS0005140.1	CSS0005140	black	0.147943	0.598762
CSS0032667.1	CSS0032667	black	0.147247	0.600502
CSS0026991.1	CSS0026991	black	-0.146849	0.601497
CSS0031345.1	CSS0031345	black	0.14639	0.602645
CSS0011293.1	CSS0011293	black	0.146289	0.602901
CSS0005994.1	CSS0005994	black	0.146248	0.603002
CSS0000047.1	CSS0000047	black	0.14579	0.604151
CSS0026054.1	CSS0026054	black	0.145614	0.604592
CSS0022050.1	CSS0022050	black	-0.145533	0.604796
CSS0001351.1	CSS0001351	black	0.144325	0.607829
CSS0013311.1	CSS0013311	black	0.144307	0.607872
CSS0034993.1	CSS0034993	black	0.144286	0.607926
CSS0004203.1	CSS0004203	black	-0.144209	0.60812
CSS0012179.1	CSS0012179	black	0.143929	0.608825
CSS0022166.1	CSS0022166	black	-0.143239	0.610562
CSS0047236.1	CSS0047236	black	-0.143145	0.610798
CSS0039902.1	CSS0039902	black	-0.142979	0.611215
CSS0050243.1	CSS0050243	black	0.142849	0.611544
CSS0037013.1	CSS0037013	black	0.142752	0.611786
CSS0018314.1	CSS0018314	black	0.142356	0.612785
CSS0003494.1	CSS0003494	black	-0.142106	0.613417
CSS0047103.1	CSS0047103	black	-0.142106	0.613417
CSS0044163.1	CSS0044163	black	0.141167	0.615787
CSS0028665.1	CSS0028665	black	0.139825	0.619181
CSS0012951.2	CSS0012951	black	-0.139703	0.619489
CSS0016943.1	CSS0016943	black	0.139622	0.619695
CSS0007178.1	CSS0007178	black	-0.139198	0.620769
CSS0031346.1	CSS0031346	black	0.138779	0.621832
CSS0015750.1	CSS0015750	black	0.137779	0.624367
CSS0021494.1	CSS0021494	black	-0.137774	0.624381
CSS0045483.1	CSS0045483	black	-0.137203	0.625833
CSS0048387.1	CSS0048387	black	0.137	0.626348
CSS0023433.1	CSS0023433	black	-0.137	0.626348
CSS0033035.1	CSS0033035	black	-0.137	0.626348
CSS0009082.1	CSS0009082	black	0.136389	0.627903
CSS0035204.1	CSS0035204	black	0.136346	0.628011
CSS0033218.1	CSS0033218	black	0.136325	0.628065
CSS0005480.1	CSS0005480	black	0.136127	0.628569
CSS0047753.1	CSS0047753	black	0.13548	0.630217
CSS0031942.1	CSS0031942	black	-0.135392	0.630441
CSS0042807.1	CSS0042807	black	-0.135392	0.630441
CSS0018762.1	CSS0018762	black	0.135367	0.630505
CSS0005183.1	CSS0005183	black	-0.135037	0.631347
CSS0023293.1	CSS0023293	black	-0.13364	0.634914
CSS0016416.1	CSS0016416	black	-0.133521	0.635218
CSS0008111.1	CSS0008111	black	-0.133511	0.635243
CSS0036271.1	CSS0036271	black	-0.133453	0.635391
CSS0015789.1	CSS0015789	black	0.133229	0.635964
CSS0033403.1	CSS0033403	black	-0.133193	0.636057
CSS0023529.1	CSS0023529	black	-0.132508	0.63781
CSS0005788.1	CSS0005788	black	0.132416	0.638044
CSS0000093.1	CSS0000093	black	0.1324	0.638085
CSS0045630.1	CSS0045630	black	0.132299	0.638344
CSS0009562.1	CSS0009562	black	-0.131999	0.639112
CSS0002206.1	CSS0002206	black	0.131434	0.64056
CSS0047337.1	CSS0047337	black	0.130915	0.641893
CSS0029270.1	CSS0029270	black	-0.13072	0.642392
CSS0025441.1	CSS0025441	black	-0.130694	0.642459
CSS0013604.1	CSS0013604	black	0.129826	0.64469
CSS0040036.1	CSS0040036	black	0.129512	0.645497
CSS0032024.1	CSS0032024	black	0.128758	0.647437
CSS0005345.1	CSS0005345	black	-0.128701	0.647582
CSS0001241.1	CSS0001241	black	0.128574	0.647911
CSS0044892.1	CSS0044892	black	0.127965	0.64948
CSS0017184.1	CSS0017184	black	-0.12795	0.649517
CSS0035954.1	CSS0035954	black	0.127599	0.650423
CSS0032401.1	CSS0032401	black	0.127337	0.651098
CSS0022689.1	CSS0022689	black	0.127255	0.651308
CSS0041692.1	CSS0041692	black	-0.127251	0.651321
CSS0044196.1	CSS0044196	black	-0.127251	0.651321
CSS0050012.1	CSS0050012	black	0.127219	0.651403
CSS0030159.1	CSS0030159	black	-0.12706	0.651813
CSS0015366.1	CSS0015366	black	-0.126711	0.652713
CSS0007185.1	CSS0007185	black	-0.126663	0.652838
CSS0019543.1	CSS0019543	black	0.126008	0.654529
CSS0032944.1	CSS0032944	black	0.125342	0.65625
CSS0027129.1	CSS0027129	black	0.125114	0.656841
CSS0007937.1	CSS0007937	black	0.12502	0.657083
CSS0046943.1	CSS0046943	black	-0.124217	0.659162
CSS0030795.1	CSS0030795	black	-0.123847	0.660122
CSS0010896.1	CSS0010896	black	-0.123782	0.660289
CSS0049282.1	CSS0049282	black	-0.123352	0.661404
CSS0001236.1	CSS0001236	black	-0.122819	0.662788
CSS0007534.1	CSS0007534	black	0.121765	0.665527
CSS0011791.1	CSS0011791	black	0.121756	0.66555
CSS0013696.1	CSS0013696	black	0.121756	0.66555
CSS0043603.1	CSS0043603	black	-0.121704	0.665685
CSS0023732.1	CSS0023732	black	-0.121605	0.665943
CSS0026645.1	CSS0026645	black	0.12158	0.666008
CSS0006732.1	CSS0006732	black	0.121258	0.666844
CSS0046040.1	CSS0046040	black	0.120797	0.668043
CSS0037071.1	CSS0037071	black	0.120341	0.669232
CSS0044207.1	CSS0044207	black	-0.119849	0.670514
CSS0026711.1	CSS0026711	black	-0.119762	0.670741
CSS0022126.1	CSS0022126	black	-0.119244	0.672092
CSS0018850.1	CSS0018850	black	0.118932	0.672906
CSS0025968.1	CSS0025968	black	-0.118515	0.673993
CSS0001472.1	CSS0001472	black	0.118455	0.674149
CSS0018471.1	CSS0018471	black	-0.118387	0.674328
CSS0001772.1	CSS0001772	black	0.11811	0.67505
CSS0004723.1	CSS0004723	black	0.117904	0.675588
CSS0040203.1	CSS0040203	black	0.117784	0.675903
CSS0030109.1	CSS0030109	black	0.11763	0.676306
CSS0048930.1	CSS0048930	black	0.11763	0.676306
CSS0041321.1	CSS0041321	black	-0.117563	0.67648
CSS0010862.1	CSS0010862	black	0.117244	0.677315
CSS0022124.1	CSS0022124	black	0.11715	0.677559
CSS0000615.1	CSS0000615	black	0.116898	0.67822
CSS0041214.1	CSS0041214	black	0.116828	0.678403
CSS0031652.1	CSS0031652	black	-0.116371	0.679599
CSS0021903.1	CSS0021903	black	0.116333	0.679698
CSS0012260.1	CSS0012260	black	-0.115474	0.681948
CSS0042951.1	CSS0042951	black	-0.115399	0.682146
CSS0037700.1	CSS0037700	black	0.115378	0.682199
CSS0012474.1	CSS0012474	black	-0.115252	0.682532
CSS0034834.1	CSS0034834	black	-0.115122	0.68287
CSS0017981.1	CSS0017981	black	-0.114942	0.683344
CSS0025170.1	CSS0025170	black	-0.114533	0.684417
CSS0016020.1	CSS0016020	black	0.114398	0.684772
CSS0034548.1	CSS0034548	black	0.11427	0.685106
CSS0019607.1	CSS0019607	black	0.113832	0.686258
CSS0023769.1	CSS0023769	black	-0.113577	0.686928
CSS0033798.1	CSS0033798	black	-0.113529	0.687053
CSS0025062.1	CSS0025062	black	0.113511	0.6871
CSS0034787.1	CSS0034787	black	0.113242	0.687809
CSS0018529.1	CSS0018529	black	-0.113085	0.688219
CSS0027360.1	CSS0027360	black	0.112613	0.689461
CSS0043792.1	CSS0043792	black	0.112613	0.689461
CSS0013992.1	CSS0013992	black	-0.112359	0.690129
CSS0013791.1	CSS0013791	black	-0.112313	0.690251
CSS0006831.1	CSS0006831	black	0.112109	0.690788
CSS0015004.1	CSS0015004	black	0.112109	0.690788
CSS0049315.1	CSS0049315	black	0.11207	0.690892
CSS0045988.1	CSS0045988	black	-0.112021	0.691021
CSS0019211.1	CSS0019211	black	0.111957	0.691187
CSS0032478.1	CSS0032478	black	0.111778	0.691661
CSS0015229.1	CSS0015229	black	0.11172	0.691811
CSS0046199.1	CSS0046199	black	-0.111403	0.692647
CSS0035966.1	CSS0035966	black	0.111356	0.69277
CSS0050327.1	CSS0050327	black	0.111331	0.692838
CSS0005509.1	CSS0005509	black	-0.110548	0.694901
CSS0013129.1	CSS0013129	black	0.110414	0.695254
CSS0015119.1	CSS0015119	black	0.110277	0.695616
CSS0005020.1	CSS0005020	black	0.10959	0.69743
CSS0012519.1	CSS0012519	black	0.109541	0.69756
CSS0038105.1	CSS0038105	black	-0.109401	0.697927
CSS0033659.1	CSS0033659	black	-0.109067	0.698811
CSS0012896.1	CSS0012896	black	-0.109053	0.698848
CSS0013668.1	CSS0013668	black	0.109007	0.698969
CSS0021911.1	CSS0021911	black	-0.108809	0.699492
CSS0037904.1	CSS0037904	black	-0.108758	0.699627
CSS0035508.1	CSS0035508	black	0.108249	0.700973
CSS0005226.1	CSS0005226	black	-0.108175	0.701168
CSS0035281.1	CSS0035281	black	-0.107337	0.703386
CSS0042742.1	CSS0042742	black	0.107265	0.703577
CSS0031896.1	CSS0031896	black	0.107187	0.703784
CSS0046409.1	CSS0046409	black	0.107187	0.703784
CSS0045511.1	CSS0045511	black	0.106937	0.704446
CSS0008323.1	CSS0008323	black	-0.106728	0.705
CSS0029434.1	CSS0029434	black	0.106656	0.705192
CSS0003477.1	CSS0003477	black	-0.106277	0.706195
CSS0006608.1	CSS0006608	black	-0.106094	0.70668
CSS0027697.1	CSS0027697	black	-0.10574	0.707619
CSS0003930.1	CSS0003930	black	0.105519	0.708205
CSS0036040.1	CSS0036040	black	-0.105364	0.708618
CSS0026354.1	CSS0026354	black	0.104915	0.709808
CSS0026346.1	CSS0026346	black	-0.104466	0.711001
CSS0017361.1	CSS0017361	black	0.104112	0.711941
CSS0020652.1	CSS0020652	black	0.104002	0.712235
CSS0007148.1	CSS0007148	black	-0.103292	0.714124
CSS0043159.1	CSS0043159	black	0.102205	0.717016
CSS0020681.1	CSS0020681	black	0.101856	0.717946
CSS0009152.1	CSS0009152	black	0.101771	0.718172
CSS0000547.1	CSS0000547	black	0.101253	0.719555
CSS0026856.1	CSS0026856	black	-0.100923	0.720434
CSS0050370.1	CSS0050370	black	-0.100892	0.720517
CSS0024347.1	CSS0024347	black	-0.100537	0.721464
CSS0019703.1	CSS0019703	black	0.100389	0.721859
CSS0034148.1	CSS0034148	black	-0.0997805	0.723484
CSS0025254.1	CSS0025254	black	0.0992484	0.724905
CSS0029576.1	CSS0029576	black	-0.0986584	0.726483
CSS0013162.1	CSS0013162	black	0.0985508	0.72677
CSS0042978.2	CSS0042978	black	-0.0982349	0.727615
CSS0032741.1	CSS0032741	black	-0.0974829	0.729628
CSS0003781.1	CSS0003781	black	0.0966906	0.731751
CSS0004881.1	CSS0004881	black	0.0966872	0.73176
CSS0041556.1	CSS0041556	black	0.096082	0.733382
CSS0038516.1	CSS0038516	black	-0.0953249	0.735413
CSS0041965.1	CSS0041965	black	0.0953071	0.735461
CSS0037426.1	CSS0037426	black	-0.0947806	0.736875
CSS0026735.1	CSS0026735	black	-0.0947196	0.737038
CSS0015704.1	CSS0015704	black	-0.0944934	0.737646
CSS0045629.1	CSS0045629	black	0.0934925	0.740336
CSS0035683.1	CSS0035683	black	0.0933309	0.74077
CSS0006289.1	CSS0006289	black	0.0929213	0.741873
CSS0015001.1	CSS0015001	black	-0.0925908	0.742762
CSS0034181.2	CSS0034181	black	0.0910111	0.747017
CSS0016043.1	CSS0016043	black	-0.0908831	0.747362
CSS0004584.1	CSS0004584	black	-0.0906066	0.748108
CSS0044871.1	CSS0044871	black	0.090434	0.748573
CSS0014992.1	CSS0014992	black	0.0904328	0.748577
CSS0043540.1	CSS0043540	black	0.0903731	0.748738
CSS0013329.1	CSS0013329	black	-0.0891266	0.752102
CSS0021599.1	CSS0021599	black	-0.0881555	0.754726
CSS0010176.1	CSS0010176	black	0.0878197	0.755634
CSS0050022.2	CSS0050022	black	0.0864544	0.759329
CSS0000337.1	CSS0000337	black	0.0863648	0.759572
CSS0030959.1	CSS0030959	black	0.0855461	0.76179
CSS0049994.2	CSS0049994	black	0.0855249	0.761847
CSS0020323.1	CSS0020323	black	0.0855041	0.761904
CSS0009735.1	CSS0009735	black	-0.0853414	0.762345
CSS0011338.1	CSS0011338	black	-0.0850621	0.763102
CSS0038286.1	CSS0038286	black	-0.0850621	0.763102
CSS0008369.1	CSS0008369	black	0.0849522	0.7634
CSS0000130.1	CSS0000130	black	0.0849055	0.763527
CSS0039458.1	CSS0039458	black	0.0849055	0.763527
CSS0015705.1	CSS0015705	black	0.0848945	0.763557
CSS0026152.1	CSS0026152	black	0.0846977	0.76409
CSS0005269.1	CSS0005269	black	-0.0836915	0.766821
CSS0021437.1	CSS0021437	black	0.0836337	0.766978
CSS0002146.1	CSS0002146	black	-0.083418	0.767564
CSS0049592.1	CSS0049592	black	-0.0833972	0.76762
CSS0002405.1	CSS0002405	black	-0.0833276	0.767809
CSS0018650.1	CSS0018650	black	-0.083154	0.768281
CSS0005403.1	CSS0005403	black	-0.0802395	0.776208
CSS0017790.1	CSS0017790	black	0.0801523	0.776446
CSS0038060.1	CSS0038060	black	-0.0797151	0.777637
CSS0028322.1	CSS0028322	black	-0.0793246	0.778701
CSS0016565.1	CSS0016565	black	0.079259	0.77888
CSS0013870.1	CSS0013870	black	-0.0791192	0.779261
CSS0025376.1	CSS0025376	black	0.07877	0.780213
CSS0007923.1	CSS0007923	black	0.0786659	0.780497
CSS0041954.1	CSS0041954	black	-0.0779005	0.782585
CSS0036057.1	CSS0036057	black	0.0776873	0.783167
CSS0040390.1	CSS0040390	black	-0.0772788	0.784282
CSS0020129.1	CSS0020129	black	0.0768032	0.785581
CSS0024747.1	CSS0024747	black	0.0763206	0.7869
CSS0005989.1	CSS0005989	black	0.0760389	0.78767
CSS0030165.1	CSS0030165	black	0.0755127	0.789108
CSS0032516.1	CSS0032516	black	0.0752911	0.789715
CSS0036204.1	CSS0036204	black	-0.0752181	0.789914
CSS0005062.1	CSS0005062	black	-0.0751323	0.790149
CSS0016561.1	CSS0016561	black	0.0747678	0.791146
CSS0000682.1	CSS0000682	black	0.0744157	0.79211
CSS0021865.2	CSS0021865	black	-0.0740194	0.793195
CSS0001294.1	CSS0001294	black	-0.0739706	0.793328
CSS0047432.1	CSS0047432	black	0.0737848	0.793837
CSS0045252.1	CSS0045252	black	0.0727933	0.796554
CSS0050470.1	CSS0050470	black	-0.0726645	0.796906
CSS0037574.1	CSS0037574	black	-0.0725126	0.797323
CSS0001256.1	CSS0001256	black	0.0722004	0.798179
CSS0047877.1	CSS0047877	black	0.0718056	0.799262
CSS0033564.1	CSS0033564	black	0.0715491	0.799965
CSS0029199.1	CSS0029199	black	0.0710677	0.801286
CSS0020875.1	CSS0020875	black	-0.0710091	0.801447
CSS0021821.1	CSS0021821	black	-0.0700704	0.804025
CSS0026756.2	CSS0026756	black	0.0695978	0.805323
CSS0028493.1	CSS0028493	black	-0.0694217	0.805807
CSS0043048.1	CSS0043048	black	-0.0691788	0.806474
CSS0022756.1	CSS0022756	black	-0.0688169	0.807469
CSS0030683.1	CSS0030683	black	-0.068408	0.808594
CSS0000813.1	CSS0000813	black	0.0679164	0.809946
CSS0046173.1	CSS0046173	black	0.0678826	0.810039
CSS0027957.1	CSS0027957	black	0.067708	0.810519
CSS0034811.1	CSS0034811	black	0.0668986	0.812747
CSS0035484.1	CSS0035484	black	0.0667047	0.813281
CSS0030568.1	CSS0030568	black	0.0664539	0.813972
CSS0016548.1	CSS0016548	black	-0.066411	0.81409
CSS0029971.1	CSS0029971	black	-0.0662692	0.81448
CSS0006165.1	CSS0006165	black	0.0662097	0.814644
CSS0013451.1	CSS0013451	black	0.0659294	0.815417
CSS0014226.1	CSS0014226	black	0.0655532	0.816453
CSS0034855.1	CSS0034855	black	0.0653634	0.816976
CSS0004855.1	CSS0004855	black	0.0652025	0.81742
CSS0050466.1	CSS0050466	black	0.0643617	0.819738
CSS0024629.1	CSS0024629	black	0.0642681	0.819997
CSS0007229.1	CSS0007229	black	-0.0637015	0.82156
CSS0003552.1	CSS0003552	black	-0.0633973	0.822399
CSS0032407.1	CSS0032407	black	-0.0633468	0.822539
CSS0006953.1	CSS0006953	black	-0.0626734	0.824398
CSS0012826.1	CSS0012826	black	0.0625949	0.824615
CSS0011813.1	CSS0011813	black	0.062394	0.82517
CSS0027471.1	CSS0027471	black	-0.0623574	0.825271
CSS0017476.1	CSS0017476	black	-0.0618581	0.82665
CSS0041528.2	CSS0041528	black	-0.0615911	0.827388
CSS0002349.1	CSS0002349	black	0.061517	0.827593
CSS0047705.1	CSS0047705	black	0.0609885	0.829054
CSS0037003.1	CSS0037003	black	0.0609057	0.829283
CSS0023135.1	CSS0023135	black	-0.0607987	0.829579
CSS0038117.1	CSS0038117	black	-0.0603113	0.830927
CSS0016190.1	CSS0016190	black	0.0602582	0.831073
CSS0023525.1	CSS0023525	black	-0.0597802	0.832396
CSS0019520.1	CSS0019520	black	-0.0595392	0.833063
CSS0004045.1	CSS0004045	black	-0.059103	0.83427
CSS0015490.1	CSS0015490	black	0.0585957	0.835675
CSS0016108.1	CSS0016108	black	-0.058588	0.835696
CSS0027393.1	CSS0027393	black	0.0580604	0.837157
CSS0038165.1	CSS0038165	black	0.0580604	0.837157
CSS0013691.1	CSS0013691	black	-0.0578055	0.837864
CSS0003608.1	CSS0003608	black	-0.0576651	0.838253
CSS0037261.2	CSS0037261	black	0.0571804	0.839596
CSS0028927.1	CSS0028927	black	0.0567288	0.840848
CSS0008835.1	CSS0008835	black	-0.0564499	0.841621
CSS0014106.1	CSS0014106	black	0.056314	0.841998
CSS0045621.1	CSS0045621	black	-0.0562218	0.842254
CSS0003625.1	CSS0003625	black	0.0561559	0.842436
CSS0007882.1	CSS0007882	black	-0.0559916	0.842892
CSS0019557.1	CSS0019557	black	0.0554824	0.844305
CSS0017632.1	CSS0017632	black	0.0553684	0.844621
CSS0045874.1	CSS0045874	black	0.0549455	0.845795
CSS0028449.1	CSS0028449	black	-0.054778	0.84626
CSS0040783.1	CSS0040783	black	-0.0547291	0.846395
CSS0027433.2	CSS0027433	black	0.0542301	0.847781
CSS0022965.1	CSS0022965	black	0.0538188	0.848923
CSS0036241.1	CSS0036241	black	0.0532934	0.850382
CSS0030170.1	CSS0030170	black	-0.0529023	0.851469
CSS0047623.1	CSS0047623	black	-0.0528605	0.851585
CSS0040504.1	CSS0040504	black	0.0526838	0.852076
CSS0043064.1	CSS0043064	black	-0.0526315	0.852222
CSS0007031.1	CSS0007031	black	-0.0521618	0.853527
CSS0048083.1	CSS0048083	black	-0.0521618	0.853527
CSS0007745.1	CSS0007745	black	-0.051516	0.855323
CSS0030294.1	CSS0030294	black	0.0512044	0.85619
CSS0041526.1	CSS0041526	black	0.0511862	0.85624
CSS0045519.1	CSS0045519	black	-0.050374	0.8585
CSS0023041.1	CSS0023041	black	-0.0501917	0.859007
CSS0005167.1	CSS0005167	black	-0.05015	0.859123
CSS0006164.1	CSS0006164	black	0.0501332	0.85917
CSS0025554.1	CSS0025554	black	-0.0498583	0.859935
CSS0039105.1	CSS0039105	black	0.0493174	0.861441
CSS0034529.1	CSS0034529	black	0.0492457	0.861641
CSS0043113.1	CSS0043113	black	-0.049214	0.861729
CSS0001372.1	CSS0001372	black	0.0486472	0.863308
CSS0043610.1	CSS0043610	black	0.0486415	0.863324
CSS0026723.1	CSS0026723	black	0.0482953	0.864288
CSS0042440.1	CSS0042440	black	0.0482953	0.864288
CSS0021183.1	CSS0021183	black	0.0479757	0.865179
CSS0044467.1	CSS0044467	black	0.0478745	0.865461
CSS0025567.1	CSS0025567	black	-0.0469622	0.868004
CSS0008243.1	CSS0008243	black	-0.0468599	0.868289
CSS0016460.1	CSS0016460	black	-0.0462832	0.869897
CSS0046402.1	CSS0046402	black	-0.0455978	0.871809
CSS0017930.1	CSS0017930	black	0.0452198	0.872864
CSS0037313.1	CSS0037313	black	-0.0450915	0.873222
CSS0010613.1	CSS0010613	black	0.0447702	0.874118
CSS0029868.1	CSS0029868	black	0.0447368	0.874212
CSS0047648.1	CSS0047648	black	-0.04422	0.875654
CSS0012328.1	CSS0012328	black	-0.0436001	0.877385
CSS0050124.1	CSS0050124	black	-0.0432447	0.878378
CSS0015585.1	CSS0015585	black	-0.0429462	0.879212
CSS0025066.1	CSS0025066	black	-0.0427874	0.879655
CSS0032369.1	CSS0032369	black	-0.0427116	0.879867
CSS0049537.1	CSS0049537	black	0.042276	0.881084
CSS0002763.1	CSS0002763	black	-0.0415318	0.883164
CSS0009734.1	CSS0009734	black	-0.0413644	0.883632
CSS0006828.1	CSS0006828	black	0.0413644	0.883632
CSS0029259.1	CSS0029259	black	-0.0402848	0.886651
CSS0032830.1	CSS0032830	black	-0.039626	0.888494
CSS0047974.1	CSS0047974	black	-0.0394629	0.88895
CSS0045523.1	CSS0045523	black	0.0391404	0.889853
CSS0000706.1	CSS0000706	black	0.0389861	0.890284
CSS0009729.1	CSS0009729	black	0.0386306	0.891279
CSS0030659.1	CSS0030659	black	0.0386043	0.891353
CSS0009375.1	CSS0009375	black	0.0384113	0.891893
CSS0045245.1	CSS0045245	black	-0.0381451	0.892638
CSS0025886.1	CSS0025886	black	0.0376476	0.894031
CSS0008669.1	CSS0008669	black	0.037485	0.894487
CSS0037054.1	CSS0037054	black	0.0374149	0.894683
CSS0029923.1	CSS0029923	black	-0.0374014	0.894721
CSS0049177.1	CSS0049177	black	0.0370955	0.895577
CSS0043550.1	CSS0043550	black	-0.0368373	0.896301
CSS0015877.1	CSS0015877	black	-0.0367991	0.896408
CSS0010340.1	CSS0010340	black	0.0367564	0.896527
CSS0015183.1	CSS0015183	black	-0.0360333	0.898553
CSS0040896.1	CSS0040896	black	-0.0359326	0.898835
CSS0039888.1	CSS0039888	black	-0.0358902	0.898954
CSS0025826.1	CSS0025826	black	-0.0357914	0.899231
CSS0004195.1	CSS0004195	black	0.0357512	0.899344
CSS0026070.1	CSS0026070	black	-0.0355053	0.900033
CSS0021110.1	CSS0021110	black	-0.0353109	0.900578
CSS0012012.1	CSS0012012	black	0.035087	0.901205
CSS0015320.1	CSS0015320	black	0.0347241	0.902222
CSS0037583.1	CSS0037583	black	0.0347083	0.902267
CSS0009926.1	CSS0009926	black	0.0345842	0.902615
CSS0035370.1	CSS0035370	black	0.0345842	0.902615
CSS0017294.1	CSS0017294	black	0.034456	0.902974
CSS0024612.1	CSS0024612	black	0.0343904	0.903158
CSS0004823.1	CSS0004823	black	0.0339836	0.904299
CSS0043969.1	CSS0043969	black	0.0336521	0.905228
CSS0013277.1	CSS0013277	black	-0.0335844	0.905418
CSS0011036.1	CSS0011036	black	-0.0335276	0.905577
CSS0011746.1	CSS0011746	black	-0.0334095	0.905909
CSS0013875.1	CSS0013875	black	0.0332926	0.906236
CSS0019871.1	CSS0019871	black	0.032419	0.908687
CSS0002815.1	CSS0002815	black	-0.0322761	0.909088
CSS0042338.1	CSS0042338	black	-0.0318411	0.910309
CSS0032524.1	CSS0032524	black	-0.0318085	0.9104
CSS0016354.1	CSS0016354	black	-0.0316567	0.910826
CSS0002503.1	CSS0002503	black	-0.0312194	0.912054
CSS0014498.1	CSS0014498	black	0.030598	0.913798
CSS0001122.1	CSS0001122	black	-0.0303307	0.914549
CSS0023470.1	CSS0023470	black	-0.0303307	0.914549
CSS0021157.1	CSS0021157	black	0.0299096	0.915731
CSS0020281.1	CSS0020281	black	0.0297918	0.916062
CSS0018611.1	CSS0018611	black	-0.0297726	0.916116
CSS0029642.1	CSS0029642	black	-0.0297389	0.916211
CSS0031202.1	CSS0031202	black	-0.0296299	0.916517
CSS0047185.1	CSS0047185	black	-0.0293669	0.917255
CSS0018477.1	CSS0018477	black	0.028245	0.920407
CSS0025060.1	CSS0025060	black	0.0280576	0.920934
CSS0032966.2	CSS0032966	black	0.02701	0.923878
CSS0031590.1	CSS0031590	black	-0.0269612	0.924015
CSS0031006.1	CSS0031006	black	-0.0258719	0.927077
CSS0013957.1	CSS0013957	black	0.0255664	0.927936
CSS0007422.1	CSS0007422	black	-0.0254149	0.928362
CSS0009148.1	CSS0009148	black	0.0252021	0.928961
CSS0001219.1	CSS0001219	black	-0.0251667	0.92906
CSS0036065.1	CSS0036065	black	0.025032	0.929439
CSS0007565.1	CSS0007565	black	-0.0246258	0.930581
CSS0035269.1	CSS0035269	black	-0.024625	0.930584
CSS0015117.1	CSS0015117	black	-0.0245495	0.930796
CSS0024308.2	CSS0024308	black	0.0244823	0.930985
CSS0004312.1	CSS0004312	black	0.0240306	0.932256
CSS0017762.1	CSS0017762	black	-0.0238318	0.932815
CSS0026989.1	CSS0026989	black	0.0233554	0.934155
CSS0020238.1	CSS0020238	black	0.0232108	0.934562
CSS0034094.1	CSS0034094	black	0.0230916	0.934898
CSS0025301.1	CSS0025301	black	-0.0229925	0.935176
CSS0011263.1	CSS0011263	black	-0.0227741	0.935791
CSS0048687.1	CSS0048687	black	-0.0227392	0.935889
CSS0019704.1	CSS0019704	black	-0.0219104	0.938222
CSS0004636.1	CSS0004636	black	0.0219088	0.938226
CSS0039389.1	CSS0039389	black	-0.0218517	0.938387
CSS0045468.1	CSS0045468	black	-0.0214615	0.939485
CSS0000705.1	CSS0000705	black	-0.0210345	0.940687
CSS0045889.1	CSS0045889	black	-0.0209262	0.940992
CSS0035118.1	CSS0035118	black	-0.0207184	0.941577
CSS0036538.1	CSS0036538	black	0.0206386	0.941802
CSS0000879.1	CSS0000879	black	0.0205719	0.94199
CSS0001435.1	CSS0001435	black	-0.0204663	0.942287
CSS0041737.1	CSS0041737	black	-0.0200684	0.943407
CSS0005312.1	CSS0005312	black	-0.019862	0.943989
CSS0020152.1	CSS0020152	black	-0.0188754	0.946767
CSS0012458.1	CSS0012458	black	-0.0181915	0.948693
CSS0036110.1	CSS0036110	black	-0.017624	0.950292
CSS0035159.1	CSS0035159	black	-0.0175593	0.950474
CSS0043545.1	CSS0043545	black	0.0174041	0.950912
CSS0038412.1	CSS0038412	black	0.016869	0.952419
CSS0035705.1	CSS0035705	black	0.0158332	0.955338
CSS0019772.2	CSS0019772	black	-0.0157595	0.955546
CSS0014804.1	CSS0014804	black	0.0157422	0.955595
CSS0043999.1	CSS0043999	black	-0.0154728	0.956354
CSS0015756.1	CSS0015756	black	0.0144571	0.959217
CSS0041037.1	CSS0041037	black	0.0140881	0.960257
CSS0028612.1	CSS0028612	black	-0.0137565	0.961192
CSS0031708.1	CSS0031708	black	0.0137069	0.961331
CSS0030716.1	CSS0030716	black	0.0130868	0.96308
CSS0032508.1	CSS0032508	black	0.0130485	0.963188
CSS0046583.1	CSS0046583	black	0.0130403	0.963211
CSS0047550.1	CSS0047550	black	-0.0130133	0.963287
CSS0019394.1	CSS0019394	black	-0.0128626	0.963712
CSS0041226.1	CSS0041226	black	-0.0126664	0.964265
CSS0007447.1	CSS0007447	black	0.0126272	0.964376
CSS0017928.1	CSS0017928	black	0.0125586	0.964569
CSS0026743.1	CSS0026743	black	0.0125586	0.964569
CSS0033988.1	CSS0033988	black	-0.0123946	0.965031
CSS0023661.1	CSS0023661	black	0.0123678	0.965107
CSS0025320.1	CSS0025320	black	-0.0119148	0.966384
CSS0009916.1	CSS0009916	black	-0.010559	0.970208
CSS0046415.1	CSS0046415	black	-0.0104765	0.97044
CSS0027900.1	CSS0027900	black	0.0103752	0.970726
CSS0014578.1	CSS0014578	black	0.0102992	0.970941
CSS0001740.1	CSS0001740	black	0.00999899	0.971787
CSS0002997.1	CSS0002997	black	-0.00958631	0.972951
CSS0037046.1	CSS0037046	black	0.00937879	0.973537
CSS0046300.1	CSS0046300	black	0.0093598	0.97359
CSS0019815.1	CSS0019815	black	-0.00908714	0.974359
CSS0002342.1	CSS0002342	black	0.00894209	0.974768
CSS0029266.1	CSS0029266	black	-0.00863233	0.975642
CSS0005925.1	CSS0005925	black	0.0084401	0.976185
CSS0034582.1	CSS0034582	black	0.0083271	0.976503
CSS0001386.1	CSS0001386	black	-0.00821482	0.97682
CSS0001521.1	CSS0001521	black	0.0075895	0.978584
CSS0045682.1	CSS0045682	black	0.00733318	0.979307
CSS0023787.1	CSS0023787	black	0.00707176	0.980045
CSS0034058.1	CSS0034058	black	0.00704745	0.980113
CSS0003611.1	CSS0003611	black	-0.00637365	0.982014
CSS0002809.1	CSS0002809	black	0.00614295	0.982665
CSS0010821.1	CSS0010821	black	0.00536031	0.984874
CSS0008036.1	CSS0008036	black	0.00510256	0.985601
CSS0042130.1	CSS0042130	black	0.00473475	0.986639
CSS0034320.1	CSS0034320	black	-0.00469878	0.98674
CSS0033256.1	CSS0033256	black	0.00462861	0.986938
CSS0013248.1	CSS0013248	black	0.00443217	0.987493
CSS0026506.1	CSS0026506	black	-0.00379256	0.989297
CSS0005997.1	CSS0005997	black	0.0037512	0.989414
CSS0049484.1	CSS0049484	black	0.00357762	0.989904
CSS0035432.1	CSS0035432	black	0.00334973	0.990547
CSS0022384.1	CSS0022384	black	-0.00322743	0.990892
CSS0020481.1	CSS0020481	black	0.00316476	0.991069
CSS0006954.1	CSS0006954	black	-0.00262689	0.992587
CSS0003551.1	CSS0003551	black	-0.00251806	0.992894
CSS0006698.1	CSS0006698	black	0.00166596	0.995299
CSS0018714.1	CSS0018714	black	-0.0010339	0.997082
CSS0036135.1	CSS0036135	black	-0.000515845	0.998544
CSS0045331.1	CSS0045331	black	0.000390104	0.998899
CSS0033658.1	CSS0033658	black	0.00024649	0.999304
CSS0008144.1	CSS0008144	black	-0.000237543	0.99933
CSS0048600.1	CSS0048600	black	-2.32454e-05	0.999934
CSS0011997.1	CSS0011997	black	1.79737e-05	0.999949
CSS0012100.1	CSS0012100	blue	0.873313	2.12096e-05
CSS0032838.1	CSS0032838	blue	-0.846554	6.88946e-05
CSS0035730.1	CSS0035730	blue	-0.846554	6.88946e-05
CSS0040974.1	CSS0040974	blue	-0.829515	0.000130794
CSS0015427.1	CSS0015427	blue	0.825074	0.000152843
CSS0040193.1	CSS0040193	blue	-0.809033	0.000259437
CSS0030800.1	CSS0030800	blue	-0.798875	0.000353952
CSS0019230.1	CSS0019230	blue	-0.780593	0.000594177
CSS0008511.1	CSS0008511	blue	0.774231	0.000703692
CSS0016214.1	CSS0016214	blue	-0.765663	0.000876571
CSS0048008.1	CSS0048008	blue	-0.765663	0.000876571
CSS0014265.1	CSS0014265	blue	-0.763704	0.000920552
CSS0042069.2	CSS0042069	blue	-0.761844	0.000963961
CSS0013717.1	CSS0013717	blue	-0.760718	0.000991034
CSS0043562.1	CSS0043562	blue	-0.759	0.00103352
CSS0034279.1	CSS0034279	blue	-0.758493	0.00104634
CSS0002157.1	CSS0002157	blue	-0.750754	0.00125851
CSS0036821.1	CSS0036821	blue	-0.744474	0.00145507
CSS0039707.1	CSS0039707	blue	-0.743352	0.00149265
CSS0039718.1	CSS0039718	blue	-0.742423	0.00152438
CSS0050501.1	CSS0050501	blue	-0.74189	0.00154281
CSS0037946.1	CSS0037946	blue	-0.738596	0.0016608
CSS0037320.1	CSS0037320	blue	-0.737534	0.00170034
CSS0031315.1	CSS0031315	blue	0.731055	0.00195837
CSS0031454.1	CSS0031454	blue	-0.728118	0.00208522
CSS0036348.1	CSS0036348	blue	-0.722485	0.00234698
CSS0026481.1	CSS0026481	blue	-0.719183	0.00251223
CSS0000636.1	CSS0000636	blue	-0.717124	0.00261994
CSS0047763.1	CSS0047763	blue	-0.715911	0.00268507
CSS0034815.1	CSS0034815	blue	-0.711026	0.00296066
CSS0032155.1	CSS0032155	blue	-0.709759	0.00303574
CSS0050052.1	CSS0050052	blue	0.708836	0.00309134
CSS0027758.1	CSS0027758	blue	0.706871	0.00321246
CSS0007791.1	CSS0007791	blue	0.703589	0.00342315
CSS0011111.1	CSS0011111	blue	-0.700968	0.00359926
CSS0019687.1	CSS0019687	blue	-0.699296	0.00371525
CSS0020807.1	CSS0020807	blue	0.698363	0.00378133
CSS0009221.1	CSS0009221	blue	0.69638	0.00392478
CSS0045894.1	CSS0045894	blue	-0.694346	0.00407633
CSS0041727.1	CSS0041727	blue	-0.693158	0.00416706
CSS0048367.1	CSS0048367	blue	-0.691106	0.00432738
CSS0010156.1	CSS0010156	blue	0.685388	0.00480027
CSS0039511.1	CSS0039511	blue	-0.684701	0.00485975
CSS0033878.1	CSS0033878	blue	-0.682333	0.00506924
CSS0027632.1	CSS0027632	blue	-0.682134	0.00508717
CSS0037482.1	CSS0037482	blue	-0.680189	0.00526495
CSS0046644.1	CSS0046644	blue	-0.678369	0.00543577
CSS0022417.1	CSS0022417	blue	-0.677931	0.00547755
CSS0016109.1	CSS0016109	blue	0.677169	0.00555078
CSS0009173.1	CSS0009173	blue	0.672674	0.00599876
CSS0024657.1	CSS0024657	blue	-0.669084	0.00637657
CSS0021710.1	CSS0021710	blue	-0.668283	0.00646341
CSS0040893.1	CSS0040893	blue	-0.668263	0.00646565
CSS0016494.1	CSS0016494	blue	-0.667085	0.00659498
CSS0026793.1	CSS0026793	blue	-0.666272	0.00668545
CSS0041024.1	CSS0041024	blue	-0.66464	0.00687014
CSS0000235.1	CSS0000235	blue	-0.661533	0.00723254
CSS0029454.1	CSS0029454	blue	-0.659216	0.00751258
CSS0014812.1	CSS0014812	blue	0.654198	0.0081482
CSS0036319.1	CSS0036319	blue	0.653782	0.00820269
CSS0043654.1	CSS0043654	blue	-0.652068	0.00843029
CSS0021830.1	CSS0021830	blue	-0.650439	0.00865123
CSS0025329.1	CSS0025329	blue	0.649943	0.00871941
CSS0044590.1	CSS0044590	blue	-0.649516	0.00877839
CSS0021005.1	CSS0021005	blue	-0.646981	0.00913529
CSS0040372.1	CSS0040372	blue	-0.645144	0.00940094
CSS0045220.1	CSS0045220	blue	-0.644358	0.00951634
CSS0038986.1	CSS0038986	blue	-0.644177	0.00954313
CSS0028750.1	CSS0028750	blue	0.64357	0.00963319
CSS0040128.1	CSS0040128	blue	-0.641905	0.00988392
CSS0018374.1	CSS0018374	blue	-0.641594	0.00993122
CSS0011386.1	CSS0011386	blue	-0.640274	0.0101343
CSS0022121.1	CSS0022121	blue	-0.6364	0.010749
CSS0012137.1	CSS0012137	blue	-0.634152	0.0111188
CSS0001350.1	CSS0001350	blue	-0.632191	0.0114494
CSS0007266.1	CSS0007266	blue	-0.631405	0.011584
CSS0002216.1	CSS0002216	blue	-0.63059	0.0117248
CSS0025509.1	CSS0025509	blue	-0.630388	0.0117599
CSS0046093.1	CSS0046093	blue	-0.62925	0.0119594
CSS0041210.2	CSS0041210	blue	0.629183	0.0119713
CSS0035756.1	CSS0035756	blue	-0.629016	0.0120007
CSS0014481.1	CSS0014481	blue	-0.627156	0.0123332
CSS0042322.1	CSS0042322	blue	-0.625938	0.0125548
CSS0014299.2	CSS0014299	blue	0.625761	0.0125873
CSS0007343.1	CSS0007343	blue	0.624074	0.0128997
CSS0026689.1	CSS0026689	blue	-0.623574	0.0129935
CSS0031932.1	CSS0031932	blue	-0.621403	0.013407
CSS0009723.1	CSS0009723	blue	-0.620839	0.013516
CSS0045305.1	CSS0045305	blue	-0.620542	0.0135738
CSS0006453.1	CSS0006453	blue	-0.619555	0.0137667
CSS0015965.1	CSS0015965	blue	-0.618758	0.0139243
CSS0032620.1	CSS0032620	blue	-0.618575	0.0139606
CSS0027946.1	CSS0027946	blue	-0.617857	0.014104
CSS0003345.1	CSS0003345	blue	-0.617514	0.0141727
CSS0022547.1	CSS0022547	blue	-0.617245	0.014227
CSS0041106.2	CSS0041106	blue	-0.616846	0.0143078
CSS0036486.1	CSS0036486	blue	0.61648	0.014382
CSS0050498.1	CSS0050498	blue	-0.616296	0.0144196
CSS0006197.1	CSS0006197	blue	-0.615601	0.0145618
CSS0015486.1	CSS0015486	blue	-0.614525	0.0147842
CSS0013825.1	CSS0013825	blue	-0.612421	0.0152266
CSS0000639.1	CSS0000639	blue	0.611941	0.0153288
CSS0002272.1	CSS0002272	blue	-0.611911	0.0153353
CSS0003663.1	CSS0003663	blue	-0.611207	0.0154864
CSS0030029.1	CSS0030029	blue	-0.610776	0.0155796
CSS0020572.1	CSS0020572	blue	0.610336	0.015675
CSS0002276.1	CSS0002276	blue	-0.608677	0.0160389
CSS0025964.1	CSS0025964	blue	-0.608647	0.0160456
CSS0019466.1	CSS0019466	blue	-0.606916	0.0164325
CSS0043434.1	CSS0043434	blue	-0.606701	0.016481
CSS0012509.1	CSS0012509	blue	-0.606447	0.0165384
CSS0028123.1	CSS0028123	blue	-0.605859	0.0166722
CSS0019813.1	CSS0019813	blue	-0.605207	0.0168214
CSS0015063.1	CSS0015063	blue	-0.604773	0.0169213
CSS0037152.1	CSS0037152	blue	-0.603116	0.0173067
CSS0033339.1	CSS0033339	blue	-0.598913	0.0183151
CSS0030661.1	CSS0030661	blue	-0.59762	0.0186341
CSS0036410.1	CSS0036410	blue	-0.597257	0.0187246
CSS0019073.1	CSS0019073	blue	-0.597104	0.0187627
CSS0022256.1	CSS0022256	blue	0.597071	0.0187709
CSS0014920.1	CSS0014920	blue	-0.596255	0.0189756
CSS0019724.1	CSS0019724	blue	-0.596165	0.0189984
CSS0027351.1	CSS0027351	blue	-0.595303	0.0192167
CSS0008367.1	CSS0008367	blue	-0.594661	0.0193804
CSS0019758.1	CSS0019758	blue	-0.594168	0.0195069
CSS0015299.1	CSS0015299	blue	-0.589876	0.0206353
CSS0033998.1	CSS0033998	blue	0.589752	0.0206686
CSS0021326.1	CSS0021326	blue	0.589747	0.02067
CSS0017796.1	CSS0017796	blue	-0.588996	0.0208729
CSS0011662.1	CSS0011662	blue	-0.586915	0.0214425
CSS0028615.1	CSS0028615	blue	-0.586814	0.0214703
CSS0012190.2	CSS0012190	blue	-0.58565	0.0217946
CSS0047342.1	CSS0047342	blue	-0.585252	0.0219061
CSS0029843.1	CSS0029843	blue	-0.584982	0.0219823
CSS0020275.1	CSS0020275	blue	-0.583419	0.0224261
CSS0027996.1	CSS0027996	blue	-0.582658	0.0226449
CSS0017601.1	CSS0017601	blue	0.582629	0.0226531
CSS0042682.1	CSS0042682	blue	-0.580103	0.0233907
CSS0039477.1	CSS0039477	blue	-0.579933	0.023441
CSS0048177.1	CSS0048177	blue	-0.579313	0.0236249
CSS0004502.1	CSS0004502	blue	0.579031	0.0237091
CSS0015824.1	CSS0015824	blue	-0.576852	0.0243666
CSS0024258.1	CSS0024258	blue	0.576157	0.0245791
CSS0024826.1	CSS0024826	blue	-0.576039	0.0246153
CSS0049657.2	CSS0049657	blue	-0.574542	0.0250787
CSS0037424.1	CSS0037424	blue	-0.574266	0.0251648
CSS0010452.1	CSS0010452	blue	-0.573979	0.0252546
CSS0025730.1	CSS0025730	blue	0.573225	0.0254917
CSS0010501.1	CSS0010501	blue	-0.573066	0.0255419
CSS0006379.1	CSS0006379	blue	-0.572599	0.0256896
CSS0001741.1	CSS0001741	blue	-0.571753	0.0259593
CSS0000804.1	CSS0000804	blue	-0.571676	0.025984
CSS0045757.1	CSS0045757	blue	-0.570866	0.0262442
CSS0037776.1	CSS0037776	blue	-0.569237	0.0267735
CSS0045632.1	CSS0045632	blue	-0.568747	0.0269343
CSS0002401.1	CSS0002401	blue	-0.568586	0.0269876
CSS0027485.1	CSS0027485	blue	-0.56807	0.0271578
CSS0033261.1	CSS0033261	blue	-0.567701	0.0272802
CSS0032418.1	CSS0032418	blue	0.565407	0.0280503
CSS0026829.1	CSS0026829	blue	-0.563105	0.0288393
CSS0030384.1	CSS0030384	blue	-0.562727	0.0289705
CSS0019082.1	CSS0019082	blue	-0.562696	0.0289812
CSS0039830.1	CSS0039830	blue	-0.562448	0.0290676
CSS0018764.1	CSS0018764	blue	-0.562216	0.0291486
CSS0009149.1	CSS0009149	blue	-0.561739	0.0293153
CSS0008741.1	CSS0008741	blue	-0.561392	0.0294372
CSS0047043.1	CSS0047043	blue	-0.561392	0.0294372
CSS0015341.2	CSS0015341	blue	-0.561173	0.0295145
CSS0042853.1	CSS0042853	blue	-0.559758	0.0300166
CSS0000653.1	CSS0000653	blue	-0.558782	0.0303663
CSS0015823.1	CSS0015823	blue	0.558673	0.0304058
CSS0036490.1	CSS0036490	blue	-0.558097	0.0306137
CSS0022243.1	CSS0022243	blue	-0.557263	0.0309172
CSS0032758.1	CSS0032758	blue	-0.556835	0.0310737
CSS0024031.1	CSS0024031	blue	-0.556266	0.0312828
CSS0028058.1	CSS0028058	blue	-0.555312	0.0316356
CSS0026202.1	CSS0026202	blue	-0.554679	0.0318715
CSS0028060.1	CSS0028060	blue	-0.55355	0.0322952
CSS0049930.2	CSS0049930	blue	0.5534	0.0323517
CSS0027503.1	CSS0027503	blue	-0.553322	0.0323811
CSS0032700.1	CSS0032700	blue	-0.552832	0.0325668
CSS0044503.1	CSS0044503	blue	-0.552594	0.0326573
CSS0014069.1	CSS0014069	blue	-0.550022	0.0336468
CSS0035972.1	CSS0035972	blue	-0.549861	0.0337093
CSS0050025.1	CSS0050025	blue	-0.549857	0.0337112
CSS0019309.2	CSS0019309	blue	-0.549115	0.0340011
CSS0022274.1	CSS0022274	blue	-0.548087	0.0344059
CSS0002536.1	CSS0002536	blue	-0.547516	0.0346324
CSS0045182.1	CSS0045182	blue	-0.547314	0.0347127
CSS0043095.1	CSS0043095	blue	-0.546959	0.0348545
CSS0005489.1	CSS0005489	blue	-0.546753	0.0349368
CSS0023294.1	CSS0023294	blue	-0.546426	0.0350677
CSS0031198.1	CSS0031198	blue	0.546396	0.0350796
CSS0007476.1	CSS0007476	blue	-0.546346	0.0350998
CSS0033076.1	CSS0033076	blue	-0.543748	0.0361548
CSS0028492.1	CSS0028492	blue	-0.542762	0.0365613
CSS0011575.1	CSS0011575	blue	-0.542737	0.0365713
CSS0049384.1	CSS0049384	blue	-0.542497	0.0366709
CSS0012997.1	CSS0012997	blue	-0.54231	0.0367487
CSS0032805.1	CSS0032805	blue	-0.542186	0.0368001
CSS0026855.1	CSS0026855	blue	-0.540784	0.0373871
CSS0033891.1	CSS0033891	blue	-0.540654	0.0374415
CSS0027711.1	CSS0027711	blue	-0.538786	0.0382352
CSS0003685.1	CSS0003685	blue	0.538558	0.0383327
CSS0019127.2	CSS0019127	blue	0.538286	0.0384498
CSS0010470.1	CSS0010470	blue	-0.538148	0.038509
CSS0034343.1	CSS0034343	blue	-0.537795	0.038661
CSS0013771.1	CSS0013771	blue	-0.537391	0.0388359
CSS0001530.1	CSS0001530	blue	-0.537054	0.038982
CSS0026300.1	CSS0026300	blue	-0.536496	0.0392248
CSS0009458.1	CSS0009458	blue	-0.53619	0.0393586
CSS0008472.1	CSS0008472	blue	-0.535401	0.0397049
CSS0014414.1	CSS0014414	blue	-0.535056	0.0398569
CSS0000210.1	CSS0000210	blue	0.53465	0.0400366
CSS0030760.1	CSS0030760	blue	-0.534023	0.040315
CSS0031815.1	CSS0031815	blue	-0.533698	0.0404596
CSS0037750.1	CSS0037750	blue	0.533574	0.0405153
CSS0039709.1	CSS0039709	blue	-0.532856	0.0408372
CSS0015924.1	CSS0015924	blue	-0.532039	0.0412055
CSS0012400.1	CSS0012400	blue	0.531034	0.0416622
CSS0021775.1	CSS0021775	blue	-0.530903	0.0417223
CSS0006123.1	CSS0006123	blue	0.53076	0.0417877
CSS0025631.1	CSS0025631	blue	-0.530557	0.0418805
CSS0018380.1	CSS0018380	blue	-0.529325	0.0424476
CSS0014025.1	CSS0014025	blue	-0.528875	0.0426561
CSS0050030.1	CSS0050030	blue	-0.52871	0.0427326
CSS0030564.1	CSS0030564	blue	0.528356	0.0428977
CSS0035574.1	CSS0035574	blue	-0.528084	0.0430245
CSS0007493.1	CSS0007493	blue	-0.527589	0.0432564
CSS0036794.1	CSS0036794	blue	-0.526255	0.0438859
CSS0018431.1	CSS0018431	blue	-0.526167	0.0439274
CSS0049685.1	CSS0049685	blue	-0.525736	0.0441321
CSS0048712.1	CSS0048712	blue	-0.525524	0.0442333
CSS0019366.1	CSS0019366	blue	-0.525057	0.0444564
CSS0003875.1	CSS0003875	blue	-0.524664	0.0446452
CSS0003140.1	CSS0003140	blue	-0.523456	0.0452282
CSS0040803.1	CSS0040803	blue	-0.523306	0.0453007
CSS0044632.1	CSS0044632	blue	-0.52311	0.0453963
CSS0029509.1	CSS0029509	blue	-0.521442	0.0462125
CSS0023143.1	CSS0023143	blue	-0.521041	0.0464105
CSS0014081.1	CSS0014081	blue	-0.520765	0.0465469
CSS0045793.1	CSS0045793	blue	-0.519976	0.0469392
CSS0025549.1	CSS0025549	blue	-0.519956	0.0469493
CSS0006403.1	CSS0006403	blue	-0.51979	0.0470319
CSS0041141.1	CSS0041141	blue	-0.519318	0.047268
CSS0005378.1	CSS0005378	blue	-0.518694	0.0475813
CSS0008983.1	CSS0008983	blue	-0.517426	0.0482229
CSS0030705.1	CSS0030705	blue	-0.517312	0.0482808
CSS0032183.1	CSS0032183	blue	-0.516756	0.0485647
CSS0037229.1	CSS0037229	blue	-0.516391	0.0487515
CSS0047153.1	CSS0047153	blue	-0.516356	0.0487694
CSS0011534.1	CSS0011534	blue	0.516186	0.0488563
CSS0000939.1	CSS0000939	blue	-0.515993	0.0489557
CSS0029374.1	CSS0029374	blue	-0.515142	0.0493946
CSS0014839.1	CSS0014839	blue	0.514882	0.0495293
CSS0047712.1	CSS0047712	blue	0.514882	0.0495293
CSS0042288.1	CSS0042288	blue	-0.514701	0.0496234
CSS0042227.1	CSS0042227	blue	-0.514528	0.0497129
CSS0018765.1	CSS0018765	blue	-0.514446	0.0497556
CSS0041960.1	CSS0041960	blue	-0.512671	0.0506856
CSS0003996.2	CSS0003996	blue	-0.512604	0.0507209
CSS0046165.1	CSS0046165	blue	-0.512333	0.0508642
CSS0015315.1	CSS0015315	blue	-0.512278	0.0508932
CSS0007194.1	CSS0007194	blue	-0.512263	0.0509011
CSS0008545.1	CSS0008545	blue	0.511736	0.0511804
CSS0032135.1	CSS0032135	blue	-0.511686	0.0512073
CSS0008081.1	CSS0008081	blue	-0.510943	0.0516032
CSS0027764.1	CSS0027764	blue	-0.51058	0.0517975
CSS0000695.1	CSS0000695	blue	-0.509613	0.0523173
CSS0006767.1	CSS0006767	blue	-0.509166	0.0525594
CSS0019369.2	CSS0019369	blue	0.509102	0.0525941
CSS0024661.1	CSS0024661	blue	0.508671	0.0528279
CSS0034222.1	CSS0034222	blue	-0.508327	0.0530151
CSS0001845.1	CSS0001845	blue	-0.507909	0.0532437
CSS0012344.1	CSS0012344	blue	-0.507635	0.0533935
CSS0009686.1	CSS0009686	blue	0.507462	0.0534881
CSS0045225.1	CSS0045225	blue	-0.507294	0.0535807
CSS0033873.2	CSS0033873	blue	0.506706	0.0539041
CSS0010186.1	CSS0010186	blue	-0.506591	0.0539678
CSS0015563.1	CSS0015563	blue	-0.506524	0.0540051
CSS0033240.1	CSS0033240	blue	-0.506025	0.0542813
CSS0016670.1	CSS0016670	blue	-0.505978	0.0543071
CSS0006858.1	CSS0006858	blue	0.505367	0.0546472
CSS0029475.1	CSS0029475	blue	-0.505215	0.0547315
CSS0009065.1	CSS0009065	blue	-0.505004	0.0548498
CSS0029796.1	CSS0029796	blue	-0.504977	0.0548646
CSS0022396.1	CSS0022396	blue	-0.504922	0.0548955
CSS0042182.1	CSS0042182	blue	-0.503705	0.0555791
CSS0043555.1	CSS0043555	blue	-0.503692	0.0555864
CSS0010830.1	CSS0010830	blue	-0.503387	0.055759
CSS0006490.1	CSS0006490	blue	-0.502674	0.0561629
CSS0010337.1	CSS0010337	blue	-0.502276	0.0563899
CSS0012156.1	CSS0012156	blue	-0.502078	0.0565027
CSS0007276.2	CSS0007276	blue	0.501924	0.056591
CSS0000176.1	CSS0000176	blue	-0.501828	0.0566459
CSS0036391.1	CSS0036391	blue	0.501564	0.0567971
CSS0036680.1	CSS0036680	blue	-0.501368	0.0569096
CSS0013194.1	CSS0013194	blue	-0.50135	0.0569195
CSS0019515.1	CSS0019515	blue	-0.501246	0.0569798
CSS0013686.1	CSS0013686	blue	-0.500833	0.0572173
CSS0043281.2	CSS0043281	blue	-0.50083	0.0572189
CSS0032683.1	CSS0032683	blue	-0.500263	0.0575467
CSS0005381.1	CSS0005381	blue	-0.499481	0.0580005
CSS0030726.1	CSS0030726	blue	-0.499183	0.058174
CSS0039459.1	CSS0039459	blue	-0.499183	0.058174
CSS0016308.1	CSS0016308	blue	-0.49906	0.0582459
CSS0001574.1	CSS0001574	blue	-0.498598	0.0585159
CSS0041975.1	CSS0041975	blue	-0.498335	0.0586703
CSS0013067.1	CSS0013067	blue	-0.496953	0.0594858
CSS0032094.1	CSS0032094	blue	-0.496623	0.0596816
CSS0044534.1	CSS0044534	blue	-0.496507	0.0597508
CSS0041461.1	CSS0041461	blue	-0.49645	0.0597848
CSS0008404.1	CSS0008404	blue	-0.495713	0.0602244
CSS0019267.1	CSS0019267	blue	-0.495713	0.0602244
CSS0001923.1	CSS0001923	blue	-0.495431	0.0603937
CSS0026144.1	CSS0026144	blue	-0.495431	0.0603937
CSS0007595.1	CSS0007595	blue	-0.494975	0.0606671
CSS0030369.1	CSS0030369	blue	-0.494457	0.0609796
CSS0010449.1	CSS0010449	blue	-0.494383	0.0610239
CSS0045193.1	CSS0045193	blue	-0.494366	0.0610344
CSS0010545.1	CSS0010545	blue	0.494359	0.0610385
CSS0011201.1	CSS0011201	blue	-0.494026	0.0612399
CSS0030521.1	CSS0030521	blue	-0.493994	0.0612597
CSS0039480.1	CSS0039480	blue	0.493841	0.0613521
CSS0041830.1	CSS0041830	blue	-0.493761	0.0614009
CSS0044087.1	CSS0044087	blue	-0.493603	0.0614967
CSS0012105.1	CSS0012105	blue	-0.493526	0.0615434
CSS0048305.1	CSS0048305	blue	-0.493435	0.0615988
CSS0016644.1	CSS0016644	blue	-0.49342	0.061608
CSS0034299.1	CSS0034299	blue	-0.493416	0.0616104
CSS0035239.1	CSS0035239	blue	-0.493204	0.0617394
CSS0018144.1	CSS0018144	blue	-0.493086	0.0618114
CSS0026231.1	CSS0026231	blue	-0.492954	0.0618919
CSS0005947.1	CSS0005947	blue	-0.492914	0.0619163
CSS0036668.1	CSS0036668	blue	-0.492914	0.0619163
CSS0012707.1	CSS0012707	blue	-0.492434	0.0622099
CSS0004884.1	CSS0004884	blue	-0.492013	0.0624682
CSS0022958.1	CSS0022958	blue	-0.491639	0.062698
CSS0016409.1	CSS0016409	blue	-0.491193	0.0629732
CSS0028049.1	CSS0028049	blue	-0.490886	0.0631636
CSS0023528.1	CSS0023528	blue	-0.490867	0.0631755
CSS0003244.1	CSS0003244	blue	-0.490809	0.063211
CSS0014161.1	CSS0014161	blue	0.490568	0.0633605
CSS0039978.1	CSS0039978	blue	-0.489956	0.0637417
CSS0012696.1	CSS0012696	blue	-0.489839	0.0638145
CSS0031251.1	CSS0031251	blue	-0.489759	0.0638644
CSS0000385.1	CSS0000385	blue	-0.489277	0.064166
CSS0003174.1	CSS0003174	blue	-0.489159	0.0642398
CSS0034011.1	CSS0034011	blue	-0.489039	0.0643151
CSS0005327.1	CSS0005327	blue	-0.488362	0.064741
CSS0001823.1	CSS0001823	blue	-0.487763	0.0651197
CSS0020149.1	CSS0020149	blue	-0.487643	0.0651953
CSS0031640.1	CSS0031640	blue	-0.487423	0.0653351
CSS0031088.1	CSS0031088	blue	-0.487352	0.0653805
CSS0002554.1	CSS0002554	blue	-0.487339	0.0653886
CSS0034622.1	CSS0034622	blue	-0.487215	0.0654673
CSS0010922.1	CSS0010922	blue	-0.48713	0.0655212
CSS0036303.1	CSS0036303	blue	-0.487092	0.0655457
CSS0045684.1	CSS0045684	blue	-0.486902	0.0656662
CSS0029749.1	CSS0029749	blue	-0.486341	0.0660243
CSS0034475.1	CSS0034475	blue	0.486293	0.0660552
CSS0023989.1	CSS0023989	blue	-0.486183	0.0661255
CSS0004262.1	CSS0004262	blue	0.485843	0.0663436
CSS0000766.1	CSS0000766	blue	-0.485488	0.0665716
CSS0000903.1	CSS0000903	blue	-0.485118	0.0668101
CSS0012518.1	CSS0012518	blue	-0.485118	0.0668101
CSS0003820.1	CSS0003820	blue	-0.485106	0.0668176
CSS0006019.1	CSS0006019	blue	-0.485014	0.0668774
CSS0003035.1	CSS0003035	blue	-0.484993	0.0668911
CSS0015268.1	CSS0015268	blue	-0.48481	0.0670088
CSS0039382.1	CSS0039382	blue	0.484809	0.0670097
CSS0004766.1	CSS0004766	blue	0.484749	0.0670486
CSS0019102.1	CSS0019102	blue	-0.484662	0.0671046
CSS0025764.1	CSS0025764	blue	-0.484241	0.0673777
CSS0001730.1	CSS0001730	blue	-0.48371	0.0677232
CSS0015974.1	CSS0015974	blue	-0.483259	0.0680173
CSS0035189.1	CSS0035189	blue	-0.48311	0.0681148
CSS0008673.1	CSS0008673	blue	0.482932	0.0682314
CSS0001937.1	CSS0001937	blue	-0.482313	0.0686378
CSS0041067.1	CSS0041067	blue	0.482242	0.0686842
CSS0001364.1	CSS0001364	blue	-0.481971	0.068863
CSS0021071.1	CSS0021071	blue	-0.481591	0.0691137
CSS0001860.1	CSS0001860	blue	-0.481572	0.0691264
CSS0014649.1	CSS0014649	blue	0.481178	0.0693873
CSS0037443.1	CSS0037443	blue	-0.480296	0.0699736
CSS0036033.1	CSS0036033	blue	-0.480188	0.0700458
CSS0009595.1	CSS0009595	blue	-0.480019	0.0701584
CSS0022716.1	CSS0022716	blue	-0.478869	0.0709303
CSS0017936.1	CSS0017936	blue	-0.478787	0.0709855
CSS0011938.1	CSS0011938	blue	-0.478079	0.0714636
CSS0000522.1	CSS0000522	blue	-0.477801	0.0716524
CSS0027055.1	CSS0027055	blue	-0.477431	0.0719037
CSS0000716.1	CSS0000716	blue	-0.477323	0.0719773
CSS0034526.1	CSS0034526	blue	-0.47705	0.0721632
CSS0015744.1	CSS0015744	blue	-0.477031	0.0721761
CSS0018208.1	CSS0018208	blue	-0.476699	0.0724027
CSS0025003.1	CSS0025003	blue	-0.475691	0.073094
CSS0036189.1	CSS0036189	blue	0.475455	0.0732569
CSS0015325.1	CSS0015325	blue	-0.475399	0.0732953
CSS0007160.1	CSS0007160	blue	-0.474868	0.0736622
CSS0045698.1	CSS0045698	blue	0.474688	0.0737865
CSS0010046.1	CSS0010046	blue	-0.474593	0.0738528
CSS0014016.1	CSS0014016	blue	-0.473731	0.0744523
CSS0039528.1	CSS0039528	blue	-0.473443	0.0746529
CSS0031643.1	CSS0031643	blue	-0.473343	0.0747229
CSS0043850.1	CSS0043850	blue	-0.473041	0.0749348
CSS0027734.1	CSS0027734	blue	-0.472315	0.0754442
CSS0028210.1	CSS0028210	blue	0.471622	0.0759332
CSS0018402.1	CSS0018402	blue	-0.471426	0.0760724
CSS0043394.1	CSS0043394	blue	-0.471402	0.076089
CSS0042564.1	CSS0042564	blue	0.470698	0.0765889
CSS0022890.1	CSS0022890	blue	-0.470678	0.0766034
CSS0023689.1	CSS0023689	blue	-0.470531	0.0767083
CSS0010971.1	CSS0010971	blue	-0.470515	0.0767192
CSS0000034.1	CSS0000034	blue	-0.46849	0.0781721
CSS0014859.1	CSS0014859	blue	-0.468322	0.0782939
CSS0015545.1	CSS0015545	blue	-0.468071	0.078475
CSS0012836.1	CSS0012836	blue	-0.467947	0.0785651
CSS0027319.1	CSS0027319	blue	0.467876	0.0786162
CSS0032833.1	CSS0032833	blue	-0.467718	0.0787312
CSS0015948.1	CSS0015948	blue	-0.467625	0.0787988
CSS0035254.2	CSS0035254	blue	-0.467224	0.0790903
CSS0009572.1	CSS0009572	blue	0.467077	0.0791974
CSS0035228.1	CSS0035228	blue	-0.466984	0.0792653
CSS0037079.1	CSS0037079	blue	-0.466898	0.079328
CSS0020349.1	CSS0020349	blue	-0.466569	0.0795682
CSS0034747.1	CSS0034747	blue	-0.466474	0.079638
CSS0046372.1	CSS0046372	blue	-0.46644	0.079663
CSS0025009.1	CSS0025009	blue	0.464863	0.0808229
CSS0026968.1	CSS0026968	blue	0.464863	0.0808229
CSS0043465.1	CSS0043465	blue	-0.464805	0.0808664
CSS0018898.1	CSS0018898	blue	-0.464699	0.0809443
CSS0028172.1	CSS0028172	blue	-0.464613	0.0810086
CSS0005557.3	CSS0005557	blue	-0.464343	0.0812083
CSS0032729.1	CSS0032729	blue	-0.463402	0.0819093
CSS0016406.1	CSS0016406	blue	0.463162	0.0820879
CSS0011785.1	CSS0011785	blue	-0.462839	0.0823298
CSS0002082.1	CSS0002082	blue	-0.462443	0.0826271
CSS0036207.1	CSS0036207	blue	-0.462413	0.0826497
CSS0026583.1	CSS0026583	blue	-0.462229	0.0827882
CSS0034329.1	CSS0034329	blue	-0.462067	0.0829101
CSS0002606.1	CSS0002606	blue	-0.461906	0.0830314
CSS0024301.1	CSS0024301	blue	-0.461778	0.083128
CSS0046739.1	CSS0046739	blue	-0.460939	0.0837627
CSS0024832.1	CSS0024832	blue	-0.460617	0.0840072
CSS0034245.1	CSS0034245	blue	-0.460262	0.0842772
CSS0027059.1	CSS0027059	blue	-0.459695	0.0847105
CSS0029798.1	CSS0029798	blue	-0.459474	0.0848794
CSS0012456.1	CSS0012456	blue	-0.45904	0.0852124
CSS0019794.1	CSS0019794	blue	-0.458682	0.0854873
CSS0038841.1	CSS0038841	blue	-0.458324	0.0857636
CSS0029614.1	CSS0029614	blue	-0.458001	0.0860129
CSS0045978.1	CSS0045978	blue	-0.457818	0.0861544
CSS0029612.1	CSS0029612	blue	-0.457422	0.0864615
CSS0008944.1	CSS0008944	blue	-0.457354	0.0865142
CSS0002682.1	CSS0002682	blue	0.456849	0.0869071
CSS0009243.1	CSS0009243	blue	-0.456668	0.087048
CSS0022056.1	CSS0022056	blue	0.456086	0.0875028
CSS0027218.1	CSS0027218	blue	-0.456052	0.0875292
CSS0017365.1	CSS0017365	blue	-0.455395	0.0880442
CSS0026236.1	CSS0026236	blue	-0.455395	0.0880442
CSS0044112.1	CSS0044112	blue	-0.455324	0.0881
CSS0020849.1	CSS0020849	blue	-0.455099	0.088277
CSS0042330.1	CSS0042330	blue	-0.4544	0.0888292
CSS0007366.1	CSS0007366	blue	0.4543	0.0889077
CSS0031111.1	CSS0031111	blue	-0.453494	0.0895473
CSS0035510.1	CSS0035510	blue	-0.452575	0.0902806
CSS0006211.1	CSS0006211	blue	0.451957	0.0907762
CSS0036840.1	CSS0036840	blue	-0.451954	0.0907784
CSS0011889.1	CSS0011889	blue	-0.451238	0.0913545
CSS0005621.1	CSS0005621	blue	-0.451029	0.0915233
CSS0035613.1	CSS0035613	blue	0.450997	0.0915493
CSS0041351.1	CSS0041351	blue	-0.450658	0.0918238
CSS0001546.1	CSS0001546	blue	-0.450591	0.0918775
CSS0006916.1	CSS0006916	blue	-0.450573	0.0918923
CSS0006458.1	CSS0006458	blue	-0.450518	0.0919371
CSS0036406.1	CSS0036406	blue	-0.450126	0.0922549
CSS0031992.1	CSS0031992	blue	-0.449804	0.092517
CSS0049874.1	CSS0049874	blue	-0.4498	0.0925198
CSS0049285.1	CSS0049285	blue	-0.449717	0.0925878
CSS0025639.1	CSS0025639	blue	-0.449571	0.0927064
CSS0031314.1	CSS0031314	blue	0.448143	0.0938758
CSS0039173.1	CSS0039173	blue	-0.448106	0.0939064
CSS0023577.1	CSS0023577	blue	-0.447651	0.0942811
CSS0035296.1	CSS0035296	blue	-0.44712	0.0947195
CSS0008618.1	CSS0008618	blue	-0.447092	0.0947434
CSS0022537.1	CSS0022537	blue	-0.447092	0.0947434
CSS0000748.1	CSS0000748	blue	-0.446485	0.0952465
CSS0025160.1	CSS0025160	blue	-0.445993	0.0956557
CSS0024605.1	CSS0024605	blue	-0.445617	0.0959695
CSS0017296.1	CSS0017296	blue	0.445528	0.0960435
CSS0006944.1	CSS0006944	blue	-0.445194	0.0963229
CSS0004378.1	CSS0004378	blue	0.444749	0.0966962
CSS0040367.1	CSS0040367	blue	-0.444492	0.0969124
CSS0011225.1	CSS0011225	blue	-0.443503	0.0977464
CSS0023356.1	CSS0023356	blue	-0.443465	0.0977786
CSS0005699.1	CSS0005699	blue	-0.443418	0.0978189
CSS0036077.1	CSS0036077	blue	-0.443386	0.0978456
CSS0004570.1	CSS0004570	blue	-0.443209	0.0979959
CSS0045338.1	CSS0045338	blue	-0.44293	0.0982322
CSS0043568.1	CSS0043568	blue	-0.442767	0.098371
CSS0048612.1	CSS0048612	blue	-0.442658	0.0984634
CSS0044524.1	CSS0044524	blue	-0.442552	0.0985536
CSS0041799.2	CSS0041799	blue	-0.442407	0.0986768
CSS0039094.1	CSS0039094	blue	-0.44202	0.0990068
CSS0016913.1	CSS0016913	blue	-0.441518	0.0994365
CSS0027950.1	CSS0027950	blue	-0.441386	0.0995488
CSS0026100.1	CSS0026100	blue	-0.441255	0.0996616
CSS0046570.1	CSS0046570	blue	-0.441255	0.0996616
CSS0006108.1	CSS0006108	blue	-0.441	0.0998804
CSS0021336.1	CSS0021336	blue	-0.440918	0.0999513
CSS0011811.1	CSS0011811	blue	-0.440679	0.100156
CSS0026334.1	CSS0026334	blue	-0.440633	0.100196
CSS0032698.1	CSS0032698	blue	-0.440356	0.100435
CSS0023587.1	CSS0023587	blue	0.439774	0.100937
CSS0007230.1	CSS0007230	blue	-0.43939	0.10127
CSS0012311.1	CSS0012311	blue	-0.438824	0.101762
CSS0045508.1	CSS0045508	blue	-0.438772	0.101807
CSS0019406.1	CSS0019406	blue	-0.438611	0.101948
CSS0017831.1	CSS0017831	blue	-0.438165	0.102337
CSS0012029.1	CSS0012029	blue	-0.438163	0.102338
CSS0001059.1	CSS0001059	blue	-0.43722	0.103165
CSS0019918.1	CSS0019918	blue	0.437018	0.103342
CSS0020725.1	CSS0020725	blue	-0.436393	0.103893
CSS0002417.1	CSS0002417	blue	-0.436255	0.104014
CSS0014088.1	CSS0014088	blue	-0.436185	0.104077
CSS0049130.1	CSS0049130	blue	-0.436022	0.104221
CSS0024517.1	CSS0024517	blue	-0.435758	0.104455
CSS0031880.1	CSS0031880	blue	-0.435642	0.104558
CSS0027216.1	CSS0027216	blue	-0.435465	0.104715
CSS0010860.1	CSS0010860	blue	-0.435177	0.104971
CSS0023330.1	CSS0023330	blue	-0.435131	0.105011
CSS0032404.1	CSS0032404	blue	-0.434976	0.10515
CSS0048119.1	CSS0048119	blue	-0.434857	0.105255
CSS0031254.2	CSS0031254	blue	-0.43467	0.105422
CSS0008808.1	CSS0008808	blue	0.434568	0.105513
CSS0016473.1	CSS0016473	blue	-0.434499	0.105574
CSS0048295.1	CSS0048295	blue	-0.433928	0.106085
CSS0029735.1	CSS0029735	blue	-0.433746	0.106248
CSS0039672.1	CSS0039672	blue	-0.43318	0.106757
CSS0048758.1	CSS0048758	blue	0.432706	0.107184
CSS0009672.1	CSS0009672	blue	-0.432386	0.107474
CSS0026327.1	CSS0026327	blue	-0.431873	0.107937
CSS0004087.1	CSS0004087	blue	-0.431713	0.108082
CSS0004467.1	CSS0004467	blue	-0.431702	0.108093
CSS0049754.1	CSS0049754	blue	-0.431639	0.108149
CSS0020290.1	CSS0020290	blue	0.431353	0.10841
CSS0014056.1	CSS0014056	blue	-0.431206	0.108544
CSS0007687.1	CSS0007687	blue	-0.431174	0.108572
CSS0015561.1	CSS0015561	blue	-0.430424	0.109257
CSS0041358.1	CSS0041358	blue	-0.430416	0.109265
CSS0043453.1	CSS0043453	blue	-0.429899	0.109738
CSS0024803.1	CSS0024803	blue	-0.429465	0.110136
CSS0014878.1	CSS0014878	blue	-0.42905	0.110519
CSS0021058.1	CSS0021058	blue	0.428848	0.110705
CSS0007441.1	CSS0007441	blue	-0.428613	0.110922
CSS0048698.1	CSS0048698	blue	0.428612	0.110922
CSS0011856.1	CSS0011856	blue	-0.428334	0.11118
CSS0007846.1	CSS0007846	blue	-0.427907	0.111575
CSS0038201.1	CSS0038201	blue	-0.427563	0.111895
CSS0022920.3	CSS0022920	blue	-0.427489	0.111964
CSS0009092.1	CSS0009092	blue	-0.427454	0.111996
CSS0000613.1	CSS0000613	blue	-0.427063	0.11236
CSS0008789.1	CSS0008789	blue	-0.426981	0.112437
CSS0018181.1	CSS0018181	blue	0.426866	0.112544
CSS0027431.1	CSS0027431	blue	-0.426595	0.112798
CSS0012157.1	CSS0012157	blue	-0.42654	0.112849
CSS0029368.1	CSS0029368	blue	-0.426318	0.113056
CSS0007163.1	CSS0007163	blue	-0.426005	0.11335
CSS0022597.1	CSS0022597	blue	-0.42575	0.11359
CSS0031026.1	CSS0031026	blue	-0.425631	0.113701
CSS0039858.1	CSS0039858	blue	-0.425057	0.114242
CSS0041711.1	CSS0041711	blue	0.425052	0.114247
CSS0021347.1	CSS0021347	blue	-0.425015	0.114282
CSS0041566.1	CSS0041566	blue	-0.424824	0.114462
CSS0016746.1	CSS0016746	blue	-0.424814	0.114471
CSS0045115.1	CSS0045115	blue	0.424544	0.114726
CSS0013354.1	CSS0013354	blue	-0.424338	0.114922
CSS0006116.1	CSS0006116	blue	0.423958	0.115281
CSS0043992.1	CSS0043992	blue	0.423742	0.115487
CSS0020497.3	CSS0020497	blue	-0.42359	0.115631
CSS0033639.2	CSS0033639	blue	-0.423175	0.116027
CSS0048449.1	CSS0048449	blue	-0.422073	0.11708
CSS0011116.1	CSS0011116	blue	-0.42147	0.11766
CSS0037771.1	CSS0037771	blue	-0.421368	0.117758
CSS0018215.1	CSS0018215	blue	-0.42118	0.117939
CSS0047298.1	CSS0047298	blue	-0.42065	0.11845
CSS0004159.1	CSS0004159	blue	-0.420317	0.118773
CSS0020169.1	CSS0020169	blue	-0.420279	0.11881
CSS0009662.1	CSS0009662	blue	-0.419865	0.119211
CSS0032078.1	CSS0032078	blue	-0.419709	0.119363
CSS0038276.1	CSS0038276	blue	-0.419278	0.119783
CSS0006983.1	CSS0006983	blue	-0.41925	0.11981
CSS0027866.1	CSS0027866	blue	0.419248	0.119812
CSS0048465.1	CSS0048465	blue	-0.418485	0.120557
CSS0041308.1	CSS0041308	blue	-0.418205	0.120831
CSS0017183.1	CSS0017183	blue	-0.417851	0.121178
CSS0048737.1	CSS0048737	blue	0.417729	0.121298
CSS0045326.1	CSS0045326	blue	0.41695	0.122066
CSS0011552.1	CSS0011552	blue	-0.416764	0.12225
CSS0001625.1	CSS0001625	blue	-0.416535	0.122476
CSS0033447.1	CSS0033447	blue	-0.41647	0.12254
CSS0009368.1	CSS0009368	blue	-0.416293	0.122716
CSS0022194.1	CSS0022194	blue	0.416158	0.122849
CSS0041306.1	CSS0041306	blue	-0.416035	0.122971
CSS0039092.1	CSS0039092	blue	0.415904	0.123101
CSS0041152.1	CSS0041152	blue	-0.415796	0.123209
CSS0045116.1	CSS0045116	blue	0.415391	0.123611
CSS0023510.1	CSS0023510	blue	-0.415269	0.123733
CSS0041144.1	CSS0041144	blue	0.415193	0.123809
CSS0005091.1	CSS0005091	blue	-0.415181	0.123821
CSS0022614.1	CSS0022614	blue	-0.414868	0.124133
CSS0033249.1	CSS0033249	blue	-0.414758	0.124243
CSS0009883.1	CSS0009883	blue	-0.414443	0.124558
CSS0028538.1	CSS0028538	blue	-0.414038	0.124964
CSS0027260.1	CSS0027260	blue	-0.413759	0.125244
CSS0015479.1	CSS0015479	blue	-0.412668	0.126343
CSS0034718.1	CSS0034718	blue	-0.412561	0.126452
CSS0044227.1	CSS0044227	blue	-0.412239	0.126777
CSS0047557.1	CSS0047557	blue	0.412045	0.126974
CSS0012483.1	CSS0012483	blue	0.411726	0.127297
CSS0023447.1	CSS0023447	blue	-0.411215	0.127818
CSS0016281.1	CSS0016281	blue	0.411036	0.128
CSS0045830.1	CSS0045830	blue	-0.410744	0.128298
CSS0048820.1	CSS0048820	blue	0.410586	0.12846
CSS0035930.1	CSS0035930	blue	-0.410112	0.128945
CSS0034374.1	CSS0034374	blue	-0.409586	0.129485
CSS0025977.1	CSS0025977	blue	-0.409207	0.129875
CSS0042959.1	CSS0042959	blue	-0.408775	0.130321
CSS0008191.1	CSS0008191	blue	-0.408481	0.130624
CSS0043271.1	CSS0043271	blue	-0.408479	0.130626
CSS0024905.1	CSS0024905	blue	-0.408435	0.130671
CSS0000622.1	CSS0000622	blue	-0.408416	0.130691
CSS0040505.1	CSS0040505	blue	-0.40827	0.130843
CSS0016433.1	CSS0016433	blue	-0.407633	0.131503
CSS0009648.1	CSS0009648	blue	-0.407225	0.131927
CSS0002719.1	CSS0002719	blue	-0.407157	0.131998
CSS0042949.1	CSS0042949	blue	-0.407111	0.132046
CSS0029500.1	CSS0029500	blue	-0.406962	0.132201
CSS0049117.2	CSS0049117	blue	0.406287	0.132907
CSS0037844.1	CSS0037844	blue	-0.405941	0.133268
CSS0009913.1	CSS0009913	blue	-0.405934	0.133276
CSS0021705.1	CSS0021705	blue	-0.404718	0.134555
CSS0013401.1	CSS0013401	blue	-0.404628	0.134649
CSS0030674.1	CSS0030674	blue	-0.404439	0.134849
CSS0013978.1	CSS0013978	blue	-0.404356	0.134936
CSS0031257.1	CSS0031257	blue	0.404324	0.13497
CSS0031753.1	CSS0031753	blue	-0.404253	0.135046
CSS0032415.1	CSS0032415	blue	-0.404126	0.13518
CSS0030038.1	CSS0030038	blue	-0.404064	0.135245
CSS0026600.1	CSS0026600	blue	-0.403986	0.135329
CSS0040492.1	CSS0040492	blue	-0.402925	0.136456
CSS0024765.1	CSS0024765	blue	0.402876	0.136507
CSS0001412.1	CSS0001412	blue	-0.402625	0.136775
CSS0000214.1	CSS0000214	blue	-0.402557	0.136847
CSS0015967.1	CSS0015967	blue	-0.402378	0.137038
CSS0020324.1	CSS0020324	blue	0.4023	0.137122
CSS0021311.1	CSS0021311	blue	0.4023	0.137122
CSS0016539.1	CSS0016539	blue	-0.401718	0.137745
CSS0019432.1	CSS0019432	blue	-0.401477	0.138004
CSS0024014.1	CSS0024014	blue	-0.401278	0.138218
CSS0028525.1	CSS0028525	blue	-0.400727	0.13881
CSS0031344.1	CSS0031344	blue	-0.400727	0.13881
CSS0020804.1	CSS0020804	blue	-0.400551	0.139
CSS0022485.1	CSS0022485	blue	-0.400467	0.139091
CSS0012511.1	CSS0012511	blue	-0.400041	0.139551
CSS0029517.1	CSS0029517	blue	0.399878	0.139727
CSS0020698.1	CSS0020698	blue	0.399055	0.14062
CSS0027961.1	CSS0027961	blue	-0.398624	0.141089
CSS0017168.1	CSS0017168	blue	-0.398503	0.141221
CSS0017951.1	CSS0017951	blue	0.397728	0.142067
CSS0008871.1	CSS0008871	blue	0.397605	0.142203
CSS0020358.1	CSS0020358	blue	-0.397311	0.142524
CSS0003147.1	CSS0003147	blue	-0.397162	0.142688
CSS0013568.1	CSS0013568	blue	-0.39685	0.14303
CSS0031234.1	CSS0031234	blue	0.396733	0.143159
CSS0019989.1	CSS0019989	blue	-0.396645	0.143256
CSS0026044.1	CSS0026044	blue	-0.395856	0.144126
CSS0028986.1	CSS0028986	blue	-0.395856	0.144126
CSS0037388.1	CSS0037388	blue	-0.395825	0.144161
CSS0026554.1	CSS0026554	blue	-0.395507	0.144513
CSS0020935.1	CSS0020935	blue	-0.395485	0.144537
CSS0016599.1	CSS0016599	blue	-0.395008	0.145065
CSS0005315.1	CSS0005315	blue	-0.39486	0.14523
CSS0018015.1	CSS0018015	blue	-0.394728	0.145377
CSS0043529.1	CSS0043529	blue	0.394691	0.145418
CSS0009379.1	CSS0009379	blue	-0.394146	0.146025
CSS0036546.1	CSS0036546	blue	-0.394146	0.146025
CSS0017167.1	CSS0017167	blue	0.394071	0.146109
CSS0050322.1	CSS0050322	blue	-0.393488	0.146759
CSS0002541.1	CSS0002541	blue	-0.393237	0.14704
CSS0041346.1	CSS0041346	blue	-0.393203	0.147078
CSS0030337.1	CSS0030337	blue	-0.393075	0.147222
CSS0007785.1	CSS0007785	blue	-0.392865	0.147457
CSS0009701.1	CSS0009701	blue	-0.392	0.148431
CSS0011650.1	CSS0011650	blue	-0.391958	0.148478
CSS0025697.1	CSS0025697	blue	-0.391433	0.149071
CSS0044038.1	CSS0044038	blue	-0.390969	0.149596
CSS0003447.1	CSS0003447	blue	0.390934	0.149636
CSS0036309.1	CSS0036309	blue	-0.390607	0.150007
CSS0006299.1	CSS0006299	blue	0.39056	0.150061
CSS0019283.2	CSS0019283	blue	-0.390491	0.150138
CSS0031299.1	CSS0031299	blue	-0.39046	0.150174
CSS0014848.1	CSS0014848	blue	0.390454	0.150181
CSS0009692.1	CSS0009692	blue	-0.390317	0.150337
CSS0021324.1	CSS0021324	blue	-0.389705	0.151034
CSS0012842.1	CSS0012842	blue	-0.389466	0.151306
CSS0007558.1	CSS0007558	blue	-0.389401	0.15138
CSS0027531.1	CSS0027531	blue	-0.389116	0.151706
CSS0028578.1	CSS0028578	blue	-0.388014	0.15297
CSS0024374.1	CSS0024374	blue	-0.387847	0.153162
CSS0000831.1	CSS0000831	blue	-0.387386	0.153694
CSS0026570.1	CSS0026570	blue	-0.386365	0.154874
CSS0035630.1	CSS0035630	blue	-0.385966	0.155338
CSS0048186.1	CSS0048186	blue	0.385944	0.155364
CSS0033139.1	CSS0033139	blue	-0.385448	0.155941
CSS0019403.1	CSS0019403	blue	-0.385362	0.156041
CSS0028031.1	CSS0028031	blue	-0.385118	0.156326
CSS0046383.1	CSS0046383	blue	-0.38496	0.15651
CSS0022634.1	CSS0022634	blue	-0.384911	0.156567
CSS0046495.1	CSS0046495	blue	-0.384621	0.156906
CSS0027676.1	CSS0027676	blue	-0.384582	0.156953
CSS0046716.1	CSS0046716	blue	0.384236	0.157357
CSS0050230.1	CSS0050230	blue	-0.383971	0.157668
CSS0020328.1	CSS0020328	blue	0.383836	0.157827
CSS0010741.1	CSS0010741	blue	-0.383601	0.158103
CSS0041600.1	CSS0041600	blue	-0.383016	0.158792
CSS0043155.1	CSS0043155	blue	-0.382732	0.159127
CSS0017286.1	CSS0017286	blue	-0.382701	0.159163
CSS0034778.1	CSS0034778	blue	0.382526	0.15937
CSS0031752.1	CSS0031752	blue	-0.382405	0.159514
CSS0050493.1	CSS0050493	blue	-0.38226	0.159685
CSS0018649.1	CSS0018649	blue	-0.382251	0.159695
CSS0046714.1	CSS0046714	blue	-0.382231	0.159719
CSS0005148.1	CSS0005148	blue	-0.382161	0.159802
CSS0005232.1	CSS0005232	blue	-0.381889	0.160125
CSS0036916.1	CSS0036916	blue	-0.381765	0.160272
CSS0029111.1	CSS0029111	blue	0.381658	0.160398
CSS0012750.1	CSS0012750	blue	-0.380689	0.161552
CSS0038747.1	CSS0038747	blue	-0.379642	0.162804
CSS0004432.1	CSS0004432	blue	-0.379322	0.163188
CSS0014172.1	CSS0014172	blue	-0.379307	0.163206
CSS0026415.1	CSS0026415	blue	-0.379031	0.163537
CSS0002546.1	CSS0002546	blue	0.378434	0.164256
CSS0041582.1	CSS0041582	blue	-0.378407	0.164289
CSS0045417.1	CSS0045417	blue	-0.378321	0.164392
CSS0007950.1	CSS0007950	blue	0.378112	0.164645
CSS0004253.1	CSS0004253	blue	-0.377993	0.164789
CSS0042041.1	CSS0042041	blue	-0.377328	0.165594
CSS0017687.1	CSS0017687	blue	-0.377051	0.16593
CSS0003085.1	CSS0003085	blue	-0.376765	0.166278
CSS0037757.1	CSS0037757	blue	-0.376612	0.166464
CSS0030776.1	CSS0030776	blue	-0.376581	0.166502
CSS0025991.1	CSS0025991	blue	-0.376575	0.166509
CSS0020297.1	CSS0020297	blue	-0.37645	0.166661
CSS0029600.1	CSS0029600	blue	-0.376404	0.166717
CSS0046283.1	CSS0046283	blue	-0.376349	0.166784
CSS0042983.1	CSS0042983	blue	-0.376141	0.167037
CSS0021093.1	CSS0021093	blue	-0.376078	0.167114
CSS0048165.1	CSS0048165	blue	-0.37589	0.167344
CSS0006191.1	CSS0006191	blue	-0.375816	0.167434
CSS0045888.1	CSS0045888	blue	-0.375733	0.167535
CSS0035458.1	CSS0035458	blue	-0.375636	0.167654
CSS0040897.1	CSS0040897	blue	-0.375526	0.167788
CSS0006212.1	CSS0006212	blue	-0.374816	0.168658
CSS0028405.4	CSS0028405	blue	-0.374763	0.168723
CSS0027109.1	CSS0027109	blue	-0.374626	0.168892
CSS0042584.1	CSS0042584	blue	-0.374577	0.168952
CSS0031268.1	CSS0031268	blue	-0.374252	0.169351
CSS0019976.1	CSS0019976	blue	-0.373931	0.169747
CSS0036488.1	CSS0036488	blue	0.373658	0.170084
CSS0000084.1	CSS0000084	blue	0.373547	0.17022
CSS0034041.1	CSS0034041	blue	-0.373412	0.170388
CSS0011314.1	CSS0011314	blue	0.373272	0.17056
CSS0038900.1	CSS0038900	blue	0.373272	0.17056
CSS0037742.1	CSS0037742	blue	0.373059	0.170824
CSS0013476.1	CSS0013476	blue	-0.37302	0.170872
CSS0004095.1	CSS0004095	blue	-0.373005	0.170891
CSS0006168.1	CSS0006168	blue	-0.372862	0.171067
CSS0045814.1	CSS0045814	blue	-0.372635	0.171349
CSS0005114.1	CSS0005114	blue	-0.372431	0.171602
CSS0035575.1	CSS0035575	blue	-0.37235	0.171702
CSS0009771.1	CSS0009771	blue	-0.372324	0.171735
CSS0030805.1	CSS0030805	blue	-0.37182	0.172362
CSS0015559.1	CSS0015559	blue	-0.371481	0.172784
CSS0038233.1	CSS0038233	blue	-0.371332	0.17297
CSS0044014.1	CSS0044014	blue	-0.37125	0.173072
CSS0027375.1	CSS0027375	blue	-0.37113	0.173223
CSS0032273.1	CSS0032273	blue	-0.371082	0.173283
CSS0028011.1	CSS0028011	blue	-0.371035	0.173341
CSS0006649.1	CSS0006649	blue	-0.370536	0.173966
CSS0032474.1	CSS0032474	blue	-0.37029	0.174274
CSS0033582.1	CSS0033582	blue	0.370243	0.174333
CSS0034009.1	CSS0034009	blue	-0.369865	0.174807
CSS0036833.1	CSS0036833	blue	0.369712	0.175
CSS0012355.1	CSS0012355	blue	-0.369693	0.175023
CSS0002575.1	CSS0002575	blue	-0.369595	0.175147
CSS0020343.1	CSS0020343	blue	-0.369423	0.175363
CSS0018592.1	CSS0018592	blue	0.36937	0.17543
CSS0012813.1	CSS0012813	blue	0.369365	0.175437
CSS0039161.1	CSS0039161	blue	-0.369102	0.175768
CSS0037898.1	CSS0037898	blue	-0.368878	0.17605
CSS0006615.1	CSS0006615	blue	-0.368824	0.176118
CSS0046375.1	CSS0046375	blue	-0.368649	0.17634
CSS0046629.1	CSS0046629	blue	-0.368174	0.17694
CSS0048515.1	CSS0048515	blue	-0.367846	0.177356
CSS0043507.1	CSS0043507	blue	-0.367845	0.177358
CSS0004110.1	CSS0004110	blue	-0.367789	0.177428
CSS0005507.1	CSS0005507	blue	-0.367783	0.177437
CSS0035783.1	CSS0035783	blue	-0.367666	0.177585
CSS0016540.1	CSS0016540	blue	-0.366958	0.178486
CSS0013069.1	CSS0013069	blue	-0.365758	0.180018
CSS0021102.1	CSS0021102	blue	-0.365691	0.180103
CSS0031926.1	CSS0031926	blue	-0.364662	0.181425
CSS0019094.1	CSS0019094	blue	-0.36446	0.181685
CSS0047012.1	CSS0047012	blue	-0.36446	0.181685
CSS0006950.1	CSS0006950	blue	-0.363946	0.182349
CSS0013066.1	CSS0013066	blue	-0.363897	0.182413
CSS0044678.2	CSS0044678	blue	-0.363036	0.183526
CSS0025533.1	CSS0025533	blue	-0.362882	0.183727
CSS0001451.1	CSS0001451	blue	-0.362862	0.183752
CSS0015512.2	CSS0015512	blue	-0.36231	0.18447
CSS0042599.1	CSS0042599	blue	-0.361941	0.184951
CSS0011268.1	CSS0011268	blue	-0.361858	0.185058
CSS0024185.1	CSS0024185	blue	-0.361641	0.185342
CSS0049595.1	CSS0049595	blue	-0.361192	0.185928
CSS0026136.1	CSS0026136	blue	-0.36102	0.186154
CSS0043943.1	CSS0043943	blue	0.360907	0.186302
CSS0049356.1	CSS0049356	blue	-0.36071	0.18656
CSS0020853.1	CSS0020853	blue	-0.360488	0.186852
CSS0047967.1	CSS0047967	blue	-0.360245	0.18717
CSS0002565.1	CSS0002565	blue	-0.360177	0.187259
CSS0007747.1	CSS0007747	blue	-0.360176	0.187261
CSS0005574.1	CSS0005574	blue	-0.360079	0.187389
CSS0000474.1	CSS0000474	blue	0.359889	0.187638
CSS0024011.1	CSS0024011	blue	-0.359496	0.188157
CSS0014594.1	CSS0014594	blue	-0.359477	0.188181
CSS0000032.1	CSS0000032	blue	-0.359102	0.188676
CSS0026289.1	CSS0026289	blue	-0.358876	0.188975
CSS0015473.1	CSS0015473	blue	0.358453	0.189534
CSS0027162.1	CSS0027162	blue	0.357987	0.190152
CSS0041356.1	CSS0041356	blue	-0.357796	0.190405
CSS0008298.1	CSS0008298	blue	-0.357598	0.190669
CSS0009677.1	CSS0009677	blue	-0.357488	0.190815
CSS0006287.1	CSS0006287	blue	-0.357282	0.191089
CSS0036462.1	CSS0036462	blue	-0.35636	0.19232
CSS0008017.1	CSS0008017	blue	0.355818	0.193045
CSS0003900.1	CSS0003900	blue	-0.355762	0.19312
CSS0025723.1	CSS0025723	blue	-0.35546	0.193525
CSS0031649.1	CSS0031649	blue	0.354975	0.194177
CSS0029182.1	CSS0029182	blue	-0.354968	0.194186
CSS0035684.1	CSS0035684	blue	-0.354892	0.194289
CSS0031859.1	CSS0031859	blue	-0.354638	0.194631
CSS0041395.1	CSS0041395	blue	0.354476	0.19485
CSS0035771.1	CSS0035771	blue	-0.354458	0.194874
CSS0036763.1	CSS0036763	blue	-0.354447	0.194888
CSS0010616.1	CSS0010616	blue	-0.354443	0.194895
CSS0031012.1	CSS0031012	blue	-0.35444	0.194898
CSS0034781.1	CSS0034781	blue	0.354252	0.195152
CSS0049260.1	CSS0049260	blue	-0.354197	0.195226
CSS0015194.1	CSS0015194	blue	0.354147	0.195294
CSS0027232.1	CSS0027232	blue	-0.354138	0.195305
CSS0047518.1	CSS0047518	blue	-0.353939	0.195574
CSS0029765.1	CSS0029765	blue	-0.353897	0.195632
CSS0033474.1	CSS0033474	blue	-0.353897	0.195632
CSS0036359.1	CSS0036359	blue	-0.353172	0.196613
CSS0025239.1	CSS0025239	blue	-0.352976	0.196879
CSS0042650.1	CSS0042650	blue	-0.352226	0.197899
CSS0007953.1	CSS0007953	blue	-0.351956	0.198267
CSS0030605.1	CSS0030605	blue	-0.350189	0.200685
CSS0044204.1	CSS0044204	blue	-0.350134	0.200761
CSS0044535.1	CSS0044535	blue	-0.349807	0.201211
CSS0009350.1	CSS0009350	blue	-0.349723	0.201327
CSS0040366.1	CSS0040366	blue	-0.349609	0.201483
CSS0017492.1	CSS0017492	blue	-0.349367	0.201817
CSS0033567.1	CSS0033567	blue	0.34918	0.202075
CSS0042294.1	CSS0042294	blue	-0.348629	0.202837
CSS0043175.1	CSS0043175	blue	-0.348479	0.203045
CSS0043745.1	CSS0043745	blue	-0.348479	0.203045
CSS0045031.1	CSS0045031	blue	-0.348006	0.2037
CSS0048608.1	CSS0048608	blue	-0.347417	0.204518
CSS0013313.1	CSS0013313	blue	-0.347369	0.204585
CSS0018654.1	CSS0018654	blue	-0.347164	0.20487
CSS0014984.1	CSS0014984	blue	-0.346933	0.205192
CSS0018940.1	CSS0018940	blue	-0.346659	0.205574
CSS0007416.1	CSS0007416	blue	-0.346569	0.2057
CSS0024922.1	CSS0024922	blue	0.346505	0.205789
CSS0006814.1	CSS0006814	blue	0.345591	0.207068
CSS0028442.1	CSS0028442	blue	-0.34547	0.207238
CSS0030219.1	CSS0030219	blue	-0.344711	0.208304
CSS0047466.1	CSS0047466	blue	0.344582	0.208486
CSS0023619.1	CSS0023619	blue	-0.344557	0.208521
CSS0002686.1	CSS0002686	blue	-0.34432	0.208855
CSS0030866.1	CSS0030866	blue	-0.34432	0.208855
CSS0005627.1	CSS0005627	blue	-0.344121	0.209136
CSS0032503.1	CSS0032503	blue	0.343652	0.209797
CSS0010388.4	CSS0010388	blue	-0.343648	0.209803
CSS0001402.1	CSS0001402	blue	-0.343611	0.209857
CSS0019438.1	CSS0019438	blue	-0.343556	0.209934
CSS0043928.1	CSS0043928	blue	0.343276	0.21033
CSS0032693.1	CSS0032693	blue	-0.342969	0.210766
CSS0038148.1	CSS0038148	blue	-0.342871	0.210904
CSS0034593.1	CSS0034593	blue	-0.342734	0.211099
CSS0014166.1	CSS0014166	blue	-0.342682	0.211172
CSS0033114.1	CSS0033114	blue	-0.342508	0.211419
CSS0033815.1	CSS0033815	blue	-0.342035	0.212092
CSS0004898.1	CSS0004898	blue	-0.341836	0.212375
CSS0024190.1	CSS0024190	blue	-0.341556	0.212774
CSS0011318.1	CSS0011318	blue	-0.341468	0.212901
CSS0016053.1	CSS0016053	blue	0.341341	0.213081
CSS0010244.1	CSS0010244	blue	0.341299	0.213142
CSS0032581.1	CSS0032581	blue	-0.341167	0.21333
CSS0007968.1	CSS0007968	blue	-0.341121	0.213396
CSS0016984.1	CSS0016984	blue	-0.341055	0.213491
CSS0001215.1	CSS0001215	blue	-0.340826	0.213818
CSS0026846.1	CSS0026846	blue	-0.340691	0.214011
CSS0008825.1	CSS0008825	blue	0.34062	0.214112
CSS0023079.1	CSS0023079	blue	-0.340612	0.214124
CSS0040917.1	CSS0040917	blue	-0.340385	0.214449
CSS0021570.1	CSS0021570	blue	-0.339999	0.215004
CSS0003442.1	CSS0003442	blue	-0.339759	0.215348
CSS0021281.1	CSS0021281	blue	-0.339736	0.215381
CSS0041637.1	CSS0041637	blue	0.339634	0.215528
CSS0047292.1	CSS0047292	blue	0.338982	0.216466
CSS0025303.1	CSS0025303	blue	-0.338369	0.217352
CSS0030041.1	CSS0030041	blue	-0.338076	0.217776
CSS0044085.1	CSS0044085	blue	-0.338076	0.217776
CSS0037912.1	CSS0037912	blue	-0.337934	0.217982
CSS0010698.1	CSS0010698	blue	-0.337599	0.218466
CSS0000137.1	CSS0000137	blue	0.337225	0.21901
CSS0015283.1	CSS0015283	blue	-0.337207	0.219035
CSS0019208.1	CSS0019208	blue	-0.336127	0.220609
CSS0023930.1	CSS0023930	blue	-0.335913	0.220922
CSS0042760.2	CSS0042760	blue	-0.3356	0.221379
CSS0000669.1	CSS0000669	blue	-0.335175	0.222
CSS0046458.1	CSS0046458	blue	-0.335175	0.222
CSS0007999.1	CSS0007999	blue	-0.334808	0.222539
CSS0018269.1	CSS0018269	blue	-0.334288	0.223303
CSS0029834.1	CSS0029834	blue	-0.334044	0.223663
CSS0047464.1	CSS0047464	blue	0.333568	0.224364
CSS0014471.1	CSS0014471	blue	-0.333317	0.224734
CSS0012110.1	CSS0012110	blue	-0.333251	0.224831
CSS0042379.1	CSS0042379	blue	-0.332653	0.225716
CSS0033402.1	CSS0033402	blue	-0.332452	0.226013
CSS0021313.1	CSS0021313	blue	0.33189	0.226847
CSS0020812.1	CSS0020812	blue	-0.331817	0.226956
CSS0016714.1	CSS0016714	blue	-0.331747	0.22706
CSS0043065.1	CSS0043065	blue	-0.331611	0.227262
CSS0019156.1	CSS0019156	blue	-0.330399	0.229069
CSS0031659.2	CSS0031659	blue	-0.330304	0.22921
CSS0038539.1	CSS0038539	blue	0.330202	0.229363
CSS0013458.1	CSS0013458	blue	-0.329524	0.230378
CSS0018884.1	CSS0018884	blue	-0.32939	0.23058
CSS0023446.1	CSS0023446	blue	-0.329188	0.230882
CSS0043086.1	CSS0043086	blue	-0.328997	0.231169
CSS0049840.1	CSS0049840	blue	-0.328595	0.231774
CSS0040804.1	CSS0040804	blue	0.328587	0.231786
CSS0036950.1	CSS0036950	blue	0.328323	0.232184
CSS0006785.2	CSS0006785	blue	-0.328315	0.232196
CSS0018686.1	CSS0018686	blue	-0.327991	0.232685
CSS0033480.1	CSS0033480	blue	0.32765	0.233199
CSS0016517.1	CSS0016517	blue	-0.327566	0.233326
CSS0044223.1	CSS0044223	blue	-0.327508	0.233414
CSS0029201.1	CSS0029201	blue	-0.327257	0.233793
CSS0043539.1	CSS0043539	blue	-0.327106	0.234022
[truncated: 25,256 more rows]

## Sheet: |correlation|≥0.85
From	Target	Correlation	p_val
CSS0043348.1	CSS0048676.1	0.925974	7.35423e-07
CSS0043348.1	CSS0029601.1	0.92003	1.19738e-06
CSS0043348.1	CSS0010544.1	0.919099	1.28793e-06
CSS0043348.1	CSS0024718.1	0.909929	2.53034e-06
CSS0043348.1	CSS0014070.1	0.909005	2.69773e-06
CSS0043348.1	CSS0037359.1	0.909005	2.69773e-06
CSS0043348.1	CSS0005127.1	0.907738	2.94232e-06
CSS0043348.1	CSS0007400.1	0.903532	3.89036e-06
CSS0043348.1	CSS0021470.1	0.903532	3.89036e-06
CSS0043348.1	CSS0010064.1	0.901332	4.48013e-06
CSS0043348.1	CSS0040488.1	0.900337	4.77022e-06
CSS0043348.1	CSS0049154.1	0.896744	5.95154e-06
CSS0043348.1	CSS0031892.1	0.891821	7.95806e-06
CSS0043348.1	CSS0033989.1	0.891821	7.95806e-06
CSS0043348.1	CSS0037645.1	0.891821	7.95806e-06
CSS0043348.1	CSS0029649.1	0.88777	1.00048e-05
CSS0043348.1	CSS0030069.1	0.887149	1.0354e-05
CSS0043348.1	CSS0010325.1	0.88542	1.138e-05
CSS0043348.1	CSS0036416.1	0.88542	1.138e-05
CSS0043348.1	CSS0047302.1	0.884586	1.19048e-05
CSS0043348.1	CSS0037081.1	0.880865	1.44964e-05
CSS0043348.1	CSS0013484.1	0.879844	1.52839e-05
CSS0043348.1	CSS0035805.1	0.879844	1.52839e-05
CSS0043348.1	CSS0032466.1	0.878442	1.64234e-05
CSS0043348.1	CSS0001753.1	0.878409	1.64511e-05
CSS0043348.1	CSS0027489.1	0.877997	1.67998e-05
CSS0043348.1	CSS0021531.1	0.877281	1.74197e-05
CSS0043348.1	CSS0030511.1	0.874446	2.00642e-05
CSS0043348.1	CSS0015472.1	0.87111	2.35942e-05
CSS0043348.1	CSS0013148.1	0.870507	2.4284e-05
CSS0043348.1	CSS0037210.1	0.869877	2.50225e-05
CSS0043348.1	CSS0039735.1	0.868278	2.69824e-05
CSS0043348.1	CSS0030122.1	0.864528	3.20789e-05
CSS0043348.1	CSS0015360.1	0.864232	3.25129e-05
CSS0043348.1	CSS0043620.1	0.861036	3.75176e-05
CSS0043348.1	CSS0013719.1	0.858706	4.15546e-05
CSS0043348.1	CSS0001949.1	0.858233	4.24173e-05
CSS0043348.1	CSS0020753.1	0.856477	4.57473e-05
CSS0043348.1	CSS0012013.1	0.854692	4.9351e-05
CSS0043348.1	CSS0012591.1	0.854083	5.06329e-05
CSS0043348.1	CSS0026761.1	0.853571	5.17327e-05
CSS0043348.1	CSS0025018.1	0.852151	5.4885e-05
CSS0043348.1	CSS0000068.1	0.850465	5.88307e-05
CSS0043348.1	CSS0025476.1	0.850427	5.89224e-05
CSS0043348.1	CSS0049510.2	-0.850797	5.80355e-05
CSS0043348.1	CSS0039923.1	-0.850809	5.80072e-05
CSS0043348.1	CSS0004217.1	-0.851184	5.71201e-05
CSS0043348.1	CSS0034464.1	-0.851708	5.58993e-05
CSS0043348.1	CSS0007756.1	-0.852228	5.47081e-05
CSS0043348.1	CSS0031017.1	-0.852497	5.41025e-05
CSS0043348.1	CSS0029097.1	-0.853692	5.14717e-05
CSS0043348.1	CSS0013341.1	-0.853727	5.13952e-05
CSS0043348.1	CSS0040819.2	-0.853883	5.10597e-05
CSS0043348.1	CSS0018368.1	-0.85415	5.04912e-05
CSS0043348.1	CSS0023468.1	-0.854796	4.91361e-05
CSS0043348.1	CSS0024496.1	-0.854979	4.87563e-05
CSS0043348.1	CSS0015632.1	-0.855057	4.85965e-05
CSS0043348.1	CSS0006718.1	-0.855234	4.82336e-05
CSS0043348.1	CSS0012786.1	-0.855642	4.74046e-05
CSS0043348.1	CSS0029478.1	-0.855782	4.71235e-05
CSS0043348.1	CSS0040060.1	-0.856043	4.66024e-05
CSS0043348.1	CSS0010705.1	-0.85668	4.53526e-05
CSS0043348.1	CSS0012395.1	-0.857626	4.35444e-05
CSS0043348.1	CSS0035043.1	-0.857843	4.31381e-05
CSS0043348.1	CSS0018512.1	-0.857906	4.30218e-05
CSS0043348.1	CSS0048619.1	-0.857913	4.30083e-05
CSS0043348.1	CSS0006750.1	-0.858116	4.26321e-05
CSS0043348.1	CSS0003349.1	-0.858358	4.21875e-05
CSS0043348.1	CSS0039752.1	-0.858573	4.1797e-05
CSS0043348.1	CSS0003013.1	-0.858704	4.15584e-05
CSS0043348.1	CSS0041915.1	-0.858915	4.11783e-05
CSS0043348.1	CSS0024671.1	-0.858997	4.10329e-05
CSS0043348.1	CSS0032471.1	-0.859279	4.05305e-05
CSS0043348.1	CSS0011589.1	-0.859552	4.00497e-05
CSS0043348.1	CSS0009250.1	-0.859756	3.96939e-05
CSS0043348.1	CSS0017124.1	-0.860408	3.85721e-05
CSS0043348.1	CSS0047583.1	-0.860706	3.80699e-05
CSS0043348.1	CSS0003285.1	-0.861139	3.7347e-05
CSS0043348.1	CSS0007877.1	-0.861139	3.7347e-05
CSS0043348.1	CSS0023435.1	-0.861431	3.68672e-05
CSS0043348.1	CSS0006237.1	-0.861449	3.68378e-05
CSS0043348.1	CSS0003753.1	-0.861516	3.67275e-05
CSS0043348.1	CSS0022516.1	-0.861703	3.64232e-05
CSS0043348.1	CSS0037157.1	-0.862097	3.57902e-05
CSS0043348.1	CSS0031309.1	-0.862131	3.57364e-05
CSS0043348.1	CSS0029437.1	-0.86287	3.45741e-05
CSS0043348.1	CSS0014921.1	-0.863182	3.40916e-05
CSS0043348.1	CSS0029378.1	-0.863216	3.40402e-05
CSS0043348.1	CSS0006997.1	-0.863914	3.29853e-05
CSS0043348.1	CSS0000143.1	-0.864268	3.24602e-05
CSS0043348.1	CSS0033948.1	-0.864277	3.24469e-05
CSS0043348.1	CSS0033716.1	-0.864849	3.16134e-05
CSS0043348.1	CSS0016965.2	-0.865735	3.03581e-05
CSS0043348.1	CSS0027364.1	-0.865926	3.00925e-05
CSS0043348.1	CSS0022717.1	-0.866166	2.9763e-05
CSS0043348.1	CSS0008911.1	-0.867131	2.84639e-05
CSS0043348.1	CSS0039976.1	-0.868267	2.69964e-05
CSS0043348.1	CSS0034539.1	-0.868556	2.66321e-05
CSS0043348.1	CSS0048547.2	-0.869841	2.50655e-05
CSS0043348.1	CSS0001062.1	-0.870193	2.46504e-05
CSS0043348.1	CSS0035361.1	-0.870398	2.44113e-05
CSS0043348.1	CSS0018192.1	-0.871203	2.34895e-05
CSS0043348.1	CSS0032185.1	-0.871451	2.32116e-05
CSS0043348.1	CSS0046130.1	-0.871668	2.29703e-05
CSS0043348.1	CSS0028923.1	-0.872576	2.19844e-05
CSS0043348.1	CSS0040648.1	-0.872696	2.18573e-05
CSS0043348.1	CSS0037585.1	-0.873796	2.07154e-05
CSS0043348.1	CSS0028419.1	-0.874372	2.01375e-05
CSS0043348.1	CSS0045267.1	-0.874775	1.97408e-05
CSS0043348.1	CSS0042963.1	-0.875529	1.90172e-05
CSS0043348.1	CSS0047898.1	-0.87784	1.69339e-05
CSS0043348.1	CSS0045173.1	-0.878546	1.63363e-05
CSS0043348.1	CSS0016183.1	-0.881525	1.40055e-05
CSS0043348.1	CSS0015670.1	-0.882997	1.296e-05
CSS0043348.1	CSS0013904.1	-0.883509	1.26115e-05
CSS0043348.1	CSS0046086.1	-0.889197	9.23869e-06
CSS0043348.1	CSS0044108.1	-0.891564	8.07656e-06
CSS0043348.1	CSS0001663.1	-0.894639	6.75052e-06
CSS0043348.1	CSS0028459.1	-0.897366	5.73145e-06
CSS0043348.1	CSS0049943.1	-0.897598	5.6508e-06
CSS0043348.1	CSS0050201.1	-0.897742	5.60139e-06
CSS0043348.1	CSS0007805.1	-0.899682	4.96949e-06
CSS0043348.1	CSS0012324.1	-0.899803	4.93234e-06
CSS0043348.1	CSS0028490.1	-0.900894	4.60603e-06
CSS0043348.1	CSS0006734.1	-0.901467	4.44192e-06
CSS0043348.1	CSS0001033.2	-0.90147	4.44112e-06
CSS0043348.1	CSS0038016.1	-0.90322	3.9699e-06
CSS0043348.1	CSS0030745.1	-0.908931	2.71154e-06
CSS0043348.1	CSS0004289.1	-0.910791	2.38218e-06
CSS0043348.1	CSS0041783.1	-0.919846	1.21483e-06
CSS0043348.1	CSS0008186.1	-0.921939	1.02814e-06
CSS0043348.1	CSS0014504.1	-0.931783	4.3855e-07
CSS0043348.1	CSS0037781.1	-0.960832	1.27793e-08

## Sheet: Tissue specific
Transcript ID	Gene ID	Apical bud	Flower	Fruit	Young leaf	Mature leaf	Old leaf	Root	Stem	High expression tissue
CSS0028923.1	CSS0028923	128.104	55.4186	120.231	104.703	109.344	48.6697	94.39	128.745	Stem
CSS0032185.1	CSS0032185	81.4155	272.755	104.321	62.6228	32.6768	9.88018	234.619	282.695	Stem
CSS0037157.1	CSS0037157	128.104	55.4186	120.231	104.703	109.344	48.6697	94.39	128.745	Stem
CSS0001062.1	CSS0001062	81.4155	272.755	104.321	62.6228	32.6768	9.88018	234.619	282.695	Stem
CSS0029437.1	CSS0029437	907.954	201.257	112.875	719.352	361.487	77.4136	554.804	940.056	Stem
CSS0034464.1	CSS0034464	60.8113	47.4443	44.9177	69.1019	59.7668	19.7343	58.618	113.13	Stem
CSS0033716.1	CSS0033716	31.2839	17.7966	14.9238	27.9904	28.9275	18.5591	15.6386	32.7868	Stem
CSS0032471.1	CSS0032471	2.4855	9.77208	9.26685	0.882735	0.16705	0.026115	2.73211	18.2	Stem
CSS0013484.1	CSS0013484	17.9606	49.5936	17.9762	10.6014	30.8857	60.3779	19.634	65.5641	Stem
CSS0035805.1	CSS0035805	17.9606	49.5936	17.9762	10.6014	30.8857	60.3779	19.634	65.5641	Stem
CSS0046086.1	CSS0046086	141.48	149.423	92.2939	151.076	158.846	68.0558	105.681	184.94	Stem
CSS0000143.1	CSS0000143	1.54575	1.97852	0.118806	0.754182	0.798128	0.974961	2.32082	2.46958	Stem
CSS0024671.1	CSS0024671	8.72999	9.8926	13.1509	6.08488	12.3895	13.5711	10.5269	14.5484	Stem
CSS0046130.1	CSS0046130	7.75511	29.3865	35.066	8.30457	5.2992	0.853091	39.787	43.0591	Stem
CSS0015670.1	CSS0015670	12.9106	11.8309	11.8075	12.8211	9.37336	7.15552	9.65542	15.2019	Stem
CSS0030069.1	CSS0030069	853.862	191.073	690.445	642.571	757.674	478.819	300.542	857.531	Stem
CSS0007805.1	CSS0007805	412.259	209.633	126.693	377.948	373.914	213.081	274.699	665.855	Stem
CSS0018192.1	CSS0018192	0.298611	0.391687	2.39439	0.291388	0.389783	0.026115	6.71766	1.94107	Root
CSS0024718.1	CSS0024718	11.0223	4.98145	0.685418	1.69691	1.45705	1.92381	106.709	7.81234	Root
CSS0049943.1	CSS0049943	0	0	0	0.0428512	0.0464028	0	4.52414	0	Root
CSS0041915.1	CSS0041915	0.140523	0.210908	2.54062	0.111413	0.213453	0.113165	18.6743	2.6906	Root
CSS0015472.1	CSS0015472	0.421569	0.220951	2.92445	0.454223	0.99302	1.34928	10.2234	1.47983	Root
CSS0037081.1	CSS0037081	0.0526961	0.230995	0.0456945	0	0.157769	0.0696401	5.89509	0.0480464	Root
CSS0047898.1	CSS0047898	0.447917	2.19947	0.173639	0.291388	0.0371222	0	9.88064	1.47983	Root
CSS0006997.1	CSS0006997	0.368873	0.451946	4.0394	0.102843	0.454747	0.583236	4.89626	1.95068	Root
CSS0013719.1	CSS0013719	2.54698	0	0	1.27697	0	0	8.99932	2.6906	Root
CSS0012324.1	CSS0012324	0.0526961	0.100432	0	0.548496	0.0649639	0	11.7608	0	Root
CSS0016965.2	CSS0016965	20.8413	14.9142	35.7149	17.4062	24.9183	12.1609	41.7748	27.7324	Root
CSS0001949.1	CSS0001949	5.71753	3.81643	13.0869	12.4354	8.86293	9.77572	36.2617	19.0167	Root
CSS0003753.1	CSS0003753	1.28227	0.77333	2.96101	0.608488	0.473308	0.948846	8.59782	3.49777	Root
CSS0031309.1	CSS0031309	49.0864	34.2073	3.31742	54.9267	6.19941	3.57776	85.283	48.5172	Root
CSS0004217.1	CSS0004217	0.0175654	0.461989	0.118806	0.034281	6.19013	0.513595	21.1127	0.182576	Root
CSS0039752.1	CSS0039752	2.18689	1.4864	4.5329	2.19398	6.5892	2.13273	11.2222	5.91931	Root
CSS0006734.1	CSS0006734	3.04759	2.38025	21.3485	4.41368	1.76331	0.661581	128.566	44.5582	Root
CSS0021531.1	CSS0021531	17.9518	23.0091	13.2514	17.3547	22.5054	16.6092	26.1558	22.8893	Root
CSS0024496.1	CSS0024496	2.73142	0.652811	2.37612	3.56522	1.6705	0.36561	9.06786	4.78542	Root
CSS0005127.1	CSS0005127	0.667484	2.04882	3.68298	1.68834	1.30856	0.792156	114.954	1.22999	Root
CSS0025476.1	CSS0025476	13.1038	6.70889	11.8806	8.41598	7.86991	20.3088	177.528	23.4562	Root
CSS0029601.1	CSS0029601	12.5505	10.6358	8.33469	9.06732	1.6705	7.00753	33.2358	12.4536	Root
CSS0029649.1	CSS0029649	4.24204	1.61696	0.310723	0.557066	0.111367	0.026115	18.3414	5.77517	Root
CSS0010544.1	CSS0010544	0.122958	13.1968	1.0327	0.582777	3.6287	1.00108	255.212	1.30686	Root
CSS0012013.1	CSS0012013	0.368873	0.251081	0.0731113	0.411372	3.27604	0.19151	194.117	0.432417	Root
CSS0023435.1	CSS0023435	0.0790442	0.0301297	0.0274167	0.0857025	0.0371222	0	2.91817	0.451636	Root
CSS0045267.1	CSS0045267	0.122958	0.100432	0.310723	0.179975	0.296978	0.026115	12.2896	1.33569	Root
CSS0023468.1	CSS0023468	1.05392	12.6344	6.27843	0.557066	0.566114	0.374315	38.5042	6.76493	Root
CSS0018368.1	CSS0018368	3.17933	0.351514	1.01442	2.1597	0.937336	0	87.7605	3.75723	Root
CSS0027364.1	CSS0027364	5.24326	19.6145	23.6424	6.18772	0.566114	0.12187	83.207	19.0936	Root
CSS0047302.1	CSS0047302	0.465482	0.984238	0.913891	0	0.083525	2.41999	21.0931	0.461245	Root
CSS0039735.1	CSS0039735	0.465482	0.984238	0.913891	0	0.083525	2.41999	21.0931	0.461245	Root
CSS0006718.1	CSS0006718	0.122958	2.33003	0.146223	0.179975	0.0464028	0	3.82887	0.336324	Root
CSS0028459.1	CSS0028459	12.3045	129.719	10.3909	4.2337	4.55675	2.75949	132.992	37.2263	Root
CSS0026761.1	CSS0026761	90.9359	181.009	66.0012	82.1801	90.3555	203.758	81.6695	83.149	Old leaf
CSS0048547.2	CSS0048547	70.6655	109.863	31.3008	110.128	128.972	253.829	38.7588	11.2044	Old leaf
CSS0012591.1	CSS0012591	113.464	97.7509	123.512	249.171	461.448	839.433	33.2652	84.0523	Old leaf
CSS0038016.1	CSS0038016	7.12276	7.13071	5.38282	7.14759	7.62862	8.21753	1.65493	5.85205	Old leaf
CSS0040488.1	CSS0040488	46.153	51.0398	50.7209	56.5722	113.501	123.341	48.326	53.6678	Old leaf
CSS0030511.1	CSS0030511	23.3883	17.3648	91.9923	4.56794	62.4489	367.151	81.317	39.9457	Old leaf
CSS0022717.1	CSS0022717	14.1401	77.4033	29.0617	18.3746	66.6158	131.341	24.1287	34.8048	Old leaf
CSS0012395.1	CSS0012395	27.8938	16.6115	14.7776	25.3765	30.3381	15.7909	19.5165	27.7227	Mature leaf
CSS0037210.1	CSS0037210	5.60335	6.85954	5.83976	5.87062	9.01142	8.26105	5.56215	6.2172	Mature leaf
CSS0040819.2	CSS0040819	18.1275	40.0123	21.7506	22.4455	42.4957	40.6959	31.1402	29.8656	Mature leaf
CSS0036416.1	CSS0036416	48.2784	15.1553	90.1828	31.9756	95.599	60.4041	44.0271	40.4839	Mature leaf
CSS0010325.1	CSS0010325	48.2784	15.1553	90.1828	31.9756	95.599	60.4041	44.0271	40.4839	Mature leaf
CSS0001033.2	CSS0001033	5.70875	5.45348	19.2191	4.27655	22.7002	10.6549	20.0551	16.0859	Mature leaf
CSS0014504.1	CSS0014504	147.461	47.6653	36.1535	307.509	431.49	257.407	34.1269	91.3265	Mature leaf
CSS0003285.1	CSS0003285	6.86806	0.77333	0.356417	7.51611	1.90251	0.644171	1.37095	3.67074	Young leaf
CSS0007400.1	CSS0007400	636.745	23.2099	604.703	1311.08	910.933	440.909	1.39054	311.994	Young leaf
CSS0008186.1	CSS0008186	31.4508	21.2013	13.9277	43.3997	42.1801	40.2258	26.3419	32.2872	Young leaf
CSS0021470.1	CSS0021470	636.745	23.2099	604.703	1311.08	910.933	440.909	1.39054	311.994	Young leaf
CSS0007877.1	CSS0007877	6.86806	0.77333	0.356417	7.51611	1.90251	0.644171	1.37095	3.67074	Young leaf
CSS0010064.1	CSS0010064	288.546	25.8212	107.501	619.003	438.024	144.538	2.3502	151.615	Young leaf
CSS0017124.1	CSS0017124	0.49183	7.77347	2.33956	21.417	0.779567	0.38302	13.2591	4.5644	Young leaf
CSS0015632.1	CSS0015632	355.874	221.333	175.504	387.684	141.296	90.1142	94.4488	335.181	Young leaf
CSS0011589.1	CSS0011589	271.991	27.4382	73.2941	289.94	143.477	80.2341	27.517	167.855	Young leaf
CSS0022516.1	CSS0022516	142.262	125.159	61.5506	181.561	92.6664	144.938	91.9321	120.664	Young leaf
CSS0007756.1	CSS0007756	2.51185	10.1035	1.21548	16.412	0.296978	0.165395	5.15086	1.79693	Young leaf
CSS0010705.1	CSS0010705	61.3646	66.6369	26.1099	76.6437	37.6976	16.2697	56.6007	54.2443	Young leaf
CSS0006750.1	CSS0006750	10.6534	10.686	1.07839	16.2492	2.58928	0.853091	2.62439	5.30432	Young leaf
CSS0029097.1	CSS0029097	19.9982	10.5755	10.7748	26.3792	19.4428	25.2271	16.3241	19.8047	Young leaf
CSS0014921.1	CSS0014921	8.63338	0.763287	1.3617	15.7521	0.222733	0.217625	3.1336	3.39207	Young leaf
CSS0003013.1	CSS0003013	523.035	31.7567	37.3507	571.927	71.4696	56.7218	163.887	253.291	Young leaf
CSS0043620.1	CSS0043620	122.747	73.8179	428.131	80.5946	34.0504	0.13928	204.879	355.63	Fruit
CSS0031892.1	CSS0031892	155.436	112.223	706.374	123.403	171.208	111.746	115.15	218.351	Fruit
CSS0033989.1	CSS0033989	155.436	112.223	706.374	123.403	171.208	111.746	115.15	218.351	Fruit
CSS0037645.1	CSS0037645	155.436	112.223	706.374	123.403	171.208	111.746	115.15	218.351	Fruit
CSS0030122.1	CSS0030122	2.61724	2.28986	18.8536	2.60536	5.392	1.81064	3.73095	2.60411	Fruit
CSS0013148.1	CSS0013148	19.5239	26.9661	28.6962	14.7922	23.3499	22.3545	20.5055	20.708	Fruit
CSS0029378.1	CSS0029378	60.8289	84.2528	145.162	55.5695	79.2467	56.4781	114.445	107.778	Fruit
CSS0037359.1	CSS0037359	20.086	6.19668	37.5152	27.2105	12.7608	2.70726	36.8492	18.8438	Fruit
CSS0014070.1	CSS0014070	20.086	6.19668	37.5152	27.2105	12.7608	2.70726	36.8492	18.8438	Fruit
CSS0035043.1	CSS0035043	0.439134	0.241038	6.04996	1.76547	0.129928	0.10446	1.21427	3.48817	Fruit
CSS0048676.1	CSS0048676	15.194	11.7305	36.9029	7.92748	6.10661	7.49501	29.8867	29.5485	Fruit
CSS0037585.1	CSS0037585	2.19567	0.170735	20.3067	0.899876	1.76331	0	1.79203	5.33315	Fruit
CSS0025018.1	CSS0025018	1.29106	0.291254	4.56945	0.865595	0.983739	0.609351	3.12381	0.92249	Fruit
CSS0009250.1	CSS0009250	3.96099	7.41192	49.9259	6.60766	1.63338	8.35681	36.81	8.48499	Fruit
CSS0001753.1	CSS0001753	20.5076	10.1336	36.3454	19.2231	26.2825	26.3501	21.3085	26.4255	Fruit
CSS0008911.1	CSS0008911	106.499	139.22	88.556	91.7616	107.794	51.908	72.5135	92.6622	Flower
CSS0041783.1	CSS0041783	82.566	226.355	69.675	58.3377	15.118	49.5576	53.6336	39.3884	Flower
CSS0031017.1	CSS0031017	76.9539	105.534	18.2961	98.5321	40.5375	42.0365	40.6389	69.6672	Flower
CSS0030745.1	CSS0030745	38.1783	173.166	30.5148	78.3235	49.1777	155.55	102.058	54.2155	Flower
CSS0048619.1	CSS0048619	17.6093	35.6134	9.50447	20.7057	10.4221	16.644	13.9935	17.5657	Flower
CSS0045173.1	CSS0045173	21.5791	82.7564	11.2957	32.5498	16.9092	9.97594	26.9882	22.8124	Flower
CSS0027489.1	CSS0027489	6.92954	24.5256	22.6462	5.06502	18.1806	15.3992	8.3726	19.257	Flower
CSS0000068.1	CSS0000068	76.4533	125.531	51.7354	69.4704	102.68	111.877	57.6387	83.1779	Flower
CSS0040060.1	CSS0040060	16.046	50.628	14.8599	15.3665	13.6703	4.692	20.9462	20.8329	Flower
CSS0033948.1	CSS0033948	10.3636	20.2673	7.08266	8.40741	11.4893	7.37314	8.59782	16.403	Flower
CSS0037781.1	CSS0037781	11.5668	139.25	1.56275	22.7197	2.98834	0.147985	7.99069	18.6035	Flower
CSS0012786.1	CSS0012786	10.3811	43.7183	20.4346	12.0069	29.3358	21.9976	24.7163	19.9873	Flower
CSS0013904.1	CSS0013904	57.1402	103.445	10.9027	63.934	11.0717	26.2195	76.6264	26.6849	Flower
CSS0035361.1	CSS0035361	93.1228	248.972	23.2951	104.934	64.0544	57.279	81.7773	77.7774	Flower
CSS0050201.1	CSS0050201	5.28718	14.4723	5.59301	4.91075	9.38264	11.4471	10.1059	9.23451	Flower
CSS0032466.1	CSS0032466	6.88563	21.1812	0	7.00189	0.241295	0.12187	1.46888	1.41256	Flower
CSS0047583.1	CSS0047583	78.3679	242.103	58.0321	88.0164	40.4632	25.2271	48.659	73.4437	Flower
CSS0001663.1	CSS0001663	133.813	380.458	68.6332	242.538	112.109	95.877	273.75	100.196	Flower
CSS0016183.1	CSS0016183	1.96732	49.9752	6.06824	16.832	2.3387	1.00108	12.0644	6.20759	Flower
CSS0003349.1	CSS0003349	53.6622	215.498	9.96141	87.3394	55.2936	66.9328	42.2939	33.4595	Flower
CSS0042963.1	CSS0042963	23.1775	62.007	26.7496	24.2795	31.5817	34.8984	30.014	33.5171	Flower
CSS0044108.1	CSS0044108	20.2002	81.27	6.36982	36.0636	9.45689	5.08372	24.4519	15.9994	Flower
CSS0020753.1	CSS0020753	17.9518	39.6909	2.89703	9.59011	2.06956	0.182805	3.59385	12.3479	Flower
CSS0034539.1	CSS0034539	1.63358	0.823546	0	1.37124	0.269136	0.05223	1.48846	0.240232	Apical bud
CSS0018512.1	CSS0018512	1.04514	0.552379	0.740252	0.539926	0.296978	0.0870501	0.421078	0.566947	Apical bud
CSS0028490.1	CSS0028490	215.72	4.10769	8.09707	214.728	7.10891	3.09028	16.2556	24.4844	Apical bud
CSS0029478.1	CSS0029478	16.3007	6.52811	1.95573	16.0949	5.10431	4.11747	7.5794	12.3095	Apical bud
CSS0039976.1	CSS0039976	20.2704	15.2959	1.47136	5.56209	3.99064	4.47437	6.91351	5.40041	Apical bud
CSS0049510.2	CSS0049510	340.074	49.0713	72.6726	193.619	41.5769	23.6515	42.852	166.798	Apical bud
CSS0013341.1	CSS0013341	124.521	38.7469	41.1525	75.641	23.7861	10.8116	46.3382	61.384	Apical bud
CSS0040648.1	CSS0040648	211.557	83.6402	30.99	173.89	118.262	51.7948	38.3964	76.0189	Apical bud
CSS0004289.1	CSS0004289	211.557	83.6402	30.99	173.89	118.262	51.7948	38.3964	76.0189	Apical bud

## Sheet: Root specific gene
	Gene expression									Cell expressed
Gene ID	Cluster 1	Cluster 2	Cluster 3	Cluster 4	Cluster 5	Cluster 6	Cluster 7	Cluster 8		Cluster 1	Cluster 2	Cluster 3	Cluster 4	Cluster 5	Cluster 6	Cluster 7	Cluster 8		GO_annotation	KEGG_annotation	KOG_class_annotation	Pfam_annotation	TrEMBL_annotation	nr_annotation
CSS0029601	0.729941	1.01493	0.903433	0.995667	0.691263	0.986869	0.970928	1.59981		28.1441	33.5652	39.5335	36.0787	26.1863	39.5161	35.316	57.6208		Cellular Component: cytosol (GO:0005829);; Molecular Function: [protein-PII] uridylyltransferase activity (GO:0008773);; Molecular Function: amino acid binding (GO:0016597);; Biological Process: methylglyoxal catabolic process to D-lactate via S-lactoyl-glutathione (GO:0019243);; Biological Process: cysteine biosynthetic process (GO:0019344);;	--	--	ACT domain	Uncharacterized protein {ECO:0000313|EMBL:EMJ02231.1} OS=Prunus persica (Peach) PE=4 SV=1	hypothetical protein PRUPE_ppa005671mg [Prunus persica]
CSS0010544	0.0475203	0.041895	0.0246851	0.0592034	0.0396911	0.015916	0.0151296	0.168251		1.89255	1.56522	1.28913	2.82729	1.75747	0.806452	0.743494	8.55019		Molecular Function: glutathione transferase activity (GO:0004364);; Molecular Function: peroxidase activity (GO:0004601);; Biological Process: auxin-activated signaling pathway (GO:0009734);;	K00799|2.34498e-115|aip:107630048|K00799 glutathione S-transferase [EC:2.5.1.18] | (RefSeq) probable glutathione S-transferase parC	Posttranslational modification, protein turnover, chaperones	Glutathione S-transferase, N-terminal domain	Glutathione S-transferase {ECO:0000313|EMBL:ACH87175.1} OS=Camellia sinensis (Tea) PE=2 SV=1	glutathione S-transferase [Camellia sinensis]
CSS0024718	0.0144795	0.0105863	0.0342339	0.0409678	0.0357594	0.0679897	0.0362698	0.0249242		0.610501	0.434783	1.90301	2.27412	1.40598	3.22581	1.85874	1.48699		--	--	--	Protein of unknown function DUF260	Uncharacterized protein {ECO:0000313|EnsemblPlants:PGSC0003DMT400066165} OS=Solanum tuberosum (Potato) PE=4 SV=1	PREDICTED: LOB domain-containing protein 37-like [Solanum tuberosum]
CSS0005127	0.00608261	0.0133152	0.0174513	0.0110783	0.00887528	0.00866392	0	0.0406036		0.274725	0.521739	0.92081	0.676091	0.527241	0.403226	0	2.97398		Molecular Function: nucleotide binding (GO:0000166);; Cellular Component: cytosol (GO:0005829);; Biological Process: fatty acid beta-oxidation (GO:0006635);; Molecular Function: zinc ion binding (GO:0008270);; Biological Process: systemic acquired resistance (GO:0009627);; Biological Process: response to endoplasmic reticulum stress (GO:0034976);; Molecular Function: mannitol dehydrogenase activi…	K00083|0|adu:107480464|K00083 cinnamyl-alcohol dehydrogenase [EC:1.1.1.195] | (RefSeq) probable cinnamyl alcohol dehydrogenase 1	Secondary metabolites biosynthesis, transport and catabolism	Alcohol dehydrogenase GroES-like domain	Uncharacterized protein {ECO:0000313|EMBL:KCW72648.1} OS=Eucalyptus grandis (Flooded gum) PE=4 SV=1	PREDICTED: probable cinnamyl alcohol dehydrogenase 1 isoform X1 [Eucalyptus grandis]
CSS0029649	0.0725049	0.0439005	0.13228	0.0723901	0.0200037	0.0989246	0.0350944	0.100848		3.11355	1.73913	7.3051	3.99508	1.05448	5.24194	1.85874	6.3197		Molecular Function: transmembrane transporter activity (GO:0022857);; Biological Process: transmembrane transport (GO:0055085);;	K03327|0|pxb:103947597|K03327 multidrug resistance protein, MATE family | (RefSeq) protein DETOXIFICATION 19-like	General function prediction only	MatE	MATE efflux family protein {ECO:0000256|RuleBase:RU004914} OS=Erythranthe guttata (Yellow monkey flower) PE=3 SV=1	PREDICTED: MATE efflux family protein ALF5-like [Pyrus x bretschneideri]
CSS0047302	0	0	0	0	0	0	0	0		0	0	0	0	0	0	0	0		--	--	--	Protein of unknown function DUF260	Putative uncharacterized protein {ECO:0000313|EMBL:CBI19415.3} OS=Vitis vinifera (Grape) PE=4 SV=1	PREDICTED: LOB domain-containing protein 38 [Vitis vinifera]
CSS0037081	0.00152881	0.00414433	0.00316492	0.00251223	0	0.00997282	0.00711169	0		0.0610501	0.173913	0.184162	0.122926	0	0.604839	0.371747	0		Molecular Function: peptidase activity (GO:0008233);;	--	--	Subtilase family	Uncharacterized protein {ECO:0000313|EMBL:EYU46755.1} OS=Erythranthe guttata (Yellow monkey flower) PE=4 SV=1	hypothetical protein MIMGU_mgv1a001548mg [Erythranthe guttata]
CSS0021531	0.0363431	0.0389048	0.0388821	0.119875	0.108595	0.0432009	0.091161	0.0380699		1.5873	1.6087	2.20994	7.12969	5.09666	2.41935	5.20446	2.23048		Molecular Function: catalytic activity (GO:0003824);; Biological Process: cellular process (GO:0044763);; Biological Process: response to stimulus (GO:0050896);;	--	Posttranslational modification, protein turnover, chaperones	Ring finger domain	Uncharacterized protein {ECO:0000313|EMBL:KDO57845.1} OS=Citrus sinensis (Sweet orange) PE=4 SV=1	PREDICTED: E3 ubiquitin-protein ligase RLIM-like [Citrus sinensis]
CSS0015472	0.0244693	0.0157688	0.0400614	0.03461	0.0102199	0.0386411	0.0369222	0.0359128		1.0989	0.608696	2.08717	1.90535	0.702988	1.81452	1.48699	2.23048		--	--	--	UDP-glucoronosyl and UDP-glucosyl transferase	UDP-glycosyltransferase 94P1 {ECO:0000313|EMBL:BAO51835.1} OS=Camellia sinensis (Tea) PE=2 SV=1	UDP-glycosyltransferase 94P1 [Camellia sinensis]
CSS0039735	0.00812319	0.00240745	0.00874712	0.00530038	0.00512489	0.00353794	0.0131762	0		0.3663	0.0869565	0.552486	0.307314	0.351494	0.201613	0.743494	0		--	--	--	Protein of unknown function DUF260	Putative uncharacterized protein {ECO:0000313|EMBL:CBI19415.3} OS=Vitis vinifera (Grape) PE=4 SV=1	PREDICTED: LOB domain-containing protein 38 [Vitis vinifera]
CSS0013719	0.0176418	0.00504837	0.0149942	0.0128236	0	0.00696328	0.00631856	0		0.702076	0.217391	0.859423	0.676091	0	0.403226	0.371747	0		--	--	--	bZIP transcription factor	Coffea canephora DH200=94 genomic scaffold, scaffold_5 {ECO:0000313|EMBL:CDP00505.1} OS=Coffea canephora (Robusta coffee) PE=4 SV=1	unnamed protein product [Coffea canephora]
CSS0001949	0	0	0	0	0	0	0.00765958	0		0	0	0	0	0	0	0.371747	0		Molecular Function: transferase activity (GO:0016740);;	--	--	UDP-glucoronosyl and UDP-glucosyl transferase	Putative uncharacterized protein {ECO:0000313|EMBL:CCB45577.1} OS=Vitis vinifera (Grape) PE=4 SV=1	PREDICTED: 7-deoxyloganetin glucosyltransferase isoform X2 [Vitis vinifera]
CSS0012013	0.00392738	0.0117872	0.00528162	0.00491539	0.00367469	0	0.00704303	0.0102576		0.152625	0.478261	0.306937	0.307314	0.175747	0	0.371747	0.743494		Biological Process: glutathione metabolic process (GO:0006749);; Cellular Component: chloroplast (GO:0009507);; Biological Process: de-etiolation (GO:0009704);; Molecular Function: transferase activity (GO:0016740);; Biological Process: response to cadmium ion (GO:0046686);; Biological Process: lateral root development (GO:0048527);; Biological Process: response to growth hormone (GO:0060416);; B…	K00799|7.7393e-110|cit:102621583|K00799 glutathione S-transferase [EC:2.5.1.18] | (RefSeq) glutathione S-transferase U17-like	Posttranslational modification, protein turnover, chaperones	Glutathione S-transferase, N-terminal domain	Glutathione S-transferase 1 {ECO:0000313|EMBL:BAI40146.1} OS=Diospyros kaki (Kaki persimmon) PE=2 SV=1	glutathione S-transferase 1 [Diospyros kaki]
CSS0025476	0.00416749	0.00364955	0.00101603	0.00413087	0	0	0	0		0.18315	0.130435	0.0613874	0.307314	0	0	0	0		--	--	--	Probable lipid transfer	Coffea canephora DH200=94 genomic scaffold, scaffold_4 {ECO:0000313|EMBL:CDP00155.1} OS=Coffea canephora (Robusta coffee) PE=4 SV=1	PREDICTED: uncharacterized protein LOC103453274 [Malus domestica]
CSS0004217	0	0	0	0	0	0	0	0		0	0	0	0	0	0	0	0		--	--	--	GDSL/SGNH-like Acyl-Esterase family found in Pmr5 and Cas1p	Uncharacterized protein {ECO:0000313|EnsemblPlants:PGSC0003DMT400026194} OS=Solanum tuberosum (Potato) PE=4 SV=1	PREDICTED: protein trichome birefringence-like 19 [Nicotiana tomentosiformis]
CSS0018368	0.000541658	0	0.00347539	0.00132369	0.00408146	0	0	0		0.030525	0	0.245549	0.0614628	0.175747	0	0	0		Molecular Function: peroxidase activity (GO:0004601);; Biological Process: response to oxidative stress (GO:0006979);; Molecular Function: heme binding (GO:0020037);; Molecular Function: metal ion binding (GO:0046872);; Biological Process: oxidation-reduction process (GO:0055114);;	K00430|0|vvi:100257059|K00430 peroxidase [EC:1.11.1.7] | (RefSeq) peroxidase 4-like	--	Peroxidase	Putative uncharacterized protein {ECO:0000313|EMBL:CCB49814.1} OS=Vitis vinifera (Grape) PE=3 SV=1	PREDICTED: peroxidase 4 [Vitis vinifera]
CSS0023468	0	0	0	0	0	0	0	0		0	0	0	0	0	0	0	0		Molecular Function: 1-acylglycerol-3-phosphate O-acyltransferase activity (GO:0003841);; Molecular Function: glycerol-3-phosphate O-acyltransferase activity (GO:0004366);; Biological Process: suberin biosynthetic process (GO:0010345);;	K13508|0|vvi:100261491|K13508 glycerol-3-phosphate acyltransferase [EC:2.3.1.15] | (RefSeq) glycerol-3-phosphate acyltransferase 5	--	Acyltransferase	Putative uncharacterized protein {ECO:0000313|EMBL:CCB56326.1} OS=Vitis vinifera (Grape) PE=4 SV=1	PREDICTED: glycerol-3-phosphate acyltransferase 5 [Vitis vinifera]
CSS0024496	0.00210768	0.00198527	0.000717994	0.00410508	0	0.00255343	0	0.00480496		0.0915751	0.0869565	0.0613874	0.245851	0	0.201613	0	0.371747		Cellular Component: membrane (GO:0016020);; Molecular Function: transmembrane transporter activity (GO:0022857);; Biological Process: transmembrane transport (GO:0055085);;	K14611|0|tcc:TCM_007245|K14611 solute carrier family 23 (nucleobase transporter), member 1/2 | (RefSeq) Xanthine/uracil permease family protein isoform 1	Nucleotide transport and metabolism	Permease family	Xanthine/uracil permease family protein isoform 1 {ECO:0000313|EMBL:EOX98498.1} OS=Theobroma cacao (Cacao) PE=4 SV=1	PREDICTED: nucleobase-ascorbate transporter 4 isoform X2 [Sesamum indicum]
CSS0006718	0	0	0	0	0	0	0	0		0	0	0	0	0	0	0	0		--	--	--	Domain of unknown function (DUF303)	Uncharacterized protein {ECO:0000313|EMBL:ESR47938.1} OS=Citrus clementina PE=4 SV=1	PREDICTED: probable carbohydrate esterase At4g34215 [Sesamum indicum]
CSS0039752	0.00557797	0.00731931	0.00427266	0.00109114	0.0077155	0	0	0.0260689		0.213675	0.304348	0.245549	0.0614628	0.351494	0	0	1.48699		--	--	--	Protein tyrosine kinase	Uncharacterized protein {ECO:0000313|EnsemblPlants:Solyc01g102700.2.1} OS=Solanum lycopersicum (Tomato) PE=4 SV=1	PREDICTED: probable leucine-rich repeat receptor-like protein kinase At5g49770 [Nicotiana tomentosiformis]
CSS0041915	0	0	0	0	0	0	0	0		0	0	0	0	0	0	0	0		--	--	--	--	Uncharacterized protein {ECO:0000313|EMBL:KDO60598.1} OS=Citrus sinensis (Sweet orange) PE=4 SV=1	hypothetical protein CISIN_1g035708mg [Citrus sinensis]
CSS0023435	0	0	0	0	0	0	0	0		0	0	0	0	0	0	0	0		--	--	--	Transferase family	Uncharacterized protein {ECO:0000313|EMBL:ERP56080.1} OS=Populus trichocarpa (Western balsam poplar) PE=4 SV=1	PREDICTED: BAHD acyltransferase At5g47980-like [Prunus mume]
CSS0003753	0	0.00427484	0.0107134	0	0	0	0	0		0	0.173913	0.613874	0	0	0	0	0		--	--	--	Formin Homology 2 Domain	Formin-like protein {ECO:0000256|RuleBase:RU361260} OS=Solanum tuberosum (Potato) PE=3 SV=1	PREDICTED: formin-like protein 8 [Nicotiana tomentosiformis]
CSS0031309	0.00360545	0.0210864	0.00785808	0.0161404	0.0230519	0.00857193	0.0166252	0.0131883		0.152625	0.913043	0.429711	1.04487	1.05448	0.403226	0.743494	1.11524		Molecular Function: UDP-glucose 6-dehydrogenase activity (GO:0003979);; Molecular Function: NAD binding (GO:0051287);; Biological Process: oxidation-reduction process (GO:0055114);;	K00012|0|vvi:100264653|K00012 UDPglucose 6-dehydrogenase [EC:1.1.1.22] | (RefSeq) UDP-glucose 6-dehydrogenase-like	--	UDP-glucose/GDP-mannose dehydrogenase family, NAD binding domain	UDP-glucose 6-dehydrogenase {ECO:0000256|PIRNR:PIRNR000124} OS=Vitis vinifera (Grape) PE=3 SV=1	PREDICTED: UDP-glucose 6-dehydrogenase 1 [Vitis vinifera]
CSS0006997	0	0	0.00321348	0.0077991	0	0.00660592	0	0		0	0	0.184162	0.43024	0	0.403226	0	0		--	--	--	WRKY DNA -binding domain	Coffea canephora DH200=94 genomic scaffold, scaffold_62 {ECO:0000313|EMBL:CDP12079.1} OS=Coffea canephora (Robusta coffee) PE=4 SV=1	unnamed protein product [Coffea canephora]
CSS0016965	0.0377439	0.0166104	0.0282348	0.0245133	0.00933172	0.0413875	0.0346969	0.0627536		1.7094	0.652174	1.65746	1.47511	0.527241	2.21774	1.85874	3.71747		Molecular Function: zinc ion binding (GO:0008270);;	K16280|0|tcc:TCM_017007|K16280 E3 ubiquitin-protein ligase RGLG [EC:2.3.2.27] | (RefSeq) RING domain ligase2 isoform 1	Signal transduction mechanisms	Copine	RING domain ligase2 isoform 1 {ECO:0000313|EMBL:EOY02574.1} OS=Theobroma cacao (Cacao) PE=4 SV=1	RING domain ligase2 isoform 1 [Theobroma cacao]
CSS0027364	0.00168954	0.00125825	0.00281309	0	0	0	0	0		0.0610501	0.0434783	0.122775	0	0	0	0	0		--	--	Signal transduction mechanisms	Protein of unknown function (DUF568)	Uncharacterized protein {ECO:0000313|EMBL:EEF04279.2} OS=Populus trichocarpa (Western balsam poplar) PE=4 SV=2	PREDICTED: cytochrome b561 and DOMON domain-containing protein At4g17280 [Sesamum indicum]
CSS0018192	0.00082875	0	0	0	0	0	0.0105212	0		0.030525	0	0	0	0	0	0.371747	0		Biological Process: lipid metabolic process (GO:0006629);; Biological Process: macromolecule metabolic process (GO:0043170);; Biological Process: cellular biosynthetic process (GO:0044249);; Biological Process: regulation of primary metabolic process (GO:0080090);; Biological Process: organic substance biosynthetic process (GO:1901576);;	--	--	AP2 domain	DNA binding protein, putative {ECO:0000313|EMBL:EEF37078.1} OS=Ricinus communis (Castor bean) PE=2 SV=1	DNA binding protein, putative [Ricinus communis]
CSS0045267	0	0.00570957	0	0.000812681	0	0	0	0		0	0.217391	0	0.0614628	0	0	0	0		--	--	Function unknown	Protein of unknown function (DUF563)	Glycosyltransferase family 61 protein {ECO:0000313|EMBL:EOY12265.1} OS=Theobroma cacao (Cacao) PE=4 SV=1	Glycosyltransferase family 61 protein [Theobroma cacao]
CSS0047898	0	0	0	0	0	0	0	0		0	0	0	0	0	0	0	0		Biological Process: carbohydrate metabolic process (GO:0005975);; Molecular Function: cellulase activity (GO:0008810);; Biological Process: trichoblast differentiation (GO:0010054);; Molecular Function: carbohydrate binding (GO:0030246);;	--	--	Glycosyl hydrolase family 9	Putative uncharacterized protein {ECO:0000313|EMBL:CBI27137.3} OS=Vitis vinifera (Grape) PE=4 SV=1	unnamed protein product [Vitis vinifera]
CSS0028459	0	0.000900021	0.000776239	0	0.0038628	0	0.00757852	0.00692601		0	0.0434783	0.0613874	0	0.175747	0	0.371747	0.371747		Biological Process: lipid transport (GO:0006869);; Molecular Function: lipid binding (GO:0008289);;	--	--	Probable lipid transfer	Uncharacterized protein {ECO:0000313|EMBL:KCW60709.1} OS=Eucalyptus grandis (Flooded gum) PE=4 SV=1	PREDICTED: non-specific lipid-transfer protein-like protein At2g13820 [Eucalyptus grandis]
CSS0049943	0.000687782	0	0	0	0	0	0	0		0.030525	0	0	0	0	0	0	0		--	K09422|1.708e-30|tcc:TCM_015157|K09422 myb proto-oncogene protein, plant | (RefSeq) Myb domain protein 18, putative	--	--	Myb domain protein 18, putative {ECO:0000313|EMBL:EOY23173.1} OS=Theobroma cacao (Cacao) PE=4 SV=1	Myb domain protein 18, putative [Theobroma cacao]
CSS0012324	0.00317761	0.00295925	0.0130326	0.0185434	0.016128	0	0.0151429	0.0224594		0.1221	0.130435	0.798036	1.04487	0.878735	0	0.743494	1.11524		Molecular Function: 2,3-dihydro-2,3-dihydroxybenzoate dehydrogenase activity (GO:0008667);; Biological Process: oxidation-reduction process (GO:0055114);;	--	General function prediction only	short chain dehydrogenase	Putative uncharacterized protein {ECO:0000313|EMBL:CCB60053.1} OS=Vitis vinifera (Grape) PE=3 SV=1	PREDICTED: short-chain dehydrogenase reductase 3b-like [Populus euphratica]
CSS0006734	0.00135572	0.00101407	0	0.00241244	0	0.00318614	0	0.0117663		0.0610501	0.0434783	0	0.122926	0	0.201613	0	0.743494		Molecular Function: copper ion binding (GO:0005507);; Molecular Function: electron transfer activity (GO:0009055);;	--	--	Plastocyanin-like domain	Uncharacterized protein {ECO:0000313|EnsemblPlants:Solyc01g090120.2.1} OS=Solanum lycopersicum (Tomato) PE=4 SV=1	PREDICTED: uclacyanin-3-like [Solanum lycopersicum]
