# Supplementary material for: Root-specific theanine metabolism and regulation at the single-cell level in tea plants (Camellia sinensis)
Source: eLife. 2024 Oct 14;13:RP95891. doi: 10.7554/eLife.95891 (PMC11473105; doi:10.7554/eLife.95891)
Supplement: Supplementary file 9. [file elife-95891-supp9.xlsx]

## Sheet: Primer
Nucleotide sequences of primers used for in situ RT-PCR
Gene ID	Gene name	Forward primer 5'-3'	Reverse primer 5'-3'
CSS0035405	CsAAP1	AGTTGGGTTGGGTGGTTG	CCAATAGTAACCCCTACCAGAT
CSS0022328	CsAMT1.1	GAATCACCAGCGGCTCAATC	TCCGACCATGTGTACGACTC
CSS0013678	CsLHW	GCAACTTGGCACATTGGAAGAG	GCATCTTGAACCAGGCATACTG
CSS0014004	CsWAT1	TGGCGGACACTACTAACTCAG	AGAGGAGAAGAAGAGCGAGAAC
CSS0016108	CsPP2	GGAAGTTGCGTCATAGACAAGG	AAGCATTCGTATCAGGCTCAAC
CSS0001725	CsAMT3.1	ATACAACACCTCCTCAGCAGTA	CGCCGAACGACATCTTATAGG
CSS0037113	CsNRT1.1	TCTCTACGGTACGAGGTGGTA	AACGGAATTGCTTGGTATGAGG
CSS0034664	CsNRT3.2	CTTACTTCGTGAGAGCCTATGC	TTCACTGACACCTTTCTCCTCT
CSS0049154	CsTSI	TGGAAGGTGTGGAGGTAGTAG	GCAGCCTTGAAGCATATTGAG
CSS0043348	CsAlaDC	CGAATGTGAGCAAGGTGGAGC	CATATCGCTGGTGGAGTCATC
CSS0024718	CsLBD37	GCCTGGAGCAGAGCTTGAAGAC	GCTTTCCTTCGTTTCGTCCTCCC
Nucleotide sequences of primers used for qRT-PCR
Gene ID	Gene name	Forward primer 5'-3'	Reverse primer 5'-3'
CSS0043348	CsAlaDC	CACTGTGATGGGGCTCTGTT	TGTTATCTGGACACCGCACG
CSS0024718	CsLBD37	GCCTGGAGCAGAGCTTGAAGAC	GCTTTCCTTCGTTTCGTCCTCCC
CSS0050274	CsGAPDH	TTGGCATCGTTGAGGGTCT	CAGTGGGAACACGGAAAGC
Nucleotide sequences of primers used for CsLBD37 gene clone
	Primer 5'-3'
Forward	ATGAGTTGCAGTGGATGTCGA
Reverse	TTAGAAGAACAGTCTCAGAAGCTTTCC
Nucleotide sequences of primers used for sODN and asODN of CsLBD37
	Primer 5'-3'
sODN	CTAGATCTGCATTCGGCTAGTAAGGTCA
AsODN	TGACCTTACTAGCCGAATGCAGATCTAG
Nucleotide sequences of primers used for constructing pDONR207-CsLBD37
	Primer 5'-3'	Vector
Forward	GGGGACAAGTTTGTACAAAAAAGCAGGCTTCATGAGTTGCAGTGGATGTCGA	pDONR207
Reverse	GGGGACCACTTTGTACAAGAAAGCTGGGTCTTAGAAGAACAGTCTCAGAAGCTTTCC
Nucleotide sequences of primers used for constructing GST-CsLBD37
	Primer 5'-3'	Restriction Enzyme cutting site	Vector
Forward	TCCCCCGGGTATGAGTTGCAGTGGATGTCGA	Sma I	pGEX-4T-1
Reverse	CCGCTCGAGTTAGAAGAACAGTCTCAGAAGCTTTCC	Xho I
Nucleotide sequences of primers used for constructing AD-CsLBD37
	Primer 5'-3'	Restriction Enzyme cutting site	Vector
Forward	CGGAATTCCGATGAGTTGCAGTGGATG	EcoR I	pGADT7 AD
Reverse	CCATCGATGGTTAGAAGAACAGTCTCAG	Cla I
Nucleotide sequences of primers used for constructing ProCsAlaDC-pAbAi
	Primer 5'-3'	Restriction Enzyme cutting site	Vector
Forward	AAAAGCTTGAATTCGAGCTCTCAGTGATTGTATACGACTCAC	Sac I	pAbAi
Reverse	TACAGAGCACATGCCTCGAGATTACGCCAGCTGCCCTTG	Xho I
Nucleotide sequences of primers used for constructing 35S-CsLBD37
	Primer 5'-3'	Restriction Enzyme cutting site	Vector
Forward	CGGCCGCTCTAGAACTAGTGATGAGTTGCAGTGGATGT	BamH I	pGreenII 62-SK
Reverse	TTCCTGCAGCCCGGGGGATCTTAGAAGAACAGTCTCAGAAGCTT	Sma I
Nucleotide sequences of primers used for constructing pGreenII 0800-LUC-proCsAlaDC
	Primer 5'-3'	Restriction Enzyme cutting site	Vector
Forward	ATCGAATTCCTGCAG TCAGTGATTGTATACGACTCA	Pst I	pGreenII 0800-Luc
Reverse	TGGCGTCTTCCATGG ATTACGCCAGCTGCCCTTGAT	NocI
